# Supplementary material for: PKCδ is an activator of neuronal mitochondrial metabolism that mediates the spacing effect on memory consolidation
Source: eLife. 2024 Oct 30;13:RP92085. doi: 10.7554/eLife.92085 (PMC11524582; doi:10.7554/eLife.92085)
Supplement: Figure 1—figure supplement 1—source data 1. [file elife-92085-fig1-figsupp1-data1.xlsx]

## Sheet: Fig.S1a
	5x spaced				5x spaced no induction				5x massed				1x
	tub-GAL80ts; VT30559-GAL4/+	tub-GAL80ts; VT30559-GAL4>UAS-PKCδ RNAi KK109117	+/UAS-PKCδ RNAi KK109117		tub-GAL80ts; VT30559-GAL4/+	tub-GAL80ts; VT30559-GAL4>UAS-PKCδ RNAi KK109117	+/UAS-PKCδ RNAi KK109117		tub-GAL80ts; VT30559-GAL4/+	tub-GAL80ts; VT30559-GAL4>UAS-PKCδ RNAi KK109117	+/UAS-PKCδ RNAi KK109117		tub-GAL80ts; VT30559-GAL4/+	tub-GAL80ts; VT30559-GAL4>UAS-PKCδ RNAi KK109117	+/UAS-PKCδ RNAi KK109117
	0.21	0.03	0.38		0.41	0.19	0.45		0.46	0.02	0.36		0.22	0.24	0.42
	0.38	0.31	0.38		0.24	0.13	0.08		0.16	0.15	0.21		0.27	0.24	0.29
	0.53	0.39	0.38		0.12	0.19	0.32		0.36	0.47	0.25		0.39	0.37	0.21
	0.17	0.12	0.5		0.07	0.1	0.23		0.46	0.13	0.18		0.26	0.23	0.49
	0.26	0.21	0.35		0.41	0.55	0.18		0.09	0.21	0.19		0.02	0.03	0.14
	0.28	0.13	0.78		0.23	0.14	0.35		0.12	0.16	0.34		0.45	0.48	0.61
	0.48	0.23	0.42		0.02	0.41	0.34		0.38	0.25	0.33		0.43	0.05	0.11
	0.41	0.17	0.4		0.42	0.52	0.38		0.22	0.27	0.29		0.46	0.45	0.23
	0.66	0.31	0.34		0.32	0.26	0.76		0.51	0.02	0.1		0.63	0.48	0.5
	0.37	-0.09	0.29		0.4	-0.05	0.28		0.25	0.3	0.24		0.38	0.52	0.51
	0.35	0.17	0.6		0.27	0.26	0.25		0.53	0.12	0.31		0.45	0.64	0.54
	0.4	0.14	0.17			0.39	0.4		0.12	0.13	0.19		0.58	0.28	0.42
	0.32	0.46	0.3			0.5	0.33		0.19	0.27	0.21		0.68	0.64	0.64
	0.37	0.48	0.4			0.32	0.4		0.21	0.32	0.23		0.42	0.05	0.28
		0.04	0.58				0.2		0.2	0.31	0.22		0.41	0.47	0.21
		0.08	-0.11						0.07	0.29	0.16		0.62	0.46	0.34
		0.23											0.6		0.18
		0.24													0.84

## Sheet: Fig.S1b
	tub-GAL80ts; elav-GAL4/+	tub-GAL80ts; elav-GAL4/UAS-PKCδ RNAi JF02991	tub-GAL80ts; elav-GAL4/UAS-PKCδ RNAi KK109117
	0.573905	0.172207	0.145479
	1.19655	0.0630315	0.28497
	1.21888	0.534236	0.233617
	0.79676	0.268976	0.260415
	0.688829	0.588678	0.546724
	1.52508

## Sheet: Fig.S1c
	Time traces						δCKAR response
		No RNAi		PKCδ RNAi JF02991			No RNAi	PKCδ RNAi JF02991
	Time (s)	Mean	SEM	Mean	SEM		-2.797	-0.187712
	0	-1.06156	0.568337	-1.44529	0.680288		-1.20295	0.08877
	2	-0.507415	0.535351	-0.657495	0.315992		-2.74075	0.370285
	4	-0.093093	0.579827	-0.00197429	0.364325		-1.7378	0.604935
	6	-0.228768	0.49985	-0.251509	0.21194		-4.06565	-0.83975
	8	-0.320139	0.642967	0.208525	0.279466			-2.5977
	10	-0.432241	0.468657	0.170728	0.386464
	12	0.26257	0.405979	0.362339	0.253217
	14	0.265432	0.39986	0.265106	0.290555
	16	-0.240556	0.456607	0.361641	0.268818
	18	-0.310909	0.456893	0.303804	0.30496
	20	-0.380687	0.166536	0.207249	0.298148
	22	-0.439952	0.244873	-0.0501107	0.232296
	24	-0.65097	0.310819	-0.229461	0.266767
	26	-0.746101	0.393533	-0.0288254	0.127213
	28	-0.127033	0.631998	-0.442205	0.126312
	30	-0.321998	0.56591	-0.185017	0.166344
	32	0.173648	0.579339	0.238071	0.36972
	34	0.473698	0.366631	0.245691	0.350303
	36	-0.105783	0.493322	0.177937	0.385807
	38	0.455263	0.174467	0.0445967	0.192207
	40	0.414853	0.186319	-0.0932537	0.261771
	42	0.329014	0.26096	-0.37666	0.334497
	44	0.437751	0.411076	0.0337958	0.296274
	46	0.351904	0.327155	0.11718	0.236126
	48	-0.156762	0.394679	0.165445	0.156279
	50	0.0952525	0.316987	0.0379797	0.156397
	52	-0.0401804	0.217858	-0.0194408	0.379035
	54	-0.0437797	0.226097	0.016157	0.396666
	56	0.144412	0.224717	-0.492134	0.352683
	58	-0.127598	0.299024	-0.28381	0.350855
	60	-0.126304	0.33974	-0.319603	0.274284
	62	-0.587892	0.149234	-0.216391	0.252344
	64	-0.447692	0.201582	-0.105935	0.15179
	66	-0.374335	0.228412	-0.0612345	0.162072
	68	0.11299	0.267867	-0.154956	0.232286
	70	0.149361	0.323636	-0.150891	0.203442
	72	0.0827432	0.300023	-0.0775429	0.27109
	74	-0.0087514	0.252538	-0.449353	0.208941
	76	-0.0576205	0.271557	0.108138	0.230082
	78	-0.15128	0.260376	0.240564	0.251452
	80	-0.130203	0.267237	-0.0538676	0.271121
	82	0.0750722	0.192555	-0.110553	0.263615
	84	0.0205715	0.289725	0.374389	0.21189
	86	0.38332	0.503695	-0.338329	0.129706
	88	0.167121	0.409394	-0.0884787	0.109947
	90	0.247914	0.386697	0.0842564	0.121149
	92	0.349882	0.575567	0.0639319	0.316983
	94	0.478523	0.363269	0.230406	0.125969
	96	0.663718	0.269759	0.0898641	0.0878199
	98	0.299137	0.236293	0.122283	0.172078
	100	0.467783	0.456436	0.374828	0.231632
	102	0.249977	0.391523	0.281495	0.129467
	104	0.0123725	0.297183	0.294057	0.203843
	106	0.0875913	0.260496	0.227311	0.165415
	108	0.218305	0.187982	-0.0353179	0.228422
	110	0.34763	0.180979	-0.0726641	0.251322
	112	0.276679	0.178082	0.125079	0.284451
	114	-0.25334	0.488762	-0.0302289	0.279148
	116	-1.60883	0.926248	-0.527364	0.416763
	118	-1.79501	1.10469	-0.523597	0.38637
	120	-2.93833	0.797395	-0.585579	0.263593
	122	-2.92654	0.637838	-1.18266	0.408617
	124	-3.00237	0.482323	-1.01637	0.486117
	126	-2.50879	0.574021	-0.647454	0.61824
	128	-2.83126	0.725799	-1.04424	0.710335
	130	-2.18837	0.433318	-0.976464	0.744635
	132	-2.49741	0.565748	-0.947485	0.678145
	134	-2.49597	0.577902	-0.74686	0.740468
	136	-2.41729	0.514978	-0.89373	0.669131
	138	-2.2328	0.481929	-0.623195	0.564172
	140	-2.09409	0.296112	-0.591001	0.496424
	142	-1.78979	0.41426	-0.680462	0.461623
	144	-1.55312	0.481875	-0.789496	0.424221
	146	-1.58445	0.55994	-0.795393	0.468065
	148	-2.16607	0.251927	-0.668098	0.402389
	150	-1.95407	0.351539	-0.330087	0.441937
	152	-2.24088	0.471514	-0.28478	0.479634
	154	-2.04126	0.50678	-0.250986	0.421956
	156	-2.1673	0.57854	-0.277585	0.463673
	158	-1.85653	0.698318	-0.348848	0.553448
	160	-1.73194	0.667764	-0.165457	0.43801
	162	-1.94539	0.702053	-0.12668	0.485314
	164	-2.08661	0.712497	-0.163603	0.521796
	166	-2.16652	0.680729	-0.180742	0.513384
	168	-2.32578	0.65237	-0.193991	0.499416
	170	-2.58695	0.523563	-0.129244	0.493453
	172	-2.46154	0.6228	-0.433115	0.537776
	174	-2.86505	0.410928	-0.235866	0.397799
	176	-2.52605	0.130994	-0.296704	0.451669
	178	-2.56933	0.223911	-0.414119	0.550557
	180	-2.5798	0.38092	-0.121268	0.509602
	182	-2.20376	0.755885	-0.378296	0.499555
	184	-2.41251	0.830538	-0.029274	0.665679
	186	-2.09274	0.827979	0.101548	0.646377
	188	-2.1953	0.574037	0.151055	0.54401
	190	-1.91681	0.472327	0.0259196	0.512072
	192	-1.45893	0.546543	0.233119	0.445297
	194	-1.43501	0.60547	0.0661728	0.4608
	196	-1.63291	0.705019	-0.0772659	0.325635
	198	-1.50337	0.747353	-0.124916	0.495781
	200	-1.25012	0.586299	-0.114411	0.438754
	202	-1.45193	0.527671	-0.270666	0.563984
	204	-1.78662	0.558064	-0.283846	0.596592
	206	-1.60482	0.586252	-0.480747	0.594272
	208	-1.86257	0.533032	-0.492808	0.500913
	210	-1.65049	0.37631	-0.516815	0.580571
	212	-1.67108	0.252348	-0.485236	0.53239
	214	-1.71486	0.190816	-0.271594	0.473938
	216	-2.03615	0.280177	0.0736766	0.544799
	218	-1.83445	0.417028	0.103597	0.535271
	220	-1.83414	0.458877	0.220463	0.569308
	222	-2.18321	0.559364	0.100475	0.595486
	224	-2.22307	0.715414	0.0141096	0.524761
	226	-2.33561	0.71096	-0.115223	0.547955
	228	-1.83447	0.355947	0.208872	0.670144
	230	-2.06293	0.329855	0.317668	0.516032
	232	-2.4999	0.433678	0.467926	0.372032
	234	-2.61755	0.342793	0.407084	0.650628
	236	-2.0748	0.481039	0.128843	0.466182
	238	-2.1281	0.573193	0.0408682	0.406306
	240	-1.83883	0.679588	0.0182248	0.340903
	242	-1.98133	0.639999	-0.0655395	0.530412
	244	-1.85879	0.464999	-0.207636	0.565745
	246	-1.9837	0.338909	-0.321576	0.431559
	248	-2.10353	0.398284	0.0430757	0.450106
	250	-2.44278	0.250098	-0.0229358	0.422778
	252	-2.26146	0.211467	0.0971165	0.400812
	254	-2.4223	0.411396	0.111992	0.536899
	256	-2.72708	0.494689	-0.0167043	0.617774
	258	-2.26937	0.375992	0.0669958	0.649557
	260	-2.0993	0.480873	-0.323725	0.674048
	262	-1.95489	0.590582	-0.281528	0.623187
	264	-1.57863	0.523584	-0.285636	0.610684
	266	-1.41575	0.502055	-0.37243	0.479842
	268	-1.89914	0.603905	-0.430105	0.416092
	270	-1.85665	0.55146	-0.513913	0.363343
	272	-2.34621	0.724645	-0.618065	0.388168
	274	-2.79951	0.703091	-0.954079	0.402416
	276	-2.72851	0.644896	-0.276874	0.490271
	278	-2.44502	0.695183	-0.304708	0.47248
	280	-2.50019	0.662352	-0.171487	0.514443
	282	-2.16502	0.48888	-0.123795	0.578691
	284	-2.17025	0.555041	0.218631	0.35842
	286	-2.19508	0.514882	-0.268967	0.443558
	288	-2.50751	0.63764	-0.362725	0.593736
	290	-2.58018	0.73356	-0.444849	0.612313
	292	-2.67354	0.699221	-0.640419	0.569748
	294	-2.56642	0.620048	-0.273009	0.551649
	296	-2.72748	0.654569	-0.25028	0.605109
	298	-2.81367	0.624275	-0.473801	0.508553
	300	-2.70569	0.565816	-0.492647	0.43776
	302	-2.80282	0.594233	-0.330881	0.453297
	304	-2.70304	0.688574	-0.178716	0.519965
	306	-2.29199	0.729944	-0.586988	0.385735
	308	-2.47747	0.810815	-0.295257	0.392054
	310	-2.86115	0.743768	-0.586621	0.556438
	312	-3.05638	0.745685	-0.848064	0.535166
	314	-3.15171	0.758473	-0.782948	0.672968
	316	-2.91662	0.791372	-0.607574	0.636614
	318	-2.86355	0.750458	-0.561663	0.692554
	320	-2.69684	0.73116	-0.756023	0.618422
	322	-2.68336	0.744157	-0.508364	0.5728
	324	-2.97658	0.86108	-0.612135	0.582913
	326	-3.11284	0.876016	-0.613385	0.70419
	328	-3.22365	0.82878	-0.769148	0.689084
	330	-3.31768	0.785225	-1.05195	0.644623
	332	-3.07183	0.440406	-1.02012	0.719932
	334	-3.14746	0.572436	-1.10705	0.420164
	336	-3.31996	0.579057	-0.978518	0.392175
	338	-3.60572	0.710024	-0.818709	0.466078
	340	-3.07658	0.543618	-0.909854	0.616106
	342	-2.68017	0.211979	-0.828599	0.638933
	344	-2.90728	0.564007	-0.730206	0.678879
	346	-2.66592	0.629599	-0.620898	0.602098
	348	-2.27839	0.319918	-0.557823	0.592086
	350	-2.71384	0.368045	-0.45253	0.600025
	352	-2.95443	0.586566	-0.455792	0.433801
	354	-2.95535	0.588679	-0.681452	0.568252
	356	-3.06455	0.489789	-0.563672	0.516321
	358	-3.2594	0.598486	-0.599951	0.453479
	360	-3.75541	0.82796	-0.917938	0.388896
	362	-3.52638	0.684381	-0.737823	0.544155
	364	-3.21171	0.832884	-0.85016	0.415865
	366	-3.31653	0.805784	-0.902083	0.462751
	368	-3.33537	0.784602	-1.15881	0.568024
	370	-2.82789	0.580321	-0.941494	0.61813
	372	-2.82156	0.47409	-0.988733	0.668322
	374	-3.46288	0.554737	-1.34017	0.769706
	376	-3.16328	0.351215	-0.942292	0.516358
	378	-3.21647	0.356648	-1.07669	0.629441
	380	-2.83375	0.368824	-0.998981	0.645819
	382	-2.75132	0.454556	-1.0783	0.541157
	384	-3.04969	0.744692	-1.09829	0.507126
	386	-2.69281	0.511788	-0.941501	0.437355
	388	-2.92102	0.572947	-0.97601	0.407556
	390	-3.14933	0.494796	-1.14326	0.395109
	392	-3.1897	0.497892	-0.910146	0.377963
	394	-3.31275	0.705952	-1.03883	0.564068
	396	-3.55975	0.764281	-0.986484	0.657897
	398	-3.75703	0.674264	-0.562503	0.648585
	400	-3.66896	0.763271	-0.617704	0.636922
	402	-4.25796	0.575069	-0.550882	0.703063
	404	-4.40362	0.631509	-0.54295	0.543153
	406	-4.062	0.671265	-0.591693	0.578711
	408	-3.50724	0.659463	-0.783478	0.610846
	410	-3.50846	0.60452	-0.978272	0.57163
	412	-3.05118	0.526421	-1.15769	0.671501
	414	-3.21504	0.455491	-1.01277	0.671225
	416	-3.22451	0.657043	-0.93144	0.576978
	418	-3.17718	0.808525	-1.30005	0.638851
	420	-3.22662	0.845806	-1.44713	0.541828
	422	-3.32278	0.879315	-1.37348	0.55388
	424	-3.28273	0.789679	-1.49677	0.658819
	426	-3.35521	0.746549	-1.19295	0.725881
	428	-3.69955	0.718427	-0.834019	0.685593
	430	-3.18975	0.396472	-0.859441	0.697859
	432	-3.05482	0.321924	-1.04325	0.662014
	434	-3.28901	0.323031	-1.12151	0.805351
	436	-2.86829	0.547134	-1.20126	0.848541
	438	-2.95251	0.410925	-1.4611	0.922013
	440	-3.20498	0.621141	-1.34614	0.794158
	442	-2.99444	0.762513	-1.43092	0.735993
	444	-2.95405	0.633065	-1.09742	0.700835
	446	-2.6618	0.513839	-0.845204	0.80535
	448	-3.2893	0.680151	-0.961457	0.686309
	450	-3.10431	0.615025	-1.01446	0.720509
	452	-3.5199	0.859634	-1.24051	0.673904
	454	-3.8968	0.938912	-1.39572	0.653577
	456	-4.06578	0.895302	-1.29744	0.641028
	458	-3.89945	0.890728	-1.46946	0.567069
	460	-3.83534	0.702031	-1.00316	0.683173
	462	-3.8274	0.593815	-0.866455	0.643317
	464	-3.57255	0.592649	-1.00262	0.728825
	466	-4.08552	0.7173	-1.04726	0.883595
	468	-4.04735	0.65971	-1.22362	0.833177
	470	-3.93763	0.683039	-1.55878	0.725676
	472	-3.37256	0.378411	-1.55302	0.71555
	474	-3.26661	0.429929	-1.63063	0.669328
	476	-3.26996	0.532946	-1.75252	0.594017
	478	-3.47613	0.276925	-1.64218	0.662653
	480	-3.17781	0.471999	-1.50968	0.677384
	482	-3.36051	0.627183	-1.39806	0.749043
	484	-3.42373	0.416643	-1.12765	0.657781
	486	-3.75364	0.364425	-1.10668	0.776922
	488	-3.92791	0.361822	-1.04666	0.786893
	490	-4.14294	0.351915	-1.17982	0.667327
	492	-3.95353	0.41613	-0.833259	0.628457
	494	-3.81224	0.566084	-1.02606	0.760091
	496	-3.50307	0.751748	-1.2621	0.718871
	498	-3.79597	0.879782	-1.41729	0.516231
	500	-3.74055	0.927812	-1.34782	0.595497
	502	-4.02117	0.864489	-1.63882	0.586688
	504	-3.99605	0.863381	-1.41378	0.542617
	506	-4.02356	0.876928	-1.1507	0.706305
	508	-4.19764	0.797058	-1.00409	0.64181
	510	-4.14364	0.811918	-1.15599	0.764661
	512	-4.21415	0.859179	-1.24441	0.746065
	514	-4.02708	0.917429	-1.28545	0.784494
	516	-4.15539	0.919659	-1.33807	0.62535
	518	-4.14433	1.11943	-1.60773	0.946306
	520	-4.02414	1.19484	-1.36283	0.934297
	522	-4.0154	1.02758	-1.4519	0.841643
	524	-4.01263	1.00928	-1.75428	0.883144
	526	-4.03406	1.22361	-1.55734	0.821365
	528	-4.15258	1.12149	-1.61494	0.603551
	530	-4.0799	1.1157	-1.52947	0.503201
	532	-4.19592	1.01725	-1.6447	0.572144
	534	-4.14554	0.89437	-1.39072	0.397407
	536	-3.89216	0.777303	-1.2282	0.477521
	538	-3.47098	0.836788	-1.31904	0.575748
	540	-3.87082	0.877607	-1.34373	0.59826
	542	-3.76702	0.833149	-1.59182	0.519705
	544	-4.14577	0.760236	-1.67098	0.540736
	546	-4.10754	0.940221	-1.34711	0.437913
	548	-4.2665	0.873792	-1.32412	0.465948
	550	-4.06228	0.829567	-1.50151	0.590975
	552	-3.883	0.894112	-1.458	0.578161
	554	-3.81076	0.890586	-1.31964	0.613032
	556	-4.09358	0.972284	-1.39263	0.587624
	558	-4.15531	0.889307	-1.39518	0.591515
	560	-3.98807	1.03287	-1.44773	0.632018
	562	-4.46012	0.808293	-1.16327	0.597194
	564	-4.48444	0.614248	-1.36482	0.744985
	566	-4.16909	0.751477	-1.06061	0.827425
	568	-4.21388	0.766313	-1.18151	0.792699
	570	-4.23946	0.724461	-1.00372	0.791116
	572	-3.9621	0.664794	-1.4288	0.65912
	574	-3.87035	0.673868	-1.09665	0.808046
	576	-3.71022	0.598059	-1.43943	0.89496
	578	-3.52731	0.644135	-1.37514	0.801082
	580	-3.69067	0.804485	-1.36638	0.827878
	582	-3.65803	0.816699	-1.46427	0.786184
	584	-3.73682	0.813865	-1.51776	0.751192
	586	-3.98332	0.700567	-1.69571	0.641547
	588	-3.72399	0.504394	-1.67808	0.651645
	590	-3.79245	0.394122	-1.85083	0.701278
	592	-3.52549	0.468904	-1.44694	0.540338
	594	-3.5508	0.507644	-1.53467	0.519299
	596	-3.7782	0.643674	-1.51122	0.652937
	598	-4.1066	0.701868	-1.5257	0.589518
	600	-4.27882	0.851803	-1.29836	0.54567
	602	-4.547	0.995663	-1.40299	0.565452
	604	-4.67061	0.972536	-1.62045	0.771577
	606	-4.54297	0.943639	-1.82736	0.707586
	608	-4.20378	0.888039	-1.69037	0.7444
	610	-4.04398	0.838652	-1.63193	0.650903
	612	-3.61202	0.709798	-1.71689	0.616013
	614	-3.76323	0.70073	-1.72563	0.621089
	616	-4.07481	0.850662	-1.64806	0.623607
	618	-3.68801	0.578892	-1.5	0.662417
	620	-3.86157	1.0469	-1.6344	0.660792
	622	-4.07495	1.10383	-1.72377	0.655241
	624	-4.73389	0.9649	-1.54257	0.624299
	626	-4.2479	0.880876	-1.38285	0.563025
	628	-3.96741	0.958218	-1.532	0.668996
	630	-3.90068	0.711678	-1.52959	0.611059
	632	-3.77142	0.728071	-1.73906	0.74205
	634	-3.27489	0.787763	-1.90922	0.850421
	636	-3.44627	0.577439	-1.95425	0.857261
	638	-3.68171	0.630855	-1.84237	0.953318
	640	-3.65681	0.634925	-1.63522	1.02253
	642	-3.83613	0.696245	-1.34374	0.988582
	644	-3.9997	0.620123	-1.11092	0.809855
	646	-4.33414	0.801182	-1.197	0.855433
	648	-4.41865	0.847582	-1.12329	0.880719
	650	-4.61792	0.988554	-1.24835	0.836877
	652	-4.49352	1.02604	-1.52137	0.704469
	654	-4.40552	1.00207	-1.66915	0.763768
	656	-4.31182	0.955774	-1.54501	0.687639
	658	-4.48972	0.746159	-1.30407	0.600858
	660	-4.5866	0.778738	-1.62348	0.687604
	662	-4.79404	0.895501	-1.259	0.699043
	664	-4.90519	0.78472	-1.63147	0.670329
	666	-4.72254	0.597195	-1.46672	0.716157
	668	-5.02973	0.739773	-1.95833	0.969971
	670	-4.5088	0.624202	-1.70815	0.757625
	672	-4.6612	0.580234	-2.09236	0.957725
	674	-4.48597	0.709747	-2.04691	0.975821
	676	-4.01425	0.805462	-2.21179	1.01142
	678	-3.8982	0.737003	-1.50159	0.876411
	680	-3.9291	0.8999	-1.63829	0.827625
	682	-4.1904	0.857604	-1.53555	0.814394
	684	-4.19661	0.826744	-1.53219	0.713567
	686	-4.25391	0.780805	-1.69785	0.682738
	688	-4.80835	0.983926	-1.94516	0.614231
	690	-4.70636	0.778906	-2.07105	0.718131
	692	-4.34716	0.710989	-1.9986	0.745198
	694	-4.31495	0.473109	-1.81413	0.78678
	696	-4.4692	0.527497	-1.80796	0.763794
	698	-3.96439	0.756814	-1.86108	0.732097
	700	-4.18249	0.657401	-1.63771	0.670398
	702	-4.68736	0.703087	-1.46769	0.717829
	704	-4.81224	0.917827	-1.37827	0.716467
	706	-4.71531	0.696179	-1.4447	0.785562
	708	-5.17688	0.752796	-1.4614	0.750338
	710	-4.84364	0.847334	-1.5692	0.76928
	712	-4.99408	0.946588	-1.57007	0.657157
	714	-5.11618	0.975747	-1.57689	0.736851
	716	-4.7152	0.867211	-1.54864	0.731525
	718	-4.75667	0.774654	-1.61197	0.85297
	720	-4.87677	0.755145	-1.74278	0.963977
	722	-4.79625	0.763367	-1.91845	0.865538
	724	-4.6801	0.712518	-1.81358	0.842527
	726	-4.7697	0.829371	-1.99954	0.799785
	728	-4.69441	0.770982	-1.8029	0.698315
	730	-4.22853	0.509691	-1.76307	0.757456
	732	-3.36601	0.53238	-1.63236	0.750087
	734	-3.61579	0.492571	-1.73279	0.772331
	736	-3.79176	0.418391	-1.29127	0.824354
	738	-3.99379	0.431701	-1.29839	0.832403
	740	-4.08205	0.521358	-1.61313	0.843426
	742	-4.17013	0.640619	-1.79193	0.826893
	744	-4.68368	0.70675	-1.86418	0.810477
	746	-4.89602	0.82784	-2.02234	0.916359
	748	-4.37442	0.575168	-2.13151	0.967902
	750	-4.46487	0.513808	-2.01434	0.832935
	752	-4.46156	0.482381	-1.91773	0.882163
	754	-4.53989	0.501261	-2.18838	1.04086
	756	-4.44708	0.474376	-1.63784	0.749055
	758	-4.6046	0.552016	-1.7202	0.764714
	760	-4.69404	0.54706	-1.69092	0.72472
	762	-4.96494	0.477234	-1.55655	0.775577
	764	-4.80878	0.583997	-1.55898	0.787073
	766	-4.783	0.495264	-1.76184	0.944186
	768	-4.31413	0.60853	-2.39829	0.979852
	770	-4.37651	0.559941	-2.371	1.02282
	772	-3.77281	0.746079	-2.25494	1.06195
	774	-4.17146	0.474963	-1.95687	1.16572
	776	-4.13017	0.535361	-2.02075	1.10611
	778	-4.19803	0.454568	-1.70922	1.02542
	780	-4.55053	0.523084	-1.49642	1.07975
	782	-4.82013	0.576038	-1.56707	1.02674
	784	-4.83439	0.586281	-1.52761	0.99897
	786	-4.57826	0.492752	-1.68521	0.870225
	788	-4.68813	0.629933	-2.16017	0.8119
	790	-4.2542	0.446265	-2.18327	0.770721
	792	-4.25087	0.48384	-1.8533	0.772996
	794	-4.04231	0.592992	-1.99577	0.725918
	796	-4.08243	0.48386	-1.78522	0.835288
	798	-4.36594	0.393413	-1.56729	0.888868
	800	-5.23647	0.804224	-1.70014	1.00838
	802	-5.36924	0.875988	-1.64581	0.989561
	804	-5.21301	0.916987	-1.75443	0.813526
	806	-5.08645	1.03395	-1.73253	0.783315
	808	-4.51594	0.919165	-1.69336	0.786424
	810	-4.37579	0.709948	-1.86556	0.788855
	812	-4.33657	0.68551	-1.94517	0.946553
	814	-4.77317	0.642748	-1.73094	0.919457
	816	-4.93849	0.620255	-1.82819	0.989304
	818	-5.31335	0.716805	-1.69832	0.922262
	820	-5.73943	0.904617	-1.61715	0.844266
	822	-5.69657	0.796567	-1.3746	0.790435
	824	-5.73264	0.697149	-1.66078	0.918974
	826	-5.14338	0.553418	-1.43744	0.868045
	828	-5.32008	1.07525	-1.6242	0.957281
	830	-5.09905	0.495678	-1.83209	0.957308
	832	-4.82437	0.657352	-1.8716	0.945779
	834	-4.3447	0.671589	-1.87312	0.917102
	836	-4.7624	0.766112	-1.85017	0.866616
	838	-4.89724	0.803265	-1.88255	0.902625
	840	-4.82731	0.79296	-1.57874	1.04261
	842	-4.91715	0.743718	-1.52417	1.02525
	844	-5.14913	0.897562	-1.57013	0.984747
	846	-4.92183	0.957682	-1.62856	0.969136
	848	-4.71933	0.842583	-1.81703	1.00608
	850	-4.90928	0.756328	-2.06955	0.898852
	852	-5.1906	0.811921	-1.90708	0.865158
	854	-5.15345	0.741443	-1.77824	0.956393
	856	-4.99039	0.8637	-1.97406	1.00883
	858	-5.33411	0.773559	-1.95175	0.979202
	860	-5.05664	0.797245	-2.33385	1.12825
	862	-4.75377	0.623572	-2.36239	1.11624
	864	-4.71441	0.615464	-2.30113	0.960004
	866	-4.73885	0.669239	-2.33869	1.01256
	868	-4.62413	0.75973	-2.08106	0.937033
	870	-4.89079	0.659409	-1.66255	0.893971
	872	-4.59037	0.621275	-1.95617	0.892269
	874	-4.9868	0.774463	-2.07321	0.996601
	876	-4.83259	0.858165	-1.7405	0.91944
	878	-4.92184	0.575083	-2.17382	0.868768
	880	-5.19112	0.780815	-2.49558	0.842198
	882	-5.14886	0.776558	-2.60428	0.985051
	884	-4.98071	0.738126	-2.39518	1.00104
	886	-4.75382	0.619003	-2.30727	0.863612
	888	-5.37796	0.911445	-2.20204	0.880517
	890	-5.18033	0.758357	-2.10088	0.949333
	892	-5.04565	0.739354	-2.00897	0.933027
	894	-5.06782	0.81887	-2.05834	0.97629
	896	-5.37984	0.930416	-2.17683	1.04015
	898	-5.24745	0.943774	-2.08362	0.902027
	900	-5.51831	1.04459	-2.35768	0.934631
	902	-5.48528	0.987698	-2.29458	1.00349
	904	-5.14467	0.602924	-2.21208	1.03479
	906	-5.01126	0.41971	-2.48498	1.07687
	908	-5.30303	0.439103	-2.57437	1.02623
	910	-5.57379	0.475664	-2.46082	0.97206
	912	-5.07349	0.924903	-2.16531	0.971119
	914	-4.72552	1.10992	-2.04692	0.861736
	916	-4.56284	0.872208	-1.96801	0.873958
	918	-4.64193	1.03639	-2.00469	0.998952
	920	-4.57628	1.00958	-2.18976	1.11617
	922	-4.68645	0.858362	-2.21745	0.961564
	924	-5.15057	0.984198	-2.15422	0.966806
	926	-4.96998	0.965756	-1.98451	1.00524
	928	-5.30387	0.81864	-2.24149	0.914805
	930	-4.62065	0.64269	-2.48538	0.831183
	932	-5.03748	0.683838	-2.2355	0.849722
	934	-4.83557	0.448432	-2.42603	0.969206
	936	-5.08186	0.617877	-2.30165	1.03527
	938	-4.98229	0.70618	-2.29263	0.965343
	940	-5.26421	0.686324	-2.36346	0.962027
	942	-5.03382	0.468101	-2.06329	1.07359
	944	-5.20471	0.493517	-1.92663	1.09705
	946	-4.95926	0.462255	-2.15364	1.02984
	948	-4.98526	0.365079	-1.99347	1.02762
	950	-4.79714	0.434574	-1.77413	1.04515
	952	-4.58039	0.564392	-1.92793	1.08877
	954	-4.5782	0.477943	-1.65615	1.08897
	956	-5.27805	0.419449	-2.18004	1.09424
	958	-6.33686	0.665712	-3.21508	0.953682

## Sheet: Fig.S1d
	Time traces						δCKAR response
		Control (DMSO)		BisIV			Control (DMSO)	BisIV
	Time (s)	Mean	SEM	Mean	SEM		-1.3722	-4.99195
	0	-0.854199	0.313568	-1.49587	0.402782		0.18601	-4.60925
	2	-0.0614145	0.229251	-0.324464	0.279988		0.28097	-3.05655
	4	0.378238	0.167682	-0.0453438	0.291204		-1.13973	-2.4197
	6	0.369143	0.173162	0.234341	0.213983		0.143505	-3.0582
	8	0.112964	0.252332	0.249648	0.240899		-0.204844	-2.5468
	10	0.221083	0.305428	0.251622	0.274499
	12	0.229059	0.29466	0.258177	0.163441
	14	-0.0918192	0.232561	0.103616	0.0785211
	16	-0.123748	0.237234	-0.175293	0.150998
	18	0.122783	0.265882	-0.0439426	0.225386
	20	-0.0141025	0.21221	-0.19669	0.25724
	22	-0.184673	0.283418	-0.153591	0.236976
	24	0.181716	0.197675	0.155816	0.127741
	26	0.258537	0.249472	0.22042	0.119904
	28	0.154955	0.0856271	0.0601659	0.158332
	30	0.282929	0.229826	0.105002	0.252556
	32	0.576013	0.401157	0.178069	0.234128
	34	0.137351	0.122233	0.0498193	0.275265
	36	0.178991	0.139777	-0.0321156	0.242926
	38	-0.0373756	0.236688	-0.174665	0.172612
	40	0.300538	0.261358	-0.185775	0.204851
	42	0.105871	0.250852	-0.00365097	0.227387
	44	0.345314	0.182515	-0.0779541	0.190193
	46	0.293381	0.230739	-0.00535042	0.193535
	48	0.238386	0.125717	0.110854	0.196464
	50	0.353629	0.119072	0.107804	0.271747
	52	0.11559	0.236467	0.145393	0.220119
	54	-0.197798	0.199453	0.271853	0.211274
	56	-0.0372432	0.297817	0.0817195	0.180171
	58	-0.168146	0.157571	0.153255	0.124892
	60	-0.252107	0.187621	0.219052	0.220562
	62	0.259319	0.141485	0.253954	0.234543
	64	-0.137246	0.252075	0.266521	0.22132
	66	-0.260411	0.32899	0.219768	0.285747
	68	-0.108704	0.229892	0.294558	0.161739
	70	-0.0019413	0.220183	0.0949133	0.248358
	72	-0.110748	0.25097	-0.00980916	0.210584
	74	0.0497262	0.260411	-0.160145	0.167604
	76	0.0524956	0.266018	-0.239529	0.201991
	78	0.0184938	0.261391	-0.150596	0.253566
	80	0.031064	0.238404	-0.0298174	0.0955809
	82	-0.19298	0.29627	0.0440763	0.117919
	84	-0.232603	0.208794	0.197575	0.213482
	86	-0.0219587	0.220021	0.179295	0.10169
	88	-0.0532101	0.129424	0.118275	0.19422
	90	-0.182928	0.275989	0.124586	0.15602
	92	-0.122945	0.310112	-0.0212072	0.13619
	94	0.0137464	0.334287	-0.101732	0.0507788
	96	-0.107316	0.362383	-0.183668	0.215512
	98	-0.26685	0.326408	0.120965	0.150149
	100	-0.288941	0.27755	-0.0182716	0.163826
	102	-0.249234	0.241779	-0.0052426	0.188925
	104	-0.170255	0.229498	0.0318476	0.240066
	106	-0.226047	0.155585	-0.140007	0.14966
	108	0.0881981	0.0780353	-0.0831962	0.166277
	110	0.0810996	0.07157	-0.317153	0.272426
	112	-0.00222083	0.108071	-0.274269	0.230356
	114	-0.339818	0.14617	-0.313804	0.201704
	116	-0.444266	0.131523	-0.612366	0.194413
	118	-0.796572	0.398128	-0.90224	0.301449
	120	-0.960667	0.470261	-1.90046	0.658891
	122	-1.23547	0.512724	-2.37413	0.4441
	124	-0.778611	0.422257	-2.90637	0.290186
	126	-0.489303	0.391089	-2.7951	0.145434
	128	-0.430375	0.268136	-2.31201	0.345921
	130	-0.292323	0.285395	-2.16925	0.278813
	132	-0.178132	0.325343	-2.28614	0.30325
	134	-0.253723	0.403389	-2.27138	0.306456
	136	-0.142831	0.341944	-2.30978	0.394005
	138	-0.250874	0.440349	-2.05473	0.353468
	140	-0.154662	0.525047	-1.8424	0.303788
	142	-0.218658	0.450462	-2.03239	0.254905
	144	-0.0283895	0.457232	-2.09294	0.183095
	146	-0.0336964	0.54805	-2.16825	0.230677
	148	0.015603	0.446001	-2.14572	0.192085
	150	-0.00388658	0.394585	-2.2309	0.177911
	152	0.206638	0.319177	-2.30939	0.197667
	154	0.184196	0.341454	-2.24621	0.221273
	156	0.23089	0.31059	-2.2679	0.180688
	158	0.1986	0.262075	-2.17012	0.221724
	160	0.114523	0.253434	-2.10362	0.33457
	162	0.0562857	0.403369	-2.15879	0.266921
	164	0.0850963	0.259073	-2.30528	0.303309
	166	0.17872	0.312123	-1.96588	0.44942
	168	0.0737649	0.486666	-2.1625	0.433833
	170	0.105767	0.434461	-1.88397	0.300901
	172	0.309651	0.393807	-2.01069	0.187163
	174	0.31269	0.369116	-2.12244	0.194719
	176	0.280335	0.22904	-2.15978	0.286693
	178	0.323405	0.18669	-1.86724	0.382196
	180	0.145058	0.332431	-1.98118	0.423237
	182	0.0597277	0.314127	-2.09838	0.488408
	184	-0.0501114	0.325714	-2.04059	0.315062
	186	0.000592197	0.411831	-2.00729	0.351709
	188	0.0763333	0.292299	-2.13542	0.294826
	190	-0.169771	0.283736	-1.99873	0.220818
	192	0.133043	0.278413	-2.0034	0.226319
	194	0.0366662	0.256884	-1.98803	0.270244
	196	0.179908	0.239863	-1.97552	0.24776
	198	0.0320743	0.31153	-2.0326	0.267203
	200	0.141683	0.419532	-2.04812	0.299084
	202	0.142585	0.384337	-2.3036	0.269668
	204	0.186433	0.323168	-2.43105	0.266815
	206	0.316548	0.307544	-2.56918	0.182631
	208	0.385115	0.262799	-2.64982	0.219379
	210	0.324179	0.286436	-2.45384	0.266754
	212	0.356903	0.453869	-2.33344	0.261981
	214	0.301566	0.452938	-2.14579	0.306623
	216	0.140095	0.490334	-1.95898	0.452445
	218	0.126006	0.480039	-1.97328	0.374221
	220	-0.0499506	0.350277	-1.9702	0.406565
	222	-0.000298636	0.371633	-1.94369	0.304316
	224	0.159658	0.389329	-1.79933	0.322768
	226	0.0719406	0.363642	-2.00126	0.326173
	228	0.216652	0.307131	-1.90014	0.297943
	230	0.351933	0.254754	-1.91341	0.281777
	232	0.433856	0.216058	-1.99396	0.436679
	234	0.428546	0.184958	-1.61856	0.302731
	236	0.401902	0.268318	-1.76102	0.250628
	238	0.206199	0.266619	-2.00657	0.329898
	240	0.478113	0.335536	-2.12303	0.343107
	242	0.368235	0.386869	-2.13296	0.279809
	244	0.343827	0.475238	-2.32786	0.265121
	246	0.266485	0.352318	-2.39485	0.278795
	248	0.22811	0.232647	-2.38591	0.327167
	250	0.0874446	0.409142	-2.27389	0.359504
	252	0.401355	0.334825	-2.43142	0.250934
	254	0.467064	0.398032	-2.42115	0.339579
	256	0.417549	0.33684	-2.44176	0.382488
	258	0.477579	0.334096	-2.38492	0.516287
	260	0.471166	0.378034	-2.33935	0.505273
	262	0.401532	0.366024	-2.22602	0.52967
	264	0.463069	0.352604	-1.9503	0.502138
	266	0.33494	0.400154	-1.73425	0.402927
	268	0.387467	0.39709	-1.34806	0.440102
	270	-0.026534	0.493707	-1.29945	0.305192
	272	-0.0178898	0.439005	-1.52056	0.393559
	274	-0.205207	0.45049	-2.04687	0.493882
	276	-0.00207124	0.396792	-2.12717	0.531817
	278	0.120515	0.470722	-2.43727	0.560093
	280	0.18615	0.288401	-2.38346	0.527119
	282	0.153348	0.274666	-2.3833	0.53657
	284	0.0418559	0.282162	-2.22002	0.36646
	286	0.0519002	0.324404	-2.11373	0.475206
	288	-0.0526321	0.350289	-2.06798	0.453074
	290	-0.0385529	0.358046	-2.08083	0.538527
	292	0.183735	0.285394	-2.21662	0.396865
	294	0.112512	0.303754	-2.22998	0.492629
	296	0.127943	0.34475	-2.24604	0.477943
	298	0.236	0.194717	-2.77051	0.420135
	300	-0.0404549	0.284672	-2.65626	0.520101
	302	-0.0796709	0.267289	-2.4602	0.481917
	304	0.00684852	0.378448	-2.35887	0.49052
	306	0.112445	0.423233	-2.30519	0.444804
	308	0.132154	0.394181	-2.37947	0.424553
	310	0.100331	0.344473	-2.56656	0.36799
	312	0.118292	0.379255	-2.55008	0.347877
	314	0.159083	0.296284	-2.60675	0.358892
	316	0.149976	0.341048	-2.43611	0.497007
	318	0.044744	0.391332	-2.60512	0.437699
	320	0.189124	0.35158	-2.57221	0.514865
	322	0.15865	0.317738	-2.20428	0.507524
	324	0.188129	0.343825	-2.13099	0.471934
	326	0.162428	0.405454	-2.20102	0.47155
	328	0.246612	0.341179	-2.16963	0.520685
	330	-0.0563919	0.382121	-2.34131	0.394825
	332	-0.225274	0.317607	-2.22161	0.46012
	334	-0.141143	0.187142	-2.11531	0.352454
	336	0.00581797	0.204238	-2.24327	0.355322
	338	-0.290503	0.260257	-2.30123	0.395201
	340	-0.0899611	0.153219	-2.22112	0.375282
	342	-0.157314	0.358525	-2.2043	0.376467
	344	-0.145343	0.33582	-2.34864	0.369975
	346	-0.150892	0.143966	-2.52849	0.420494
	348	0.176833	0.146697	-2.45736	0.478722
	350	0.0934209	0.268734	-2.43858	0.505723
	352	0.222971	0.2018	-2.26552	0.402125
	354	0.25247	0.356092	-2.27475	0.395668
	356	0.440101	0.316766	-2.24226	0.346109
	358	0.11973	0.317736	-2.45253	0.339199
	360	0.339692	0.272691	-2.27329	0.382908
	362	0.0814586	0.25446	-2.55569	0.306009
	364	-0.0157138	0.228167	-2.495	0.452854
	366	0.111155	0.253391	-2.1977	0.410917
	368	0.0759541	0.247048	-2.33755	0.458594
	370	0.153136	0.306994	-2.45593	0.460037
	372	0.227259	0.373683	-2.36559	0.552581
	374	-0.19743	0.360936	-2.35121	0.456831
	376	-0.120703	0.273396	-2.38352	0.437978
	378	-0.158705	0.320559	-2.29491	0.374421
	380	-0.404021	0.345951	-2.33038	0.330076
	382	-0.259737	0.320142	-2.26545	0.333615
	384	0.0719343	0.290209	-2.18372	0.4002
	386	0.14305	0.308884	-2.10113	0.350679
	388	0.116441	0.275125	-2.1047	0.362486
	390	0.0554607	0.326101	-2.00579	0.485914
	392	-0.0662367	0.321426	-2.14243	0.439554
	394	-0.453546	0.286373	-2.22292	0.419159
	396	-0.395033	0.311092	-2.3759	0.386375
	398	-0.44001	0.298295	-2.55238	0.413473
	400	-0.448772	0.315985	-2.59874	0.366317
	402	-0.148423	0.314531	-2.59812	0.379737
	404	-0.203085	0.288287	-2.08384	0.353926
	406	-0.0555995	0.3148	-2.24405	0.404013
	408	-0.0522242	0.279831	-2.28833	0.489601
	410	0.157395	0.325202	-2.45574	0.4422
	412	-0.064143	0.373805	-2.64993	0.474187
	414	-0.0831291	0.321843	-2.75778	0.525242
	416	-0.180191	0.316558	-2.75711	0.583443
	418	-0.269962	0.295871	-2.47618	0.607728
	420	0.0418359	0.158348	-2.51057	0.570111
	422	-0.127628	0.154249	-2.34188	0.490547
	424	-0.084564	0.221577	-2.46084	0.536645
	426	0.10527	0.248781	-2.36053	0.412662
	428	0.0482093	0.330783	-2.64795	0.419098
	430	-0.195064	0.285034	-2.49144	0.276469
	432	-0.0722843	0.45498	-2.38138	0.399471
	434	-0.213177	0.561223	-2.46422	0.377437
	436	-0.107889	0.515441	-2.77364	0.283962
	438	-0.105503	0.459633	-2.71857	0.408921
	440	0.0106866	0.456781	-2.77205	0.459363
	442	0.146792	0.44967	-2.89103	0.382307
	444	0.293624	0.418383	-2.91432	0.328626
	446	0.165343	0.424468	-2.95551	0.41367
	448	0.0880781	0.325939	-2.78139	0.345478
	450	-0.0515109	0.427035	-2.71303	0.324088
	452	0.0928513	0.339291	-2.3834	0.435137
	454	-0.0575318	0.410395	-2.24046	0.406142
	456	-0.193915	0.407918	-2.15829	0.531535
	458	-0.351412	0.394996	-2.27064	0.568537
	460	-0.443543	0.367126	-2.45515	0.406935
	462	-0.628874	0.381767	-2.58564	0.460542
	464	-0.647177	0.347886	-2.59952	0.460781
	466	-0.308376	0.37955	-2.7045	0.511188
	468	-0.208707	0.390534	-2.60318	0.386613
	470	-0.183833	0.319896	-2.6062	0.439374
	472	0.033414	0.309176	-2.83618	0.381353
	474	-0.178291	0.181462	-2.83225	0.360047
	476	-0.218257	0.261709	-2.83355	0.360088
	478	-0.117203	0.357434	-2.80289	0.532342
	480	-0.2782	0.4522	-2.80478	0.435778
	482	-0.458937	0.387419	-2.69487	0.429583
	484	-0.174638	0.465626	-2.44969	0.49252
	486	-0.227005	0.466911	-2.45136	0.495152
	488	-0.351084	0.415905	-2.65608	0.406148
	490	-0.281786	0.333246	-2.67309	0.496127
	492	0.173477	0.321893	-2.79869	0.4704
	494	-0.0723458	0.319477	-3.19934	0.5046
	496	-0.0329959	0.339134	-3.09856	0.509742
	498	0.0485657	0.420116	-2.91155	0.529265
	500	0.164503	0.355277	-2.81822	0.526703
	502	-0.426118	0.414411	-2.98634	0.352039
	504	-0.0772427	0.331667	-2.61118	0.269224
	506	-0.480881	0.259745	-2.69282	0.23451
	508	-0.496352	0.296284	-2.51694	0.277921
	510	-0.505594	0.323755	-2.95821	0.344847
	512	-0.303147	0.310942	-2.80687	0.338761
	514	-0.367052	0.24566	-2.85367	0.35651
	516	-0.392322	0.427401	-2.70749	0.328293
	518	-0.224275	0.443118	-2.96765	0.346236
	520	-0.163385	0.472319	-2.74751	0.38975
	522	-0.211036	0.46952	-2.94478	0.345139
	524	-0.0215408	0.47365	-2.81483	0.332617
	526	0.0343373	0.416776	-2.92964	0.375517
	528	0.118859	0.435632	-2.72678	0.389304
	530	0.0590584	0.382367	-2.95765	0.385863
	532	-0.0312998	0.322295	-2.95669	0.400463
	534	0.145066	0.300404	-2.91251	0.539806
	536	0.165281	0.356263	-3.08552	0.479875
	538	0.0514725	0.378752	-2.95883	0.443641
	540	0.0285842	0.474034	-2.95234	0.508912
	542	-0.0409882	0.456661	-2.65499	0.417896
	544	-0.216986	0.444206	-3.03334	0.488025
	546	-0.209303	0.471374	-2.89984	0.354469
	548	-0.34892	0.352873	-2.94108	0.345209
	550	-0.217158	0.315954	-2.95281	0.380689
	552	-0.229821	0.360039	-3.0792	0.416602
	554	-0.274023	0.467617	-2.8743	0.386484
	556	-0.247605	0.390103	-3.08058	0.515956
	558	-0.169212	0.329946	-3.14919	0.475483
	560	-0.272594	0.349412	-3.09146	0.390533
	562	-0.00575642	0.304775	-3.05993	0.385142
	564	-0.225916	0.302923	-3.19074	0.299643
	566	-0.121526	0.257821	-3.10155	0.271393
	568	-0.0480846	0.314077	-3.14877	0.328635
	570	-0.160336	0.366889	-3.10703	0.339347
	572	-0.209498	0.319007	-2.98433	0.398812
	574	0.00873381	0.311181	-3.0923	0.502176
	576	0.0689405	0.296176	-3.04267	0.418329
	578	0.0584796	0.371151	-3.04272	0.612776
	580	0.0238206	0.297308	-2.96089	0.671706
	582	-0.0870177	0.407665	-2.89608	0.482623
	584	0.0399694	0.418192	-2.80837	0.514322
	586	-0.105113	0.484537	-3.05146	0.476289
	588	-0.299818	0.419166	-2.75402	0.481128
	590	-0.0876114	0.457104	-2.80439	0.425924
	592	-0.19335	0.373728	-3.10592	0.468652
	594	-0.235309	0.435104	-3.05152	0.434681
	596	0.0382831	0.277332	-3.07947	0.434125
	598	0.131526	0.275382	-3.10257	0.396603
	600	-0.077503	0.319493	-3.35485	0.391155
	602	0.160113	0.217775	-3.26874	0.396968
	604	0.118081	0.198543	-3.15531	0.616099
	606	0.347725	0.258458	-3.08862	0.672938
	608	0.163932	0.492135	-3.07779	0.608528
	610	0.262716	0.506549	-2.75927	0.476481
	612	0.0747394	0.581009	-2.83614	0.332923
	614	-0.0185163	0.478773	-2.76467	0.312957
	616	-0.102315	0.185762	-3.18347	0.469696
	618	0.288869	0.172974	-2.96807	0.497417
	620	-0.205524	0.300582	-2.99009	0.5553
	622	-0.225443	0.27731	-3.06269	0.503367
	624	-0.106793	0.261819	-3.18303	0.456818
	626	-0.322422	0.405654	-2.90712	0.421136
	628	-0.548744	0.265117	-3.04476	0.414782
	630	-0.461366	0.277263	-3.06836	0.424611
	632	-0.33933	0.274034	-2.97917	0.427352
	634	-0.513254	0.261298	-2.92383	0.549479
	636	-0.450179	0.269612	-3.07391	0.581161
	638	-0.212778	0.25954	-3.03069	0.571483
	640	-0.00969808	0.336095	-3.03739	0.581258
	642	-0.0256401	0.363526	-2.90535	0.585833
	644	-0.0691572	0.424186	-3.04997	0.438937
	646	0.165926	0.428277	-3.0255	0.408548
	648	-0.160429	0.432671	-3.12077	0.430338
	650	-0.0569973	0.478342	-3.09504	0.281773
	652	-0.121687	0.37511	-3.08009	0.289542
	654	-0.109141	0.36513	-2.9062	0.334734
	656	-0.187824	0.297558	-2.93198	0.42275
	658	-0.180145	0.331029	-2.83817	0.432009
	660	-0.22681	0.319791	-3.00519	0.525386
	662	-0.3704	0.255846	-2.93828	0.514187
	664	-0.488821	0.338922	-3.01813	0.480155
	666	-0.115965	0.47598	-2.97757	0.378902
	668	-0.189133	0.505891	-3.02099	0.37451
	670	-0.253503	0.484979	-3.27452	0.272286
	672	-0.101414	0.455334	-3.33011	0.249053
	674	-0.1399	0.362435	-3.39772	0.318141
	676	0.0912986	0.392604	-3.39166	0.351093
	678	0.183193	0.281397	-3.57245	0.42864
	680	-0.0935444	0.314452	-3.40956	0.459403
	682	-0.305022	0.318591	-3.17582	0.468338
	684	-0.28681	0.285611	-3.04577	0.497616
	686	-0.381513	0.277216	-3.11731	0.56494
	688	-0.462525	0.29614	-3.00457	0.597051
	690	-0.33365	0.330394	-3.11707	0.580363
	692	-0.486075	0.454352	-3.25207	0.592943
	694	-0.550192	0.471251	-3.25422	0.519099
	696	-0.743014	0.400475	-3.47944	0.355595
	698	-0.624669	0.289025	-3.43308	0.367174
	700	-0.591885	0.237855	-3.14195	0.346023
	702	-0.41792	0.176525	-2.81064	0.308653
	704	-0.368618	0.239367	-2.95428	0.35624
	706	-0.152997	0.216263	-2.98081	0.304712
	708	-0.143525	0.231616	-3.041	0.418974
	710	-0.194546	0.152587	-3.35921	0.319628
	712	-0.0549718	0.266785	-3.53806	0.487535
	714	-0.283287	0.231916	-3.45326	0.482831
	716	-0.275981	0.226953	-3.28007	0.547683
	718	-0.55235	0.353302	-3.15432	0.56031
	720	-0.657545	0.51206	-3.20617	0.587967
	722	-0.584917	0.466823	-3.36434	0.654988
	724	-0.702174	0.464568	-3.44003	0.648468
	726	-0.629636	0.46543	-3.55876	0.651297
	728	-0.59574	0.466798	-3.49665	0.611746
	730	-0.507077	0.468638	-3.39764	0.660831
	732	-0.378345	0.498255	-3.18499	0.576379
	734	-0.356478	0.525662	-3.40643	0.46654
	736	-0.406894	0.56971	-3.17441	0.398539
	738	-0.304451	0.540174	-3.40906	0.550405
	740	-0.310913	0.49398	-3.37642	0.549261
	742	-0.141401	0.604153	-3.7403	0.662219
	744	-0.172035	0.572388	-3.77818	0.530693
	746	-0.361839	0.505097	-3.7577	0.512747
	748	-0.284936	0.425784	-3.52576	0.430371
	750	-0.551569	0.456712	-3.66125	0.391943
	752	-0.457862	0.341087	-3.48576	0.384044
	754	-0.526358	0.332735	-3.39676	0.482113
	756	-0.521391	0.376337	-3.36044	0.38971
	758	-0.511375	0.382774	-3.472	0.25434
	760	-0.537651	0.344852	-3.5455	0.389864
	762	-0.372063	0.448378	-3.54711	0.380062
	764	-0.456129	0.450811	-3.33107	0.362054
	766	-0.424437	0.284418	-3.56714	0.528818
	768	-0.461887	0.41799	-3.24776	0.525173
	770	-0.485322	0.42906	-3.36433	0.4425
	772	-0.370539	0.341291	-3.51826	0.469631
	774	-0.350266	0.360484	-3.56634	0.429102
	776	-0.341838	0.374008	-3.6626	0.46815
	778	-0.364028	0.344818	-3.7765	0.495423
	780	-0.375728	0.445688	-3.56249	0.512012
	782	-0.572501	0.546613	-3.45852	0.469334
	784	-0.267239	0.403744	-3.25868	0.473627
	786	-0.248915	0.366474	-3.41659	0.339939
	788	-0.35299	0.398813	-3.29332	0.288084
	790	-0.410352	0.285455	-3.37068	0.360659
	792	-0.437784	0.30728	-3.30552	0.187692
	794	-0.745375	0.25928	-3.4935	0.354027
	796	-0.809899	0.211179	-3.77142	0.384829
	798	-0.692844	0.171016	-3.78165	0.372058
	800	-0.434858	0.210045	-3.8001	0.36998
	802	-0.345827	0.237378	-3.65384	0.509133
	804	-0.277657	0.24423	-3.18624	0.476994
	806	-0.336241	0.278834	-3.32633	0.524191
	808	-0.335772	0.418043	-3.196	0.557879
	810	-0.243894	0.422456	-3.15532	0.574507
	812	-0.599729	0.284723	-3.23379	0.462653
	814	-0.464556	0.308339	-3.42843	0.407016
	816	-0.278061	0.359565	-3.55298	0.425214
	818	-0.215903	0.336326	-3.19686	0.554657
	820	-0.447726	0.294771	-3.2896	0.648611
	822	-0.369232	0.419529	-3.2603	0.631968
	824	-0.218121	0.441756	-3.3409	0.744493
	826	-0.103229	0.457089	-3.0288	0.733053
	828	-0.162626	0.423582	-3.66837	0.561002
	830	0.0959598	0.430149	-3.77475	0.59869
	832	0.112977	0.40832	-3.76608	0.588127
	834	-0.364265	0.396429	-3.92309	0.491772
	836	-0.701569	0.44402	-3.81953	0.443494
	838	-0.308471	0.44184	-3.82552	0.398596
	840	-0.548889	0.391269	-3.55955	0.450984
	842	-0.465885	0.43686	-3.54304	0.447911
	844	-0.536048	0.343505	-3.43338	0.546174
	846	-0.280054	0.356899	-3.5733	0.630232
	848	-0.523512	0.404998	-3.81647	0.463918
	850	-0.40911	0.366712	-3.58413	0.474689
	852	-0.366792	0.256106	-3.69506	0.473818
	854	-0.447552	0.286862	-3.64863	0.489039
	856	-0.415071	0.34233	-3.58459	0.353497
	858	-0.497469	0.34168	-3.55332	0.454706
	860	-0.623028	0.349715	-3.67111	0.511349
	862	-0.467299	0.348577	-3.6494	0.529195
	864	-0.527272	0.335808	-3.74735	0.549817
	866	-0.446718	0.340995	-4.01994	0.638576
	868	-0.703418	0.375527	-4.05298	0.641764
	870	-0.438735	0.310797	-4.03264	0.653647
	872	-0.700673	0.335084	-4.21819	0.634762
	874	-0.593598	0.333571	-4.13347	0.676913
	876	-0.795264	0.341895	-3.96995	0.58874
	878	-0.761276	0.336573	-3.84309	0.593956
	880	-0.782409	0.367466	-3.59078	0.67357
	882	-0.613119	0.364829	-3.58169	0.678336
	884	-0.615053	0.34903	-3.71354	0.64681
	886	-0.690589	0.418919	-3.70011	0.637465
	888	-0.403871	0.429629	-3.4771	0.492415
	890	-0.476283	0.47583	-3.75592	0.412683
	892	-0.410902	0.400351	-3.67438	0.412561
	894	-0.245979	0.273796	-3.93055	0.440544
	896	-0.278547	0.284961	-3.87377	0.514778
	898	-0.336182	0.2313	-4.13915	0.592058
	900	-0.157156	0.36399	-3.67963	0.451752
	902	-0.435662	0.307286	-3.76699	0.392721
	904	-0.523178	0.379671	-3.7484	0.500688
	906	-0.227538	0.211584	-3.63011	0.434092
	908	-0.432121	0.276595	-4.11729	0.287951
	910	-0.591361	0.291808	-3.83098	0.446377
	912	-0.537631	0.245664	-3.8267	0.52329
	914	-0.826088	0.298555	-3.87477	0.579166
	916	-0.838921	0.315788	-3.83874	0.566992
	918	-0.603479	0.297739	-3.62333	0.528508
	920	-0.253372	0.344846	-3.58358	0.529928
	922	-0.368786	0.375303	-3.78233	0.460261
	924	-0.194942	0.372482	-3.67924	0.510776
	926	-0.309164	0.384974	-3.74392	0.621514
	928	-0.139593	0.293543	-3.75123	0.586134
	930	-0.610616	0.446375	-3.8707	0.558173
	932	-0.486796	0.38914	-3.90506	0.65599
	934	-0.464299	0.366095	-3.79187	0.59685
	936	-0.26467	0.39392	-3.7068	0.58789
	938	-0.363923	0.431933	-3.73022	0.556222
	940	-0.379387	0.416737	-3.80484	0.546168
	942	-0.494817	0.329291	-3.68748	0.552238
	944	-0.444644	0.20872	-3.66669	0.56176
	946	-0.358121	0.272137	-3.87735	0.470601
	948	-0.259208	0.31454	-3.58414	0.433038
	950	-0.125904	0.197746	-3.75067	0.283016
	952	-0.213587	0.302264	-3.72571	0.371473
	954	-0.0683525	0.315894	-3.58716	0.409223
	956	-0.333666	0.337408	-4.01174	0.552563
	958	-0.871853	0.315546	-4.66268	0.711721

## Sheet: Fig.S1e
	5x spaced					5x massed					1x
	tub-GAL80ts; VT30559-GAL4/+	tub-GAL80ts; VT30559-GAL4>UAS-Pyronic	tub-GAL80ts; VT30559-GAL4>UAS-cyto-δCKAR	tub-GAL80ts; VT30559-GAL4>UAS-mito-δCKAR		tub-GAL80ts; VT30559-GAL4/+	tub-GAL80ts; VT30559-GAL4>UAS-Pyronic	tub-GAL80ts; VT30559-GAL4>UAS-cyto-δCKAR	tub-GAL80ts; VT30559-GAL4>UAS-mito-δCKAR		tub-GAL80ts; VT30559-GAL4/+	tub-GAL80ts; VT30559-GAL4>UAS-Pyronic	tub-GAL80ts; VT30559-GAL4>UAS-cyto-δCKAR	tub-GAL80ts; VT30559-GAL4>UAS-mito-δCKAR
	0.36	0.34	0.37	0.29		0.32	0.48	0.39	0.33		0.42	0.65	0.28	0.5
	0.53	0.09	0.59	0.31		0.22	0.26	0.21	0.37		0.59	0.47	0.47	0.5
	0.08	0.33	0.13	0.32		0.19	0.38	0.29	0.54		0.47	0.38	0.31	0.38
	-0.02	0.11	0.27	0.38		0.45	0.48	0.38	0.06		0.4	0.6	0.43	0.65
	0.27	0.35	0.42	0.28		0.24	0.47	0.29	0.3		0.36	0.53	0.59	0.4
	0.43	0.26	0.39	0.57		0.25	0.26	0.25	0.59		0.6	0.27	0.45	0.47
	0.44	0.39	0.51	0.33		0.18	0.36	0.28	0.27		0.3	0.6	0.23	0.32
	0.25	0.49	0.44	0.28		0.24	0.54	0.37	0.16		0.53	0.47	0.46	0.48
	0.14	0.55	0.27	0.53		0.51	0.26	0.33	0.35		0.26	0.37	0.36	0.44
	0.33	0.48	0.25	0.04		0.4	0.41	0.36	0.34		0.58	0.49	0.42	0.32
	0.55	0.44	0.19	0.42		0.11	0.25	0.21	0.54		0.42	0.35	0.28	0.46
	0.69	0.53	0.32	0.23		0.36	0.23	0.26	0.21		0.35	0.41	0.35	0.43
	0.12	0.33	0.36	0.79		0.31	0.4	0.35	0.54		0.37	0.58	0.34	0.47
	0.55	0.34	0.29	0.46		0.2	0.3	0.26	0.41		0.38	0.25	0.5	0.4
