# Supplementary material for: PKCδ is an activator of neuronal mitochondrial metabolism that mediates the spacing effect on memory consolidation
Source: eLife. 2024 Oct 30;13:RP92085. doi: 10.7554/eLife.92085 (PMC11524582; doi:10.7554/eLife.92085)
Supplement: Figure 1—source data 1. [file elife-92085-fig1-data1.xlsx]

## Sheet: Fig.1a
	No graph displayed on Fig. 1a

## Sheet: Fig.1b
	tub-GAL80ts; VT30559-GAL4/+	tub-GAL80ts; VT30559-GAL4/UAS-PKCδ RNAi JF02991
	0.965826	0.808416
	0.9169	0.582301
	0.500425	0.322616
	0.918844	0.991642
	1.81239	0.560411
	0.660823	0.70336
	1.25905	0.674708
	1.00162	0.444456
	1.12255	0.557398
	1.24555	0.878703
	0.596026	0.593278

## Sheet: Fig.1c
	5x spaced				5x spaced no induction				5x massed				1x
	tub-GAL80ts; VT30559-GAL4/+	tub-GAL80ts; VT30559-GAL4>UAS-PKCδ RNAi JF02991	+/UAS-PKCδ RNAi JF02991		tub-GAL80ts; VT30559-GAL4/+	tub-GAL80ts; VT30559-GAL4>UAS-PKCδ RNAi JF02991	+/UAS-PKCδ RNAi JF02991		tub-GAL80ts; VT30559-GAL4/+	tub-GAL80ts; VT30559-GAL4>UAS-PKCδ RNAi JF02991	+/UAS-PKCδ RNAi JF02991		tub-GAL80ts; VT30559-GAL4/+	tub-GAL80ts; VT30559-GAL4>UAS-PKCδ RNAi JF02991	+/UAS-PKCδ RNAi JF02991
	0.22	0.02	0.25		0.4	0.28	0.41		0.26	0.06	0.17		0.86	0.53	0.69
	0.23	0.04	0.23		0.38	0.06	0.3		0.33	0.28	0.15		0.73	0.56	0.65
	0.2	0.27	0.23		0.41	0.23	0.32		0.61	0.48	0.32		0.59	0.79	0.88
	0.18	-0.2	0.58		0.28	0.18	0.3		0.24	0.32	0.17		0.42	0.32	0.54
	0.45	0.18	0.27		0.08	0.4	0.38		0.68	-0.02	0.56		0.51	0.38	0.56
	0.11	0.11	0.52		0.35	0.33	0.23		0.57	0.09	0.02		0.82	0.58	0.69
	0.33	0.16	0.23		0.21	0.13	0.19		0.09	0.49	0.36		0.43	0.58	0.56
	0.22	-0.1	0.38		0.29	0.12	0.35		-0.04	0.22	0.1		0.45	0.38	0.42
	0.52	-0.2	0.39		0.31	0.41	0.28		0.43	0.08	0.33		0.59	0.44	0.55
	0.33	0.21	0.37		0.38	0.28	0.08		0.24	0.15	0.52		0.51	0.35	0.68
	0.48	-0.04	0.43		0.3	0.27	0.58		0.19	0.07	0.19		0.4	0.77	0.54
	0.27	0.13	0.29		0.44	0.67	0.23		0.2	0.37	0.34		0.39	0.7	0.42
	0.5	0.25	0.51		0.01	0.33	0.35		0.28	0.42	0.22		0.73	0.51	0.61
	0.35	0.18	0.45		0.64	0.4	0.44			0.29			0.8	0.73	0.43
	0.45	0.1	0.46		0.13	0.09	0.3						0.59	0.52	0.49
	0.4	0.34	0.53		0.17	0.23							0.54	0.65	0.84
	0.42	0.46	0.4			0.2							0.77	0.59	0.49
	0.45	0.5											0.77	0.47	0.65
	0.26	0.35
		0.09
		0.12
		0.18
		0.23
		0.45
		0.3

## Sheet: Fig.1d
	Time traces						δCKAR response
		Control (DMSO)		PDBu			Control (DMSO)	PDBu
	Time (s)	Mean	SEM	Mean	SEM		3.5265	0.05226
	0	-1.14044	0.484646	-1.28326	0.54147		2.81475	0.238785
	2	-0.306141	0.257573	-0.439854	0.322755		2.99835	-0.074129
	4	0.155305	0.330485	-0.311534	0.338776		1.85315	0.67669
	6	0.110758	0.226929	-0.543735	0.276895		0.82329	-0.2213
	8	0.0768559	0.27229	-0.498019	0.196914		2.9586	-0.025609
	10	0.232964	0.17647	-0.399503	0.138533
	12	0.340427	0.157977	-0.328934	0.19824
	14	0.0825144	0.188337	-0.247534	0.168105
	16	0.271489	0.149633	-0.262579	0.194269
	18	0.367227	0.157874	0.0993573	0.16512
	20	-0.0585972	0.190628	0.0350997	0.103068
	22	-0.277893	0.074698	-0.326236	0.317319
	24	-0.00323986	0.204172	0.0280081	0.360821
	26	0.261303	0.212488	0.0702794	0.376714
	28	-0.0747528	0.170755	-0.0741377	0.364633
	30	0.309112	0.25097	0.125015	0.322301
	32	0.262806	0.191406	-0.0176443	0.168614
	34	0.265773	0.229195	0.0176136	0.176215
	36	0.0733219	0.2735	-0.11385	0.0962701
	38	0.00900614	0.206799	0.00868022	0.139882
	40	-0.105611	0.252395	-0.0289688	0.18917
	42	-0.370505	0.357825	0.0467152	0.248487
	44	-0.382549	0.379639	0.0044923	0.142758
	46	-0.24666	0.264011	-0.0483595	0.142198
	48	0.0901351	0.253694	0.0543071	0.0961845
	50	0.0902162	0.247307	0.000989795	0.258485
	52	-0.0753514	0.25413	-0.155215	0.197471
	54	0.389465	0.362855	-0.396322	0.358228
	56	0.0231708	0.171662	-0.811259	0.246315
	58	-0.157025	0.186072	-0.677192	0.208507
	60	-0.114884	0.239138	-0.349795	0.19292
	62	0.0200452	0.155038	0.0292243	0.148362
	64	-0.195499	0.178734	0.257775	0.241368
	66	0.0239845	0.123057	0.388957	0.262305
	68	-0.114894	0.284552	0.479715	0.230446
	70	0.0894639	0.177471	0.304661	0.274343
	72	0.221044	0.202812	0.393313	0.331874
	74	0.175707	0.190918	-0.119922	0.236963
	76	0.277835	0.268759	0.597822	0.343374
	78	0.270924	0.295151	0.363869	0.389411
	80	0.164926	0.211866	0.0571416	0.317984
	82	0.110071	0.17303	-0.00955241	0.243624
	84	0.222342	0.185551	-0.120198	0.133459
	86	0.314899	0.319145	0.128784	0.195548
	88	0.0401069	0.34724	0.0515205	0.168836
	90	-0.210995	0.283368	0.383513	0.211808
	92	-0.378764	0.220907	0.140577	0.197331
	94	-0.216997	0.170508	0.496436	0.378881
	96	-0.174277	0.2047	0.131764	0.26215
	98	-0.0712202	0.187679	0.2179	0.24572
	100	-0.169821	0.14174	0.247621	0.34333
	102	-0.169689	0.25949	0.333364	0.128591
	104	-0.000633789	0.34244	0.0669973	0.142131
	106	-0.349753	0.343086	0.210898	0.267785
	108	-0.164295	0.348519	0.150377	0.230077
	110	-0.226471	0.473988	0.101685	0.186243
	112	0.051618	0.425703	0.0534446	0.237171
	114	0.0271355	0.304749	0.223229	0.195795
	116	-0.0150509	0.292587	-0.0404739	0.329425
	118	-0.435433	0.350628	-0.0860704	0.344472
	120	-0.178112	0.37761	-0.0831406	0.419592
	122	-0.183139	0.355173	-0.245923	0.420075
	124	-0.388017	0.303826	-0.785141	0.444232
	126	-0.200991	0.268177	-0.611271	0.247696
	128	-0.343982	0.240496	-0.642351	0.288547
	130	-0.434758	0.199774	-0.53139	0.278617
	132	-0.622318	0.201459	-0.380222	0.22123
	134	-0.216673	0.257356	-0.275017	0.287578
	136	-0.127941	0.274566	0.244762	0.227316
	138	-0.0312309	0.288905	0.294554	0.353206
	140	-0.592022	0.423099	0.304996	0.332396
	142	-0.467322	0.383823	0.25996	0.375758
	144	-0.46892	0.451511	0.334441	0.293127
	146	-0.302348	0.402044	0.286663	0.299969
	148	-0.219623	0.194775	0.512	0.118318
	150	-0.22766	0.240334	0.379516	0.311665
	152	-0.373855	0.36872	0.0983312	0.306526
	154	-0.329484	0.373125	0.0702061	0.201589
	156	-0.216022	0.258096	0.0379742	0.222952
	158	-0.532828	0.333991	0.0417501	0.352674
	160	-0.256649	0.257036	0.463066	0.451443
	162	0.225885	0.390137	0.998921	0.414602
	164	0.231464	0.351315	0.89398	0.374754
	166	0.342159	0.295564	0.990991	0.21113
	168	0.388134	0.270333	0.984341	0.211678
	170	0.0462829	0.248396	0.922295	0.231461
	172	0.0441187	0.243286	0.726058	0.291391
	174	-0.206347	0.202361	0.956403	0.214373
	176	-0.340519	0.351671	0.911879	0.231532
	178	-0.104473	0.357956	1.11696	0.341448
	180	0.172221	0.228251	1.08773	0.331246
	182	-0.0247061	0.217041	1.18162	0.314575
	184	0.181801	0.142534	1.15622	0.340719
	186	0.181794	0.134785	1.28907	0.456687
	188	0.399843	0.10484	1.13068	0.384155
	190	0.404382	0.10935	1.29209	0.546073
	192	0.16952	0.210103	1.79569	0.452853
	194	0.212833	0.219346	1.21876	0.123815
	196	-0.186503	0.459451	1.38004	0.231149
	198	0.371052	0.218938	1.54429	0.315488
	200	-0.348923	0.443471	1.39843	0.311884
	202	0.162982	0.174302	1.27274	0.223039
	204	0.219584	0.143403	1.38856	0.211313
	206	0.52473	0.204438	1.25687	0.27139
	208	0.41498	0.181228	1.19936	0.264307
	210	0.266514	0.211148	1.44509	0.338834
	212	0.21786	0.193732	1.47845	0.368041
	214	-0.186895	0.139072	1.63771	0.339231
	216	-0.423181	0.175522	1.53282	0.330964
	218	-0.365942	0.182219	1.7724	0.306687
	220	-0.158843	0.145519	1.83477	0.356674
	222	-0.156656	0.134836	2.07737	0.215613
	224	-0.0935009	0.207853	2.3437	0.538218
	226	-0.246147	0.287069	2.47872	0.394444
	228	-0.261247	0.249237	2.11244	0.452343
	230	-0.27621	0.247954	1.86356	0.353234
	232	-0.479178	0.256431	1.76852	0.285219
	234	-0.490156	0.261684	1.68671	0.245171
	236	-0.26508	0.258575	1.71167	0.246089
	238	-0.270475	0.282626	1.82795	0.342111
	240	-0.199984	0.189663	1.94	0.339373
	242	-0.0520797	0.311333	2.14503	0.398188
	244	0.344199	0.297788	2.20633	0.349433
	246	0.0871785	0.296121	1.75873	0.43882
	248	0.430104	0.298995	2.15065	0.347575
	250	0.238402	0.246654	2.03079	0.356364
	252	0.159056	0.203056	2.06198	0.376955
	254	-0.140815	0.254342	2.597	0.407462
	256	0.338839	0.213964	2.25926	0.518927
	258	0.225633	0.218077	2.05179	0.459052
	260	0.12217	0.379557	2.00706	0.368032
	262	-0.173378	0.301156	2.29395	0.217294
	264	-0.272524	0.394911	2.1183	0.244321
	266	-0.418717	0.476131	2.04634	0.26995
	268	-0.348863	0.389428	2.14976	0.438889
	270	-0.326453	0.459814	2.44047	0.418169
	272	-0.576661	0.461185	2.40526	0.402507
	274	-0.15619	0.334333	2.25478	0.248612
	276	0.128593	0.179316	2.31669	0.209482
	278	0.076073	0.106458	2.13214	0.234444
	280	-0.108173	0.143414	1.97415	0.284949
	282	0.180871	0.122882	2.05318	0.294373
	284	-0.000122806	0.255352	2.09906	0.334975
	286	-0.18772	0.225791	2.03335	0.376792
	288	0.0200095	0.292063	2.06065	0.369534
	290	0.17797	0.304147	2.0971	0.311849
	292	0.00961076	0.25725	1.91708	0.310014
	294	-0.351834	0.270059	1.76899	0.267417
	296	-0.330123	0.371923	1.84075	0.346053
	298	-0.345026	0.312682	1.9492	0.384974
	300	-0.15309	0.321337	1.99545	0.394656
	302	-0.173221	0.276527	2.10856	0.482256
	304	-0.11795	0.313305	2.45093	0.524429
	306	0.0432322	0.276724	2.53741	0.472733
	308	0.0941154	0.298985	2.753	0.433818
	310	-0.129335	0.334268	2.54301	0.572781
	312	0.362249	0.349844	2.55004	0.4635
	314	0.298205	0.292153	2.4844	0.377758
	316	0.109138	0.250035	2.74147	0.491295
	318	0.211456	0.270668	2.59301	0.533903
	320	0.3432	0.278042	2.6219	0.57444
	322	-0.0324788	0.201248	2.32615	0.367361
	324	0.102156	0.124622	2.3907	0.392507
	326	-0.0517621	0.197036	2.26311	0.392029
	328	-0.173795	0.190936	2.15313	0.41757
	330	-0.332317	0.41053	2.34075	0.400782
	332	-0.3391	0.306854	2.361	0.402487
	334	-0.187872	0.287264	2.12049	0.280779
	336	-0.14353	0.307955	2.21913	0.258398
	338	-0.111904	0.30937	2.10936	0.426015
	340	-0.342494	0.286751	2.23152	0.469116
	342	-0.154298	0.311242	2.28426	0.577036
	344	0.117978	0.31102	2.28638	0.541007
	346	0.0671975	0.277458	2.48039	0.378684
	348	-0.169296	0.280385	2.33085	0.458321
	350	0.160001	0.23601	2.7752	0.608674
	352	0.111471	0.259469	2.67525	0.553309
	354	-0.206087	0.205708	2.54058	0.608363
	356	-0.201086	0.291953	2.39259	0.705301
	358	-0.0983541	0.242054	2.75421	0.583635
	360	-0.21591	0.196636	2.489	0.625204
	362	-0.217979	0.208682	2.47075	0.51275
	364	0.0442902	0.358584	2.40413	0.567148
	366	-0.282339	0.385586	1.97961	0.464244
	368	0.151994	0.431088	1.95753	0.434726
	370	0.275989	0.293334	2.23776	0.476382
	372	0.27147	0.287379	2.14431	0.537068
	374	0.164643	0.300022	2.36393	0.44266
	376	0.0081426	0.123992	2.31186	0.635093
	378	0.143422	0.206057	2.31179	0.639158
	380	0.0110085	0.144205	2.22865	0.430446
	382	-0.0102783	0.173995	2.34949	0.457918
	384	0.0843514	0.300807	2.14871	0.533782
	386	0.00886842	0.301018	2.32713	0.598744
	388	0.0495964	0.311838	2.40929	0.505013
	390	-0.0274902	0.262206	2.34675	0.703178
	392	-0.171369	0.237755	2.11645	0.577598
	394	0.00229935	0.332661	2.19958	0.612255
	396	0.253128	0.381378	2.05965	0.484441
	398	-0.00885807	0.401886	2.22841	0.506086
	400	-0.0072403	0.217968	2.1626	0.449475
	402	-0.313543	0.38382	2.16476	0.426189
	404	-0.282931	0.455937	2.15592	0.439977
	406	-0.282953	0.419324	2.02992	0.523989
	408	-0.282861	0.487481	2.08107	0.526319
	410	-0.263375	0.451836	2.02994	0.450684
	412	-0.306101	0.482449	2.30846	0.383908
	414	-0.249312	0.520025	2.178	0.448015
	416	-0.314962	0.496227	2.47284	0.284892
	418	-0.0071316	0.507687	2.4689	0.372702
	420	0.0565871	0.527549	2.38554	0.563984
	422	-0.046581	0.470088	2.31569	0.57262
	424	0.0642903	0.34767	2.22435	0.491683
	426	0.418669	0.335181	2.1557	0.427415
	428	0.399103	0.308596	2.36858	0.596608
	430	0.245734	0.310079	2.28691	0.586018
	432	0.170075	0.339742	2.45996	0.625097
	434	0.301464	0.174021	2.4514	0.628321
	436	0.208765	0.167698	2.53483	0.667965
	438	0.46503	0.232174	3.0462	0.719296
	440	0.592164	0.25352	2.39555	0.542671
	442	0.413462	0.294254	2.22136	0.466167
	444	0.330621	0.274419	2.20164	0.537144
	446	0.257652	0.265827	2.29661	0.516881
	448	0.0976959	0.17007	2.37439	0.47904
	450	-0.321987	0.243861	2.38066	0.542181
	452	-0.21179	0.225112	2.38826	0.496041
	454	0.0142503	0.177486	2.58986	0.559349
	456	0.16665	0.346323	2.47777	0.492506
	458	-0.0368306	0.169304	2.42283	0.494257
	460	0.0822599	0.172157	2.45651	0.49474
	462	-0.0751129	0.178989	2.48291	0.418597
	464	-0.0648738	0.16739	2.49206	0.406841
	466	0.0551717	0.140277	2.26479	0.360736
	468	0.0701503	0.267117	2.39863	0.374507
	470	0.102888	0.255744	2.31832	0.442897
	472	0.0960609	0.209101	2.3838	0.432823
	474	-0.0090236	0.195417	2.16044	0.396284
	476	0.148392	0.242282	2.62565	0.46154
	478	0.307048	0.249912	2.44026	0.320389
	480	0.340907	0.256691	2.46425	0.396079
	482	0.0970756	0.303516	2.42862	0.409924
	484	0.320004	0.247407	2.26068	0.464978
	486	0.242685	0.284627	2.25721	0.514596
	488	0.260305	0.166099	2.46026	0.412734
	490	0.169633	0.226318	2.61743	0.63983
	492	0.237032	0.181497	2.79168	0.488121
	494	-0.0663246	0.225571	3.13567	0.643904
	496	0.0714873	0.242971	3.18401	0.573228
	498	0.0432682	0.194825	3.07885	0.568724
	500	0.273057	0.202478	3.12029	0.58623
	502	0.201413	0.190392	3.20821	0.527807
	504	0.171647	0.19408	2.85002	0.582135
	506	0.170875	0.265542	2.40357	0.528175
	508	0.361529	0.325001	2.61032	0.640957
	510	0.417945	0.376734	2.78902	0.643461
	512	0.330922	0.373639	2.4509	0.667782
	514	0.274989	0.451676	2.12099	0.562662
	516	0.212741	0.471917	2.16018	0.553183
	518	0.225046	0.344894	2.10617	0.569625
	520	0.329442	0.325271	2.0822	0.399283
	522	-0.197436	0.36893	1.81829	0.261382
	524	0.0443128	0.359749	2.12716	0.363664
	526	0.000666377	0.35043	2.01085	0.279274
	528	-0.0443222	0.354869	2.28379	0.338567
	530	-0.151947	0.350839	2.1558	0.362963
	532	0.0480309	0.393438	2.4019	0.320248
	534	0.206221	0.305046	2.38533	0.322901
	536	0.208216	0.469352	2.41141	0.253404
	538	-0.0943356	0.340794	2.09277	0.229183
	540	0.294772	0.344624	2.37514	0.400205
	542	0.37842	0.345723	2.14697	0.344147
	544	0.250186	0.240987	1.87558	0.294284
	546	0.118118	0.202263	1.90424	0.336082
	548	0.327361	0.255149	2.25399	0.411051
	550	0.0570902	0.185065	2.09354	0.388758
	552	-0.066519	0.263745	2.1132	0.512362
	554	-0.301566	0.334619	2.3128	0.494564
	556	-0.054933	0.347683	2.3285	0.482155
	558	0.0570856	0.312951	2.25872	0.465825
	560	-0.12734	0.239296	2.01642	0.488491
	562	-0.262074	0.307115	2.12571	0.474928
	564	-0.0784603	0.249222	2.40375	0.543179
	566	-0.11351	0.103177	2.22475	0.506825
	568	-0.015135	0.295801	2.40243	0.376116
	570	0.266862	0.18807	2.46755	0.340208
	572	0.506797	0.183094	2.71705	0.402835
	574	0.524042	0.205302	2.56012	0.524591
	576	0.49599	0.245835	2.22959	0.505083
	578	0.356274	0.378547	2.80576	0.415381
	580	0.166619	0.32961	2.62796	0.376
	582	0.196878	0.406194	2.59141	0.437289
	584	0.0328178	0.425929	2.89445	0.385102
	586	0.401515	0.44954	2.98141	0.588091
	588	0.170201	0.277667	2.57696	0.542704
	590	0.314655	0.218095	2.85102	0.626696
	592	0.423976	0.243125	2.7337	0.360376
	594	0.436206	0.282192	2.49512	0.507363
	596	0.272749	0.303771	2.16949	0.490321
	598	0.185239	0.417942	2.01866	0.434011
	600	0.319825	0.253924	2.11596	0.43139
	602	0.139095	0.476943	1.97669	0.458296
	604	0.0150736	0.351569	2.0151	0.502072
	606	0.0910508	0.276984	2.053	0.557127
	608	-0.0255813	0.273065	2.53876	0.638078
	610	0.112278	0.202991	2.47647	0.53807
	612	0.018478	0.081812	2.21024	0.404308
	614	0.117776	0.0476038	1.87076	0.378877
	616	0.106543	0.191312	2.21038	0.464212
	618	-0.0853404	0.102705	1.86905	0.457583
	620	0.333784	0.323933	2.03356	0.457851
	622	0.370232	0.333976	2.08715	0.616697
	624	0.172782	0.153256	2.22277	0.692004
	626	0.0590895	0.0820163	2.32969	0.640562
	628	0.169441	0.177248	2.4499	0.502121
	630	0.108822	0.184275	2.49027	0.564475
	632	0.223515	0.149451	2.56142	0.613291
	634	0.134161	0.166506	2.48261	0.47975
	636	0.0207582	0.196157	2.31403	0.377512
	638	-0.113249	0.174902	2.43735	0.501961
	640	-0.0135256	0.251738	2.4775	0.326454
	642	-0.165655	0.155121	2.42225	0.302496
	644	-0.0619046	0.19131	2.38353	0.292932
	646	0.214508	0.217922	2.5658	0.300437
	648	0.209987	0.31201	2.43549	0.247917
	650	0.319844	0.20462	2.26521	0.301855
	652	0.166614	0.29375	2.33245	0.263438
	654	0.120447	0.298116	2.6674	0.33162
	656	0.266127	0.18561	3.02134	0.628042
	658	0.136606	0.116737	2.92258	0.686494
	660	0.105533	0.165579	2.46535	0.533281
	662	0.21715	0.144408	2.5853	0.568398
	664	-0.0310625	0.265285	2.64158	0.666467
	666	-0.0628284	0.277929	2.57248	0.581642
	668	-0.114779	0.328292	2.40114	0.464867
	670	0.030604	0.37288	2.21551	0.550043
	672	0.114457	0.31973	2.4128	0.499024
	674	0.256289	0.300622	2.48825	0.526851
	676	0.36192	0.310654	2.40849	0.534802
	678	0.414252	0.263873	2.32713	0.53819
	680	0.304384	0.231863	2.64449	0.570229
	682	0.305087	0.273172	2.62258	0.58983
	684	0.275685	0.223559	2.47219	0.514811
	686	0.474451	0.340564	2.42677	0.427616
	688	0.320175	0.284211	2.62079	0.521749
	690	0.150938	0.238427	2.15898	0.617042
	692	0.220749	0.226117	2.1628	0.724732
	694	-0.0324275	0.182277	2.56738	0.527889
	696	0.0533226	0.212115	2.33756	0.525786
	698	0.226468	0.232238	2.4819	0.429551
	700	0.212402	0.297251	2.54695	0.374876
	702	0.13437	0.341268	2.44456	0.451395
	704	0.13364	0.312256	2.16587	0.42047
	706	0.139219	0.144978	2.51956	0.509426
	708	-0.175688	0.306897	2.62333	0.555346
	710	-0.12515	0.344862	2.30389	0.551286
	712	-0.0965962	0.248926	2.45356	0.48659
	714	-0.0621486	0.221851	2.59074	0.447887
	716	-0.109671	0.233025	2.49256	0.452332
	718	0.0846703	0.168044	2.42917	0.332339
	720	-0.233982	0.223291	2.63221	0.368808
	722	-0.305539	0.253523	2.82637	0.366845
	724	-0.312271	0.267397	2.8435	0.451329
	726	-0.313416	0.235034	2.97269	0.480363
	728	-0.0693863	0.24137	2.94048	0.628645
	730	0.148925	0.198757	2.9233	0.676254
	732	0.108467	0.162623	2.63795	0.570849
	734	-0.0273741	0.183654	2.49513	0.661727
	736	-0.0712502	0.207554	2.80608	0.48248
	738	0.077492	0.159464	3.12988	0.522865
	740	-0.410437	0.311424	2.83035	0.592196
	742	-0.321539	0.219208	2.86867	0.519046
	744	-0.36219	0.337809	2.74297	0.508811
	746	-0.273362	0.343963	2.78198	0.487436
	748	-0.346642	0.358178	2.86688	0.513241
	750	0.0388305	0.232387	2.75979	0.52092
	752	0.196706	0.201101	2.83508	0.565766
	754	0.349894	0.187931	2.55901	0.555311
	756	0.51033	0.199791	2.61793	0.670019
	758	0.399938	0.176752	2.66906	0.753292
	760	0.317874	0.132583	2.65469	0.699252
	762	0.275309	0.170246	2.60343	0.560246
	764	0.0860607	0.212512	3.11916	0.596749
	766	-0.0593978	0.191382	3.07574	0.552787
	768	-0.2486	0.215881	2.65378	0.405365
	770	-0.26261	0.207075	2.51158	0.367309
	772	-0.0580141	0.206222	2.27029	0.359911
	774	-0.0259589	0.198482	2.51087	0.465975
	776	0.121526	0.227496	2.448	0.487289
	778	0.24619	0.286661	2.22087	0.548846
	780	0.233401	0.237831	2.42808	0.482314
	782	0.319264	0.331421	2.63941	0.490746
	784	0.381712	0.451148	2.51519	0.556705
	786	0.301132	0.39298	2.45402	0.511834
	788	0.132666	0.440993	2.56849	0.365896
	790	0.226379	0.457523	2.50803	0.314836
	792	0.0793302	0.517301	2.48202	0.381971
	794	0.271145	0.312011	2.37037	0.341103
	796	0.0665451	0.343449	2.55916	0.179175
	798	0.504897	0.333113	2.67184	0.196918
	800	0.390073	0.299174	2.75406	0.333403
	802	0.279185	0.280704	2.62631	0.311272
	804	0.432545	0.254393	2.81383	0.327226
	806	0.571637	0.214653	2.71521	0.387714
	808	0.280303	0.31832	2.73177	0.469953
	810	0.252102	0.302586	2.83281	0.469476
	812	0.516592	0.175084	2.59673	0.478317
	814	0.663212	0.203301	2.59994	0.379301
	816	-0.0509731	0.30251	2.75137	0.481428
	818	-0.201344	0.184649	2.55374	0.348187
	820	0.453521	0.224503	2.38914	0.428472
	822	0.127176	0.175929	2.51074	0.54338
	824	0.421498	0.325325	2.29237	0.556633
	826	0.0608032	0.24002	2.41768	0.592322
	828	0.203249	0.360713	2.53442	0.572062
	830	-0.0759316	0.453254	2.54939	0.626093
	832	-0.0636353	0.462008	2.52465	0.546621
	834	0.0801891	0.451712	2.56135	0.651558
	836	0.490112	0.50187	2.55599	0.634218
	838	0.547691	0.413782	2.50564	0.639878
	840	0.304603	0.274696	2.57673	0.581574
	842	0.141192	0.274887	2.76085	0.585199
	844	0.00987682	0.224798	2.7649	0.46457
	846	0.100943	0.24274	2.71174	0.602102
	848	0.0693891	0.238787	2.84452	0.597294
	850	-0.124145	0.242799	2.39138	0.735875
	852	0.194359	0.229918	2.28487	0.678526
	854	0.172249	0.220314	2.36169	0.646749
	856	0.0630816	0.177025	2.24415	0.675953
	858	-0.0511104	0.272856	2.51213	0.514582
	860	0.0190924	0.215048	2.28043	0.524356
	862	-0.0414197	0.190683	2.33592	0.565251
	864	0.163872	0.246375	2.86464	0.417832
	866	0.111582	0.310401	3.04124	0.471635
	868	0.163305	0.336532	2.58298	0.428116
	870	0.374874	0.293867	2.59038	0.427644
	872	0.399319	0.218832	2.53918	0.594624
	874	0.293037	0.313804	2.51994	0.564647
	876	0.0559208	0.170963	2.41599	0.729581
	878	-0.0670671	0.229999	2.30236	0.649524
	880	-0.213769	0.196337	2.44188	0.575873
	882	-0.136192	0.172016	2.26278	0.495186
	884	-0.179597	0.23929	2.13361	0.485473
	886	-0.0075514	0.288237	2.12254	0.445633
	888	0.239339	0.235488	2.72026	0.487814
	890	0.37394	0.244218	3.34898	0.697573
	892	0.579226	0.264635	3.11369	0.682983
	894	0.475425	0.249973	2.7615	0.425734
	896	0.210142	0.26752	2.8209	0.428229
	898	0.289702	0.268922	2.77598	0.444413
	900	0.359606	0.245833	2.75315	0.531202
	902	0.409741	0.288385	2.67149	0.517556
	904	0.380379	0.267593	2.76059	0.625007
	906	0.0201358	0.480161	2.7268	0.494342
	908	0.0202433	0.159409	2.75462	0.570548
	910	-0.449308	0.429557	2.59794	0.60099
	912	-0.503403	0.415194	2.44921	0.592318
	914	0.0555089	0.294432	2.50027	0.393486
	916	0.254491	0.375	2.97666	0.531349
	918	0.137877	0.281986	2.60829	0.394685
	920	0.155309	0.339191	2.77094	0.428467
	922	0.384481	0.443135	2.70024	0.479025
	924	0.21361	0.358702	2.54166	0.40715
	926	-0.0523585	0.276344	2.38077	0.355603
	928	0.199147	0.246298	2.33592	0.506534
	930	0.143152	0.283967	2.18934	0.500696
	932	0.0942136	0.444905	2.80605	0.235006
	934	0.0487151	0.435563	2.5846	0.398286
	936	-0.225052	0.425565	2.62852	0.401854
	938	-0.398394	0.371823	2.36133	0.375856
	940	-0.291469	0.322249	2.60957	0.267724
	942	-0.285923	0.26448	2.63616	0.377291
	944	-0.226644	0.266363	2.92912	0.310124
	946	-0.119142	0.320844	2.86899	0.458196
	948	-0.0819001	0.35302	3.34822	0.493443
	950	0.0120804	0.28583	3.03273	0.341485
	952	0.102026	0.232688	2.56053	0.418832
	954	-0.00742309	0.255398	2.68994	0.302037
	956	-0.182121	0.194428	2.12365	0.355857
	958	-1.22515	0.405301	1.73254	0.327423

## Sheet: Fig.1e
	Time traces						δCKAR response
		No RNAi		PKCδ RNAi JF02991			No RNAi	PKCδ RNAi JF02991
	Time (s)	Mean	SEM	Mean	SEM		1.8282	-3.2723
	0	-0.803557	0.387839	-0.263728	0.569287		1.08814	-2.8261
	2	0.112764	0.412832	0.259833	0.378348		2.2172	-0.07588
	4	0.122728	0.248213	0.17172	0.414503		3.30115	0.72409
	6	0.444741	0.127841	0.461391	0.283812		1.62685	-1.18255
	8	-0.0375347	0.440733	0.228126	0.308451		1.4707
	10	0.50151	0.210789	0.214197	0.266765
	12	0.258079	0.341656	-0.0083271	0.282554
	14	0.449341	0.278081	-0.0477269	0.200242
	16	0.10303	0.280662	0.0813533	0.269327
	18	0.51181	0.218602	0.0357289	0.177651
	20	-0.0678192	0.19709	-0.198188	0.330827
	22	0.0859762	0.176754	-0.16146	0.341211
	24	-0.15801	0.19999	-0.143349	0.225318
	26	0.0245248	0.161496	-0.259242	0.353605
	28	0.22828	0.25457	-0.0404991	0.35585
	30	0.233476	0.22633	0.165242	0.156959
	32	-0.0723127	0.283277	-0.0273502	0.271957
	34	-0.0791493	0.298594	-0.0920867	0.292686
	36	-0.428682	0.201189	-0.0110796	0.293207
	38	-0.46625	0.47507	0.0800213	0.329003
	40	-0.0892261	0.225323	-0.0140661	0.390874
	42	-0.322282	0.499475	-0.21417	0.175867
	44	0.461914	0.182482	-0.535278	0.235691
	46	0.145957	0.200818	-0.189014	0.184699
	48	0.149255	0.25632	-0.0788878	0.296953
	50	-0.0123249	0.243682	0.196463	0.323212
	52	0.150875	0.25471	0.0722804	0.311384
	54	0.143865	0.276195	-0.0260804	0.26266
	56	0.0959429	0.277277	0.328825	0.382996
	58	0.156397	0.272872	0.186088	0.386811
	60	0.560643	0.196226	0.346262	0.359837
	62	0.537408	0.156438	0.327377	0.476371
	64	-0.027888	0.244724	0.920396	0.209888
	66	-0.125494	0.194337	0.621011	0.194819
	68	-0.0513963	0.190847	0.262081	0.178758
	70	-0.0348492	0.270169	0.592015	0.296644
	72	-0.0156504	0.275999	0.365388	0.308972
	74	-0.129637	0.211873	0.153346	0.191455
	76	0.00416058	0.235922	0.149377	0.195587
	78	-0.188087	0.268215	0.210676	0.127676
	80	-0.0298774	0.273986	0.172868	0.171481
	82	-0.584259	0.1471	-0.0222245	0.285682
	84	-0.603647	0.283419	0.217083	0.167441
	86	-0.360246	0.241784	-0.693523	0.41815
	88	-0.277564	0.236774	-0.477122	0.418603
	90	-0.46357	0.293602	-0.853462	0.426704
	92	-0.456515	0.261183	-0.0811535	0.179066
	94	-0.525394	0.247582	-0.21911	0.122644
	96	-0.243731	0.255881	-0.314887	0.25229
	98	-0.405582	0.0963873	-0.423029	0.226173
	100	-0.551392	0.192596	-0.448298	0.235702
	102	-0.325151	0.15191	-0.686525	0.263572
	104	-0.253886	0.248344	-0.551772	0.119067
	106	0.245294	0.324667	-0.371451	0.154198
	108	0.240093	0.214997	-0.287087	0.166552
	110	0.475786	0.217895	-0.186399	0.200314
	112	0.306546	0.325626	0.149998	0.586676
	114	0.360337	0.277107	0.82969	0.350605
	116	0.281005	0.166306	0.675569	0.317956
	118	0.159937	0.161512	0.823488	0.119708
	120	-0.0307623	0.234667	0.952277	0.320245
	122	-0.187538	0.292401	0.504561	0.58868
	124	-0.443308	0.410171	0.523612	0.714357
	126	-0.925109	0.225196	0.525015	0.324576
	128	-0.636691	0.336238	0.654238	0.299031
	130	-0.345414	0.31906	0.479982	0.388478
	132	-0.229127	0.336427	0.341305	0.343921
	134	-0.0275457	0.372298	0.23621	0.230074
	136	0.323012	0.42596	0.290559	0.214673
	138	0.276812	0.346809	-0.143481	0.311001
	140	0.51225	0.389897	-0.502134	0.275995
	142	0.625392	0.382195	-0.167711	0.203203
	144	0.573414	0.178448	-0.159248	0.201391
	146	0.595515	0.19639	-0.19988	0.252323
	148	0.527474	0.260972	-0.288358	0.238198
	150	0.58065	0.251395	-0.190169	0.36771
	152	0.481583	0.324432	-0.406485	0.360551
	154	1.27811	0.221806	-0.220625	0.328833
	156	1.2987	0.16793	-0.50647	0.39752
	158	1.26498	0.122236	-0.144541	0.415894
	160	1.14071	0.301234	-0.267795	0.532931
	162	1.03989	0.379025	-0.137588	0.64413
	164	1.19878	0.309692	-0.215552	0.583683
	166	1.23184	0.224772	-0.544372	0.551269
	168	1.13036	0.279987	-0.680997	0.543907
	170	1.08018	0.186037	-0.745411	0.563262
	172	1.21456	0.235743	-0.568867	0.44264
	174	1.31132	0.239663	-0.450045	0.405042
	176	1.20849	0.253677	-0.205632	0.437124
	178	1.18955	0.352338	-0.256319	0.202145
	180	1.51381	0.267562	-0.0878272	0.119297
	182	1.7603	0.312767	-0.0386614	0.271006
	184	2.05252	0.321215	-0.341092	0.363616
	186	2.05672	0.480038	-0.66801	0.325836
	188	2.34722	0.432355	-0.40468	0.329875
	190	2.17694	0.452096	-0.357876	0.395704
	192	2.14184	0.384985	-0.725582	0.537654
	194	1.9765	0.186834	-0.681467	0.510109
	196	1.91449	0.191994	-0.227205	0.38563
	198	2.1899	0.296282	-0.584965	0.456547
	200	1.66447	0.237007	-0.300748	0.540644
	202	1.9529	0.302375	-0.165423	0.367873
	204	2.04066	0.236304	-0.25564	0.546008
	206	2.28437	0.300761	-0.470764	0.545362
	208	1.79293	0.350963	-0.505243	0.337338
	210	1.85478	0.358807	-0.804508	0.441449
	212	2.45213	0.465541	-1.07475	0.647311
	214	2.49101	0.340386	-0.966973	0.576802
	216	2.37554	0.278049	-0.982334	0.614052
	218	2.30047	0.304996	-0.82278	0.65415
	220	2.26814	0.294721	-1.05643	0.488585
	222	2.58848	0.412878	-0.97168	0.506028
	224	2.7098	0.487922	-1.31915	0.799523
	226	2.47892	0.443507	-1.30554	0.903676
	228	2.55307	0.372382	-1.18949	0.941329
	230	2.56693	0.296047	-1.32678	1.10787
	232	2.69105	0.194989	-1.29437	1.2063
	234	2.61293	0.194613	-1.29349	1.29124
	236	2.44294	0.178893	-1.49011	1.46467
	238	2.23777	0.22748	-2.15698	1.59966
	240	2.52334	0.312385	-1.64664	1.74289
	242	2.3508	0.393205	-2.13109	1.66135
	244	2.29273	0.28459	-1.70146	1.69428
	246	2.25292	0.183258	-0.709743	0.339681
	248	2.39109	0.339942	-0.366572	0.339895
	250	2.2667	0.282224	-0.0345164	0.31542
	252	2.41922	0.298067	0.242863	0.358715
	254	2.22459	0.258308	0.123516	0.358796
	256	2.026	0.360534	-0.315837	0.236054
	258	2.09901	0.35056	-0.0431243	0.250448
	260	2.27509	0.233863	-0.169424	0.224425
	262	2.24565	0.206821	-0.196769	0.144303
	264	2.28751	0.240539	-0.565851	0.243511
	266	2.05067	0.390063	-0.754858	0.432277
	268	2.09506	0.375342	-0.660842	0.472662
	270	1.68767	0.246687	-0.897728	0.594071
	272	1.71518	0.327485	-1.13138	0.357583
	274	1.92167	0.321858	-1.08697	0.215138
	276	2.30333	0.35646	-0.973128	0.186527
	278	2.19414	0.301101	-0.593353	0.418076
	280	1.9851	0.323974	-0.62641	0.215323
	282	1.94613	0.250406	-0.446797	0.29259
	284	2.08781	0.177974	-0.407993	0.522623
	286	2.00542	0.127484	-0.398696	0.449597
	288	2.07354	0.0888466	-0.269149	0.332247
	290	1.89986	0.14539	-0.232706	0.421579
	292	2.21357	0.29516	-0.186509	0.350469
	294	1.68555	0.354788	-0.390395	0.492314
	296	2.07921	0.373561	0.0398906	0.360004
	298	1.8835	0.278924	-0.339122	0.368873
	300	1.8652	0.334185	-0.384804	0.460518
	302	1.82175	0.267095	-0.479542	0.268899
	304	1.72949	0.254814	-0.0816839	0.316872
	306	1.9766	0.191321	-0.0251802	0.378531
	308	1.9245	0.232666	-0.478791	0.644026
	310	2.13892	0.279005	-0.387751	0.35371
	312	2.25333	0.309825	-0.601929	0.319841
	314	2.36141	0.304401	-0.852639	0.55942
	316	2.02241	0.175935	-0.941439	0.42547
	318	2.04234	0.189721	-0.67238	0.401784
	320	1.67155	0.177398	-0.732963	0.357452
	322	1.42541	0.262178	-0.629107	0.444784
	324	1.47907	0.38166	-0.418122	0.49407
	326	1.67349	0.371588	-0.0511969	0.425531
	328	1.76976	0.347587	-0.028883	0.206071
	330	1.9688	0.34927	0.113949	0.38233
	332	2.38012	0.308924	-0.264658	0.415241
	334	2.50848	0.326297	-0.643625	0.290697
	336	2.18855	0.353158	-0.934441	0.457092
	338	1.9258	0.295215	-1.72217	0.546918
	340	2.07261	0.216981	-2.06124	0.798445
	342	2.21944	0.179357	-1.66083	0.935256
	344	2.39539	0.280133	-0.920006	0.871669
	346	1.9764	0.347794	-1.05572	0.622161
	348	2.25162	0.313474	-0.9861	0.470773
	350	2.09322	0.269341	-0.70598	0.34108
	352	1.63239	0.150675	-0.964526	0.462001
	354	1.7832	0.178556	-0.835715	0.536185
	356	2.05908	0.391009	-0.759635	0.513437
	358	2.28108	0.389136	-0.931257	0.535936
	360	2.24643	0.488252	-0.852704	0.523072
	362	2.39796	0.372442	-0.86026	0.456342
	364	2.27662	0.382769	-0.663446	0.440382
	366	2.0499	0.28327	-0.763918	0.46283
	368	1.9732	0.369839	-0.982881	0.691158
	370	1.89997	0.278566	-0.996825	0.625993
	372	2.35703	0.251472	-0.984312	0.714543
	374	2.60904	0.421886	-0.928861	0.751036
	376	2.63072	0.423017	-0.620937	0.824049
	378	2.19601	0.534512	-0.733713	0.450054
	380	2.21751	0.364402	-0.557647	0.603393
	382	2.12701	0.379821	-0.614102	0.469026
	384	2.19659	0.307503	-0.758511	0.428603
	386	2.09475	0.299044	-0.774284	0.422652
	388	2.02899	0.457702	-0.838098	0.468361
	390	2.14543	0.317089	-0.560308	0.517896
	392	2.3459	0.434528	-0.903091	0.672413
	394	2.51852	0.274343	-1.06336	0.629454
	396	2.25899	0.432504	-0.848561	0.467673
	398	2.23604	0.367605	-1.09155	0.699526
	400	2.12732	0.488927	-1.23729	0.642749
	402	2.3991	0.42431	-1.3356	0.657485
	404	2.07559	0.490459	-1.17323	0.796303
	406	2.08704	0.463374	-1.51003	0.651174
	408	1.66349	0.207104	-1.49331	0.738124
	410	1.60928	0.25849	-1.20259	0.847026
	412	1.66285	0.310282	-0.775042	0.782123
	414	2.0549	0.331124	-0.943526	0.815722
	416	1.83852	0.337231	-0.9298	0.716083
	418	1.78017	0.308043	-0.974858	0.651088
	420	1.99891	0.243043	-0.948012	0.55518
	422	2.0973	0.140338	-0.642889	0.475864
	424	1.83967	0.263826	-0.533681	0.496821
	426	2.05291	0.314741	-0.958575	0.458685
	428	2.04999	0.376632	-0.775233	0.552291
	430	1.98043	0.388781	-1.07858	0.511015
	432	1.8698	0.402968	-1.43415	0.622896
	434	1.95966	0.443839	-1.18603	0.657523
	436	1.84987	0.46327	-1.56586	0.517207
	438	1.71659	0.369703	-1.39633	0.37203
	440	2.03829	0.565457	-1.30713	0.321104
	442	2.15258	0.493116	-1.14444	0.404894
	444	2.32868	0.513683	-1.17623	0.627151
	446	2.06553	0.369639	-1.05176	0.617633
	448	2.18376	0.406771	-1.25575	0.85066
	450	2.03805	0.268026	-1.07697	0.868277
	452	1.89012	0.228173	-1.19771	0.617597
	454	1.69945	0.296187	-1.122	0.595042
	456	1.9159	0.16132	-1.01588	0.578618
	458	2.19944	0.383422	-0.700477	0.530001
	460	1.8997	0.437626	-0.815689	0.655403
	462	1.87986	0.545783	-0.916756	0.417114
	464	1.98301	0.5425	-0.648768	0.363341
	466	2.04719	0.605678	-0.461152	0.516588
	468	2.05869	0.444695	-0.344492	0.530754
	470	2.09968	0.521537	-1.00491	0.58066
	472	1.84128	0.454759	-1.18199	0.480353
	474	1.6008	0.417691	-0.758377	0.670568
	476	1.47016	0.288378	-1.07316	0.538676
	478	1.43151	0.396397	-0.888942	0.780479
	480	1.39849	0.39397	-0.470181	0.398341
	482	1.59692	0.26539	-0.270835	0.518551
	484	1.65597	0.307227	-0.957179	0.358219
	486	1.87841	0.47849	-0.814616	0.636414
	488	2.14238	0.379011	-1.1087	0.492933
	490	1.80124	0.406813	-1.19939	0.614322
	492	1.93257	0.349907	-1.13206	0.622851
	494	1.66474	0.456383	-1.0533	0.608101
	496	1.50434	0.388306	-1.35109	0.495142
	498	1.46512	0.40705	-1.72419	0.817848
	500	1.68672	0.31854	-1.24134	0.847839
	502	1.82401	0.295853	-1.09275	1.18178
	504	1.68311	0.325123	-0.719087	1.20625
	506	1.78313	0.398192	-0.745167	1.21045
	508	1.82092	0.491237	-1.04147	0.73963
	510	1.72719	0.456863	-0.880559	0.707172
	512	2.00663	0.528285	-1.14354	0.566718
	514	2.09021	0.483263	-1.2805	0.614009
	516	2.09974	0.230727	-1.50429	0.417108
	518	2.11772	0.201278	-0.939005	0.470085
	520	2.11004	0.447313	-1.12155	0.707469
	522	2.18965	0.414623	-0.830961	0.738698
	524	2.0724	0.388157	-0.90476	0.683909
	526	1.96655	0.444838	-0.95203	0.797686
	528	1.76007	0.433855	-1.10105	0.936995
	530	1.90475	0.379796	-0.724683	0.757246
	532	2.11395	0.474108	-0.675135	0.83503
	534	1.9713	0.400051	-0.939014	0.403772
	536	2.21865	0.521015	-0.647556	0.631064
	538	2.04396	0.247925	-0.823304	0.472863
	540	2.32037	0.363602	-0.243656	0.593996
	542	2.37304	0.459856	-0.709735	0.484155
	544	2.24221	0.592624	-1.22574	0.613565
	546	2.1872	0.539112	-0.962917	0.569645
	548	2.27548	0.541809	-0.891746	0.606221
	550	2.09147	0.589377	-0.929913	0.7527
	552	2.0068	0.626216	-0.779118	0.746313
	554	1.95317	0.364955	-0.920213	0.609623
	556	1.68307	0.304361	-1.17326	0.939014
	558	1.65971	0.286456	-1.77137	0.900642
	560	1.67596	0.404633	-1.322	0.900304
	562	1.77057	0.539416	-1.26089	0.894892
	564	1.80075	0.486665	-1.60135	1.15454
	566	2.00346	0.613683	-1.96677	0.97708
	568	1.83432	0.679532	-1.74584	0.75388
	570	1.83108	0.767714	-1.82837	0.73787
	572	2.12425	0.669443	-1.14155	0.633844
	574	2.39895	0.691475	-0.902151	0.771208
	576	1.67007	0.478259	-1.05683	0.566916
	578	1.69682	0.413006	-1.48144	0.777799
	580	1.69568	0.395693	-2.0175	1.05188
	582	1.85992	0.259643	-1.91178	1.218
	584	1.96434	0.449241	-1.65564	1.18708
	586	2.56268	0.550291	-1.57658	1.18662
	588	2.03676	0.351128	-1.22359	0.930984
	590	1.94514	0.396438	-1.20222	0.971365
	592	1.7915	0.355962	-0.817208	0.553938
	594	2.2929	0.355644	-1.21003	0.931969
	596	1.9923	0.479922	-1.29283	0.925918
	598	2.55372	0.333485	-1.29481	0.65988
	600	1.94658	0.262153	-1.21369	0.667707
	602	2.16307	0.387149	-1.15348	0.718544
	604	2.03199	0.358216	-0.895242	0.659333
	606	1.81824	0.459466	-0.719507	0.579826
	608	1.79092	0.436238	-0.685972	0.420736
	610	1.90494	0.353921	-0.307156	0.467604
	612	1.88628	0.330003	-0.342095	0.528169
	614	1.78754	0.350634	-0.358401	0.439311
	616	1.80636	0.345252	-0.47891	0.414843
	618	2.06036	0.355399	-0.454734	0.415889
	620	1.64062	0.425362	-0.438834	0.551445
	622	1.87994	0.159673	-0.508305	0.602092
	624	1.87843	0.232867	-0.807002	0.508132
	626	1.92772	0.37721	-1.75672	1.00252
	628	1.97082	0.424209	-1.8333	1.19185
	630	2.13834	0.465523	-2.04027	1.47303
	632	1.9653	0.459183	-1.9228	1.36198
	634	1.8446	0.451848	-1.3364	1.00255
	636	1.69012	0.377999	-1.17187	0.76336
	638	1.82666	0.443804	-1.00472	0.77957
	640	1.91925	0.367605	-1.07162	0.760989
	642	1.85315	0.432207	-0.653559	0.540835
	644	2.15649	0.534708	-1.09963	0.600953
	646	2.25124	0.621618	-1.36394	0.612246
	648	2.04239	0.408046	-1.4107	0.825598
	650	1.8531	0.326168	-1.34973	0.822141
	652	1.76902	0.418052	-1.29462	0.680428
	654	1.68942	0.40939	-1.40507	0.886951
	656	1.7784	0.446651	-1.73103	1.32058
	658	1.56333	0.464325	-1.41054	0.981235
	660	1.50995	0.362679	-1.32058	1.26265
	662	1.643	0.193648	-1.7218	1.5037
	664	1.8606	0.207077	-2.04046	1.39523
	666	2.09621	0.346762	-1.54026	1.2657
	668	1.94159	0.258633	-1.32526	1.14935
	670	1.95478	0.503714	-1.83528	1.03811
	672	1.65427	0.320938	-1.74598	1.38443
	674	1.67554	0.324131	-1.65868	1.53375
	676	1.69935	0.486743	-2.30547	1.56252
	678	1.51363	0.146514	-2.61731	1.45563
	680	1.75507	0.334531	-2.30227	1.4026
	682	1.81144	0.320965	-1.73329	1.35089
	684	1.8845	0.50155	-1.73653	1.40321
	686	1.88948	0.52963	-1.45153	1.32528
	688	2.1328	0.674292	-1.2479	1.13272
	690	2.07948	0.562103	-0.933227	1.16012
	692	1.83824	0.454507	-1.50034	1.07599
	694	1.97146	0.442908	-1.201	0.831438
	696	2.19321	0.427046	-1.41278	0.76171
	698	2.16403	0.541391	-0.750332	0.552018
	700	2.21194	0.681179	-1.23027	0.625644
	702	2.4149	0.478228	-1.24264	0.642755
	704	1.74603	0.671944	-1.23921	0.597338
	706	1.68258	0.35873	-1.17432	0.624225
	708	1.89766	0.180329	-1.18438	0.711015
	710	1.94287	0.297494	-0.824941	0.754382
	712	1.77371	0.370036	-1.00258	0.964455
	714	1.76056	0.283958	-0.926348	0.921817
	716	1.96615	0.473805	-1.50809	0.983257
	718	2.11231	0.38402	-1.82521	0.869947
	720	2.48361	0.493654	-1.99568	1.10516
	722	2.38205	0.456557	-1.99201	1.1002
	724	2.51405	0.523394	-1.59156	0.830843
	726	2.14532	0.703256	-1.84848	0.874895
	728	1.87573	0.528684	-1.83352	1.09234
	730	1.66206	0.510839	-2.14134	0.966959
	732	1.644	0.391735	-1.70137	1.3485
	734	1.75257	0.513974	-2.20864	1.51322
	736	2.14073	0.415133	-2.46465	1.42921
	738	1.75845	0.389236	-2.22236	1.21918
	740	1.66429	0.269981	-1.98905	1.33026
	742	1.79488	0.344321	-2.158	1.30524
	744	1.87743	0.273191	-2.14802	1.42217
	746	1.6917	0.330468	-2.44683	1.63993
	748	1.7964	0.357535	-2.8313	1.80789
	750	2.00476	0.407793	-2.35545	1.68806
	752	2.35717	0.322743	-2.67901	1.49186
	754	1.89302	0.430306	-2.00673	1.06094
	756	1.91286	0.34132	-1.53432	0.669416
	758	1.932	0.265151	-1.31572	0.937463
	760	2.00808	0.3991	-1.30299	0.95714
	762	1.94961	0.444673	-1.60127	1.08719
	764	1.67209	0.507905	-1.18387	0.937003
	766	1.82892	0.551537	-1.10396	0.949313
	768	1.48817	0.630997	-0.855264	0.846598
	770	1.80888	0.562465	-0.39068	0.903932
	772	1.609	0.438944	-0.23906	0.850172
	774	1.80859	0.40067	-0.458768	0.835769
	776	1.70145	0.431785	-1.27894	0.930244
	778	1.89982	0.315598	-1.95796	1.24684
	780	1.84971	0.331075	-2.21307	1.66878
	782	1.49393	0.118129	-2.43139	1.59399
	784	1.43279	0.281882	-2.43955	1.57976
	786	1.65025	0.274446	-1.45445	0.667911
	788	1.97865	0.36658	-1.24289	0.7068
	790	2.32613	0.628014	-1.18595	0.767592
	792	2.05513	0.797465	-0.614688	0.785783
	794	2.27203	0.55003	-0.859403	0.952369
	796	1.92659	0.419774	-0.86691	0.668934
	798	2.00097	0.349886	-0.879271	0.542384
	800	1.91284	0.304143	-0.705068	0.57384
	802	1.71151	0.323329	-0.449069	0.435289
	804	1.88064	0.431473	-0.457342	0.472205
	806	2.03697	0.411939	-0.59337	0.461544
	808	2.00114	0.392193	-0.67197	0.528131
	810	1.94787	0.350389	-0.816649	0.521292
	812	2.11037	0.368184	-1.11019	0.644918
	814	2.0166	0.410527	-0.865372	0.619804
	816	1.72191	0.473697	-1.41323	0.931613
	818	1.81893	0.485342	-1.20287	0.947808
	820	1.63988	0.589224	-1.75255	1.13435
	822	1.85865	0.595533	-1.70157	1.20677
	824	2.13775	0.498559	-1.64832	1.1964
	826	2.3111	0.345437	-1.13487	1.05787
	828	2.33117	0.371097	-0.956193	0.875874
	830	2.48854	0.210356	-0.825849	1.00909
	832	2.03346	0.391185	-1.00192	0.859576
	834	2.20335	0.351504	-1.18455	0.61658
	836	2.09149	0.438323	-0.906863	0.733401
	838	2.1742	0.445435	-1.19101	0.885464
	840	2.14151	0.400726	-1.04689	0.485714
	842	2.2383	0.400411	-1.05747	0.675351
	844	1.86321	0.388638	-1.38763	0.738433
	846	1.59558	0.532928	-1.16394	0.685206
	848	1.43843	0.371475	-1.33599	0.695848
	850	1.79054	0.41935	-1.39016	0.880045
	852	1.52658	0.298576	-1.83287	0.928631
	854	1.95457	0.592337	-1.07191	1.10257
	856	1.74584	0.457578	-2.16704	1.12166
	858	1.83833	0.392595	-1.90279	1.0408
	860	2.2128	0.314988	-2.07641	0.997127
	862	2.22296	0.415452	-2.00484	1.03009
	864	2.13986	0.426424	-1.6161	1.09002
	866	1.75115	0.47157	-0.884207	0.983232
	868	1.238	0.451872	-0.804137	0.894792
	870	1.53427	0.369212	-1.12649	1.06386
	872	1.80324	0.513199	-0.839502	0.874974
	874	1.91064	0.506551	-0.866099	0.96509
	876	1.66853	0.459678	-1.08064	0.698306
	878	1.78331	0.453854	-1.41109	0.790575
	880	2.06806	0.43287	-1.42357	0.727145
	882	1.9889	0.50876	-2.0092	0.904994
	884	1.98923	0.384721	-1.17354	0.711476
	886	1.65995	0.462412	-1.53884	1.1059
	888	1.44988	0.43806	-1.48931	1.14609
	890	1.53981	0.363374	-1.36266	0.996151
	892	1.53779	0.349261	-1.58633	0.907156
	894	1.8544	0.34995	-1.68606	1.02461
	896	1.81958	0.387238	-1.32932	0.964603
	898	2.60869	0.377468	-1.4799	1.02152
	900	1.92006	0.184837	-1.75043	0.946352
	902	1.9337	0.290702	-1.67425	0.999863
	904	2.20562	0.578222	-1.92429	1.0884
	906	2.11996	0.591754	-2.61014	1.03113
	908	1.75203	0.187655	-2.16596	1.18128
	910	1.6808	0.234345	-1.9901	1.11248
	912	2.33587	0.385764	-1.63462	1.19749
	914	2.47128	0.45577	-1.53709	1.01507
	916	2.41485	0.383028	-1.28477	1.07641
	918	2.38727	0.397275	-2.15509	1.36612
	920	2.22563	0.483423	-2.05046	1.40922
	922	1.82003	0.391997	-2.60535	1.44372
	924	1.77185	0.378551	-2.4613	1.59
	926	1.86792	0.302431	-2.04369	1.62493
	928	1.89098	0.228206	-2.22688	1.42268
	930	2.08608	0.465971	-2.33147	1.44433
	932	2.40496	0.517526	-2.35413	1.3967
	934	2.49203	0.547009	-2.40578	1.40909
	936	2.3678	0.413608	-2.62821	1.52157
	938	1.90468	0.299833	-2.49621	1.66733
	940	1.80917	0.406633	-2.34393	1.38917
	942	2.02212	0.389638	-1.60348	1.30789
	944	1.94117	0.432212	-1.79906	1.07675
	946	2.12571	0.37273	-1.09319	0.984311
	948	2.33973	0.420135	-1.0341	1.0288
	950	2.158	0.33251	-1.41239	0.928323
	952	1.92392	0.633447	-1.61282	0.875235
	954	1.8051	0.571951	-1.51174	0.725244
	956	1.65065	0.572137	-1.95503	0.816906
	958	0.92113	0.744894	-2.61071	0.91211

## Sheet: Fig.1f
	Time traces						Post-training PKCδ activity
		Control (unpaired)		5x spaced			Control (unpaired)	5x spaced
	Time (s)	Mean	SEM	Mean	SEM		1.0134	1.00054
	0	-3.5883	0.542728	-2.44654	0.572222		0.994545	1.04319
	2	-2.69816	0.309822	-1.01008	0.361243		0.994197	1.02374
	4	-2.21458	0.335845	-0.493159	0.340771		0.991815	1.01783
	6	-2.27574	0.335858	-0.396569	0.355156		0.989452	1.02409
	8	-2.26921	0.349593	-0.813393	0.429162		0.987993	1.02453
	10	-1.9966	0.446227	-0.631064	0.405799		1.0217	0.996481
	12	-2.00171	0.471714	-0.536422	0.408575		1.00105	1.018
	14	-1.96923	0.418464	-0.647167	0.4425		1.00585	1.01015
	16	-2.03397	0.373793	-0.890014	0.419887			1.02566
	18	-2.11373	0.438361	-0.717195	0.473177
	20	-2.14188	0.394038	-0.458828	0.493614
	22	-2.11717	0.380935	-0.34794	0.468461
	24	-2.27687	0.397351	-0.332967	0.468248
	26	-2.21075	0.386628	-0.458647	0.55657
	28	-1.82419	0.381227	-0.490319	0.532808
	30	-1.88516	0.384883	-0.455784	0.534648
	32	-1.78614	0.318854	-0.464501	0.516279
	34	-1.77668	0.296633	-0.404871	0.566773
	36	-1.9886	0.341312	-0.115196	0.573868
	38	-2.08666	0.36326	-0.228416	0.642995
	40	-2.16286	0.418978	-0.371801	0.554815
	42	-2.07926	0.476801	-0.322792	0.426393
	44	-2.14382	0.45429	-0.607228	0.503952
	46	-2.15701	0.404951	-0.401771	0.472542
	48	-2.13503	0.364487	-0.593407	0.458171
	50	-2.22637	0.332759	-0.480224	0.425621
	52	-2.04638	0.327363	-0.581991	0.500896
	54	-1.96318	0.333498	-0.410914	0.527723
	56	-2.13394	0.424123	-0.554811	0.57176
	58	-2.12183	0.463801	-0.521629	0.529946
	60	-2.22802	0.479364	-0.434681	0.599303
	62	-2.28736	0.427845	-0.474864	0.509336
	64	-2.47251	0.387535	-0.634452	0.407236
	66	-2.57326	0.3402	-0.463472	0.456767
	68	-2.46322	0.404124	-0.361306	0.529299
	70	-2.51578	0.351233	-0.470635	0.52005
	72	-2.37591	0.349611	-0.598072	0.525962
	74	-2.34322	0.462012	-0.596871	0.563822
	76	-2.49868	0.494171	-0.496963	0.532431
	78	-2.42742	0.431041	-0.617859	0.569062
	80	-2.11569	0.388114	-0.627301	0.452373
	82	-2.05588	0.341259	-0.543427	0.455746
	84	-2.01943	0.254347	-0.464513	0.421909
	86	-2.13304	0.258088	-0.312691	0.402202
	88	-1.99981	0.278129	-0.321811	0.464772
	90	-2.12593	0.39397	-0.320128	0.435732
	92	-2.18842	0.39277	-0.508106	0.447859
	94	-2.28493	0.291543	-0.480647	0.360965
	96	-2.36621	0.430976	-0.644309	0.427664
	98	-2.47499	0.392019	-0.422083	0.410695
	100	-2.20782	0.278838	-0.539448	0.448957
	102	-2.06458	0.318405	-0.512266	0.461494
	104	-1.98102	0.369117	-0.47029	0.462585
	106	-1.78536	0.463628	-0.340876	0.422267
	108	-1.48279	0.595179	-0.528133	0.505367
	110	-1.27082	0.73057	-0.520844	0.399302
	112	-0.838609	0.734674	-0.273488	0.477527
	114	-0.404945	0.633386	0.518582	0.470247
	116	0.125831	0.390003	0.803986	0.50806
	118	0.662154	0.220361	1.02512	0.611794
	120	0.139917	0.318521	1.13481	0.610016
	122	-1.02453	0.49575	0.875832	0.610383
	124	-1.32364	0.454875	0.104253	0.419702
	126	-1.45427	0.432013	-0.419352	0.374878
	128	-1.69673	0.32844	-0.539181	0.404545
	130	-1.68332	0.317824	-0.640317	0.509188
	132	-1.62381	0.308926	-0.664253	0.460872
	134	-1.73198	0.28032	-0.818336	0.469013
	136	-1.82287	0.212551	-0.737933	0.457132
	138	-1.82567	0.24195	-0.853299	0.47477
	140	-2.14198	0.229113	-0.795425	0.474764
	142	-1.73648	0.258721	-0.727162	0.430951
	144	-1.34954	0.190695	-0.620524	0.514475
	146	-1.21773	0.197001	-0.601336	0.499848
	148	-1.24753	0.166131	-0.400878	0.386348
	150	-1.0667	0.233983	-0.308009	0.456852
	152	-1.13262	0.290227	-0.279542	0.399318
	154	-0.944491	0.324669	-0.382048	0.41879
	156	-0.938358	0.31543	-0.343675	0.316452
	158	-0.953719	0.284727	-0.158593	0.384474
	160	-0.714725	0.322297	-0.364285	0.343532
	162	-0.501083	0.211541	-0.418064	0.321415
	164	-0.665731	0.252301	-0.21675	0.353148
	166	-0.613541	0.257903	-0.219417	0.347371
	168	-0.477803	0.343239	-0.138731	0.317125
	170	-0.596345	0.292152	-0.0813516	0.380246
	172	-0.795666	0.299419	-0.132781	0.310882
	174	-0.54111	0.300671	-0.0682789	0.311827
	176	-0.631431	0.258406	-0.0768159	0.313928
	178	-0.599787	0.253023	-0.140677	0.307016
	180	-0.474024	0.262379	-0.0208569	0.310372
	182	-0.208319	0.317206	-0.0250111	0.368886
	184	-0.143054	0.305393	-0.309845	0.34175
	186	-0.33474	0.348638	-0.26624	0.360424
	188	-0.433479	0.277133	-0.353391	0.426881
	190	-0.486466	0.340211	-0.236523	0.397165
	192	-0.448556	0.307879	-0.339088	0.39347
	194	-0.358322	0.341392	-0.19525	0.416358
	196	-0.259948	0.29417	-0.295465	0.349507
	198	-0.0284533	0.238186	-0.0462928	0.485357
	200	0.0339338	0.200866	-0.178886	0.424781
	202	0.120211	0.172448	-0.451931	0.455171
	204	0.0388249	0.234404	-0.195185	0.415567
	206	-0.0208281	0.265115	-0.238556	0.411439
	208	-0.0978962	0.261468	-0.221993	0.360092
	210	-0.28285	0.280901	-0.193595	0.328284
	212	-0.0125233	0.312726	-0.158951	0.289218
	214	-0.215956	0.31541	-0.183643	0.312654
	216	-0.0608662	0.348344	-0.384469	0.329999
	218	-0.106054	0.372632	-0.190849	0.256742
	220	0.0271541	0.371051	0.135614	0.188025
	222	-0.0986188	0.385868	0.152404	0.392193
	224	0.192791	0.330597	0.191513	0.364634
	226	-0.0313224	0.415421	0.22141	0.327487
	228	-0.178007	0.395708	0.0252956	0.263401
	230	-0.365205	0.385481	-0.0808429	0.363781
	232	-0.4275	0.349007	0.0135787	0.317752
	234	-0.164751	0.432391	0.0886819	0.302785
	236	0.224821	0.367071	-0.0148728	0.334088
	238	0.367342	0.334213	0.133618	0.358274
	240	0.485936	0.25792	-0.0965236	0.300454
	242	0.409197	0.286513	-0.126512	0.250716
	244	0.293069	0.279341	-0.121103	0.280732
	246	0.289579	0.254969	0.142173	0.270271
	248	-0.219338	0.231152	0.351123	0.315436
	250	-0.0518536	0.252797	0.507763	0.377886
	252	0.00443825	0.262417	0.35238	0.377759
	254	0.199202	0.197814	0.479081	0.273384
	256	0.00242495	0.236744	0.0315281	0.27477
	258	0.0333138	0.151957	-0.078979	0.343829
	260	-0.00714575	0.141476	-0.175927	0.280667
	262	0.064043	0.146553	-0.193912	0.244912
	264	0.0161781	0.260573	-0.280803	0.316906
	266	0.126578	0.308318	-0.0730834	0.398587
	268	0.00969308	0.349182	-0.0834173	0.379822
	270	0.0983484	0.400309	0.0911946	0.507879
	272	0.499495	0.402329	0.00970258	0.494937
	274	0.335589	0.439971	0.134683	0.470828
	276	0.235734	0.517122	0.30901	0.342808
	278	0.478592	0.519298	0.121768	0.370261
	280	0.357277	0.43855	0.0726667	0.34414
	282	0.19584	0.362677	0.140335	0.39092
	284	0.396414	0.440142	-0.0219135	0.29564
	286	0.40124	0.418793	-0.133991	0.382146
	288	0.1043	0.451508	-0.125019	0.412436
	290	0.136543	0.428446	0.0197296	0.34753
	292	-0.126649	0.396066	-0.0501973	0.376475
	294	0.0449253	0.417526	-0.0369571	0.38306
	296	-0.14439	0.243028	-0.162271	0.335323
	298	-0.254482	0.190013	-0.206163	0.246838
	300	-0.266505	0.262052	-0.296546	0.263266
	302	-0.110782	0.210032	-0.227958	0.282097
	304	-0.176856	0.317783	-0.161932	0.287868
	306	0.0391379	0.395989	-0.312582	0.234582
	308	0.172181	0.380307	-0.347891	0.251042
	310	0.442959	0.308827	-0.461787	0.261678
	312	0.39794	0.29125	-0.340517	0.246531
	314	0.0874482	0.253604	-0.354183	0.269605
	316	-0.0347205	0.207196	-0.255312	0.320196
	318	0.0408926	0.113456	-0.456693	0.327057
	320	-0.227619	0.208307	-0.200447	0.249907
	322	-0.252484	0.189302	-0.402642	0.235321
	324	-0.0939571	0.345634	-0.279823	0.270254
	326	-0.15373	0.231948	-0.400449	0.218874
	328	-0.00500348	0.255867	-0.0438338	0.170515
	330	0.0582793	0.142262	0.0370104	0.191935
	332	-0.138162	0.279311	0.0711738	0.206383
	334	-0.201794	0.31088	-0.186357	0.179002
	336	0.160964	0.307046	-0.0758557	0.242418
	338	-0.17804	0.269647	-0.222628	0.251928
	340	-0.157973	0.334337	-0.334958	0.311394
	342	-0.386706	0.283587	-0.25744	0.266513
	344	-0.242975	0.256954	-0.247935	0.253648
	346	-0.3447	0.255398	-0.348083	0.263255
	348	-0.306349	0.276373	-0.337415	0.26506
	350	-0.415374	0.276015	-0.228485	0.270007
	352	-0.525657	0.303795	-0.258951	0.284201
	354	-0.703138	0.349	-0.088228	0.353515
	356	-0.695917	0.301406	-0.272211	0.382869
	358	-0.655661	0.244717	-0.368994	0.372324
	360	-0.314702	0.207842	-0.512131	0.361703
	362	-0.0973757	0.152648	-0.357861	0.448092
	364	0.162636	0.307671	-0.350114	0.293421
	366	-0.0413298	0.311276	-0.42606	0.264801
	368	-0.221251	0.190993	-0.0988907	0.262555
	370	-0.288889	0.161948	-0.0409504	0.210696
	372	-0.137915	0.342117	0.102348	0.205011
	374	-0.379766	0.150105	0.144148	0.218811
	376	-0.198495	0.176211	0.105214	0.320045
	378	-0.28567	0.159594	0.0832912	0.30752
	380	-0.246977	0.185244	0.0689178	0.263625
	382	-0.288869	0.128365	-0.0536462	0.250949
	384	-0.240714	0.131848	-0.14873	0.160339
	386	-0.340301	0.11552	-0.55175	0.201432
	388	-0.198835	0.192426	-0.377557	0.253025
	390	-0.137732	0.137584	-0.343245	0.277946
	392	-0.130365	0.147595	-0.286924	0.254232
	394	-0.124669	0.199243	-0.121509	0.35796
	396	-0.0971379	0.236945	-0.0759743	0.244283
	398	-0.197367	0.209984	-0.26401	0.308891
	400	-0.502631	0.167235	-0.494084	0.255495
	402	-0.451201	0.215749	-0.47974	0.219789
	404	-0.56275	0.164702	-0.607713	0.274121
	406	-0.60157	0.139337	-0.514801	0.260885
	408	-0.601585	0.0869934	-0.388098	0.26968
	410	-0.487045	0.178621	-0.282701	0.253381
	412	-0.600682	0.22916	0.0933401	0.337178
	414	-0.573287	0.246813	-0.0529188	0.362893
	416	-0.683919	0.306221	-0.00341716	0.33873
	418	-0.732849	0.272475	-0.0184194	0.230532
	420	-0.86442	0.288263	-0.194577	0.257311
	422	-0.546471	0.276975	-0.321298	0.310747
	424	-0.364654	0.285242	-0.0565501	0.341941
	426	-0.307451	0.282485	-0.314373	0.258813
	428	-0.173557	0.373672	-0.289141	0.287691
	430	-0.152014	0.278413	-0.0403614	0.258519
	432	-0.157777	0.277163	-0.00403587	0.231112
	434	-0.156135	0.232978	-0.202892	0.195932
	436	0.0349235	0.294936	-0.152913	0.225044
	438	0.0257745	0.170049	-0.358144	0.252528
	440	0.109776	0.180957	-0.364507	0.251767
	442	0.0689494	0.186097	-0.0602559	0.298557
	444	-0.222328	0.13826	0.0168151	0.269839
	446	-0.376392	0.13933	0.0456449	0.249735
	448	-0.317407	0.183905	-0.00133698	0.215622
	450	-0.381862	0.181003	0.0372581	0.320248
	452	-0.266201	0.242773	0.0755291	0.334561
	454	-0.111766	0.234519	-0.06089	0.22273
	456	0.092324	0.205942	-0.138887	0.219853
	458	0.1903	0.214656	-0.19191	0.177325
	460	-0.231612	0.272629	0.0411745	0.196013
	462	-0.125923	0.305678	-0.0368238	0.168503
	464	0.0413546	0.132429	0.0858372	0.225787
	466	-0.0337702	0.218794	-0.0563293	0.220013
	468	-0.118205	0.239482	0.183516	0.224494
	470	-0.104808	0.23212	0.0528195	0.249296
	472	-0.387784	0.185851	0.111254	0.243493
	474	-0.268068	0.249948	0.333346	0.249679
	476	-0.34462	0.171433	0.249304	0.283863
	478	0.0850509	0.189881	0.0306692	0.225976
	480	-0.147514	0.130618	-0.168304	0.25386
	482	-0.0399717	0.147655	-0.142102	0.182348
	484	-0.124961	0.239175	-0.136916	0.185371
	486	0.0379671	0.222694	0.0550258	0.258689
	488	-0.237581	0.212139	-0.152541	0.108717
	490	-0.271423	0.233688	-0.117365	0.120217
	492	-0.14203	0.186507	-0.145588	0.216557
	494	-0.107775	0.209651	-0.493169	0.17372
	496	-0.0221481	0.206187	-0.406197	0.242093
	498	0.144466	0.262439	-0.370143	0.216788
	500	-0.066298	0.175779	-0.245143	0.261893
	502	-0.0133012	0.178544	-0.452095	0.268212
	504	0.0369447	0.230528	-0.118865	0.24029
	506	-0.179799	0.18259	-0.102724	0.3175
	508	-0.0710617	0.231475	-0.454011	0.275616
	510	-0.044134	0.216172	-0.461515	0.244394
	512	-0.140205	0.179216	-0.213	0.215172
	514	-0.242854	0.175976	-0.491675	0.173546
	516	-0.260445	0.142317	-0.379628	0.142708
	518	-0.304241	0.207359	-0.5395	0.124042
	520	-0.294349	0.210535	-0.348146	0.188725
	522	-0.269101	0.161137	-0.482598	0.200085
	524	-0.260127	0.225269	-0.237443	0.244987
	526	-0.0595506	0.132051	0.21501	0.191259
	528	0.101059	0.165321	0.289386	0.25925
	530	0.258806	0.268886	0.266873	0.191442
	532	0.101079	0.198168	0.235722	0.21825
	534	0.227567	0.280096	0.0880173	0.24682
	536	0.00352893	0.17762	-0.289931	0.2686
	538	-0.0938902	0.182165	-0.562203	0.317585
	540	-0.110411	0.191328	-0.277265	0.226605
	542	-0.198679	0.199986	-0.451716	0.166914
	544	-0.254433	0.230819	-0.391024	0.162731
	546	-0.339414	0.207489	0.0712093	0.173231
	548	-0.356205	0.245667	0.0651647	0.200794
	550	-0.0913979	0.264334	0.093979	0.166576
	552	0.0400657	0.288521	0.427303	0.188493
	554	-0.120883	0.219449	0.255634	0.201931
	556	-0.0480161	0.247128	0.0510711	0.147433
	558	-0.0301848	0.216763	0.0645821	0.202702
	560	-0.129483	0.136946	-0.25076	0.248476
	562	-0.320632	0.181561	-0.234298	0.202342
	564	0.0615798	0.225226	0.0544075	0.229435
	566	-0.104459	0.203364	-0.0459104	0.193522
	568	-0.203167	0.240184	-0.133158	0.210293
	570	-0.188276	0.222252	0.00355422	0.239441
	572	-0.293113	0.209813	0.0350078	0.24311
	574	-0.444659	0.348395	-0.0940261	0.270563
	576	-0.349868	0.281469	-0.02108	0.199988
	578	-0.338443	0.315406	-0.231467	0.18663
	580	-0.12143	0.291085	-0.135167	0.214022
	582	-0.0512037	0.269095	-0.254176	0.284734
	584	-0.308533	0.146952	-0.158598	0.230872
	586	-0.293582	0.1773	-0.0382432	0.186844
	588	-0.328357	0.191551	0.0602052	0.159848
	590	-0.213592	0.142348	0.211709	0.1824
	592	-0.480244	0.167181	0.0885403	0.198789
	594	-0.444502	0.225822	0.0988896	0.214902
	596	-0.40663	0.27095	0.0449059	0.196155
	598	-0.46701	0.2403	-0.0781359	0.177015
	600	-0.298135	0.221655	-0.124263	0.21021
	602	-0.10424	0.138782	-0.0994726	0.185088
	604	-0.178057	0.177323	-0.26225	0.21298
	606	-0.223156	0.174352	-0.13326	0.159763
	608	-0.162824	0.137847	0.101057	0.24164
	610	-0.0833377	0.190134	-0.0115557	0.251188
	612	-0.0443112	0.21556	0.224395	0.216933
	614	-0.260837	0.245226	0.156408	0.198004
	616	0.0735416	0.27905	-0.125388	0.226039
	618	-0.11856	0.248003	0.0343612	0.240097
	620	-0.232504	0.208442	-0.234755	0.197353
	622	-0.154495	0.262447	-0.0454921	0.20923
	624	-0.166924	0.184768	0.104039	0.181677
	626	-0.0970057	0.243061	0.344451	0.238837
	628	0.0750128	0.342783	0.226751	0.256927
	630	0.0541369	0.387047	0.198261	0.27786
	632	0.0379325	0.281157	0.119373	0.255014
	634	0.0745265	0.270677	-0.0112877	0.253152
	636	0.0976625	0.15164	-0.162793	0.294068
	638	0.0287069	0.0882376	0.00688806	0.186509
	640	-0.104364	0.153946	0.108243	0.195418
	642	-0.00126167	0.155919	0.0895461	0.214712
	644	-0.397094	0.155473	-0.00717068	0.222709
	646	-0.248563	0.162443	-0.278866	0.312148
	648	-0.181525	0.177955	-0.318102	0.251354
	650	-0.0682804	0.162133	-0.334679	0.21598
	652	0.0299058	0.104002	-0.242631	0.244721
	654	0.142931	0.0870416	-0.273021	0.233505
	656	0.148942	0.152534	0.155391	0.309171
	658	0.282976	0.190834	-0.00788424	0.156414
	660	0.33021	0.232088	0.0904635	0.167559
	662	0.200941	0.160105	-0.0880497	0.184987
	664	-0.0244779	0.179679	0.0201279	0.236271
	666	-0.0569863	0.224274	0.104085	0.333549
	668	0.0356284	0.287924	0.168654	0.288657
	670	0.0842541	0.262894	0.120106	0.301342
	672	-0.0135455	0.148383	-0.0617732	0.273506
	674	0.199663	0.0807711	0.229011	0.213096
	676	0.550134	0.215509	0.00594546	0.233563
	678	0.207777	0.214032	0.0290137	0.160565
	680	0.134445	0.316472	0.00465182	0.213569
	682	0.204837	0.314756	-0.102299	0.2114
	684	0.493012	0.34981	-0.232433	0.1744
	686	0.426953	0.234904	-0.163247	0.224099
	688	0.659975	0.196538	-0.169635	0.246258
	690	0.348749	0.120363	-0.00492467	0.153543
	692	0.46143	0.190952	0.192205	0.197637
	694	0.0819802	0.189763	0.29351	0.14298
	696	-0.0455234	0.160275	0.439035	0.183366
	698	-0.225947	0.192834	0.521574	0.311612
	700	-0.266797	0.234288	0.347207	0.25662
	702	-0.126217	0.239262	0.525128	0.192127
	704	0.0283982	0.299614	0.210686	0.185672
	706	-0.235203	0.241071	-0.0136993	0.297715
	708	-0.15375	0.262403	0.0869752	0.243298
	710	0.0598424	0.162589	0.159856	0.245316
	712	0.129639	0.287715	0.0847802	0.270286
	714	-0.124043	0.180921	0.436704	0.233311
	716	-0.0617721	0.131347	0.47952	0.247193
	718	0.0572912	0.139593	-0.00407127	0.281561
	720	0.0442027	0.138661	0.258656	0.262534
	722	0.126171	0.17051	0.193913	0.242526
	724	-0.103295	0.281473	0.081286	0.24685
	726	0.0173714	0.312744	-0.172092	0.21356
	728	-0.0167507	0.272701	-0.243689	0.212153
	730	-0.143838	0.0897834	0.0479639	0.152769
	732	-0.00299377	0.138323	0.0164925	0.197303
	734	0.396802	0.236971	-0.103338	0.217787
	736	0.106741	0.151423	-0.0960116	0.214846
	738	0.174679	0.171493	-0.0618709	0.232674
	740	0.426662	0.253908	-0.183723	0.200241
	742	0.264443	0.294127	-0.330561	0.245339
	744	0.15138	0.284006	-0.0742187	0.232871
	746	0.220359	0.310929	-0.0329295	0.141358
	748	0.174824	0.289374	0.0268814	0.173006
	750	0.180875	0.201988	0.11066	0.138546
	752	0.445603	0.16474	0.206503	0.139098
	754	0.333199	0.161492	0.193131	0.199948
	756	0.356151	0.156242	0.0347727	0.16574
	758	0.182945	0.0868173	0.0808684	0.151639
	760	0.247029	0.184506	0.225823	0.16793
	762	0.270521	0.231287	0.085969	0.219428
	764	0.452758	0.204611	0.246837	0.20306
	766	0.208546	0.213602	0.0731207	0.292795
	768	0.147817	0.316927	0.0641262	0.195141
	770	0.0147818	0.250214	0.00404545	0.143445
	772	-0.0723525	0.273392	0.238108	0.160974
	774	0.0900906	0.320914	0.136561	0.208407
	776	0.00377503	0.258372	0.027029	0.208923
	778	0.0445807	0.220796	-0.0202397	0.140843
	780	0.222171	0.204291	-0.0605819	0.216625
	782	0.0527978	0.175378	-0.000905768	0.187117
	784	0.0382059	0.184984	0.104787	0.16377
	786	0.0843324	0.147129	0.0811817	0.144845
	788	-0.0405546	0.167791	0.046993	0.219136
	790	-0.0939864	0.20277	0.0313081	0.200486
	792	-0.13324	0.253837	-0.0849786	0.226954
	794	-0.018663	0.243983	-0.141961	0.229528
	796	0.117571	0.183331	-0.181284	0.1547
	798	0.0341755	0.160534	-0.191692	0.218304
	800	0.316026	0.214869	-0.072853	0.187399
	802	0.351024	0.194204	0.139963	0.234338
	804	0.144615	0.190408	0.268979	0.157151
	806	0.0342067	0.33124	0.237401	0.232207
	808	0.164683	0.407837	0.305886	0.191176
	810	0.207707	0.3932	-0.0855438	0.239655
	812	0.100167	0.309993	-0.466204	0.241841
	814	0.093107	0.372605	-0.120868	0.289443
	816	-0.233409	0.328925	-0.266873	0.282882
	818	-0.122433	0.263696	-0.104152	0.286994
	820	-0.253728	0.226904	0.0712671	0.231444
	822	-0.0553423	0.193089	0.0758712	0.269358
	824	0.0147365	0.140966	0.156913	0.19218
	826	0.167946	0.164304	0.190234	0.12741
	828	0.299833	0.188054	0.168859	0.137115
	830	0.440731	0.232539	0.101185	0.117407
	832	0.285044	0.208487	0.070948	0.123961
	834	0.205368	0.149137	-0.0120714	0.159182
	836	0.134572	0.160573	-0.212305	0.204595
	838	0.1417	0.194308	-0.0657475	0.221724
	840	0.0545067	0.14572	-0.14195	0.288427
	842	0.189862	0.101927	0.0589413	0.224491
	844	0.00197553	0.0827145	0.247288	0.153822
	846	-0.0239787	0.14537	0.26187	0.104092
	848	0.0338907	0.20183	0.23253	0.136662
	850	-0.143866	0.186984	-0.0964734	0.233198
	852	0.00481959	0.194348	-0.351892	0.24789
	854	0.1296	0.142213	-0.0780989	0.220298
	856	0.00704402	0.212433	-0.209963	0.233075
	858	0.0195164	0.377672	-0.192773	0.238982
	860	0.189028	0.36685	-0.116908	0.208991
	862	0.149325	0.274917	0.184722	0.216707
	864	0.193967	0.15508	-0.0996738	0.289563
	866	0.0972552	0.170734	0.000517645	0.368176
	868	0.191668	0.206696	0.0437285	0.302443
	870	0.14864	0.234582	0.102373	0.281017
	872	-0.103513	0.284688	0.127132	0.277161
	874	0.0499875	0.246137	-0.103063	0.297841
	876	0.294146	0.258202	-0.129642	0.335048
	878	0.364268	0.238904	-0.241413	0.280526
	880	0.467019	0.244253	-0.146444	0.172434
	882	0.580461	0.323656	-0.282551	0.171309
	884	0.486852	0.292924	-0.104512	0.156982
	886	0.485882	0.232667	0.0776649	0.197377
	888	0.355059	0.210905	0.267035	0.192953
	890	0.275342	0.197028	0.660838	0.212038
	892	0.414714	0.126059	0.656056	0.160381
	894	0.493426	0.105194	0.729402	0.166672
	896	0.298039	0.108073	0.400024	0.19499
	898	0.49871	0.163875	0.270503	0.232177
	900	0.386848	0.202073	0.108018	0.288904
	902	0.255032	0.133519	0.106491	0.354295
	904	0.157048	0.253586	0.0511143	0.295811
	906	0.143529	0.304038	0.200468	0.331999
	908	0.017603	0.217648	0.385308	0.361329
	910	-0.0273899	0.224	0.230823	0.214187
	912	-0.00805622	0.270228	0.0157645	0.164387
	914	0.116134	0.169322	0.214085	0.22932
	916	-5.50239e-05	0.175521	-0.059962	0.162813
	918	-0.0249917	0.156497	-0.10677	0.247353
	920	-0.00949911	0.201059	0.150434	0.190476
	922	0.139667	0.282938	0.144179	0.126541
	924	0.30089	0.304269	0.324961	0.128688
	926	0.25912	0.236454	0.433454	0.183929
	928	0.164499	0.162067	0.617606	0.161607
	930	0.0708961	0.253677	0.537947	0.275708
	932	0.422814	0.203522	0.586171	0.409503
	934	0.287505	0.233401	0.475833	0.324276
	936	0.293166	0.218987	0.359367	0.255068
	938	0.160706	0.188824	0.254652	0.295826
	940	0.365378	0.24666	0.248102	0.302729
	942	0.129275	0.166157	0.0560581	0.349351
	944	0.183562	0.269477	0.0100979	0.400986
	946	0.344121	0.23632	-0.129092	0.288055
	948	0.373718	0.208669	-0.0568408	0.245805
	950	0.33738	0.112315	0.0714022	0.227163
	952	0.569244	0.144549	0.181385	0.191491
	954	0.480722	0.21061	0.439897	0.21606
	956	-0.165176	0.221674	-0.132272	0.249904
	958	-0.810314	0.334716	-1.07925	0.354501

## Sheet: Fig.1g
	Time traces						Post-training PKCδ activity
		Control (unpaired)		5x massed			Control (unpaired)	5x massed
	Time (s)	Mean	SEM	Mean	SEM		0.97044	1.00379
	0	-4.29264	0.43281	-3.70447	0.264493		1.01097	1.01354
	2	-3.57092	0.442725	-2.891	0.384756		0.996006	1.00458
	4	-3.28025	0.462388	-2.47978	0.40349		1.00591	0.998264
	6	-3.144	0.503375	-2.60516	0.418154		0.999621	1.00243
	8	-3.13486	0.535968	-2.47021	0.452847		1.00492	0.991112
	10	-3.02514	0.503037	-2.55491	0.401125		1.00735	0.999852
	12	-2.93846	0.532177	-2.41357	0.317279		1.00479	0.999701
	14	-2.71509	0.586515	-2.53314	0.295019
	16	-2.63987	0.535503	-2.41431	0.334289
	18	-2.74154	0.491338	-2.6026	0.276429
	20	-2.71533	0.588056	-2.61542	0.227446
	22	-2.90513	0.632473	-2.8338	0.158687
	24	-3.01091	0.505286	-2.68825	0.254443
	26	-2.97694	0.50087	-2.4833	0.289702
	28	-2.9999	0.542838	-2.63434	0.285516
	30	-2.9283	0.517431	-2.62273	0.347181
	32	-2.83951	0.505354	-2.61356	0.253182
	34	-2.87753	0.550718	-2.80202	0.24472
	36	-3.10545	0.45827	-3.00503	0.284482
	38	-2.88288	0.485589	-2.90041	0.289541
	40	-2.69707	0.455359	-2.83232	0.304688
	42	-2.71458	0.482646	-2.9071	0.296781
	44	-2.86491	0.384815	-2.64359	0.293503
	46	-2.71595	0.416829	-2.37428	0.278233
	48	-2.74422	0.389901	-2.43086	0.273838
	50	-2.76754	0.433297	-2.53326	0.291397
	52	-2.82906	0.314417	-2.58579	0.319118
	54	-2.63387	0.394203	-2.71626	0.223681
	56	-2.76513	0.422347	-3.03712	0.214092
	58	-2.61156	0.418762	-3.05188	0.232274
	60	-2.51604	0.417996	-3.06402	0.136028
	62	-2.73864	0.446425	-3.03398	0.275678
	64	-2.57333	0.461625	-2.991	0.33223
	66	-2.63328	0.467765	-2.8376	0.341901
	68	-2.68153	0.454092	-2.76116	0.239486
	70	-3.01578	0.436055	-2.54353	0.377148
	72	-3.02966	0.445996	-2.4109	0.297663
	74	-2.88805	0.484487	-2.55513	0.202295
	76	-2.92501	0.471678	-2.597	0.304823
	78	-2.81555	0.449362	-2.75235	0.336355
	80	-2.84347	0.427913	-2.96438	0.349451
	82	-2.92182	0.410522	-2.96492	0.204265
	84	-2.88841	0.327189	-3.10214	0.249573
	86	-2.85295	0.441203	-2.85407	0.334144
	88	-2.88648	0.370803	-2.99383	0.311788
	90	-2.55146	0.36457	-2.64497	0.390646
	92	-2.74534	0.442437	-2.50282	0.373968
	94	-2.68596	0.47269	-2.3052	0.196512
	96	-2.78392	0.42602	-2.61573	0.231811
	98	-2.85602	0.535759	-2.45494	0.290334
	100	-2.96296	0.504938	-2.53634	0.281531
	102	-2.86853	0.483405	-2.62909	0.306353
	104	-3.03835	0.487204	-2.77287	0.342745
	106	-2.96616	0.479619	-2.59554	0.306857
	108	-2.74908	0.501359	-2.78213	0.235351
	110	-2.56714	0.514537	-2.58228	0.275048
	112	-2.49773	0.530141	-2.72212	0.214664
	114	-2.8505	0.510193	-2.75633	0.233199
	116	-2.96008	0.504449	-2.73472	0.255357
	118	-3.15338	0.500051	-2.69195	0.380369
	120	-3.15929	0.571353	-3.35312	0.446357
	122	-3.31749	0.30337	-3.95834	0.727596
	124	-3.24551	0.233804	-4.21236	0.931948
	126	-3.16798	0.222265	-4.21267	0.814692
	128	-3.55131	0.265045	-4.24934	0.886077
	130	-3.71067	0.296428	-4.44537	0.852632
	132	-3.49215	0.344516	-4.08279	0.945363
	134	-3.44063	0.41658	-4.22015	0.90425
	136	-3.45319	0.294552	-3.95375	0.97713
	138	-3.09653	0.356045	-3.99503	0.916352
	140	-2.79859	0.242948	-3.96552	0.916353
	142	-2.8562	0.240896	-4.12031	0.899281
	144	-2.84192	0.213425	-4.14402	0.9034
	146	-2.75995	0.278736	-3.79908	0.838605
	148	-3.0078	0.366694	-4.10033	0.852833
	150	-3.24573	0.437044	-4.0619	0.883817
	152	-3.23997	0.451715	-4.05177	0.757508
	154	-2.84287	0.442347	-3.63208	0.703134
	156	-2.92288	0.360823	-3.49153	0.709822
	158	-2.49254	0.351912	-3.29693	0.738518
	160	-2.46605	0.399609	-3.24647	0.715037
	162	-2.21739	0.376666	-3.55579	0.755028
	164	-2.00372	0.452654	-3.62062	0.810595
	166	-1.85513	0.482136	-3.48675	0.842018
	168	-2.10058	0.572571	-3.43489	0.879854
	170	-1.93909	0.55696	-3.26281	0.9309
	172	-1.79722	0.606858	-3.29223	0.897431
	174	-1.72544	0.630271	-3.06563	0.822205
	176	-1.68451	0.443637	-3.10439	0.81376
	178	-1.73438	0.40141	-3.45067	0.781708
	180	-1.99303	0.463362	-3.38241	0.938545
	182	-1.85516	0.615265	-3.15234	0.812284
	184	-2.04397	0.731155	-3.16027	0.841006
	186	-1.94893	0.982909	-2.88008	0.990275
	188	-2.1564	1.12011	-2.7014	0.881171
	190	-1.96118	1.05569	-2.38198	0.82433
	192	-2.12288	1.03704	-2.43181	0.80002
	194	-2.31409	1.02463	-2.27475	0.779495
	196	-1.97677	0.662716	-2.24832	0.759311
	198	-2.00457	0.485607	-2.11616	0.685362
	200	-1.95587	0.474174	-2.10714	0.727769
	202	-1.76537	0.488387	-2.03339	0.704814
	204	-1.22132	0.385212	-1.7179	0.538037
	206	-1.11986	0.406253	-1.58459	0.582873
	208	-1.05648	0.440666	-1.61458	0.562597
	210	-1.11939	0.450352	-1.75374	0.529007
	212	-0.942396	0.426552	-1.84016	0.448411
	214	-1.01623	0.42049	-1.8074	0.450201
	216	-0.824104	0.379336	-1.82431	0.482801
	218	-0.547721	0.221921	-1.69894	0.496997
	220	-0.537263	0.251719	-1.59515	0.648641
	222	-0.374961	0.236708	-1.62692	0.653627
	224	-0.126242	0.257951	-1.49854	0.570494
	226	-0.0249114	0.265746	-1.19626	0.625618
	228	-0.00370862	0.289435	-1.28635	0.644138
	230	0.0248236	0.258253	-1.05015	0.632067
	232	0.103211	0.284687	-1.13817	0.590445
	234	0.108481	0.294249	-1.26446	0.62438
	236	0.0691291	0.255762	-1.43346	0.567025
	238	0.257029	0.296832	-1.25698	0.571233
	240	0.157581	0.360009	-1.39534	0.628364
	242	0.0959023	0.330282	-1.19853	0.591201
	244	0.192511	0.282159	-1.21343	0.572348
	246	0.249027	0.305046	-1.49132	0.564337
	248	0.0671439	0.263077	-1.60328	0.541543
	250	0.202991	0.199053	-1.48574	0.552667
	252	0.359301	0.231893	-1.43649	0.517696
	254	0.44234	0.280264	-1.15635	0.591693
	256	0.412978	0.271061	-1.00966	0.625016
	258	0.375207	0.21947	-0.812842	0.692928
	260	0.262904	0.120651	-0.776325	0.664267
	262	0.185851	0.214319	-0.794782	0.798879
	264	0.143602	0.262285	-0.888606	0.691859
	266	0.1701	0.222616	-0.791611	0.570621
	268	0.056201	0.232214	-0.739008	0.615421
	270	-0.0714509	0.355307	-0.766068	0.728117
	272	0.105394	0.310809	-0.941976	0.528569
	274	-0.00153548	0.389328	-0.84448	0.422305
	276	0.0892121	0.32202	-0.683014	0.456798
	278	0.228012	0.342906	-0.985789	0.549909
	280	0.0421221	0.389348	-0.946511	0.402903
	282	0.0429405	0.351001	-0.986081	0.401214
	284	0.245594	0.332131	-1.10118	0.377845
	286	0.135319	0.332395	-1.15195	0.332105
	288	0.34361	0.31254	-1.08362	0.383589
	290	0.247321	0.292867	-0.870577	0.351871
	292	0.18121	0.305075	-0.799421	0.319331
	294	0.148395	0.272509	-0.728041	0.398331
	296	0.241352	0.383601	-0.693658	0.393474
	298	0.325697	0.400895	-0.684735	0.384349
	300	0.131326	0.30693	-0.488523	0.522986
	302	0.17553	0.278297	-0.521357	0.493935
	304	0.134516	0.367213	-0.274698	0.439113
	306	0.079696	0.332509	-0.453556	0.405891
	308	-0.0561788	0.346879	-0.351082	0.432914
	310	-0.173303	0.32799	-0.345618	0.401467
	312	-0.19687	0.398349	-0.252548	0.384473
	314	-0.345299	0.340488	-0.586938	0.409004
	316	-0.301947	0.33362	-0.684444	0.454523
	318	-0.199761	0.328562	-0.67216	0.434367
	320	-0.129365	0.322865	-0.686393	0.611902
	322	-0.242161	0.322731	-0.861176	0.572666
	324	-0.175322	0.301693	-0.831185	0.46516
	326	-0.1295	0.31001	-0.481857	0.393592
	328	-0.183563	0.23281	-0.49351	0.392676
	330	-0.00888615	0.241189	-0.552706	0.263997
	332	0.147833	0.170426	-0.390342	0.287261
	334	0.241584	0.22254	-0.0947025	0.30766
	336	0.500301	0.258847	-0.282727	0.377394
	338	0.101396	0.261792	-0.437943	0.401075
	340	0.0706238	0.341076	-0.618317	0.445626
	342	0.0217595	0.302624	-0.670373	0.444266
	344	-0.115353	0.266452	-0.685943	0.333398
	346	-0.245729	0.288153	-0.352857	0.325729
	348	-0.123081	0.274537	-0.292598	0.3229
	350	-0.163345	0.248644	-0.236319	0.321573
	352	-0.0900201	0.190915	-0.123679	0.228315
	354	-0.134141	0.211733	-0.118907	0.184013
	356	-0.316725	0.219764	-0.340816	0.162764
	358	-0.404208	0.195167	-0.288932	0.194556
	360	-0.474014	0.18947	-0.244515	0.222649
	362	-0.770907	0.218354	-0.417063	0.246962
	364	-0.571486	0.225834	-0.275857	0.225588
	366	-0.399407	0.290544	-0.0122587	0.209733
	368	-0.0109155	0.282721	-0.0879449	0.228712
	370	-0.254278	0.244789	-0.0972633	0.31221
	372	-0.103986	0.266489	-0.433088	0.384469
	374	-0.100411	0.263893	-0.565285	0.364851
	376	-0.125486	0.262675	-0.760169	0.286278
	378	-0.162385	0.273523	-0.795774	0.22656
	380	0.0179296	0.212382	-0.72092	0.144896
	382	0.0332027	0.188758	-0.770277	0.150143
	384	0.0163684	0.185948	-0.710801	0.183618
	386	-0.29381	0.178418	-0.356702	0.216302
	388	-0.318533	0.196002	-0.346785	0.235431
	390	-0.322466	0.227616	-0.285884	0.372497
	392	-0.162193	0.236558	0.135017	0.328763
	394	-0.108827	0.202661	-0.165626	0.275313
	396	0.0054808	0.154335	-0.107882	0.204336
	398	-0.0699192	0.232005	-0.272099	0.138922
	400	-0.0652825	0.234251	-0.335733	0.205719
	402	-0.26591	0.197287	-0.0862684	0.151815
	404	-0.0650987	0.202052	-0.29584	0.179173
	406	-0.176986	0.158332	-0.30131	0.204295
	408	-0.178539	0.197409	-0.412602	0.152806
	410	-0.301334	0.236485	-0.431036	0.175146
	412	-0.369836	0.243709	-0.419391	0.178406
	414	-0.369434	0.313973	-0.410567	0.166651
	416	-0.283647	0.231637	-0.342141	0.178578
	418	-0.439249	0.209929	-0.125015	0.340634
	420	-0.199927	0.252202	-0.318138	0.319461
	422	-0.186691	0.275747	-0.223729	0.288254
	424	-0.219382	0.24922	-0.10631	0.286484
	426	-0.246402	0.253979	-0.329428	0.180276
	428	-0.0859173	0.215314	-0.379423	0.216933
	430	-0.059449	0.26095	-0.36657	0.214837
	432	-0.258567	0.312235	-0.483374	0.279732
	434	-0.149157	0.333038	-0.404091	0.258432
	436	-0.168921	0.235066	-0.351905	0.271331
	438	-0.19842	0.2613	-0.324822	0.226417
	440	-0.259947	0.257077	-0.330256	0.225773
	442	-0.339536	0.232296	-0.18161	0.22644
	444	-0.265087	0.203019	-0.261306	0.208626
	446	-0.143976	0.216034	-0.295637	0.231865
	448	-0.167855	0.222739	-0.22119	0.22666
	450	-0.233195	0.258885	-0.370278	0.211542
	452	-0.021261	0.264479	-0.443463	0.223859
	454	-0.177621	0.215672	-0.265329	0.222837
	456	-0.243897	0.231894	-0.314774	0.256995
	458	-0.225502	0.211551	-0.658802	0.134939
	460	-0.132426	0.222216	-0.326722	0.193016
	462	-0.067632	0.26128	-0.301552	0.175691
	464	-0.133779	0.297395	-0.481665	0.0811994
	466	-0.0499815	0.31527	-0.234131	0.15164
	468	-0.0623791	0.260118	-0.206402	0.151449
	470	-0.123211	0.222665	-0.0126845	0.198737
	472	-0.280754	0.182662	-0.0756361	0.183367
	474	-0.195292	0.162677	-0.178086	0.146965
	476	-0.33054	0.158735	-0.168658	0.130603
	478	-0.367347	0.118035	-0.286294	0.201971
	480	-0.401955	0.183568	-0.503055	0.135641
	482	-0.286398	0.159834	-0.641101	0.198712
	484	-0.134518	0.0559258	-0.478359	0.139141
	486	-0.231251	0.135471	-0.48769	0.119692
	488	-0.204374	0.10418	-0.642658	0.200269
	490	-0.0145048	0.143292	-0.516936	0.245985
	492	-0.172207	0.0971501	-0.402335	0.221444
	494	-0.303892	0.135383	-0.416038	0.268803
	496	-0.276038	0.291778	-0.578863	0.253184
	498	-0.485685	0.234544	-0.637898	0.21215
	500	-0.357808	0.278784	-0.512245	0.159751
	502	-0.704135	0.264612	-0.343795	0.127672
	504	-0.649333	0.139319	-0.247066	0.216837
	506	-0.530695	0.107246	-0.121709	0.235342
	508	-0.372148	0.102223	-0.0139297	0.147502
	510	-0.475546	0.142744	0.0121851	0.152354
	512	-0.340477	0.199433	-0.152901	0.176047
	514	-0.231871	0.216932	-0.0974864	0.185929
	516	-0.293119	0.254547	-0.29353	0.211015
	518	-0.341435	0.248458	-0.116632	0.255254
	520	-0.41668	0.244131	-0.193877	0.101465
	522	-0.45377	0.271902	-0.349876	0.127008
	524	-0.367078	0.279731	-0.193413	0.141811
	526	-0.475141	0.288069	-0.356319	0.26177
	528	-0.566948	0.234929	-0.183859	0.275743
	530	-0.400923	0.189741	-0.193051	0.300405
	532	-0.234127	0.151497	-0.239212	0.240295
	534	-0.311015	0.129946	-0.49836	0.233087
	536	-0.419351	0.141045	-0.439385	0.217749
	538	-0.28307	0.148996	-0.522406	0.216125
	540	-0.30824	0.160323	-0.622923	0.213651
	542	-0.434945	0.152748	-0.436307	0.184398
	544	-0.150774	0.207275	-0.450345	0.154961
	546	-0.20196	0.281414	-0.234921	0.180912
	548	-0.0839273	0.307138	-0.0718358	0.192082
	550	0.15159	0.242576	-0.0719932	0.117608
	552	0.0685706	0.212375	-0.15814	0.112885
	554	0.00642821	0.157119	0.160454	0.123265
	556	-0.0913946	0.14248	0.0437744	0.125263
	558	-0.144332	0.0774099	-0.0711677	0.0836263
	560	-0.0381255	0.160742	-0.120588	0.103021
	562	0.010835	0.163401	-0.177989	0.121532
	564	-0.177772	0.221454	-0.218868	0.21498
	566	-0.307571	0.181332	-0.34301	0.0937117
	568	-0.466057	0.145981	-0.484711	0.117354
	570	-0.22269	0.176255	-0.648101	0.232286
	572	-0.160627	0.17173	-0.476115	0.140151
	574	-0.182218	0.16906	-0.440441	0.117205
	576	-0.1007	0.156942	-0.433465	0.129007
	578	-0.051941	0.117202	-0.381679	0.172223
	580	-0.232623	0.112542	-0.466315	0.134987
	582	-0.256007	0.103056	-0.507244	0.177067
	584	-0.175501	0.118323	-0.302227	0.190913
	586	-0.373891	0.129002	-0.385555	0.126048
	588	-0.110895	0.102675	-0.421976	0.1339
	590	-0.167495	0.166005	-0.212778	0.132471
	592	-0.0133346	0.145895	-0.195023	0.145344
	594	-0.124721	0.208569	-0.137876	0.216456
	596	-0.212207	0.180086	-0.100571	0.255812
	598	-0.398754	0.200442	0.0552879	0.24608
	600	-0.314293	0.271307	0.171286	0.204855
	602	-0.305113	0.250891	0.0480616	0.146848
	604	-0.229928	0.29555	0.196347	0.0754782
	606	-0.316984	0.366083	0.0839064	0.125724
	608	-0.14637	0.294063	0.0698891	0.155023
	610	-0.0159467	0.275415	0.0460281	0.166052
	612	0.166643	0.2135	-0.171713	0.214667
	614	0.0558338	0.161869	0.0270137	0.185037
	616	-0.0539975	0.142128	-0.218248	0.157219
	618	0.0868859	0.201297	-0.206536	0.210909
	620	-0.0562613	0.192316	-0.0258697	0.124672
	622	-0.0656704	0.188504	-0.108526	0.126532
	624	-0.194586	0.14368	0.0127619	0.148089
	626	-0.225671	0.103457	0.0250239	0.120835
	628	-0.23446	0.160035	0.0174914	0.0887501
	630	-0.253191	0.0614025	-0.0817739	0.114788
	632	-0.169224	0.111719	-0.179931	0.116445
	634	0.150928	0.149538	-0.208318	0.138851
	636	-0.0406757	0.113961	-0.152145	0.168587
	638	-0.035023	0.0907605	-0.266085	0.2285
	640	-0.0988118	0.0968864	-0.0689476	0.214856
	642	0.00378439	0.079328	-0.371579	0.258775
	644	-0.156098	0.105101	-0.293229	0.126381
	646	-0.0538666	0.0906624	-0.27503	0.109609
	648	-0.0885496	0.17087	0.0734234	0.117347
	650	-0.0254034	0.178042	0.0786582	0.125691
	652	0.00620319	0.168977	0.16575	0.208473
	654	-0.166197	0.192158	0.173232	0.225893
	656	-0.352485	0.0998059	0.160078	0.20522
	658	-0.277827	0.155185	-0.0249991	0.124714
	660	-0.386269	0.169232	0.0496869	0.163577
	662	-0.372051	0.132593	-0.0441815	0.210054
	664	-0.205246	0.21134	0.00737152	0.187248
	666	-0.198454	0.155833	0.0230869	0.134188
	668	-0.216725	0.149103	0.0204363	0.171682
	670	-0.118219	0.138815	0.0980994	0.136273
	672	-0.0734778	0.193092	0.0294494	0.149117
	674	-0.121539	0.271936	0.0931128	0.264458
	676	-0.0980135	0.28879	-0.117213	0.221584
	678	-0.0991233	0.252232	0.024218	0.167137
	680	0.03051	0.240368	-0.0346786	0.155214
	682	-0.151403	0.252968	0.0934062	0.114128
	684	-0.0854766	0.292768	0.0276241	0.122812
	686	-0.220724	0.271803	-0.0990268	0.107701
	688	-0.0118006	0.192	0.0561579	0.180379
	690	-0.0332617	0.163031	-0.117658	0.115807
	692	0.302742	0.122616	0.192595	0.147008
	694	0.175789	0.195966	0.04367	0.202483
	696	0.140746	0.200031	-0.115433	0.262425
	698	0.225288	0.217743	-0.232677	0.254773
	700	0.00830344	0.226317	0.0772122	0.284491
	702	0.178287	0.127285	0.0803941	0.285155
	704	0.0666752	0.135976	0.351552	0.169472
	706	0.26658	0.114899	0.322024	0.189388
	708	-0.0696305	0.180267	0.564779	0.185245
	710	0.15996	0.166347	0.455428	0.183787
	712	0.106368	0.1515	0.399708	0.181738
	714	0.253662	0.145565	0.330146	0.126274
	716	0.202415	0.143021	0.213127	0.14101
	718	0.0912624	0.170569	0.155171	0.146615
	720	0.0650769	0.15966	-0.00983069	0.241479
	722	-0.0965124	0.243509	0.128397	0.25433
	724	0.130348	0.159025	0.435732	0.252543
	726	0.187495	0.186101	0.464142	0.257087
	728	0.0550668	0.219063	0.157274	0.259868
	730	0.233829	0.234512	0.745324	0.163099
	732	0.320001	0.194753	0.548276	0.172129
	734	0.145445	0.156231	0.161824	0.189288
	736	0.352362	0.152375	0.189839	0.207194
	738	0.207592	0.129767	0.319857	0.148927
	740	0.267191	0.0933832	0.204049	0.135334
	742	0.292093	0.107583	0.200578	0.103189
	744	0.0399121	0.169393	0.243358	0.0937971
	746	-0.099625	0.184171	0.124309	0.210484
	748	0.0632528	0.295004	-0.185981	0.210203
	750	0.094684	0.264508	-0.0878514	0.190082
	752	0.0730503	0.155077	-0.249976	0.222871
	754	0.225061	0.130377	-0.130855	0.307392
	756	0.372461	0.130865	-0.0297077	0.195463
	758	0.258733	0.148978	-0.204359	0.2466
	760	0.182782	0.102217	-0.159347	0.247457
	762	0.0951538	0.13268	-0.20273	0.191602
	764	0.122309	0.129282	-0.215942	0.201239
	766	-0.0865422	0.128585	-0.150356	0.211275
	768	-0.0895659	0.144446	-0.276148	0.193538
	770	-0.0139826	0.143445	-0.0828755	0.163866
	772	0.116179	0.170464	-0.000113376	0.128137
	774	0.0413238	0.155822	0.0395487	0.141389
	776	0.105179	0.172963	0.154118	0.154217
	778	0.234936	0.194692	0.266738	0.219886
	780	0.169305	0.166851	-0.01238	0.213549
	782	0.266457	0.195901	0.0258052	0.148785
	784	0.446387	0.169178	0.0679017	0.14392
	786	0.451188	0.13929	0.186253	0.205216
	788	0.508038	0.227998	0.282117	0.206518
	790	0.579273	0.364018	0.399743	0.157057
	792	0.419615	0.29969	0.210801	0.219942
	794	0.455903	0.180049	0.152704	0.378357
	796	0.389001	0.129398	0.325859	0.118404
	798	0.250664	0.185535	0.141739	0.184511
	800	0.314235	0.220217	0.235574	0.296734
	802	0.3184	0.259732	0.3542	0.136188
	804	0.165741	0.284202	0.241751	0.175343
	806	0.195536	0.22441	0.100231	0.15621
	808	0.302579	0.187015	0.271941	0.173504
	810	0.233537	0.223183	0.0609539	0.185041
	812	0.210975	0.208204	0.164846	0.186857
	814	0.17191	0.17219	0.210451	0.175958
	816	0.139828	0.179519	0.0809648	0.173073
	818	0.313051	0.174761	-0.101752	0.205327
	820	0.27171	0.193257	-0.296791	0.193081
	822	0.436744	0.163165	-0.190855	0.161696
	824	0.425532	0.190807	0.0401011	0.125334
	826	0.488668	0.123867	0.563853	0.186214
	828	0.313485	0.13648	0.777391	0.179349
	830	0.456771	0.128626	0.621929	0.090859
	832	0.277757	0.129636	0.584315	0.0999827
	834	0.255955	0.101835	0.210546	0.20058
	836	0.141785	0.102904	0.22016	0.181064
	838	0.202619	0.114869	0.450003	0.157722
	840	0.104948	0.194457	0.501963	0.180778
	842	0.00593873	0.24711	0.343982	0.218028
	844	-0.0145372	0.231587	0.371248	0.20768
	846	0.0374213	0.226319	0.442499	0.228921
	848	0.122253	0.261631	0.519507	0.17133
	850	0.292335	0.233599	0.54848	0.226371
	852	0.368503	0.266387	0.468714	0.179196
	854	0.304636	0.262128	0.522201	0.10989
	856	0.323954	0.208185	0.512821	0.176914
	858	0.257518	0.217264	0.466231	0.154284
	860	0.223878	0.189777	0.629233	0.192433
	862	0.237129	0.216922	0.490569	0.18791
	864	-0.0523162	0.243145	0.532764	0.197416
	866	-0.000239561	0.199342	0.513075	0.169228
	868	0.00177398	0.211086	0.503915	0.142226
	870	0.104813	0.266032	0.33069	0.164967
	872	0.223842	0.283751	0.34726	0.152045
	874	0.531672	0.143649	0.309407	0.146452
	876	0.498323	0.206037	0.299864	0.0721437
	878	0.585514	0.245993	0.574464	0.134148
	880	0.625929	0.266103	0.292052	0.14891
	882	0.224254	0.219359	0.294257	0.121228
	884	0.182653	0.237408	0.16338	0.18414
	886	0.293787	0.26422	0.313706	0.203223
	888	0.0640739	0.166149	0.322895	0.132643
	890	0.151947	0.185098	0.27907	0.183141
	892	0.280863	0.1682	0.224903	0.0760069
	894	0.358986	0.275522	0.272146	0.148197
	896	0.329811	0.175391	0.350863	0.167699
	898	0.230197	0.198739	0.189331	0.203502
	900	0.175085	0.220267	0.23454	0.20666
	902	0.201398	0.209207	0.281155	0.168026
	904	0.0748331	0.214278	0.168153	0.118274
	906	0.166443	0.210337	0.163727	0.1342
	908	0.234255	0.136558	0.401887	0.0702387
	910	0.428353	0.107419	0.324681	0.0849127
	912	0.497653	0.0721094	0.284355	0.0960285
	914	0.198161	0.153366	0.372884	0.201102
	916	0.229848	0.19326	0.495034	0.176113
	918	0.251334	0.171736	0.375043	0.139721
	920	0.174822	0.158671	0.23112	0.177182
	922	0.0155194	0.210579	0.204228	0.216011
	924	0.232638	0.166338	0.332719	0.156382
	926	0.354867	0.14923	0.450205	0.21919
	928	0.203805	0.144662	0.403308	0.31137
	930	0.0398809	0.176523	0.737099	0.282115
	932	0.268507	0.159183	0.714683	0.207146
	934	0.0706858	0.153813	0.540335	0.130722
	936	0.225701	0.200887	0.473231	0.145659
	938	0.21409	0.181805	0.261922	0.155963
	940	0.370849	0.192501	-0.00500116	0.24493
	942	0.368429	0.186541	-0.106034	0.215718
	944	0.421564	0.180596	-0.233002	0.179132
	946	0.277901	0.0821096	0.137919	0.191306
	948	0.292035	0.201101	0.114182	0.17509
	950	0.435034	0.222796	0.176811	0.161558
	952	0.385801	0.19104	0.315961	0.172513
	954	0.290656	0.189415	0.482802	0.119668
	956	0.0932384	0.225895	0.180194	0.144577
	958	-0.518463	0.208564	-0.60321	0.252775

## Sheet: Fig.1h
	Time traces						Post-training PKCδ activity
		Control (unpaired)		1x			Control (unpaired)	1x
	Time (s)	Mean	SEM	Mean	SEM		1.00627	0.999305
	0	-3.39519	0.490142	-3.76765	0.22337		1.01042	1.00358
	2	-2.74909	0.513097	-2.89245	0.334823		1.00742	1.00921
	4	-2.32428	0.420593	-2.3933	0.31064		1.00382	1.00379
	6	-2.19143	0.332857	-2.41817	0.284514		0.983092	0.994081
	8	-2.52917	0.456751	-2.71573	0.227526		0.995837	1.00079
	10	-2.67977	0.448455	-2.53328	0.175698		0.992274	0.996174
	12	-2.55634	0.372663	-2.56946	0.183681		1.00086	0.992953
	14	-2.69377	0.365277	-2.56501	0.233888
	16	-2.72823	0.348076	-2.51993	0.264546
	18	-2.6477	0.335411	-2.55486	0.254781
	20	-2.54856	0.457884	-2.46251	0.293622
	22	-2.37623	0.469626	-2.32218	0.316731
	24	-2.43897	0.438656	-2.32611	0.32568
	26	-2.41354	0.381682	-2.37229	0.362792
	28	-2.33243	0.496251	-2.39475	0.368725
	30	-2.36345	0.378985	-2.59306	0.311879
	32	-2.49255	0.410348	-2.75948	0.343846
	34	-2.57705	0.306277	-2.58714	0.312824
	36	-2.49275	0.288186	-2.84945	0.353741
	38	-2.37381	0.328509	-2.78613	0.308751
	40	-2.2729	0.363603	-2.77517	0.327784
	42	-2.32674	0.45852	-2.82539	0.267656
	44	-2.48298	0.445951	-2.72818	0.213453
	46	-2.35798	0.429692	-2.34606	0.124825
	48	-2.67124	0.353767	-2.41338	0.121071
	50	-2.30276	0.426004	-2.39419	0.140964
	52	-2.25887	0.483955	-2.16774	0.15629
	54	-2.35875	0.400318	-2.22521	0.128521
	56	-2.54149	0.313751	-2.39818	0.259846
	58	-2.37206	0.371114	-2.45147	0.300185
	60	-2.60064	0.331929	-2.48978	0.18898
	62	-2.66703	0.324633	-2.62571	0.249583
	64	-2.63344	0.400617	-2.50422	0.229907
	66	-2.73526	0.38715	-2.55071	0.252407
	68	-2.5836	0.369279	-2.6565	0.258764
	70	-2.39183	0.363529	-2.44576	0.392146
	72	-2.36817	0.413364	-2.44692	0.354616
	74	-2.43312	0.351718	-2.44224	0.441944
	76	-2.26471	0.266215	-2.04314	0.298307
	78	-2.11187	0.320271	-2.05879	0.334593
	80	-2.09741	0.320995	-2.31418	0.350243
	82	-2.14993	0.296814	-2.33467	0.327953
	84	-2.27269	0.285168	-2.29948	0.223217
	86	-2.26648	0.323929	-2.5262	0.30825
	88	-2.35764	0.270727	-2.5398	0.221893
	90	-2.48514	0.277292	-2.49189	0.18868
	92	-2.52094	0.348771	-2.493	0.294158
	94	-2.49214	0.312649	-2.38807	0.328797
	96	-2.64931	0.347117	-2.37139	0.204769
	98	-2.8315	0.374632	-2.36469	0.309224
	100	-2.64549	0.335658	-2.2741	0.142388
	102	-2.53045	0.379953	-2.3637	0.154206
	104	-2.52551	0.359495	-2.35542	0.218161
	106	-2.73206	0.333853	-2.44906	0.221554
	108	-2.53196	0.229891	-2.33884	0.232707
	110	-2.66391	0.308348	-2.49988	0.269985
	112	-2.65745	0.350808	-2.64163	0.249352
	114	-2.55529	0.319005	-2.64163	0.262508
	116	-2.55049	0.196231	-2.89641	0.235566
	118	-2.8685	0.312922	-3.13244	0.285491
	120	-2.95599	0.338953	-3.38108	0.35924
	122	-3.14526	0.280061	-3.19843	0.351578
	124	-3.33053	0.312348	-3.41532	0.347001
	126	-3.01692	0.270583	-3.14655	0.371421
	128	-2.58234	0.353242	-3.11396	0.298647
	130	-2.47601	0.337077	-3.05771	0.25437
	132	-2.32927	0.31324	-3.06616	0.265931
	134	-2.42165	0.297183	-2.71304	0.215633
	136	-2.44049	0.324658	-2.66188	0.238486
	138	-2.59456	0.457496	-2.77119	0.196397
	140	-2.33286	0.419883	-2.90926	0.258635
	142	-2.34617	0.418348	-2.90712	0.243338
	144	-2.35203	0.438542	-2.71525	0.238033
	146	-2.3072	0.465704	-2.72176	0.244751
	148	-2.24284	0.428989	-2.77695	0.25451
	150	-2.38768	0.401054	-2.62095	0.234203
	152	-2.06318	0.306825	-2.59884	0.182411
	154	-1.85972	0.334875	-2.44254	0.198126
	156	-1.72655	0.317871	-2.31181	0.19812
	158	-1.66461	0.414072	-2.39221	0.186601
	160	-1.60105	0.358821	-2.33545	0.192597
	162	-1.73793	0.411434	-2.13478	0.204569
	164	-1.72415	0.510225	-2.17024	0.246161
	166	-1.70776	0.50823	-1.87953	0.224373
	168	-1.75349	0.527872	-1.81737	0.217295
	170	-1.51476	0.490373	-1.80282	0.188032
	172	-1.41087	0.471769	-1.6522	0.245754
	174	-1.25491	0.420726	-1.88923	0.216047
	176	-1.12569	0.393648	-1.77937	0.209216
	178	-1.03105	0.31057	-1.70593	0.250278
	180	-1.15831	0.350237	-1.65528	0.233575
	182	-1.1675	0.322382	-1.84778	0.306334
	184	-1.21413	0.322547	-1.4689	0.198376
	186	-1.27791	0.369703	-1.59169	0.135104
	188	-1.10215	0.455383	-1.58089	0.201032
	190	-0.971309	0.417809	-1.42831	0.19831
	192	-0.823361	0.416176	-1.42552	0.228377
	194	-0.846937	0.396947	-1.18229	0.183033
	196	-0.808324	0.362349	-1.22364	0.193502
	198	-0.720204	0.383316	-1.29447	0.240871
	200	-0.701109	0.38996	-1.30511	0.25205
	202	-0.518677	0.303917	-1.18934	0.265134
	204	-0.767888	0.337256	-0.967456	0.233678
	206	-0.379945	0.35105	-1.06943	0.241201
	208	-0.555774	0.313181	-0.801448	0.238645
	210	-0.559642	0.260227	-0.761169	0.225781
	212	-0.631058	0.280678	-0.745877	0.247506
	214	-0.461548	0.3064	-0.708384	0.358408
	216	-0.286936	0.34414	-0.593241	0.288658
	218	-0.239335	0.289311	-0.581219	0.288282
	220	-0.168646	0.310904	-0.789201	0.231185
	222	0.157315	0.22335	-0.774201	0.185268
	224	-0.164927	0.297765	-0.670327	0.175293
	226	-0.293927	0.316091	-0.536138	0.148037
	228	-0.0947611	0.226578	-0.713453	0.142064
	230	-0.236148	0.234089	-0.831931	0.131229
	232	-0.228554	0.235221	-0.758859	0.143697
	234	-0.030119	0.225749	-0.791274	0.21015
	236	0.0448326	0.272296	-0.732722	0.255686
	238	-0.114986	0.296059	-0.729764	0.300232
	240	0.0345706	0.265985	-0.740088	0.297253
	242	0.117823	0.230984	-0.569037	0.308617
	244	0.138839	0.237149	-0.532302	0.267553
	246	0.0151556	0.20246	-0.67871	0.280107
	248	0.0716847	0.196588	-0.45047	0.305138
	250	0.0869309	0.163651	-0.249668	0.301429
	252	-0.404461	0.154611	-0.113987	0.307747
	254	-0.154998	0.245624	-0.322515	0.252068
	256	-0.145343	0.184445	-0.324792	0.226713
	258	-0.0754642	0.262256	-0.393302	0.243982
	260	-0.245404	0.255844	-0.308352	0.174272
	262	0.0545165	0.216861	-0.575397	0.245963
	264	-0.285072	0.211527	-0.49204	0.251601
	266	-0.346479	0.170759	-0.33592	0.204854
	268	-0.392808	0.151644	-0.394724	0.21149
	270	-0.128839	0.187981	-0.453679	0.264615
	272	-0.0897787	0.232477	-0.0222392	0.276976
	274	0.15243	0.207029	-0.136392	0.2275
	276	0.201023	0.224101	-0.38271	0.278485
	278	0.0712622	0.242467	-0.256857	0.236702
	280	0.0280552	0.224853	-0.168614	0.241625
	282	0.210676	0.240132	-0.268311	0.179838
	284	0.26936	0.225477	-0.21221	0.194188
	286	0.20236	0.203122	-0.350268	0.191039
	288	0.109682	0.167135	-0.530388	0.0983957
	290	0.0801289	0.157156	-0.371354	0.148571
	292	-0.0600067	0.283468	-0.409412	0.264228
	294	0.101925	0.251995	-0.41947	0.269793
	296	-0.0493583	0.222757	-0.391013	0.26709
	298	0.0923318	0.250424	-0.259474	0.189728
	300	-0.0930907	0.201567	-0.455238	0.148899
	302	-0.107869	0.164879	-0.409056	0.175114
	304	-0.0761389	0.28211	-0.190042	0.209109
	306	0.0681675	0.335529	-0.289956	0.172471
	308	0.050923	0.315341	-0.351091	0.23699
	310	0.0453203	0.287003	-0.360309	0.155966
	312	0.150895	0.297625	-0.289231	0.232609
	314	-0.120447	0.226758	-0.105643	0.140745
	316	-0.127075	0.269858	-0.178531	0.235583
	318	-0.290567	0.18678	-0.215854	0.263548
	320	-0.0645639	0.253948	-0.120554	0.189906
	322	-0.0413438	0.221675	-0.233808	0.196745
	324	-0.0409125	0.146793	-0.0766706	0.238601
	326	-0.292499	0.166332	-0.0781452	0.190225
	328	-0.0630481	0.196249	-0.1038	0.152921
	330	-0.0074033	0.25974	-0.108941	0.19757
	332	0.180978	0.253962	-0.052699	0.194204
	334	0.171778	0.27047	-0.16528	0.194521
	336	0.350577	0.238563	-0.183304	0.234002
	338	0.347712	0.246679	-0.36927	0.262537
	340	0.287335	0.236643	-0.311985	0.285224
	342	0.231972	0.228551	-0.330734	0.329515
	344	0.215964	0.295818	-0.305361	0.315598
	346	0.158253	0.282132	-0.257146	0.220452
	348	0.330776	0.279774	-0.415668	0.124576
	350	0.399633	0.259563	-0.438587	0.0673849
	352	0.360525	0.284103	-0.434486	0.183251
	354	0.299405	0.20544	-0.464014	0.168634
	356	0.188796	0.254586	-0.269205	0.122896
	358	0.261509	0.246276	-0.346161	0.134892
	360	0.292554	0.300153	-0.169878	0.182196
	362	0.035967	0.268012	-0.274863	0.227893
	364	0.0537212	0.309855	-0.296057	0.197214
	366	0.138425	0.320846	-0.346138	0.185852
	368	0.0558479	0.25418	-0.272105	0.188177
	370	-0.127414	0.215334	-0.291717	0.130857
	372	0.0638241	0.208666	-0.424268	0.0784736
	374	-0.130791	0.346651	-0.187724	0.0912111
	376	-0.147898	0.335336	-0.341838	0.232211
	378	-0.0606097	0.311975	-0.372934	0.16285
	380	0.0839753	0.297501	-0.186307	0.239418
	382	-0.000760787	0.324682	-0.084574	0.318719
	384	-0.0938479	0.256821	-0.14187	0.23698
	386	-0.0686835	0.261643	-0.108199	0.286376
	388	-0.0666656	0.293166	-0.081866	0.236255
	390	-0.148891	0.267888	-0.224693	0.24866
	392	-0.123419	0.212262	-0.0412729	0.261956
	394	-0.0294033	0.261236	-0.411575	0.201054
	396	-0.0569011	0.219918	-0.371227	0.14395
	398	0.0422002	0.30049	-0.31681	0.233724
	400	0.0943247	0.26528	-0.0219308	0.148398
	402	0.093827	0.29584	-0.0807967	0.176353
	404	0.0907834	0.334106	-0.0778445	0.110842
	406	0.0555092	0.275315	-0.20106	0.125587
	408	-0.089365	0.189593	-0.0254374	0.162715
	410	-0.0125181	0.237525	0.0500109	0.146918
	412	-0.0578698	0.233342	-0.0954942	0.152453
	414	-0.0279088	0.240293	-0.166261	0.228699
	416	-0.0582461	0.204752	-0.239004	0.254726
	418	-0.044702	0.210905	-0.407258	0.242537
	420	-0.116649	0.20598	-0.606181	0.265742
	422	-0.173413	0.248568	-0.539891	0.344949
	424	-0.39025	0.161271	-0.368123	0.203887
	426	-0.422899	0.148788	-0.375957	0.203927
	428	-0.112174	0.281393	-0.732568	0.295954
	430	-0.14273	0.139532	-0.413107	0.234312
	432	-0.00331157	0.177828	-0.20793	0.241995
	434	-0.0480726	0.196677	-0.20146	0.245323
	436	-0.00652888	0.208943	-0.246508	0.1797
	438	0.0259576	0.227087	-0.267904	0.13479
	440	-0.225995	0.253782	-0.0572665	0.148667
	442	-0.154432	0.212517	-0.0864431	0.18102
	444	0.0545816	0.17814	-0.341345	0.157681
	446	0.121134	0.176021	-0.317777	0.18063
	448	-0.127618	0.198754	-0.0800747	0.108596
	450	-0.00935652	0.177774	-0.196692	0.148782
	452	0.0737107	0.191888	-0.263328	0.163605
	454	0.102599	0.189658	-0.292324	0.150236
	456	-0.0394552	0.189048	-0.289875	0.120324
	458	0.0499054	0.190658	-0.21797	0.160691
	460	0.104397	0.2274	-0.350098	0.222327
	462	0.0662285	0.199138	-0.403066	0.135076
	464	-0.00736235	0.160898	-0.764258	0.2165
	466	-0.0791464	0.247319	-0.707474	0.228116
	468	0.0581596	0.276051	-0.558693	0.152135
	470	-0.0560802	0.17267	-0.310825	0.221212
	472	-0.00772716	0.169097	-0.17048	0.206469
	474	0.0855841	0.201833	-0.265445	0.200492
	476	0.0671083	0.123343	-0.391654	0.186258
	478	-0.0422914	0.164026	-0.283659	0.206224
	480	-0.0411918	0.127207	-0.283391	0.0978739
	482	0.0248077	0.0999594	-0.159599	0.143525
	484	-0.0197222	0.152919	-0.229217	0.113755
	486	0.168541	0.188691	-0.137404	0.140585
	488	0.127445	0.187144	-0.22746	0.124582
	490	0.0812824	0.226845	-0.235708	0.136786
	492	-0.0503484	0.200521	-0.279316	0.165083
	494	-0.111078	0.178382	-0.397208	0.215083
	496	-0.29992	0.135668	-0.199072	0.293461
	498	-0.232958	0.144048	-0.452387	0.203196
	500	-0.210407	0.131607	-0.291066	0.246243
	502	-0.180891	0.103191	-0.307637	0.23282
	504	-0.106068	0.105092	-0.0212289	0.227355
	506	0.159975	0.153402	0.16211	0.196066
	508	0.15148	0.0784238	0.225425	0.238846
	510	-0.01362	0.0816356	-0.214228	0.20585
	512	-0.250935	0.108477	-0.266503	0.197421
	514	-0.137693	0.0870484	-0.431919	0.281303
	516	-0.114008	0.169343	-0.520033	0.284919
	518	-0.300152	0.202188	-0.238605	0.21197
	520	-0.156509	0.185561	-0.24723	0.177825
	522	-0.155161	0.278168	-0.166378	0.146787
	524	-0.193854	0.27931	-0.0803703	0.176835
	526	-0.177971	0.262796	0.0274191	0.227543
	528	-0.0407388	0.219409	-0.160304	0.182669
	530	-0.0186186	0.201464	-0.201495	0.144905
	532	0.18564	0.210872	-0.204735	0.145978
	534	0.163036	0.195703	-0.378807	0.216446
	536	-0.0390317	0.202598	-0.437194	0.193096
	538	0.0314559	0.259734	-0.389703	0.212328
	540	0.201663	0.205142	-0.237103	0.1631
	542	0.000817143	0.232922	-0.402098	0.12384
	544	0.0106852	0.283523	0.0741481	0.135199
	546	-0.0932779	0.160092	0.135546	0.142172
	548	0.00159993	0.258915	0.178126	0.0627969
	550	-0.198769	0.240875	0.182055	0.103398
	552	-0.320234	0.190283	0.28995	0.214498
	554	-0.156098	0.288807	0.210568	0.192765
	556	-0.200906	0.199067	-0.0104216	0.234988
	558	0.00847529	0.182476	-0.0771123	0.291674
	560	-0.0424542	0.168037	-0.00906882	0.226879
	562	0.0642075	0.155472	-0.0797233	0.187092
	564	0.0434499	0.154686	-0.314422	0.19456
	566	0.0137106	0.178484	-0.0302123	0.184186
	568	-0.241703	0.168248	0.0202697	0.155054
	570	-0.00259418	0.168591	-0.123222	0.167091
	572	-0.0390485	0.14511	-0.227687	0.257255
	574	-0.0630808	0.122449	-0.243261	0.194262
	576	-0.0307227	0.112873	-0.219812	0.202805
	578	0.196557	0.134456	-0.0458354	0.194152
	580	-0.170912	0.154505	-0.144513	0.145597
	582	-0.0603732	0.177675	-0.140453	0.147933
	584	0.109816	0.152486	-0.0434778	0.168933
	586	0.312087	0.216366	-0.135549	0.220055
	588	0.255361	0.238	-0.151099	0.184114
	590	0.359255	0.231565	-0.158647	0.175428
	592	0.23214	0.184603	-0.270554	0.16252
	594	0.27226	0.13818	-0.300556	0.146134
	596	-0.00444186	0.209984	-0.324668	0.148076
	598	-0.0208926	0.165953	-0.482166	0.155573
	600	-0.180021	0.162342	-0.307814	0.124396
	602	-0.156091	0.163409	-0.0634432	0.12906
	604	-0.264348	0.192548	-0.056903	0.153295
	606	-0.110257	0.144833	-0.0142879	0.194842
	608	-0.111555	0.188807	0.0855518	0.115012
	610	0.130298	0.136109	-0.0998855	0.104064
	612	0.0598542	0.16394	0.0052524	0.194754
	614	0.324911	0.183451	-0.00213127	0.128699
	616	0.0865243	0.184215	-0.101057	0.160096
	618	-0.00131937	0.201841	-0.0267564	0.164907
	620	0.0827888	0.145192	0.249631	0.189088
	622	0.0678611	0.220915	0.0679698	0.279385
	624	-0.299046	0.201612	0.0209477	0.157033
	626	-0.508024	0.26633	-0.117886	0.139161
	628	-0.345847	0.172651	-0.253	0.15962
	630	0.121007	0.128463	-0.259289	0.177726
	632	0.0506091	0.133337	-0.294904	0.157565
	634	0.196568	0.149237	-0.381466	0.170767
	636	0.268598	0.115226	-0.26471	0.155828
	638	0.411358	0.115747	-0.0806259	0.157831
	640	0.324745	0.161826	-0.219173	0.119827
	642	0.0305644	0.10366	-0.273015	0.159108
	644	-0.0148556	0.128298	-0.178799	0.157262
	646	0.0201308	0.128831	-0.0420568	0.120363
	648	0.135044	0.176098	-0.00994364	0.111905
	650	0.230046	0.198056	0.373021	0.174404
	652	0.340079	0.216455	0.350618	0.187799
	654	0.248157	0.216231	0.43333	0.172978
	656	0.313853	0.148705	0.560803	0.16384
	658	0.201037	0.189278	0.346087	0.134994
	660	-0.0560128	0.128028	0.248583	0.102718
	662	-0.119149	0.177171	0.163767	0.0869661
	664	-0.137319	0.237177	0.0557077	0.103811
	666	-0.181973	0.190783	-0.00720143	0.103595
	668	-0.0723312	0.209793	-0.0110578	0.179937
	670	-0.0453686	0.245381	-0.362448	0.178237
	672	-0.106167	0.200987	-0.183629	0.160961
	674	-0.237755	0.182282	-0.281076	0.13501
	676	-0.240554	0.256067	-0.42935	0.107518
	678	-0.106747	0.211704	-0.494355	0.189447
	680	-0.0232591	0.215329	-0.312997	0.11069
	682	0.113103	0.218773	-0.218054	0.13404
	684	0.174172	0.157833	-0.140174	0.217585
	686	0.425705	0.29846	0.0250571	0.278165
	688	0.322479	0.233018	-0.0393704	0.216776
	690	0.258899	0.236566	0.0143713	0.241991
	692	0.202008	0.21446	0.0743208	0.161464
	694	0.164687	0.233821	-0.0277687	0.187922
	696	-0.0645686	0.214066	0.0154629	0.138561
	698	-0.0224583	0.139248	0.359402	0.180378
	700	-0.0293005	0.151043	0.393813	0.190216
	702	-0.0858972	0.154485	0.411574	0.146172
	704	0.106508	0.244672	0.41379	0.183002
	706	0.349283	0.169241	0.473469	0.175565
	708	0.31046	0.192922	0.453272	0.181595
	710	0.455293	0.225529	0.344328	0.2252
	712	0.250332	0.170108	0.355551	0.195985
	714	-0.0193471	0.157912	0.228053	0.130187
	716	-0.285134	0.0934578	0.153891	0.313696
	718	-0.183073	0.189045	0.112508	0.232374
	720	-0.278931	0.210044	0.098017	0.227857
	722	-0.0528646	0.205398	0.0671665	0.226449
	724	0.0599282	0.269485	0.329014	0.145695
	726	0.0631849	0.292576	0.33455	0.15952
	728	0.231157	0.29446	0.324954	0.280977
	730	0.322293	0.318465	0.22782	0.22488
	732	0.318609	0.279119	0.33665	0.198009
	734	0.0915538	0.262112	0.53044	0.254843
	736	-0.0192594	0.168908	0.32039	0.22201
	738	-0.239212	0.0665653	0.125191	0.152689
	740	-0.432902	0.161276	0.244468	0.141346
	742	-0.387406	0.199761	0.044827	0.0785786
	744	-0.0500842	0.184613	0.0817418	0.104807
	746	0.0991596	0.194364	0.0376914	0.208135
	748	0.144044	0.1596	0.188668	0.222002
	750	0.381656	0.18723	0.129348	0.227082
	752	0.273689	0.15944	0.138263	0.212149
	754	0.040404	0.235517	0.0613187	0.138097
	756	0.220717	0.171942	-0.258456	0.178022
	758	0.019854	0.125518	-0.0709127	0.172693
	760	0.12819	0.124996	0.101345	0.113765
	762	0.0587145	0.163596	0.216517	0.142563
	764	0.00873337	0.194601	0.082613	0.163541
	766	-0.0721575	0.201653	0.203616	0.166621
	768	-0.285888	0.250269	0.163525	0.22588
	770	-0.393046	0.301796	-0.175282	0.261021
	772	-0.630056	0.384566	-0.110527	0.332455
	774	-0.549576	0.406728	0.0880131	0.274399
	776	-0.361625	0.343423	-0.0821466	0.182143
	778	-0.308817	0.29844	-0.0453297	0.190136
	780	-0.30882	0.321598	-0.0303297	0.238413
	782	-0.195127	0.25881	0.207246	0.24293
	784	0.265041	0.158281	0.226873	0.29356
	786	0.413545	0.141688	0.376233	0.247804
	788	0.211605	0.140477	0.424713	0.146459
	790	0.293016	0.119139	0.304257	0.156339
	792	0.216807	0.0988346	0.213599	0.140436
	794	0.119658	0.0679308	0.29018	0.0884829
	796	0.0384304	0.166243	0.0799365	0.0706693
	798	0.240448	0.251037	0.0053138	0.0911413
	800	0.227419	0.252462	-0.0683372	0.104644
	802	0.149259	0.154069	-0.159275	0.196802
	804	0.128182	0.225261	0.0881998	0.206727
	806	0.262919	0.157564	0.0184552	0.17984
	808	0.005035	0.156324	0.236553	0.201978
	810	0.244322	0.151046	0.649038	0.223735
	812	0.114815	0.141324	0.492262	0.229223
	814	0.144761	0.146068	0.388545	0.221053
	816	-0.0280143	0.262366	0.36222	0.226568
	818	-0.064484	0.222707	0.374046	0.240287
	820	-0.239574	0.244545	0.196911	0.164276
	822	-0.2592	0.252198	0.391965	0.217458
	824	-0.402948	0.273448	0.216112	0.1955
	826	-0.239255	0.228355	0.205095	0.0648529
	828	-0.281215	0.260795	0.26755	0.0716587
	830	-0.543185	0.232587	0.339699	0.149505
	832	-0.559304	0.24017	0.224426	0.233548
	834	-0.286608	0.155881	0.421438	0.173106
	836	-0.211454	0.242579	0.473115	0.174387
	838	-0.382005	0.249483	0.419326	0.21225
	840	-0.0293565	0.231713	0.262289	0.239441
	842	-0.14388	0.13438	0.0943244	0.243961
	844	-0.215508	0.204078	0.0123604	0.255283
	846	0.0935788	0.210888	-0.0407864	0.223186
	848	0.466986	0.170462	0.0290773	0.199769
	850	0.318392	0.219061	0.142891	0.216424
	852	0.270738	0.254899	0.142995	0.190614
	854	0.201819	0.31155	0.232346	0.0861099
	856	0.0139855	0.334102	0.148045	0.137532
	858	-0.0579524	0.291016	0.18762	0.229673
	860	0.0624334	0.303513	-0.0425837	0.178684
	862	-0.0872748	0.270513	-0.0555124	0.222823
	864	0.0451737	0.222394	0.0587983	0.164504
	866	0.00826037	0.161212	-0.0134862	0.160689
	868	0.346927	0.171551	0.12218	0.278735
	870	0.209967	0.228253	-0.000126128	0.246571
	872	0.377168	0.310903	0.107689	0.178567
	874	0.110183	0.226994	-0.119002	0.221494
	876	0.121628	0.257434	-0.0109497	0.168246
	878	-0.0122242	0.242253	-0.0443265	0.154747
	880	0.0170051	0.290848	0.0835581	0.217724
	882	0.155739	0.325046	0.13465	0.234593
	884	0.102644	0.316187	0.1086	0.184293
	886	-0.166223	0.230845	0.173373	0.247267
	888	-0.180133	0.31192	0.136109	0.237929
	890	-0.0132834	0.31182	0.0670749	0.15014
	892	-0.261621	0.290869	-0.195595	0.302342
	894	-0.263525	0.209582	-0.187404	0.213885
	896	0.200544	0.146707	0.0504397	0.194601
	898	0.0259448	0.152942	0.0537536	0.155271
	900	0.0592559	0.153517	0.132576	0.131952
	902	-0.00793199	0.121881	0.385065	0.222208
	904	0.0264487	0.141035	0.608679	0.174236
	906	0.0138811	0.14897	0.562184	0.13998
	908	-0.107384	0.207294	0.375314	0.196836
	910	-0.0672136	0.317422	0.600785	0.205729
	912	-0.100188	0.345774	0.423248	0.133495
	914	0.17731	0.192141	0.196176	0.145237
	916	0.00632978	0.247956	0.289845	0.208595
	918	0.114405	0.144477	0.100592	0.330816
	920	0.186902	0.206916	0.0248817	0.335098
	922	0.0574405	0.232943	0.182212	0.248068
	924	0.255755	0.274465	0.175493	0.281498
	926	0.101162	0.223249	0.0812847	0.295887
	928	-0.0907518	0.255848	0.250154	0.177122
	930	0.00984722	0.256881	0.231098	0.26811
	932	0.0630467	0.188862	0.0408507	0.371191
	934	-0.0979625	0.141993	0.287074	0.373458
	936	-0.257012	0.330124	0.051166	0.325875
	938	0.21573	0.304249	0.160166	0.432536
	940	0.0171811	0.398155	-0.144822	0.431399
	942	0.134326	0.254464	0.105014	0.270982
	944	0.13237	0.376373	0.135741	0.272517
	946	0.388161	0.23228	0.233282	0.253089
	948	0.0967926	0.251466	0.110648	0.211819
	950	0.152636	0.236023	0.331821	0.199976
	952	0.113187	0.240884	0.488937	0.18734
	954	0.0748409	0.223965	0.824092	0.215321
	956	-0.406365	0.304813	0.4249	0.265438
	958	-1.05117	0.399517	-0.277833	0.339497
