# Supplementary material for: PKCδ is an activator of neuronal mitochondrial metabolism that mediates the spacing effect on memory consolidation
Source: eLife. 2024 Oct 30;13:RP92085. doi: 10.7554/eLife.92085 (PMC11524582; doi:10.7554/eLife.92085)
Supplement: Figure 3—figure supplement 1—source data 1. [file elife-92085-fig3-figsupp1-data1.xlsx]

## Sheet: Fig.S3a
	elav-GAL4/+	elav-GAL4/UAS-PDK RNAi KK106641
	0.954842	0.368567
	0.860551	0.498846
	1.217	0.381565
		0.455861
		0.287839

## Sheet: Fig.S3b
	No graph displayed on Fig. S3b

## Sheet: Fig.S3c
	Time traces										Slope					Pyronic ratio before Sodium Azide injection
		No RNAi				PKCδ RNAi JF02991					No RNAi		PKCδ RNAi JF02991			No RNAi		PKCδ RNAi JF02991
		Control (DMSO)		PDBu		Control (DMSO)		PDBu			Control (DMSO)	PDBu	Control (DMSO)	PDBu		Control (DMSO)	PDBu	Control (DMSO)	PDBu
	Time (s)	Mean	SEM	Mean	SEM	Mean	SEM	Mean	SEM		0.15416	0.81437	0.75821	0.67349		1.79841	6.40638	0.276152	0.26739
	0	-0.321781	0.469958	-0.599634	0.425542	1.62381	0.869923	1.0635	0.508259		1.39765	1.30424	0.65729	1.01597		1.05447	4.634	-3.51181	10.2383
	0.5	-0.266997	0.643247	-0.865483	0.566196	1.73447	0.939036	1.38744	0.651359		1.0541	0.67263	0.651955	0.88861		-0.355578	7.81806	-0.24968	10.7696
	1	-0.102686	0.764337	-0.941147	0.6171	1.73328	1.05042	1.78928	0.71833		0.793685	7.4847	1.59743	1.8722		1.64302	14.3445	6.90771	2.20733
	1.5	0.0155534	0.774527	-0.823355	0.598446	1.64429	1.01887	1.93188	0.676255		0.699295	1.77345	0.66716	1.15098		-0.9292	0.255762	-0.70451	-0.315387
	2	-0.0218385	0.749503	-0.853357	0.572668	1.40793	1.03124	1.99641	0.628718		0.67899	1.2498	1.5344	1.2598		-3.61398	7.2788	-3.55863	9.3096
	2.5	-0.0458498	0.704589	-0.94926	0.549075	1.1633	0.969295	1.9332	0.622314		0.449325	3.75715	0.57331	0.26341		4.22715	5.12946	-2.48942	0.692543
	3	-0.164255	0.689244	-1.08616	0.448834	0.851489	0.879225	1.50935	0.564681		0.21631	1.02	0.571895	0.422645		-0.333971	7.16117	-8.97174	5.41994
	3.5	-0.2779	0.626071	-1.02601	0.427127	0.711657	0.818095	1.65443	0.677256		0.865	0.73571	0.32782	1.07814		-2.29037	9.34917	-0.563773	4.65105
	4	-0.145039	0.605327	-0.726032	0.397223	0.80514	0.740173	1.5618	0.718134		0.629915	0.76318	1.06902			1.75111	6.21217	0.545486
	4.5	-0.0502775	0.577356	-0.727917	0.357683	0.938735	0.7211	1.66885	0.881399		1.02642	3.33309	0.66915			-1.54968	6.19686	2.09886
	5	0.00931283	0.612037	-0.507233	0.370141	1.13416	0.743904	1.44868	0.689772				0.7666					-1.56691
	5.5	0.243941	0.593858	-0.379191	0.412692	0.949965	0.706805	1.44658	0.706986				0.91528					-0.318921
	6	0.0385459	0.540937	-0.438549	0.385967	1.14962	0.693631	1.31955	0.636604				1.00748					-2.79505
	6.5	0.0312595	0.47062	-0.435928	0.443654	1.04943	0.712767	0.959335	0.584952
	7	0.0878381	0.550246	-0.64124	0.441516	1.04334	0.664255	0.860228	0.327968
	7.5	0.153904	0.518718	-0.910104	0.391991	0.978519	0.66888	0.663439	0.457205
	8	0.294578	0.494616	-0.781581	0.310377	0.8529	0.682093	1.14891	0.522431
	8.5	0.536324	0.494176	-0.754372	0.282219	0.287964	0.555821	0.891849	0.641634
	9	0.596566	0.562355	-0.80995	0.230118	0.431611	0.496807	0.787726	0.64774
	9.5	0.363841	0.49928	-0.779827	0.219481	0.43097	0.561895	0.936172	0.560747
	10	0.160333	0.452489	-0.680172	0.154277	0.455087	0.556448	0.791714	0.621958
	10.5	0.296972	0.486529	-0.535499	0.148979	0.716015	0.571828	0.585569	0.395191
	11	0.302162	0.43087	-0.310245	0.266214	0.731805	0.590041	0.80959	0.388115
	11.5	0.27577	0.390239	-0.253954	0.323231	0.805632	0.586673	0.740193	0.446157
	12	0.210453	0.387426	-0.106532	0.354086	0.875789	0.482096	0.919646	0.405278
	12.5	0.203866	0.400756	-0.0866638	0.429481	0.77569	0.455274	0.764271	0.37567
	13	0.0566077	0.335837	-0.0706152	0.424668	1.13266	0.505146	1.07157	0.27361
	13.5	-0.00880361	0.39993	-0.0927341	0.422542	1.02241	0.506613	0.774937	0.338933
	14	0.147321	0.393353	-0.176442	0.446062	0.793795	0.488748	0.735219	0.433152
	14.5	0.378148	0.328092	-0.0437281	0.438458	0.658938	0.481579	0.827391	0.394122
	15	0.320963	0.34073	-0.0758502	0.359295	0.420386	0.470145	1.00945	0.390175
	15.5	0.248481	0.356252	-0.491562	0.278888	0.327669	0.317109	1.18441	0.396587
	16	0.371894	0.343075	-0.39675	0.19237	0.633097	0.334463	1.42689	0.323016
	16.5	0.146094	0.304813	-0.205735	0.174563	0.475992	0.273244	1.10901	0.362403
	17	0.216037	0.291743	-0.204344	0.197473	0.787321	0.341251	1.15922	0.440161
	17.5	0.266991	0.292514	0.0439987	0.163153	1.06841	0.358135	1.08085	0.472973
	18	0.241102	0.292035	0.282819	0.244492	1.06298	0.341347	0.952503	0.414388
	18.5	0.199227	0.337638	0.214552	0.245811	0.755974	0.385897	0.858489	0.494747
	19	0.161323	0.295573	0.203672	0.248525	0.773884	0.441617	0.586227	0.52
	19.5	0.221147	0.296064	0.291989	0.267087	0.631865	0.436469	0.428584	0.513939
	20	0.215192	0.347575	0.42474	0.227677	0.582166	0.450124	0.45242	0.452572
	20.5	0.231808	0.402522	0.269203	0.130114	0.252775	0.384431	0.477349	0.43316
	21	0.171123	0.273481	0.0723878	0.128233	0.300264	0.303745	0.621908	0.412789
	21.5	0.251405	0.298393	-0.0978109	0.111272	0.373068	0.272491	0.669541	0.32667
	22	0.0224336	0.256295	-0.118505	0.177813	0.506152	0.31901	0.397118	0.290315
	22.5	0.338329	0.138192	-0.00045066	0.146766	0.432854	0.318518	0.0844116	0.380066
	23	0.27704	0.186395	-0.0088385	0.166438	0.389031	0.322964	0.318827	0.584966
	23.5	0.434179	0.216596	0.20884	0.1346	0.0679724	0.346625	0.369028	0.553056
	24	0.49245	0.245778	0.329823	0.161039	0.0886752	0.345185	0.538747	0.525491
	24.5	0.302808	0.272299	0.172901	0.17935	0.157005	0.327172	0.25251	0.343751
	25	0.099671	0.234696	0.0970857	0.230789	0.224773	0.260494	0.173309	0.327862
	25.5	0.470087	0.175709	0.0905637	0.198518	0.300383	0.260627	0.266131	0.219168
	26	0.253456	0.246554	0.0761286	0.226949	0.118331	0.249831	0.129522	0.328166
	26.5	0.703224	0.185076	-0.00454462	0.279325	0.138421	0.280676	0.308949	0.319496
	27	0.772787	0.118494	0.180035	0.219048	0.425227	0.373004	0.353744	0.255802
	27.5	0.59843	0.164974	0.210507	0.257884	0.679569	0.335557	0.303515	0.295702
	28	0.463662	0.123301	0.193487	0.257542	0.671274	0.321981	-0.0643753	0.235525
	28.5	0.383044	0.111868	-0.0314014	0.186172	0.528439	0.274789	-0.103326	0.230134
	29	0.133589	0.156086	0.193097	0.183218	0.206443	0.320891	-0.177247	0.248125
	29.5	-0.165477	0.199344	0.269446	0.173939	0.285744	0.373284	-0.121407	0.221034
	30	0.0115399	0.0875076	0.362267	0.156034	0.120772	0.354843	-0.232404	0.374328
	30.5	0.131359	0.238625	0.27829	0.220452	0.280305	0.330586	-0.272901	0.359418
	31	0.300216	0.237251	0.101166	0.252214	0.0743383	0.29916	-0.436472	0.278979
	31.5	0.374676	0.156931	0.0460553	0.24233	0.130693	0.355512	-0.704984	0.283401
	32	0.354627	0.137956	0.366511	0.257072	0.149745	0.359997	-0.687147	0.223429
	32.5	0.43253	0.196001	0.322651	0.229227	0.0647142	0.379068	-0.734566	0.208042
	33	0.522867	0.203336	0.564997	0.187761	0.056802	0.377863	-0.733917	0.33978
	33.5	0.146909	0.195418	0.733995	0.254955	0.7316	0.395943	-0.511838	0.318503
	34	-0.0452664	0.273069	0.604917	0.224324	0.716296	0.340964	-0.443591	0.469989
	34.5	0.0656933	0.264823	0.418331	0.238965	0.54086	0.312849	-0.0281957	0.495291
	35	-0.0632541	0.247811	0.392575	0.202114	0.417737	0.291972	-0.389752	0.398669
	35.5	-0.0402243	0.189192	0.392168	0.204419	0.325274	0.323359	-0.119199	0.395159
	36	0.14277	0.12751	0.387513	0.201659	-0.0874011	0.287735	-0.15235	0.306905
	36.5	0.41397	0.139636	0.429515	0.197975	-0.220442	0.307029	-0.245833	0.359904
	37	0.446788	0.0457941	0.51364	0.248189	-0.350962	0.335999	0.0658075	0.444768
	37.5	0.277069	0.163617	0.835262	0.285466	-0.688269	0.25512	0.178234	0.404196
	38	-0.156713	0.134241	0.519033	0.286113	-0.231153	0.240045	-0.222722	0.432613
	38.5	3.82505e-05	0.199669	0.479127	0.291618	-0.0843825	0.264668	-0.358749	0.407299
	39	0.0508374	0.217071	0.452201	0.281947	0.0980453	0.307802	-0.304009	0.427636
	39.5	0.257792	0.189206	0.561633	0.286542	0.152559	0.284387	-0.341334	0.394148
	40	0.280963	0.190139	0.463635	0.299739	0.193932	0.352369	-0.577216	0.448044
	40.5	0.532878	0.138234	0.451587	0.210781	0.0272715	0.361128	-0.175522	0.37244
	41	0.466881	0.221099	0.565371	0.255427	-0.212234	0.267106	-0.135586	0.416627
	41.5	0.231223	0.22436	0.56165	0.230643	-0.31728	0.35228	-0.090385	0.30062
	42	-0.0333926	0.231062	0.441892	0.28697	-0.543352	0.305953	-0.293773	0.482757
	42.5	0.11059	0.26427	0.509196	0.260881	-0.506509	0.290916	-0.367206	0.34841
	43	0.162544	0.272498	0.330535	0.278299	-0.403598	0.255287	-0.343147	0.321016
	43.5	-0.0874626	0.288721	0.148547	0.225676	-0.534952	0.20986	-0.504925	0.426506
	44	-0.0474817	0.353931	0.0482748	0.135659	-0.345398	0.224025	-0.698782	0.505527
	44.5	-0.207114	0.39732	0.411794	0.206453	-0.338028	0.331073	-0.832547	0.417404
	45	-0.295439	0.384812	0.16618	0.251778	-0.261063	0.335675	-0.821523	0.476952
	45.5	-0.446209	0.343166	0.0224047	0.223063	-0.491339	0.361036	-0.777861	0.434303
	46	-0.266716	0.323063	0.0811482	0.250347	-0.337935	0.352601	-0.91151	0.436162
	46.5	-0.243666	0.273533	0.0418658	0.292458	-0.253763	0.387518	-1.08072	0.28826
	47	-0.176105	0.256725	-0.0228794	0.267658	-0.246649	0.393205	-1.32046	0.468582
	47.5	0.0250963	0.247307	0.0660621	0.30908	-0.032952	0.297423	-1.04717	0.38118
	48	-0.0496614	0.28314	0.199417	0.282066	-0.0479496	0.311181	-0.840959	0.495702
	48.5	-0.0498528	0.318363	0.0545582	0.291904	0.104704	0.384878	-0.796706	0.44134
	49	-0.0498975	0.313319	-0.00725449	0.31453	-0.21993	0.255089	-0.444397	0.378732
	49.5	-0.119684	0.323654	0.0502513	0.26867	-0.101719	0.34264	-0.149402	0.370142
	50	-0.447081	0.349612	-0.139797	0.192931	-0.463815	0.385083	-0.451859	0.381596
	50.5	-0.297979	0.296406	-0.353825	0.274085	-0.397917	0.480576	-0.555231	0.447694
	51	-0.458667	0.323726	-0.441841	0.326374	-0.542956	0.441019	-0.458305	0.514245
	51.5	-0.516174	0.379612	-0.107319	0.339306	-0.549638	0.436531	-0.966063	0.525205
	52	-0.576009	0.367949	-0.116072	0.352289	-0.816667	0.37153	-1.20989	0.540634
	52.5	-0.453136	0.376198	-0.257466	0.311594	-0.671313	0.405507	-1.2765	0.518181
	53	-0.524985	0.398322	-0.220071	0.335683	-0.809944	0.409007	-1.66837	0.525595
	53.5	-0.565877	0.345322	-0.0784819	0.212016	-0.692933	0.397596	-1.78442	0.545396
	54	-0.286988	0.310793	-0.10455	0.178179	-0.72268	0.448	-1.62285	0.549189
	54.5	-0.100719	0.308903	-0.298892	0.182793	-0.653055	0.402084	-1.5686	0.504799
	55	-0.244234	0.323298	-0.197186	0.343989	-0.642992	0.433104	-1.01364	0.434248
	55.5	-0.248579	0.254956	-0.309034	0.266071	-0.824404	0.430057	-1.0577	0.365501
	56	-0.339384	0.259771	-0.458557	0.257753	-1.33944	0.355618	-1.08544	0.364671
	56.5	-0.384659	0.382022	-0.628131	0.287295	-1.60471	0.321882	-1.74686	0.396186
	57	-0.689637	0.405823	-0.702151	0.339514	-1.77739	0.348594	-2.04276	0.373199
	57.5	-0.542265	0.389354	-0.648812	0.261583	-1.91885	0.261538	-2.15285	0.339586
	58	-0.68909	0.39526	-0.829365	0.27639	-2.00058	0.250766	-2.04763	0.481195
	58.5	-0.680487	0.384908	-0.436534	0.296139	-2.14289	0.30102	-1.64845	0.478507
	59	-0.670391	0.370915	-0.349125	0.346228	-2.01869	0.415509	-1.4755	0.536475
	59.5	-0.934115	0.373824	-0.57421	0.351591	-2.03972	0.426393	-1.4214	0.544796
	60	-0.960912	0.348395	-0.614268	0.395546	-2.0241	0.543165	-1.61398	0.564652
	60.5	-1.12505	0.373507	-0.537693	0.308356	-1.72851	0.64686	-0.995611	0.356984
	61	-0.346751	0.412552	-0.668	0.384652	-0.473472	0.811672	-0.218732	0.84607
	61.5	0.298605	0.629616	0.317857	0.930599	0.382689	0.860533	1.38399	1.10677
	62	0.701718	0.791032	3.08029	1.63818	0.783633	0.945411	2.35506	1.53552
	62.5	2.04826	0.8512	2.84302	1.82312	1.23898	0.883004	4.51375	2.11745
	63	3.31593	1.10333	4.27726	1.73993	1.61043	0.91838	4.11548	2.05306
	63.5	4.067	1.17445	5.43193	1.49022	1.60307	0.752255	4.54587	1.91911
	64	3.80877	1.16799	5.01446	1.51692	1.81107	0.544268	4.79161	1.83272
	64.5	3.62718	1.35505	4.53732	1.51115	2.50428	0.470465	4.87439	1.8063
	65	3.2266	1.12319	4.84427	1.32011	2.41245	0.366251	3.87003	1.40809
	65.5	2.66035	0.994508	4.43008	1.36214	2.17255	0.446873	3.88076	1.18389
	66	2.47344	0.852481	4.41903	1.30451	2.07187	0.500301	3.58536	1.11512
	66.5	2.06418	0.669779	4.51721	1.09678	1.80078	0.575141	3.52202	1.0781
	67	1.76289	0.584819	4.57914	1.11965	1.51965	0.465735	3.07239	1.17414
	67.5	1.82446	0.574187	4.81774	0.982558	1.54901	0.492625	3.31976	1.12398
	68	1.5143	0.545784	5.01983	0.866551	1.32727	0.521178	2.77922	1.34726
	68.5	1.34966	0.563777	4.47957	0.858911	1.29197	0.524206	2.63855	1.32441
	69	1.36882	0.58985	4.44646	0.670321	1.28614	0.528792	1.94974	1.18783
	69.5	1.64856	0.61999	4.10871	0.728022	1.05469	0.515882	1.67961	1.06692
	70	1.55781	0.606253	3.91433	0.773863	1.17225	0.446297	1.29976	1.01989
	70.5	1.90408	0.576665	3.83659	0.82938	1.26101	0.488158	0.89272	0.918425
	71	1.71208	0.50532	3.83601	0.886368	1.54246	0.359983	1.09882	0.85691
	71.5	1.71174	0.541644	3.60239	1.01348	1.19833	0.490396	1.48234	0.8429
	72	1.46469	0.547054	3.52777	1.04579	1.46553	0.40267	1.61244	0.911084
	72.5	1.34707	0.566511	3.51418	1.01583	1.76708	0.356492	1.80961	0.856551
	73	1.42454	0.615576	3.52059	1.10131	1.96963	0.376991	2.34759	1.00858
	73.5	1.51977	0.586073	3.79558	1.0391	1.24838	0.421363	2.63551	0.871772
	74	1.58468	0.615996	3.88149	1.15433	1.05715	0.490428	2.73617	0.892147
	74.5	1.6436	0.583752	3.88817	1.11998	1.29388	0.395102	2.59548	0.981872
	75	1.58077	0.54151	3.6638	0.882658	1.34237	0.396483	2.07068	0.887504
	75.5	1.55073	0.551247	3.7596	0.902528	0.917875	0.407681	2.06754	0.86231
	76	1.62246	0.521803	3.65679	1.04193	1.21864	0.379038	1.94778	1.08541
	76.5	1.20879	0.543564	3.14296	0.766954	1.11829	0.376649	2.0368	1.29083
	77	1.11646	0.552318	3.28575	0.929771	1.15582	0.405825	2.41963	1.2094
	77.5	1.10537	0.517582	3.13059	1.00618	0.865679	0.453485	2.4421	1.32763
	78	1.32181	0.580145	3.22739	0.999028	0.943381	0.446651	3.04919	1.28379
	78.5	1.36359	0.57654	3.1143	0.978833	0.976895	0.467187	2.8706	1.02445
	79	1.35513	0.565957	3.27799	0.998905	1.25084	0.469179	2.44724	1.19172
	79.5	1.34504	0.572312	3.24614	0.971506	0.961752	0.487972	2.37038	1.16237
	80	1.58073	0.549157	3.3279	1.00858	1.08253	0.514309	2.30164	1.08767
	80.5	1.73678	0.502365	3.62668	0.989053	0.788386	0.526156	2.28684	1.08598
	81	1.80302	0.525812	3.4799	1.03831	0.904974	0.519476	2.31116	1.00002
	81.5	1.98083	0.683297	3.49504	1.0442	0.772093	0.506336	1.94892	0.952764
	82	1.99094	0.670298	3.32276	1.03	1.04403	0.498908	2.18948	1.09191
	82.5	1.62179	0.725372	3.02667	0.955245	0.925037	0.497403	2.13941	1.13954
	83	1.31745	0.638597	2.84002	0.996843	1.03314	0.522524	2.09311	1.09434
	83.5	1.42771	0.713478	2.88434	1.01394	1.11131	0.519437	2.02095	0.921326
	84	1.49974	0.653144	2.79531	0.99877	1.12848	0.576856	2.2328	1.07814
	84.5	1.37914	0.582853	2.98771	0.970675	1.18426	0.646889	2.57659	1.00688
	85	1.42286	0.576845	3.20849	0.990558	1.22861	0.691874	3.02959	1.11116
	85.5	1.80674	0.570057	3.30475	0.947011	0.894161	0.736601	3.26794	1.14581
	86	1.60379	0.514354	3.27171	0.909042	1.08601	0.780499	2.94994	1.15895
	86.5	1.94795	0.444558	3.29814	0.903106	0.657167	0.751123	3.05736	1.31935
	87	1.97992	0.4554	3.38267	0.94876	0.4588	0.734191	2.71897	1.17635
	87.5	1.99579	0.413666	3.50565	0.716974	0.541376	0.646559	2.49975	1.07292
	88	1.73356	0.44053	3.06739	0.659007	0.597718	0.631122	2.34832	1.03444
	88.5	1.62095	0.462321	3.56561	0.691551	0.508136	0.62291	3.02301	1.01388
	89	1.61016	0.442762	3.41168	0.781149	0.701684	0.578901	3.25918	1.00213
	89.5	1.49692	0.49502	3.76341	0.739899	0.878458	0.59274	2.93266	1.05097
	90	1.38464	0.45652	3.92939	0.833647	0.776013	0.561881	3.04292	1.10412
	90.5	1.74904	0.54554	3.91082	0.897119	0.524048	0.588196	3.52037	1.2462
	91	1.59509	0.510157	3.75327	0.883071	0.950954	0.662282	3.59845	1.26005
	91.5	1.54721	0.621541	3.73621	0.912405	1.01322	0.644657	3.15059	1.33991
	92	1.63177	0.601167	3.92716	0.8948	0.718649	0.586138	3.69968	1.36204
	92.5	1.56265	0.56293	3.97179	0.961221	0.638849	0.564427	4.07809	1.41246
	93	1.8382	0.574473	4.0615	0.88326	0.905258	0.543853	3.48271	1.33032
	93.5	1.81881	0.574278	3.56384	1.00482	0.705262	0.532948	3.26536	1.32179
	94	1.60533	0.567758	3.76994	0.885245	0.77149	0.61253	3.76389	1.19501
	94.5	1.72608	0.570114	3.47502	0.996265	0.794622	0.631582	3.73108	1.39009
	95	1.74911	0.614658	3.11768	0.970737	0.955121	0.611437	3.07683	1.25967
	95.5	1.7099	0.644731	3.25977	0.985407	0.913041	0.656039	3.2758	1.43873
	96	1.68587	0.639305	3.44364	0.940508	0.923235	0.690005	3.58115	1.4261
	96.5	1.93417	0.704445	3.294	0.987895	0.903039	0.679134	3.10958	1.37796
	97	1.67874	0.695446	3.24238	0.971923	0.829642	0.698145	3.36373	1.40515
	97.5	1.92837	0.552103	3.71049	1.0018	0.978991	0.705626	3.52241	1.39299
	98	2.06313	0.542417	3.50545	0.996568	0.867318	0.632658	3.64237	1.38892
	98.5	2.11223	0.557486	3.43187	1.0125	0.857073	0.655455	3.72685	1.33797
	99	2.08137	0.523117	3.78707	1.01614	0.918865	0.626675	3.96284	1.31624
	99.5	2.1433	0.58886	3.81351	0.928634	1.10274	0.611069	3.98642	1.2989
	100	1.81185	0.62328	3.67913	0.918918	0.738983	0.584137	3.51454	1.35926
	100.5	1.79951	0.605215	3.9855	1.02432	0.909687	0.599916	3.63963	1.31074
	101	1.86821	0.588905	4.16961	1.10906	0.73918	0.620205	3.45859	1.26403
	101.5	1.76238	0.620328	4.45597	1.01959	1.13834	0.640265	3.39289	1.21411
	102	1.79334	0.598733	4.41085	0.989289	0.858628	0.60604	3.57433	1.19763
	102.5	1.89812	0.556959	4.14633	0.990737	0.67056	0.657419	3.52533	1.31854
	103	1.73355	0.572265	4.09469	0.966878	0.900739	0.618184	3.61393	1.27607
	103.5	1.92235	0.6921	4.04481	0.774207	0.591876	0.618925	3.34901	1.32842
	104	1.48334	0.626948	4.02257	0.775407	0.531169	0.664553	3.56928	1.3805
	104.5	1.7413	0.564838	4.15226	0.866564	0.595514	0.636384	3.5942	1.36993
	105	1.50852	0.504024	4.30215	0.901095	0.523138	0.548493	3.5218	1.31928
	105.5	1.56809	0.4855	4.24125	0.851187	0.679713	0.610603	3.38536	1.26348
	106	1.37524	0.525574	4.66973	0.883348	0.692033	0.60895	3.66476	1.13172
	106.5	1.74051	0.586122	4.59738	0.916066	0.662273	0.578245	3.39496	1.19729
	107	2.01909	0.591359	4.34877	0.883904	0.787605	0.547926	3.45472	1.36306
	107.5	1.97903	0.643614	4.44103	0.835993	0.757658	0.560116	3.77935	1.30479
	108	1.73864	0.668692	4.53454	0.87514	1.21033	0.505876	4.09791	1.29318
	108.5	2.11666	0.682474	4.18395	0.924399	1.26775	0.525739	3.64241	1.33973
	109	2.09278	0.755051	4.34141	0.998965	1.30712	0.531511	3.82585	1.15879
	109.5	1.91165	0.653115	4.39088	1.09901	1.1738	0.487944	3.75474	1.0751
	110	1.80101	0.750387	4.61315	1.14635	1.60852	0.643938	3.74505	1.06661
	110.5	2.0141	0.65504	4.36344	1.17312	1.04359	0.63191	3.55929	1.15931
	111	1.73339	0.653105	4.48023	1.14936	0.497794	0.693141	3.5565	1.17223
	111.5	1.8974	0.57628	4.66187	1.15126	0.373978	0.626974	3.56313	1.24019
	112	1.83899	0.61672	4.72023	1.11097	0.345086	0.689767	3.66397	1.23159
	112.5	1.65805	0.586205	4.53984	1.10177	0.179932	0.804066	3.67055	1.26228
	113	1.70419	0.539024	4.48784	1.02424	0.435969	0.846056	3.84419	1.21726
	113.5	1.79614	0.511437	4.39404	0.927888	0.761526	0.896082	3.81546	1.28459
	114	1.71904	0.54296	4.45427	0.877838	0.804946	0.916869	3.84556	1.3221
	114.5	1.67117	0.534986	4.30656	0.953531	0.711243	0.806892	3.65166	1.28558
	115	1.99441	0.55432	4.74459	0.916502	0.601828	0.773157	3.57688	1.10743
	115.5	1.64099	0.507668	5.0154	0.844264	0.39822	0.736326	3.49343	1.09872
	116	1.81514	0.6001	4.74708	0.921504	0.172931	0.74864	3.83149	1.00637
	116.5	1.95496	0.672056	4.6273	1.03936	0.40055	0.736635	3.8319	0.9889
	117	1.60994	0.643999	4.68512	1.07892	0.613351	0.802019	4.01776	1.06586
	117.5	1.77529	0.59098	4.89269	1.0333	1.15816	0.735554	4.06926	1.18997
	118	1.58798	0.721427	4.80783	1.08999	1.17228	0.75696	3.73487	1.2564
	118.5	1.94261	0.60747	4.69271	0.949623	1.18533	0.822623	3.39075	1.26384
	119	1.83698	0.630846	4.59047	0.834868	0.725195	0.716067	3.6231	1.26455
	119.5	1.7695	0.633171	4.83642	0.891217	1.00536	0.803714	3.76529	1.18892
	120	1.53365	0.627356	4.82141	0.990954	0.474692	0.726268	3.97588	1.21256
	120.5	1.66892	0.462253	5.12446	0.954155	0.459763	0.740911	4.07546	1.21582
	121	1.69317	0.528512	5.2071	0.99931	0.145944	0.754274	4.38287	1.25583
	121.5	1.79622	0.480873	5.1028	0.93539	0.337131	0.770131	4.05907	1.22021
	122	1.4433	0.429928	5.32939	0.933399	0.00134114	0.785457	4.04232	1.23912
	122.5	1.46712	0.555366	5.30976	0.985791	0.105413	0.823305	3.94561	1.34489
	123	1.79669	0.555608	5.45171	0.9855	0.275256	0.893635	3.7182	1.28748
	123.5	1.6238	0.667108	5.18954	1.00859	0.598449	0.844227	3.39175	1.33462
	124	1.7969	0.673006	5.08609	1.02269	0.233819	0.851779	3.44799	1.30562
	124.5	1.79556	0.640601	5.05423	1.04014	0.666286	0.840509	3.81872	1.31419
	125	1.92455	0.609321	4.98842	1.02724	0.365885	0.866319	3.8166	1.16328
	125.5	1.832	0.551347	4.73278	1.06384	0.297457	0.764152	4.50888	1.20261
	126	1.88159	0.509477	4.80398	1.03715	0.338708	0.855541	4.58179	1.19724
	126.5	1.93484	0.53473	5.04129	1.0189	0.262925	0.84448	4.84992	1.30201
	127	1.29607	0.580252	4.87191	0.896784	-0.0460935	0.831537	4.41005	1.20182
	127.5	1.05139	0.634939	5.047	0.930572	0.192659	0.887497	4.34805	1.19947
	128	0.969656	0.616595	5.04918	0.885749	-0.153579	0.932453	3.92153	1.28629
	128.5	0.915428	0.595472	5.33624	0.822267	-0.50594	0.948661	3.8209	1.36402
	129	0.844	0.553166	5.16199	0.867313	-0.208356	0.884792	3.50389	1.20352
	129.5	1.20188	0.571124	5.03479	0.830315	0.00152037	0.882767	3.66685	1.31244
	130	1.42682	0.483256	4.9322	0.855942	-0.304375	0.880473	3.93141	1.21706
	130.5	1.38034	0.561233	4.9692	0.811715	0.100484	0.883307	4.30819	1.19285
	131	1.31671	0.566843	5.11707	0.885827	-0.0221686	0.926589	4.32057	1.08179
	131.5	1.32484	0.573603	4.94713	0.867545	-0.262329	0.884625	4.40795	1.11122
	132	1.41445	0.556702	5.38412	0.966685	-0.225853	0.888342	4.65572	1.13037
	132.5	1.22316	0.64734	5.38305	0.936152	-0.248821	0.936762	4.46385	1.26218
	133	1.28892	0.712731	5.55173	0.939313	-0.403886	0.88403	4.2362	1.27341
	133.5	1.66481	0.676517	5.51617	0.9817	-0.532684	0.920746	3.7118	1.29506
	134	1.49417	0.58099	5.51455	0.901988	-0.193793	0.93973	3.45608	1.29843
	134.5	1.43309	0.682155	5.56428	0.92045	-0.511888	0.947168	3.31084	1.15314
	135	1.43049	0.571286	5.42526	0.921053	-0.523997	0.858446	3.12681	1.25702
	135.5	1.11963	0.656555	5.21543	0.890706	-0.82289	0.830994	3.11099	1.16305
	136	1.03152	0.642732	5.53663	1.01386	-0.40021	0.810513	3.53979	1.40692
	136.5	1.53496	0.653907	5.62051	0.984802	-0.232882	0.907527	3.81398	1.41431
	137	1.43916	0.668785	5.46925	0.922923	-0.329523	0.857993	3.72572	1.40045
	137.5	1.73679	0.642409	5.61323	0.864736	-0.280567	0.903756	4.15824	1.39339
	138	1.68507	0.665386	5.49924	0.91383	-0.0715993	0.921502	4.85868	1.55225
	138.5	1.58259	0.669499	5.57723	0.935982	0.0120229	0.884946	4.69315	1.51848
	139	1.21186	0.568971	5.50147	0.979088	0.171002	0.859318	4.33347	1.28109
	139.5	1.29671	0.725799	5.6735	1.00946	0.34175	0.897956	4.32663	1.47984
	140	1.25111	0.673616	5.53005	1.07502	0.114794	0.886544	3.97415	1.44945
	140.5	1.23277	0.660774	5.31382	1.03289	0.241857	0.821026	3.48089	1.27253
	141	1.1183	0.618735	5.64176	1.04899	0.24003	0.813803	4.02999	1.28826
	141.5	1.46009	0.59871	5.26309	1.06253	0.122596	0.748739	3.75799	1.33265
	142	1.43375	0.517121	5.01898	1.00747	0.103349	0.724575	3.55129	1.349
	142.5	1.45933	0.483503	5.296	0.964671	-0.0851125	0.747079	3.84529	1.31178
	143	1.14453	0.440136	5.17729	0.903922	-0.0304262	0.763755	3.63125	1.26086
	143.5	1.26733	0.468797	5.41385	1.024	-0.198444	0.817246	3.66368	1.26976
	144	1.33362	0.539542	5.35837	1.01951	-0.212504	0.800659	3.60221	1.21474
	144.5	1.40413	0.59687	5.45645	1.01423	-0.224595	0.795806	3.75311	1.2385
	145	1.11687	0.627239	5.56837	1.02144	-0.105482	0.798175	3.71958	1.37303
	145.5	1.30361	0.624868	5.59645	0.978567	-0.199221	0.777649	3.69592	1.44457
	146	1.25943	0.67893	5.46931	0.949716	0.058098	0.79752	3.84059	1.44872
	146.5	1.34236	0.660214	5.71136	0.946669	0.055041	0.780281	4.35999	1.55656
	147	1.54183	0.702139	5.49445	0.901945	0.208593	0.754352	4.31359	1.57009
	147.5	1.43556	0.699809	5.80057	1.02202	-0.249222	0.715047	4.40792	1.40378
	148	1.31901	0.749113	6.31617	1.03814	-0.0654953	0.706113	4.10277	1.35403
	148.5	1.52324	0.792857	6.36209	1.06632	-0.109543	0.722528	3.83418	1.31091
	149	1.2558	0.767736	6.19437	1.07795	-0.277444	0.740357	3.7755	1.34105
	149.5	1.02148	0.681763	6.22045	1.01486	-0.00813407	0.826232	4.22805	1.46854
	150	1.20618	0.798225	6.1818	0.991565	0.081031	0.846221	3.88858	1.49378
	150.5	1.23086	0.700253	5.91618	0.987208	0.0993896	0.827916	3.97612	1.53849
	151	1.19048	0.734838	5.87567	0.956409	-0.0160936	0.880729	4.00307	1.52435
	151.5	1.25504	0.696312	6.05236	1.02414	0.19648	0.825005	3.98323	1.48675
	152	1.16934	0.712594	5.75332	1.06645	0.0307864	0.805171	4.03239	1.5231
	152.5	0.880389	0.613131	5.76559	1.04643	-0.0719297	0.784692	4.43606	1.41743
	153	1.15792	0.715616	5.76978	1.09178	-0.414399	0.802705	4.5081	1.51137
	153.5	1.39311	0.714325	5.50048	1.07535	-0.38912	0.809787	4.36415	1.60335
	154	1.50627	0.732144	5.37828	1.12735	-0.538123	0.834603	4.57486	1.67832
	154.5	1.60913	0.764782	5.87015	1.0252	-0.260566	0.832927	4.685	1.57229
	155	1.43524	0.727524	5.91481	0.861987	-0.336847	0.862473	4.90232	1.61972
	155.5	1.18064	0.673636	5.83699	0.857718	-0.127281	0.816314	4.58813	1.6324
	156	1.14229	0.715737	5.97866	0.850347	-0.415341	0.780765	4.42782	1.52505
	156.5	1.16384	0.638897	5.90461	0.876058	-0.396925	0.798784	4.17012	1.50278
	157	0.895167	0.550019	6.08763	0.970094	-0.513603	0.805019	4.28151	1.49929
	157.5	1.0873	0.619564	6.01488	0.960967	-0.733911	0.7145	3.97243	1.38665
	158	1.0538	0.633844	6.08635	0.942028	-0.765221	0.804602	4.52736	1.31013
	158.5	1.03539	0.607934	6.04806	0.923532	-0.70438	0.786617	4.64117	1.43486
	159	1.25482	0.63093	6.31777	0.872227	-0.540482	0.809996	4.61245	1.33318
	159.5	1.40256	0.682851	6.22229	0.934335	-0.588391	0.81794	4.20578	1.35261
	160	0.828543	0.63536	6.26276	0.933036	-0.688249	0.847677	4.52429	1.48359
	160.5	0.872408	0.593232	6.34293	0.948891	-0.872601	0.905476	4.65494	1.54685
	161	0.878876	0.6107	6.37646	0.947714	-1.07204	0.883541	4.78008	1.62169
	161.5	0.87336	0.592667	6.57552	1.02662	-1.00569	0.92301	4.59329	1.66449
	162	1.10406	0.576571	6.23097	0.886332	-1.22127	0.899091	4.65794	1.68828
	162.5	0.822491	0.652868	6.2099	0.895435	-1.12091	0.870303	4.48394	1.59921
	163	0.659461	0.696218	6.3599	0.996173	-1.12517	0.917798	4.8536	1.70729
	163.5	0.913071	0.699772	5.86423	1.01353	-1.18995	0.948318	4.30389	1.37896
	164	0.968646	0.664502	5.85909	1.02809	-0.849206	0.945277	4.51948	1.37754
	164.5	0.914867	0.689751	5.83918	1.05882	-1.01771	0.939704	4.29046	1.38276
	165	0.969314	0.674103	5.97165	1.04341	-0.978234	0.910339	4.22773	1.34946
	165.5	1.02695	0.729468	6.14923	1.00217	-0.981751	0.907667	4.5107	1.31375
	166	0.908149	0.765914	6.55476	1.01143	-1.33889	0.846077	4.66393	1.36083
	166.5	0.714219	0.750191	6.82462	1.03406	-1.15211	0.87318	4.92527	1.49004
	167	0.756934	0.763889	6.83387	1.05702	-1.41494	0.848771	4.95891	1.58098
	167.5	0.986831	0.661205	6.8648	1.0543	-1.12969	0.867913	5.13569	1.56045
	168	0.823093	0.737412	6.52921	0.954043	-1.10625	0.825922	4.64498	1.60769
	168.5	1.01218	0.619802	6.35537	0.931281	-1.23365	0.895765	4.57262	1.5765
	169	1.07712	0.695758	6.57831	0.947019	-1.53081	0.894689	4.71725	1.5495
	169.5	0.889084	0.645689	6.56868	1.04392	-1.00394	0.909762	4.29664	1.33385
	170	0.857205	0.669547	6.66396	1.04163	-1.20986	0.901223	4.39768	1.4092
	170.5	0.718967	0.57921	6.76263	0.947797	-1.22293	0.875517	4.3585	1.39288
	171	0.679078	0.666478	6.62139	0.927214	-1.18071	0.862378	4.08584	1.44649
	171.5	0.67717	0.717489	6.81447	0.943696	-1.13124	0.851454	3.86274	1.4261
	172	0.450819	0.727149	7.20994	0.957228	-1.15982	0.857556	4.16706	1.52867
	172.5	0.567055	0.678683	7.02381	0.9757	-1.28074	0.824386	3.93301	1.51167
	173	0.691071	0.636061	7.14369	1.02376	-0.87656	0.930364	4.01133	1.51008
	173.5	0.385199	0.602226	7.09177	1.09364	-0.845886	0.958566	3.50284	1.46101
	174	0.327672	0.604306	6.94105	1.07463	-0.971089	0.947171	3.9059	1.40676
	174.5	0.543512	0.679744	6.59235	1.03367	-0.971574	0.954348	3.80919	1.46206
	175	0.485758	0.648749	6.82581	1.08332	-0.583465	1.01608	4.09215	1.4746
	175.5	0.43794	0.744709	6.5862	1.12136	-0.691695	0.903124	3.95408	1.64531
	176	0.715976	0.757362	6.73105	1.08081	-0.63304	0.871947	4.0767	1.51655
	176.5	0.708589	0.752552	6.8618	1.02938	-0.605695	0.860452	4.05064	1.51863
	177	0.804694	0.738587	7.17067	0.975441	-1.25755	0.892807	3.84473	1.61075
	177.5	0.40103	0.671858	6.78456	0.896461	-1.57837	0.913656	3.7424	1.52576
	178	0.410392	0.64896	6.76001	0.872468	-1.07867	0.798423	4.04718	1.54411
	178.5	0.338889	0.594369	6.46066	0.856073	-0.898682	0.908354	4.45045	1.65224
	179	0.0395862	0.55462	5.958	0.861679	-0.689081	0.939038	4.29375	1.67361
	179.5	0.195725	0.623117	5.89162	0.890367	-0.681048	0.93264	4.77026	1.68394
	180	0.294611	0.646279	6.14428	0.838588	-0.587252	0.961863	4.7757	1.68134
	180.5	0.424792	0.632791	6.19507	0.853177	-0.63435	0.943243	4.95526	1.73958
	181	0.364276	0.719226	6.62734	0.948899	-0.910991	0.988532	4.50821	1.6374
	181.5	0.468175	0.703269	6.69917	0.997135	-1.14414	0.945366	4.6793	1.60051
	182	0.606771	0.710237	6.57446	1.08586	-0.890114	0.986575	4.67364	1.59564
	182.5	0.224442	0.76734	6.38214	1.06517	-1.25667	1.02924	4.64594	1.48555
	183	0.116633	0.772268	6.6254	1.06867	-1.4015	0.98158	4.53128	1.56444
	183.5	0.0802798	0.690803	6.59521	1.06892	-1.30918	0.965091	4.45262	1.47925
	184	0.0489433	0.739286	6.88706	1.06037	-1.05696	0.86033	4.20311	1.52281
	184.5	0.18839	0.697178	6.94769	1.14178	-1.02527	0.887469	4.7809	1.48751
	185	0.34865	0.636744	6.64076	1.10939	-1.20348	0.88228	4.6273	1.4624
	185.5	0.0240861	0.616247	6.14328	1.1148	-1.05773	0.8628	4.57447	1.54667
	186	-0.0994312	0.63896	6.1429	1.11237	-1.01867	0.897138	4.45421	1.68315
	186.5	-0.115168	0.60669	6.11544	1.10643	-1.00352	1.01345	4.36875	1.65143
	187	-0.329485	0.636034	6.15761	1.0231	-0.939312	1.03298	3.91329	1.71577
	187.5	-0.371642	0.614011	6.14143	0.925453	-0.957652	1.07817	4.47	1.68973
	188	-0.445554	0.569597	6.14543	0.942515	-1.16572	0.976538	4.25116	1.66688
	188.5	-0.13725	0.580034	6.61092	1.03885	-0.987696	1.07903	4.56617	1.64684
	189	0.135286	0.667491	6.46345	0.974275	-1.1725	1.03457	4.88326	1.61668
	189.5	0.0459811	0.654137	6.48535	0.92024	-1.19192	1.08059	4.85552	1.59205
	190	0.155139	0.65268	6.53247	0.852885	-1.09996	0.965337	4.70861	1.4462
	190.5	-0.00482656	0.613648	6.82387	0.928512	-0.971109	1.0207	4.72626	1.5024
	191	-0.0949059	0.572158	6.79885	0.951253	-0.705482	0.994312	4.9366	1.62541
	191.5	-0.0647347	0.533794	6.89733	1.0675	-0.614255	0.969305	5.08693	1.68518
	192	0.104688	0.551299	6.94132	1.05052	-0.780277	1.02818	5.07583	1.57299
	192.5	0.2069	0.541112	6.98497	1.07694	-1.04761	1.10027	5.67397	1.74647
	193	0.401135	0.587761	6.97249	1.01869	-1.324	1.06724	5.58402	1.7896
	193.5	0.326695	0.631847	6.91304	1.01565	-1.10198	1.09444	4.95573	1.76874
	194	0.351291	0.606615	6.48845	1.11127	-1.03407	1.04317	4.98382	1.68259
	194.5	0.278184	0.663498	6.67354	1.14299	-0.833027	1.0207	5.09302	1.62882
	195	0.518562	0.781827	6.63821	1.33269	-0.690719	0.99534	4.7896	1.55461
	195.5	0.329045	0.605277	6.67924	1.37146	-0.747683	0.933721	4.85771	1.60678
	196	0.144736	0.72192	6.72593	1.3078	-0.647616	0.955553	4.73656	1.58584
	196.5	0.0390464	0.70386	6.71944	1.21983	-0.883155	0.948345	4.94403	1.46319
	197	0.139225	0.77498	6.48584	0.956043	-0.9714	0.914905	5.1414	1.43878
	197.5	0.101333	0.725644	6.6151	0.952501	-0.663577	0.917091	4.90157	1.52183
	198	0.299674	0.752319	6.6466	0.88122	-0.50127	0.912404	4.97727	1.33795
	198.5	0.193994	0.75419	6.63307	0.876092	-0.501642	1.02753	4.72786	1.42014
	199	0.28284	0.821766	6.58739	0.893895	-0.729213	0.976543	5.24162	1.60485
	199.5	0.301919	0.750477	6.29319	0.868364	-1.02642	0.979262	5.17081	1.63402
	200	0.381698	0.73153	6.30406	0.917636	-1.07596	1.01068	5.87182	1.59783
	200.5	0.293693	0.722103	6.22605	0.922026	-0.928994	1.05171	5.96288	1.64954
	201	0.42808	0.706864	6.37226	0.890734	-1.16032	1.03426	6.04098	1.55496
	201.5	0.686996	0.714831	6.17722	0.884626	-1.36956	0.965736	5.69416	1.57455
	202	0.681982	0.758316	6.50411	0.856822	-0.996576	1.00317	5.54658	1.53899
	202.5	0.678264	0.72412	6.46707	0.985691	-1.17094	0.918211	4.9135	1.33148
	203	0.435113	0.699099	6.66556	1.07561	-1.16818	0.905251	5.01693	1.35878
	203.5	0.169431	0.688471	6.91654	1.10511	-1.40333	0.863316	4.61074	1.4201
	204	0.114107	0.702517	7.41238	1.23753	-1.25872	0.918662	3.98758	1.43449
	204.5	0.27442	0.689364	7.11955	1.18757	-1.33338	0.911937	4.45102	1.32344
	205	0.151037	0.692369	6.97795	1.24053	-1.47016	0.99649	4.55284	1.48
	205.5	0.205878	0.680977	6.84651	1.1765	-1.83082	0.994765	4.85054	1.60318
	206	0.162381	0.708461	6.65794	1.12549	-1.52892	1.02156	4.71281	1.54647
	206.5	0.184468	0.705437	6.84765	1.03118	-1.72758	0.954126	5.00941	1.5552
	207	-0.21784	0.69078	6.97335	1.02374	-1.55699	0.967859	4.86464	1.50918
	207.5	-0.355078	0.676479	6.80364	0.965357	-1.54844	0.956055	4.71743	1.64154
	208	-0.331282	0.770102	7.1776	0.965832	-1.35353	0.977795	4.89906	1.58693
	208.5	-0.274404	0.827042	7.33909	1.04142	-1.23938	0.956411	5.23579	1.62357
	209	-0.187992	0.871687	7.36715	1.09049	-1.33345	0.963543	4.90408	1.5151
	209.5	0.0335275	0.802821	7.24713	1.08549	-1.13693	0.978674	4.78599	1.38364
	210	0.306389	0.722814	7.10778	1.10552	-1.18677	1.03559	4.70243	1.31106
	210.5	0.0297019	0.752337	7.12831	1.09416	-1.27689	1.04336	4.87763	1.30856
	211	-0.0210781	0.666091	6.99996	1.05689	-1.2776	1.01131	4.71948	1.30604
	211.5	0.0136542	0.571129	6.63177	1.07774	-1.32955	1.02954	4.31848	1.29082
	212	-0.292974	0.696512	6.90708	1.16818	-1.27421	0.988081	4.34958	1.47385
	212.5	-0.310947	0.762989	7.06189	1.00546	-1.0099	0.904662	4.74253	1.58228
	213	-0.099937	0.815928	6.7437	1.0111	-0.841515	0.940124	4.4861	1.54687
	213.5	0.0151055	0.773227	6.90098	1.16671	-0.74199	0.964916	4.90209	1.42851
	214	0.0463289	0.816256	6.53769	1.04791	-0.574116	0.929707	4.69854	1.39988
	214.5	0.262905	0.742598	6.59734	0.918579	-0.793391	1.01733	4.59672	1.21304
	215	0.291491	0.744556	6.3827	1.04185	-0.810392	1.06781	4.21634	1.44539
	215.5	0.288576	0.684271	6.55204	1.11261	-1.42683	1.00033	4.71719	1.58346
	216	0.238575	0.687481	6.72743	1.00689	-1.16706	1.0038	5.38868	1.77383
	216.5	0.142316	0.626276	6.65689	1.04876	-1.27334	1.03672	5.04487	1.70124
	217	0.126523	0.655695	6.92448	1.10558	-1.02271	0.970602	4.9242	1.53723
	217.5	0.211118	0.746983	6.97919	1.14224	-0.93682	0.95728	5.00915	1.30239
	218	0.225403	0.742692	7.06624	1.12516	-0.794979	0.94641	4.18431	1.28628
	218.5	0.258218	0.72274	7.09353	1.07395	-0.756792	0.952123	3.82244	1.1958
	219	0.438521	0.687409	7.06908	1.1239	-0.930015	1.03037	3.824	1.20408
	219.5	0.266237	0.691565	6.91626	1.11702	-1.02021	1.10223	4.20682	1.36506
	220	0.277089	0.696747	7.01438	1.12809	-0.88335	1.09773	4.29852	1.37298
	220.5	-0.0975695	0.747345	6.98662	1.16621	-0.653708	1.06378	4.76775	1.50041
	221	-0.336765	0.68043	6.47104	1.23441	-0.81401	1.04581	4.785	1.68122
	221.5	-0.0658221	0.766582	7.05304	1.09335	-1.0859	1.04462	4.91885	1.69921
	222	-0.0915114	0.759338	7.26738	1.06035	-1.28567	0.994181	4.90967	1.71092
	222.5	-0.259661	0.792669	7.21217	1.11727	-1.5717	1.01139	4.89669	1.64062
	223	-0.105376	0.743269	7.11645	1.08689	-1.69243	0.992979	4.69745	1.33949
	223.5	0.128509	0.806153	6.92416	0.969443	-1.39718	0.933147	4.67671	1.26981
	224	0.437206	0.971405	6.87722	1.13019	-1.25868	0.997075	4.56874	1.37111
	224.5	0.136482	0.845069	6.72647	1.28216	-1.20788	1.00429	5.13968	1.41538
	225	0.235893	0.911311	6.85996	1.31382	-1.13319	0.969176	5.20514	1.48434
	225.5	0.140435	0.804907	6.81686	1.13262	-1.15932	1.02248	5.05298	1.60998
	226	0.270686	0.822525	7.32844	1.281	-1.44866	1.0531	5.43341	1.39717
	226.5	0.188687	0.803743	7.64075	1.19463	-1.34382	1.06892	4.95149	1.43065
	227	0.140127	0.818559	7.69137	1.04557	-1.37009	1.13721	4.78813	1.44522
	227.5	0.0796828	0.659042	7.77061	1.03766	-0.745169	1.07157	4.60766	1.3181
	228	0.396815	0.795567	7.74884	1.11092	-0.485153	0.980557	4.83052	1.32495
	228.5	0.22348	0.743179	7.61747	1.12732	-0.491451	0.985374	4.857	1.33877
	229	-0.353354	0.712228	7.34712	1.13938	-0.804898	1.0128	4.72957	1.25229
	229.5	-0.202685	0.687428	7.12892	1.11908	-0.985827	0.946157	4.59303	1.32469
	230	-0.108539	0.689234	6.91388	1.03063	-0.864545	1.00462	4.70175	1.32166
	230.5	-0.472618	0.711417	6.74382	1.00087	-1.16447	0.990619	4.7508	1.21272
	231	-0.356962	0.674833	6.56318	1.08598	-1.36485	0.987972	4.68	1.30635
	231.5	-0.320511	0.622131	6.49498	1.12621	-1.16797	0.975681	4.56349	1.1934
	232	-0.708299	0.705559	6.56939	1.1474	-1.33341	1.01048	4.53157	1.30532
	232.5	-0.662949	0.658294	6.59948	1.32948	-1.20417	1.05377	4.59537	1.33518
	233	-0.631429	0.712011	6.74749	1.3895	-1.24741	0.995984	4.95305	1.51868
	233.5	-0.557748	0.724697	6.71535	1.44042	-1.33862	1.00218	5.28077	1.53185
	234	-0.569961	0.759877	6.76801	1.43027	-1.05983	0.997316	5.71724	1.60837
	234.5	-0.625139	0.74819	6.58898	1.4233	-0.741667	0.959785	5.59233	1.53057
	235	-0.735452	0.76806	6.46771	1.38931	-1.09299	1.02319	5.21789	1.47687
	235.5	-0.494972	0.777145	6.56821	1.42589	-1.19951	1.00624	4.95225	1.54998
	236	-0.824791	0.808698	6.56861	1.31146	-0.977729	1.01384	4.71581	1.52631
	236.5	-0.744922	0.77526	6.25902	1.24439	-0.911654	0.928127	4.49428	1.54951
	237	-0.630953	0.84428	5.73086	1.34222	-0.930906	0.96221	4.21049	1.54728
	237.5	-0.651877	0.962164	6.06939	1.42619	-1.21712	1.01273	3.61452	1.17072
	238	-0.999258	0.93804	5.57173	1.22988	-1.40108	1.01862	2.93698	1.1576
	238.5	-1.05965	0.85818	5.28939	1.36879	-1.27113	0.969145	3.24221	1.27218
	239	-1.0164	0.765809	5.12789	1.18559	-1.53749	1.0306	2.95936	1.13553
	239.5	-1.22438	0.632832	5.28969	1.14296	-1.70551	1.00974	2.88636	0.982733
	240	-1.62826	0.565478	5.15585	1.15752	-1.6157	0.949358	3.0206	1.0481
	240.5	-1.52297	0.484393	5.68056	1.12012	-1.28653	1.09985	3.86269	0.951057
	241	-1.72027	0.571598	5.91381	1.17221	-0.481533	1.1283	4.51374	0.810138
	241.5	-1.81721	0.562016	6.68999	1.24423	0.136723	1.17643	5.19184	1.17614
	242	-1.82212	0.745913	7.56455	1.58439	-0.0127064	1.16187	5.18251	1.23609
	242.5	-1.18636	0.705035	8.16738	1.59014	-0.0513615	1.16113	5.77844	1.3261
	243	-1.11944	0.905924	9.49487	1.91199	0.126842	1.13471	6.17517	0.983185
	243.5	-0.693011	0.871076	10.4205	2.0179	0.315379	1.14523	5.99695	1.03288
	244	-0.111769	0.883662	10.8744	1.97915	0.462049	1.15182	5.77283	1.05418
	244.5	0.245082	1.01726	11.1604	1.86235	0.826706	1.19443	6.22266	0.950453
	245	0.193377	0.99463	11.63	1.97205	1.46407	1.06341	6.6872	1.4089
	245.5	0.20473	0.897075	11.6795	1.90439	2.03856	1.08099	6.69074	1.33257
	246	0.0665374	0.862527	11.8081	1.8371	2.48353	0.97596	6.66631	1.22515
	246.5	0.108317	0.811083	11.9113	1.86376	3.04435	1.07613	7.07009	1.06158
	247	0.309551	0.754237	12.2202	1.77418	3.11312	1.03755	6.94911	1.01762
	247.5	0.604759	0.743694	12.2667	1.78209	3.58863	0.978631	7.45321	1.1141
	248	1.23904	0.834025	12.5052	1.70438	3.52058	0.961638	7.7835	1.06668
	248.5	1.77282	0.895786	12.5889	1.66628	4.12642	1.02684	8.83004	1.46509
	249	1.96898	0.899754	13.1632	1.60179	4.30327	1.03269	9.36368	1.53176
	249.5	2.04518	0.903596	12.9572	1.5146	4.73591	1.02103	9.39333	1.57322
	250	2.05526	0.933892	13.5189	1.80681	5.44743	1.14991	9.52036	1.53721
	250.5	2.14641	0.954976	13.5689	1.84271	5.33831	1.06063	9.94619	1.50584
	251	2.42464	1.0125	13.8265	1.91992	5.63287	1.02733	9.58511	1.64801
	251.5	2.72256	1.08535	14.0386	1.92315	6.04419	1.16069	9.7767	1.67617
	252	3.04628	1.08949	13.9376	1.80164	6.20487	1.14434	10.562	1.44612
	252.5	3.3054	1.15384	14.3529	1.79402	6.42017	1.18935	10.9599	1.51819
	253	3.85382	1.05311	14.8873	1.72019	6.38622	1.15846	11.0553	1.46233
	253.5	4.1227	1.17143	15.2997	1.66997	6.76904	1.13639	11.4944	1.46526
	254	4.68729	1.15609	15.1797	1.76873	6.60026	1.11778	10.7747	1.19481
	254.5	4.93792	1.12469	15.1871	1.71744	6.9018	1.07113	11.028	1.21941
	255	5.17858	1.07286	15.3379	1.77367	7.48525	0.901421	11.7098	1.42525
	255.5	5.44744	1.17777	15.5256	1.64815	7.43627	0.822449	11.9639	1.42273
	256	5.70022	1.17376	15.7707	1.77497	7.40339	0.949576	11.9638	1.37789
	256.5	6.09722	1.25103	15.6849	1.78303	7.97569	0.850964	12.2339	1.46012
	257	6.7028	1.26302	15.818	1.86987	8.25599	0.930963	11.8975	1.53497
	257.5	6.86462	1.26291	15.8091	1.7556	8.29339	1.0268	12.0473	1.34705
	258	7.40799	1.24605	16.0149	1.73977	8.3239	1.06871	11.9735	1.38022
	258.5	7.87039	1.22365	16.256	1.59622	8.24294	0.993673	12.057	1.39112
	259	7.83385	1.2659	16.2415	1.59333	8.53757	0.986028	12.2069	1.43245
	259.5	8.09802	1.31459	16.4199	1.59861	9.12527	0.873901	12.6387	1.4334
	260	8.55057	1.21364	16.594	1.50247	9.19201	0.914842	12.7287	1.48833
	260.5	8.87795	1.19354	16.9501	1.65069	9.27898	0.882564	12.9179	1.51785
	261	9.58012	1.35409	17.0541	1.68957	9.36953	0.905121	13.0288	1.60605
	261.5	9.85072	1.32825	16.9321	1.65761	9.34316	0.904454	12.955	1.67876
	262	9.93411	1.28676	16.9568	1.63933	9.2387	0.874326	12.797	1.58169
	262.5	10.3362	1.27906	16.9373	1.57481	9.48336	0.983588	12.4277	1.4338
	263	10.9056	1.33037	17.0511	1.5818	9.42921	0.979054	12.647	1.45989
	263.5	11.1669	1.2029	17.0234	1.56116	9.72863	1.14537	12.3684	1.33224
	264	10.8382	1.10985	17.4528	1.54521	10.3533	0.930832	12.2917	1.2872
	264.5	10.9333	1.0954	17.4429	1.5288	10.743	0.844973	12.629	1.24
	265	11.0906	1.21836	17.242	1.5128	11.1692	0.761195	13.009	1.38211
	265.5	11.1917	1.23104	17.4248	1.4972	11.3474	0.708732	13.1668	1.35584
	266	11.3356	1.17995	17.2304	1.503	11.3435	0.729402	13.1793	1.3742
	266.5	11.533	1.21863	17.2573	1.49627	11.2091	0.702973	13.6687	1.52301
	267	11.7081	1.29685	17.4841	1.58213	11.1221	0.639941	13.6033	1.39127
	267.5	12.1238	1.29931	17.4832	1.68776	10.9663	0.71986	13.6272	1.2893
	268	11.9893	1.26885	17.1697	1.78847	11.4542	0.819641	13.6574	1.3457
	268.5	12.0139	1.29895	17.386	1.82881	11.7323	0.728479	13.6269	1.19454
	269	12.2241	1.30718	17.54	1.68645	11.6492	0.799516	13.5025	1.32264
	269.5	12.3565	1.25902	17.4325	1.70821	11.4597	0.776625	13.8345	1.41863
	270	12.367	1.23684	17.4156	1.68209	11.7698	0.792626	13.9479	1.35289
	270.5	12.4553	1.24389	17.3902	1.63046	11.4722	0.885299	13.8091	1.45183
	271	12.6603	1.17685	17.4685	1.64095	11.5594	0.937333	13.7082	1.45549
	271.5	12.9263	1.21612	17.6121	1.72553	11.8907	0.85408	14.005	1.44679
	272	13.2062	1.16034	18.0393	1.64884	12.1719	0.910934	13.6922	1.42318
	272.5	12.858	1.12166	18.3503	1.65736	12.009	0.920149	13.9677	1.49157
	273	12.7205	1.18622	18.4316	1.71112	12.4823	0.872144	13.9289	1.40516
	273.5	12.8954	1.29742	18.5728	1.63647	12.7535	0.894671	14.0472	1.28603
	274	12.8136	1.32328	18.3373	1.62143	12.6171	0.856849	13.6869	1.28213
	274.5	12.8845	1.50434	18.2517	1.58839	12.2813	0.845715	13.8471	1.33149
	275	13.0885	1.55159	18.0292	1.65208	12.5934	0.828048	13.7215	1.30746
	275.5	13.1094	1.50982	18.2388	1.69572	12.3336	0.784577	13.6613	1.28035
	276	13.3986	1.37052	18.1036	1.61249	12.5693	0.669288	13.588	1.26786
	276.5	13.2225	1.32373	18.2779	1.63865	12.5243	0.689617	13.4179	1.41632
	277	13.1111	1.29482	18.172	1.57884	12.4233	0.74608	13.5626	1.47893
	277.5	13.1916	1.22703	18.782	1.51051	12.0731	0.7732	13.8937	1.36593
	278	13.3991	1.28558	18.4977	1.58683	12.3292	0.818394	13.7094	1.3279
	278.5	13.2001	1.22375	18.4147	1.5903	12.257	0.941402	13.3351	1.31506
	279	13.2619	1.3312	18.7069	1.54141	12.813	0.987501	13.7803	1.25185
	279.5	13.3932	1.35144	18.8904	1.52344	12.9082	0.978642	13.826	1.18567
	280	13.7195	1.36985	19.1492	1.73709	12.745	1.00799	13.6314	1.00417
	280.5	13.724	1.36072	18.9466	1.78744	12.6641	1.00385	13.7202	1.20191
	281	13.6234	1.39505	18.8228	1.7347	13.0153	0.90658	14.1281	1.04845
	281.5	13.4777	1.2637	18.3354	1.48322	12.6841	0.878092	13.9645	1.30883
	282	13.4016	1.26674	18.6061	1.5905	12.3723	0.823012	13.9914	1.44857
	282.5	12.9164	1.20146	18.4707	1.56268	12.1652	0.771916	13.9814	1.53396
	283	12.8697	1.16224	18.3817	1.44808	12.2292	0.817058	13.6031	1.56795
	283.5	13.1946	1.27147	18.6432	1.58818	12.488	0.83943	13.5902	1.47775
	284	13.5805	1.28094	18.6621	1.54221	12.6915	0.83877	13.5481	1.35878
	284.5	13.4392	1.32859	18.4502	1.5537	12.7655	0.808294	13.8911	1.42281
	285	13.3364	1.23929	18.1193	1.53062	13.0825	0.715289	13.7486	1.3288
	285.5	13.5468	1.32174	18.4435	1.6388	12.9506	0.741336	13.6853	1.3949
	286	13.6094	1.29793	18.7792	1.73334	13.2175	0.760862	14.1437	1.48045
	286.5	13.4052	1.28163	18.6832	1.72697	13.4382	0.782513	13.9801	1.51428
	287	13.623	1.24261	18.665	1.71592	13.7231	0.83391	13.5068	1.48027
	287.5	13.6155	1.28845	18.7668	1.65765	13.8042	0.8123	13.9563	1.47838
	288	13.5318	1.31058	18.8121	1.67499	13.8757	0.846727	14.1457	1.24407
	288.5	13.4046	1.34733	18.6621	1.70282	13.2615	1.02531	14.3716	1.28831
	289	13.5706	1.34939	18.743	1.74685	13.768	0.816861	14.2778	1.27783
	289.5	13.5747	1.41781	18.8477	1.62203	13.6949	0.863315	13.7075	1.34122
	290	14.0114	1.41563	18.8294	1.65364	13.5075	0.86356	13.7875	1.24737
	290.5	13.9837	1.43143	18.3291	1.52865	13.8655	0.927373	13.8883	1.46541
	291	13.7817	1.46743	18.1645	1.52555	13.6652	0.93448	13.6886	1.44506
	291.5	13.708	1.43604	18.5746	1.557	13.8752	0.930561	13.3383	1.41866
	292	13.6809	1.40707	18.4683	1.6846	13.8544	0.935904	13.6244	1.57366
	292.5	13.3757	1.4151	18.7122	1.71392	13.7898	0.965719	13.5374	1.54712
	293	13.4761	1.4538	18.7538	1.6233	13.9668	0.905299	13.7532	1.44182
	293.5	13.9651	1.44164	19.1484	1.78056	13.8402	0.931906	13.7068	1.33444
	294	14.0429	1.41336	19.0386	1.70235	13.7111	0.892612	13.7787	1.40714
	294.5	13.865	1.40777	19.6103	1.7007	13.4554	0.977459	13.8458	1.4307
	295	14.242	1.43546	19.3992	1.3936	13.3801	0.869818	14.0169	1.34104
	295.5	14.0778	1.47319	19.8253	1.684	13.1028	1.06086	13.8815	1.35094
	296	14.1051	1.45937	19.8418	1.71524	12.8169	0.915832	13.9096	1.41022
	296.5	14.2882	1.46505	19.4808	1.61949	12.9587	0.944269	13.9526	1.36658
	297	14.2287	1.60728	19.1576	1.68839	13.3696	0.935407	13.8873	1.36772
	297.5	14.2649	1.63999	19.2975	1.77122	13.2025	0.924541	13.9406	1.36972
	298	14.3733	1.52292	19.5322	1.82824	13.1593	0.872605	14.3706	1.38077
	298.5	14.9775	1.53558	19.197	1.78745	13.4152	0.918206	14.7151	1.39652
	299	15.0101	1.56683	19.4164	1.79879	13.7688	1.01419	14.8564	1.45842
	299.5	15.1544	1.61336	19.3625	1.84565	13.3586	0.974013	14.4162	1.46859
	300	15.0016	1.59607	19.3679	1.83977	13.8135	0.982781	14.5005	1.39529
	300.5	14.8371	1.57024	19.2906	1.80558	13.9599	1.00264	14.2963	1.39966
	301	14.6231	1.56724	19.663	1.84727	13.843	1.09203	14.3594	1.3069
	301.5	14.6064	1.5209	19.3591	1.79327	13.4964	1.07788	14.1994	1.25903
	302	14.5201	1.37949	19.1789	1.84974	13.7681	1.06837	14.4875	1.0976
	302.5	14.454	1.4662	19.39	1.77474	14.0372	1.05787	14.4021	1.06415
	303	14.5666	1.47482	18.9538	1.57482	14.1968	1.02383	14.3236	1.03138
	303.5	14.768	1.44511	19.3347	1.54152	14.2616	1.00702	14.4035	1.0732
	304	14.8206	1.47557	19.723	1.72298	14.4459	0.915991	14.7372	0.990541
	304.5	14.5014	1.54949	19.8235	1.7829	14.6294	0.931001	14.5835	0.929083
	305	14.9926	1.4559	20.0333	1.88208	14.4926	1.01517	14.4478	1.14795
	305.5	14.9126	1.45589	20.1044	1.82553	14.2234	1.07186	14.3135	1.17808
	306	14.7798	1.50973	19.741	1.84745	13.9037	1.01732	14.2459	1.11257
	306.5	14.6288	1.54341	20.0467	1.77006	13.8315	1.0698	14.307	1.17623
	307	14.9033	1.35704	19.886	1.73695	14.1045	1.14169	13.9961	1.29425
	307.5	14.7661	1.3584	19.6897	1.84891	14.2599	1.1988	14.5048	1.31996
	308	14.8523	1.35337	19.2785	1.82481	14.5	1.155	14.5509	1.29322
	308.5	15.2617	1.39283	20.124	1.73228	14.6749	1.22301	14.7002	1.37067
	309	15.4615	1.47136	19.4806	1.68925	14.8586	1.20432	14.1177	1.20217
	309.5	15.4825	1.45729	19.8616	1.71974	15.0655	1.18721	14.3219	1.20744
	310	15.6473	1.4299	19.7793	1.69021	14.5606	1.20903	14.3459	1.29772
	310.5	15.63	1.47887	20.0057	1.77866	14.2619	1.16031	14.4818	1.46813
	311	15.2608	1.51545	19.7632	1.73492	14.489	1.10624	14.1657	1.33591
	311.5	15.4038	1.41696	20.0282	1.92468	14.4162	0.984998	14.4221	1.44769
	312	15.5077	1.43715	19.7751	1.94669	14.0398	1.08002	14.2341	1.44325
	312.5	15.4581	1.45536	19.9838	1.96053	14.399	1.0996	14.1851	1.50349
	313	15.5249	1.47872	20.0674	1.93345	14.8035	1.10535	13.9564	1.43813
	313.5	15.265	1.44995	20.036	1.91732	14.6797	1.16145	14.4341	1.54028
	314	15.1898	1.47581	19.9586	1.75767	14.9233	1.21339	14.278	1.52455
	314.5	15.3219	1.48653	20.017	1.58449	15.3157	1.22625	14.7288	1.41989
	315	15.4568	1.49703	20.1095	1.47454	15.3966	1.26178	14.7841	1.2933
	315.5	15.3759	1.64925	20.2315	1.44504	15.4613	1.28732	14.7046	1.27646
	316	15.7877	1.60763	20.3772	1.56596	15.3138	1.37891	14.4884	1.1977
	316.5	15.8764	1.74101	20.445	1.50682	14.7141	1.38598	14.4991	1.29659
	317	15.7145	1.63518	20.4429	1.61283	14.8902	1.23754	13.7492	1.32911
	317.5	15.546	1.58313	20.6283	1.68328	14.5039	1.20649	13.9976	1.35408
	318	15.4946	1.54878	20.33	1.6876	14.497	1.26302	14.1409	1.38186
	318.5	15.3418	1.42156	20.3692	1.6991	14.3559	1.24424	14.6184	1.42623
	319	15.7923	1.45185	20.4495	1.69015	14.6368	1.30335	15.0704	1.29796
	319.5	15.9897	1.60062	20.324	1.73552	14.6528	1.28853	14.7879	1.33534
	320	15.3981	1.44373	20.6376	1.70605	14.2086	1.35567	14.5812	1.33928
	320.5	15.3072	1.428	20.4828	1.83676	14.4457	1.28307	14.6372	1.27984
	321	15.7136	1.53481	20.4619	1.81963	14.274	1.12031	15.0669	1.28893
	321.5	16.0091	1.62225	20.7115	1.78175	14.6406	1.31291	14.5676	1.24647
	322	16.1567	1.57021	20.7112	1.79525	14.6634	1.32349	14.9175	1.25666
	322.5	16.5948	1.44431	20.668	1.84274	14.9429	1.28158	15.5565	1.09343
	323	16.8977	1.42518	21.041	1.74793	15.053	1.29061	15.2473	1.20144
	323.5	16.3408	1.3201	21.0368	1.83694	14.6799	1.30145	14.6572	1.39287
	324	16.4814	1.39177	20.5261	1.97387	14.6489	1.32952	14.5693	1.50725
	324.5	16.3995	1.46437	20.427	1.99727	14.7626	1.36009	14.9588	1.43988
	325	16.4997	1.45513	20.305	1.86424	14.5298	1.33235	14.9655	1.5152
	325.5	16.3776	1.47981	20.0888	1.90424	14.4397	1.34938	14.6513	1.55461
	326	16.285	1.4289	19.9914	1.88646	14.4443	1.32911	14.7156	1.36848
	326.5	16.1995	1.34825	20.0017	1.90975	14.6068	1.25534	14.8084	1.32404
	327	16.1253	1.32795	19.8254	1.93772	14.4443	1.2563	14.6143	1.2953
	327.5	16.3658	1.48804	19.9346	1.91781	14.8429	1.35606	14.7369	1.35221
	328	16.1515	1.47562	20.1938	1.88214	15.0285	1.46035	14.6621	1.33651
	328.5	16.1268	1.56555	20.2244	1.95497	14.8976	1.44968	14.6329	1.3099
	329	16.3671	1.5424	20.6093	1.89354	14.5049	1.48963	14.9061	1.44604
	329.5	16.1366	1.47302	20.7142	1.82486	14.6118	1.4201	15.0259	1.5326
	330	16.1344	1.42981	21.0247	1.88293	14.8562	1.43342	14.9447	1.44193
	330.5	16.0138	1.45987	20.5559	1.71502	14.4869	1.39053	15.5172	1.6045
	331	16.1935	1.43805	20.6461	1.83654	14.4923	1.43122	15.3892	1.52164
	331.5	16.254	1.46107	20.7089	1.77621	15.0416	1.41777	15.2732	1.432
	332	16.2664	1.50191	20.378	1.71756	15.063	1.39321	15.2809	1.44985
	332.5	16.3513	1.58828	20.2302	1.72319	15.0016	1.41052	15.0287	1.5301
	333	16.2863	1.53399	20.6728	1.80326	15.1254	1.40106	15.4171	1.33696
	333.5	16.2068	1.52037	20.8969	1.69954	15.1476	1.35196	15.2713	1.19918
	334	16.2024	1.58425	20.2218	1.80866	14.9082	1.31158	15.1854	1.16969
	334.5	16.5261	1.59852	20.6129	1.67311	15.2734	1.40724	15.14	1.16097
	335	16.4283	1.59843	20.6648	1.78326	15.3316	1.43835	15.2329	1.20853
	335.5	16.4435	1.6026	20.6954	1.7909	15.2977	1.42003	14.9551	1.27868
	336	16.4091	1.65201	20.7828	1.77658	15.403	1.50873	14.6211	1.24525
	336.5	16.0774	1.60848	20.7605	1.73875	15.5851	1.58797	14.6755	1.40569
	337	16.0362	1.55726	20.9273	1.79691	15.3218	1.55556	14.4867	1.34189
	337.5	16.2339	1.53332	21.0149	1.75879	15.2952	1.53888	14.5739	1.36957
	338	15.8434	1.43305	20.5487	1.77149	15.1722	1.58221	14.2738	1.47657
	338.5	16.3108	1.42431	20.6514	1.71824	14.976	1.53054	14.4826	1.51293
	339	16.5979	1.46257	21.3676	1.87535	15.0295	1.50587	14.525	1.28439
	339.5	16.6592	1.43367	21.3458	1.88019	14.9754	1.44529	14.5526	1.23999
	340	16.3319	1.33015	21.1417	1.84446	15.3837	1.37312	14.6309	1.27329
	340.5	16.6995	1.44242	21.3867	1.86066	15.513	1.3214	14.5522	1.33821
	341	16.8005	1.57127	21.4924	1.87654	15.6735	1.27002	14.7157	1.29431
	341.5	16.4826	1.48677	21.2124	1.73632	15.9446	1.4587	14.5037	1.23203
	342	16.418	1.52655	21	1.73155	16.0591	1.47057	14.7623	1.2138
	342.5	16.7896	1.57953	20.9298	1.76096	15.3583	1.35057	14.9644	1.1904
	343	16.8147	1.51088	20.7918	1.78585	15.4715	1.48864	15.0698	1.28626
	343.5	16.7812	1.51438	20.4332	1.79957	15.2103	1.39102	15.0939	1.29752
	344	16.7505	1.60524	20.5228	1.88195	15.2336	1.44759	15.2502	1.36213
	344.5	16.8375	1.63684	20.3736	1.85968	15.2225	1.45756	15.3908	1.36434
	345	16.6902	1.62831	20.3119	1.73711	15.1887	1.48765	15.4066	1.40616
	345.5	16.4824	1.47289	20.579	1.7705	15.1014	1.42531	14.9875	1.42839
	346	16.402	1.4547	20.9958	1.68132	15.052	1.43995	15.0983	1.52508
	346.5	16.2466	1.28453	21.1748	1.65392	14.5931	1.46605	15.304	1.37453
	347	16.6662	1.44748	21.2257	1.69971	14.7953	1.48362	14.8708	1.26003
	347.5	16.9911	1.35015	21.0921	1.90693	15.0968	1.52445	15.0373	1.30473
	348	17.2832	1.49802	20.9774	1.83287	15.1062	1.56309	15.2054	1.30256
	348.5	17.2362	1.44685	20.6677	1.84866	15.1514	1.53518	15.3478	1.16216
	349	17.1641	1.53024	20.8779	1.81239	15.3853	1.43798	15.2402	1.24674
	349.5	16.9888	1.57427	20.6185	1.79832	15.5784	1.56512	14.816	1.27453
	350	17.0195	1.59707	20.5473	1.75506	15.494	1.46657	14.328	1.20307
	350.5	16.8656	1.57095	20.278	1.68369	15.6597	1.4899	15.0973	1.07838
	351	17.0626	1.58901	20.6826	1.78541	15.3997	1.44169	15.1349	1.32879
	351.5	17.2245	1.54579	20.4304	1.76523	15.0786	1.42983	15.3277	1.2438
	352	17.4657	1.59363	20.6249	1.80015	15.246	1.49812	15.1021	1.2686
	352.5	17.6392	1.61017	20.5668	1.75328	15.2322	1.44895	15.2448	1.24511
	353	17.4643	1.55548	20.6374	1.76238	15.0819	1.49399	15.3707	1.37879
	353.5	17.1556	1.45027	20.5813	1.77418	15.1567	1.59448	15.6909	1.35882
	354	17.0664	1.46312	20.5189	1.83026	15.2619	1.58153	15.6686	1.27929
	354.5	16.7787	1.64479	20.5278	1.85861	15.2299	1.50976	15.9829	1.30137
	355	16.4566	1.56367	20.1678	1.96941	15.4232	1.49785	15.7713	1.32327
	355.5	16.5914	1.60154	20.4586	1.97921	15.2186	1.56073	15.412	1.34419
	356	16.7741	1.45812	20.8469	1.91832	15.2819	1.62097	15.2543	1.18791
	356.5	16.6276	1.58247	20.8126	2.03483	15.4372	1.638	15.1921	1.29451
	357	16.6724	1.55686	20.8459	2.03506	15.0382	1.67806	14.9994	1.28812
	357.5	16.9961	1.55577	20.7436	1.94558	15.0546	1.5855	15.0804	1.3958
	358	17.1394	1.60964	21.1246	1.92626	15.187	1.61613	15.2809	1.49187
	358.5	17.3391	1.77352	21.0792	1.95802	15.2192	1.59726	15.3023	1.37476
	359	17.2092	1.71075	20.7577	2.07929	15.2052	1.50855	15.4365	1.26139
	359.5	17.2063	1.71125	20.9173	2.09358	14.7115	1.4632	15.1066	1.44361
	360	17.0734	1.70672	20.9743	2.09048	14.725	1.43465	16.1427	1.18223
	360.5	17.2029	1.84156	20.8375	1.95869	15.1274	1.45022	16.803	1.18456
	361	16.7509	1.62957	20.3331	1.98973	15.3347	1.51216	16.408	1.23283
	361.5	16.6509	1.5724	20.8714	2.0674	15.3974	1.50744	15.9711	1.22046
	362	16.6994	1.56815	20.84	2.04064	15.5259	1.56262	15.8465	1.21202
	362.5	17.3095	1.6699	20.5614	1.84293	14.9794	1.61015	15.491	1.29209
	363	17.0623	1.63527	20.4321	1.89193	15.1067	1.6655	15.5156	1.24728
	363.5	17.3754	1.68151	20.5669	1.85163	14.9099	1.6366	15.3453	1.21915
	364	17.3709	1.73993	20.2201	1.79836	14.9761	1.55275	16.0303	1.35662
	364.5	17.0932	1.71975	20.2666	1.68413	14.6782	1.67657	15.8608	1.36159
	365	16.9511	1.75569	20.3015	1.693	14.9803	1.75735	15.5949	1.41845
	365.5	17.4676	1.7898	20.6299	1.85378	15.3061	1.86883	15.8352	1.55738
	366	17.5142	1.7581	20.7452	1.86592	15.1939	1.77363	16.0314	1.66436
	366.5	17.2754	1.74112	20.8457	1.71185	15.374	1.80792	15.676	1.72153
	367	17.5865	1.63372	20.5756	1.80049	15.5735	1.66116	15.595	1.68818
	367.5	17.7119	1.64917	20.8332	1.79612	15.6695	1.68353	16.1163	1.50934
	368	17.4492	1.52044	20.67	1.67931	15.5661	1.66358	16.5154	1.45434
	368.5	17.6726	1.59203	20.5208	1.73346	15.7342	1.5794	16.1613	1.31748
	369	17.8359	1.68914	20.5185	1.78612	15.6078	1.56942	16.0895	1.20597
	369.5	18.15	1.73441	20.9306	1.68769	15.9451	1.6138	15.7962	1.43314
	370	18.0418	1.69188	20.1359	1.82758	16.0075	1.59492	15.681	1.57662
	370.5	18.0116	1.8396	20.4584	1.69183	15.5597	1.49351	15.5149	1.49258
	371	17.5786	1.85829	20.8572	1.83557	15.9474	1.57137	15.5537	1.57861
	371.5	17.3253	1.7422	20.2252	1.86481	16.1506	1.62456	15.7682	1.53678
	372	16.7752	1.69322	20.3073	1.92331	15.4862	1.5964	16.0869	1.52386
	372.5	16.5868	1.65573	20.4093	1.92659	15.9642	1.6	16.0074	1.34768
	373	17.1851	1.46694	20.4808	1.86166	15.6251	1.67074	16.1277	1.50449
	373.5	17.4019	1.48641	20.7806	1.8651	15.371	1.55791	16.0051	1.37949
	374	17.5822	1.60897	20.4816	1.77972	15.4909	1.71744	15.3665	1.21483
	374.5	17.2805	1.51107	20.6159	1.75472	15.5963	1.55394	15.4098	1.2122
	375	17.4833	1.6663	20.533	1.89144	15.2854	1.52919	15.4796	1.1843
	375.5	17.7979	1.71095	20.9042	1.9051	15.6852	1.58017	15.5541	1.23863
	376	17.9309	1.80926	20.9376	2.02292	15.6926	1.59381	15.7977	1.37113
	376.5	18.0442	1.64257	20.4817	1.97106	15.6963	1.54738	15.7808	1.37299
	377	18.1422	1.66296	20.4886	1.98842	15.4499	1.6708	15.5273	1.27143
	377.5	18.4085	1.64608	20.7937	2.0887	15.5988	1.69854	15.8983	1.38584
	378	17.7705	1.53182	20.4458	1.97898	15.5056	1.7355	15.9628	1.20485
	378.5	17.8722	1.55095	20.3752	1.91164	15.675	1.65539	15.8851	1.34766
	379	17.6174	1.75175	20.9093	1.70198	16.0186	1.65027	15.9694	1.2805
	379.5	17.7616	1.90915	20.6018	1.85556	15.7343	1.6621	15.7575	1.28607
	380	17.8336	1.79714	21.0855	1.67251	15.9681	1.63073	15.3011	1.21002
	380.5	17.8242	1.89562	20.9138	1.81594	15.2525	1.55474	15.3079	1.13346
	381	17.8544	1.93359	20.9885	1.66412	15.4898	1.57322	15.8083	1.21913
	381.5	17.5648	1.78325	21.0318	1.84582	15.5655	1.51425	15.9457	1.27588
	382	17.8443	1.73952	20.7263	1.82036	15.2543	1.39715	15.7777	1.53608
	382.5	18.0803	1.75785	20.6598	1.77043	15.277	1.59964	16.2518	1.62275
	383	17.9447	1.73726	20.8118	1.84239	15.5729	1.61477	16.1511	1.60327
	383.5	18.0224	1.8648	20.5266	1.8862	15.4853	1.63771	15.8857	1.54788
	384	18.1074	1.81586	20.6303	1.8921	15.6891	1.62596	15.9436	1.53567
	384.5	18.1253	1.75175	20.8428	1.87402	15.7647	1.62638	15.939	1.45963
	385	17.8847	1.75987	21.1392	1.88674	16.152	1.53423	15.9815	1.28514
	385.5	17.9431	1.67801	21.3424	1.87278	16.1284	1.49864	16.0563	1.48567
	386	17.6614	1.70586	21.2736	1.69738	16.4883	1.36381	15.9272	1.537
	386.5	17.6133	1.62466	21.4453	1.71283	16.1996	1.45019	15.4619	1.63342
	387	17.7406	1.60234	21.146	1.77885	16.083	1.53061	15.4959	1.54094
	387.5	17.8828	1.68274	20.9464	1.74003	16.053	1.39233	15.7496	1.67798
	388	18.0517	1.81298	21.0276	1.81609	16.0027	1.43183	15.7499	1.58627
	388.5	18.1837	1.78652	21.313	1.77408	15.6798	1.58916	16.0649	1.53532
	389	18.2135	1.86249	21.2567	1.7526	16.0042	1.67936	16.0377	1.6066
	389.5	18.0205	1.84795	20.9064	1.69454	15.7462	1.608	15.9726	1.64089
	390	17.458	1.78813	21.0585	1.69725	16.2842	1.61501	16.2439	1.42392
	390.5	17.4953	1.74696	20.443	1.86709	15.8153	1.7949	16.0402	1.40204
	391	17.308	1.73313	20.2099	2.06714	15.5685	1.7824	15.8603	1.45009
	391.5	17.2493	1.67437	20.4723	2.03277	15.349	1.69861	15.8033	1.50237
	392	17.1091	1.70693	20.2732	2.02877	15.6589	1.72407	15.8689	1.40453
	392.5	17.5529	1.86114	20.3038	1.98664	15.5844	1.69311	15.9089	1.52112
	393	17.6467	1.88235	20.6046	1.89611	16.1662	1.62534	15.6589	1.52837
	393.5	17.8942	1.89494	20.8969	1.83013	16.0828	1.58624	15.9696	1.55921
	394	17.9293	1.89797	20.9351	1.74815	15.9764	1.59597	16.6901	1.51497
	394.5	18.5285	1.93361	21.4337	1.76632	16.0344	1.65631	16.3206	1.33028
	395	18.6931	2.11331	21.4218	1.76071	15.5746	1.61874	16.2251	1.2331
	395.5	18.7462	2.02524	21.1173	1.83043	15.6981	1.60585	16.7998	1.05809
	396	18.4455	1.86994	21.0814	1.82779	15.5489	1.62476	16.5667	1.12058
	396.5	17.6757	1.80964	20.6211	1.96608	15.7502	1.585	15.8331	1.3033
	397	17.5728	1.71832	20.9754	2.06953	15.6069	1.57228	16.0189	1.40633
	397.5	17.9229	1.8861	21.1639	2.08719	15.7101	1.55605	16.4507	1.54031
	398	17.5903	1.62469	21.3538	2.02048	15.6679	1.62459	16.7434	1.48753
	398.5	17.9909	1.78276	21.1315	2.0735	15.6782	1.71072	16.7948	1.26406
	399	18.5614	2.00802	21.4646	2.04345	15.9143	1.66552	16.8638	1.36995
	399.5	18.1189	1.89534	21.2223	1.8198	15.5276	1.64672	16.326	1.2454
	400	17.689	1.65624	20.5542	1.83751	15.8504	1.63778	16.0391	1.31679
	400.5	17.4658	1.73478	20.5532	1.89223	15.7541	1.76296	15.7249	1.56038
	401	17.0757	1.79225	20.6733	1.91752	16.0887	1.58248	15.4848	1.3374
	401.5	17.0364	1.78849	20.8852	1.69229	15.5015	1.68546	15.8514	1.31506
	402	17.0734	1.74618	21.1203	1.87417	15.4397	1.62548	16.0381	1.52308
	402.5	17.5705	1.69094	21.3069	1.93205	15.337	1.5816	15.9987	1.33497
	403	17.2711	1.84132	21.0301	1.97899	15.1768	1.45572	15.9573	1.3285
	403.5	18.5496	1.73826	21.0685	1.85295	15.5594	1.53521	16.0504	1.28022
	404	18.3172	1.81567	21.3674	1.78556	15.4359	1.55569	15.6478	1.36823
	404.5	17.9948	1.83081	20.7318	1.79672	15.8867	1.49516	15.3116	1.18967
	405	17.8685	1.7403	21.0298	1.69168	15.6883	1.55564	15.3938	1.25016
	405.5	18.0782	1.73578	20.4563	1.60682	16.0255	1.581	15.5649	1.217
	406	17.5344	1.68869	20.7335	1.71423	16.1304	1.59643	15.3313	1.30349
	406.5	17.4319	1.82159	20.7484	1.6763	16.2866	1.59217	15.4581	1.34338
	407	17.2395	1.86632	21.0973	1.6515	16.4934	1.60316	15.7598	1.36743
	407.5	17.1435	1.81797	21.091	1.70874	16.2158	1.58583	15.7922	1.37701
	408	17.4365	1.94281	21.3553	1.7636	16.241	1.62303	16.1514	1.28043
	408.5	18.0095	2.15605	20.8408	1.69223	15.8542	1.53645	16.4674	1.31933
	409	18.0652	2.13331	20.9334	1.7799	15.7639	1.52316	16.486	1.30415
	409.5	17.8858	2.06499	20.9991	1.7183	15.6171	1.57205	16.4352	1.21123
	410	18.3935	2.02206	21.0964	1.71298	15.7042	1.56425	16.1162	1.3078
	410.5	18.3454	1.95445	21.0421	1.84471	15.5848	1.49894	16.1857	1.41595
	411	17.9294	1.82509	21.4241	1.9227	15.3092	1.50772	15.6572	1.22179
	411.5	17.7587	1.64868	21.5168	1.95983	14.7532	1.5045	15.7473	1.3354
	412	18.1457	1.58463	21.534	2.00319	14.6203	1.57109	15.7746	1.35301
	412.5	18.5586	1.71286	21.063	2.00561	14.7228	1.53635	15.7336	1.58319
	413	18.1518	1.76188	21.2893	1.95924	14.8394	1.66547	15.4362	1.55337
	413.5	18.1282	1.75611	21.2999	1.92114	15.0353	1.55689	15.6636	1.52898
	414	18.3157	1.75451	21.3286	1.87811	15.0675	1.56709	15.8667	1.50973
	414.5	18.0907	1.73613	21.3493	1.83549	15.4352	1.54228	15.6846	1.55854
	415	18.1066	1.73345	21.4861	1.78644	15.3019	1.59104	15.3053	1.58305
	415.5	18.0265	1.72734	21.313	1.8061	16.0821	1.59515	15.6832	1.4594
	416	17.9279	1.68456	21.574	1.96403	15.7532	1.6349	15.08	1.589
	416.5	18.1554	1.67908	21.1341	1.76967	15.3989	1.66625	15.2611	1.55148
	417	18.183	1.66838	21.1744	1.70935	15.1881	1.61265	15.7131	1.61528
	417.5	18.4249	1.6613	21.3737	1.71548	15.5347	1.63538	15.8091	1.52751
	418	18.3354	1.71909	21.3183	1.89035	15.0236	1.63416	15.9339	1.44153
	418.5	18.6425	1.66637	21.2094	1.78821	15.0767	1.64295	16.1464	1.28288
	419	18.4583	1.74853	21.4893	1.94113	15.3384	1.53975	15.4472	1.12363
	419.5	18.3796	1.71686	21.3495	1.89448	14.8752	1.77577	15.2707	1.05992
	420	18.1531	1.73376	21.4926	1.8648	14.6281	1.73422	15.2976	1.05083
	420.5	18.2904	1.68329	21.5038	1.8673	15.0608	1.65105	14.7144	1.11925
	421	18.101	1.56777	20.7428	2.15221	15.4775	1.57086	14.8048	1.19736
	421.5	18.0322	1.59527	20.5431	1.90476	15.5881	1.65649	15.0505	1.22414
	422	18.396	1.62998	20.7002	1.88439	15.6747	1.561	15.3096	1.31251
	422.5	18.0303	1.77094	20.405	1.94651	15.7903	1.57184	15.4698	1.24287
	423	17.8048	1.80573	20.2062	1.94244	15.5493	1.65491	15.0532	1.22182
	423.5	18.271	1.92545	20.5846	1.98526	15.4253	1.70711	15.2551	1.19696
	424	18.2268	1.84579	20.3501	2.05087	15.448	1.66495	15.2931	1.17038
	424.5	18.4647	1.845	20.4648	2.04344	14.7066	1.71969	15.0619	1.30617
	425	18.4916	1.89799	20.6282	2.04346	14.8672	1.74816	14.6092	1.22212
	425.5	18.5466	1.98224	21.0378	1.86969	14.8333	1.73664	14.5032	1.18242
	426	18.2656	1.98863	21.3762	1.80071	14.771	1.66871	14.8231	1.33162
	426.5	18.2831	1.92682	21.3417	1.74645	14.8114	1.61309	14.9719	1.34393
	427	18.1289	1.87093	21.2857	1.77585	15.3892	1.66747	14.9562	1.34396
	427.5	18.3394	1.91556	20.9538	1.72728	15.6478	1.60206	15.315	1.33896
	428	18.3653	1.9211	21.241	1.70775	15.4678	1.5539	15.0741	1.16319
	428.5	18.3908	1.97734	21.1442	1.71347	15.3629	1.64831	14.8184	1.18885
	429	18.4741	1.91992	20.9398	1.73697	15.5594	1.7378	14.8429	1.22964
	429.5	18.5269	1.91829	20.9321	1.73038	15.8292	1.80891	14.3896	1.16622
	430	18.1325	1.91594	21.1678	1.74663	16.0912	1.80982	14.1253	1.25216
	430.5	18.1494	1.82508	20.9127	1.74472	15.5712	1.82328	14.4675	1.17148
	431	18.3321	1.73423	21.2188	1.93269	16.0095	1.82375	14.7443	1.22422
	431.5	18.2969	1.87437	20.9425	1.72943	15.605	1.77883	14.2811	1.17219
	432	18.3142	1.70225	20.885	1.74823	15.2326	1.74183	14.7763	1.22198
	432.5	18.6751	1.82803	20.7775	1.86482	15.0465	1.78151	15.0666	1.27882
	433	18.1853	1.84138	20.9379	1.97025	14.8551	1.81718	15.2755	1.27702
	433.5	17.8745	1.7355	21.2351	1.96888	14.8508	1.82586	15.5894	1.29405
	434	17.4955	1.58415	21.1886	2.0341	14.8677	1.84763	15.313	1.18204
	434.5	17.7683	1.70946	21.514	2.05803	14.9871	1.89099	15.6231	1.3403
	435	17.5394	1.72708	21.528	2.03006	15.1531	1.85536	15.9191	1.31739
	435.5	17.6835	1.7354	21.3783	1.93751	15.4094	1.70762	16.0096	1.34172
	436	17.6187	1.8192	21.3862	1.79869	15.3318	1.6757	15.5148	1.1794
	436.5	18.046	1.75098	21.2045	1.74927	15.8985	1.62224	15.4757	1.14778
	437	17.9781	1.76498	21.5218	1.63923	15.6977	1.62866	15.2879	1.32353
	437.5	18.2349	1.68568	21.1151	1.68144	15.8651	1.5961	14.692	1.24515
	438	18.2971	1.79565	20.9113	1.65542	15.4867	1.63071	14.7186	1.24826
	438.5	18.8014	1.91571	20.9649	1.80819	14.9938	1.73399	14.5144	1.25842
	439	18.4143	1.91729	21.0714	1.78581	15.2472	1.8514	14.1234	1.29337
	439.5	18.3212	1.95199	21.0194	1.92805	15.4901	1.81153	14.6252	0.98212
	440	18.3169	1.78358	21.0421	1.90136	15.7128	1.75262	14.2591	1.02113
	440.5	18.5384	1.88813	21.094	1.94698	15.6113	1.75648	14.382	0.970502
	441	18.7684	1.82381	21.2493	1.93521	15.761	1.67265	14.3137	0.972027
	441.5	18.9132	1.97014	21.0068	2.00693	15.7694	1.71094	14.2652	0.995128
	442	18.5284	1.8055	20.3352	1.94794	15.7453	1.72687	14.2949	0.995421
	442.5	18.6067	2.02299	20.6742	1.88304	15.9948	1.76969	14.4206	1.20873
	443	18.4091	2.04397	20.5622	1.90524	15.3996	1.6373	15.0611	1.10823
	443.5	18.3553	1.91069	20.408	1.83857	15.5679	1.60871	15.3824	1.12938
	444	18.0517	1.84726	20.5408	1.7925	15.3421	1.67459	15.6905	1.14287
	444.5	18.4347	2.09594	20.6687	1.75486	14.678	1.793	15.7474	1.18354
	445	17.6546	1.97578	21.0294	2.00018	14.5519	1.82029	15.4713	1.16881
	445.5	17.7938	1.88769	20.5677	1.90684	14.5464	1.77938	15.735	1.0823
	446	18.0464	2.08658	20.3561	1.91188	14.7392	1.79146	15.3486	1.04021
	446.5	18.0704	2.09286	20.8912	2.00243	15.0084	1.84533	15.2788	1.06848
	447	17.9551	2.04786	20.7781	1.93062	15.0647	1.75904	15.4685	1.33455
	447.5	18.0619	1.94519	20.8755	1.90047	15.0448	1.79726	15.2741	1.52625
	448	18.04	2.05928	21.1968	1.88943	14.8961	1.73068	14.9426	1.31716
	448.5	17.7403	2.01578	20.862	1.87013	15.1921	1.70022	14.7593	1.23571
	449	18.2112	2.14284	20.8579	1.90075	15.2296	1.78895	14.3337	1.56699
	449.5	17.7208	2.07195	21.1953	2.03731	15.3287	1.6535	14.0755	1.46105
	450	18.0242	2.16497	21.0107	1.86597	15.737	1.64698	14.1434	1.46073
	450.5	18.192	1.96585	20.6115	2.06313	15.2952	1.70245	14.3988	1.42522
	451	18.3312	1.70482	20.9854	2.19015	15.5375	1.72784	14.9599	1.39093
	451.5	18.3024	1.75941	21.0376	2.10455	15.0903	1.67234	14.9336	1.31481
	452	18.3978	1.8016	20.7092	2.09964	14.7985	1.73768	14.698	1.34707
	452.5	18.6511	1.81713	20.7776	2.08703	14.8622	1.73138	14.5119	1.35556
	453	18.9032	1.82866	21.2309	2.05107	15.0921	1.68091	14.8719	1.34905
	453.5	19.6387	2.16826	20.759	1.9387	15.2256	1.76493	15.4472	1.28363
	454	18.5978	1.87595	20.4502	1.92114	15.2479	1.70327	15.2639	1.23555
	454.5	19.1657	2.10713	20.7258	1.88375	15.1156	1.69266	15.6692	1.18422
	455	18.8379	2.0209	20.9326	1.89056	15.2761	1.70202	15.7549	1.09307
	455.5	18.9823	2.13999	21.113	1.88088	15.1697	1.7169	15.6031	1.18884
	456	18.6559	2.10211	21.1606	1.84786	14.8345	1.73764	15.3131	1.33533
	456.5	18.9795	2.06279	20.9394	1.89048	15.2689	1.75571	15.2033	1.42605
	457	18.8856	1.9738	21.0624	1.92775	15.2308	1.80001	15.2254	1.37756
	457.5	19.0273	2.08523	20.9626	1.93258	15.2319	1.78166	14.8066	1.45946
	458	18.9343	2.1664	20.5412	1.86676	15.061	1.6862	15.0812	1.35744
	458.5	18.7891	2.08299	20.4424	1.81	14.8695	1.8175	15.0788	1.29664
	459	18.8603	2.07479	20.472	1.7961	14.8232	1.65117	15.0749	1.20746
	459.5	18.8268	1.89329	20.6141	1.68212	14.7195	1.80833	14.833	1.16603
	460	18.8026	1.87315	20.8211	1.69634	15.2555	1.69585	15.3572	1.37728
	460.5	18.8587	1.9102	21.269	1.92626	14.2662	1.75625	15.2669	1.57074
	461	18.6366	1.81048	21.2977	1.9505	14.6703	1.77251	15.1418	1.66185
	461.5	18.3577	1.79852	21.0483	1.97071	14.7505	1.7846	15.2787	1.88754
	462	18.5511	1.78803	21.0662	2.02942	14.838	1.65373	15.0612	1.53067
	462.5	18.1911	1.80473	20.6857	1.98238	14.7907	1.62374	14.7325	1.74921
	463	18.2133	1.85278	20.6848	1.83378	14.9398	1.7613	14.7574	1.8077
	463.5	18.4808	1.93511	20.7758	1.78463	14.7743	1.69227	14.7189	1.88194
	464	18.2957	1.86548	20.8569	1.80481	15.0259	1.84732	14.2151	1.70957
	464.5	18.2248	1.96556	21.1111	1.77737	14.9959	1.84306	14.9012	1.69187
	465	18.7142	2.17139	21.2338	1.69009	14.8492	1.83598	15.1187	1.61346
	465.5	18.8033	2.21954	21.1892	1.77153	14.9437	1.85555	15.2391	1.60259
	466	19.1921	2.1188	21.0733	1.74712	14.8559	1.83119	15.4275	1.69222
	466.5	19.0123	2.12555	20.8498	1.7876	14.8052	1.76824	15.0966	1.43893
	467	19.1233	2.35681	20.3915	1.70797	14.9345	1.64868	15.4758	1.52748
	467.5	18.7571	2.14472	20.7539	1.86546	14.8464	1.54502	15.6451	1.49066
	468	18.5462	2.20186	20.7409	1.73048	14.9981	1.52675	15.4369	1.46796
	468.5	18.4328	2.3475	20.7972	1.77063	14.6438	1.51476	15.3577	1.43941
	469	18.8641	2.31591	21.1058	1.83365	15.0974	1.5704	15.9937	1.45816
	469.5	19.0652	2.24328	21.4144	1.86194	15.1908	1.65213	15.4895	1.24107
	470	19.0561	2.28155	21.0983	1.80068	15.0016	1.68652	15.1255	1.33907
	470.5	19.2376	2.14087	20.9347	1.83384	14.691	1.70282	15.0151	1.17342
	471	19.1681	2.06815	20.8786	1.85317	14.8682	1.67519	15.1059	1.30371
	471.5	19.2635	2.15982	20.9103	1.84039	14.6657	1.71174	14.6948	1.1046
	472	18.8831	2.14526	21.0772	1.82195	14.706	1.6513	15.1406	1.06981
	472.5	19.1007	2.24379	21.2666	1.80379	14.9561	1.63789	15.5879	1.28293
	473	18.4309	2.24854	21.1606	1.77531	15.1836	1.57793	15.5234	1.43767
	473.5	18.6117	2.1221	21.0425	1.69761	15.4202	1.68277	15.8929	1.4044
	474	18.0781	1.99233	20.9665	1.72743	15.4525	1.66677	16.0215	1.53099
	474.5	18.1702	1.89517	20.9436	1.81192	15.1181	1.70546	15.0325	1.43552
	475	17.8551	1.8191	20.6145	1.82242	15.6698	1.71094	15.0836	1.28507
	475.5	18.2779	1.82519	20.783	1.89425	15.4092	1.73993	15.0494	1.3227
	476	18.543	1.92918	20.9812	2.01569	14.7842	1.61015	15.002	1.21802
	476.5	18.9265	2.1479	21.1832	2.01952	14.9331	1.55928	14.4593	1.24421
	477	18.9748	2.08573	20.714	1.97079	15.2613	1.57606	15.0326	1.22779
	477.5	19.2238	2.13131	21.0183	1.97398	14.6812	1.70059	15.6051	1.21274
	478	19.0913	2.12884	21.5845	1.90656	15.0935	1.61539	15.6973	1.15043
	478.5	18.9522	2.09295	21.3043	1.89899	14.9106	1.67833	15.7674	1.13997
	479	18.6502	1.97539	21.4583	1.90345	14.2669	1.73532	15.4297	1.34625
	479.5	18.5217	2.02111	21.3483	1.6875	14.5265	1.65719	14.9952	1.36022
	480	18.3376	2.0125	21.5617	1.73879	14.7423	1.65697	14.4586	1.3832
	480.5	18.473	1.97456	21.2252	1.70946	15.2906	1.69194	14.7131	1.38312
	481	18.4162	1.81374	21.3317	1.82471	15.4131	1.67538	14.293	1.35332
	481.5	18.3492	1.81775	20.8698	1.80021	15.0923	1.70501	14.2039	1.35094
	482	18.4132	1.75737	21.0914	1.76464	14.8189	1.6129	14.5543	1.38389
	482.5	18.6071	1.69055	20.883	1.64235	14.8956	1.64636	14.7206	1.38454
	483	18.587	1.84051	21.2222	1.6258	14.6169	1.72835	14.939	1.37376
	483.5	18.1671	1.90496	21.0514	1.64621	14.7325	1.79073	15.2034	1.34779
	484	18.2122	1.96867	21.4221	1.62743	15.2637	1.74571	15.2402	1.3298
	484.5	18.1205	1.85492	21.4549	1.61947	15.4717	1.73707	15.2271	1.27968
	485	17.9907	1.90717	21.1152	1.74446	14.9934	1.80365	14.9091	1.25418
	485.5	18.3182	1.9698	20.7958	1.85969	14.4696	1.95822	14.8026	1.40467
	486	18.1377	1.85865	20.9703	1.9088	14.5459	2.02426	14.6596	1.23298
	486.5	18.4057	1.82445	20.6864	1.74946	14.4859	1.87804	13.7627	1.3586
	487	18.0202	1.72939	20.6118	1.69505	14.8594	1.76029	14.2856	1.5482
	487.5	18.0695	1.6103	21.0489	1.69729	14.9529	1.81129	14.4383	1.64653
	488	18.1193	1.67908	20.8708	1.75144	14.7212	1.77849	14.5361	1.56322
	488.5	18.9386	1.77635	21.1575	1.93436	14.6366	1.83129	14.4618	1.44826
	489	19.0312	2.01138	21.1305	1.93292	14.5463	1.84444	14.6354	1.39965
	489.5	19.2139	2.13426	21.506	1.9169	14.5687	1.81305	14.4387	1.31337
	490	19.3905	2.03199	21.3239	1.93447	14.8402	1.7379	14.6217	1.33801
	490.5	19.3416	2.10612	20.9042	1.99057	14.4975	1.58446	14.5668	1.31793
	491	18.607	2.24924	21.126	1.98206	14.2997	1.5351	14.9287	1.27934
	491.5	18.7211	2.27966	21.3204	1.98304	14.685	1.61987	15.1025	1.57213
	492	18.363	2.20461	21.239	1.98325	14.828	1.58673	15.5069	1.43648
	492.5	18.189	2.25697	21.4459	1.89767	14.5611	1.6609	15.2425	1.41425
	493	18.4409	2.33666	21.3511	1.8157	14.6615	1.71675	15.0878	1.45864
	493.5	18.6157	2.2948	21.419	1.7092	14.558	1.65953	14.765	1.36834
	494	18.565	2.26557	21.0894	1.72923	14.2389	1.62503	14.6386	1.24615
	494.5	18.6657	2.07223	21.1406	1.81083	14.4787	1.55638	14.668	1.49267
	495	19.0028	2.07864	21.5183	1.86098	14.176	1.59971	14.6663	1.39468
	495.5	18.9216	2.14453	21.6757	1.86142	14.3221	1.51397	14.0165	1.49459
	496	19.0329	2.08886	21.6353	1.8557	14.3671	1.5486	14.288	1.51935
	496.5	18.9318	1.83832	21.6409	1.79077	14.6012	1.59097	14.3743	1.54087
	497	18.8407	1.83405	21.6578	1.91146	14.8596	1.84609	14.6655	1.2919
	497.5	19.0714	1.77671	21.6724	1.81478	14.3787	1.78685	14.7966	1.37861
	498	18.8704	1.68838	21.3004	1.78787	14.8225	1.83454	14.2961	1.32282
	498.5	18.8601	1.71962	21.82	1.82964	14.9295	1.83938	14.8394	1.2041
	499	18.2726	1.66119	20.3483	1.95353	13.7577	1.92434	13.5144	1.43823
	499.5	16.3321	1.96996	18.7896	2.07792	11.8412	1.89633	11.9807	1.42098
