# Supplementary material for: PKCδ is an activator of neuronal mitochondrial metabolism that mediates the spacing effect on memory consolidation
Source: eLife. 2024 Oct 30;13:RP92085. doi: 10.7554/eLife.92085 (PMC11524582; doi:10.7554/eLife.92085)
Supplement: Figure 3—source data 1. [file elife-92085-fig3-data1.xlsx]

## Sheet: Fig.3a
	1x, test at 24h
	tub-GAL80ts; VT30559-GAL4/+	tub-GAL80ts; VT30559-GAL4>UAS-PDK RNAi KK106641	+/UAS-PDK RNAi KK106641
	0	0.2	0.09
	0.07	0	0.06
	0.23	0.12	-0.12
	0.08	0.15	0.2
	-0.01	0.23	0.16
	0.1	0.13	-0.08
	0.01	0.36	0.34
	0.06	0.3	-0.34
	0.01	-0.23	-0.03
	0.06	0.27	0.15
	-0.2	0.13	0.27
	0.03	0.31	-0.08
	0.18	0.22	0.06
	-0.12	0.21	0.11
	-0.02	0.17	0.04
	0.13	0.22	0.23
	0.24	0.41	0.25
	0.13	0.27	-0.03

## Sheet: Fig.3b
	Time traces										Slope
		No RNAi				PKCδ RNAi JF02991					No RNAi		PKCδ RNAi JF02991
		Control (unpaired)		5x spaced		Control (unpaired)		5x spaced			Control (unpaired)	5x spaced	Control (unpaired)	5x spaced
	Time (s)	Mean	SEM	Mean	SEM	Mean	SEM	Mean	SEM		0.60187	1.3551	0.96023	0.27468
	0	0.492733	0.683003	0.45229	0.537418	-1.08539	0.703675	0.227377	0.655367		0.797155	1.1114	0.78892	1.21375
	0.5	1.27256	0.616314	0.51623	0.602477	0.116194	0.580493	0.991104	0.506492		0.92478	1.07065	0.55808	0.70599
	1	1.78857	0.473444	0.748815	0.596587	0.377474	0.605363	1.22744	0.45208		0.40288	1.30125	0.76048	0.61338
	1.5	1.79912	0.373397	0.5762	0.577489	0.518779	0.499655	0.901868	0.390176		0.43938	0.858085	0.62522	0.444575
	2	1.73974	0.369593	0.362045	0.54005	0.228271	0.555482	0.358554	0.41352		0.70781	1.4196	0.67213	0.36702
	2.5	1.54288	0.426243	0.198406	0.437867	0.230877	0.605187	0.453643	0.38564		0.71856	1.1375	0.583545	0.89709
	3	1.3635	0.411768	0.256868	0.455467	0.125865	0.625957	0.592222	0.353116		0.74789	1.11543	0.46372	0.593645
	3.5	1.40564	0.4993	0.469832	0.330977	0.0721047	0.568958	0.625218	0.243558		0.74859	1.33374	0.6	0.43423
	4	1.63343	0.409076	0.569294	0.250429	0.0840113	0.522124	0.531013	0.22931		0.59607	1.03678	1.02896	1.066
	4.5	1.59744	0.406882	0.42947	0.323658	0.239077	0.56026	0.578889	0.289878
	5	1.51206	0.386657	0.54883	0.277858	0.265306	0.609167	0.263707	0.436335
	5.5	1.51262	0.387547	0.835577	0.256391	0.441872	0.432993	0.244614	0.471233
	6	1.39306	0.335824	0.769663	0.291238	0.369428	0.416885	0.760582	0.399394
	6.5	1.44143	0.428416	0.669036	0.26701	0.485348	0.454978	0.934488	0.369013
	7	1.22972	0.36405	0.525873	0.261577	0.156568	0.385581	0.578468	0.372429
	7.5	1.47472	0.402178	0.426518	0.309316	0.236658	0.413829	0.656687	0.455878
	8	1.17146	0.371055	0.308925	0.343058	0.2691	0.428247	0.625331	0.493724
	8.5	1.51851	0.428063	0.488149	0.278635	0.27985	0.470572	0.619034	0.489116
	9	1.44687	0.415584	0.534949	0.242855	0.381778	0.512601	0.444703	0.471177
	9.5	1.33731	0.330318	0.372982	0.250604	0.451065	0.516109	0.516493	0.466859
	10	1.34176	0.35812	0.317204	0.245378	0.303186	0.521061	0.442658	0.423796
	10.5	1.40239	0.314075	0.0616672	0.232863	0.199368	0.42086	0.232705	0.470693
	11	1.49716	0.343773	0.253804	0.162199	0.059331	0.407112	0.14541	0.431971
	11.5	1.31756	0.360571	0.271389	0.246317	0.3013	0.320129	0.535846	0.54305
	12	1.46344	0.320584	0.34209	0.237317	0.354007	0.324554	0.371173	0.641696
	12.5	1.01309	0.304482	0.189492	0.262419	0.068471	0.22192	0.590669	0.434415
	13	0.927485	0.309066	0.0886158	0.187568	0.191855	0.300536	0.251218	0.336987
	13.5	0.913045	0.361553	0.0650578	0.252189	-0.201191	0.311615	0.170841	0.313963
	14	0.870952	0.394462	0.150821	0.251571	-0.176715	0.331907	0.145739	0.264695
	14.5	0.805049	0.336438	0.139028	0.234457	0.0115382	0.371876	0.242162	0.253454
	15	0.868811	0.320897	0.0298777	0.265107	0.0309558	0.318237	0.195118	0.360425
	15.5	0.930425	0.359715	0.153915	0.262479	-0.0900871	0.326794	0.229675	0.38903
	16	1.14875	0.365459	0.0779203	0.236757	-0.151451	0.246592	0.366003	0.374431
	16.5	1.0901	0.316066	0.0234289	0.168353	0.238335	0.327865	0.363788	0.321453
	17	0.939228	0.326974	0.0820844	0.164777	0.179966	0.245436	0.773178	0.261205
	17.5	0.985963	0.290008	0.227439	0.146802	0.365153	0.323201	0.451786	0.241598
	18	0.878647	0.288951	-0.071964	0.208238	0.164644	0.450245	0.760303	0.300655
	18.5	0.841373	0.330838	-0.240925	0.212451	0.0857542	0.413917	0.396185	0.202551
	19	0.988543	0.324672	0.0587382	0.240571	-0.207739	0.305189	0.518167	0.220244
	19.5	0.952837	0.306807	-0.0974354	0.231494	-0.187805	0.331632	0.560953	0.562592
	20	0.793944	0.382926	-0.0116519	0.300349	0.0421321	0.30737	0.55709	0.349714
	20.5	0.780306	0.298728	0.192533	0.286538	-0.049295	0.277566	0.195856	0.238533
	21	0.826778	0.316797	0.259961	0.182234	0.0656452	0.304373	0.199565	0.193968
	21.5	0.559774	0.313918	0.114365	0.164994	-0.0725471	0.326653	0.435639	0.176078
	22	0.713513	0.31534	0.252943	0.14144	-0.0344766	0.290487	0.247085	0.229069
	22.5	0.603599	0.299361	0.156209	0.177163	0.351552	0.313744	0.598071	0.203821
	23	0.607681	0.304253	0.0822289	0.159317	0.2023	0.351775	0.489538	0.211246
	23.5	0.455225	0.323578	0.0753479	0.162168	-0.18285	0.333098	0.223169	0.248927
	24	0.550946	0.298602	0.0285231	0.133464	-0.0412901	0.248763	-0.199634	0.317632
	24.5	0.375687	0.276565	0.0288466	0.189012	-0.161327	0.329572	-0.128179	0.28275
	25	0.353123	0.28095	-0.0497098	0.119848	-0.25042	0.313064	-0.248566	0.216544
	25.5	0.27459	0.291716	0.0600023	0.19839	-0.0348777	0.303978	9.239e-06	0.305339
	26	0.458133	0.261551	-0.110907	0.204645	0.0990684	0.311677	0.0254069	0.34518
	26.5	0.687226	0.32082	-0.0930748	0.244148	0.273836	0.270288	0.193865	0.293424
	27	0.610717	0.309452	-0.033554	0.184701	0.564182	0.234888	0.136573	0.319069
	27.5	0.481377	0.262294	0.0931499	0.203741	0.43579	0.206722	0.00518669	0.31009
	28	0.422099	0.248858	0.126445	0.222812	0.339506	0.324136	-0.210525	0.401871
	28.5	0.268029	0.268544	0.184995	0.267238	0.295567	0.318242	-0.0423044	0.392881
	29	0.157124	0.259015	0.198215	0.216158	0.0686706	0.272638	-0.327837	0.4339
	29.5	-0.265967	0.25591	-0.221446	0.150845	0.0681241	0.329957	0.260249	0.403123
	30	-0.49846	0.225276	-0.297464	0.17828	0.155877	0.335593	-0.0219994	0.358073
	30.5	-0.67181	0.179091	-0.164072	0.20153	0.46602	0.30954	0.100726	0.272706
	31	-0.916854	0.266777	-0.0195962	0.153219	0.310286	0.286778	-0.0532199	0.214621
	31.5	-0.902724	0.264965	0.0504008	0.137274	0.377354	0.276415	-0.0474589	0.285825
	32	-1.0318	0.251127	-0.0403624	0.216728	0.334023	0.224957	-0.679908	0.414672
	32.5	-0.863618	0.257256	0.0574461	0.17092	0.135915	0.209545	-0.398479	0.301334
	33	-0.821156	0.332972	-0.0131747	0.150099	-0.337957	0.295414	-0.427441	0.290128
	33.5	-0.488747	0.23535	-0.232512	0.213324	-0.074865	0.271602	-0.585222	0.305167
	34	-0.211912	0.254719	-0.349417	0.197073	-0.308658	0.355536	-0.462825	0.313063
	34.5	0.0531256	0.292668	-0.300679	0.212038	-0.488916	0.397536	-0.0422677	0.407561
	35	-0.166285	0.249459	-0.428824	0.188008	-0.443336	0.350407	-0.184961	0.253597
	35.5	-0.175015	0.337235	-0.395086	0.23769	-0.124991	0.352636	-0.324501	0.306381
	36	-0.334748	0.304627	-0.273281	0.22861	0.22292	0.360565	-0.182437	0.325937
	36.5	-0.044915	0.307312	-0.26134	0.231346	0.177416	0.228632	-0.0231431	0.399295
	37	-0.322807	0.278081	-0.250128	0.264682	0.544849	0.336659	0.296769	0.417136
	37.5	-0.426599	0.265888	-0.0599614	0.21752	0.192224	0.412245	0.37009	0.447787
	38	-0.538861	0.271066	-0.265098	0.218997	-0.0746324	0.26717	0.294622	0.573133
	38.5	-0.532091	0.344669	-0.257478	0.280152	-0.647572	0.238534	0.232261	0.459908
	39	-0.601506	0.32856	-0.205497	0.279503	-0.280991	0.351942	0.282266	0.420396
	39.5	-0.466445	0.325926	-0.278917	0.263601	-0.201993	0.323734	-0.0106647	0.364352
	40	-0.53059	0.287177	-0.279463	0.23542	-0.266478	0.328484	-0.613658	0.344573
	40.5	-0.501864	0.330929	-0.097804	0.326893	-0.547069	0.313671	-0.576231	0.307633
	41	-0.626085	0.351895	-0.128326	0.329546	-0.263228	0.257884	-0.948976	0.311778
	41.5	-0.511023	0.448974	0.0943569	0.21959	-0.24997	0.300952	-0.847605	0.318831
	42	-0.456818	0.525799	0.0311226	0.243766	-0.225433	0.431925	-0.679698	0.335594
	42.5	-0.924394	0.414457	0.217535	0.276259	-0.128513	0.418317	-0.640489	0.36578
	43	-0.963136	0.441944	0.151278	0.195297	-0.0901334	0.413603	-0.6191	0.373779
	43.5	-1.46922	0.356672	0.120323	0.235456	-0.402707	0.411102	-0.294911	0.470654
	44	-1.62721	0.399546	0.0544207	0.238508	-0.28245	0.398493	-0.348703	0.632558
	44.5	-1.47172	0.430919	0.26142	0.181285	-0.114617	0.341299	-0.558314	0.538929
	45	-1.29613	0.42326	0.199177	0.180103	0.0953687	0.35749	-0.293179	0.435006
	45.5	-1.2187	0.462147	0.18277	0.223618	-0.0909532	0.26948	-0.154948	0.506187
	46	-1.04693	0.564606	0.160987	0.355663	0.452129	0.368235	-0.312959	0.468517
	46.5	-1.13874	0.599397	0.0924963	0.255189	0.261905	0.327691	-0.145841	0.379982
	47	-1.11133	0.526878	-0.257602	0.361965	0.411174	0.227846	0.0700931	0.359464
	47.5	-1.54712	0.625267	-0.314187	0.325733	0.2143	0.196023	-0.0894799	0.305356
	48	-1.55582	0.381935	-0.487855	0.329485	0.274515	0.24279	-0.139288	0.32587
	48.5	-1.5018	0.332702	-0.256189	0.303434	0.337398	0.215784	-0.0752037	0.279128
	49	-1.56223	0.352516	-0.0698128	0.338136	0.312504	0.236034	-0.28914	0.464588
	49.5	-1.55453	0.33675	-0.0342641	0.298274	0.596616	0.259555	-0.671465	0.558154
	50	-1.53064	0.301296	-0.167932	0.356734	0.254996	0.322391	-0.568336	0.386017
	50.5	-1.27048	0.394765	-0.338829	0.360351	0.220997	0.547781	-0.516125	0.323373
	51	-1.50627	0.529077	-0.428081	0.348988	-0.0925435	0.362351	-0.487217	0.257429
	51.5	-1.34761	0.514638	-0.441905	0.191953	-0.225528	0.413246	-0.761369	0.232808
	52	-1.46433	0.584096	-0.39235	0.170909	-0.529856	0.373349	-0.506418	0.169883
	52.5	-1.48277	0.571426	-0.190866	0.202286	-0.695956	0.402358	-0.538876	0.219063
	53	-1.09898	0.634471	-0.283892	0.233586	-0.517684	0.388422	-0.311703	0.267124
	53.5	-1.2261	0.483692	-0.302021	0.198158	-0.349313	0.39197	-0.588051	0.312603
	54	-1.25999	0.474408	-0.368639	0.182304	-0.435423	0.391807	-0.624589	0.432384
	54.5	-1.13266	0.573298	-0.459641	0.183316	-0.313878	0.469991	-0.789423	0.469918
	55	-1.41984	0.480292	-0.779097	0.259792	-0.354878	0.437451	-0.959473	0.476316
	55.5	-1.73923	0.459709	-0.638459	0.203393	-0.302658	0.508971	-1.0628	0.441453
	56	-1.59894	0.494791	-0.488124	0.234665	-0.490115	0.552791	-0.826424	0.702029
	56.5	-1.36035	0.471289	-0.711313	0.218724	-0.86552	0.459435	-1.23632	0.379425
	57	-1.42037	0.423175	-0.495051	0.244919	-1.04215	0.438925	-1.01501	0.428966
	57.5	-1.50889	0.46715	-0.44233	0.366322	-0.880083	0.495731	-1.23343	0.513538
	58	-1.41942	0.411983	-0.351795	0.370912	-0.902576	0.458509	-1.45412	0.545475
	58.5	-1.80167	0.382547	-0.428394	0.269961	-1.06721	0.337973	-2.09598	0.508738
	59	-2.30449	0.477204	-0.350882	0.260105	-0.910119	0.397706	-1.76461	0.515176
	59.5	-2.2282	0.48572	-0.2661	0.261022	-0.829942	0.422151	-1.70049	0.367277
	60	-2.16297	0.653967	-0.440422	0.28341	-0.545027	0.333523	-1.43333	0.328469
	60.5	-1.66509	0.471911	-0.471585	0.280181	-0.759403	0.364634	-1.57457	0.530367
	61	-1.46498	0.396723	-0.0880845	0.350501	-0.558864	0.382523	-1.23539	0.328385
	61.5	-1.25006	0.449335	0.394936	0.327162	-0.389643	0.432097	-1.46235	0.631137
	62	-1.27693	0.486114	0.575807	0.385221	-0.504194	0.41174	-1.56534	0.638985
	62.5	-1.04667	0.543934	1.08766	0.522756	-0.0794439	0.61996	-1.36559	0.50682
	63	-1.20022	0.587504	1.51927	0.55809	0.11666	0.609355	-0.859031	0.571491
	63.5	-1.08968	0.530081	1.67964	0.541018	0.222997	0.526234	-0.700851	0.569659
	64	-0.951531	0.605629	1.86718	0.559753	0.135705	0.492152	-0.504094	0.58689
	64.5	-0.18551	0.558704	2.27752	0.522036	0.224787	0.501381	-0.876966	0.5142
	65	0.100048	0.534809	2.91667	0.739634	0.464913	0.521341	-0.748888	0.472361
	65.5	0.184439	0.602254	3.52321	0.73472	0.522133	0.517914	-0.460946	0.517413
	66	0.312812	0.836	3.87139	0.744163	0.482453	0.453447	0.435707	0.368947
	66.5	0.886358	0.920248	4.35877	0.708676	0.627449	0.514324	0.996168	0.319989
	67	1.37288	0.944096	4.68729	0.735266	0.916216	0.544671	1.04368	0.331677
	67.5	1.86772	1.10563	4.97625	0.648073	1.02486	0.560542	1.11215	0.46849
	68	2.21946	1.10011	5.69756	0.679775	1.30657	0.801086	1.3102	0.63132
	68.5	2.85147	1.03715	5.93994	0.716593	2.04722	0.758319	1.81435	0.788998
	69	2.95872	1.11602	6.63106	0.841923	2.14905	0.804331	1.58367	0.926692
	69.5	3.35085	1.05269	7.12347	0.91962	2.37563	0.734365	2.16178	0.850939
	70	3.53135	1.0556	7.38298	0.923408	2.79007	0.773855	2.8639	0.904713
	70.5	3.9578	1.04391	7.94723	0.850088	3.37692	0.808503	3.24557	1.09685
	71	4.28561	1.06146	8.41763	0.800229	3.14701	0.79895	3.15719	1.07371
	71.5	4.28773	1.05801	8.8796	0.662152	3.44211	0.900139	3.47006	1.0884
	72	4.62684	1.06395	9.24481	0.633991	4.34688	0.903088	3.37124	1.11807
	72.5	4.7743	1.0718	9.73673	0.577783	4.44953	0.813611	3.20974	1.12256
	73	5.10364	0.989332	9.95335	0.631718	4.53222	0.912223	3.13798	1.10161
	73.5	5.18132	1.01876	10.3299	0.663153	5.19425	0.827152	3.3182	1.0767
	74	5.84741	0.896581	10.5792	0.673553	5.41993	0.818139	3.83589	1.01778
	74.5	6.40322	0.894219	10.7815	0.771006	5.63913	0.811969	4.01091	1.10012
	75	6.97838	0.833843	11.5202	0.763262	5.99732	0.838073	4.17969	1.13216
	75.5	7.53963	0.743568	11.8187	0.885306	5.49684	0.889519	4.13786	1.14752
	76	7.62641	0.747676	11.8478	0.858178	5.86837	0.925786	4.69288	1.10467
	76.5	7.71894	0.795424	11.7324	0.943341	6.08017	0.828948	4.56058	1.1024
	77	7.8625	0.828631	11.9399	0.967294	6.93511	0.925283	5.27733	1.06987
	77.5	7.634	0.898238	12.1142	1.00699	6.78134	0.788777	5.29703	1.02772
	78	7.95179	0.900814	12.33	0.894281	7.12765	0.824793	5.88956	1.06195
	78.5	8.32049	0.923115	12.4538	0.902079	7.18136	0.863356	6.30346	1.16035
	79	8.71862	0.949246	12.5524	0.785412	7.45761	0.941307	6.19058	1.20199
	79.5	8.56506	0.996261	12.4761	0.852492	7.33377	0.894584	6.36616	1.30649
	80	8.81149	1.01441	12.3596	0.82748	7.63689	0.894679	6.6233	1.29415
	80.5	9.15398	0.995735	12.2709	0.910419	7.70951	0.624397	6.77974	1.42477
	81	9.33928	0.900434	12.5619	1.00083	8.62989	0.638194	6.99701	1.35511
	81.5	10.2163	0.716924	12.4743	1.14186	8.92565	0.529602	7.3292	1.26408
	82	10.0352	0.758603	12.3842	1.10747	9.61323	0.627564	7.47229	1.11755
	82.5	10.5164	0.730285	12.6754	1.15441	9.52328	0.801718	7.68513	1.14361
	83	10.3963	0.746442	12.4593	1.09021	9.67942	0.904198	8.0287	1.06687
	83.5	10.3316	0.807052	12.6008	1.04314	10.7272	1.04384	8.1018	1.04486
	84	10.3253	0.722287	12.8591	1.02909	10.4886	0.923546	8.67293	1.04325
	84.5	10.5125	0.837758	12.8031	1.04396	10.6318	0.938101	8.86974	1.06411
	85	10.6332	0.870066	13.0339	1.10765	11.2732	0.888657	9.42333	1.12469
	85.5	10.5001	0.834737	13.1094	1.06769	11.2875	0.875503	9.76078	1.10104
	86	10.8006	0.739871	13.0198	1.17244	10.8899	0.736828	9.9867	1.16438
	86.5	11.0047	0.764666	13.0559	1.1703	10.5917	0.768798	10.2805	1.18613
	87	11.0013	0.889671	13.5622	1.04818	10.4359	0.752037	10.414	1.21591
	87.5	11.0238	0.955476	13.7363	1.10696	10.552	0.743848	10.0707	1.15782
	88	11.223	0.963946	13.8113	1.12373	10.2207	0.808343	10.6176	1.2301
	88.5	11.348	1.0042	13.7125	1.1209	10.4856	0.833505	10.4607	1.22551
	89	11.4367	1.00616	13.777	1.18307	10.7667	0.806551	10.2436	1.35231
	89.5	11.5324	0.832633	13.5588	1.14288	10.8538	0.728087	10.4039	1.24128
	90	11.4843	0.732468	13.8151	1.14983	10.9427	0.73363	10.7531	1.33114
	90.5	11.2572	0.764125	14.0945	1.27106	11.3877	0.702067	10.5639	1.20583
	91	11.2071	0.803579	14.1186	1.29879	11.1292	0.841416	10.5238	1.06529
	91.5	11.1017	0.750592	14.1671	1.30202	11.3715	0.880375	10.5121	1.0329
	92	10.9004	0.991024	14.3122	1.32512	11.2151	0.909023	11.3867	1.03945
	92.5	11.2162	0.873156	14.2062	1.25411	11.2105	1.05573	11.4748	1.02302
	93	11.0331	0.774658	13.9874	1.20512	11.1347	1.05828	11.2458	1.08825
	93.5	11.077	0.776706	14.0437	1.14667	11.3165	1.06014	11.683	1.15041
	94	11.0654	0.942609	14.0464	1.09043	11.2276	0.915474	12.0455	0.96182
	94.5	10.6278	0.876474	13.9145	1.06746	11.8543	0.916721	11.7667	0.993944
	95	10.6331	0.863036	13.9437	1.01549	11.8733	0.836601	11.5929	0.85552
	95.5	10.71	0.911403	13.8564	1.05378	11.68	0.725109	11.6478	1.05419
	96	11.297	0.791854	13.8773	1.09277	11.4869	0.683016	11.5918	1.06496
	96.5	11.3097	0.762786	14.0308	1.19813	11.3573	0.780169	11.4077	1.05801
	97	11.4169	0.796972	13.9302	1.14436	11.0278	0.896849	11.5977	0.88492
	97.5	11.3075	0.874253	14.301	1.26931	11.0025	0.865958	11.6305	0.999359
	98	11.2681	0.790678	14.4881	1.21997	11.0542	0.862359	11.5056	1.02804
	98.5	11.1928	0.811043	14.4213	1.21775	11.0409	0.807425	11.5286	1.09445
	99	11.2656	0.863475	14.7577	1.186	11.3831	0.852292	11.9255	1.03608
	99.5	11.5378	0.774226	14.7736	1.15766	11.6717	0.786877	11.4053	0.998724
	100	11.7575	0.814699	14.7815	1.14347	12.0533	0.72892	11.6855	0.912622
	100.5	12.0958	0.912908	14.6744	1.1744	12.113	0.71592	11.9288	0.944487
	101	12.1578	0.937688	14.855	1.06265	12.2945	0.763418	11.7368	0.906966
	101.5	12.3152	0.885452	14.5334	1.08031	12.0288	0.576914	11.6381	0.968291
	102	12.1807	0.906805	14.3719	1.13635	12.6786	0.700589	11.5617	0.935656
	102.5	12.4741	0.792071	14.3228	1.13159	12.2464	0.683481	11.8521	0.972277
	103	12.5984	0.839312	14.5794	1.13011	11.8042	0.500351	11.5231	0.97819
	103.5	12.3339	0.780182	14.7163	1.18004	12.0501	0.606394	11.4726	0.944613
	104	12.2065	0.859169	14.4202	1.07965	12.0509	0.594744	11.3888	0.987769
	104.5	12.1745	0.843559	14.7741	1.18589	11.7122	0.646219	11.6697	0.920379
	105	11.9814	0.780874	14.9712	1.20679	12.2223	0.760952	11.3647	0.777674
	105.5	11.6395	0.890792	15.0032	1.20229	12.2394	0.809061	11.4471	0.702669
	106	12.1723	0.649266	14.8867	1.1987	12.4872	0.727196	11.9444	0.802668
	106.5	11.7303	0.671026	14.989	1.21922	12.0931	0.894647	11.4745	0.886961
	107	11.5868	0.899226	15.3181	1.20761	12.3082	0.872515	11.266	0.899893
	107.5	11.7901	0.960074	15.4542	1.15913	12.1	0.898895	11.4328	0.888546
	108	12.0172	0.887161	15.491	1.06986	12.0351	0.809606	11.7155	0.937382
	108.5	11.4659	0.822723	15.5778	1.14425	11.9918	0.840818	11.5787	0.956189
	109	11.8098	0.938583	15.7451	1.20896	12.3899	0.954701	11.1896	0.923364
	109.5	11.5152	0.806317	15.8153	1.15561	12.542	0.895035	11.4975	0.968539
	110	11.7656	0.774774	15.7172	1.22675	12.367	0.67814	11.9703	0.895412
	110.5	12.095	0.805073	15.9071	1.08581	12.4434	0.669061	11.5929	0.865385
	111	12.0126	0.935886	15.6345	1.05084	12.4136	0.719074	11.9555	0.905694
	111.5	12.2905	0.74883	15.7692	0.956454	12.2256	0.669109	12.3177	0.952898
	112	12.5253	0.835907	15.9192	1.05207	12.2489	0.648548	12.4965	1.04795
	112.5	12.1872	0.878266	15.6224	1.07632	12.6464	0.64958	12.7178	1.06392
	113	12.3791	0.790312	16.054	1.08387	12.4889	0.709937	12.5037	1.05373
	113.5	12.5277	0.887417	16.0807	1.06602	12.306	0.70473	12.3993	1.07945
	114	12.4521	0.752593	15.9895	1.05145	12.5378	0.772736	12.1473	0.978969
	114.5	12.5322	0.758054	15.8568	1.1301	12.4544	0.809991	12.1869	0.987959
	115	12.3419	0.715205	16.1776	1.12106	12.3525	0.808598	12.4266	0.806806
	115.5	12.0747	0.768319	16.104	1.18457	12.6855	0.815154	12.6617	0.783505
	116	12.0294	0.745983	16.0787	1.21615	12.6118	0.777037	12.5455	0.907045
	116.5	12.1881	0.875037	16.0431	1.34565	12.5255	0.788835	12.7755	0.923104
	117	12.4732	0.859684	16.1725	1.28884	12.7365	0.735324	12.9197	0.988084
	117.5	12.5411	0.791026	15.7173	1.26333	12.7383	0.816951	12.9156	0.988532
	118	12.84	0.827346	15.5117	1.33	12.8459	0.928705	12.8271	0.995302
	118.5	12.8164	0.840833	15.3998	1.29617	12.9911	0.948705	12.5186	0.844887
	119	12.5964	0.699964	15.5342	1.31672	12.5751	0.831337	12.8059	0.935457
	119.5	12.7797	0.742401	15.2759	1.21396	12.7749	0.876521	13.0063	0.866124
	120	12.7239	0.739289	15.3933	1.2121	13.4621	1.25097	13.5098	0.882068
	120.5	12.6237	0.78278	15.8342	1.18189	12.9374	0.961904	13.3095	0.879303
	121	12.9897	0.72776	15.4708	1.2925	13.0613	0.991501	13.2203	0.948779
	121.5	12.8818	0.855877	15.5722	1.27619	13.3551	0.909572	13.2106	0.820394
	122	12.8438	0.833105	15.7541	1.19452	13.3551	0.918283	13.2632	0.817102
	122.5	12.9469	0.767932	15.9137	1.24084	13.3773	0.842826	13.0798	0.766203
	123	13.1468	0.744206	15.8493	1.14092	13.3543	0.832629	13.0689	0.740863
	123.5	12.788	0.751845	16.0998	1.14482	13.2121	0.974832	12.8383	0.770341
	124	13.0859	0.793668	16.2353	1.1752	13.0328	1.08254	13.647	0.851328
	124.5	13.1955	0.821013	15.9047	1.16992	12.9809	1.08238	13.597	0.863815
	125	13.3224	0.824175	15.9573	1.21577	13.0167	1.08372	13.4381	0.871199
	125.5	13.2612	0.81495	16.0339	1.30408	13.0073	1.11097	13.209	0.925223
	126	13.1345	0.80746	16.1254	1.27163	13.0364	1.11473	13.2415	0.935179
	126.5	13.3044	0.807297	16.2377	1.15015	13.4876	0.955986	12.7478	0.895237
	127	13.4895	0.772321	16.028	1.21902	13.5861	0.972929	12.9097	0.895784
	127.5	13.3983	0.815052	16.1005	1.05577	13.7586	1.10214	12.9658	0.902315
	128	13.6069	0.822612	16.482	1.05095	13.4017	1.02319	12.6864	0.82571
	128.5	13.2361	1.04438	16.3216	1.06554	13.5658	1.07221	12.4776	0.713736
	129	13.3276	1.03236	16.4523	1.15666	13.5361	1.12554	12.8109	0.754972
	129.5	13.3478	0.892556	16.2983	1.21484	13.6642	1.12036	12.7319	0.76975
	130	13.6186	0.823082	16.4154	1.30357	13.8127	1.12496	12.4871	0.914313
	130.5	13.7233	0.861094	16.2499	1.2803	13.7063	1.10198	12.8093	1.17802
	131	14.09	0.774117	16.0969	1.2509	13.4957	1.05547	12.863	1.10979
	131.5	13.8505	0.776668	16.2872	1.16125	13.5739	1.05612	12.6867	1.13993
	132	14.099	0.833553	16.4991	1.23076	13.3883	0.974703	13.0584	1.18414
	132.5	14.0369	0.817571	16.4751	1.22874	13.2796	1.0166	12.9703	1.03117
	133	14.1226	0.868404	16.3971	1.23473	13.4354	1.1808	12.3383	1.24419
	133.5	13.999	0.859376	16.4882	1.09853	13.4141	1.26768	12.4432	1.2334
	134	13.8729	0.808056	16.6191	1.03455	13.1969	1.27828	12.6057	1.17868
	134.5	13.4216	0.866211	16.8843	0.981267	13.252	1.30837	12.375	1.20177
	135	13.2584	0.902256	16.6161	0.961338	13.4995	1.41534	12.6842	1.21706
	135.5	13.38	0.859396	16.5222	0.998165	13.6862	1.38995	12.8706	1.14412
	136	13.5702	0.818218	16.6096	1.02883	13.4554	1.05572	12.9387	1.27982
	136.5	13.383	0.868889	16.3895	1.08367	13.6601	1.09471	13.0087	1.36092
	137	13.5541	0.943302	16.5531	1.16129	13.4907	1.12958	12.9241	1.31086
	137.5	13.7074	0.940871	16.5015	1.18258	13.0532	1.07813	12.7543	1.4886
	138	14.1398	0.894196	16.5224	1.2022	13.1789	1.06379	12.98	1.53913
	138.5	13.981	0.985249	16.8646	1.22896	13.2532	1.10002	12.5965	1.2614
	139	14.3371	1.06499	16.8345	1.20708	12.9575	1.10428	12.1345	1.35126
	139.5	14.604	0.887439	16.563	1.1316	13.216	1.04517	11.9185	1.40208
	140	14.7413	0.905422	16.4027	1.09785	13.3849	1.12584	12.0162	1.22624
	140.5	14.7572	0.843906	16.5821	1.11856	13.257	1.21603	12.0328	1.23458
	141	14.974	0.808583	16.296	1.15141	12.664	1.22054	11.8779	1.2184
	141.5	15.0112	0.821012	16.5032	1.1098	12.7389	1.2151	11.84	1.3022
	142	14.9901	0.86138	16.7377	1.18627	12.6721	1.25548	12.6382	1.22264
	142.5	14.828	0.87582	16.6374	1.30232	12.7844	1.17923	12.4937	1.21317
	143	14.6405	0.905557	16.4106	1.22026	12.7891	1.15793	12.2959	1.12796
	143.5	14.7135	0.893688	16.4439	1.20535	13.1372	1.25766	12.3967	1.28428
	144	14.8696	0.799323	16.2709	1.15765	13.2648	1.27474	12.4746	1.33744
	144.5	14.9159	0.728136	16.439	1.25589	12.8692	1.23229	12.3538	1.28806
	145	14.8703	0.724082	16.6503	1.11487	12.8097	1.33458	12.3078	1.31185
	145.5	14.5342	0.787581	16.8296	1.18269	13.086	1.35475	12.548	1.51364
	146	14.5804	0.812171	16.7636	1.22137	13.0253	1.29039	12.5708	1.43145
	146.5	14.4654	0.747148	17.02	1.21498	13.221	1.10795	12.7363	1.32831
	147	14.7639	0.71131	16.8504	1.25879	13.3134	1.22057	12.2718	1.45478
	147.5	14.9962	0.644924	16.8653	1.40035	13.5532	1.03329	12.528	1.41946
	148	15.0552	0.70993	16.5972	1.54808	13.4355	1.03476	12.7061	1.36278
	148.5	14.7558	0.683753	16.4503	1.44177	12.9928	1.106	13.0959	1.32477
	149	15.1592	0.757711	16.6178	1.34824	13.4914	1.11196	12.6462	1.57076
	149.5	14.8738	0.736445	16.8289	1.39108	13.8986	1.26974	13.0434	1.55864
	150	14.995	0.687271	16.4514	1.35283	13.6206	1.43413	12.4993	1.64758
	150.5	14.8956	0.784641	16.4785	1.1681	13.2712	1.41209	12.9861	1.71388
	151	14.7594	0.779641	16.6914	1.17604	13.2961	1.30684	12.6497	1.71522
	151.5	14.7899	0.864047	16.7112	1.25311	13.3716	1.3325	12.5782	1.66116
	152	14.8033	0.842992	16.5433	1.20192	13.241	1.20338	12.5269	1.59915
	152.5	14.8797	0.900221	16.4715	1.17068	13.6767	1.29151	12.8351	1.57344
	153	14.9047	0.90695	16.6946	1.26208	13.4978	1.23506	12.5499	1.48443
	153.5	14.8599	0.899084	16.4075	1.18219	13.543	1.23148	12.8395	1.33646
	154	15.3919	0.82581	16.6774	1.17012	13.3474	1.2441	12.9477	1.37276
	154.5	15.1624	0.917227	16.4093	1.25717	13.3639	1.2448	12.5977	1.4254
	155	15.1746	0.977022	16.6565	1.24636	13.3357	1.22965	12.3382	1.45002
	155.5	15.4413	1.02472	16.5956	1.33837	13.0626	1.30394	12.13	1.50711
	156	15.3423	0.894794	16.8836	1.35635	12.5694	1.2321	12.3774	1.59167
	156.5	15.2193	0.833561	16.7657	1.32586	13.0816	1.14641	12.7948	1.55961
	157	14.9738	0.705166	17.1637	1.31827	13.3025	1.11958	12.9821	1.50413
	157.5	14.8087	0.744926	17.1502	1.29702	13.3142	1.26504	13.2023	1.72702
	158	14.7834	0.786229	16.7739	1.26848	13.3137	1.15701	13.0446	1.47965
	158.5	14.8433	0.825828	17.0366	1.25943	13.3925	1.22618	12.3732	1.49423
	159	15.2098	0.857007	17.0593	1.24233	13.0654	1.09159	12.5026	1.56367
	159.5	15.1253	0.954054	17.2915	1.25894	12.89	1.09858	12.4994	1.56217
	160	15.5033	0.881575	17.2292	1.28779	13.0003	1.14062	12.6584	1.56689
	160.5	15.5034	0.841483	17.217	1.25907	12.9114	0.980684	12.5509	1.63512
	161	15.575	0.791603	17.0597	1.20766	12.4709	1.0607	12.7905	1.62041
	161.5	15.4197	0.815623	17.2295	1.16673	12.4046	1.06029	13.2522	1.68475
	162	15.2884	0.802227	16.7264	1.14878	12.6374	1.06148	13.3864	1.69903
	162.5	15.1014	0.878186	16.888	1.10519	12.866	1.17164	13.3156	1.70781
	163	15.1878	0.927866	16.9607	1.22945	13.2083	1.10355	12.7401	1.76048
	163.5	15.1	0.971934	16.7553	1.22686	13.194	1.13724	13.0073	1.8854
	164	14.8515	0.991497	16.6761	1.24399	13.7425	1.12569	12.7369	1.78898
	164.5	15.0805	1.02874	17.1707	1.21969	13.4347	1.26515	12.4625	1.72736
	165	15.0441	0.933693	16.8888	1.27374	13.4299	1.05318	12.5241	1.65109
	165.5	15.0214	0.834077	17.0107	1.252	13.2777	1.0186	13.2743	1.67287
	166	15.0301	0.840583	17.0331	1.23754	13.1171	1.03009	12.6075	1.5886
	166.5	14.8784	0.921294	17.2413	1.28879	13.1876	1.09532	12.0206	1.5129
	167	14.7505	0.866268	17.0742	1.24914	13.2451	1.04199	12.7905	1.60567
	167.5	15.0504	0.93921	17.0043	1.25648	13.3574	1.07624	12.7325	1.56926
	168	15.2325	0.945045	17.1576	1.28011	13.3714	1.07923	12.1923	1.71568
	168.5	15.2339	0.867833	17.2188	1.35221	13.3016	1.01169	12.1889	1.66127
	169	15.3499	0.879833	17.2349	1.30375	13.3899	1.05641	12.0134	1.65598
	169.5	15.2988	0.814205	17.5974	1.41299	13.2899	1.17987	11.9155	1.69251
	170	15.7924	0.838451	17.5003	1.34998	13.3538	1.13585	12.4166	1.6332
	170.5	15.5275	0.912253	17.3875	1.37349	13.622	1.04156	12.6603	1.67028
	171	15.822	0.887573	17.165	1.30193	13.6763	0.942335	12.9092	1.69183
	171.5	15.7792	0.913363	17.0383	1.28763	13.5321	0.923312	12.6508	1.85283
	172	15.7209	0.900597	16.8226	1.24699	13.3913	1.12228	12.9335	1.78743
	172.5	15.3883	0.915709	16.6737	1.16744	13.3367	1.14836	12.5161	1.77492
	173	15.6759	0.899955	16.5795	1.18427	12.6281	0.964797	12.6978	1.7375
	173.5	15.8411	0.881988	16.815	1.21166	12.5394	1.08269	12.9047	1.74418
	174	15.7395	0.964733	17.235	1.28071	12.3243	0.961671	12.5483	1.6702
	174.5	15.8553	0.906573	17.5242	1.36129	12.1815	0.86689	12.3424	1.77477
	175	15.8363	0.893472	17.5531	1.35998	12.2287	0.882166	12.4536	1.63886
	175.5	15.782	1.02432	17.7616	1.38464	12.2616	0.841745	12.7622	1.70449
	176	16.0494	0.976536	17.7682	1.39636	12.4604	0.770352	12.9656	1.68183
	176.5	16.0287	1.05275	17.7011	1.37324	12.9082	0.850002	12.8684	1.70181
	177	15.7088	1.04435	17.2593	1.25476	13.2691	0.956695	12.7039	1.67212
	177.5	15.8913	1.01796	17.4147	1.25988	12.8878	0.988449	13.2018	1.59746
	178	15.6415	1.11048	17.2786	1.37269	13.0768	0.995799	12.9999	1.60764
	178.5	15.5124	1.11479	17.2022	1.27233	12.731	0.953371	12.968	1.68012
	179	15.1825	1.10659	17.3026	1.27754	12.4269	1.01027	13.0069	1.62981
	179.5	15.396	0.889776	17.3847	1.3073	12.6929	1.02168	12.7914	1.42692
	180	15.4126	0.922403	17.3729	1.32571	12.6194	1.21005	12.8768	1.38757
	180.5	15.3969	0.926273	17.1478	1.27562	12.9245	1.24344	13.1978	1.50157
	181	15.3988	0.836659	17.1373	1.18355	13.0469	1.24012	12.8028	1.51844
	181.5	15.2682	0.87072	17.0375	1.30912	13.2162	1.1753	12.7707	1.51815
	182	15.4571	0.988373	17.2811	1.35612	13.8056	1.1562	13.2835	1.54149
	182.5	15.4274	1.01141	16.5711	1.29519	13.61	1.17226	13.7648	1.54766
	183	15.4653	1.00744	16.9268	1.34065	13.3501	1.09541	13.737	1.53162
	183.5	15.417	0.972646	16.8592	1.27532	13.1482	0.969994	13.5382	1.60456
	184	15.4414	0.951126	17.0321	1.23007	12.7553	0.961291	13.7963	1.62602
	184.5	16.0169	0.942389	17.16	1.28456	12.828	1.06683	13.5738	1.67724
	185	15.9336	0.991585	17.222	1.29086	12.4358	1.02271	13.4218	1.44171
	185.5	15.8996	0.949714	17.3686	1.27876	12.8944	1.0933	13.3663	1.40409
	186	15.7817	0.939013	17.3311	1.36555	12.8485	1.07114	13.5461	1.51954
	186.5	15.4259	0.912101	17.3573	1.32928	12.8774	1.08125	13.719	1.64299
	187	15.3146	0.895805	17.4372	1.36876	13.3662	1.09094	13.7076	1.76859
	187.5	15.2536	0.940087	17.3568	1.42008	13.1371	1.05462	13.447	1.82355
	188	14.6664	1.1454	17.4243	1.38953	13.3155	1.22429	13.4369	1.87897
	188.5	14.7369	1.01868	17.4372	1.4084	13.0268	1.18912	13.5254	1.87948
	189	14.8526	0.967983	17.1872	1.34438	13.2265	1.29822	13.341	1.84067
	189.5	14.6464	0.977731	17.1926	1.36384	12.7188	1.25764	13.4088	1.70459
	190	14.7414	0.925937	17.5124	1.3179	13.2761	1.39464	13.0946	1.57167
	190.5	14.6331	0.92567	17.4306	1.26643	13.6187	1.48214	12.7145	1.47013
	191	14.9185	0.936136	17.4539	1.25668	13.1538	1.4316	12.6256	1.38609
	191.5	15.1832	1.02931	17.5231	1.27359	12.8303	1.24181	12.9183	1.34794
	192	15.0485	0.95994	17.4874	1.23796	12.8853	1.50873	13.1111	1.49293
	192.5	14.742	0.957659	17.1462	1.20014	12.4437	1.52886	13.2117	1.45796
	193	15.3287	0.848789	16.9526	1.26325	12.3992	1.39346	13.1227	1.43938
	193.5	15.3293	0.739343	16.8814	1.34135	12.5569	1.32663	13.0032	1.53756
	194	15.0117	0.767355	17.0004	1.36423	12.2003	1.36169	12.8272	1.5104
	194.5	14.9746	0.750809	16.667	1.35905	12.6785	1.23989	12.9455	1.44738
	195	15.0526	0.78909	16.9234	1.34265	12.643	1.25526	13.0667	1.5278
	195.5	15.204	0.825944	17.0344	1.5054	12.5874	1.30636	12.9755	1.6718
	196	15.0631	0.917147	16.9461	1.41475	12.2419	1.4145	13.155	1.61191
	196.5	15.4046	1.04202	16.9596	1.41881	13.432	1.48976	12.7669	1.66094
	197	15.5844	1.07327	17.4529	1.44052	12.6222	1.60539	12.5796	1.64049
	197.5	15.3289	1.03883	17.2743	1.4285	12.8226	1.42432	12.5617	1.67128
	198	14.8394	1.05343	17.1428	1.24574	12.4415	1.36807	12.6524	1.63828
	198.5	15.2197	1.0561	17.1235	1.33253	12.4626	1.30216	12.6782	1.75258
	199	15.2597	0.994571	17.054	1.18463	12.1357	1.25583	13.2098	1.81336
	199.5	15.1308	0.982361	17.0659	1.21134	12.4277	1.24543	13.0338	1.79917
	200	14.8572	1.02587	16.9596	1.27042	12.4249	1.30384	13.238	1.72041
	200.5	15.1209	0.959454	16.9896	1.29521	12.9393	1.28675	13.0698	1.64283
	201	14.7754	1.00337	17.0172	1.31646	12.5796	1.30782	12.7442	1.62839
	201.5	14.864	0.979745	16.9742	1.28469	12.8772	1.26453	12.6269	1.4509
	202	15.0573	0.94481	17.1159	1.30887	12.9174	1.24029	12.6867	1.46233
	202.5	15.3687	0.90516	17.2645	1.24518	12.9459	1.31255	13.1058	1.56929
	203	15.0411	0.938837	17.4304	1.29838	12.3616	1.39767	12.9242	1.53608
	203.5	15.4698	0.924664	17.3487	1.32166	12.6082	1.29333	12.8019	1.5227
	204	15.3129	1.01903	17.2296	1.29085	12.6521	1.37712	12.5248	1.47346
	204.5	15.6089	0.92927	17.109	1.30268	12.4352	1.47581	13.3523	1.63952
	205	15.2362	0.845908	17.0242	1.27471	12.4079	1.3496	12.3501	1.55254
	205.5	15.3565	0.944742	17.0559	1.32546	13.1649	1.31994	12.6034	1.78827
	206	15.5275	1.00764	16.9187	1.32597	12.8364	1.31113	12.3092	1.93092
	206.5	15.4349	1.01516	16.8172	1.32975	12.9362	1.36174	12.5273	1.77443
	207	15.4526	0.996674	16.8391	1.29679	12.9794	1.33999	11.8666	1.8075
	207.5	15.2695	0.914826	16.8684	1.32356	12.7226	1.26913	12.3595	1.63919
	208	15.0349	0.930571	16.7552	1.2683	12.2952	1.34204	12.2938	1.68993
	208.5	15.019	0.972408	16.7192	1.23998	12.4476	1.29118	12.2952	1.79929
	209	14.8334	0.841924	16.6682	1.18264	12.352	1.36127	12.1036	1.84813
	209.5	14.9724	0.910127	16.5967	1.21403	12.053	1.29451	12.5175	1.6082
	210	15.0801	0.997255	16.6388	1.21296	11.7958	1.41292	12.1263	1.66728
	210.5	15.2548	0.78025	16.4681	1.29033	11.556	1.37211	12.2836	1.3562
	211	15.0622	0.694015	16.4947	1.33514	11.319	1.36988	12.1953	1.54923
	211.5	15.0476	0.802255	16.717	1.39008	11.9387	1.47164	12.2798	1.55593
	212	15.1485	0.853959	16.7049	1.3726	11.9508	1.36568	12.4331	1.66508
	212.5	15.629	0.926253	16.9091	1.38697	12.4454	1.25287	12.2106	1.5153
	213	15.5701	0.990209	17.1984	1.30677	12.3405	1.34389	12.1814	1.68133
	213.5	15.8202	1.05628	17.5141	1.39262	12.3647	1.30699	12.5703	1.45483
	214	15.2003	1.0306	17.3416	1.35056	12.3298	1.15461	12.9452	1.4758
	214.5	15.1095	1.03934	17.7265	1.32374	12.1445	1.17284	12.8608	1.48768
	215	14.9223	0.983352	17.2329	1.20814	12.3705	1.07335	13.4647	1.52648
	215.5	15.3572	1.06494	17.2454	1.21074	12.3604	1.0404	13.2313	1.53675
	216	15.2178	1.00916	16.9427	1.15739	12.6429	1.22524	13.1194	1.45814
	216.5	15.2245	1.02734	17.1614	1.19409	12.6532	1.26205	13.2594	1.47012
	217	15.4339	1.10949	16.6651	1.12171	12.9535	1.2269	13.2524	1.43922
	217.5	15.5155	1.1482	16.9855	1.1945	12.8043	1.23435	12.8901	1.51155
	218	15.2348	1.10853	17.1906	1.24905	12.9099	1.32479	12.9503	1.41986
	218.5	15.3479	1.11586	17.4004	1.1426	12.847	1.34605	13.1489	1.49075
	219	15.2682	0.962257	17.5144	1.20031	13.1907	1.35564	12.6564	1.27756
	219.5	15.5127	0.899085	17.7108	1.24714	12.8774	1.17345	12.2725	1.32867
	220	15.9069	1.02218	17.4864	1.2879	13.1164	1.27965	12.6141	1.46098
	220.5	15.4341	0.975683	17.4133	1.24677	12.4264	1.21988	12.0657	1.41623
	221	14.8599	0.904464	17.2704	1.32906	12.5553	1.33512	11.9053	1.33155
	221.5	14.908	0.915887	17.4334	1.29276	12.4685	1.37195	11.6214	1.46174
	222	14.9929	1.1017	17.3304	1.25767	12.717	1.33881	12.1224	1.6129
	222.5	14.8981	1.03783	17.2384	1.24468	12.3583	1.38246	11.974	1.53958
	223	15.1608	1.00516	17.4776	1.2939	12.9875	1.34621	12.3122	1.55467
	223.5	15.7449	1.15995	17.4876	1.34531	12.831	1.54912	12.2274	1.55863
	224	16.1304	1.08114	17.4332	1.36674	12.364	1.43045	12.3909	1.68289
	224.5	15.5352	1.12078	17.4302	1.43219	12.3018	1.43241	13.4218	1.95098
	225	15.2958	1.02276	17.4829	1.4211	12.6511	1.41623	13.1632	2.12565
	225.5	14.9087	1.09185	17.695	1.52396	12.2163	1.33816	12.7773	2.11426
	226	14.8108	1.16625	17.3879	1.4412	11.8263	1.30515	12.7736	2.00063
	226.5	15.1461	1.19005	17.4364	1.51758	11.9708	1.20254	12.8402	1.96565
	227	15.1687	1.09843	17.6028	1.49792	11.9691	1.368	12.5308	1.9077
	227.5	15.2764	1.1778	17.5861	1.3996	11.9863	1.40541	12.7325	1.73796
	228	14.9376	1.23176	17.3253	1.387	11.5265	1.32041	12.5488	1.6869
	228.5	15.4285	1.31813	17.1098	1.30113	11.8203	1.45221	11.9348	1.54143
	229	15.2732	1.21935	17.1079	1.32534	12.2509	1.52127	12.211	1.58872
	229.5	15.2778	1.06594	16.9841	1.30632	12.3882	1.53521	12.1941	1.6371
	230	15.647	1.1773	16.8971	1.32986	12.4224	1.45428	12.2163	1.61453
	230.5	15.8589	1.00689	16.9386	1.49718	12.7337	1.50445	12.4695	1.63752
	231	15.5376	0.962672	16.7317	1.52258	12.4543	1.40648	11.9652	1.56202
	231.5	15.6112	0.967007	16.9569	1.47943	12.7523	1.47693	12.2373	1.62526
	232	16.0685	1.0536	17.1122	1.52749	12.5719	1.47341	12.3079	1.61015
	232.5	15.7504	1.10348	17.0813	1.47112	12.577	1.53735	11.9918	1.39236
	233	15.4467	1.15394	17.0195	1.30952	12.5341	1.47871	12.0844	1.54029
	233.5	15.8148	1.1859	16.966	1.32255	12.5186	1.55769	12.3195	1.45383
	234	15.5026	1.13329	17.0125	1.38282	12.8359	1.57431	11.9922	1.70121
	234.5	15.4403	1.17877	16.9855	1.36439	12.7659	1.59792	12.3865	1.91464
	235	15.2802	1.13755	17.0641	1.36865	12.5972	1.27395	12.3258	2.01121
	235.5	15.5632	1.05385	17.1262	1.49548	12.4641	1.37699	11.8545	1.88122
	236	15.7188	1.02691	17.0133	1.46653	12.6101	1.38827	12.0617	1.967
	236.5	15.5433	1.0194	16.5972	1.33402	12.3766	1.40095	11.9614	1.97924
	237	15.6935	1.03097	16.5966	1.41927	13.0597	1.34084	12.0433	2.07104
	237.5	16.0934	0.962449	16.8605	1.45035	12.4529	1.38528	12.2444	2.11095
	238	15.9914	0.998141	16.672	1.47607	12.6269	1.30202	12.2098	2.03585
	238.5	16.0384	1.07813	16.4587	1.48882	12.1982	1.40729	12.6207	1.85952
	239	16.0567	1.14703	16.7669	1.4296	12.5545	1.2502	12.6088	1.7932
	239.5	16.2257	1.15016	17.1587	1.42642	12.151	1.33547	12.7641	1.69298
	240	16.0399	1.11574	16.8163	1.3614	12.3689	1.35587	12.6726	1.90678
	240.5	16.0546	1.17055	16.5944	1.25641	12.3499	1.68269	13.114	1.95002
	241	15.5569	1.0819	16.6707	1.26125	12.8857	1.64099	13.1198	2.20909
	241.5	15.6591	1.13147	16.3379	1.3937	12.5656	1.62515	13.2228	2.35412
	242	15.5588	1.10527	16.2789	1.37689	12.3136	1.39006	12.1737	1.85815
	242.5	15.662	1.0685	16.1169	1.45594	13.0339	1.36642	11.8176	1.81328
	243	15.9148	0.991425	16.7546	1.5099	12.8192	1.38724	11.7848	1.76264
	243.5	15.8251	1.07083	16.4756	1.39021	12.7966	1.26609	12.2547	1.83598
	244	15.9305	1.20926	16.5669	1.34347	12.6845	1.13928	12.4496	1.71925
	244.5	15.9718	1.22078	15.45	1.064	12.585	1.25641	12.2271	1.86879
	245	16.1489	1.25158	15.4927	1.01678	12.6272	1.34002	12.2855	1.97326
	245.5	16.39	1.1606	15.4947	1.0474	12.6672	1.35273	12.5842	1.98229
	246	16.049	1.1057	15.252	1.08721	12.7578	1.52632	12.7651	2.04761
	246.5	15.5516	1.10463	15.1973	1.17439	12.7834	1.38473	12.5975	2.00223
	247	15.7511	1.14178	15.1688	1.19087	12.8229	1.46608	12.8797	1.85123
	247.5	15.952	1.11639	15.3062	1.23132	12.0436	1.37993	12.7338	1.80054
	248	16.0559	1.2217	15.1522	1.16027	12.0903	1.4174	12.9844	1.83109
	248.5	16.4107	1.22823	15.5333	1.13868	12.3462	1.55298	13.2749	1.86528
	249	16.0022	1.32145	15.1123	1.25891	11.8884	1.62136	11.9816	1.89334
	249.5	14.5689	1.37557	14.6805	1.35883	10.0302	1.26628	11.4458	1.90276

## Sheet: Fig.3c
	5x spaced
	tub-GAL80ts; c739-GAL4/+	+/UAS-PKCδ RNAi JF02991; UAS-PDK RNAi KK106641	tub-GAL80ts; c739-GAL4>UAS-PKCδ RNAi JF02991	tub-GAL80ts; c739-GAL4>UAS-PDK RNAi KK106641	tub-GAL80ts; c739-GAL4>UAS-PKCδ RNAi JF02991; UAS-PDK RNAi KK106641
	0.25	0.4	0.2	0.33	0.23
	0.32	0.32	0.09	0.28	0.25
	0.38	0.12	0.12	0.12	0.2
	0.22	0.25	0.02	0.27	0.32
	0.25	0.26	0.18	0.22	0.27
	0.3	0.29	0.15	0.32	0.18
	0.1	0.24	0.3	0.36	0.25
	0.18	0.38	0.12	0.22	0.26
	0.25	0.15	0.24	0.13	0.35
	0.4	0.12	0.15	0.31	0.17
	0.33	0.22	0.02	0.23	0.18
	0.22	0.32	0.1	0.14	0.22
