# Supplementary material for: PKCδ is an activator of neuronal mitochondrial metabolism that mediates the spacing effect on memory consolidation
Source: eLife. 2024 Oct 30;13:RP92085. doi: 10.7554/eLife.92085 (PMC11524582; doi:10.7554/eLife.92085)
Supplement: Figure 4—source data 1. [file elife-92085-fig4-data1.xlsx]

## Sheet: Fig.4a
	No graph displayed on Fig. 4a

## Sheet: Fig.4b
	Time traces										δCKAR response
		No RNAi				DAMB RNAi KK110947					No RNAi		DAMB RNAi KK110947
		Control		MP1 activation		Control		MP1 activation			Control	MP1 activation	Control	MP1 activation
	Time (s)	Mean	SEM	Mean	SEM	Mean	SEM	Mean	SEM		-1.7856	3.24525	0.62795	-0.960431
	0	-1.37509	0.24335	-2.1905	0.570859	-1.75746	0.357132	-1.23202	0.721367		-1.88119	0.63412	-0.249605	-0.50266
	2	-0.563193	0.247219	-1.66879	0.665892	-0.872746	0.402446	-0.222477	0.626218		-1.5827	2.3513	-1.3889	-1.32182
	4	-0.068558	0.151207	-1.11001	0.472184	-0.522287	0.404059	0.33256	0.553541		0.47135	0.928045	0.17225	-0.806895
	6	-0.0772081	0.156903	-0.714637	0.335683	-0.434488	0.344776	0.3231	0.503138		-1.8044	2.7885	-0.01539	-0.302925
	8	-0.0407776	0.193162	-1.10192	0.50942	-0.468099	0.280705	0.153476	0.379816		-2.7428	-1.02975	-0.069645	-1.31091
	10	-0.126876	0.214134	-0.424065	0.259342	-0.31462	0.249551	0.211537	0.178264		-0.84954	0.81125	-5.2323	-1.32912
	12	0.0683093	0.308595	-0.00326501	0.288803	-0.431153	0.222412	0.195972	0.219027		-0.90695	1.64	-0.12081	-3.04589
	14	-0.0721945	0.273995	-0.259379	0.36046	-0.52768	0.270234	-0.0540587	0.226269		1.46313	5.46335	-2.47848
	16	-0.0599999	0.190729	-0.272205	0.182902	-0.550685	0.194932	0.105849	0.358263		0.28126
	18	-0.226992	0.145092	-0.20193	0.204334	-0.419301	0.289474	0.152958	0.397915
	20	-0.172954	0.135361	-0.337192	0.320352	-0.326438	0.29398	0.453459	0.455621
	22	-0.127811	0.21004	-0.633976	0.37356	-0.223021	0.298385	0.105176	0.360545
	24	0.134837	0.207538	-0.510825	0.341715	-0.18559	0.295394	-0.266234	0.219784
	26	0.0964027	0.190033	-0.324435	0.342098	-0.149194	0.230928	-0.187675	0.302493
	28	-0.19145	0.192351	-0.302448	0.377784	-0.487692	0.20332	-0.422809	0.242467
	30	-0.221465	0.209356	-0.32868	0.334569	-0.461506	0.168239	-0.286668	0.184609
	32	-0.169818	0.195391	-0.188164	0.3381	-0.641064	0.254106	-0.330057	0.173611
	34	-0.410364	0.242998	0.29443	0.237019	-0.538229	0.247368	-0.417712	0.218637
	36	-0.281145	0.298076	0.0322896	0.221157	-0.2049	0.129772	-0.288662	0.142064
	38	-0.207213	0.296675	0.0577465	0.350403	-0.224597	0.162843	-0.00932544	0.146536
	40	-0.182868	0.275769	0.0804864	0.419157	0.081371	0.179323	0.0113988	0.127392
	42	-0.281234	0.174563	0.0592886	0.377091	-0.168438	0.158099	-0.242426	0.152396
	44	-0.243863	0.122205	-0.344253	0.235384	-0.0141209	0.2185	-0.343833	0.190661
	46	-0.190817	0.105256	0.0404014	0.204282	-0.00307879	0.241711	-0.0935602	0.200859
	48	0.0605392	0.203271	0.0587948	0.251822	-0.201091	0.188525	0.0450725	0.308742
	50	-0.222272	0.170859	0.116275	0.162605	-0.247465	0.249963	-0.154385	0.237879
	52	-0.0834825	0.236316	0.0188302	0.171574	-0.231537	0.314545	0.237631	0.132625
	54	0.00105415	0.287381	0.0621492	0.170754	-0.024212	0.255412	0.426492	0.152376
	56	0.131606	0.190055	0.289835	0.282805	-0.077292	0.254262	0.597364	0.170352
	58	0.139909	0.241781	-0.00366491	0.177255	-0.0678927	0.193977	0.353728	0.21668
	60	0.0202547	0.153401	-0.0540359	0.202587	0.126372	0.14247	0.811008	0.230615
	62	-0.0387088	0.177945	-0.0800243	0.214126	0.290581	0.202893	0.488649	0.271374
	64	-0.00729823	0.165436	-0.101684	0.242426	0.521326	0.191641	0.27052	0.220292
	66	0.190451	0.179225	0.0105414	0.230516	0.366502	0.237158	0.0318056	0.299026
	68	0.103014	0.162191	0.282457	0.305732	0.451954	0.243343	-0.0835524	0.312722
	70	0.150896	0.187349	0.38914	0.221314	0.424015	0.271341	-0.329692	0.2931
	72	0.357696	0.17666	0.606042	0.269082	0.22546	0.16629	-0.301546	0.346758
	74	0.397325	0.217269	0.564686	0.242539	0.275714	0.228864	-0.22293	0.237051
	76	-0.00197111	0.239539	0.641784	0.261547	0.275924	0.162676	-0.0591149	0.248434
	78	0.0415626	0.163096	0.365118	0.3035	-0.143097	0.21675	-0.0722371	0.260348
	80	0.127038	0.159087	0.727258	0.352532	-0.134227	0.246208	-0.0921897	0.288187
	82	0.241002	0.143094	0.356569	0.30066	0.0249675	0.256718	0.120374	0.236682
	84	0.0111268	0.144099	0.226325	0.18974	0.0736302	0.271417	-0.037875	0.200686
	86	0.0645305	0.157702	0.322445	0.28357	0.106243	0.270361	-0.0771023	0.182681
	88	0.0399028	0.146011	0.0862704	0.226415	0.325626	0.301308	-0.0937207	0.163117
	90	0.0246691	0.200064	0.0935947	0.286009	0.246372	0.257683	-0.0455033	0.152269
	92	0.206533	0.182441	-0.0408146	0.292703	0.168552	0.218626	0.148959	0.153531
	94	0.238083	0.171433	-0.151144	0.357412	0.46576	0.26117	0.111494	0.205661
	96	0.234622	0.168855	-0.144939	0.250207	0.206222	0.274968	0.194268	0.161234
	98	0.146111	0.124041	-0.221603	0.306516	0.172283	0.244713	0.200817	0.166933
	100	0.139789	0.120341	-0.140733	0.260671	0.165184	0.209254	0.240177	0.132273
	102	0.101722	0.0988481	0.157681	0.23883	0.330412	0.190224	0.0830954	0.176893
	104	0.259526	0.103315	0.0302152	0.222084	0.416032	0.196268	0.00208811	0.198251
	106	0.0723688	0.218092	0.143007	0.215172	0.342695	0.163973	-0.0843229	0.271353
	108	0.0246649	0.209772	0.338316	0.294567	0.391167	0.176004	-0.414935	0.295963
	110	-0.0981265	0.23356	0.229562	0.263603	0.565529	0.212154	-0.321187	0.405736
	112	0.0267317	0.194545	0.29959	0.275415	0.402677	0.245929	-0.280574	0.386082
	114	-0.180331	0.238349	0.446931	0.261274	0.381187	0.276977	-0.565168	0.370225
	116	-0.0477475	0.284069	0.542768	0.239001	0.392877	0.312507	-0.463659	0.231791
	118	0.0301298	0.285573	0.257792	0.269313	0.0725269	0.33948	-0.335367	0.163902
	120	0.134247	0.250528	0.437259	0.300269	0.133034	0.327643	-0.0869801	0.114147
	122	0.265168	0.274694	0.388078	0.250066	0.412714	0.388202	0.0957542	0.204173
	124	0.544595	0.474197	0.331705	0.223726	0.31838	0.392031	0.489178	0.395597
	126	0.927827	0.483662	1.13284	0.434244	0.636434	0.454168	0.781952	0.478648
	128	0.943809	0.460804	1.56951	0.529903	0.999071	0.49872	0.705526	0.551918
	130	1.02968	0.44799	1.7691	0.712075	1.47652	0.547379	0.670906	0.680126
	132	0.679688	0.358849	1.68318	0.64219	1.41835	0.526907	0.419723	0.592504
	134	0.426642	0.366079	1.21523	0.707884	0.593096	0.685853	0.185274	0.640553
	136	0.299882	0.360033	0.210912	0.343396	0.41574	0.706821	0.109805	0.594988
	138	0.0970403	0.396558	-0.225097	0.384058	0.220569	0.777167	-0.0763067	0.54461
	140	0.0337913	0.437378	-0.32488	0.305454	-0.510962	0.375168	-0.484372	0.378687
	142	0.0222746	0.453733	-0.485373	0.383899	-0.633958	0.312574	-0.883156	0.367541
	144	-0.0281776	0.451911	-0.262632	0.595602	-0.700732	0.342526	-0.674577	0.293173
	146	-0.00513722	0.461994	-0.292794	0.683748	-0.653967	0.313704	-0.486863	0.349949
	148	-0.279793	0.340901	-0.582488	0.716992	-0.515306	0.355306	-0.506121	0.315123
	150	-0.643383	0.370051	-0.444819	0.72539	-0.524751	0.37131	-0.642465	0.402711
	152	-0.653006	0.370554	-0.672941	0.668498	-0.741451	0.336873	-0.672382	0.331091
	154	-0.6588	0.392955	-0.568144	0.628284	-0.80318	0.330009	-0.797654	0.404907
	156	-0.788039	0.396421	-0.754894	0.560752	-1.12461	0.332838	-0.820164	0.424055
	158	-0.647243	0.384775	-0.966867	0.404283	-0.981295	0.207442	-0.823785	0.381495
	160	-0.684748	0.402331	-1.03026	0.427154	-1.02376	0.270785	-0.786971	0.352402
	162	-0.725792	0.33387	-1.03176	0.445173	-0.920449	0.235315	-1.16028	0.330498
	164	-0.812738	0.347991	-1.4099	0.542634	-1.04571	0.315687	-0.76665	0.30354
	166	-0.968656	0.187747	-1.18209	0.602025	-0.769344	0.283276	-0.60433	0.29235
	168	-0.914324	0.253404	-1.38104	0.63539	-0.837726	0.341447	-0.636864	0.224323
	170	-1.01492	0.224669	-1.31059	0.594589	-0.844615	0.307079	-0.671985	0.2456
	172	-0.970684	0.202552	-1.26191	0.624207	-0.916949	0.347074	-0.828674	0.193105
	174	-1.04157	0.18556	-1.20663	0.573497	-0.807827	0.347768	-0.775407	0.267256
	176	-0.90494	0.153048	-1.29467	0.559876	-0.923336	0.417335	-0.923059	0.350168
	178	-0.708011	0.34316	-1.1249	0.538976	-1.01371	0.375809	-1.02366	0.347761
	180	-0.667691	0.340127	-1.11464	0.538442	-0.971811	0.312809	-1.30951	0.271991
	182	-0.775717	0.180534	-1.26853	0.484615	-1.06901	0.301551	-0.995229	0.311771
	184	-0.788072	0.185429	-1.5134	0.482852	-1.29607	0.30875	-1.02472	0.280012
	186	-0.804033	0.18936	-1.49291	0.476367	-1.2011	0.387317	-0.969355	0.223484
	188	-0.883235	0.188581	-1.26759	0.421563	-1.19135	0.389081	-0.946535	0.242663
	190	-1.14681	0.251364	-1.55781	0.446453	-1.12394	0.36943	-0.85109	0.23867
	192	-1.12325	0.244682	-1.65809	0.456155	-1.22376	0.360437	-0.956339	0.265875
	194	-1.3136	0.276731	-1.61562	0.488458	-1.49622	0.382056	-1.01021	0.267654
	196	-1.48182	0.273538	-1.58178	0.426376	-1.29255	0.365911	-1.0757	0.318071
	198	-1.44628	0.293106	-1.78608	0.45984	-0.837837	0.324799	-1.011	0.378011
	200	-1.40374	0.276017	-1.8021	0.445247	-1.01989	0.330796	-0.912618	0.322105
	202	-1.4698	0.270737	-1.94309	0.444796	-1.09961	0.356144	-0.869329	0.362619
	204	-1.40686	0.240814	-1.75635	0.431963	-0.975326	0.334196	-0.860896	0.277877
	206	-1.11558	0.317891	-1.83178	0.533502	-1.1282	0.367646	-0.879338	0.248146
	208	-1.08602	0.291267	-1.83145	0.434381	-1.11159	0.390582	-0.831654	0.301371
	210	-1.16825	0.309508	-2.01463	0.639806	-1.0022	0.388358	-0.987071	0.357203
	212	-1.19863	0.285347	-1.88382	0.542072	-0.885969	0.333622	-0.931815	0.303195
	214	-1.21777	0.320765	-2.00665	0.535372	-0.585924	0.315261	-0.81132	0.311558
	216	-1.28507	0.299984	-2.03463	0.466804	-0.713571	0.359382	-0.871856	0.312034
	218	-1.52125	0.349883	-1.89693	0.519798	-0.712449	0.273171	-0.780673	0.27288
	220	-1.15628	0.310826	-1.688	0.373768	-0.62939	0.302365	-0.86326	0.268012
	222	-1.07365	0.265958	-1.76239	0.484817	-0.741341	0.356925	-0.928282	0.399995
	224	-0.974352	0.267151	-2.06198	0.438641	-0.746328	0.368328	-1.12016	0.332277
	226	-0.958538	0.258393	-1.96846	0.548282	-0.935999	0.370644	-1.19041	0.357758
	228	-0.820076	0.239073	-2.27706	0.572602	-0.980238	0.38716	-1.0106	0.338722
	230	-0.940251	0.192304	-2.46884	0.60183	-0.93447	0.408558	-0.936108	0.222985
	232	-0.978517	0.162213	-2.38504	0.617748	-0.838567	0.427871	-0.858433	0.205149
	234	-1.18541	0.250612	-1.92453	0.694576	-1.07379	0.332153	-0.745572	0.312593
	236	-1.4861	0.326022	-2.17904	0.556721	-1.13138	0.337086	-0.605612	0.330869
	238	-1.14132	0.490369	-2.07482	0.636545	-1.07876	0.333692	-0.594782	0.30455
	240	-1.01234	0.496751	-2.4281	0.67797	-1.4968	0.249911	-0.902657	0.238287
	242	-1.067	0.458915	-2.89373	0.606804	-1.59583	0.293315	-1.11013	0.270023
	244	-1.55257	0.219024	-3.31762	0.723791	-1.75263	0.342992	-1.39935	0.364997
	246	-1.71887	0.335738	-4.11528	0.810432	-1.81878	0.336047	-2.29865	0.410421
	248	-2.13371	0.280092	-4.35327	0.944646	-2.2629	0.34525	-2.59898	0.452339
	250	-2.40903	0.289627	-3.93706	0.885905	-2.314	0.526003	-2.40929	0.479934
	252	-2.05672	0.319438	-3.79281	0.936575	-2.25304	0.687909	-1.69795	0.30115
	254	-1.97026	0.333552	-3.16215	0.75026	-1.91581	0.727352	-1.00342	0.344016
	256	-1.81543	0.324431	-3.01095	0.786366	-1.59243	0.783762	-1.03104	0.38546
	258	-1.32278	0.235581	-2.73089	0.791524	-1.33228	0.645517	-0.850356	0.35158
	260	-1.22969	0.181156	-2.91262	0.85194	-1.0419	0.576051	-0.737182	0.2874
	262	-1.06471	0.192848	-3.11428	0.956868	-0.644244	0.538803	-0.966883	0.338955
	264	-1.01287	0.200996	-3.18901	1.02699	-0.435618	0.486718	-0.969681	0.314367
	266	-0.917181	0.22537	-2.87727	1.03557	-0.508039	0.437259	-0.41729	0.355637
	268	-0.928132	0.238639	-2.74555	0.979296	-0.517531	0.410879	-0.500534	0.360839
	270	-0.729148	0.277838	-2.63605	1.11058	-0.647531	0.384744	-0.750836	0.385097
	272	-0.469672	0.311291	-2.44815	1.15014	-0.710061	0.450844	-0.537642	0.300693
	274	-0.493597	0.339022	-2.68845	1.27408	-0.616842	0.421128	-0.388328	0.356258
	276	-0.44292	0.33073	-2.24033	1.27108	-0.499229	0.435015	-0.770387	0.428982
	278	-0.144864	0.319048	-1.88473	1.26886	-0.411578	0.433324	-0.399458	0.318367
	280	-0.24101	0.312186	-1.45508	1.11126	-0.314247	0.481306	-0.562913	0.37119
	282	-0.321939	0.287515	-1.44555	1.04334	-0.225111	0.525484	-0.655261	0.408568
	284	-0.432193	0.330189	-0.976164	0.832693	-0.380926	0.528013	-0.568723	0.363731
	286	-0.320974	0.289241	-1.25996	0.899584	-0.419629	0.573891	-0.391503	0.299544
	288	-0.338546	0.316391	-0.917847	0.700447	-0.490524	0.625589	-0.264413	0.311335
	290	-0.271601	0.348572	-0.782674	0.663798	-0.290719	0.607535	-0.159881	0.302549
	292	-0.306965	0.326324	-0.685312	0.713638	-0.30504	0.583484	0.130733	0.341792
	294	-0.451044	0.326541	-0.416289	0.766132	-0.244839	0.551491	0.146816	0.330971
	296	-0.529343	0.306364	-0.575445	0.812311	-0.204774	0.471003	-0.059074	0.260206
	298	-0.702918	0.340701	-0.685275	0.837801	-0.135385	0.468491	-0.160613	0.352375
	300	-0.721284	0.317873	-0.715401	0.904637	0.00712487	0.488852	-0.197687	0.305931
	302	-0.560239	0.281463	-0.861149	0.915026	0.0182289	0.553083	-0.261907	0.221584
	304	-0.342925	0.280177	-1.22113	0.986081	0.172477	0.570365	-0.420709	0.291238
	306	-0.337665	0.336969	-1.10441	0.920136	0.277832	0.569592	-0.678104	0.382833
	308	-0.387928	0.345486	-0.998483	0.887459	0.26851	0.501425	-0.485728	0.396287
	310	-0.174567	0.355726	-0.910623	0.784243	0.171033	0.494293	-0.457027	0.384414
	312	-0.0601823	0.353711	-1.19298	0.684826	0.231083	0.458418	-0.485585	0.428313
	314	-0.325839	0.31522	-0.940068	0.415166	0.10267	0.444122	-0.431353	0.416054
	316	-0.236766	0.385116	-0.581077	0.380117	0.32518	0.523411	-0.544354	0.545299
	318	-0.209168	0.337241	-0.794378	0.408329	0.433855	0.523677	-0.354879	0.463306
	320	-0.301589	0.300912	-0.599909	0.358203	0.407476	0.503429	-0.514676	0.521467
	322	-0.382111	0.313424	-0.53285	0.355955	0.583761	0.463248	-0.647519	0.490008
	324	-0.308062	0.340563	-0.397696	0.392265	0.613179	0.492988	-0.798577	0.454381
	326	-0.125328	0.357482	-0.502321	0.396494	0.585347	0.435258	-0.749759	0.462323
	328	-0.111576	0.372036	-0.383436	0.384814	0.369576	0.520824	-0.643159	0.434942
	330	-0.100839	0.312518	-0.13451	0.366137	0.498156	0.541267	-0.537258	0.383763
	332	-0.145683	0.312973	0.245475	0.321071	0.461078	0.515723	-0.5544	0.371702
	334	-0.194936	0.287861	0.202375	0.369547	0.411127	0.481558	-0.392699	0.329383
	336	-0.291193	0.345479	0.0871455	0.339086	0.377402	0.5063	-0.462157	0.453331
	338	-0.362308	0.429237	-0.0134441	0.438662	0.416293	0.497139	-0.67175	0.58283
	340	-0.298977	0.447955	-0.29696	0.546038	0.214515	0.455563	-0.680132	0.639063
	342	-0.282561	0.452692	-0.300832	0.557874	0.298504	0.518372	-0.565383	0.61869
	344	-0.106367	0.493137	-0.40289	0.607645	0.313742	0.497232	-0.559968	0.568186
	346	-0.318558	0.442156	-0.457337	0.599255	0.477458	0.475782	-0.463447	0.559629
	348	-0.219714	0.413572	-0.426874	0.614951	0.399691	0.469832	-0.384018	0.539647
	350	-0.422146	0.419853	-0.802155	0.534125	0.59872	0.458425	-0.264473	0.479212
	352	-0.553187	0.354814	-0.539703	0.620757	0.542754	0.411078	-0.525882	0.512463
	354	-0.610241	0.349068	-0.968272	0.534855	0.226683	0.380723	-0.415102	0.421302
	356	-0.390737	0.393269	-0.401205	0.583716	0.160222	0.422033	-0.700568	0.403846
	358	-0.400607	0.407638	-0.454425	0.648087	0.0820921	0.39828	-0.643694	0.505318
	360	-0.461565	0.421587	-0.189876	0.582058	0.275741	0.49139	-0.622722	0.591212
	362	-0.266306	0.468061	-0.0988901	0.602021	0.600997	0.490072	-0.594339	0.579604
	364	-0.172121	0.465667	0.385667	0.54153	0.644729	0.349076	-0.121106	0.683092
	366	0.368997	0.434166	0.831297	0.710051	0.943573	0.347896	0.258374	0.602924
	368	0.521817	0.482966	1.24931	0.883224	1.20868	0.301493	0.321219	0.588355
	370	0.667557	0.538081	1.1809	0.903496	1.11955	0.361748	0.198752	0.56855
	372	0.219496	0.438116	1.17204	0.927451	1.022	0.38878	-0.453896	0.538149
	374	0.195374	0.571859	0.0924645	0.556454	1.04713	0.531058	-0.586139	0.507129
	376	-0.49212	0.528436	-0.0454184	0.652956	0.980452	0.556734	-0.331044	0.675806
	378	-0.880514	0.438462	-0.293056	0.642275	0.763921	0.584174	-0.163284	0.607998
	380	-1.21967	0.390251	-0.535017	0.611985	0.165194	0.728978	-0.617915	0.59111
	382	-1.36073	0.309297	-0.796264	0.603359	-0.110675	0.666249	-0.533323	0.52455
	384	-1.36664	0.236347	-0.901591	0.546594	-0.315426	0.677497	-0.464032	0.548525
	386	-1.26471	0.34995	-0.812021	0.610062	-0.374575	0.705455	-0.556157	0.629198
	388	-1.33934	0.376755	-0.907215	0.556136	-0.47723	0.634538	-0.967952	0.621821
	390	-1.38502	0.42082	-1.09059	0.508534	-0.417704	0.625025	-1.13651	0.647269
	392	-1.3642	0.364778	-1.06879	0.503227	-0.475822	0.650368	-1.16486	0.657663
	394	-1.39276	0.375198	-0.879904	0.381853	-0.376299	0.736098	-1.12762	0.617424
	396	-1.21469	0.33548	-1.25285	0.392419	-0.525106	0.685392	-1.24186	0.512643
	398	-1.37522	0.41781	-1.27921	0.427285	-0.295075	0.764753	-1.1431	0.557462
	400	-1.45218	0.456582	-1.38873	0.393432	-0.156645	0.717488	-0.965851	0.476015
	402	-1.53912	0.454474	-1.27196	0.436056	-0.177518	0.69892	-0.971811	0.483627
	404	-1.51946	0.40885	-1.23876	0.463924	-0.360792	0.660996	-0.509848	0.606965
	406	-1.55681	0.396293	-1.05884	0.453707	-0.463745	0.778847	-0.527835	0.613184
	408	-1.60234	0.352635	-1.02055	0.488899	-0.185554	0.637645	-0.565747	0.640444
	410	-1.62319	0.294835	-1.17497	0.541765	-0.483315	0.763715	-0.959602	0.467529
	412	-1.67779	0.286687	-1.19613	0.594047	-0.400499	0.828437	-1.22933	0.359013
	414	-1.89895	0.291916	-1.26826	0.660477	-0.414844	0.761884	-1.34592	0.475932
	416	-1.84246	0.304296	-1.44703	0.601791	-0.626999	0.814273	-1.18717	0.462259
	418	-1.73346	0.394966	-1.54237	0.657366	-0.607365	0.80624	-1.00403	0.45845
	420	-1.78636	0.389703	-1.4407	0.609019	-0.648296	0.776089	-0.987196	0.554981
	422	-1.82109	0.416425	-1.49479	0.529094	-0.890328	0.670903	-0.933171	0.553694
	424	-1.80656	0.45198	-1.47704	0.55215	-1.00993	0.674074	-0.965207	0.529359
	426	-1.86362	0.38232	-1.0802	0.429685	-1.063	0.690495	-1.02702	0.497872
	428	-1.80464	0.319703	-0.996577	0.450325	-1.14299	0.728262	-1.30294	0.486137
	430	-1.86969	0.386127	-1.30415	0.49393	-1.1922	0.739562	-0.899849	0.525986
	432	-1.84275	0.416838	-1.30428	0.575392	-1.12337	0.791957	-0.959787	0.386137
	434	-1.83924	0.417367	-1.36657	0.489543	-1.03809	0.787224	-0.818479	0.407409
	436	-1.93184	0.427574	-1.67874	0.446391	-0.892595	0.798251	-0.744767	0.433315
	438	-1.95375	0.406238	-1.8433	0.428215	-0.811118	0.771914	-0.741884	0.481283
	440	-1.94185	0.416103	-1.75932	0.410828	-0.709396	0.749068	-0.700175	0.487656
	442	-1.99744	0.394998	-1.74377	0.436442	-0.813528	0.720723	-0.652582	0.506045
	444	-2.03532	0.364766	-1.74171	0.504467	-0.780119	0.734577	-0.872073	0.482024
	446	-1.95353	0.386423	-1.84808	0.481029	-0.84695	0.72049	-0.914264	0.49084
	448	-1.91745	0.415192	-2.10447	0.467072	-0.804244	0.673823	-1.08302	0.478947
	450	-1.86435	0.430116	-2.11915	0.472748	-0.994561	0.677056	-1.10835	0.539254
	452	-1.85502	0.427255	-2.18194	0.557315	-1.02796	0.622859	-1.19738	0.535823
	454	-1.93318	0.414171	-2.50139	0.543696	-0.917061	0.654644	-1.4167	0.43297
	456	-2.00697	0.452143	-2.23384	0.609868	-0.986029	0.618766	-1.36586	0.412112
	458	-2.20892	0.521709	-2.21003	0.590035	-0.910125	0.607337	-1.32045	0.320521
	460	-2.14509	0.491014	-2.26632	0.609231	-0.798586	0.546236	-1.02216	0.378897
	462	-2.1537	0.529716	-2.37619	0.533684	-0.888433	0.518922	-1.08554	0.496263
	464	-2.20319	0.471629	-2.40028	0.562958	-0.958966	0.507354	-1.26867	0.557012
	466	-2.05954	0.514732	-2.46829	0.552841	-0.933414	0.564837	-1.44744	0.549603
	468	-1.83618	0.465536	-2.7495	0.633403	-1.07313	0.541678	-1.57347	0.445383
	470	-1.9404	0.505614	-2.80199	0.586504	-1.15507	0.56258	-1.5941	0.422267
	472	-1.65939	0.450492	-2.96104	0.634388	-1.06803	0.521126	-1.45945	0.378693
	474	-1.72479	0.426808	-3.03984	0.605332	-0.950801	0.536757	-1.51244	0.381768
	476	-1.53158	0.396411	-2.87071	0.538723	-0.984942	0.539536	-1.29362	0.398719
	478	-1.84032	0.484253	-2.72633	0.519233	-1.0087	0.610862	-1.31706	0.420861
	480	-1.7215	0.43639	-3.1198	0.655616	-1.10857	0.582461	-1.29964	0.448503
	482	-2.0533	0.516508	-3.01812	0.688811	-1.18015	0.674892	-1.49996	0.538302
	484	-2.45111	0.598044	-3.25104	0.688886	-1.68948	0.899679	-1.84889	0.66717
	486	-2.63595	0.538581	-4.32056	1.0894	-2.27153	1.07609	-1.96112	0.64591
	488	-2.54106	0.486567	-4.25059	1.01185	-2.52997	1.05969	-2.07076	0.630273
	490	-2.47739	0.350164	-4.34467	0.926083	-2.5432	1.04188	-2.5309	0.651564
	492	-2.2354	0.324191	-4.64393	1.10798	-3.00688	0.946985	-2.49141	0.660193
	494	-2.07158	0.29297	-4.33758	1.03253	-2.81195	0.874178	-2.30866	0.684187
	496	-1.94164	0.339132	-3.39895	0.713651	-2.41474	0.713513	-2.2261	0.509587
	498	-1.73146	0.500144	-3.30332	0.77113	-1.55667	0.558187	-1.77986	0.415278
	500	-1.5198	0.521524	-3.21895	0.771502	-1.08084	0.580014	-1.20565	0.418611
	502	-1.49103	0.573715	-3.11523	0.803325	-0.541086	0.526074	-1.14174	0.420625
	504	-1.5257	0.502056	-3.21731	0.832719	-0.521869	0.41449	-1.25981	0.434013
	506	-1.5116	0.434415	-3.27094	0.864659	-0.403489	0.485021	-1.34692	0.46898
	508	-1.33111	0.36211	-2.93244	0.791532	-0.501168	0.467437	-1.18301	0.405103
	510	-1.36117	0.38041	-2.7184	0.789351	-0.425359	0.489852	-1.05772	0.417047
	512	-1.24663	0.366142	-2.9477	0.706364	-0.283475	0.449638	-0.913755	0.420819
	514	-1.22723	0.370045	-2.46319	0.901486	-0.256418	0.524079	-0.925284	0.36538
	516	-1.24952	0.388254	-2.15617	0.861126	-0.389024	0.605077	-1.02739	0.387364
	518	-1.00839	0.368509	-1.79947	0.861714	-0.37539	0.493773	-0.98748	0.413708
	520	-0.905464	0.333869	-1.43268	0.888663	-0.659068	0.496228	-0.929045	0.391506
	522	-1.01128	0.372976	-1.21894	0.988919	-0.708447	0.509836	-0.870651	0.348444
	524	-1.08521	0.292408	-0.857988	1.00217	-0.657418	0.501952	-0.699789	0.442953
	526	-1.13722	0.344458	-0.822884	1.02476	-0.569394	0.507129	-0.922362	0.354076
	528	-1.26403	0.366077	-0.457968	0.894573	-0.737301	0.621298	-1.00102	0.372012
	530	-1.34118	0.382422	-0.431256	0.858946	-0.713854	0.588184	-0.901471	0.60274
	532	-1.177	0.419236	-0.193228	0.768901	-0.432304	0.704922	-0.999635	0.448918
	534	-1.13549	0.449794	-0.0960087	0.740175	-0.671728	0.639827	-1.01385	0.458593
	536	-1.02514	0.51768	-0.0276384	0.639307	-0.520644	0.67444	-0.78101	0.563427
	538	-0.900669	0.500896	0.30774	0.55483	-0.333077	0.530778	-0.647866	0.437815
	540	-0.995448	0.51587	0.562985	0.493518	-0.0493345	0.539315	-0.89354	0.402166
	542	-0.943002	0.479036	0.294452	0.514828	-0.328338	0.836343	-0.961752	0.489194
	544	-0.920012	0.439686	0.180646	0.44087	-0.222226	0.840387	-0.709437	0.53885
	546	-0.985076	0.349126	0.257746	0.474538	-0.233718	0.852665	-0.706372	0.578475
	548	-1.12671	0.295941	0.431626	0.371701	-0.312815	0.86776	-0.747451	0.435721
	550	-0.932624	0.351689	0.210356	0.47312	-0.325916	0.809765	-0.576157	0.477533
	552	-0.697413	0.409742	0.48683	0.469389	-0.188601	0.703339	-0.567353	0.495964
	554	-0.83445	0.454621	0.470869	0.553074	-0.123787	0.664081	-0.577962	0.421517
	556	-0.816694	0.469671	0.367749	0.493112	-0.282351	0.688345	-0.516968	0.439846
	558	-0.898616	0.486315	0.18064	0.557366	-0.383742	0.686881	-0.559833	0.436755
	560	-0.91755	0.490114	0.553569	0.583755	-0.556489	0.794285	-0.464808	0.425676
	562	-0.974609	0.443749	0.749148	0.578457	-0.232674	0.811035	-0.453418	0.427394
	564	-1.0082	0.489273	0.667243	0.489486	-0.340681	0.787144	-0.713741	0.396195
	566	-1.23526	0.451669	0.737011	0.632858	-0.366917	0.80062	-0.751148	0.46815
	568	-1.12637	0.471583	0.781744	0.467579	-0.38117	0.751465	-0.620186	0.382234
	570	-1.09233	0.44577	0.778384	0.551675	-0.303966	0.821049	-0.754368	0.391204
	572	-1.38556	0.529813	0.642116	0.424847	-0.578326	0.799731	-0.578748	0.409217
	574	-0.860096	0.437138	0.826879	0.516657	-0.226115	0.535848	-0.405386	0.408158
	576	-0.950269	0.512277	1.1781	0.548834	0.0681092	0.554907	-0.383186	0.380284
	578	-0.737986	0.462975	1.27718	0.625667	0.0459987	0.44703	-0.476718	0.481195
	580	-0.949697	0.424415	1.23784	0.790181	0.244785	0.535591	-0.280249	0.372876
	582	-0.629396	0.408792	1.23337	0.80191	0.0125935	0.661312	-0.199507	0.386199
	584	-1.0279	0.432258	1.24788	0.777956	0.22179	0.549909	-0.318922	0.419377
	586	-0.932656	0.380021	1.13239	0.729699	0.0780654	0.565343	-0.348326	0.396849
	588	-1.21324	0.391483	1.05097	0.811168	0.114157	0.570695	-0.543846	0.309911
	590	-1.2983	0.282014	0.791514	0.586708	-0.0214295	0.598212	-0.608131	0.325073
	592	-1.46393	0.253318	0.582176	0.70865	0.274118	0.478287	-0.484428	0.293483
	594	-1.58205	0.232914	0.681082	0.823751	-0.274209	0.757582	-0.434839	0.349785
	596	-1.59196	0.216818	0.307585	0.749785	0.0458196	0.652065	-0.681649	0.370695
	598	-1.42294	0.254159	0.190606	0.683727	-0.197846	0.758167	-0.483862	0.356506
	600	-1.48455	0.187992	0.144577	0.604343	-0.068752	0.758014	-0.314273	0.392281
	602	-1.19696	0.25228	0.375445	0.597689	-0.19234	0.809638	-0.0519591	0.639364
	604	-1.04614	0.229653	0.500603	0.521032	0.0851818	0.891697	-0.0310737	0.634669
	606	-1.06125	0.244596	1.40206	0.674074	-0.1164	1.07254	0.0783627	0.614294
	608	-0.917332	0.201967	1.86693	0.659057	-0.203401	1.07004	0.196434	0.648257
	610	-0.904584	0.247203	2.11981	0.652532	-0.70642	0.983657	-0.245329	0.515413
	612	-1.0891	0.324966	1.87257	0.676418	-0.547471	0.752438	-0.16341	0.525815
	614	-1.45547	0.287616	1.31464	0.655963	-0.934245	0.957274	-0.144293	0.757295
	616	-1.69207	0.328045	1.10525	0.762956	-1.09216	1.09278	-0.0546017	0.827674
	618	-1.872	0.317509	0.51884	0.784781	-1.30883	1.25197	-0.180251	0.870207
	620	-1.95488	0.287253	0.273481	0.563578	-1.15124	1.27415	-0.00480001	0.814251
	622	-1.8972	0.312223	-0.343632	0.353488	-1.14405	1.30798	-0.20613	0.745521
	624	-1.92715	0.3408	-0.723197	0.346686	-1.19874	1.2702	-0.654498	0.539852
	626	-1.96966	0.295641	-0.859614	0.420809	-1.3851	1.30636	-0.704373	0.48238
	628	-2.04089	0.257629	-1.11765	0.431014	-1.3299	1.15226	-0.769099	0.498528
	630	-2.09805	0.263359	-1.03915	0.498392	-1.33451	1.07187	-1.00503	0.397827
	632	-2.10454	0.243	-1.01247	0.631394	-1.32767	0.943099	-1.18298	0.371428
	634	-1.83778	0.315062	-1.19558	0.637018	-1.40029	0.924922	-1.21567	0.393388
	636	-1.79368	0.297817	-1.20714	0.676279	-1.49154	0.89754	-1.21815	0.397424
	638	-1.87487	0.314711	-1.26938	0.679127	-1.59984	1.02956	-1.14864	0.449092
	640	-1.80308	0.340485	-1.16734	0.591985	-1.8282	1.03142	-1.26029	0.462408
	642	-2.00422	0.306856	-1.15801	0.584966	-1.77535	1.01558	-1.15938	0.450005
	644	-1.8774	0.310118	-1.28738	0.58842	-1.85124	1.03279	-0.834062	0.488938
	646	-1.84143	0.309373	-1.40747	0.506248	-1.88402	1.07433	-1.07358	0.463371
	648	-1.74674	0.280896	-1.42985	0.521213	-1.4863	0.835115	-1.02789	0.500829
	650	-1.70443	0.270229	-1.70894	0.469228	-1.7026	1.12454	-1.05004	0.552574
	652	-1.7354	0.301321	-1.79969	0.423333	-1.87349	1.10175	-1.12903	0.567479
	654	-1.72484	0.277361	-1.80527	0.395109	-1.77644	1.05908	-1.22616	0.537372
	656	-1.86305	0.325311	-1.92909	0.390052	-1.47586	0.808295	-1.21008	0.564691
	658	-1.72828	0.254535	-2.05997	0.404652	-1.89862	1.04239	-1.45787	0.613873
	660	-1.84718	0.311376	-2.03012	0.426431	-1.78116	1.03603	-1.25454	0.599657
	662	-1.96147	0.318275	-2.06484	0.431759	-1.74646	1.06512	-0.988465	0.499378
	664	-1.95236	0.399519	-2.09802	0.511932	-1.55176	0.893372	-1.01497	0.46327
	666	-1.79642	0.275649	-1.84072	0.486052	-1.55401	0.861697	-0.968658	0.506803
	668	-1.99534	0.365254	-2.19008	0.469489	-1.50629	0.801644	-0.835504	0.522988
	670	-2.16901	0.326531	-2.19265	0.469226	-1.62844	0.870099	-0.981787	0.601174
	672	-2.08772	0.316075	-2.33679	0.450165	-1.61462	0.811751	-0.970557	0.701234
	674	-2.1166	0.361454	-2.34204	0.460925	-1.60646	0.799387	-1.11858	0.61171
	676	-2.25412	0.388816	-2.50485	0.42682	-1.71887	0.904101	-1.30555	0.556927
	678	-2.00284	0.388022	-2.40867	0.47292	-1.65678	0.84367	-1.11631	0.53464
	680	-1.97789	0.361334	-2.69247	0.581138	-1.7379	0.821208	-1.02152	0.479785
	682	-1.92707	0.333778	-2.69028	0.415048	-1.71682	0.810252	-1.01474	0.45208
	684	-1.81343	0.340514	-2.66055	0.480091	-2.00481	0.87389	-1.01636	0.460812
	686	-1.9863	0.355078	-2.18068	0.519264	-1.87027	0.892375	-1.06389	0.460683
	688	-1.93216	0.305891	-2.42151	0.438816	-2.3851	1.25477	-0.977435	0.37773
	690	-1.93201	0.336002	-2.13811	0.391019	-2.25426	1.24211	-1.06429	0.364693
	692	-1.97487	0.375276	-2.30094	0.626222	-2.39971	1.27712	-1.21695	0.42538
	694	-2.05227	0.388039	-2.45454	0.566802	-2.35601	1.28427	-1.25198	0.47194
	696	-2.1121	0.435761	-2.95205	0.511305	-2.43812	1.27072	-1.57174	0.457637
	698	-2.16802	0.49298	-2.85648	0.602577	-2.46089	1.45996	-1.59516	0.500119
	700	-2.0132	0.492608	-3.00106	0.454541	-2.42263	1.47855	-1.53774	0.434412
	702	-1.94234	0.4167	-2.76156	0.351732	-2.13972	1.34592	-1.41744	0.436759
	704	-2.06601	0.408791	-2.51705	0.428558	-1.72433	1.24324	-1.70733	0.41476
	706	-1.90286	0.383414	-2.24919	0.606117	-1.78802	1.1533	-1.47286	0.481975
	708	-1.96055	0.391573	-2.249	0.615108	-1.75145	1.07393	-1.47469	0.510532
	710	-2.00244	0.355873	-2.34578	0.503899	-1.85206	1.05184	-1.36421	0.491622
	712	-2.07749	0.389513	-2.79903	0.591303	-1.89535	1.06835	-1.85311	0.404128
	714	-2.10783	0.412873	-2.8763	0.538728	-1.88136	1.07808	-1.36876	0.430884
	716	-2.07051	0.378411	-2.71524	0.6231	-2.19354	1.32203	-1.61741	0.373581
	718	-2.1937	0.348895	-3.01155	0.497742	-2.22542	1.3409	-1.55206	0.472348
	720	-2.42733	0.440888	-2.59047	0.46015	-2.4332	1.45935	-1.51571	0.454538
	722	-2.3826	0.44845	-2.3563	0.44836	-2.44401	1.34821	-1.68193	0.418821
	724	-2.42196	0.406052	-2.91917	0.46887	-3.03017	1.44577	-2.07371	0.351053
	726	-2.63257	0.521865	-3.40913	0.65029	-3.40194	1.34627	-2.06638	0.38642
	728	-2.71821	0.569164	-3.64348	0.763051	-4.04628	1.41596	-2.06116	0.319686
	730	-2.62771	0.568061	-4.45888	1.00885	-4.1315	1.51305	-2.18105	0.304976
	732	-2.42447	0.655685	-4.51095	1.07803	-3.941	1.49484	-1.98193	0.330864
	734	-2.34785	0.660295	-4.16212	1.09712	-3.33622	1.27808	-1.83633	0.377692
	736	-1.9274	0.524689	-3.6148	0.937805	-2.30432	1.00766	-1.77882	0.324284
	738	-1.48868	0.357183	-3.16474	0.852506	-1.93603	0.918426	-1.40213	0.297635
	740	-1.42928	0.368536	-3.0587	0.870888	-1.79255	0.886825	-1.3152	0.315024
	742	-1.37696	0.35607	-2.95263	0.831185	-1.72476	0.842703	-1.33735	0.338881
	744	-1.45571	0.365484	-3.00479	0.864496	-1.70615	0.873261	-1.29084	0.308738
	746	-1.46639	0.430666	-3.26595	0.952233	-1.59074	0.896657	-1.41604	0.30519
	748	-1.78936	0.420162	-3.38576	0.985898	-1.56936	0.973801	-1.34814	0.340598
	750	-1.4908	0.422738	-3.47938	1.12142	-1.74267	0.9359	-1.04991	0.38694
	752	-1.54602	0.463762	-3.53866	1.30386	-1.70665	0.939463	-0.975058	0.390073
	754	-1.3175	0.459859	-3.51229	1.44735	-1.46112	0.832506	-0.910752	0.487612
	756	-1.33587	0.490068	-3.44513	1.43377	-1.24042	0.854052	-0.757334	0.571081
	758	-0.783649	0.516701	-3.40127	1.56076	-1.18593	0.865726	-0.726727	0.592173
	760	-0.851556	0.505577	-3.0038	1.63826	-1.25803	0.98294	-1.05645	0.476027
	762	-0.756441	0.533369	-2.55209	1.34272	-1.2321	1.0237	-1.11591	0.422439
	764	-0.791809	0.588788	-2.30661	1.03584	-1.17052	1.05328	-1.18333	0.386571
	766	-0.739785	0.590907	-1.83971	0.954762	-1.26181	1.18368	-1.29929	0.386447
	768	-0.804251	0.558092	-1.79366	0.914489	-1.28002	1.15677	-1.26713	0.355804
	770	-0.96432	0.502191	-1.68074	0.87293	-1.53914	1.16486	-1.15293	0.555892
	772	-0.89441	0.496438	-1.43981	0.856569	-1.69167	1.35921	-1.10453	0.577732
	774	-0.98731	0.471432	-0.975292	0.685961	-1.94375	1.32983	-1.18626	0.64965
	776	-0.950273	0.512104	-1.1312	0.781947	-1.99278	1.33069	-0.845953	0.608842
	778	-0.971124	0.524271	-0.549366	0.800579	-2.18214	1.29849	-1.10245	0.621152
	780	-1.13308	0.569191	-0.566947	0.808083	-2.03269	1.29759	-1.01931	0.547604
	782	-1.21782	0.607338	-0.249387	0.721636	-1.77756	1.30419	-0.922269	0.577028
	784	-0.870111	0.581558	-0.0399458	0.724668	-1.55363	1.33002	-0.859328	0.500109
	786	-0.872625	0.496109	0.0403157	0.633546	-1.55999	1.32876	-0.889058	0.509817
	788	-0.822797	0.591473	0.26172	0.573949	-1.21587	1.37085	-0.990522	0.462096
	790	-0.698358	0.520043	0.28978	0.499554	-0.890332	0.943456	-0.819987	0.304187
	792	-0.741541	0.539104	0.395661	0.587427	-1.11151	1.10878	-0.782599	0.22252
	794	-0.930205	0.504742	0.283074	0.520357	-1.15143	0.919652	-1.0874	0.321711
	796	-1.08156	0.465997	0.222673	0.475343	-1.03638	0.942608	-1.21935	0.354388
	798	-1.12909	0.40907	0.274256	0.481484	-1.28446	1.07243	-1.08643	0.41986
	800	-1.1709	0.409508	0.459208	0.542737	-1.56753	1.41725	-1.03647	0.43527
	802	-1.1649	0.369734	0.472633	0.525681	-1.58938	1.412	-1.0187	0.381597
	804	-1.25078	0.328617	0.451674	0.577415	-1.53252	1.42379	-1.09365	0.432253
	806	-1.16406	0.32004	0.566676	0.565416	-1.02466	0.823648	-0.842416	0.408631
	808	-1.16569	0.309546	0.6318	0.457242	-1.11288	0.835936	-0.763866	0.361141
	810	-1.12369	0.339173	0.531335	0.406869	-1.25536	0.697996	-0.796216	0.344952
	812	-1.18659	0.40073	0.608953	0.456815	-0.962611	0.525349	-0.649902	0.366916
	814	-1.2146	0.375613	0.828432	0.442297	-1.14146	0.797053	-0.603771	0.270012
	816	-1.26262	0.39437	0.858175	0.489574	-1.31067	0.900281	-0.677199	0.222852
	818	-1.35578	0.416148	0.898818	0.546966	-0.437067	0.494082	-0.89544	0.230513
	820	-1.09939	0.434207	1.03941	0.576451	-0.750403	0.79467	-1.08712	0.296022
	822	-0.891456	0.383754	1.14	0.517876	-0.784364	0.810565	-1.27393	0.317719
	824	-0.844724	0.349686	1.06241	0.489879	-0.515102	0.608472	-1.31829	0.376524
	826	-0.918752	0.289419	1.29877	0.517939	-0.504895	0.609313	-1.41687	0.408483
	828	-1.02443	0.282304	1.43987	0.496144	-0.71691	0.542156	-1.44327	0.444656
	830	-1.24979	0.276497	1.43625	0.538107	-0.598778	0.538702	-0.998907	0.420659
	832	-1.32176	0.333931	1.40772	0.558591	-0.454783	0.562599	-1.03935	0.388689
	834	-1.32002	0.382711	1.41466	0.569637	-0.584441	0.653674	-0.900774	0.411201
	836	-1.21323	0.443718	1.53071	0.551153	-0.511134	0.682107	-0.912199	0.399946
	838	-1.23554	0.390246	1.60091	0.564899	-0.80819	0.804445	-0.887155	0.287891
	840	-1.32368	0.374641	1.69721	0.496017	-0.987903	0.803287	-0.889847	0.340796
	842	-1.17513	0.324224	1.71283	0.50729	-0.860414	0.793499	-0.948523	0.37774
	844	-1.20708	0.313465	1.7859	0.583911	-0.41472	0.517624	-0.917107	0.288124
	846	-1.22642	0.312127	1.62629	0.401289	-0.656701	0.53972	-0.972856	0.289485
	848	-1.41279	0.361456	1.65236	0.424581	-0.688784	0.504266	-1.25521	0.31308
	850	-1.20786	0.354509	1.69294	0.421298	-0.472307	0.518782	-1.29017	0.281286
	852	-1.23672	0.369973	1.70861	0.416053	-0.646085	0.496916	-1.27453	0.250683
	854	-1.3071	0.33374	1.76866	0.406313	-0.715061	0.510591	-1.16469	0.274451
	856	-1.11351	0.363291	1.52444	0.440633	-1.09417	0.601751	-1.19051	0.261394
	858	-1.14648	0.386973	1.47497	0.513772	-1.15788	0.712138	-1.00455	0.198631
	860	-1.06188	0.400663	1.52147	0.508426	-1.26976	0.678625	-1.02368	0.356526
	862	-0.915681	0.392205	1.59233	0.524935	-1.35253	0.787307	-1.32077	0.348288
	864	-0.749137	0.380409	1.47621	0.528139	-1.76446	1.22193	-1.25195	0.286814
	866	-0.943844	0.401897	1.7959	0.541886	-1.38532	0.806073	-1.37193	0.425113
	868	-1.00189	0.403466	1.75794	0.528134	-1.29907	0.720512	-1.09117	0.357337
	870	-0.938503	0.333129	1.70554	0.508246	-1.18021	0.72656	-1.35875	0.358716
	872	-1.16491	0.345363	1.73082	0.538587	-1.02001	0.613787	-1.26547	0.369496
	874	-1.1593	0.31495	1.71934	0.592694	-1.1749	0.611642	-1.1168	0.416273
	876	-1.05111	0.344478	1.62194	0.65118	-1.09381	0.617761	-1.28196	0.412328
	878	-0.935347	0.337245	1.66394	0.666443	-1.06075	0.606115	-1.31262	0.405252
	880	-0.982999	0.341072	1.94186	0.5685	-1.09569	0.616017	-1.23857	0.455168
	882	-0.839163	0.306882	1.98638	0.560215	-1.32432	0.697008	-1.17501	0.361738
	884	-1.02349	0.305394	1.74688	0.44583	-0.980123	0.583769	-1.05263	0.248846
	886	-0.914145	0.304734	1.82148	0.456288	-0.80709	0.624477	-1.07079	0.242174
	888	-1.07154	0.316969	1.9115	0.36935	-0.862991	0.655056	-0.805349	0.384745
	890	-1.1438	0.329511	1.7311	0.386585	-0.785512	0.640907	-0.721222	0.40503
	892	-1.12208	0.382238	1.98251	0.494188	-0.675566	0.660991	-0.831619	0.470783
	894	-0.950133	0.412287	2.18022	0.451591	-0.848262	0.662332	-0.712344	0.444829
	896	-1.13089	0.420315	2.14092	0.50701	-0.89569	0.667685	-0.790964	0.426658
	898	-1.02711	0.431817	2.24783	0.558083	-0.763169	0.672159	-1.24653	0.314045
	900	-1.10329	0.387675	2.22752	0.62657	-1.03986	0.651267	-1.21312	0.292104
	902	-1.1116	0.345169	1.87317	0.553254	-0.997656	0.647259	-1.35241	0.285101
	904	-0.961778	0.289889	1.83369	0.518742	-1.05473	0.690416	-1.48227	0.313804
	906	-1.12452	0.332398	1.94684	0.458483	-1.22224	0.645664	-1.44368	0.343057
	908	-1.2032	0.299973	1.94847	0.427997	-1.22631	0.656849	-1.56943	0.258543
	910	-1.26724	0.356681	1.79078	0.391655	-0.953945	0.711768	-1.47405	0.241891
	912	-1.33209	0.359277	2.09719	0.407306	-1.20296	0.820352	-1.39636	0.300449
	914	-1.33169	0.347276	2.11296	0.376583	-1.15328	0.800061	-1.14984	0.275589
	916	-1.20483	0.387347	2.05633	0.500837	-0.989337	0.663713	-1.0159	0.288246
	918	-1.1312	0.377207	2.25574	0.48746	-0.987651	0.668385	-1.05229	0.421695
	920	-0.935466	0.381955	2.17962	0.512582	-0.944855	0.658579	-1.09332	0.416502
	922	-0.84791	0.356032	2.02932	0.488312	-0.970406	0.65425	-0.932374	0.418944
	924	-0.675504	0.411375	1.83767	0.530886	-0.999148	0.712013	-0.866137	0.46669
	926	-0.629696	0.43005	2.04101	0.554036	-1.12523	0.734568	-0.912604	0.505939
	928	-0.782404	0.425541	1.85548	0.473234	-1.14096	0.736677	-0.922415	0.424325
	930	-0.881922	0.388926	2.15009	0.535072	-0.991526	0.78664	-0.530437	0.414096
	932	-0.833986	0.369042	2.14097	0.554762	-0.976238	0.75944	-0.397364	0.371889
	934	-1.02251	0.322962	2.00982	0.540273	-0.943327	0.603843	-0.635623	0.350369
	936	-0.992163	0.323198	1.76236	0.406911	-0.66866	0.579259	-0.879877	0.370515
	938	-1.01443	0.283521	1.93218	0.469897	-0.497514	0.594196	-0.942116	0.287891
	940	-1.14213	0.34387	1.95382	0.396713	-0.512811	0.579151	-0.930942	0.330984
	942	-1.05718	0.290868	2.0504	0.44379	-0.313804	0.459813	-0.997603	0.296065
	944	-0.993727	0.315743	2.25564	0.454283	-0.54178	0.373545	-0.906928	0.288164
	946	-0.928484	0.32792	2.16285	0.623561	-0.953827	0.691599	-0.97684	0.283291
	948	-0.922026	0.298616	2.32279	0.70656	-0.85062	0.70842	-1.12122	0.366585
	950	-0.754117	0.313112	2.2251	0.629507	-0.803786	0.604672	-1.12641	0.372045
	952	-0.83147	0.332639	2.23379	0.534382	-0.857493	0.65472	-1.00108	0.512269
	954	-0.875661	0.276169	2.10245	0.455113	-0.708023	0.464476	-1.06736	0.505333
	956	-0.77753	0.271443	2.10944	0.44465	-0.754081	0.471823	-1.00476	0.477365
	958	-0.95344	0.283731	2.08625	0.4366	-0.793347	0.39316	-1.10343	0.383327
	960	-0.858988	0.390967	2.08601	0.412822	-1.08079	0.416501	-1.24126	0.454517
	962	-1.07236	0.37037	2.23312	0.418897	-0.891876	0.381003	-1.38594	0.298691
	964	-1.15125	0.387022	2.21939	0.405864	-0.716763	0.400003	-1.43791	0.265982
	966	-1.10844	0.358898	2.18209	0.471822	-0.61928	0.355715	-1.59879	0.3141
	968	-1.1478	0.35723	2.17043	0.446152	-0.741119	0.354078	-1.48104	0.370589
	970	-0.944547	0.376122	2.15966	0.424408	-0.505578	0.429886	-1.44954	0.319458
	972	-1.18668	0.386634	2.10073	0.405861	-0.343338	0.485259	-1.38991	0.326112
	974	-1.26354	0.437942	2.15689	0.388053	-0.529704	0.504403	-1.22052	0.333598
	976	-1.13452	0.445189	2.04974	0.408381	-0.782762	0.645173	-1.1729	0.295654
	978	-1.04888	0.36768	2.08016	0.480125	-0.657131	0.641256	-1.35855	0.269608
	980	-0.995452	0.350742	2.03801	0.475204	-0.5623	0.609466	-1.19487	0.181602
	982	-0.799277	0.330316	1.78739	0.631294	-0.690609	0.586746	-0.967965	0.234534
	984	-0.773794	0.291384	1.85841	0.54621	-1.03629	0.608375	-1.24955	0.227081
	986	-0.903041	0.306817	1.79929	0.496547	-0.972257	0.602667	-1.18571	0.260428
	988	-1.17749	0.426233	1.78892	0.498064	-0.966156	0.627795	-0.974348	0.373465
	990	-1.24942	0.433554	1.88637	0.411878	-0.875434	0.465578	-1.10109	0.370701
	992	-1.27286	0.392853	1.98897	0.389387	-0.809547	0.440425	-1.29747	0.39284
	994	-1.08472	0.311199	1.93182	0.387891	-0.80282	0.414638	-1.22491	0.370178
	996	-0.99711	0.382304	1.93998	0.367078	-1.2169	0.632051	-1.18008	0.400724
	998	-1.00094	0.288973	2.04764	0.444906	-1.1238	0.658012	-1.18096	0.301853
	1000	-1.07105	0.307517	2.20149	0.510402	-1.04936	0.668179	-1.18276	0.309852
	1002	-1.22271	0.324524	1.99836	0.49434	-1.209	0.648059	-1.19672	0.315989
	1004	-1.09854	0.365672	1.90368	0.547578	-1.03755	0.447303	-1.19189	0.325196
	1006	-1.26607	0.263776	1.94314	0.453483	-1.01503	0.487589	-1.18642	0.373006
	1008	-1.42169	0.248777	1.95963	0.463275	-1.06457	0.460617	-1.2582	0.367714
	1010	-1.21894	0.334257	2.05542	0.453733	-1.19998	0.533609	-1.17851	0.392954
	1012	-1.25478	0.32244	2.00333	0.455921	-1.17286	0.534638	-1.00704	0.352624
	1014	-1.30093	0.313905	2.17222	0.426297	-1.20448	0.54198	-0.912569	0.341228
	1016	-1.36377	0.321449	2.2104	0.483922	-1.13102	0.538623	-1.01648	0.287696
	1018	-1.05001	0.350341	2.25115	0.463724	-1.01107	0.516229	-1.10972	0.211615
	1020	-0.957267	0.26341	2.19866	0.534973	-1.0067	0.51571	-0.964672	0.232703
	1022	-0.813974	0.26173	2.43884	0.627012	-1.15787	0.502923	-0.97654	0.212559
	1024	-0.967049	0.293282	2.26937	0.645977	-1.15782	0.57737	-1.39235	0.268065
	1026	-1.00606	0.332955	2.57295	0.665942	-1.20962	0.572745	-1.28042	0.295928
	1028	-1.27003	0.329772	2.14032	0.736042	-1.2136	0.652394	-1.2329	0.480606
	1030	-1.48411	0.383034	1.91072	0.761933	-1.06081	0.61035	-1.26485	0.46151
	1032	-1.47779	0.445145	2.16744	0.697852	-0.934921	0.640538	-1.32243	0.411978
	1034	-1.48342	0.448505	1.87588	0.654479	-1.00716	0.482819	-1.27597	0.425392
	1036	-1.38991	0.433825	2.0246	0.707865	-1.02786	0.51937	-1.16829	0.380116
	1038	-1.51658	0.497386	2.13058	0.662732	-0.98281	0.519915	-1.17025	0.379405
	1040	-1.49376	0.469691	2.18506	0.673519	-0.948577	0.516873	-1.24664	0.46669
	1042	-1.43911	0.450057	1.91856	0.601736	-1.07009	0.531471	-1.06671	0.384584
	1044	-1.43758	0.490767	2.09758	0.574592	-1.16844	0.639029	-1.18522	0.414125
	1046	-1.45584	0.456131	2.30242	0.601994	-1.17584	0.61311	-1.13101	0.408457
	1048	-1.28037	0.425688	2.27425	0.637705	-1.06504	0.467559	-1.07893	0.402726
	1050	-1.19368	0.426692	2.38946	0.614505	-0.862215	0.439569	-0.93561	0.380691
	1052	-0.875915	0.406959	2.57226	0.59021	-0.779673	0.464911	-1.15592	0.328864
	1054	-1.10348	0.319011	2.64231	0.633849	-0.703417	0.508637	-0.998238	0.34614
	1056	-1.12055	0.288369	2.53517	0.574557	-0.849789	0.629771	-0.977395	0.417729
	1058	-1.0511	0.278762	2.40494	0.587311	-1.08156	0.58032	-1.06304	0.48995
	1060	-0.926202	0.257958	2.38373	0.568585	-0.716036	0.722948	-1.13884	0.479918
	1062	-0.97233	0.233408	2.11337	0.643736	-0.790512	0.689253	-1.08143	0.441169
	1064	-0.950248	0.347526	2.25174	0.604848	-0.795508	0.558812	-1.1121	0.467965
	1066	-0.887934	0.367524	2.21389	0.657231	-0.932338	0.529629	-1.13521	0.446777
	1068	-1.08069	0.407902	2.21412	0.724746	-1.18165	0.625529	-1.10766	0.434392
	1070	-1.09984	0.400556	2.1536	0.776049	-1.13422	0.533463	-1.33087	0.37717
	1072	-1.15992	0.370094	2.20559	0.777068	-1.05473	0.669758	-1.16659	0.412421
	1074	-1.20683	0.371611	2.29105	0.76464	-1.09522	0.683027	-1.16747	0.371179
	1076	-1.09741	0.361742	2.31616	0.6746	-1.07542	0.6963	-1.1853	0.346078
	1078	-1.16976	0.400765	2.07015	0.653265	-0.961786	0.680985	-1.33336	0.400756
	1080	-1.21038	0.382839	2.36208	0.700711	-0.984213	0.657519	-0.982623	0.399272
	1082	-1.33431	0.382329	2.45974	0.705825	-0.99958	0.556625	-0.89583	0.391988
	1084	-1.30133	0.326883	2.38745	0.733794	-1.19409	0.881877	-1.27418	0.419175
	1086	-1.36886	0.363131	2.32585	0.789102	-1.44545	1.02583	-1.28142	0.402557
	1088	-1.27288	0.342386	2.25652	0.760252	-0.951409	0.677725	-1.16092	0.400628
	1090	-1.3528	0.392723	2.22014	0.77181	-1.01291	0.744194	-1.17422	0.35169
	1092	-1.18234	0.382122	1.55506	0.824451	-1.01723	0.85663	-1.28552	0.38789
	1094	-1.26938	0.409007	2.22116	0.766014	-1.09643	0.757095	-1.19369	0.289427
	1096	-1.36185	0.427614	2.21345	0.732738	-0.971238	0.748773	-1.08615	0.472583
	1098	-1.38504	0.440932	2.1863	0.819534	-0.912389	0.747583	-1.1647	0.265482
	1100	-1.31952	0.419839	2.21772	0.834493	-0.606541	0.67474	-1.1629	0.304099
	1102	-1.07697	0.415719	2.38201	0.778587	-0.80066	0.620314	-0.975265	0.270663
	1104	-1.21877	0.422649	2.3048	0.69613	-0.926903	0.613008	-1.00492	0.220942
	1106	-1.25205	0.375368	2.12653	0.746612	-1.07885	0.600689	-1.00996	0.231339
	1108	-1.10443	0.440134	2.15654	0.73725	-1.19565	0.608837	-0.937724	0.238125
	1110	-1.12521	0.451208	2.07853	0.736657	-1.06542	0.643716	-1.08427	0.315775
	1112	-1.2415	0.450298	1.9853	0.678633	-1.01162	0.647533	-1.03136	0.342693
	1114	-1.14127	0.407469	2.14947	0.761441	-0.487032	0.70175	-1.13388	0.36586
	1116	-1.19812	0.40412	1.93224	0.639795	-0.521792	0.688517	-1.07825	0.349887
	1118	-1.28582	0.440437	2.29385	0.714556	-0.647975	0.681801	-1.27553	0.333323
	1120	-1.3111	0.44579	1.72231	0.791951	-0.679987	0.524393	-1.26223	0.309882
	1122	-1.2372	0.46553	1.67719	0.785658	-0.702956	0.668167	-1.16699	0.360599
	1124	-1.35474	0.432302	1.73069	0.775843	-0.750988	0.711885	-1.26796	0.361031
	1126	-1.52415	0.396514	1.66372	0.770713	-0.997352	0.816669	-1.20783	0.291521
	1128	-1.56987	0.388632	1.68579	0.757345	-1.30717	1.02152	-0.853686	0.343555
	1130	-1.49575	0.339813	1.91466	0.834222	-1.27135	1.02304	-0.930981	0.397597
	1132	-1.50534	0.371547	1.96269	0.777206	-1.15689	0.798954	-0.84122	0.384284
	1134	-1.19734	0.385173	1.81684	0.760657	-1.17208	0.755517	-0.762674	0.383196
	1136	-1.39745	0.369759	1.87606	0.810302	-0.927901	0.658167	-0.881513	0.263198
	1138	-1.28816	0.369007	2.02612	0.834436	-0.841811	0.642063	-0.867585	0.28052
	1140	-1.2225	0.34421	1.80437	0.808602	-0.934004	0.63536	-0.949621	0.294611
	1142	-1.25121	0.356525	1.62443	0.826917	-0.962408	0.668439	-1.10658	0.359635
	1144	-1.46252	0.360181	1.80082	0.826914	-1.21294	0.74631	-1.20525	0.385923
	1146	-1.56759	0.361169	1.86902	0.822866	-1.27435	0.759405	-1.24044	0.381889
	1148	-1.51406	0.401944	1.80604	0.794255	-1.31713	0.83514	-1.44251	0.340796
	1150	-1.58147	0.393631	1.77763	0.790892	-1.28707	0.81193	-1.50766	0.358058
	1152	-1.49959	0.381807	1.71984	0.802877	-1.23935	0.736953	-1.42885	0.249024
	1154	-1.30627	0.362948	1.63448	0.8583	-0.9012	0.440298	-1.4654	0.242616
	1156	-1.28985	0.380531	1.63734	0.854907	-1.07935	0.510193	-1.29557	0.282717
	1158	-1.43074	0.292524	1.94329	0.893655	-0.904183	0.428067	-1.34751	0.39356
	1160	-1.33892	0.309301	1.95118	0.873692	-0.90286	0.463051	-1.34182	0.363723
	1162	-1.36613	0.297105	2.17305	0.915252	-0.9588	0.527832	-0.93904	0.374374
	1164	-1.34251	0.300734	2.38235	0.980584	-0.803645	0.514638	-1.0822	0.381236
	1166	-1.17201	0.30962	2.31541	0.889094	-0.668674	0.54927	-0.884974	0.351839
	1168	-1.43522	0.318057	2.1252	0.905091	-0.631354	0.549662	-0.946348	0.261427
	1170	-1.15888	0.322282	2.03922	0.972319	-0.638603	0.610093	-1.00067	0.281032
	1172	-1.31727	0.286765	1.8384	0.971742	-0.685435	0.547128	-1.07895	0.244532
	1174	-1.24722	0.270161	1.82995	0.945526	-0.711151	0.626863	-1.12945	0.245527
	1176	-1.38905	0.317583	2.03789	0.978762	-0.60272	0.562622	-1.21019	0.315486
	1178	-1.31083	0.308594	1.64536	1.00553	-0.737399	0.536087	-1.32216	0.340006
	1180	-1.4461	0.286472	1.72045	0.918775	-0.8241	0.543154	-1.6519	0.375018
	1182	-1.45835	0.312881	1.90813	0.902546	-0.776834	0.533456	-1.54532	0.347682
	1184	-1.63838	0.385473	1.65547	0.922775	-0.888612	0.639755	-1.40869	0.357074
	1186	-1.398	0.311349	1.56897	0.933738	-0.961983	0.656288	-1.26988	0.396364
	1188	-1.41233	0.324487	1.97815	0.919078	-1.00263	0.655877	-1.29068	0.416057
	1190	-1.18215	0.329658	1.693	0.884703	-1.01944	0.592343	-1.16978	0.389254
	1192	-1.1757	0.340823	1.74898	0.851821	-1.35471	0.811849	-1.17206	0.392402
	1194	-1.14917	0.325735	1.85577	0.859435	-1.17182	0.84039	-1.30161	0.391125
	1196	-1.37763	0.310786	1.59379	0.88151	-1.2757	0.855518	-1.38525	0.495828
	1198	-1.14293	0.312344	1.38031	0.846686	-1.21883	0.821374	-1.48336	0.353923
	1200	-1.44114	0.271357	1.57402	0.886814	-1.15022	0.834982	-1.48566	0.363372
	1202	-1.4792	0.349307	1.56959	0.930162	-1.03423	0.885567	-1.44413	0.498004
	1204	-1.3993	0.340982	1.59316	0.961706	-1.29781	0.76286	-1.56717	0.500608
	1206	-1.52621	0.370636	1.38608	0.834027	-0.940424	0.62603	-1.73331	0.420581
	1208	-1.56875	0.4135	1.54114	0.909538	-0.969274	0.666202	-1.71761	0.424932
	1210	-1.48594	0.419429	1.73692	0.922667	-0.918961	0.73779	-1.8995	0.460582
	1212	-1.33678	0.392552	1.80752	0.915092	-1.13832	0.773669	-1.83551	0.350503
	1214	-1.429	0.374893	1.72	0.959894	-0.946489	0.792148	-1.59946	0.370177
	1216	-1.15404	0.357078	1.82634	1.00502	-1.09997	0.850511	-1.40211	0.319122
	1218	-1.4256	0.389407	1.76622	0.925983	-1.12139	0.750067	-1.31362	0.363077
	1220	-1.18211	0.36103	1.493	0.926715	-1.25533	0.778156	-1.29233	0.344919
	1222	-1.3388	0.302073	1.79406	0.986932	-0.958741	0.618893	-1.13741	0.369014
	1224	-1.24933	0.315184	1.65751	0.986575	-0.846536	0.617674	-1.05132	0.385139
	1226	-1.34846	0.32462	1.6383	1.08431	-1.04558	0.70339	-0.92706	0.381812
	1228	-1.34661	0.292298	1.51457	1.00024	-1.09641	0.671327	-0.878969	0.392966
	1230	-1.38086	0.308798	2.03716	1.06747	-0.714979	0.586685	-1.08731	0.530889
	1232	-1.48347	0.326551	1.52679	1.00807	-0.690853	0.550093	-1.12785	0.422399
	1234	-1.36129	0.312754	1.94306	1.07065	-0.670408	0.555947	-1.03065	0.275412
	1236	-1.72148	0.427674	1.8251	1.06381	-0.96865	0.533742	-1.11904	0.4026
	1238	-1.73694	0.43798	2.06688	1.14233	-0.95402	0.573741	-1.31423	0.471768
	1240	-1.64106	0.47549	1.87702	1.1254	-0.868523	0.635126	-1.02342	0.457317
	1242	-1.45586	0.409332	1.98274	1.15528	-1.30806	0.786913	-1.24841	0.397086
	1244	-1.19887	0.340137	1.60228	1.04547	-1.1071	0.652091	-1.47855	0.514747
	1246	-1.05133	0.281979	1.54612	0.969113	-0.864959	0.74806	-1.5218	0.370894
	1248	-1.09314	0.243102	1.54477	0.963235	-0.924958	0.73735	-1.48518	0.215402
	1250	-1.21262	0.258275	1.33073	0.849534	-0.877302	0.626474	-1.62746	0.320988
	1252	-1.25207	0.249624	1.37132	0.88621	-0.653675	0.663608	-1.76752	0.366813
	1254	-1.45926	0.293598	1.32169	1.02233	-0.698878	0.725328	-1.51387	0.191515
	1256	-1.63939	0.332119	1.36262	1.10119	-0.717553	0.865487	-1.46198	0.263007
	1258	-1.6106	0.342445	1.15385	1.10562	-0.804799	0.840777	-1.20777	0.35788
	1260	-1.48444	0.399393	1.13092	1.11301	-0.882684	0.828499	-1.0342	0.366627
	1262	-1.76336	0.385248	0.874643	1.09362	-0.933812	0.852029	-0.931625	0.26795
	1264	-1.61292	0.405793	0.841775	1.0049	-0.973909	0.739633	-0.920894	0.343579
	1266	-1.72296	0.393166	0.754245	1.04618	-0.924065	0.697762	-1.0832	0.41469
	1268	-1.74797	0.422695	1.00057	0.906185	-0.936388	0.813053	-1.09535	0.488578
	1270	-1.56187	0.411383	0.948971	0.945293	-0.939961	0.806569	-1.44161	0.518789
	1272	-1.17674	0.403217	0.885735	0.918223	-0.954182	0.719269	-1.24569	0.527907
	1274	-1.33037	0.360705	0.86265	0.982261	-1.00835	0.659032	-1.42079	0.553783
	1276	-1.199	0.354488	0.629187	0.922903	-0.870873	0.508641	-1.62042	0.473903
	1278	-0.908822	0.458471	0.639909	1.08348	-0.901174	0.469134	-1.49117	0.416901
	1280	-0.990107	0.496421	0.471477	1.08809	-0.988436	0.552767	-1.54359	0.389912
	1282	-1.30417	0.476177	0.673129	1.09792	-0.871652	0.463421	-1.74582	0.346014
	1284	-1.03314	0.492384	0.835036	1.1134	-1.13376	0.543917	-1.57653	0.332721
	1286	-1.02379	0.46458	0.886934	1.1764	-1.73297	1.03106	-1.33703	0.424959
	1288	-1.14083	0.454385	1.08931	1.16835	-1.7746	1.06029	-1.43313	0.405683
	1290	-1.1743	0.405936	1.06482	1.19409	-1.75274	1.06429	-1.40036	0.414288
	1292	-1.27272	0.416122	1.24906	1.15513	-1.81459	1.21691	-1.41604	0.405297
	1294	-1.26379	0.368223	1.27863	1.17622	-1.70996	1.20451	-1.50737	0.442691
	1296	-1.20224	0.369597	1.21784	1.1295	-1.54448	1.21256	-1.70058	0.342945
	1298	-0.942665	0.407869	1.45842	1.15241	-1.14901	0.938682	-1.46754	0.40646
	1300	-1.35945	0.401744	1.26084	1.10235	-1.04582	0.928075	-1.55293	0.358136
	1302	-1.2835	0.422528	0.970157	1.15007	-0.533361	0.49367	-1.4758	0.332511
	1304	-1.1336	0.453801	0.632299	1.18023	-0.659613	0.596844	-1.26925	0.379134
	1306	-1.27847	0.467314	0.720123	1.23388	-0.83377	0.593653	-1.47309	0.366049
	1308	-1.40844	0.496022	0.727811	1.23737	-1.07358	0.636249	-1.43709	0.306366
	1310	-1.44061	0.459184	1.0083	1.26724	-1.10635	0.705832	-1.35282	0.382822
	1312	-1.33299	0.451681	0.882528	1.29526	-1.15467	0.822145	-1.25077	0.400581
	1314	-1.4157	0.409582	0.763211	1.20701	-1.46614	0.8745	-1.29708	0.375982
	1316	-1.82173	0.420297	0.200664	1.22114	-1.78445	0.941592	-1.63389	0.358617
	1318	-2.28152	0.372938	-0.513825	1.23113	-2.63288	1.17117	-2.40996	0.350441

## Sheet: Fig.4c
	Time traces										δCKAR response
		No RNAi				DAMB RNAi KK110947					No RNAi		DAMB RNAi KK110947
		Control		MP1 activation		Control		MP1 activation			Control	MP1 activation	Control	MP1 activation
	Time (s)	Mean	SEM	Mean	SEM	Mean	SEM	Mean	SEM		-1.43458	4.4087	0.21885	-2.0951
	0	-1.16273	0.528566	-2.45296	0.363228	-2.28887	0.402106	-1.9698	0.561102		-2.5469	1.1297	-1.6416	-3.0703
	2	-0.00566102	0.70431	-1.5299	0.344764	-1.24153	0.347012	-1.086	0.424634		-1.08135	0.831696	-2.3146	-1.39699
	4	0.603547	0.650923	-0.592111	0.483089	-0.427636	0.52221	-0.607516	0.315878		-1.7086	2.0256	-2.3471	0.28943
	6	0.258147	0.65197	-0.503721	0.455352	0.0681646	0.547068	-0.186032	0.318199		-1.5424	-2.2755	0.0828475	0.438435
	8	0.319935	0.774152	-0.750275	0.266348	0.24518	0.526054	-0.0628286	0.308934		-2.26795	0.59607	-1.22294	-0.24222
	10	0.728541	0.707096	-0.998261	0.32342	-0.0865083	0.455702	-0.117148	0.246305		1.0625	0.013329	-0.3768	-3.5991
	12	0.854932	0.70742	-0.407275	0.38258	0.100736	0.384731	-0.129535	0.266186		1.8012	-0.22211	-0.709105	-2.04685
	14	0.969809	0.778674	-0.426466	0.380395	-0.170389	0.368821	0.364994	0.345333		-0.72379	0.42505	1.31425	-1.7294
	16	1.13478	0.773028	-0.37234	0.37275	0.157653	0.384958	0.282867	0.329564			1.05899		0.713165
	18	1.12045	0.616619	-0.730359	0.374127	0.287401	0.364903	0.299476	0.319632					0.03155
	20	0.687491	0.496395	-0.427855	0.360065	-0.0811823	0.349533	0.211433	0.342541					-2.69453
	22	0.612816	0.483693	-0.334881	0.349994	-0.00407898	0.42282	0.229897	0.313141
	24	0.292951	0.549037	-0.165424	0.312102	0.0814633	0.38239	0.0332862	0.284047
	26	-0.244308	0.63202	0.0461839	0.250477	-0.112859	0.319779	0.0445344	0.257976
	28	-0.271374	0.47626	0.231053	0.21288	-0.0018286	0.290285	-0.0704587	0.239781
	30	-0.165119	0.207953	0.253378	0.20969	0.216877	0.225459	-0.194996	0.285197
	32	-0.112354	0.179775	0.416524	0.272377	0.479005	0.187772	-0.181137	0.334836
	34	0.00208737	0.178399	0.356178	0.289977	0.294996	0.239075	-0.0646487	0.353084
	36	0.0606481	0.290185	0.299514	0.28286	0.489256	0.231552	0.0915364	0.366716
	38	0.0930081	0.297689	0.417599	0.240836	0.262617	0.298372	0.083887	0.191684
	40	-0.166657	0.346578	0.300159	0.272261	0.22145	0.299312	0.0308195	0.235574
	42	-0.0675767	0.382969	0.274064	0.251086	-0.252043	0.408595	-0.0951301	0.203139
	44	-0.8453	0.642841	-0.214652	0.181011	-0.101171	0.265353	-0.122546	0.189402
	46	-0.43233	0.204529	-0.040669	0.210004	-0.0961817	0.405038	-0.0921794	0.195653
	48	-2.14496	1.68967	-0.077431	0.201604	-0.114877	0.176384	0.106399	0.253526
	50	-0.273983	0.285737	0.285167	0.113428	0.0464209	0.222268	0.0538083	0.196951
	52	-1.01105	0.846032	0.203246	0.169204	0.122517	0.20776	0.020872	0.185705
	54	-0.323695	0.164697	0.0572119	0.228319	-0.0997081	0.203128	-0.233572	0.223634
	56	-0.350725	0.176814	0.123432	0.210842	0.0674911	0.212907	-0.188198	0.241364
	58	0.15746	0.325463	0.0819092	0.206048	-0.24794	0.172457	-0.251969	0.207104
	60	0.15608	0.362445	0.137121	0.182543	-0.0827539	0.208633	0.00857753	0.290634
	62	-0.129413	0.18525	0.0240441	0.219744	-0.0179284	0.163192	0.177857	0.187521
	64	0.0404902	0.276037	0.0931887	0.129037	0.213838	0.419861	0.387271	0.184664
	66	0.0367469	0.217147	0.238827	0.199378	-0.0934912	0.375781	0.174732	0.255666
	68	0.0440388	0.299979	-0.0628081	0.259916	0.199415	0.364487	0.16936	0.206663
	70	0.139794	0.130792	0.273156	0.235205	-0.0814246	0.345371	0.2674	0.160278
	72	0.202015	0.1463	0.231432	0.227611	0.00451018	0.27912	0.00400393	0.182159
	74	0.172527	0.18297	0.288445	0.207188	-0.0674954	0.19274	0.088712	0.167669
	76	-0.0286627	0.153578	0.0791529	0.218693	0.32129	0.18829	0.0397171	0.154229
	78	-0.0595403	0.112612	0.314443	0.202436	0.259736	0.307903	-0.119435	0.17658
	80	-0.0187755	0.148095	0.30352	0.179427	0.0391758	0.392326	-0.255595	0.130036
	82	0.378123	0.329844	-0.315142	0.147945	0.111771	0.316964	-0.216989	0.141155
	84	0.391388	0.389712	0.0287866	0.17169	-0.160876	0.357879	-0.214685	0.107289
	86	-0.237145	0.470213	-0.244288	0.198545	-0.390143	0.422692	-0.145227	0.202179
	88	0.327295	0.229434	-0.0853018	0.250116	-0.401723	0.389709	-0.0232415	0.228527
	90	-0.0716882	0.260891	0.0668226	0.220084	-0.561677	0.330321	0.149267	0.285353
	92	-0.642046	0.299172	0.302345	0.192056	-0.254841	0.337476	0.153393	0.253267
	94	-0.29226	0.31509	0.217866	0.200996	-0.25499	0.369518	0.219852	0.225242
	96	-0.285406	0.301658	0.202886	0.173389	-0.287424	0.391105	0.159829	0.244602
	98	-0.368958	0.292546	0.0967514	0.148677	-0.120851	0.363196	0.382111	0.254742
	100	-0.451047	0.33942	0.0383731	0.157419	0.0977797	0.362374	0.454028	0.299856
	102	-0.306712	0.366589	0.0700432	0.108241	0.34007	0.281521	0.656545	0.341194
	104	-0.0457911	0.505998	0.0743332	0.136364	0.113424	0.195575	0.219093	0.369665
	106	-0.0892935	0.488866	-0.0345926	0.271277	0.134538	0.239676	-0.29088	0.292523
	108	-0.710775	0.738592	0.157613	0.233337	0.192113	0.264604	-0.117806	0.289831
	110	0.301979	0.394613	0.208874	0.246093	-0.146555	0.21398	-0.18211	0.291039
	112	0.209769	0.394772	0.230237	0.288343	-0.201643	0.237935	-0.352303	0.300244
	114	-0.318454	0.817349	-0.073772	0.317023	-0.196644	0.32492	0.048555	0.316864
	116	0.0413828	0.460921	-0.0794953	0.245682	-0.00555925	0.318061	-0.141076	0.338728
	118	0.318821	0.358027	0.0122436	0.214173	0.178574	0.279536	-0.300361	0.301835
	120	0.0298894	0.456123	0.271103	0.282694	0.704502	0.381384	-0.0335349	0.237247
	122	0.167651	0.544576	0.395577	0.31723	0.568342	0.426631	-0.218424	0.263935
	124	0.571028	0.60357	0.68252	0.362539	0.631633	0.406572	0.510416	0.692609
	126	0.936948	0.662831	0.644911	0.345809	0.348329	0.397624	0.548942	0.984621
	128	0.644847	0.731188	0.587303	0.339233	0.196757	0.316394	2.17488	2.27695
	130	0.948155	0.639882	0.349464	0.363205	0.0644052	0.325507	2.9822	3.26708
	132	0.527186	0.592342	-0.133602	0.398955	0.0748579	0.483063	2.82553	3.27241
	134	-0.549144	0.433195	0.116282	0.330866	0.00657985	0.388343	2.74575	3.27886
	136	-0.71851	0.38069	-0.0946411	0.465109	-0.581956	0.294204	-0.111775	0.266311
	138	-0.389599	0.529188	0.0400287	0.381095	-0.748621	0.37797	0.00876554	0.291665
	140	-0.357864	0.565057	-0.287778	0.487518	-0.471834	0.313502	0.644989	0.472834
	142	-1.7834	1.07997	-0.388557	0.519195	-0.567857	0.290698	0.6701	0.527705
	144	-1.02396	0.319154	-0.249242	0.562783	-0.418422	0.282286	1.05401	0.547462
	146	-0.573	0.567617	-0.124893	0.492495	-0.420647	0.256948	0.967787	0.588226
	148	-0.858712	0.246533	-0.52547	0.43959	-0.151907	0.236034	1.00448	0.767324
	150	-0.638126	0.338788	-0.662038	0.391321	-0.0733158	0.265697	0.855276	1.07164
	152	-0.409914	0.260306	-0.970251	0.348078	-0.186626	0.38	0.535833	1.12777
	154	-0.453407	0.350518	-1.16344	0.416437	-0.18636	0.448732	0.579907	1.1508
	156	-0.644901	0.48357	-1.20048	0.416661	-0.210698	0.306364	1.09196	1.55553
	158	-0.771472	0.418627	-1.33803	0.452498	-0.305938	0.299878	1.38475	1.6364
	160	-1.00618	0.449303	-1.28838	0.464487	-0.5202	0.293908	1.28171	1.64561
	162	-1.10663	0.329551	-1.22272	0.555025	-0.607454	0.295844	1.49732	1.62663
	164	-1.25339	0.331689	-1.51976	0.454608	-0.638684	0.382912	1.4415	1.61663
	166	-1.23165	0.280581	-1.98837	0.393322	-0.53801	0.328733	1.01012	1.3216
	168	-1.01158	0.380826	-1.74733	0.436694	-0.572762	0.310002	0.318331	0.858738
	170	-0.672227	0.452285	-1.57345	0.570722	-0.834145	0.385186	0.061809	0.747733
	172	-1.11451	0.590023	-1.59276	0.543327	-0.959228	0.522166	-0.0775199	0.575951
	174	-1.28048	0.499124	-1.68132	0.522573	-1.02762	0.469558	-0.371674	0.432975
	176	-1.33596	0.500738	-1.66191	0.505721	-1.13261	0.412691	-0.30399	0.639997
	178	-1.32157	0.460577	-1.74603	0.524305	-1.05631	0.302423	-0.497789	0.568754
	180	-1.19565	0.453513	-2.05869	0.558384	-1.03525	0.395682	-0.710639	0.609044
	182	-1.16655	0.483057	-1.77498	0.582099	-0.907675	0.494632	-0.667226	0.600733
	184	-0.596204	0.397107	-1.94746	0.559712	-0.907466	0.580278	-0.745217	0.746182
	186	-2.50272	1.36268	-2.10512	0.542939	-0.731699	0.542477	-0.613598	0.508628
	188	-0.748304	0.388738	-2.09891	0.596947	-0.683185	0.357573	-0.716978	0.470693
	190	-1.59161	0.458174	-2.31288	0.465115	-0.484596	0.357586	-0.413007	0.412178
	192	-0.97149	0.498552	-2.41397	0.546961	-0.65746	0.293056	-0.341176	0.640925
	194	-1.42597	0.406401	-2.1243	0.461548	-0.7563	0.266441	-0.56116	0.673506
	196	-0.672136	0.620929	-2.0408	0.489001	-0.820506	0.381769	-0.380257	0.711714
	198	-1.7532	0.511754	-2.16977	0.477095	-1.01718	0.474384	-0.339696	0.676111
	200	-0.99737	0.701256	-1.96246	0.495655	-0.998909	0.423594	-0.583008	0.721968
	202	-1.80574	0.637843	-1.939	0.453717	-0.789111	0.465139	-0.588209	0.67054
	204	-0.931317	0.685617	-2.21224	0.438957	-0.616717	0.387289	-0.732822	0.685269
	206	-2.11799	0.984795	-2.37399	0.43591	-0.51904	0.305958	-0.862438	0.72478
	208	-0.458033	0.584496	-2.38623	0.469276	-0.482537	0.276007	-1.02473	0.762681
	210	-1.97028	1.08967	-2.63246	0.628105	-0.706571	0.29602	-1.03879	0.741459
	212	-1.42235	0.614667	-2.66033	0.548826	-1.09362	0.322997	-0.757783	0.7526
	214	-1.46891	0.618373	-2.42395	0.381239	-1.23291	0.478758	-0.658992	0.673247
	216	-1.64609	0.579346	-2.44293	0.378431	-1.10265	0.527516	-0.970111	0.675523
	218	-1.75919	0.569392	-2.3387	0.342781	-0.998534	0.533187	-1.04656	0.655027
	220	-1.8097	0.574062	-2.68994	0.380687	-0.655269	0.467831	-1.00542	0.657464
	222	-1.17019	0.604614	-2.56854	0.441162	-0.389251	0.458952	-1.14512	0.645608
	224	-2.57349	0.931034	-2.60006	0.488013	-0.413704	0.468361	-1.18509	0.543499
	226	-1.46291	0.406406	-2.93511	0.532711	-0.69355	0.35766	-0.972517	0.544755
	228	-1.38852	0.324203	-3.14583	0.525704	-0.804944	0.504692	-0.999032	0.542941
	230	-1.46216	0.430291	-3.04015	0.554992	-0.860563	0.402562	-0.919806	0.543134
	232	-1.34477	0.414102	-3.18702	0.517693	-1.07043	0.444108	-0.632215	0.546413
	234	-1.23233	0.356747	-3.11744	0.498233	-1.05955	0.437934	-0.611034	0.638724
	236	-1.12278	0.490943	-3.10465	0.502827	-0.97431	0.474833	-0.616388	0.698481
	238	-2.81652	1.04958	-3.04049	0.524484	-1.09226	0.510773	-0.799703	0.746739
	240	-1.1655	0.628958	-3.01959	0.504296	-0.93228	0.498587	-1.63644	0.565849
	242	-1.26969	0.763619	-3.29015	0.504141	-1.04479	0.486358	-1.6497	0.797309
	244	-1.38236	0.739647	-3.64349	0.554474	-1.47258	0.650879	-2.58476	0.910326
	246	-1.74446	0.731952	-4.06391	0.840967	-1.7842	0.650877	-3.25556	0.776541
	248	-1.92512	0.724494	-4.41733	0.804921	-1.76381	0.69093	-2.86361	0.859028
	250	-1.98728	0.883367	-4.8515	1.10824	-2.09223	0.842721	-2.75527	0.867323
	252	-3.43006	0.77252	-5.69796	1.34767	-1.60158	0.789967	-2.84732	0.933635
	254	-2.02852	0.765819	-5.81133	1.36224	-1.79295	0.889717	-2.97498	0.973586
	256	-1.8683	0.755395	-5.30812	1.29612	-1.43803	0.923749	-2.83033	1.04894
	258	-1.36055	0.644381	-4.67663	0.950479	-1.00539	0.65745	-2.67855	1.0395
	260	-1.23957	0.587185	-4.49755	0.785312	-0.598686	0.628651	-2.62793	1.0807
	262	-1.19593	0.63201	-4.47099	0.75505	-0.670526	0.607786	-2.49916	1.05019
	264	-0.981472	0.714653	-4.33175	0.829302	-0.550029	0.643492	-2.47454	1.01053
	266	-1.2809	0.60532	-3.79478	0.737792	-0.419408	0.670056	-2.50374	1.02441
	268	-0.99457	0.709089	-3.45501	0.727829	-0.309569	0.696481	-1.83563	0.774839
	270	-0.650167	0.530161	-3.30049	0.748426	-0.517044	0.653063	-1.9826	0.751054
	272	-0.562802	0.711447	-2.89901	0.763142	-0.342456	0.57205	-1.60647	0.707574
	274	-0.447118	0.716049	-2.67962	0.819904	-0.288656	0.570847	-1.44712	0.667081
	276	-0.634652	0.609756	-2.48375	0.857023	-0.427338	0.514141	-1.30274	0.547801
	278	-0.283509	0.681778	-2.59508	0.796399	-0.265746	0.536342	-1.07922	0.549263
	280	-0.658495	0.585397	-2.30466	0.840234	-0.35607	0.508633	-0.770747	0.547155
	282	-0.474327	0.689388	-1.53037	0.773527	-0.421905	0.440511	-0.566985	0.556057
	284	-0.429647	0.701505	-1.34492	0.784175	-0.506942	0.51033	-0.32991	0.758824
	286	-0.277775	0.658433	-1.26318	0.875912	-0.453525	0.537322	0.100944	0.841669
	288	-0.448636	0.72559	-1.1497	0.841465	-0.619199	0.562168	0.253753	0.856201
	290	-0.386887	0.65717	-1.06592	0.718947	-0.67289	0.444743	0.410193	0.81523
	292	-0.327588	0.725643	-0.979831	0.734322	-0.603136	0.555231	0.293789	0.827786
	294	0.187648	0.676635	-0.885651	0.794977	-0.338821	0.565125	0.351501	0.650905
	296	0.175783	0.728006	-0.902857	0.699683	-0.173832	0.63735	0.503603	0.605432
	298	0.140385	0.646893	-0.720732	0.72647	-0.447979	0.699563	0.50899	0.487242
	300	-0.454504	0.719207	-0.638239	0.747334	0.0605478	0.667529	0.652572	0.496364
	302	-0.533735	0.764617	-0.645818	0.635658	-0.0953193	0.743929	0.705638	0.488836
	304	-0.694437	0.782025	-0.281511	0.579495	-0.146065	0.729718	0.464173	0.486809
	306	-0.80334	0.690352	-0.250849	0.545133	-0.325306	0.566103	0.639209	0.481771
	308	-0.588223	0.760965	-0.797589	0.5602	-0.233068	0.549382	0.508439	0.499421
	310	-0.745519	0.865823	-0.851356	0.702578	-0.387919	0.575242	0.522394	0.480052
	312	-1.00759	0.73238	-0.627501	0.668794	-0.145275	0.512497	0.145546	0.493213
	314	-0.904225	0.624331	-0.547679	0.696109	-0.635206	0.579063	0.427114	0.512399
	316	-0.929155	0.582749	-0.572818	0.642934	-0.859319	0.674924	0.367644	0.526634
	318	-1.46763	0.651062	-0.275223	0.721938	-1.12961	0.579755	0.734359	0.45351
	320	-1.34941	0.62635	-0.207111	0.684778	-0.925499	0.427062	0.637193	0.575372
	322	-1.8886	0.369802	-0.458457	0.614122	-0.901681	0.266899	0.779839	0.514426
	324	-1.5574	0.410267	-0.305662	0.506506	-0.160471	0.330423	0.59724	0.649694
	326	-0.775831	0.757612	-0.219347	0.541937	-0.297792	0.379464	0.397681	0.649295
	328	-0.587209	0.725667	-0.354629	0.457679	-0.3102	0.352978	0.525194	0.639743
	330	-1.26503	0.380038	-0.447527	0.474026	-0.714458	0.329161	0.579695	0.622773
	332	-1.77945	0.509362	-0.0638279	0.539841	-0.592782	0.371785	0.560243	0.730088
	334	-1.0444	0.826205	-0.0742965	0.439839	-0.814001	0.349113	0.70644	0.690283
	336	-0.689369	0.692087	-0.0615339	0.41819	-0.916805	0.318873	0.565457	0.765218
	338	-0.794275	0.790174	-0.0273015	0.458893	-0.79414	0.432176	0.321309	0.699566
	340	-0.611175	0.784809	0.472066	0.694085	-0.827908	0.457194	0.417377	0.558305
	342	-0.152513	0.701527	0.150836	0.517368	-0.705771	0.500281	0.251079	0.582726
	344	-0.0448235	0.709948	0.28266	0.786252	-0.430164	0.436141	0.284864	0.597394
	346	-0.417785	0.808039	0.117555	0.679577	-0.243968	0.334576	0.23865	0.61912
	348	-0.351989	0.675919	0.534024	0.82589	-0.293539	0.300278	0.994472	0.859491
	350	-0.305509	0.598204	0.437094	0.57557	-0.13308	0.393625	0.913727	0.845733
	352	-0.167575	0.801526	0.870042	0.755796	-0.169034	0.379229	0.781303	0.586627
	354	-0.108124	0.667521	0.378951	0.495275	-0.427123	0.377743	0.777001	0.597025
	356	-0.0589611	0.670315	0.783702	0.791209	-0.488739	0.348404	0.485943	0.41967
	358	-0.295636	0.763271	0.218006	0.623916	-0.52529	0.303748	-0.0635716	0.398115
	360	-0.330975	0.79193	0.347182	0.625245	-0.36506	0.291302	-0.621408	0.839891
	362	-0.0152958	0.892378	0.130576	0.583785	-0.0858506	0.435119	-0.916022	1.03576
	364	0.178775	1.01491	0.931816	0.604586	0.0606092	0.503554	-0.485638	1.09841
	366	-0.0163826	0.863838	1.27993	0.747173	-0.0156476	0.525935	-0.503554	1.08947
	368	-0.157192	0.824836	1.18163	0.722953	-0.117204	0.634114	-0.374	0.956834
	370	-0.171712	0.795275	1.17324	0.814534	-0.267944	0.569264	0.994675	0.979438
	372	-0.536038	0.799663	0.839922	0.671383	-0.199476	0.432775	1.84347	1.45891
	374	-1.15137	0.195152	0.078132	0.73927	-0.0664315	0.391247	1.8941	1.71414
	376	-1.40733	0.369995	-0.520607	1.10864	-0.0154498	0.383048	1.65174	1.73156
	378	-0.0886828	1.12088	-0.618852	1.14993	-0.0817577	0.405443	1.28148	1.75133
	380	-0.392296	1.2215	-0.650438	1.10819	0.140888	0.411077	0.263312	0.692997
	382	-1.36478	0.491193	-0.821102	0.967473	0.076254	0.423257	-0.161617	0.727252
	384	-1.3198	0.271847	-0.861565	1.02079	-0.283664	0.314882	-0.350496	0.704469
	386	-0.703101	0.684299	-0.728149	0.946526	-0.398595	0.470088	-0.210591	0.87354
	388	-0.637999	0.676009	-0.853751	0.841176	-0.811703	0.515871	-0.222078	0.922607
	390	-1.35144	0.271426	-0.66153	1.04549	-0.867812	0.512056	-0.436445	1.27775
	392	-0.943549	0.672135	-0.482806	1.05772	-0.942931	0.556793	0.201722	1.48735
	394	-0.790154	0.69906	-1.73321	0.808003	-0.565889	0.505537	0.563986	1.68176
	396	-0.954307	0.594917	-1.08949	1.07814	-0.473743	0.50655	0.950123	2.24397
	398	-0.844268	0.598557	-1.06475	1.05148	-0.194371	0.59619	0.766797	2.24179
	400	-1.03149	0.716132	-1.50137	0.70176	-0.443351	0.627802	1.08678	2.21027
	402	-1.0341	0.696221	-1.95882	0.592116	-0.434858	0.550487	0.749958	2.14048
	404	-0.943566	0.681066	-1.83458	0.629701	-0.706711	0.659266	-0.0761499	1.46663
	406	-1.08734	0.713668	-1.94424	0.533607	-0.954421	0.518491	-0.0387271	1.46317
	408	-1.38229	0.801869	-1.69831	0.613599	-1.06437	0.507317	0.183853	1.43185
	410	-1.21515	0.774489	-1.92307	0.545287	-0.920061	0.526989	0.57598	1.84093
	412	-1.76773	0.597815	-1.59159	0.406372	-1.01542	0.609307	0.938701	1.84618
	414	-1.89247	0.63857	-1.60892	0.5957	-1.16336	0.513786	1.43993	2.13184
	416	-1.84241	0.66007	-1.83489	0.575876	-1.1972	0.461508	1.45559	2.14976
	418	-1.6992	0.596166	-1.64474	0.52558	-0.906232	0.619029	1.56135	2.3566
	420	-2.02963	0.693733	-1.58635	0.757485	-1.23449	0.513504	1.77646	2.56659
	422	-2.16228	0.610054	-1.70677	0.792505	-1.219	0.491736	1.58654	2.59063
	424	-2.1248	0.601466	-2.16471	0.560032	-1.22166	0.512644	1.44303	2.81117
	426	-2.19434	0.617636	-1.72078	0.802924	-1.21907	0.5665	1.57073	2.80693
	428	-2.08403	0.596305	-1.8057	0.69619	-1.28266	0.587738	1.23266	2.65702
	430	-2.60892	0.438676	-1.92096	0.68678	-1.25446	0.53424	1.30115	2.41948
	432	-1.70304	0.746699	-1.99368	0.630138	-1.19155	0.621757	0.873645	2.03739
	434	-2.91244	0.779213	-1.8912	0.567246	-1.15248	0.530922	0.768086	1.90762
	436	-1.68595	0.739561	-2.00062	0.490796	-1.12801	0.545706	0.787471	1.89404
	438	-1.55459	0.704064	-2.18983	0.493135	-1.2612	0.504911	0.608593	1.89793
	440	-0.947758	0.594875	-2.07849	0.340681	-1.10905	0.512533	0.224764	1.7004
	442	-0.859894	0.608767	-2.2144	0.390383	-1.25331	0.514199	-1.14534	0.618325
	444	-0.814949	0.62542	-2.265	0.365244	-1.24088	0.53065	-1.66209	0.559547
	446	-1.08423	0.478229	-2.31729	0.410402	-1.36448	0.527666	-1.5497	0.587122
	448	-1.43465	0.531879	-2.49483	0.50065	-1.31862	0.594765	-1.73412	0.511842
	450	-1.52945	0.540774	-2.36815	0.413656	-1.63017	0.563785	-1.51212	0.581689
	452	-1.26238	0.55758	-2.45459	0.354314	-1.17457	0.5521	-1.42616	0.455593
	454	-1.51752	0.5578	-2.68146	0.74607	-1.31877	0.640621	-1.28251	0.479876
	456	-1.28202	0.844341	-2.20871	0.864959	-1.27738	0.512144	-1.39473	0.510544
	458	-2.95467	0.850838	-2.24335	0.880808	-1.18977	0.521083	-1.52357	0.564257
	460	-1.70494	0.783026	-2.07345	0.876725	-1.14165	0.550771	-1.65682	0.485375
	462	-1.87354	0.749688	-2.00902	0.777394	-1.60982	0.63044	-1.58478	0.509532
	464	-2.06529	0.838558	-2.04444	0.705812	-1.13858	0.538767	-1.34464	0.569223
	466	-1.92217	0.753794	-2.2282	0.701406	-1.1103	0.571539	-1.57241	0.549758
	468	-1.99831	0.751991	-2.71331	0.504789	-1.05782	0.643317	-1.41549	0.618455
	470	-1.77308	0.810025	-3.03781	0.511525	-0.964852	0.601791	-1.60918	0.612328
	472	-1.48773	0.952336	-3.33881	0.583257	-1.04289	0.507755	-1.74014	0.664836
	474	-0.624082	0.969781	-3.49943	0.580852	-1.53177	0.521455	-1.7725	0.665659
	476	-1.24428	1.15924	-3.512	0.531467	-1.28767	0.547536	-1.94505	0.785721
	478	-1.05409	1.13868	-3.32398	0.548422	-1.50829	0.560187	-1.83128	0.642061
	480	-1.13588	0.768874	-3.29583	0.627908	-1.64375	0.640242	-2.09713	0.646032
	482	-1.64205	0.736899	-3.51929	0.579137	-1.66798	0.665007	-2.45579	0.583191
	484	-1.82879	0.740269	-3.72631	0.692876	-1.71135	0.644881	-2.83633	0.68325
	486	-2.2861	0.719302	-3.93927	0.820794	-2.21807	0.551746	-2.84639	0.8609
	488	-2.15333	0.727422	-4.35163	0.958651	-2.11344	0.519039	-2.85414	0.950296
	490	-2.31891	0.725666	-4.34869	0.949519	-1.88105	0.564758	-2.59621	1.01609
	492	-2.04439	0.73013	-4.05463	0.901677	-1.85036	0.460139	-2.75542	1.0444
	494	-1.95703	0.722669	-3.72509	0.85938	-1.41289	0.583854	-2.46444	1.02082
	496	-1.58111	0.561264	-3.64733	0.847201	-1.56513	0.55256	-2.38912	0.969201
	498	-1.52632	0.6089	-3.29572	0.899118	-1.54809	0.653146	-2.35668	0.871874
	500	-1.6567	0.507104	-3.06505	0.830168	-1.85386	0.581408	-2.25681	0.877092
	502	-2.01485	0.603466	-2.50588	0.686919	-1.88016	0.649228	-2.11934	0.860827
	504	-1.76195	0.73069	-2.36039	0.79148	-2.1006	0.644236	-2.21939	0.950569
	506	-2.05407	0.630138	-2.47695	0.634535	-1.68926	0.656898	-2.23467	0.949993
	508	-1.57225	0.910035	-2.36098	0.615172	-1.66452	0.69133	-2.1494	0.876755
	510	-1.32114	0.867934	-2.49387	0.565517	-1.69718	0.755606	-2.05616	0.883664
	512	-1.31363	0.696713	-2.0111	0.571744	-1.2534	0.803973	-2.12059	0.906975
	514	-1.26451	0.813125	-1.95439	0.660696	-0.989714	0.834892	-2.04227	0.898996
	516	-0.99121	0.859155	-1.60844	0.61929	-0.999916	0.70854	-2.04504	0.979001
	518	-0.698931	0.793166	-1.36028	0.66309	-0.942082	0.593016	-1.92766	1.03413
	520	-0.824587	0.78971	-1.22534	0.520888	-0.463157	0.47144	-1.5996	0.997432
	522	-0.934954	0.950902	-1.29028	0.614219	-1.0298	0.435876	-1.58218	0.913852
	524	-1.00059	0.590376	-1.12872	0.643599	-0.747082	0.542105	-1.56637	0.977926
	526	-1.84692	0.538751	-1.2436	0.674513	-0.891024	0.64484	-1.42541	0.831776
	528	-1.3141	0.677519	-0.64339	0.628124	-0.403537	0.637222	-0.902131	0.6824
	530	-0.85592	0.814392	-1.32035	0.89557	-0.522423	0.880676	-0.737628	0.588957
	532	-0.691853	0.77354	-1.33636	0.955145	-0.33917	0.879314	-0.763578	0.558287
	534	-0.678226	0.773762	-1.15158	0.890648	-0.611497	0.850861	-0.846376	0.550637
	536	-0.810952	0.774829	-0.499257	0.689307	-0.604385	0.871401	-0.941462	0.570101
	538	-0.440953	0.802368	-1.02275	0.788136	-0.463905	0.94742	-0.422386	0.855789
	540	-0.377847	0.81567	-0.909916	0.863981	-0.551754	0.926956	-0.299361	0.852016
	542	-0.745558	0.697819	-1.41285	0.77397	0.281529	1.46812	0.114757	1.06074
	544	-0.327944	0.630216	-1.50926	0.810392	0.0968582	1.51557	0.152476	0.951445
	546	-0.184194	0.581552	-1.27814	0.923732	0.165116	1.49966	-0.040457	0.91832
	548	-0.0140833	0.573515	-1.35628	0.89651	0.137635	1.45968	0.131816	0.902761
	550	-0.0855438	0.568128	-1.18814	0.859017	0.086596	1.46927	-0.0396896	0.959463
	552	-0.0680148	0.632063	-1.0576	0.832319	0.196128	1.14062	-0.311014	0.95184
	554	0.126798	0.662307	-0.890126	0.846852	-0.713295	0.715768	-0.29099	0.97231
	556	0.033666	0.739229	-0.544093	0.764512	-0.959877	0.735621	0.139073	0.888698
	558	0.197596	0.724664	-0.714587	0.712002	-1.12723	0.745234	-0.336586	0.719726
	560	0.426421	0.821086	-1.05658	0.738927	-1.14255	0.679827	-0.59029	0.545271
	562	0.217068	0.964486	-0.87645	0.699912	-1.42538	0.835447	-0.77142	0.533368
	564	0.15028	1.02054	-0.414815	0.608999	-1.63762	0.939541	-0.822834	0.480395
	566	0.210966	1.0048	-0.729117	0.7037	-1.69147	0.811322	-0.662727	0.479874
	568	-0.712916	0.534444	-0.433723	0.70692	-1.72544	0.784422	-0.622356	0.47047
	570	-1.25737	0.316423	-0.583182	0.845658	-1.76295	0.728687	-0.753269	0.410489
	572	-0.914666	0.297421	-0.921818	0.919018	-1.70826	0.622867	-0.745829	0.473752
	574	-0.502799	0.896254	-1.07046	0.989073	-1.46055	0.648672	-0.65216	0.550367
	576	-0.249849	0.898483	-0.843802	0.991837	-1.07265	0.524953	-0.701746	0.562802
	578	-0.215067	0.945238	-0.851442	1.10179	-1.0369	0.502175	-0.812398	0.549217
	580	-0.0576767	0.918742	-0.878031	1.11176	-1.06521	0.43664	-0.552969	0.545668
	582	0.046079	0.829336	-1.00244	0.985105	-1.15776	0.390976	-0.505805	0.558275
	584	-1.00377	0.330706	-1.00868	0.803173	-1.20278	0.393873	-0.250951	0.633611
	586	-1.07236	0.327068	-1.15509	0.834494	-0.962752	0.375544	-0.292893	0.62051
	588	-1.01127	0.326217	-0.967584	0.837018	-0.799369	0.337305	-0.312984	0.651319
	590	-0.305077	0.73892	-0.604177	1.01243	-0.908609	0.449927	-0.370679	0.659483
	592	-0.209273	0.72675	-0.387981	1.10338	-0.695399	0.436553	-0.542393	0.685364
	594	-0.133845	0.721767	-0.207542	1.19364	-0.526213	0.414769	-0.232153	0.532593
	596	-1.36118	0.634289	-0.257326	1.15465	-1.16571	0.395787	-0.521258	0.671741
	598	-1.27743	0.684929	-0.0633661	1.06492	-0.928822	0.309126	-0.23225	0.587544
	600	-1.3714	0.685108	-0.105709	1.15546	-1.25956	0.359314	-0.171793	0.626512
	602	0.225071	1.03126	0.171476	1.00677	-1.0814	0.312777	0.214331	0.525818
	604	0.0460885	1.06503	0.244339	0.998414	-1.13993	0.310693	0.424701	0.65638
	606	0.293103	0.991415	-0.0877476	0.98706	-0.84073	0.361016	1.27092	1.71857
	608	-0.0141415	0.839767	-0.104683	1.06509	-0.487981	0.550632	1.68728	1.73453
	610	-0.272407	0.83042	-0.507071	0.953034	-0.25572	0.501665	1.38984	1.77668
	612	-0.408902	0.859694	-1.42484	1.02746	-0.566855	0.594482	0.915608	1.84432
	614	-0.284506	0.820021	-1.46363	0.940182	-0.801291	0.521674	-0.0528137	1.12986
	616	-0.608134	1.03596	-1.56332	0.914265	-1.08011	0.570472	0.358902	1.15461
	618	-0.78045	1.01144	-1.28877	0.837545	-1.24946	0.563971	-0.00561607	1.07159
	620	-1.46159	0.831941	-1.38899	0.756575	-1.1701	0.613589	-0.542512	0.937518
	622	-2.26674	0.5595	-1.44787	0.729952	-0.982731	0.592705	-0.668717	0.870113
	624	-1.46068	0.799504	-1.59388	0.874376	-1.23936	0.511156	-1.40418	0.606279
	626	-0.931916	0.666136	-1.60606	1.05297	-1.21308	0.501902	-1.42766	0.664371
	628	-1.60855	0.397306	-1.98959	0.982056	-1.33856	0.473673	-1.55543	0.627681
	630	-1.60769	0.448472	-1.63193	0.864968	-1.64664	0.544127	-1.06971	0.865351
	632	-1.05943	0.648626	-1.7621	0.718542	-1.68735	0.54868	-0.41355	1.16699
	634	-1.17335	0.693475	-1.76975	0.720546	-1.4767	0.56317	-0.396279	1.20016
	636	-2.13769	0.487831	-1.94548	0.69785	-1.50323	0.530988	-0.673187	0.921586
	638	-1.86277	0.538016	-1.99302	0.780785	-1.16834	0.575597	-0.909337	0.889252
	640	-1.66775	0.73254	-1.94122	0.760461	-1.58827	0.534095	-0.791881	0.887903
	642	-1.88367	0.52924	-2.02041	0.773247	-1.34909	0.547875	-0.977011	0.92468
	644	-2.18276	0.581125	-2.4609	0.725413	-1.64251	0.50092	-0.678182	1.0803
	646	-1.90598	0.667578	-2.48528	0.713672	-1.4852	0.430835	-0.425502	1.18279
	648	-1.94154	0.65642	-2.74654	0.723177	-2.12468	0.511054	0.0244555	1.27131
	650	-2.13479	0.720139	-2.52445	0.609561	-1.82591	0.407963	-0.0016299	1.34911
	652	-1.98139	0.873644	-2.18497	0.691024	-1.7388	0.401517	0.0542427	1.45001
	654	-1.7776	0.85294	-1.97022	0.914436	-1.56603	0.49419	0.0941056	1.58946
	656	-1.65322	0.846805	-2.05762	0.978103	-1.74499	0.614122	0.000625684	1.77306
	658	-1.64087	0.881524	-1.70623	1.14997	-1.26838	0.763611	-0.462778	1.6786
	660	-1.58811	0.85193	-2.43548	0.936268	-1.49563	0.780969	-0.33518	1.80622
	662	-1.88626	0.586984	-2.38853	0.795317	-1.29184	0.925274	-0.0358145	1.79957
	664	-1.72455	0.692418	-2.06093	0.931815	-1.73622	0.825746	0.0168799	1.78297
	666	-1.79885	0.669034	-2.41458	0.933763	-1.66924	0.707912	-0.283749	1.7956
	668	-1.77806	0.662251	-2.24005	0.880527	-1.60307	0.773586	0.18791	1.91984
	670	-1.97397	0.655252	-2.18536	0.848714	-1.85808	0.833134	0.363459	1.92247
	672	-2.18652	0.620139	-2.36996	0.860124	-1.86592	0.585816	0.288754	1.92488
	674	-1.86442	0.779535	-2.27376	0.810475	-1.46875	0.646305	-0.124717	1.56011
	676	-2.47273	0.508875	-2.24197	0.763811	-1.50702	0.640595	-0.120888	1.61621
	678	-1.95885	0.615232	-2.50365	0.852431	-1.93478	0.60365	-0.158502	1.58036
	680	-2.18092	0.538488	-2.34217	0.865638	-1.66294	0.620129	-0.323073	1.59276
	682	-1.93507	0.673879	-2.42075	0.906609	-1.60575	0.553819	-0.478345	1.57821
	684	-2.30128	0.489824	-3.35001	0.957233	-2.2197	0.500316	-0.399843	1.58214
	686	-2.10285	0.536719	-3.41524	0.884934	-2.45161	0.485216	-0.249871	1.53029
	688	-2.32943	0.392967	-3.12164	0.804346	-1.988	0.600862	-0.524793	1.56622
	690	-2.30813	0.387773	-3.20046	0.876337	-1.73004	0.70409	-0.693601	1.37462
	692	-2.24143	0.422256	-3.18272	0.745685	-1.66323	0.789728	-0.668501	1.35422
	694	-2.22845	0.488252	-2.87928	0.808063	-1.62663	0.740167	-0.803272	1.39429
	696	-1.99037	0.515819	-2.83664	0.755287	-1.5369	0.770698	-0.686477	1.75006
	698	-2.71223	0.640007	-2.8426	0.860146	-1.51711	0.689698	-0.429253	1.69304
	700	-1.77636	0.505837	-2.87239	0.777267	-1.96722	0.662067	-0.237248	1.67258
	702	-2.89075	0.806606	-2.70827	0.839347	-2.15343	0.710217	-0.282497	1.67879
	704	-1.83187	0.578591	-2.79593	0.870238	-2.22975	0.645379	0.113061	1.65498
	706	-3.27914	1.15874	-2.71239	0.909077	-2.20621	0.606344	0.06848	1.59953
	708	-2.25277	0.538935	-2.59539	0.854936	-2.156	0.568653	0.400322	2.01236
	710	-3.23394	1.01944	-2.50764	0.907828	-1.90086	0.550121	0.259922	2.03575
	712	-2.07456	0.366096	-2.52838	0.77295	-2.16245	0.582628	0.0445	2.09513
	714	-3.2681	0.972862	-2.74071	0.60709	-2.06278	0.627811	-0.0340891	2.00549
	716	-2.21718	0.356775	-3.08315	0.601137	-2.38477	0.67388	-0.119592	2.01136
	718	-3.16679	0.991895	-3.41245	0.769537	-2.99313	0.584658	-0.192533	1.96594
	720	-2.11654	0.56548	-3.54956	0.779664	-2.98381	0.640644	-0.373051	1.92768
	722	-1.9106	0.940064	-3.89387	0.858016	-3.10826	0.606827	-0.75366	1.47649
	724	-2.39278	1.09879	-4.40074	1.05289	-3.11455	0.648686	-1.21266	1.56235
	726	-2.28877	1.01548	-4.84699	1.09426	-3.01438	0.720114	-1.27837	1.64012
	728	-2.78293	1.04678	-5.01447	1.07069	-3.05817	0.924921	-1.40341	1.64137
	730	-2.87324	0.804092	-5.23043	1.28824	-2.96328	1.14784	-1.80853	1.36562
	732	-2.91828	0.852706	-5.72036	1.51902	-3.31993	1.50248	-2.13749	1.42738
	734	-2.66138	0.816063	-5.45654	1.56534	-3.06405	1.51005	-2.29917	1.37293
	736	-2.45295	0.87302	-4.3477	1.36107	-2.73543	1.29928	-2.49923	1.3932
	738	-2.29517	0.634387	-4.08936	1.41784	-2.27655	1.0356	-2.37674	1.36132
	740	-1.7667	0.860814	-3.4276	1.23754	-1.4664	0.675256	-2.15835	1.19774
	742	-2.63163	0.587801	-3.11312	0.999509	-1.22665	0.62916	-2.73145	0.77079
	744	-1.45698	0.885864	-3.05198	0.941652	-0.875167	0.613485	-2.81155	0.833103
	746	-1.76558	0.961824	-3.43543	0.873557	-1.07609	0.595885	-2.66506	0.805502
	748	-1.73919	0.955949	-3.33114	0.850424	-1.23887	0.499038	-2.44471	0.80867
	750	-1.84227	0.942599	-3.43508	0.802306	-0.960195	0.421684	-2.21433	0.759799
	752	-1.82362	0.984481	-2.88824	0.815544	-1.32911	0.362496	-2.57226	0.83235
	754	-1.85979	1.04314	-2.74125	0.844873	-1.08253	0.334524	-2.3698	0.854036
	756	-1.56516	1.07366	-2.24152	0.830108	-1.04996	0.324372	-2.37614	0.807104
	758	-1.33698	1.06232	-1.94853	0.895297	-0.841016	0.303192	-2.4393	0.793077
	760	-1.14847	1.23903	-1.78475	1.00872	-0.89444	0.374316	-2.53883	0.797481
	762	-0.994119	1.17312	-1.3547	1.06956	-0.626048	0.273933	-2.37354	0.812544
	764	-0.865912	0.988515	-1.69918	0.941284	-0.496537	0.305822	-2.11929	0.822545
	766	-0.916661	0.967138	-1.17495	1.06217	-0.333628	0.423846	-2.04686	0.777211
	768	-0.993345	1.14957	-0.827773	0.822903	-0.554425	0.505743	-1.84699	0.690011
	770	-1.24392	0.969063	-0.715632	0.726823	-0.883618	0.547551	-1.46358	0.592892
	772	-1.70042	0.6158	-0.719879	0.786061	-0.963132	0.525906	-1.45806	0.576609
	774	-1.61924	0.586409	-0.72214	0.742115	-1.3605	0.674295	-1.07909	0.617079
	776	-1.63593	0.541754	-1.00832	0.62846	-1.36103	0.527292	-0.722144	0.676277
	778	-1.18389	0.491543	-1.12984	0.612931	-1.45797	0.513437	-0.324417	0.706074
	780	-1.49507	0.469334	-1.31584	0.639994	-1.25168	0.453507	-0.422969	0.73941
	782	-1.11729	0.516192	-1.3576	0.60938	-1.13389	0.524561	-0.489113	0.796894
	784	-0.926762	0.526014	-1.30001	0.613076	-1.2143	0.378423	-0.431111	0.657333
	786	-0.865059	0.481146	-1.21624	0.635152	-0.91847	0.530786	-0.303892	0.704533
	788	-0.93828	0.54115	-1.0133	0.701017	-1.09238	0.447588	-0.507676	0.667886
	790	-0.908095	0.521822	-0.61316	0.752182	-0.95636	0.505938	-0.243853	0.679201
	792	-1.01878	0.547013	-0.201051	0.67534	-1.02747	0.44501	-0.213728	0.64386
	794	-1.11474	0.488151	-0.152048	0.629157	-0.740811	0.400848	-0.610286	0.71019
	796	-0.991186	0.465028	-0.30467	0.649585	-0.385036	0.368079	-0.64252	0.764423
	798	-0.722099	0.449539	-0.239498	0.613364	-0.361184	0.430239	-0.399042	0.777863
	800	-0.673443	0.452442	-0.0161503	0.643827	-0.478453	0.421598	-0.655235	0.820062
	802	-0.786044	0.381345	-0.0307506	0.653718	-0.317971	0.445283	-0.695167	0.767699
	804	-1.01057	0.432123	-0.200991	0.684003	-0.454155	0.537978	-0.591068	0.702623
	806	-1.15863	0.548624	0.0883259	0.757671	-0.801688	0.576468	-0.380731	0.735717
	808	-0.892308	0.548603	-0.0489708	0.771888	-0.881574	0.567748	-0.227429	0.813421
	810	-0.921727	0.434798	-0.0833487	0.717082	-0.903431	0.641728	0.0428555	0.85344
	812	-0.933076	0.491354	-0.199298	0.605208	-0.991631	0.604723	-0.0256443	0.863355
	814	-0.903278	0.461176	-0.0681842	0.598442	-0.738378	0.601953	-0.104224	0.755361
	816	-0.721991	0.410903	-0.159384	0.511862	-0.909183	0.520943	-0.360213	0.679842
	818	-0.750691	0.427034	-0.0804684	0.528758	-0.996871	0.499242	-0.646546	0.462739
	820	-0.670084	0.472202	-0.162603	0.518627	-1.14315	0.444325	-0.518878	0.452615
	822	-0.366897	0.430664	-0.120582	0.484848	-1.1101	0.472197	-0.508342	0.521016
	824	-0.369836	0.444581	0.00571546	0.451502	-1.20302	0.414841	-0.791835	0.62121
	826	-0.46305	0.407688	0.0175872	0.567053	-0.78959	0.506749	-0.598021	0.657676
	828	-0.604715	0.362938	0.0870358	0.57333	-0.999919	0.546911	-0.781243	0.753123
	830	-0.659908	0.41237	0.0072808	0.621526	-1.08561	0.535876	-0.886324	0.800356
	832	-0.40512	0.324583	0.547416	0.507464	-1.1029	0.475528	-0.946484	0.778028
	834	-0.419364	0.428298	-0.108256	0.648779	-0.847889	0.583038	-0.8857	0.654955
	836	-0.773962	0.378957	-0.00438091	0.637395	-0.827828	0.534316	-1.16376	0.48067
	838	-1.32221	1.08109	0.160203	0.52628	-0.841688	0.546825	-1.05964	0.472689
	840	-1.35124	1.09906	0.0809301	0.532256	-0.837614	0.549662	-1.06801	0.484797
	842	-1.24889	1.11162	-0.0598668	0.536485	-0.543558	0.605539	-0.951855	0.428497
	844	-0.259142	0.546599	0.152099	0.503093	-0.612851	0.538957	-0.909348	0.412939
	846	-0.513746	0.628155	0.171636	0.577978	-0.645692	0.524633	-0.630723	0.449346
	848	-0.632205	0.613737	0.356367	0.497623	-0.850451	0.530191	-0.49823	0.444689
	850	-0.919689	0.428029	0.363883	0.538959	-0.817534	0.464856	-0.61205	0.433318
	852	-0.938787	0.487567	0.261114	0.577916	-0.915627	0.463173	-0.69917	0.502222
	854	-0.769191	0.393492	0.265086	0.640448	-1.14029	0.696492	-0.887057	0.545157
	856	-0.729843	0.400426	0.569503	0.621158	-1.19827	0.747815	-0.812572	0.563039
	858	-0.597318	0.393316	0.601124	0.530909	-1.19275	0.731204	-1.08851	0.545866
	860	-0.433986	0.348351	0.470474	0.589957	-0.885073	0.600677	-0.975302	0.512462
	862	-0.956753	0.545859	0.378522	0.58339	-0.84793	0.564059	-0.814845	0.518441
	864	-0.935889	0.581183	0.667224	0.487581	-0.604305	0.654077	-0.789359	0.552069
	866	-0.747084	0.513374	0.544471	0.416003	-0.648701	0.576387	-0.79743	0.513578
	868	-0.0398005	0.387179	0.0447132	0.390841	-0.713933	0.544045	-0.770717	0.539351
	870	-0.300763	0.535759	0.295516	0.314723	-0.399977	0.600823	-0.557022	0.503881
	872	-0.20597	0.58356	0.358879	0.188284	-0.83027	0.59096	-0.516921	0.489385
	874	-0.340164	0.54986	0.487667	0.285831	-0.766035	0.484034	-0.587043	0.391237
	876	-0.768864	0.702869	0.50565	0.378901	-0.593638	0.472383	-0.724776	0.353205
	878	-0.447752	0.505443	0.843877	0.372436	-0.640538	0.460414	-0.451206	0.420398
	880	-0.336661	0.437306	0.894285	0.456091	-0.599555	0.38975	-0.544975	0.376604
	882	-0.308792	0.598302	0.972734	0.436695	-0.524618	0.476963	-0.598164	0.469379
	884	-0.741648	0.572824	0.897413	0.393377	-0.480298	0.487693	-0.667471	0.419617
	886	-1.17976	0.794904	0.820086	0.348607	-0.633915	0.460774	-0.613081	0.489078
	888	-1.40571	0.729856	0.448049	0.319749	-0.997091	0.313869	-0.889884	0.478003
	890	-1.51148	0.707214	0.406684	0.361794	-0.643973	0.385485	-0.868528	0.512726
	892	-0.897744	0.455877	0.628135	0.41475	-0.758604	0.5281	-0.661894	0.411335
	894	-0.548554	0.496892	0.528912	0.392424	-0.516627	0.390386	-0.40866	0.46408
	896	-0.148938	0.430603	0.754391	0.402936	-0.469755	0.455457	-0.385939	0.492784
	898	0.0281842	0.459483	1.1044	0.561688	-0.739474	0.447932	-0.287305	0.516537
	900	-0.3268	0.520885	1.28512	0.539314	-0.687491	0.564091	-0.320054	0.474329
	902	-0.405167	0.647102	0.814107	0.403657	-1.0332	0.521388	-0.479565	0.405995
	904	-0.612446	0.648872	0.825316	0.352747	-1.06037	0.492932	-0.700486	0.342087
	906	-0.377993	0.51706	0.838546	0.373754	-0.922741	0.471137	-0.615501	0.384407
	908	-0.160231	0.37264	0.514523	0.297706	-0.474888	0.634763	-0.6631	0.418635
	910	-0.365058	0.442041	0.58795	0.357405	-0.34816	0.497064	-0.6112	0.408176
	912	-0.501767	0.364536	0.518817	0.38171	-0.183237	0.510377	-0.755839	0.407085
	914	-0.436048	0.331307	0.408498	0.390432	-0.464765	0.621841	-0.800588	0.3381
	916	-0.377835	0.373354	0.280126	0.373059	-0.974245	0.848223	-0.856491	0.326275
	918	-0.452692	0.565878	0.451791	0.358952	-1.16066	0.858007	-0.693396	0.307774
	920	-0.430588	0.596918	0.653	0.478848	-1.42457	0.791267	-0.925426	0.322531
	922	-0.274568	0.604346	0.547671	0.493992	-1.22886	0.836906	-0.783004	0.391411
	924	-0.933499	0.716335	0.633093	0.568015	-0.743694	0.717389	-0.728879	0.475672
	926	-1.57786	1.17243	1.06443	0.481459	-0.846583	0.706354	-0.615202	0.536226
	928	-1.77844	1.11601	1.17577	0.479947	-0.30267	0.662819	-0.730376	0.427037
	930	-1.78296	1.09339	0.698737	0.429205	-0.0321054	0.684974	-0.816719	0.411564
	932	-0.556589	0.590027	1.26617	0.545567	-0.468879	0.642631	-0.667163	0.427907
	934	-0.501333	0.591512	0.588315	0.364131	-0.537571	0.635464	-0.64704	0.425361
	936	-0.844812	0.690847	0.462882	0.372505	-0.654608	0.600767	-0.885744	0.374175
	938	-0.823445	0.654991	0.663942	0.354717	-0.772472	0.528964	-0.867995	0.375677
	940	-1.73145	0.793272	0.441056	0.435208	-0.853885	0.519477	-0.646714	0.401298
	942	-1.7921	0.802327	0.32065	0.34476	-1.14533	0.48895	-0.518173	0.422237
	944	-1.56229	0.75212	0.521583	0.349317	-1.42031	0.295124	-1.0194	0.448019
	946	-0.987075	0.339799	0.661134	0.365364	-1.09917	0.331757	-0.746314	0.474764
	948	-0.979203	0.392498	0.780365	0.417965	-0.989631	0.353819	-0.650266	0.456815
	950	-0.690759	0.472996	0.831808	0.42741	-1.09907	0.464978	-0.664911	0.439883
	952	-0.654555	0.490517	0.757545	0.449979	-1.31043	0.490249	-0.845153	0.381501
	954	-0.555654	0.519935	0.699434	0.499081	-1.67979	0.51248	-0.819925	0.449826
	956	-0.631476	0.557573	0.852941	0.500955	-1.32098	0.569986	-0.636956	0.494777
	958	-0.297867	0.651139	0.869071	0.43475	-1.13253	0.599466	-0.814931	0.512753
	960	-0.720707	0.700548	0.846966	0.282558	-0.998238	0.608103	-0.903123	0.455802
	962	-0.440255	0.578947	0.709426	0.327745	-0.841973	0.479349	-0.831677	0.472894
	964	-0.376116	0.576942	0.557259	0.402487	-0.783635	0.634261	-0.863582	0.413644
	966	-0.463312	0.57085	0.918993	0.311962	-1.09085	0.424921	-1.02313	0.452643
	968	-0.293038	0.441984	0.854305	0.414833	-1.47325	0.419535	-1.14214	0.388715
	970	-0.4642	0.414493	0.839755	0.564429	-1.37696	0.450225	-1.17723	0.370063
	972	-0.303259	0.525352	0.705873	0.525022	-1.23482	0.523463	-1.11908	0.4245
	974	-0.487012	0.598908	0.881339	0.401709	-1.0554	0.527048	-1.27516	0.471255
	976	-0.0874739	0.77031	0.901958	0.413709	-1.05278	0.525839	-1.35975	0.542345
	978	-0.28653	0.62166	0.786206	0.458059	-1.12479	0.549322	-1.15228	0.52532
	980	-0.366716	0.649329	0.960394	0.493761	-1.03006	0.575839	-1.01858	0.489856
	982	-0.304337	0.566674	1.03404	0.467587	-1.04197	0.456204	-1.08155	0.533855
	984	-0.0529159	0.718942	0.945219	0.494508	-0.802833	0.406294	-1.00864	0.480253
	986	-0.244756	0.648834	0.943152	0.636166	-0.711826	0.440199	-1.24394	0.436753
	988	-0.856018	0.69182	1.30453	0.894424	-0.617466	0.514686	-1.15669	0.464119
	990	-0.553297	0.649703	1.39992	0.864406	-0.283797	0.51469	-1.15452	0.508027
	992	-0.11902	0.572559	0.958015	0.558509	-0.172182	0.571539	-1.12437	0.464262
	994	-0.330882	0.513547	1.15216	0.565367	-0.402008	0.519965	-1.05178	0.488964
	996	-0.656456	0.603257	1.01118	0.568977	-0.279891	0.659378	-0.87163	0.46384
	998	-0.429285	0.657889	0.953594	0.533651	-0.371812	0.627344	-0.875338	0.398993
	1000	-0.271972	0.46791	0.945269	0.511644	-0.591871	0.636932	-1.09729	0.390572
	1002	-0.200085	0.536034	0.918315	0.576237	-0.2972	0.726236	-0.998893	0.457621
	1004	-0.113902	0.651472	0.796055	0.586453	-0.334202	0.704816	-0.91952	0.423227
	1006	-0.338469	0.543611	1.02553	0.577658	-0.611714	0.47415	-1.16674	0.435707
	1008	-0.612169	0.614192	1.00052	0.62562	-0.766799	0.417368	-1.06018	0.433505
	1010	-0.714416	0.721978	1.02651	0.663114	-0.519862	0.526301	-0.802361	0.528172
	1012	-0.876722	0.678922	1.46602	0.811555	-0.599479	0.440999	-0.924924	0.45306
	1014	-1.48799	0.567034	1.45465	0.853133	-0.613655	0.486051	-0.975473	0.466014
	1016	-1.16862	0.530968	1.49658	0.843148	-0.457597	0.467333	-1.19249	0.395925
	1018	-1.01164	0.629999	1.27257	0.854898	-0.449007	0.430921	-1.28554	0.457855
	1020	-0.735474	0.611427	1.18849	0.864139	-0.829376	0.310744	-1.28059	0.398416
	1022	-0.833967	0.547797	0.911263	0.885514	-0.937575	0.454942	-1.17734	0.377132
	1024	-0.91153	0.587319	0.843833	0.766412	-0.867576	0.407451	-1.16921	0.391119
	1026	-0.363667	0.624487	0.498327	0.717055	-1.16382	0.482811	-1.02952	0.403124
	1028	-0.389604	0.505838	0.591354	0.653412	-1.09968	0.625274	-1.08191	0.370698
	1030	-1.95019	0.989142	0.540139	0.704351	-0.582583	0.586649	-0.95064	0.451249
	1032	-2.03619	0.854395	0.400082	0.667742	-0.687197	0.525317	-0.715163	0.500386
	1034	-0.84066	0.614515	0.270759	0.526658	-0.603435	0.476759	-1.01018	0.474889
	1036	-0.788762	0.528258	0.331211	0.480496	-0.535867	0.481526	-1.1552	0.44461
	1038	-1.72796	0.765392	0.490752	0.476295	-0.638612	0.424961	-1.00639	0.599357
	1040	-1.57135	0.79225	0.571443	0.490813	-0.861685	0.488209	-1.21156	0.477617
	1042	-0.532095	0.71336	0.808682	0.500594	-0.776848	0.541084	-1.15893	0.426368
	1044	-0.957482	0.582426	1.11335	0.718632	-0.682268	0.576467	-1.14455	0.443165
	1046	-1.03007	0.623065	0.993498	0.724843	-0.670678	0.575609	-0.932727	0.356199
	1048	-0.754197	0.656047	1.00535	0.735119	-0.739234	0.639301	-0.864624	0.430605
	1050	-0.761038	0.653393	0.978725	0.728891	-0.457139	0.622954	-0.778358	0.423586
	1052	-0.67547	0.638677	0.88535	0.700655	-0.763408	0.632688	-0.879392	0.380171
	1054	-1.68678	1.28517	1.00078	0.701013	-0.654998	0.691342	-0.643997	0.382633
	1056	-1.73809	1.29359	1.06626	0.693844	-0.862409	0.674551	-0.927865	0.415962
	1058	-1.60358	1.28599	1.41602	0.919005	-0.908184	0.598883	-0.794198	0.497585
	1060	-0.491366	0.578968	1.62086	0.91469	-0.683164	0.525595	-0.765693	0.611443
	1062	-0.902661	0.755507	1.80523	0.887185	-0.786363	0.490559	-0.501975	0.602577
	1064	-0.561111	0.579585	1.71992	0.705905	-1.0953	0.464148	-0.517034	0.622609
	1066	-0.723433	0.529783	1.65442	0.603402	-1.49363	0.439795	-0.550558	0.610843
	1068	-0.723802	0.610043	1.38948	0.615318	-0.547505	0.465525	-0.694578	0.565927
	1070	-1.06415	0.685119	0.969996	0.652013	-0.352973	0.5774	-0.823361	0.493838
	1072	-0.41168	0.563763	0.970033	0.665856	-0.73613	0.544599	-0.806778	0.522454
	1074	-0.53894	0.737196	0.942803	0.55849	-0.352732	0.571346	-0.534367	0.607191
	1076	-0.58884	0.807049	1.0546	0.708738	-0.176356	0.566361	-0.670933	0.582188
	1078	-0.502591	0.610563	0.932383	0.621036	-0.356263	0.43791	-0.690348	0.599394
	1080	-0.944718	0.603005	1.09538	0.63891	-0.605628	0.463442	-0.767652	0.676003
	1082	-1.31347	0.692957	1.28047	0.841985	-0.327963	0.370429	-0.806748	0.640088
	1084	-1.11033	0.650793	1.37827	0.772633	-0.395558	0.355631	-0.918144	0.556282
	1086	-1.57404	0.713461	1.24214	0.849237	-0.600123	0.346372	-0.844579	0.585335
	1088	-1.2163	0.636504	1.21349	0.883407	-0.282238	0.598056	-0.825786	0.551234
	1090	-1.11134	0.615644	0.781576	0.648342	-0.278578	0.588366	-0.776662	0.505161
	1092	-1.30426	0.696753	0.96831	0.645591	-0.133635	0.574918	-0.87488	0.487571
	1094	-1.04834	0.637446	1.02597	0.678709	-0.732292	0.425117	-0.975862	0.502938
	1096	-0.83693	0.460104	1.22614	0.655263	-0.663068	0.387396	-0.814335	0.535529
	1098	-0.85494	0.632603	1.35694	0.660975	-0.590597	0.366991	-0.840358	0.533295
	1100	-0.712069	0.617653	1.57601	0.587327	-0.469278	0.422749	-0.717268	0.586772
	1102	-1.02731	0.741446	1.76955	0.563742	-0.835141	0.469412	-0.595486	0.758339
	1104	-1.26122	0.630972	1.36814	0.616105	-0.764739	0.48741	-0.509885	0.881728
	1106	-1.31995	0.584748	1.41067	0.621577	-0.595264	0.417692	-0.725851	0.718472
	1108	-1.52178	0.508471	1.20314	0.661273	-0.649458	0.535546	-0.628183	0.943325
	1110	-1.47653	0.488948	1.01995	0.635532	-0.762247	0.562896	-0.764407	1.03522
	1112	-1.75779	0.563996	1.08269	0.628846	-0.697871	0.527415	-0.732301	0.946621
	1114	-1.4962	0.627396	1.07756	0.654687	-0.339761	0.371327	-0.567818	0.710469
	1116	-1.37388	0.587036	0.836922	0.639565	-0.281968	0.382829	-0.404543	0.916299
	1118	-0.745152	0.528476	0.798408	0.701085	-0.409454	0.383319	-0.298542	0.828947
	1120	-0.957222	0.545105	1.01644	0.835689	-0.513907	0.40593	-0.322916	0.698935
	1122	-1.13312	0.566352	0.998034	0.873102	-0.703815	0.380722	-0.427604	0.709147
	1124	-1.15722	0.675435	1.13245	0.857015	-0.656922	0.405548	-0.667821	0.74843
	1126	-1.34448	0.638944	1.13538	0.832185	-0.807492	0.508683	-0.818058	0.759059
	1128	-1.32493	0.65672	1.29908	0.79737	-0.875832	0.463451	-1.01738	0.696035
	1130	-1.88299	0.766381	1.44071	0.79817	-0.894245	0.453243	-0.982278	0.684504
	1132	-1.5707	0.801888	1.11375	0.687067	-1.02622	0.453395	-1.07191	0.841676
	1134	-0.815695	0.630389	0.0659617	0.541492	-1.06516	0.438782	-1.1801	0.850838
	1136	-0.686712	0.578703	0.102382	0.586279	-0.555497	0.324606	-1.23063	0.877929
	1138	-0.498643	0.522096	0.590706	0.792747	-0.765201	0.421215	-1.10208	0.775079
	1140	-0.850897	0.539973	0.109427	0.457187	-0.817991	0.449856	-1.15404	0.761771
	1142	-1.02378	0.535719	0.736347	0.502131	-0.715912	0.440772	-1.06515	0.777934
	1144	-1.5615	0.492577	0.863666	0.48087	-1.09889	0.431738	-0.93966	0.695762
	1146	-1.4078	0.591647	0.732341	0.484551	-1.01594	0.507253	-0.806263	0.65852
	1148	-1.74956	0.552479	0.607548	0.507093	-1.11271	0.451349	-0.978545	0.611376
	1150	-1.95006	0.95401	0.710205	0.508314	-0.807314	0.449612	-0.775312	0.662381
	1152	-1.99995	0.799339	0.534896	0.543843	-0.966319	0.562798	-0.526382	0.772732
	1154	-1.38758	0.654733	0.5363	0.533931	-0.870224	0.564314	-0.608216	0.762344
	1156	-1.17625	0.646097	0.917024	0.526376	-0.884488	0.58896	-0.713117	0.775307
	1158	-1.44048	0.700845	1.11446	0.525554	-0.602744	0.625402	-0.847745	0.651194
	1160	-1.50654	0.71824	1.04368	0.531427	-1.17336	0.76863	-1.04813	0.664265
	1162	-0.594198	0.595072	1.16322	0.469926	-0.805401	0.542684	-1.22806	0.738504
	1164	-0.405059	0.707676	1.11288	0.534135	-0.65648	0.710001	-0.640801	0.860202
	1166	-1.35108	0.786199	0.644137	0.622722	-1.15034	0.475751	-0.718736	1.03204
	1168	-1.43734	1.36086	0.855177	0.844167	-1.00797	0.389472	-0.55867	1.01602
	1170	-0.772288	0.816725	0.265765	0.59037	-0.280393	0.513198	-0.740363	0.996678
	1172	-0.38156	0.724225	0.601684	0.623394	-0.703772	0.455889	-0.450159	0.990446
	1174	-0.359983	0.777717	0.6122	0.701335	-0.900353	0.447443	-0.650741	0.990259
	1176	-0.422738	0.783171	0.940106	0.665289	-0.997313	0.474965	-0.427274	0.991337
	1178	-0.600513	0.675695	1.02362	0.64092	-1.1337	0.480376	-0.953784	0.957803
	1180	-0.769826	0.650792	0.918776	0.686358	-1.65339	0.659776	-1.45326	0.666499
	1182	-1.1321	0.733626	0.922981	0.581715	-1.56645	0.543835	-2.37604	0.906044
	1184	-1.50699	0.792888	0.764752	0.491713	-1.84811	0.591737	-2.54706	0.960171
	1186	-1.46539	0.788506	0.60132	0.605765	-1.37378	0.603016	-2.29113	1.07102
	1188	-1.18165	0.745246	0.514657	0.535389	-1.36056	0.615435	-2.04327	1.00698
	1190	-1.16863	0.7479	0.796721	0.53241	-1.1452	0.610826	-2.05271	0.848581
	1192	-1.11835	0.734596	0.511149	0.681314	-0.469211	0.583004	-2.0862	1.04395
	1194	-0.838099	0.687713	0.374854	0.750563	-0.568485	0.649874	-2.24171	0.961379
	1196	-0.747209	0.586193	0.554462	0.733515	-0.761463	0.412199	-2.13747	0.846892
	1198	-0.410705	0.471784	0.552295	0.711515	-1.07954	0.370515	-2.18487	0.901751
	1200	-0.237295	0.594085	0.0565134	0.744227	-0.775438	0.378025	-2.14323	0.930494
	1202	-0.791848	0.550753	0.455673	0.805778	-1.1444	0.434403	-2.31867	0.826111
	1204	-1.19895	0.645353	0.347689	0.726322	-1.04916	0.336164	-2.34664	0.849684
	1206	-0.99511	0.696207	0.337636	0.70026	-0.752678	0.380754	-2.9529	0.805696
	1208	-1.18177	0.734717	0.459504	0.725084	-0.5466	0.536793	-2.66901	0.7811
	1210	-1.0107	0.777458	0.793853	0.650816	-0.819389	0.500661	-2.51003	0.808819
	1212	-1.08708	0.748763	0.706851	0.616815	-0.751578	0.460065	-2.54738	0.786491
	1214	-0.819469	0.695663	1.01517	0.653343	-0.898114	0.483074	-2.62087	0.789075
	1216	-0.976538	0.553834	1.20494	0.649749	-0.939068	0.484143	-2.5324	0.820423
	1218	-0.755753	0.678567	0.949322	0.557272	-0.95774	0.470126	-2.9423	0.909489
	1220	-1.0522	0.760349	0.622068	0.499062	-0.961515	0.502316	-2.67668	0.984221
	1222	-0.855381	0.77104	0.683715	0.568914	-0.866805	0.542132	-2.51531	0.972498
	1224	-1.3485	0.782923	0.550225	0.55271	-0.627445	0.564412	-2.60321	0.973599
	1226	-1.59825	0.732685	0.822663	0.691412	-0.768236	0.545794	-2.52451	0.941259
	1228	-1.61058	0.68881	0.739743	0.743088	-0.51955	0.477248	-2.42935	0.892898
	1230	-1.47108	0.721444	1.12143	0.83365	-0.382164	0.519292	-1.96166	0.854001
	1232	-1.34918	0.5363	1.07935	0.831962	-0.875561	0.265294	-1.7782	1.01278
	1234	-1.83098	0.695853	1.08312	0.796794	-1.0268	0.385849	-1.55508	0.971649
	1236	-1.46847	0.765004	1.09511	0.710793	-1.25688	0.365487	-1.62079	0.989639
	1238	-1.54263	0.667529	1.26341	0.910001	-1.14949	0.428574	-1.88221	0.935813
	1240	-2.14671	0.873656	0.863795	0.715971	-1.16687	0.354379	-2.52778	0.847216
	1242	-1.97117	0.866947	0.794394	0.728954	-1.06873	0.579769	-2.51857	0.755235
	1244	-1.38515	0.806994	0.580767	0.622586	-1.04742	0.555382	-2.82111	0.805176
	1246	-1.14762	0.752482	0.827187	0.732873	-0.94648	0.529847	-2.76168	0.768801
	1248	-1.54813	0.740415	0.641895	0.721785	-0.522243	0.468571	-2.47282	0.956558
	1250	-1.30646	0.736124	0.430658	0.65901	-0.829374	0.442565	-2.50011	0.905612
	1252	-1.01255	0.631605	0.257432	0.592201	-0.743416	0.426222	-2.39043	0.935471
	1254	-0.965223	0.611167	0.861668	0.614515	-0.810355	0.504426	-2.38772	0.846207
	1256	-1.42965	0.94888	0.734106	0.686962	-0.528896	0.546846	-2.41589	0.866436
	1258	-0.687441	0.608815	0.472526	0.738077	-0.418011	0.543632	-2.6945	0.766032
	1260	-0.746589	0.679082	0.48155	0.719797	-0.446103	0.51466	-2.6049	0.66429
	1262	-0.970616	0.770581	0.72961	0.692883	-0.692983	0.532073	-2.60113	0.88362
	1264	-2.10371	0.890291	0.716254	0.717591	-0.633042	0.489502	-2.53713	0.929242
	1266	-1.4294	0.949398	0.70598	0.729885	-0.609026	0.490082	-2.29083	0.84108
	1268	-1.39937	0.805571	1.07993	0.799939	-0.527964	0.474508	-2.16707	0.81115
	1270	-2.02188	0.847313	1.16662	0.795654	-0.345875	0.444346	-2.32161	0.915126
	1272	-1.80102	0.78688	1.30698	0.808534	-0.339802	0.441381	-2.47439	0.872374
	1274	-0.578479	0.735212	1.22148	0.75925	-0.466275	0.406626	-2.56145	0.860535
	1276	-0.441707	0.539039	1.15629	0.725991	-0.599439	0.460135	-2.74958	0.891612
	1278	-0.467013	0.767824	1.01273	0.714259	-0.879775	0.474786	-2.66268	0.844613
	1280	-0.0869321	0.614664	0.748579	0.698308	-0.989033	0.346888	-2.7801	0.785126
	1282	0.256444	0.543089	0.477442	0.605639	-0.739049	0.429889	-2.68066	0.698713
	1284	-0.0416071	0.643044	0.589936	0.59785	-1.03304	0.359105	-2.65379	0.742157
	1286	-0.632523	0.652977	0.466388	0.581557	-1.44136	0.450529	-2.45074	0.707689
	1288	-0.568307	0.550916	0.516097	0.768145	-0.792542	0.497609	-2.38218	0.665729
	1290	-0.919273	0.602944	0.610824	0.6387	-1.10896	0.616422	-2.62286	0.692565
	1292	-1.19218	0.788939	0.695783	0.711882	-1.12457	0.634371	-2.50298	0.680467
	1294	-1.03279	0.692801	0.584353	0.747138	-1.092	0.616441	-2.57089	0.78637
	1296	-1.27402	0.657623	0.900928	0.828534	-0.884731	0.536556	-2.88825	0.830062
	1298	-1.61043	0.696449	0.760322	0.809529	-0.45814	0.701382	-2.93675	0.842308
	1300	-1.72695	0.763231	0.739236	0.842706	-0.462655	0.573784	-2.83591	0.887092
	1302	-1.16525	0.569361	0.804037	0.772681	-0.134209	0.635295	-2.77616	0.850314
	1304	-1.57493	0.616443	1.05456	0.799345	-0.121563	0.683267	-2.44147	0.816805
	1306	-2.21954	0.899706	0.89234	0.787691	-0.742351	0.64372	-2.57256	0.730509
	1308	-1.65197	0.58396	0.84186	0.788225	-0.673771	0.648236	-2.35625	0.660825
	1310	-1.18136	0.492924	0.903055	0.797578	-0.727048	0.630289	-2.3579	0.698522
	1312	-1.90732	0.837331	0.464454	0.614894	-0.798146	0.494738	-2.06302	0.661895
	1314	-1.28589	0.67671	0.316367	0.625588	-0.847284	0.659641	-2.20129	0.664888
	1316	-1.64426	0.798499	-0.0821522	0.671491	-1.51115	0.566696	-2.5469	0.68516
	1318	-4.61077	2.09668	-1.19135	0.667409	-2.16359	0.554229	-3.74162	0.672598
