# Supplementary material for: PKCδ is an activator of neuronal mitochondrial metabolism that mediates the spacing effect on memory consolidation
Source: eLife. 2024 Oct 30;13:RP92085. doi: 10.7554/eLife.92085 (PMC11524582; doi:10.7554/eLife.92085)
Supplement: Figure 5—figure supplement 1—source data 1. [file elife-92085-fig5-figsupp1-data1.xlsx]

## Sheet: Fig.S5a
	Time traces										Post-training PKCδ activity
		No RNAi				DAMB RNAi KK110947					No RNAi		DAMB RNAi KK110947
		Control (unpaired)		5x spaced		Control (unpaired)		5x spaced			Control (unpaired)	5x spaced	Control (unpaired)	5x spaced
	Time (s)	Mean	SEM	Mean	SEM	Mean	SEM	Mean	SEM		0.979049	1.0639	1.00565	0.984622
	0	-4.96834	0.840593	-1.78963	1.27205	-4.2473	1.06377	-6.14511	1.23896		0.980888	1.06766	1.01988	0.99424
	2	-3.33223	0.619178	-0.739258	1.52112	-2.94466	0.708619	-4.32539	0.853478		0.980233	1.04605	1.00894	0.996728
	4	-1.978	0.76614	0.894207	1.2423	-2.26435	0.651355	-2.73195	0.33017		1.04297	0.982975	1.00186	0.998111
	6	-2.02761	0.832521	1.21616	1.15009	-1.69716	0.631689	-2.85931	0.337538		0.984905	1.02156	0.992403	0.999789
	8	-2.03809	0.812785	1.21318	1.34928	-1.59517	0.534288	-2.552	0.394066		1.0156	1.01536	1.00232	0.969229
	10	-2.61748	0.766201	1.25612	1.23376	-1.66929	0.51471	-2.84532	0.573835		1.00667	1.01705	0.968279	1.00265
	12	-2.34522	0.842398	1.74242	1.37689	-1.67841	0.581488	-3.1622	0.52347		1.00969	1.02889	1.00067	1.00358
	14	-2.28194	0.747308	1.31533	1.3663	-1.56768	0.797373	-2.79776	0.543997
	16	-1.91898	0.855112	1.60704	1.12973	-1.75267	0.795612	-2.42266	0.542181
	18	-1.77882	0.94359	1.3101	1.08224	-1.70452	0.782562	-2.91436	0.671235
	20	-1.62121	0.900758	1.65147	1.01758	-2.01784	0.779556	-3.00039	0.625515
	22	-1.75243	0.976289	2.39336	0.843685	-2.07205	0.798323	-2.92659	0.570805
	24	-2.04915	1.02665	1.99042	0.937812	-1.69268	0.64482	-2.8873	0.55768
	26	-1.98807	1.02402	1.5071	1.01463	-1.91778	0.597136	-2.93455	0.533268
	28	-1.94664	1.09167	1.32145	0.632799	-2.23938	0.61092	-2.886	0.561138
	30	-2.0577	1.14099	0.403894	1.13123	-2.29781	0.616524	-2.71086	0.47112
	32	-1.91947	1.14358	0.364814	1.16098	-2.01761	0.5725	-2.72982	0.392328
	34	-1.97135	1.11589	0.505805	1.12273	-1.50405	0.517928	-2.76231	0.436363
	36	-1.77924	1.21197	0.552281	1.11561	-1.89516	0.553754	-2.92564	0.59104
	38	-1.48592	1.19832	1.15172	1.05671	-1.71849	0.492302	-3.00557	0.603594
	40	-1.85101	0.937198	1.55092	0.736351	-1.89019	0.5639	-2.46387	0.869622
	42	-1.69385	0.794253	1.55718	0.83806	-2.09528	0.66416	-2.5968	0.857907
	44	-1.74574	0.774936	1.1004	0.925037	-2.08145	0.656933	-2.39084	0.838262
	46	-2.00053	0.791028	1.25532	0.891527	-2.16595	0.580302	-2.14804	0.883854
	48	-2.30041	0.816327	0.820886	0.80445	-2.3241	0.564313	-2.29221	0.872561
	50	-2.45712	0.796751	0.878759	0.81402	-2.09125	0.565503	-2.05656	0.807492
	52	-2.06805	0.767356	0.844539	0.778975	-2.30541	0.589173	-2.13339	0.881169
	54	-2.06084	0.80208	0.840848	0.746701	-2.53321	0.571281	-2.68501	0.478001
	56	-2.17639	0.818211	0.991656	0.858784	-2.37424	0.503281	-3.11295	0.642335
	58	-1.7516	0.809626	1.09181	0.95506	-2.66524	0.616729	-3.20295	0.537643
	60	-2.17397	0.853964	1.56353	0.888207	-2.81199	0.594735	-2.87849	0.53919
	62	-2.1803	0.936655	1.65869	0.823136	-2.75374	0.573262	-2.74448	0.582468
	64	-2.04181	0.785919	1.24557	0.745474	-2.63989	0.591843	-2.92592	0.590868
	66	-1.73591	0.88657	1.15163	0.932632	-2.40854	0.680159	-2.32114	0.828664
	68	-1.44809	0.954221	1.15718	1.22087	-2.29936	0.663457	-1.91373	0.597863
	70	-1.4823	0.987607	0.456769	1.05273	-2.41043	0.691753	-3.10945	0.654723
	72	-1.93609	0.982521	0.994152	0.800146	-2.42351	0.614089	-3.28271	0.714754
	74	-2.43597	1.04941	0.803755	0.989141	-2.28455	0.643684	-2.81779	0.831432
	76	-2.5613	0.960799	0.75737	1.00398	-2.20965	0.574405	-2.95951	0.884325
	78	-2.58162	0.935323	0.68859	1.00556	-2.54949	0.667285	-2.94565	0.787931
	80	-2.90429	0.925926	0.687545	1.10238	-2.36748	0.568569	-2.81232	0.623435
	82	-2.58331	0.889406	0.424205	1.13525	-2.34467	0.483585	-2.65759	0.649469
	84	-2.58404	0.749551	0.551074	1.19704	-2.88944	0.54586	-2.38437	0.705206
	86	-2.81741	0.636096	0.447726	1.09574	-2.764	0.572397	-2.74854	0.743671
	88	-3.3044	0.613323	0.968565	1.07873	-2.7188	0.574706	-2.63205	0.610399
	90	-2.64208	0.559709	0.849229	1.09057	-2.93204	0.533306	-2.11757	0.492192
	92	-2.81038	0.609841	0.419809	1.25536	-3.30288	0.579803	-2.22625	0.48002
	94	-2.3678	0.672858	0.451706	1.30965	-2.6756	0.635488	-2.82997	0.399371
	96	-2.24321	0.661062	-0.105534	1.18819	-2.76275	0.565459	-2.52367	0.377022
	98	-1.88778	0.675113	-0.617402	1.54728	-2.38596	0.614136	-3.00144	0.641056
	100	-2.04089	0.668255	-0.935229	1.58233	-2.25021	0.467554	-2.77985	0.398721
	102	-2.03674	0.607609	0.353574	1.30978	-1.97307	0.342443	-2.74193	0.376591
	104	-1.79688	0.698911	-0.476681	0.965781	-2.12638	0.483788	-2.32887	0.324909
	106	-1.86818	0.666113	0.804926	1.10323	-2.18232	0.612493	-2.47843	0.388924
	108	-2.1528	0.879766	0.402953	0.890063	-2.0009	0.6094	-2.50427	0.371671
	110	-1.78565	0.68703	1.04715	1.19375	-2.39075	0.567166	-2.84456	0.532134
	112	-2.08996	0.676565	0.982461	1.06991	-2.1284	0.641095	-2.42846	0.706273
	114	-2.02833	0.922368	0.759494	1.226	-2.29887	0.587083	-2.01577	1.10992
	116	-1.54607	0.784499	0.0240447	1.27132	-2.1885	0.683054	-3.00152	0.677851
	118	-1.99271	0.803594	-0.727053	1.85292	-2.64176	0.685005	-2.4452	0.744802
	120	-2.63609	1.02688	-1.20884	1.91888	-2.89094	0.794839	-3.20427	0.358334
	122	-3.00248	1.16217	-1.00879	1.97737	-3.36611	0.673505	-3.52081	0.379534
	124	-3.02557	1.00461	-1.12471	1.90254	-3.24807	0.782042	-4.22768	0.405984
	126	-3.23198	1.19193	-1.09668	1.64962	-2.94057	0.649382	-3.94004	0.458532
	128	-3.01147	1.0084	-0.82562	1.10751	-2.67214	0.535228	-3.60873	0.733543
	130	-2.46704	0.764053	-0.47342	0.844952	-2.72312	0.54726	-3.5226	0.671226
	132	-2.55428	0.756694	-0.710714	0.796904	-2.87703	0.696251	-3.54192	0.860362
	134	-2.56547	0.888816	-0.411455	0.722743	-3.03615	0.704491	-3.28196	0.780586
	136	-1.77563	0.880595	-0.413217	0.69544	-2.82166	0.836961	-3.18844	0.535892
	138	-1.87496	0.802812	-0.213267	0.685617	-3.02053	0.801013	-2.8903	0.37073
	140	-1.82837	0.774291	-1.22718	1.1885	-3.11384	0.82098	-2.92329	0.901197
	142	-1.61669	0.886301	-1.11829	1.12422	-3.27008	0.567382	-2.95736	0.899585
	144	-2.05238	0.824761	-0.31869	0.950181	-2.6135	0.583559	-3.25602	0.877324
	146	-2.18296	0.966078	-0.227034	0.944967	-2.99951	0.54781	-3.07252	1.10914
	148	-2.08114	0.937492	-0.199776	0.98297	-2.73958	0.444926	-3.62983	0.950011
	150	-1.56837	0.991318	-0.326288	0.853754	-2.87007	0.478036	-3.23377	0.762661
	152	-1.69738	1.03881	-0.277227	0.939689	-2.72206	0.423552	-2.33672	0.711558
	154	-1.99843	1.03968	-0.340173	0.937243	-2.43904	0.372311	-2.54706	0.72479
	156	-1.98107	1.03058	-0.0515688	1.04607	-2.65885	0.400101	-2.53714	0.773624
	158	-2.10384	1.02506	0.575629	1.00219	-2.26586	0.358157	-2.87374	0.732321
	160	-1.85139	0.785803	0.335343	1.10416	-2.26392	0.328292	-2.34242	1.16846
	162	-1.57631	0.761895	0.365967	1.048	-2.1392	0.401719	-2.30725	1.13734
	164	-0.930837	0.811865	0.535552	0.941674	-2.07644	0.34166	-2.36098	0.992919
	166	-1.10233	0.805602	0.301049	0.969703	-1.98813	0.368884	-2.10969	0.971762
	168	-1.03578	0.850936	0.197937	0.95892	-2.17649	0.35556	-2.1495	0.802198
	170	-1.06671	0.847345	0.799339	0.587253	-2.04122	0.393059	-2.06072	0.602758
	172	-1.14891	0.702301	0.728146	0.618724	-1.9413	0.260085	-1.91927	0.534666
	174	-1.26859	0.607603	0.904362	0.730508	-1.88091	0.295027	-1.47832	0.526762
	176	-1.52799	0.536136	0.549035	0.751846	-1.84595	0.475754	-1.05718	0.708795
	178	-1.5409	0.527796	0.637409	0.664524	-1.59838	0.307952	-1.1694	0.888703
	180	-1.4537	0.584155	0.331182	0.891976	-2.00252	0.226213	-1.3376	0.901037
	182	-1.49244	0.691265	1.05976	0.701722	-1.56179	0.450379	-2.14681	0.895889
	184	-1.38652	0.670881	1.07742	0.79617	-1.58721	0.45025	-2.06961	0.725088
	186	-1.20424	0.512949	1.23755	0.648737	-1.62973	0.379782	-2.37845	0.731964
	188	-0.664031	0.487299	1.23688	0.667585	-1.59439	0.425565	-1.80852	0.720348
	190	-0.724684	0.439183	1.27203	0.507702	-1.12336	0.500721	-1.71871	0.658189
	192	-0.568901	0.426974	0.189799	0.626759	-0.885469	0.462174	-1.00377	0.582694
	194	-0.481676	0.470365	0.0203352	0.872695	-0.910044	0.438491	-0.918315	0.4868
	196	-0.588294	0.634818	0.487237	0.778619	-0.523573	0.516071	-1.17491	0.472127
	198	-0.969034	0.692506	0.453531	0.784493	-0.797744	0.491987	-1.57712	0.430567
	200	-1.00941	0.693887	1.00261	0.995815	-0.870434	0.501885	-1.74611	0.402924
	202	-1.12191	0.686434	1.54796	1.05621	-0.617869	0.454476	-1.78761	0.537428
	204	-0.991307	0.710378	1.30779	0.975982	-1.15258	0.455615	-1.91939	0.408122
	206	-0.656919	0.76777	1.64373	0.90147	-1.0086	0.403948	-1.68568	0.441854
	208	-1.03198	0.594219	2.03349	0.695595	-0.888098	0.513886	-1.3662	0.580053
	210	-0.922666	0.515664	1.7892	0.819204	-0.946069	0.546014	-1.31586	0.606496
	212	-1.02176	0.5127	1.06287	0.973383	-0.99442	0.526164	-0.780448	0.439838
	214	-1.00247	0.599975	0.553144	0.803988	-0.821091	0.544213	-0.917394	0.580398
	216	-0.920873	0.763062	0.593893	0.735785	-1.09028	0.500839	-1.16066	0.749368
	218	-0.703429	0.766053	0.653955	0.714703	-0.921011	0.335857	-0.828088	0.929678
	220	-0.460059	0.689223	0.644934	0.62338	-0.431361	0.434989	-0.713094	1.00252
	222	-0.565952	0.732375	0.916868	0.691757	-0.649733	0.511832	-1.40602	0.667343
	224	-0.381414	0.692166	1.10971	0.63507	-0.66311	0.52502	-0.946787	0.802145
	226	0.00517823	0.684948	0.370907	0.813752	-0.616835	0.502435	-1.401	0.502079
	228	-0.170016	0.5111	0.3997	0.893346	-0.747786	0.644171	-1.39298	0.625202
	230	-0.190386	0.559827	0.41364	0.755326	-1.0242	0.529706	-1.48811	0.569352
	232	-0.362163	0.653814	0.656433	0.880258	-1.01982	0.461399	-1.4894	0.723444
	234	-0.167195	0.576162	0.587625	0.874175	-0.836407	0.481481	-1.3977	0.684937
	236	-0.654264	0.593944	0.841154	1.09554	-1.09345	0.410282	-1.16946	0.662449
	238	-0.545513	0.679608	0.990304	1.02634	-0.802466	0.43847	-1.15354	0.562892
	240	-0.580584	0.615599	0.572095	1.07951	-0.92483	0.539278	-0.881796	0.542684
	242	-0.64213	0.521255	0.65973	0.852553	-0.819795	0.294448	-1.17017	0.443275
	244	-0.643484	0.520153	0.985641	0.86157	-0.596043	0.291651	-0.506279	0.593823
	246	-0.632857	0.534885	0.85493	0.693056	-0.576896	0.319524	-0.710442	0.648689
	248	-0.424509	0.494987	0.953991	0.584781	-0.911648	0.40164	-0.748744	0.538213
	250	-0.631022	0.374854	0.7369	0.4866	-0.938293	0.544167	-0.94036	0.596151
	252	-0.660805	0.379675	0.515568	0.621866	-0.933192	0.579277	-1.14652	0.719574
	254	-0.484041	0.390784	0.48647	0.685157	-1.25704	0.606974	-1.44182	0.666756
	256	-0.112195	0.456529	0.587303	0.723282	-1.46119	0.486451	-1.65154	0.728456
	258	-0.0689691	0.378602	0.385027	0.742121	-1.49108	0.47043	-1.25697	0.730008
	260	-0.532653	0.577467	0.4329	1.02288	-1.29284	0.535783	-0.953071	0.678637
	262	-0.608332	0.548439	1.10982	0.963985	-1.00749	0.459286	-1.10155	0.691243
	264	-0.688005	0.475433	1.38476	0.992491	-0.949006	0.395987	-1.12296	0.711316
	266	-1.1311	0.359292	1.20733	1.24067	-0.494765	0.29755	-0.83038	0.567294
	268	-0.801229	0.352048	1.36216	1.14309	-0.29359	0.239033	-0.889626	0.587372
	270	-1.0153	0.322996	0.900595	1.0297	-0.29088	0.36463	-1.09902	0.580039
	272	-0.754718	0.397707	1.02884	0.823278	-0.495246	0.339388	-0.826264	0.34851
	274	-0.682279	0.428185	1.408	0.795527	-0.639467	0.41925	-0.728369	0.267806
	276	-0.59022	0.3483	1.48086	0.709783	-0.602384	0.415232	-0.566668	0.412316
	278	-0.571096	0.545755	0.789416	0.838032	-0.481026	0.476454	-0.70761	0.47944
	280	-0.541759	0.712999	0.690805	0.779645	-0.167469	0.440968	-0.588063	0.382836
	282	-0.130123	0.742563	0.363377	0.760361	-0.402861	0.337138	-0.590521	0.509872
	284	-0.204616	0.816958	0.716384	0.942074	-0.342687	0.274987	-0.215615	0.435933
	286	-0.253414	0.861303	0.335985	0.713591	-0.314498	0.317669	-0.72186	0.715997
	288	-0.0636531	0.736345	1.2582	0.862168	-0.292472	0.336545	-0.580856	0.487081
	290	-0.131761	0.739782	1.56889	0.759302	-0.436813	0.40679	-0.519961	0.468091
	292	-0.201941	0.453235	1.46951	0.865617	-0.475684	0.284694	-0.767071	0.582912
	294	-0.114794	0.489299	1.41628	0.932513	-0.627967	0.308096	-0.818568	0.622572
	296	-0.114065	0.546292	1.5001	1.1045	-0.543357	0.377402	-1.01283	0.586649
	298	-0.122972	0.57318	1.17832	0.909583	-0.350514	0.500748	-1.09292	0.640386
	300	-0.216777	0.523583	1.22078	0.87996	-0.154725	0.382121	-1.21496	0.634112
	302	-0.18032	0.465498	1.11179	1.12647	-0.303137	0.367447	-1.32176	0.590077
	304	-0.458034	0.44872	0.916833	1.18135	-0.304513	0.317565	-1.20657	0.507419
	306	-0.352359	0.411008	0.895362	1.17422	-0.418573	0.308353	-0.788086	0.535628
	308	-0.452175	0.589161	1.00308	1.00706	-0.612085	0.388972	-0.914092	0.533052
	310	-0.403442	0.582556	0.218006	1.20326	-0.906553	0.456359	-1.22562	0.555151
	312	-0.480292	0.444119	0.0913223	0.941641	-1.27196	0.605935	-1.1092	0.540543
	314	-0.365375	0.464879	0.108727	0.930774	-1.12113	0.60257	-1.3404	0.743126
	316	-0.508752	0.447005	0.283478	0.88337	-1.38657	0.647712	-1.32563	0.732434
	318	-0.291755	0.482832	0.452617	0.901765	-1.23442	0.534805	-1.139	0.713582
	320	-0.324564	0.469801	0.283958	0.849758	-0.879673	0.475484	-1.02243	0.606115
	322	-0.0463264	0.488391	0.730784	0.840418	-0.642059	0.702233	-1.21927	0.618019
	324	-0.839263	0.507886	0.784745	0.546032	-0.531017	0.589594	-0.775905	0.477664
	326	-0.219063	0.534542	0.454642	0.539836	0.0185369	0.579712	-0.84698	0.407888
	328	-0.356171	0.457161	0.297082	0.461176	0.2611	0.65667	-0.728866	0.46192
	330	-0.664235	0.475007	0.125392	0.435974	0.352738	0.588416	-0.892072	0.476422
	332	-0.929088	0.484551	1.03925	0.902669	0.361626	0.533893	-0.874483	0.324897
	334	-0.842825	0.552899	0.727323	1.05342	0.00866958	0.410808	-1.11977	0.380641
	336	-0.627894	0.507377	0.96621	0.959103	-0.391858	0.478871	-1.08878	0.510451
	338	-0.620844	0.356307	0.305021	0.6547	0.017163	0.436435	-0.789722	0.597751
	340	-0.194307	0.519011	-0.107742	0.904025	-0.138859	0.481624	-0.575736	0.643236
	342	0.341769	0.538659	-0.0409932	0.807821	-0.104299	0.459414	-0.224993	0.703205
	344	0.131072	0.653989	0.0903677	0.320365	-0.134971	0.494489	-0.700211	0.691671
	346	-0.0314021	0.645402	0.385066	0.838958	-0.333824	0.440906	-0.55041	0.675584
	348	0.217928	0.578235	0.344235	0.839885	-0.595014	0.393337	-0.764924	0.486834
	350	-0.0703646	0.610926	-0.0312724	0.938244	-0.340722	0.335194	-1.12858	0.4919
	352	0.129701	0.511578	-0.0828827	0.925327	-0.436696	0.401364	-1.40686	0.422136
	354	0.0282878	0.515543	0.307082	0.816518	-0.169171	0.282561	-1.18773	0.373357
	356	0.166977	0.398468	0.753584	0.996223	0.191288	0.45241	-1.11858	0.211922
	358	0.179133	0.414408	0.888398	1.02223	0.209017	0.451803	-1.33631	0.201078
	360	0.38523	0.304902	0.323573	0.929919	0.0424779	0.37073	-1.2807	0.256699
	362	-0.079592	0.40411	0.750961	0.493511	-0.0804013	0.378331	-1.23167	0.372684
	364	0.128632	0.428628	0.817853	0.691038	-0.0122138	0.298803	-1.49031	0.298646
	366	-0.274795	0.28153	0.178944	0.467298	-0.120157	0.312111	-1.53764	0.345386
	368	0.0618183	0.346415	0.0777555	0.487225	-0.143655	0.502235	-1.37504	0.402046
	370	0.238317	0.424253	0.448895	0.621262	-0.231447	0.474865	-1.39159	0.44196
	372	0.375822	0.325398	0.398299	0.639725	-0.532729	0.470427	-1.45339	0.479623
	374	-0.0674391	0.267086	0.15354	0.207164	-0.567051	0.500428	-1.11269	0.485913
	376	-0.312358	0.27181	0.65553	0.39026	-0.370406	0.530708	-1.13451	0.504109
	378	-0.576112	0.276131	0.751422	0.30385	-0.134406	0.434678	-1.08181	0.488267
	380	-0.728073	0.358318	0.590419	0.282364	-0.0120316	0.529185	-0.68539	0.327916
	382	-0.613164	0.524002	0.621868	0.317417	-0.0774852	0.505613	-0.496469	0.408988
	384	-0.362615	0.607149	0.960902	0.431786	0.148027	0.515676	-0.297154	0.524198
	386	0.112186	0.522972	1.18888	0.534203	-0.157351	0.47782	-0.00559452	0.492876
	388	0.313269	0.610452	1.43968	0.574291	-0.0884939	0.445855	-0.124968	0.51849
	390	0.313238	0.592257	1.48517	0.560535	-0.497696	0.501396	-0.0525522	0.474131
	392	0.405068	0.799033	1.27497	0.338673	-0.634029	0.509392	-0.23521	0.480533
	394	0.215299	0.537651	1.9284	0.679838	-0.592609	0.409086	-0.396096	0.219691
	396	-0.110839	0.524815	1.48702	0.586493	-0.501489	0.477215	-0.347498	0.22316
	398	-0.139721	0.452073	0.92485	0.582702	-0.450776	0.471834	-0.25889	0.27648
	400	-0.155309	0.457948	0.302488	0.605258	0.269477	0.480433	-0.493502	0.440397
	402	0.294819	0.444918	0.796514	0.480716	0.199879	0.505907	-0.208076	0.440835
	404	0.244069	0.425829	1.11394	0.3559	-0.131113	0.562377	-0.583341	0.650895
	406	0.349978	0.287078	0.58834	0.253453	0.100439	0.434076	-0.56675	0.513988
	408	-0.0274805	0.403448	0.718754	0.316913	0.109625	0.368087	-1.22643	0.540115
	410	0.0938226	0.435247	0.777118	0.397627	-0.38547	0.457908	-1.22331	0.483669
	412	0.154518	0.478558	0.479419	0.452575	-0.501331	0.476409	-1.15346	0.428215
	414	-0.0784853	0.549943	0.253607	0.490923	-0.407218	0.473388	-1.1375	0.442823
	416	-0.623212	0.390162	0.446376	0.447635	-0.312211	0.4983	-0.721291	0.458101
	418	-0.0470574	0.299268	0.571453	0.399081	-0.344555	0.547197	-0.340516	0.415257
	420	-0.504603	0.410656	0.401448	0.241192	-0.459178	0.547074	-0.666617	0.458832
	422	-0.545669	0.451505	0.89792	0.718792	-0.41775	0.470643	-1.34736	0.536129
	424	-0.376016	0.473697	0.0090492	0.290172	-0.689571	0.473498	-0.814698	0.472189
	426	-0.107947	0.483436	0.491437	0.446343	-0.725633	0.519974	-1.51016	0.509997
	428	-0.164349	0.426815	-0.0447657	0.299939	-0.911033	0.355184	-1.4497	0.525476
	430	0.0448868	0.2951	-0.247614	0.393121	-0.809727	0.329526	-1.03311	0.361209
	432	0.246501	0.27208	0.450427	0.60377	-0.648071	0.373651	-1.05996	0.486989
	434	0.217179	0.309732	0.301793	0.511255	-0.373484	0.336314	-0.859012	0.458621
	436	-0.204893	0.243482	0.295435	0.517912	-0.312757	0.366144	-1.11605	0.539613
	438	-0.424302	0.30052	0.992571	0.767524	-0.178242	0.330307	-1.00304	0.636706
	440	-0.803631	0.447628	1.21351	0.56429	-0.0490958	0.367862	-0.919622	0.458643
	442	-0.98657	0.520869	0.437193	0.451347	0.165004	0.35998	0.0991121	0.635448
	444	-0.799532	0.485188	0.407128	0.480605	0.0216019	0.378228	-0.919118	0.392013
	446	-0.449405	0.499869	-0.0851267	0.498051	-0.164447	0.291348	-1.20022	0.411187
	448	-0.420491	0.344664	-0.0807278	0.307946	0.0847567	0.396724	-0.859195	0.41644
	450	-0.0607189	0.335486	0.0133378	0.163939	-0.0929497	0.393338	-0.338508	0.797884
	452	0.0870004	0.201033	0.577323	0.366765	-0.510016	0.317072	-0.305654	0.794072
	454	0.210976	0.33961	0.130497	0.198802	-0.649126	0.302091	-0.259301	0.653393
	456	0.186062	0.398279	0.719815	0.358108	-0.58397	0.36403	-0.0184017	0.664191
	458	-0.227673	0.407062	0.53245	0.420724	-0.630598	0.244135	0.0535504	0.642077
	460	-0.0918096	0.48597	0.310036	0.199484	-0.359906	0.265978	-0.33874	0.403099
	462	-0.00672738	0.494115	-0.0126939	0.361693	-0.134083	0.198658	-0.505793	0.338344
	464	-0.0592674	0.46571	-0.232051	0.359245	-0.123462	0.195397	-0.926859	0.323138
	466	-0.356238	0.599934	-0.386802	0.47186	-0.183384	0.223013	-1.33671	0.59938
	468	-0.448347	0.550733	-0.758084	0.436956	-0.286029	0.231137	-0.904217	0.741991
	470	-0.553344	0.428302	-0.709726	0.448881	-0.399655	0.304583	-1.29089	0.870519
	472	-0.282728	0.368942	-0.194798	0.439462	-0.633293	0.338784	-1.10527	0.82817
	474	-0.592341	0.270227	-0.0656852	0.508965	-0.33186	0.32904	-0.317417	0.483543
	476	-0.496572	0.255844	-0.231909	0.511669	-0.550799	0.260722	-0.205108	0.579249
	478	-0.648471	0.196921	0.225675	0.401505	0.0121288	0.358727	0.207013	0.49205
	480	-0.639928	0.208382	0.242412	0.397868	-0.322279	0.213077	0.305174	0.57948
	482	-0.461532	0.278175	0.149248	0.400967	0.166663	0.314979	0.0343906	0.498174
	484	-0.244247	0.344765	0.143696	0.337527	0.217261	0.338681	0.0523987	0.373122
	486	-0.0609642	0.28953	-0.10801	0.577851	0.0104045	0.349963	0.00596782	0.331304
	488	-0.0186998	0.348987	0.0396756	0.608311	-0.225341	0.326993	0.121195	0.453381
	490	-0.163279	0.327599	0.270659	0.280011	0.0353939	0.246559	0.222337	0.479032
	492	-0.0930363	0.292804	0.356807	0.313499	-0.275947	0.240909	0.0583946	0.465313
	494	-0.124775	0.35798	0.189586	0.321867	-0.294963	0.284979	0.105108	0.430005
	496	-0.242479	0.434796	-0.644871	0.583685	-0.254632	0.333584	0.221282	0.665351
	498	-0.276614	0.458157	-0.645981	0.592658	-0.231128	0.37793	0.160754	0.396149
	500	-0.0831988	0.471545	-0.721759	0.568767	-0.273949	0.447556	0.209048	0.405762
	502	0.540014	0.492892	-0.220543	0.298757	-0.443139	0.289287	0.0629813	0.358492
	504	0.533216	0.468274	0.280284	0.265694	-0.177103	0.286126	-0.151853	0.266343
	506	0.409654	0.393522	0.644601	0.271145	-0.293985	0.196046	-0.146685	0.426933
	508	0.393945	0.318882	0.756148	0.416187	-0.371608	0.188916	-0.0863837	0.342041
	510	0.499367	0.386178	0.905669	0.483368	-0.672598	0.275979	-1.09667	0.235231
	512	0.399525	0.358318	0.533089	0.270961	-0.537757	0.34608	-0.983036	0.591456
	514	0.528779	0.348688	-0.264288	0.641761	-0.428788	0.338358	-0.999102	0.517985
	516	0.112363	0.493121	-0.246226	0.567973	-0.42211	0.332121	-0.804159	0.448659
	518	-0.178797	0.537266	-1.0155	0.784765	-0.117323	0.335249	-0.328071	0.510361
	520	0.0631374	0.602556	-0.714179	0.780019	0.000745635	0.329747	-0.176119	0.478358
	522	0.256677	0.62717	-0.42246	0.642856	-0.0585499	0.349084	-0.0499856	0.393318
	524	0.519326	0.413142	-0.356311	0.652374	-0.207169	0.357275	-0.258959	0.429529
	526	-0.091412	0.443262	0.226861	0.597596	-0.246821	0.359271	0.0823024	0.478935
	528	0.103299	0.333566	0.639476	0.371768	-0.0699868	0.413545	0.220515	0.604458
	530	-0.00812947	0.366498	0.698047	0.606479	-0.438942	0.400779	0.872522	0.901347
	532	-0.161492	0.311034	0.670367	0.642202	-0.0978042	0.337963	0.362008	0.647966
	534	0.2403	0.337604	1.28553	0.389869	-0.0975078	0.429822	0.219019	0.773158
	536	0.0288146	0.413618	0.806914	0.636533	-0.198561	0.291066	-0.445729	0.385483
	538	0.0740781	0.465862	1.06493	0.577244	0.119445	0.321379	-0.44692	0.301608
	540	0.0607535	0.440915	0.239147	0.675713	0.200447	0.373416	-0.768821	0.369352
	542	-0.207317	0.304073	0.099869	0.241158	0.357591	0.421581	-1.02174	0.380084
	544	0.197141	0.324773	0.1234	0.541063	0.623819	0.315733	-0.694701	0.402664
	546	0.131631	0.334574	0.0769696	0.556047	0.247486	0.198508	-0.566883	0.433697
	548	0.138646	0.255851	0.149117	0.36625	0.545467	0.203667	-0.701288	0.35539
	550	0.247379	0.40505	0.278177	0.263691	0.0192108	0.349064	-0.674805	0.345681
	552	0.465633	0.42189	-0.0131779	0.215597	0.172077	0.46797	-0.185575	0.310513
	554	0.174767	0.581689	0.372741	0.602678	0.0399409	0.347954	-0.131786	0.384289
	556	0.0460002	0.645261	-0.102423	0.44902	0.127837	0.34342	-0.172476	0.286922
	558	0.356925	0.576754	0.185048	0.436428	0.0352942	0.269173	0.132058	0.263078
	560	-0.528454	0.209602	-0.0138011	0.515492	0.219517	0.241031	0.172516	0.237384
	562	-0.433925	0.223437	0.492754	0.531964	0.313482	0.319593	0.0877684	0.271705
	564	-0.310497	0.324761	0.189496	0.590048	0.214827	0.474415	0.409758	0.205504
	566	0.0213696	0.324757	0.110402	0.353937	-0.178231	0.384215	0.271206	0.221661
	568	0.0339065	0.302844	-0.391781	0.40119	-0.156396	0.413425	-0.364359	0.429087
	570	0.235194	0.341511	0.0750452	0.276883	-0.455235	0.47957	-0.21844	0.286487
	572	0.149642	0.326262	-0.122638	0.367014	-0.790076	0.39555	0.352909	0.620255
	574	-0.2366	0.323851	-0.00072651	0.351666	-0.714146	0.483065	-0.00807054	0.637282
	576	-0.065212	0.360579	-0.552029	0.606486	-0.199477	0.38302	-0.258942	0.262327
	578	-0.233449	0.248636	-0.565419	0.574661	-0.101193	0.312431	0.218672	0.329292
	580	-0.119523	0.378441	-0.920339	0.502017	0.15795	0.223216	-0.130153	0.31657
	582	0.0543164	0.322669	0.319976	0.482793	0.186563	0.322768	0.046493	0.284901
	584	0.270668	0.296464	0.422439	0.441359	0.163343	0.432066	0.270505	0.254048
	586	0.337663	0.31689	0.128549	0.287185	0.183491	0.466447	0.206109	0.273866
	588	0.0514191	0.396461	0.775316	0.634768	-0.114008	0.489503	-0.226875	0.684282
	590	0.202805	0.228025	0.697759	0.538592	-0.0588637	0.366176	-0.264811	0.62479
	592	-0.109129	0.33593	0.340128	0.622075	-0.131157	0.373511	-0.471432	0.603406
	594	0.0430626	0.366727	0.205298	0.262025	0.0218678	0.311408	-0.468496	0.544651
	596	0.192241	0.352075	-0.354887	0.498056	-0.0215109	0.280893	0.14819	0.278566
	598	0.129882	0.327741	0.274865	0.410601	-0.00603999	0.382083	-0.314606	0.235392
	600	0.458761	0.214208	0.260158	0.427865	-0.155446	0.404411	-0.345939	0.230882
	602	0.653107	0.44716	0.313213	0.469943	-0.472898	0.383447	-0.151184	0.157335
	604	0.584428	0.360037	-0.0734403	0.469958	-0.434712	0.396401	-0.250401	0.658165
	606	0.415578	0.32255	0.159483	0.46379	-0.210143	0.265992	-1.02686	0.914595
	608	0.530872	0.301332	0.0371335	0.625047	-0.492167	0.235954	-0.735565	1.16602
	610	0.336584	0.391196	-0.0988274	0.775979	-0.224532	0.216167	-0.926556	1.16143
	612	0.0724003	0.425588	0.286612	0.432952	-0.081807	0.198927	-0.524277	0.818614
	614	-0.231871	0.368719	0.361787	0.459711	-0.302184	0.163718	-0.275164	0.621094
	616	-0.281717	0.374514	0.200195	0.49181	-0.117447	0.191126	1.05133	0.345516
	618	-0.584968	0.334341	0.466315	0.615151	0.0531653	0.201198	0.797175	0.578852
	620	-0.532621	0.23873	0.268404	0.659609	0.0232559	0.19801	0.594896	0.683192
	622	-0.496787	0.15862	1.28458	0.749176	0.0393535	0.239342	0.491902	0.581476
	624	-0.41139	0.27411	1.1098	0.684662	0.0940504	0.256901	0.389798	0.435081
	626	-0.295374	0.240959	1.1712	0.758235	0.0171905	0.255416	0.229612	0.560248
	628	0.0799826	0.204152	1.1345	0.745349	-0.117985	0.144576	0.376673	0.51721
	630	0.0884336	0.195418	0.577877	0.520288	-0.448022	0.312333	-0.0229922	0.419197
	632	0.00551312	0.236134	-0.317149	0.467795	-0.31723	0.197591	-0.571168	0.438689
	634	-0.0249123	0.308274	0.889583	0.544969	-0.274061	0.313906	-0.608708	0.435929
	636	-0.0145137	0.22009	-0.252394	0.581904	-0.0930684	0.211449	-0.693005	0.302228
	638	-0.19681	0.180714	-0.68568	0.481127	0.220466	0.143192	-0.207191	0.386011
	640	-0.281402	0.185048	0.221901	0.894067	-0.0322499	0.332348	0.246913	0.276994
	642	-0.0885302	0.379398	-1.14926	0.47456	0.284479	0.26065	0.157415	0.289122
	644	-0.166128	0.39441	-1.56108	0.403978	0.591711	0.210835	0.0369676	0.309133
	646	-0.298511	0.201787	-1.46561	0.301317	0.258202	0.293065	-0.0311323	0.336521
	648	-0.0542144	0.253896	-0.574831	0.259478	0.22942	0.257183	0.00474001	0.278288
	650	0.158548	0.369072	-0.41702	0.259462	0.0847676	0.220539	0.0732911	0.22533
	652	0.0139085	0.377511	-0.655405	0.325446	0.337905	0.224303	0.106578	0.287835
	654	0.141613	0.374135	-0.0333588	0.405171	0.461058	0.302107	0.109897	0.416524
	656	0.178619	0.325971	0.0329444	0.43649	0.512194	0.300653	0.0894848	0.454431
	658	0.131722	0.436196	0.0182757	0.402175	0.0706837	0.260903	0.147465	0.346214
	660	0.328802	0.358912	0.320619	0.431408	0.0949763	0.261644	-0.00403158	0.597593
	662	0.24702	0.3	0.518615	0.437782	-0.450845	0.151333	-0.425072	0.284973
	664	0.0134295	0.325627	0.388308	0.457806	-0.432394	0.250396	-0.11659	0.181102
	666	0.072343	0.333299	0.47028	0.440202	-0.574568	0.180959	-0.770362	0.481397
	668	0.0385115	0.339044	0.310459	0.622971	-0.581904	0.181486	0.18516	0.283036
	670	0.348347	0.355993	0.111114	0.708298	-0.379739	0.168886	0.160617	0.351654
	672	0.801298	0.520235	0.0671321	0.903855	-0.422928	0.269483	-0.12259	0.289442
	674	0.787225	0.482228	-0.415324	0.724604	-0.128939	0.302155	0.0863525	0.410692
	676	0.59444	0.399401	-0.81781	0.568484	0.0497223	0.145439	-0.0688863	0.330977
	678	0.701055	0.479945	-0.833023	0.626252	-0.179557	0.24573	-0.835716	0.301274
	680	0.397561	0.516437	-0.796638	0.692373	-0.252362	0.261328	-1.02252	0.510013
	682	0.132488	0.38181	-0.432695	0.703409	-0.06302	0.30328	-0.861323	0.7057
	684	-0.255618	0.199295	-0.72376	0.558593	-0.0644886	0.299771	-0.691397	0.401894
	686	0.0922532	0.210136	-0.993336	0.571763	-0.146492	0.245617	-0.444061	0.488472
	688	0.105511	0.16545	-0.791503	0.557877	0.178606	0.29524	-0.134446	0.396374
	690	-0.206891	0.259601	-0.691645	0.697707	0.0648457	0.301355	0.191361	0.386246
	692	-0.46138	0.229792	-0.279972	0.611524	-0.224076	0.301987	-0.14452	0.32984
	694	-0.654426	0.259669	-0.515226	0.59251	-0.258753	0.351022	0.0156261	0.274812
	696	-0.344856	0.326389	0.270136	0.457056	-0.117018	0.347571	-0.0954504	0.254047
	698	-0.174364	0.379428	0.331028	0.435285	0.0109698	0.490854	-0.332296	0.304056
	700	-0.147414	0.348855	0.33944	0.518003	0.161183	0.278159	-0.419113	0.410207
	702	-0.194855	0.217708	0.295215	0.50192	0.291619	0.267829	-0.401285	0.508396
	704	-0.0541505	0.302125	0.544658	0.471329	0.161304	0.312869	-0.295492	0.341915
	706	-0.196481	0.21399	0.768231	0.416103	-0.044888	0.274592	-0.473334	0.565169
	708	0.276315	0.223111	0.993544	0.399712	-0.058832	0.293214	-0.489056	0.222127
	710	0.597077	0.183785	0.946586	0.329739	0.0858844	0.257376	-0.398132	0.266426
	712	0.760158	0.221885	1.02998	0.248489	-0.0724102	0.284182	-0.0196727	0.303455
	714	0.839039	0.134612	0.699135	0.54845	-0.0754251	0.306299	-0.309438	0.484123
	716	0.803882	0.159584	0.598644	0.538038	0.0204795	0.371837	0.102216	0.312758
	718	0.689055	0.356642	0.244879	0.553014	-0.253282	0.271604	0.10186	0.362496
	720	0.502293	0.414182	0.163095	0.421963	0.0736502	0.254786	0.0583438	0.446229
	722	0.419769	0.285516	0.706423	0.623653	-0.0926988	0.261558	0.555012	0.20013
	724	0.137716	0.324805	0.536597	0.658863	0.125868	0.28587	1.08132	0.5113
	726	0.270241	0.327379	0.600583	0.649056	0.307284	0.223594	0.701843	0.651156
	728	0.147286	0.266516	0.22156	0.710095	0.0935583	0.20189	0.291762	0.404115
	730	0.0910871	0.434411	0.264443	0.651119	0.355153	0.153567	-0.295364	0.405108
	732	0.0529154	0.504009	-0.418955	0.532115	0.68478	0.204494	-0.374872	0.469946
	734	0.328542	0.346423	-0.533507	0.542556	0.588271	0.179322	-0.846487	0.317999
	736	0.56978	0.148712	-1.2088	0.789706	0.365694	0.0953853	-0.556509	0.31018
	738	-0.191309	0.218742	-0.996411	0.749511	0.965404	0.383468	-0.202481	0.441456
	740	0.248038	0.269915	-0.643719	0.370996	1.00268	0.352941	0.19661	0.598243
	742	0.32843	0.326964	-0.353755	0.439306	0.531703	0.368094	0.278007	0.627462
	744	0.351442	0.298977	-0.760904	0.406528	0.494367	0.41592	0.269366	0.52269
	746	0.297043	0.198395	-0.150951	0.494316	0.598877	0.377502	0.647322	0.203038
	748	0.399075	0.304404	-0.144965	0.445402	0.0856959	0.356364	0.513928	0.338886
	750	0.128404	0.330797	-0.228804	0.483443	-0.0733113	0.42804	0.789131	0.275173
	752	-0.577261	0.390787	-0.209104	0.408541	-0.0143908	0.393871	0.49614	0.25692
	754	-0.67534	0.423058	-0.501607	0.700294	-0.133865	0.225656	0.446407	0.282507
	756	-0.372793	0.435043	0.158449	0.474497	-0.289101	0.121757	0.190395	0.287522
	758	-0.0691924	0.280332	0.0524194	0.46236	-0.0504622	0.155368	0.575136	0.345333
	760	0.283099	0.300874	-0.42549	0.501213	0.1051	0.16691	0.281942	0.309117
	762	0.510247	0.410906	0.0212131	0.530557	0.102275	0.206794	0.31775	0.441183
	764	0.899472	0.257719	-0.488102	0.587136	0.128006	0.248818	-0.0309119	0.457464
	766	0.674002	0.223548	-0.474523	0.686688	0.254101	0.335678	0.16439	0.455722
	768	0.500533	0.315095	-0.362897	0.601356	0.0817372	0.359605	0.147256	0.277499
	770	-0.074991	0.43257	-0.0340712	0.536691	0.110737	0.195902	0.194245	0.277383
	772	-0.268678	0.432655	0.0274752	0.411305	-0.20728	0.214687	0.332844	0.25248
	774	-0.386961	0.408014	-0.311724	0.283149	0.170998	0.292493	0.465422	0.303945
	776	-0.48361	0.329857	-0.318647	0.401223	-0.0705313	0.156508	-0.101192	0.332105
	778	-0.204184	0.188336	-0.305567	0.379161	-0.443115	0.184464	0.112545	0.383806
	780	-0.267026	0.273273	-0.396749	0.625917	-0.132522	0.364016	0.00437149	0.361357
	782	0.0645771	0.281449	-0.225291	0.617898	0.000822904	0.43035	0.158235	0.379702
	784	-0.120481	0.258244	0.685657	0.297956	0.370866	0.507774	-0.0186912	0.353833
	786	-0.288943	0.273685	0.363077	0.293808	0.393128	0.393117	0.603211	0.233511
	788	-0.518781	0.345566	0.647416	0.218595	0.706747	0.31633	0.237561	0.282775
	790	-0.442199	0.285388	0.414746	0.427051	0.588767	0.215416	0.473316	0.235761
	792	-0.704155	0.210369	-0.0178662	0.607155	0.735234	0.227075	0.285524	0.253283
	794	-0.181892	0.328982	0.214518	0.473353	0.769464	0.169098	0.463953	0.311821
	796	-0.0930235	0.361196	1.0299	0.504758	0.763403	0.301872	0.045144	0.366122
	798	-0.170978	0.319911	1.41309	0.520129	0.765506	0.339375	0.352795	0.353998
	800	-0.126636	0.406012	0.880429	0.797824	0.471101	0.230986	0.427846	0.339183
	802	0.111489	0.435022	1.37652	0.607346	0.470508	0.327031	0.136906	0.325725
	804	-0.233698	0.352235	0.990658	0.559154	0.668546	0.20487	0.113543	0.373468
	806	-0.196823	0.314912	0.288044	0.487707	0.855257	0.166277	0.0304119	0.298258
	808	0.14755	0.277394	-0.0695424	0.330132	0.973203	0.344788	0.0516391	0.380041
	810	0.201284	0.151072	-0.549138	0.537029	0.450791	0.481874	0.242731	0.335192
	812	0.278554	0.23697	-0.644153	0.599793	0.480784	0.467697	0.762675	0.388388
	814	0.193116	0.271083	-0.204139	0.295881	0.188381	0.45078	0.937589	0.417986
	816	0.448645	0.168891	-0.474583	0.373884	0.043517	0.419792	1.36051	0.800473
	818	0.343219	0.254019	-0.970204	0.418419	0.629868	0.253228	1.14536	0.946866
	820	0.324185	0.375698	-0.5826	0.126725	0.933188	0.354494	1.37328	0.942022
	822	0.189016	0.340532	-0.479151	0.290953	0.802152	0.421269	0.683638	0.719622
	824	0.313401	0.293112	-0.265414	0.389058	0.880432	0.212412	0.73526	0.748035
	826	0.0490322	0.253515	-0.395931	0.219738	0.635909	0.300024	-0.524617	0.327118
	828	-0.156361	0.247184	-0.364285	0.137014	0.0787947	0.26314	-0.169554	0.624881
	830	0.12016	0.245916	0.0641254	0.530086	-0.0569311	0.309445	-0.0512136	0.575795
	832	0.161335	0.298002	0.319011	0.511658	-0.0959868	0.401955	0.0955316	0.539669
	834	0.0486341	0.232523	-0.237014	0.332605	0.0932043	0.357965	0.059802	0.496656
	836	0.0558674	0.380428	-0.456395	0.331974	0.338501	0.267974	0.334979	0.374124
	838	0.117741	0.447034	-0.548194	0.28266	0.296931	0.392157	0.314298	0.37899
	840	0.0164852	0.339277	-0.741915	0.560268	0.512323	0.301468	0.151212	0.303495
	842	0.00668581	0.364342	-0.981578	0.59682	0.318965	0.291347	0.542006	0.339882
	844	0.126872	0.430659	-0.945401	0.601069	-0.144411	0.296446	0.559811	0.41121
	846	0.341051	0.332385	-0.461554	0.263703	-0.520879	0.210162	0.83924	0.498575
	848	-0.100335	0.305564	-0.0756215	0.213103	-0.575772	0.257468	0.807276	0.358627
	850	0.387223	0.31651	0.119047	0.191128	-0.558826	0.30108	0.636984	0.492629
	852	-0.0726202	0.388524	0.102987	0.446174	-0.472462	0.360771	0.717062	0.442771
	854	-0.0175739	0.411349	0.0898539	0.441007	-0.367794	0.389753	0.585599	0.323234
	856	-0.148603	0.455592	0.218999	0.470296	-0.399234	0.354646	0.781239	0.296507
	858	0.167941	0.307641	-0.0615986	0.772043	-0.179352	0.431928	0.589967	0.384067
	860	-0.215816	0.493993	0.325846	0.486228	-0.249277	0.403438	0.558134	0.361175
	862	-0.358536	0.478946	0.319077	0.35421	-0.106824	0.405563	0.0705023	0.353223
	864	-0.143347	0.519625	0.0889748	0.431274	-0.225854	0.363979	0.276633	0.467065
	866	0.509659	0.325865	-0.0853369	0.314268	-0.0136263	0.353822	0.179357	0.362553
	868	0.643423	0.315362	0.610019	0.681777	0.288746	0.39789	0.230274	0.279296
	870	0.474359	0.305348	0.181923	0.770549	0.270767	0.337289	-0.128979	0.275312
	872	-0.186936	0.360819	0.292107	0.876625	-0.163244	0.3578	0.247081	0.293053
	874	-0.262979	0.398757	0.292059	0.849686	0.0424165	0.344996	0.809607	0.373667
	876	-0.375092	0.387261	-0.279198	0.670945	0.144565	0.202242	0.406169	0.4671
	878	-0.542003	0.332372	-1.04315	0.485414	0.229054	0.306735	0.123063	0.378787
	880	-0.417799	0.397637	-0.817514	0.477152	-0.332636	0.589107	0.230661	0.363429
	882	-0.306039	0.296439	-1.35939	0.55043	0.546525	0.314128	0.380679	0.207928
	884	0.0156749	0.580266	-1.35715	0.546059	0.095973	0.56991	0.416462	0.218529
	886	-0.133477	0.60388	-1.17857	0.581921	-0.0982342	0.576693	0.552969	0.322376
	888	-0.218144	0.320467	-0.23894	0.56687	-0.0377897	0.607925	0.451441	0.370505
	890	0.325111	0.343062	-0.68855	0.390036	0.368213	0.491033	0.526334	0.329569
	892	0.573989	0.302951	0.130367	0.356439	-0.0829141	0.608694	1.07717	0.316812
	894	-0.0374397	0.29136	0.105635	0.347599	0.0163072	0.537041	0.61015	0.43201
	896	-0.00509735	0.427022	0.232978	0.316702	0.0179501	0.535121	0.298295	0.29573
	898	-0.169669	0.38181	0.359664	0.583217	0.12789	0.427693	0.462515	0.261895
	900	-0.154471	0.395877	0.545507	0.578581	0.243228	0.509498	0.601696	0.216102
	902	-0.401206	0.397502	0.435278	0.597183	0.477997	0.393792	0.432098	0.200348
	904	-0.270094	0.382611	-0.12025	0.462087	0.554821	0.335644	0.524773	0.404663
	906	0.0715443	0.346445	-0.480499	0.440608	0.171389	0.322021	0.348352	0.463247
	908	-0.0736545	0.280171	-0.285254	0.35804	0.0823593	0.275236	0.399438	0.223374
	910	-0.107538	0.20369	-0.559371	0.435996	0.371984	0.246208	0.258668	0.182408
	912	-0.523136	0.352761	-0.622826	0.501365	0.261966	0.295562	0.583013	0.277178
	914	-0.413364	0.322419	-0.127629	0.67644	-0.00251087	0.388117	0.575344	0.299302
	916	-0.529104	0.406439	-0.134604	0.688807	0.201596	0.366617	0.775787	0.349596
	918	-0.43789	0.483894	-0.883817	0.463571	0.285097	0.44821	0.31469	0.301856
	920	-0.640141	0.504811	-1.33033	0.437561	0.0690568	0.346899	0.647427	0.372735
	922	-0.302743	0.531415	-0.646562	0.377846	0.235695	0.467365	0.568217	0.440644
	924	-0.190797	0.446924	-0.884359	0.387658	0.0503672	0.430661	0.806671	0.372178
	926	-0.203445	0.143903	0.00299884	0.418582	0.0714732	0.482419	0.900936	0.444449
	928	-0.613176	0.328956	0.322688	0.710783	-0.152166	0.5655	1.11073	0.529459
	930	-0.262322	0.279156	0.0360766	0.714528	0.167109	0.436406	0.518494	0.562849
	932	-0.238492	0.271624	-0.117754	0.487618	0.20878	0.434721	0.543406	0.618718
	934	-0.135488	0.393239	-0.292938	0.809031	0.0931078	0.318561	1.02454	0.565358
	936	0.0516003	0.396557	-1.39474	0.52114	0.0470903	0.285661	1.00886	0.544948
	938	0.491342	0.389716	-0.860183	0.568832	-0.0216009	0.383282	0.665674	0.57971
	940	0.299027	0.485944	0.128291	0.668339	0.17561	0.299148	1.11371	0.670899
	942	-0.281351	0.495958	-0.190443	0.760923	0.255404	0.36393	0.402947	0.537395
	944	0.228131	0.361176	0.044633	0.680071	0.535539	0.288807	0.396928	0.582952
	946	0.0525392	0.269832	-0.103933	0.666849	0.403033	0.255059	0.239821	0.632968
	948	0.299641	0.34582	-0.485083	0.650999	0.276203	0.414218	0.514449	0.703314
	950	0.330703	0.289458	-0.133219	0.409104	0.461605	0.379633	0.285645	0.664727
	952	0.467405	0.257344	-0.214337	0.213755	0.213966	0.455243	0.457836	0.553761
	954	0.48062	0.322969	-0.576641	0.341894	-0.174023	0.333985	0.1702	0.573965
	956	-0.248454	0.499441	-1.18383	0.279061	-1.01584	0.516673	-0.53492	0.519233
	958	-1.01521	0.641828	-2.31323	0.444682	-2.283	0.9569	-1.66441	0.720295
