# Supplementary material for: PKCδ is an activator of neuronal mitochondrial metabolism that mediates the spacing effect on memory consolidation
Source: eLife. 2024 Oct 30;13:RP92085. doi: 10.7554/eLife.92085 (PMC11524582; doi:10.7554/eLife.92085)
Supplement: Figure 5—source data 1. [file elife-92085-fig5-data1.xlsx]

## Sheet: Fig.5a
	Time traces										Post-training PKCδ activity
		No RNAi				DAMB RNAi KK110947					No RNAi		DAMB RNAi KK110947
		Control (unpaired)		5x spaced		Control (unpaired)		5x spaced			Control (unpaired)	5x spaced	Control (unpaired)	5x spaced
	Time (s)	Mean	SEM	Mean	SEM	Mean	SEM	Mean	SEM		1.00191	1.05212	1.0073	0.993211
	0	-6.36529	0.738227	-2.70599	0.747076	-4.3035	0.756741	-6.62284	1.12007		0.971812	1.04529	0.995831	0.988483
	2	-4.50841	0.578813	-1.78429	0.936521	-3.56772	0.676777	-4.34679	0.621187		0.993577	0.988235	1.01795	1.01447
	4	-3.65876	0.612529	-0.583462	0.799983	-3.1014	0.61527	-3.46708	0.670203		1.00224	1.0271	0.996628	1.00638
	6	-3.44721	0.682956	-0.853222	1.02106	-2.97113	0.565884	-3.33883	0.666419		1.00204	1.03573	1.00993	1.01078
	8	-3.59728	0.730515	-0.553857	0.82555	-2.90641	0.818579	-3.50753	0.816837		0.998076	1.04397	0.980101	1.00348
	10	-3.52641	0.59746	-0.647242	0.938158	-3.09464	0.78855	-3.26773	0.707194		1.00824	1.03942	0.990255	0.997416
	12	-3.58695	0.659848	-0.387296	0.963857	-2.81399	0.661954	-3.28682	0.787236		1.01452		1.00201	0.995161
	14	-3.54739	0.646467	0.194672	1.09876	-2.69003	0.61243	-3.28966	0.752876		1.00758			0.956248
	16	-3.20973	0.661731	0.421692	0.822185	-2.67316	0.664109	-3.17422	0.54929
	18	-2.97179	0.50637	-0.279029	0.710647	-2.87057	0.609606	-3.66985	0.574647
	20	-2.87242	0.46428	0.633	0.947234	-2.71474	0.532935	-3.68675	0.687871
	22	-2.68103	0.44912	0.855713	1.12973	-2.59194	0.585267	-3.11643	0.559751
	24	-2.98186	0.424092	0.643548	0.962793	-2.52005	0.640112	-3.28014	0.537427
	26	-2.88341	0.530094	-0.291327	0.503259	-3.03366	0.713241	-3.02419	0.666348
	28	-3.04765	0.617368	0.097918	0.510724	-2.78894	0.623787	-2.94254	0.515025
	30	-3.18548	0.568928	-0.226829	0.612335	-2.78129	0.658931	-3.0191	0.536501
	32	-3.2465	0.578144	-0.520753	0.743454	-2.35289	0.723893	-3.08506	0.513448
	34	-3.02605	0.570597	-0.181778	0.938357	-2.78863	0.667965	-3.30865	0.498433
	36	-3.11114	0.472332	0.15581	0.92997	-2.83136	0.64892	-3.27527	0.510459
	38	-2.90303	0.390169	0.459312	1.033	-2.87448	0.523605	-3.58378	0.558279
	40	-2.99314	0.408285	0.462955	0.903053	-2.54847	0.36888	-3.43362	0.688004
	42	-3.19424	0.412803	0.813945	0.762929	-2.84159	0.386142	-3.69061	0.810618
	44	-3.34061	0.427641	0.192938	0.542129	-2.79123	0.347943	-3.35883	0.730462
	46	-3.51529	0.424618	-0.0153687	0.598129	-2.83606	0.374525	-3.383	0.548805
	48	-3.56896	0.41372	-0.435908	0.469578	-2.79335	0.439438	-3.4816	0.78755
	50	-3.52893	0.339197	-0.377238	0.320453	-3.00205	0.402981	-3.11282	0.576933
	52	-3.53226	0.373225	-0.435583	0.462635	-3.04527	0.529497	-3.25637	0.552929
	54	-3.1104	0.371059	0.0830675	0.484195	-3.3225	0.492357	-3.55541	0.643292
	56	-3.1973	0.320469	-0.104395	0.380154	-3.17925	0.44891	-3.50639	0.747076
	58	-2.5754	0.341865	-0.416133	0.945806	-3.07876	0.470714	-3.1442	0.675128
	60	-3.04735	0.514782	-0.235357	0.96479	-3.12505	0.441976	-3.0224	0.543752
	62	-3.48132	0.558417	0.106714	0.743573	-2.80335	0.377104	-2.95573	0.606028
	64	-3.04359	0.471897	0.141463	0.820023	-2.80649	0.538335	-3.3119	0.571814
	66	-2.87071	0.499824	-0.0525671	1.16812	-2.78874	0.607978	-3.04081	0.556636
	68	-3.06888	0.500362	-0.217586	1.12784	-2.74112	0.591581	-3.13659	0.702658
	70	-3.05824	0.394835	-0.130662	1.19177	-2.82608	0.574152	-2.97941	0.663971
	72	-2.92577	0.412581	0.158302	1.15279	-2.93268	0.480375	-3.06344	0.635847
	74	-3.12427	0.361207	0.580721	0.974631	-2.71619	0.350753	-3.26142	0.850333
	76	-3.49004	0.364266	0.213229	0.886788	-3.02967	0.348995	-3.08462	0.765205
	78	-3.41532	0.361238	0.357709	1.24412	-2.85451	0.348291	-2.7129	0.702837
	80	-3.46452	0.405909	0.017804	0.914408	-2.78882	0.337074	-2.66218	0.590832
	82	-3.39113	0.41976	0.0166224	1.20389	-2.93355	0.374452	-2.71809	0.583232
	84	-3.28863	0.348371	-0.0916743	1.35894	-3.15899	0.397415	-2.91389	0.49148
	86	-3.61255	0.520846	0.861143	1.34005	-3.02211	0.316953	-3.17729	0.505959
	88	-3.39776	0.435894	1.17124	1.15643	-3.44213	0.259445	-3.32084	0.516762
	90	-3.37907	0.368624	1.26687	1.0185	-3.54262	0.246115	-3.15375	0.542894
	92	-3.32435	0.509042	1.00097	0.723381	-3.41079	0.327003	-3.20213	0.46072
	94	-3.24437	0.495735	0.60641	0.727188	-3.03489	0.365212	-3.36385	0.501054
	96	-2.64367	0.403446	0.530368	0.702486	-3.27284	0.414598	-3.30326	0.511271
	98	-2.47272	0.399568	-0.326986	1.01284	-2.72779	0.622064	-3.11978	0.495354
	100	-2.57115	0.503982	-0.313045	1.05946	-2.75834	0.516247	-3.43316	0.512173
	102	-2.47997	0.546742	-0.428065	1.19071	-2.65594	0.61043	-3.91301	0.796383
	104	-2.76731	0.521415	-0.0675409	1.23599	-2.84863	0.542707	-3.72964	0.782494
	106	-2.8442	0.509364	0.0828675	1.13752	-2.98086	0.479203	-3.54774	0.688615
	108	-2.93908	0.563124	0.659922	0.835881	-2.8316	0.44348	-3.4553	0.710649
	110	-3.08476	0.431525	0.713471	0.884331	-2.90192	0.511233	-3.13617	0.764611
	112	-2.64889	0.526634	0.669229	0.760692	-2.73772	0.662317	-3.09751	0.705149
	114	-2.85936	0.507208	0.550823	0.787914	-2.32422	0.537098	-2.85442	0.775454
	116	-2.68689	0.436297	0.556864	0.858887	-2.73859	0.734126	-2.90588	0.86627
	118	-2.62345	0.740085	-0.437374	1.19335	-3.00383	0.691096	-3.64886	0.86623
	120	-2.87889	0.768272	0.0756136	1.00623	-2.70555	0.460234	-3.8672	0.907323
	122	-3.56715	0.74634	-0.573221	1.59658	-3.27584	0.245676	-4.54605	0.76584
	124	-3.91913	0.781991	0.257836	1.09008	-3.51216	0.337134	-4.95906	0.878124
	126	-3.49678	0.622853	0.387209	0.964868	-3.5526	0.333237	-5.04808	1.02312
	128	-3.47895	0.639933	-0.274652	1.29332	-3.7061	0.428028	-4.68394	1.0856
	130	-3.40953	0.547044	-0.237398	1.16016	-4.00609	0.326808	-4.42125	1.10597
	132	-3.48917	0.467265	-0.617791	1.1813	-3.60279	0.453297	-3.81715	1.20129
	134	-3.69274	0.632506	-0.912903	1.21714	-3.71204	0.440359	-3.55166	0.945289
	136	-3.36372	0.737364	-0.423949	1.12374	-3.61547	0.492206	-3.38602	0.948361
	138	-3.35465	0.467692	-0.48968	1.07938	-3.48864	0.663996	-3.50416	0.948235
	140	-3.93905	0.546038	-1.291	1.5464	-3.09593	0.585545	-3.53251	0.902205
	142	-3.23748	0.482333	-1.36673	1.60393	-3.13848	0.640371	-3.89753	0.961476
	144	-3.20565	0.47223	-1.4771	1.87841	-3.46092	0.458736	-4.04315	0.900959
	146	-3.33705	0.548139	-1.78827	1.95041	-3.18294	0.575165	-4.21133	1.05501
	148	-3.21548	0.590148	-1.81612	1.93325	-2.86673	0.521119	-4.14512	1.01504
	150	-3.17612	0.62202	-1.08331	1.82068	-3.48725	0.49482	-4.28132	0.945565
	152	-3.26749	0.633709	-1.4826	1.76909	-3.2092	0.457072	-3.92889	0.949391
	154	-2.92385	0.666329	-0.734534	1.27187	-2.66962	0.493585	-3.95581	0.970943
	156	-2.84455	0.614386	-0.356835	1.18241	-3.10954	0.433745	-3.57367	1.0532
	158	-2.85421	0.637098	0.0614747	1.1127	-2.42952	0.367752	-3.4366	1.32057
	160	-2.76199	0.614799	0.162111	1.13372	-2.14559	0.309033	-3.66922	1.4124
	162	-2.65899	0.479804	-0.39093	1.1032	-2.02118	0.292056	-3.65285	1.76011
	164	-2.92771	0.344471	-0.328517	1.30811	-1.82945	0.140193	-3.65419	1.6766
	166	-2.93089	0.346314	-0.352873	1.05673	-1.63639	0.129573	-3.74501	1.66241
	168	-2.81173	0.351076	-0.48248	1.157	-1.89143	0.135339	-3.20103	0.718773
	170	-2.46859	0.30993	-0.372019	0.721951	-1.79894	0.160714	-2.75142	0.64757
	172	-2.15905	0.363124	-0.815224	1.12126	-1.81895	0.155233	-2.62411	0.684797
	174	-2.19955	0.4247	-0.732728	1.07823	-2.03045	0.403848	-2.82449	0.805635
	176	-2.1543	0.410956	-0.588777	1.02596	-1.67443	0.330914	-2.70482	0.751712
	178	-2.33153	0.41151	-0.0585656	0.901782	-1.62351	0.256553	-2.62735	0.73897
	180	-2.08223	0.356832	-0.359664	0.971563	-1.64079	0.389884	-2.51038	0.744584
	182	-2.19742	0.355477	-0.433641	1.00212	-1.67571	0.408223	-2.8832	0.752099
	184	-1.9345	0.324762	-0.313703	0.945186	-1.54299	0.398326	-2.24542	0.793766
	186	-2.12144	0.26203	-0.295751	1.16272	-1.70783	0.366383	-2.11237	0.814814
	188	-1.84866	0.327794	-0.608156	1.06928	-1.47655	0.399628	-2.0157	0.851812
	190	-1.43656	0.359746	-0.626245	1.02519	-1.57456	0.336076	-1.92801	0.7531
	192	-1.7018	0.319838	0.137373	0.949889	-1.36475	0.408768	-1.75233	0.767725
	194	-1.95117	0.44218	-0.369451	0.954092	-1.20638	0.373665	-1.86565	0.706773
	196	-1.83823	0.456321	0.569902	0.579537	-0.844482	0.426932	-2.02655	0.728826
	198	-1.93343	0.437811	0.855032	0.492764	-0.670273	0.43256	-1.83768	0.708048
	200	-1.63456	0.427922	0.804172	0.668023	-0.418785	0.473477	-2.00027	0.672698
	202	-1.71387	0.437361	1.16107	0.525741	-0.514269	0.483627	-1.68955	0.623896
	204	-1.27813	0.387026	1.1352	0.497107	-0.790289	0.507491	-1.67261	0.635505
	206	-1.32875	0.429631	0.626022	0.796329	-0.898247	0.541341	-1.4422	0.69912
	208	-1.60416	0.406837	-0.00873188	1.01716	-0.712776	0.547218	-1.63978	0.675366
	210	-1.56294	0.458597	0.0190369	1.02296	-0.879345	0.455077	-1.61137	0.71422
	212	-1.45621	0.505887	-0.209588	0.994857	-0.815637	0.471548	-1.33231	0.573021
	214	-1.65668	0.356459	0.0459859	0.828916	-0.804283	0.449452	-1.03002	0.537536
	216	-1.32172	0.416714	0.0530133	0.790283	-0.877201	0.481324	-1.31015	0.342242
	218	-1.18051	0.393853	-0.253249	0.752489	-1.08952	0.39266	-1.96888	0.354377
	220	-1.40873	0.311761	-0.216229	0.788114	-1.24445	0.385158	-2.08789	0.255693
	222	-1.6273	0.383694	-0.600912	1.01411	-1.39796	0.372892	-2.32605	0.238174
	224	-2.05647	0.265326	-0.403621	1.03185	-1.53583	0.32568	-2.21224	0.248549
	226	-2.21931	0.350146	-0.750771	0.942664	-1.20108	0.340174	-2.11586	0.30313
	228	-1.96766	0.359161	-0.473838	0.901394	-1.19018	0.406104	-1.5372	0.306922
	230	-2.03682	0.339348	-0.493287	1.18512	-1.24232	0.503628	-1.33431	0.5773
	232	-1.63337	0.401236	-0.184654	0.92798	-0.922508	0.560494	-1.23143	0.513343
	234	-1.33568	0.296179	0.16822	1.01226	-0.529019	0.556788	-1.12717	0.511367
	236	-1.27701	0.321108	0.312053	0.941821	-0.91647	0.557677	-1.07468	0.473837
	238	-1.17455	0.413103	-0.141527	0.957718	-0.548863	0.390177	-1.43759	0.468988
	240	-0.849287	0.371127	0.429587	0.688729	-0.661491	0.440662	-1.44428	0.467291
	242	-0.721416	0.389492	0.329814	0.616876	-1.34003	0.450967	-1.49381	0.395838
	244	-1.139	0.31314	0.0563233	0.60112	-1.42195	0.425722	-1.29647	0.414659
	246	-1.14183	0.238772	-0.332617	0.861896	-1.13751	0.346059	-1.30371	0.463363
	248	-1.20416	0.297594	0.211327	0.677013	-1.14204	0.187548	-1.59508	0.532765
	250	-1.13956	0.380232	-0.181042	0.719189	-1.04104	0.237436	-1.32682	0.553767
	252	-1.51295	0.480888	0.00628021	0.615893	-0.752846	0.232255	-1.45093	0.515207
	254	-1.18529	0.576763	0.163482	0.665371	-1.16642	0.260077	-1.28895	0.335433
	256	-1.37073	0.507928	0.44454	0.669738	-1.24434	0.330754	-1.19353	0.311504
	258	-1.20737	0.405053	0.00615769	0.783392	-1.31353	0.318596	-1.10083	0.316136
	260	-1.26993	0.486977	0.466485	0.882013	-0.973182	0.323722	-1.47244	0.404998
	262	-0.856418	0.428679	0.260304	0.938016	-0.859424	0.371102	-1.17609	0.501641
	264	-0.971516	0.446979	0.368454	0.88376	-0.527552	0.481176	-1.18573	0.551173
	266	-1.43749	0.460371	0.0241003	0.780565	-0.0821313	0.375845	-1.27877	0.547584
	268	-1.16058	0.407102	0.380507	0.741736	-0.121508	0.396513	-0.885562	0.558083
	270	-1.47693	0.523069	0.223567	0.697034	-0.392879	0.500439	-1.0061	0.467696
	272	-1.54528	0.520618	-0.357493	0.645516	-0.704096	0.395344	-1.0897	0.336416
	274	-1.64437	0.559302	-0.202728	1.18614	-0.596859	0.390169	-0.97885	0.41796
	276	-1.07519	0.666962	-0.176035	1.27978	-0.42461	0.348628	-0.891183	0.607109
	278	-1.07738	0.46573	-0.223374	1.25269	-0.359855	0.294491	-1.29887	0.413738
	280	-1.17419	0.478926	-0.463635	1.49201	-0.334995	0.342597	-1.35568	0.552776
	282	-0.842279	0.420067	-0.104677	1.20512	-0.218764	0.221964	-0.732849	0.45652
	284	-0.756439	0.368209	0.258562	0.879717	-0.535799	0.368762	-0.592127	0.636645
	286	-1.0646	0.450038	0.77974	0.5353	-0.138664	0.286117	-0.630156	0.43882
	288	-0.774577	0.394076	0.721964	0.527441	-0.475334	0.283275	-0.702824	0.585752
	290	-0.715511	0.245095	-0.149936	0.457708	-0.440722	0.282705	-0.219657	0.606153
	292	-0.752096	0.170261	0.258666	1.02578	0.0920709	0.456435	-0.373795	0.669486
	294	-0.684255	0.24521	0.916007	0.698988	0.0345337	0.546988	-0.549128	0.543121
	296	-0.699543	0.201864	0.381496	0.767663	-0.323555	0.322572	-0.218489	0.460623
	298	-0.550082	0.251091	0.491638	0.821514	0.00823662	0.302655	-0.438114	0.490526
	300	-0.692006	0.304215	0.666044	0.825867	0.0554501	0.281971	-0.848201	0.251171
	302	-0.621449	0.285972	0.673804	0.987969	-0.107212	0.312102	-1.02378	0.204402
	304	-0.5713	0.276443	-0.243823	1.54392	-0.0695314	0.178993	-1.03774	0.313971
	306	-0.495054	0.368023	-0.342976	1.60079	-0.257634	0.363256	-1.22867	0.323815
	308	-0.953377	0.448944	0.183083	0.955148	-0.382909	0.454423	-0.966652	0.38396
	310	-0.659823	0.307054	0.232125	0.908149	-0.660566	0.485785	-1.43018	0.305008
	312	-0.451509	0.350776	-0.553216	1.20182	-0.415038	0.394515	-1.2962	0.409322
	314	-0.390987	0.407014	-0.142159	0.786731	-0.415675	0.364925	-1.27335	0.342095
	316	-0.607921	0.352617	0.0997377	0.770686	-0.76514	0.450058	-0.993488	0.244054
	318	-0.507572	0.373958	-0.346588	0.795812	-0.949837	0.406154	-1.2383	0.320605
	320	-0.842792	0.343187	-0.0873739	0.556738	-0.816254	0.457552	-1.06375	0.364581
	322	-0.704619	0.28599	0.0677776	0.506519	-0.379671	0.393117	-0.974424	0.470969
	324	-0.269533	0.511304	-0.334825	0.78155	-0.796055	0.488357	-1.27004	0.460135
	326	-0.301051	0.433697	0.272634	0.867176	-0.298223	0.493723	-1.13917	0.511644
	328	0.089951	0.398923	0.605735	0.899212	0.107485	0.566354	-0.973096	0.490507
	330	-0.577232	0.344764	-0.492885	0.815672	-0.0891215	0.438285	-0.723454	0.423155
	332	-0.560549	0.476138	-0.684595	1.06804	-0.140172	0.412569	-0.850228	0.342118
	334	-1.2381	0.298933	0.276128	0.968733	-0.311111	0.413833	-0.708474	0.351118
	336	-1.05104	0.378303	0.359328	1.14864	-0.551387	0.438843	-0.937049	0.258015
	338	-1.03051	0.331615	0.254735	0.960321	-0.375009	0.29951	-1.16358	0.343376
	340	-0.939806	0.389236	0.960276	0.743417	-0.343987	0.302305	-1.26426	0.319322
	342	-0.830543	0.348919	0.738122	0.560974	-0.344929	0.366092	-1.13426	0.304556
	344	-0.8717	0.447054	0.497237	0.500493	-5.42431e-05	0.214138	-1.04256	0.398715
	346	-0.907233	0.370558	0.272204	0.606045	-0.256115	0.170772	-0.846476	0.398576
	348	-0.819733	0.479416	0.480719	0.652979	-0.368946	0.270977	-0.859035	0.5483
	350	-0.986607	0.457807	0.525675	0.635491	-0.647343	0.439562	-0.826275	0.408292
	352	-0.767258	0.376138	0.390956	0.704012	-1.08672	0.229984	-0.830571	0.352198
	354	-0.75105	0.409812	0.0701692	0.631638	-0.293555	0.566627	-0.820331	0.452351
	356	-0.445943	0.355013	0.057355	0.592721	-0.451134	0.468055	-1.44903	0.254281
	358	-0.551298	0.269341	0.153556	0.464493	-0.696431	0.391103	-1.42579	0.359875
	360	-0.312737	0.287991	-0.044836	0.538289	-0.660648	0.414541	-1.22024	0.230954
	362	-0.470387	0.195782	-0.0150514	0.54421	-0.512462	0.445538	-0.663814	0.403865
	364	-0.442205	0.132097	-0.223756	0.843475	-0.685739	0.451223	-0.667249	0.51973
	366	-0.380655	0.184899	-0.0591945	0.907929	-0.385994	0.367527	-0.310536	0.551275
	368	-0.385154	0.150348	0.301872	0.67068	-0.333527	0.323478	-0.468678	0.538273
	370	-0.280465	0.234802	0.538071	0.709828	-0.351752	0.243654	-0.696637	0.39663
	372	-0.418383	0.354569	0.465776	0.735885	-0.552206	0.298545	-0.917456	0.3894
	374	-0.482945	0.39224	0.348196	0.665458	-0.431237	0.431003	-1.0656	0.38623
	376	-0.540518	0.422811	0.37191	0.76837	-0.105104	0.393494	-1.37046	0.33732
	378	-0.379463	0.501327	0.167477	0.561979	-0.54718	0.274077	-1.53136	0.373543
	380	-0.771846	0.396526	-0.354043	0.76154	-0.270264	0.304454	-1.29652	0.617488
	382	-0.519273	0.39677	-0.24795	0.486072	-0.210973	0.364508	-1.49323	0.498827
	384	-0.474635	0.521712	-0.472565	0.742116	-0.553807	0.414263	-1.2788	0.404934
	386	-0.697111	0.508736	-0.148052	0.480576	-0.549872	0.484276	-0.922283	0.599815
	388	-0.691057	0.434454	0.301829	0.491005	-0.18928	0.329927	-0.862583	0.683072
	390	-0.660497	0.478732	0.502934	0.373904	-0.219148	0.329864	-0.736743	0.541978
	392	-0.765269	0.452577	0.295589	0.511749	-0.247214	0.383512	-0.831372	0.470409
	394	-0.980569	0.456052	0.991664	0.227833	-0.0748587	0.32526	-0.735211	0.482505
	396	-0.694353	0.353098	1.37284	0.243255	0.198133	0.226898	-0.702346	0.45029
	398	-0.604138	0.442108	1.11945	0.350853	0.197417	0.318365	-0.42429	0.320534
	400	-0.675363	0.379996	1.07812	0.292959	0.0545601	0.325997	-0.327149	0.183781
	402	-0.710754	0.304024	0.95693	0.409764	0.0734096	0.225242	-0.285514	0.291704
	404	-0.922852	0.245603	0.695044	0.565233	-0.0748988	0.249888	-0.363933	0.353756
	406	-0.952279	0.336839	0.486087	0.576837	-0.473841	0.224323	-0.283437	0.360792
	408	-1.01821	0.224228	0.323175	0.578165	-0.27474	0.233814	-0.341674	0.393428
	410	-0.820825	0.302526	0.535311	0.551461	-0.206472	0.232748	-0.257168	0.252122
	412	-0.70046	0.32552	0.700679	0.588021	-0.498238	0.287801	-0.649491	0.345867
	414	-0.865542	0.389708	0.587359	0.457927	-0.742843	0.346817	-0.310558	0.20678
	416	-0.493929	0.368848	0.591131	0.543181	-0.844782	0.352233	-0.393273	0.244629
	418	-0.347238	0.370878	0.390173	0.224569	-1.22169	0.322394	-0.409805	0.244655
	420	-0.422597	0.391836	0.721105	0.359936	-0.841673	0.303144	-0.710981	0.380434
	422	-0.678885	0.369612	0.871381	0.402556	-0.746872	0.365682	-0.55082	0.299547
	424	-0.729994	0.358697	0.121561	0.339128	-0.716721	0.325155	-0.467125	0.264776
	426	-0.783634	0.325647	-0.277781	0.414328	-0.720768	0.369634	-0.490419	0.327738
	428	-0.67753	0.227273	-0.398276	0.459823	-0.552262	0.314209	-0.46999	0.184874
	430	-0.565973	0.366379	-0.481582	0.365962	-0.500846	0.340858	-0.288054	0.217476
	432	-0.576016	0.354916	-0.805078	0.528601	-0.357053	0.21615	-0.689147	0.255094
	434	-0.37343	0.46422	-0.691402	0.475568	-0.426354	0.318895	-0.783444	0.297106
	436	-0.951992	0.341622	-0.298015	0.175059	-0.355994	0.317038	-1.12744	0.305767
	438	-0.795967	0.290724	0.176174	0.363478	-0.447156	0.334454	-1.38759	0.265387
	440	-0.623036	0.264154	0.472846	0.556917	-0.289809	0.232457	-1.21545	0.240025
	442	-0.453345	0.247503	0.062619	0.63463	-0.103142	0.228777	-1.13932	0.2561
	444	-0.362058	0.248841	0.200809	0.843142	0.139727	0.293377	-1.52282	0.506356
	446	-0.56951	0.292691	0.649536	0.726566	0.259915	0.361846	-1.04821	0.442571
	448	-0.56137	0.337519	0.596467	0.565133	0.197163	0.381701	-1.03607	0.445669
	450	-0.494309	0.319628	0.84624	0.466091	0.0938893	0.434648	-0.665139	0.376256
	452	-0.728579	0.328693	0.641837	0.578639	0.0515802	0.299757	-0.524557	0.354999
	454	-0.574181	0.382557	0.383338	0.127529	0.0436447	0.42201	-0.653219	0.331279
	456	-0.536887	0.370117	-0.358348	0.351042	-0.407546	0.458209	-0.456722	0.322505
	458	-0.679492	0.38016	-0.595063	0.320967	-0.759617	0.37285	-0.268495	0.389132
	460	-0.807398	0.530675	-0.303806	0.335757	-0.483095	0.20306	-0.8288	0.352387
	462	-0.63288	0.403732	-0.334995	0.197253	-0.872964	0.264945	-0.574252	0.311624
	464	-0.302625	0.178038	-0.705423	0.394904	-0.494851	0.249646	-0.151039	0.325402
	466	-0.25637	0.33139	0.232618	0.2653	-0.642873	0.186812	-0.464338	0.342602
	468	-0.340787	0.358236	0.0551728	0.305014	-0.635132	0.202007	-0.41717	0.278209
	470	-0.627676	0.283324	-0.328857	0.696837	-0.576766	0.263794	-0.254288	0.411265
	472	-0.610813	0.333566	-0.320106	0.457558	-0.16414	0.329126	-0.688875	0.485108
	474	-0.437906	0.320207	0.16627	0.619265	-0.0652015	0.274006	-1.30298	0.451463
	476	-0.769512	0.366254	0.126865	0.572777	0.123513	0.355941	-0.934785	0.375548
	478	-0.76699	0.40808	0.827882	0.469684	0.251805	0.312427	-0.575516	0.269164
	480	-1.08346	0.35918	0.825314	0.446326	0.180528	0.30503	-0.81105	0.341317
	482	-0.822058	0.356148	0.476017	0.376046	0.0233157	0.305123	-0.677817	0.310165
	484	-0.948478	0.3619	0.587982	0.385871	0.200752	0.20343	-0.504536	0.179266
	486	-0.665825	0.278046	1.06857	0.629469	-0.183262	0.199362	-0.564573	0.228438
	488	-0.576485	0.297473	0.451638	0.742738	-0.310922	0.173583	-0.277706	0.175022
	490	-0.623027	0.31437	0.529997	0.717311	-0.141745	0.347754	-0.334944	0.242486
	492	-0.250758	0.423492	0.679116	0.275621	-0.208566	0.34193	-0.419826	0.37248
	494	-0.328524	0.332656	0.548061	0.220232	-0.265954	0.350201	-0.78633	0.313375
	496	-0.199889	0.333459	-0.320405	0.45022	-0.0813415	0.324846	-0.586694	0.278028
	498	-0.487388	0.323738	-0.692771	0.565649	0.0493435	0.364608	-0.695092	0.328812
	500	-0.0435178	0.382737	-0.566721	0.683881	0.144347	0.472429	-0.549852	0.267183
	502	-0.276876	0.308311	-0.597072	0.654741	-0.00684275	0.490361	-0.309922	0.288429
	504	0.266506	0.225651	-0.673838	0.591792	-0.0523485	0.310972	-0.207669	0.176593
	506	0.214989	0.292853	0.508157	0.612204	0.0262081	0.218453	-0.402928	0.252966
	508	0.344983	0.234813	0.405857	0.611713	-0.376142	0.233602	-0.205301	0.391543
	510	0.29823	0.252698	-0.742434	0.580552	-0.0128622	0.245609	-0.636508	0.313951
	512	0.131521	0.263919	-0.136002	0.618106	-0.0574989	0.300725	-0.738685	0.2272
	514	-0.300676	0.24548	-0.0852365	0.641628	-0.284356	0.310946	-0.494679	0.215649
	516	-0.445107	0.371821	-0.347642	0.649482	-0.156317	0.256958	-0.48263	0.210516
	518	-0.391653	0.322621	-0.07546	0.370162	-0.21166	0.40433	-0.392686	0.21642
	520	-0.42402	0.318038	-0.195334	0.553703	-0.400017	0.469881	-0.7766	0.285573
	522	-0.36035	0.320619	-0.226634	0.319354	-0.311822	0.393942	-0.0537563	0.42462
	524	-0.139927	0.328522	-0.708408	0.276824	0.169064	0.37377	-0.194377	0.337639
	526	0.338272	0.398972	-0.499636	0.442832	0.297746	0.306258	-0.398068	0.382956
	528	-0.360077	0.34144	-0.743871	0.456784	0.22336	0.27895	-0.536916	0.364531
	530	-0.509217	0.224511	0.135863	0.597097	0.267078	0.312104	-0.229354	0.284669
	532	-0.312367	0.234927	-0.25341	0.959503	0.00238122	0.401523	-0.324283	0.400169
	534	-0.263773	0.265002	-0.00918604	0.816274	0.0378578	0.377177	-0.277651	0.289499
	536	-0.815294	0.497453	-0.293848	0.811968	-0.215008	0.220937	-0.188819	0.273697
	538	-0.435813	0.31601	0.280863	0.52968	0.0883142	0.306397	-0.468138	0.415603
	540	-0.696598	0.359215	0.357335	0.727895	-0.0683424	0.321224	-0.676251	0.534745
	542	-0.46069	0.407667	0.940843	0.712497	0.119181	0.32658	-0.508301	0.615206
	544	-0.17853	0.330996	0.346203	0.626177	-0.143209	0.409279	-0.243675	0.65077
	546	-0.0818593	0.283993	0.380026	0.801288	-0.0439898	0.407531	-0.273224	0.615489
	548	-0.157371	0.331528	0.240589	0.538493	0.111177	0.357308	0.0622887	0.450951
	550	-0.0272125	0.428765	0.704103	0.373675	0.0930438	0.193404	-0.154959	0.227635
	552	-0.0544034	0.431107	0.296882	0.591375	0.155771	0.254664	0.0691202	0.254309
	554	0.0978575	0.42226	0.400784	0.519706	0.172906	0.268556	-0.153678	0.207226
	556	-0.0964367	0.40783	0.481716	0.596187	0.323441	0.28268	0.0874167	0.172957
	558	-0.0480128	0.317346	0.0157166	0.436918	0.00262943	0.231194	0.037783	0.194906
	560	-0.00310663	0.27274	0.067525	0.541501	-0.177734	0.224665	0.132917	0.203358
	562	-0.0865388	0.302373	-0.626439	0.532968	-0.307153	0.263829	-0.142026	0.286755
	564	-0.373966	0.266905	-0.58336	0.532099	-0.322526	0.333196	-0.178996	0.265867
	566	-0.247124	0.245965	-0.438458	0.391911	-0.479634	0.322442	-0.290516	0.276337
	568	-0.290394	0.243568	-0.289099	0.466272	-0.42111	0.334888	-0.581721	0.257648
	570	-0.244114	0.176268	-0.603003	0.558044	-0.043765	0.24576	-0.624561	0.213515
	572	-0.39386	0.178201	-0.0725554	0.397418	0.140705	0.149733	-0.460364	0.159271
	574	-0.402207	0.173234	-0.467866	0.753222	-0.0240855	0.242426	-0.265112	0.194125
	576	-0.0846231	0.189082	0.183429	0.395073	-0.175108	0.214964	0.112071	0.36758
	578	-0.320627	0.232247	0.222086	0.595787	-0.490299	0.350459	0.318521	0.313204
	580	-0.304326	0.290501	0.0867299	0.748584	-0.577192	0.29621	0.371218	0.316256
	582	-0.124325	0.290622	-0.322534	0.49618	-0.478243	0.288582	-0.0244718	0.30844
	584	-0.0412949	0.333984	0.315319	0.429324	-0.583241	0.336206	0.23372	0.254314
	586	0.570924	0.165254	-0.17266	0.453529	0.0529457	0.32707	-0.207987	0.245163
	588	0.265728	0.223812	0.215679	0.604495	0.000460244	0.27248	-0.1682	0.271742
	590	0.443448	0.240974	0.616892	0.669496	-0.112432	0.430852	-0.23083	0.205632
	592	0.349263	0.300713	-0.0402025	0.573621	-0.0506607	0.466085	-0.00537022	0.190957
	594	0.0802808	0.267826	0.22451	0.432359	-0.151125	0.38318	0.0865088	0.321461
	596	-0.306274	0.161104	0.429897	0.497124	-0.185661	0.463366	0.0718841	0.389242
	598	-0.327995	0.111196	-0.0034803	0.55539	0.123779	0.433782	-0.0737531	0.447013
	600	-0.38219	0.188718	-0.523368	0.600724	0.202988	0.335706	0.00170611	0.456683
	602	-0.433223	0.173187	-0.483834	0.464302	0.0275634	0.333108	-0.412874	0.372116
	604	-0.111655	0.228533	-0.446792	0.434268	-0.143798	0.363216	-0.14977	0.373025
	606	0.313672	0.276666	-0.273132	0.382394	-0.0939051	0.293705	-0.247542	0.342514
	608	0.504112	0.227655	-0.202398	0.461793	-0.203293	0.21889	-0.172856	0.414032
	610	-0.0950028	0.265517	-0.00527741	0.378451	-0.140863	0.251979	-0.254155	0.455594
	612	0.18769	0.227722	-0.122423	0.406523	0.11373	0.226284	-0.601531	0.441969
	614	-0.0488674	0.144201	-0.4404	0.277638	0.0667483	0.285508	-0.586729	0.372968
	616	-0.0898583	0.161438	-0.444943	0.247498	-0.188063	0.162498	-0.345312	0.190886
	618	0.0851274	0.266652	-0.615725	0.273396	-0.0964291	0.18016	-0.548056	0.40496
	620	-0.103723	0.319272	-0.62694	0.370618	0.0552093	0.191628	-0.451706	0.389946
	622	-0.132367	0.246609	-0.753774	0.554049	-0.199875	0.215991	-0.0471268	0.33351
	624	-0.439712	0.298062	-0.136396	0.312927	0.00553195	0.21857	-0.0825271	0.425781
	626	-0.119865	0.319728	-0.186161	0.634549	0.274885	0.247985	0.0164785	0.425204
	628	-0.239259	0.247686	-0.575432	0.354893	0.611565	0.369654	-0.265195	0.323656
	630	-0.280241	0.288858	-0.0126013	0.537886	0.613909	0.327796	-0.404455	0.414917
	632	-0.0936666	0.177873	0.14093	0.437252	0.780152	0.103264	-0.502757	0.379966
	634	0.259185	0.295771	-0.0664751	0.520621	0.426066	0.240435	-0.373136	0.288396
	636	0.247942	0.286593	-0.212814	0.457545	0.629299	0.150945	-0.565651	0.278725
	638	0.188265	0.279062	-0.28175	0.367514	-0.00940924	0.17284	-0.231284	0.301216
	640	-0.0381213	0.245841	-0.0298162	0.333127	0.118307	0.276855	-0.246065	0.271394
	642	0.0961689	0.282972	-0.103583	0.435147	-0.210773	0.227073	-0.528875	0.223092
	644	-0.117466	0.25235	-0.242651	0.408809	-0.153656	0.309042	-0.00957942	0.312499
	646	-0.213214	0.18293	-0.456705	0.560469	-0.0918582	0.363353	0.0695825	0.259601
	648	0.117748	0.315264	-0.154768	0.626733	0.300785	0.281712	-0.0949644	0.310018
	650	0.29553	0.275521	-0.125542	0.562535	-0.0586244	0.394784	-0.174852	0.38014
	652	0.317673	0.213302	-0.101408	0.690563	-0.0862133	0.532564	0.000836011	0.393712
	654	0.242024	0.235484	-0.0739987	0.415815	-0.0906594	0.408749	-0.373445	0.460881
	656	0.210939	0.237377	0.424206	0.262222	0.00366254	0.349204	-0.266577	0.433831
	658	0.178331	0.240992	1.13794	0.803998	0.0834315	0.349102	0.033164	0.277902
	660	-0.113834	0.174364	0.735125	0.532936	-0.185133	0.268842	0.0515645	0.287479
	662	0.170885	0.192987	0.287199	0.516911	0.0282775	0.313779	0.390906	0.177459
	664	0.161189	0.220503	0.684761	0.885492	0.0431159	0.322212	0.385179	0.122916
	666	0.157662	0.185957	-0.222201	0.675279	-0.250581	0.264854	0.137105	0.161411
	668	0.171753	0.193225	-0.740986	0.634117	-0.603763	0.35884	0.0736076	0.320822
	670	0.34576	0.254685	-0.633121	0.650075	-0.548951	0.296639	-0.035454	0.297971
	672	0.269069	0.301721	-0.829717	0.714864	-0.170214	0.302174	-0.0537752	0.385757
	674	0.4218	0.236682	-0.622466	0.690649	-0.0403075	0.389037	-0.196846	0.266971
	676	0.509769	0.253742	0.0417519	0.504746	-0.101063	0.364154	-0.373574	0.269991
	678	0.64115	0.251874	-0.71704	0.393207	0.0646438	0.317837	-0.258196	0.257945
	680	0.675547	0.333266	-0.316279	0.337826	-0.096875	0.363965	-0.168786	0.260769
	682	0.151841	0.310363	-0.336373	0.32802	-0.450894	0.272389	-0.0577449	0.238692
	684	0.228906	0.29397	-0.387955	0.256155	-0.111885	0.215648	0.247911	0.332522
	686	0.0179507	0.279558	-0.518701	0.25287	0.166081	0.279426	0.100236	0.288051
	688	0.1134	0.363665	-0.453803	0.472157	0.112394	0.290296	0.0865144	0.261179
	690	0.0223221	0.342281	-0.733766	0.333126	0.185709	0.331538	0.00126722	0.367202
	692	0.0337852	0.291666	-0.518276	0.397241	-0.148014	0.372367	-0.084702	0.380214
	694	0.167692	0.311502	-0.767785	0.45278	0.218344	0.223712	-0.07718	0.241087
	696	-0.038712	0.212771	-0.164992	0.417634	0.0903997	0.266395	0.209229	0.197327
	698	0.00360213	0.270823	0.267103	0.38955	0.0187593	0.210059	0.0646444	0.223683
	700	0.0702405	0.299708	0.223016	0.450119	0.292728	0.192717	0.158965	0.230618
	702	-0.211794	0.191594	0.323587	0.488761	0.334503	0.156669	0.439394	0.167926
	704	-0.180021	0.188624	0.917577	0.740686	0.372573	0.174785	0.550633	0.179233
	706	-0.373251	0.189658	0.716589	0.634312	0.564084	0.251274	0.82407	0.350997
	708	-0.496214	0.300247	0.398455	0.538978	0.558457	0.314882	0.558869	0.389491
	710	-0.393481	0.240941	0.3124	0.514326	0.52509	0.420492	0.489731	0.425254
	712	0.123446	0.297276	0.217168	0.645135	0.1839	0.391166	0.396426	0.423333
	714	0.0793486	0.276762	0.163034	0.716695	0.222341	0.415412	0.200722	0.417261
	716	0.327822	0.36876	-0.706102	0.676653	-0.0207973	0.377767	-0.0222614	0.330639
	718	0.420073	0.283945	-0.100624	0.423429	-0.116547	0.34929	-0.0273658	0.319785
	720	0.153895	0.268334	-0.399234	0.587274	-0.133384	0.368362	-0.271532	0.238625
	722	0.420331	0.298049	-0.239945	0.495651	-0.245456	0.394275	-0.271451	0.107864
	724	0.158922	0.172253	-0.487479	0.393917	-0.367531	0.323788	0.102102	0.203874
	726	0.463472	0.304626	-0.12472	0.376897	-0.165774	0.383582	0.250545	0.290686
	728	0.638153	0.421411	-0.14038	0.436472	-0.363142	0.378906	0.495372	0.377933
	730	0.481894	0.433255	0.252144	0.492497	-0.271926	0.316482	0.578315	0.429246
	732	0.128694	0.417728	-0.782778	0.67573	0.233604	0.30016	0.617933	0.426228
	734	0.41579	0.473548	-0.029714	0.537368	0.23023	0.273014	0.386357	0.478759
	736	0.162614	0.276018	-0.550704	0.768304	0.106384	0.214671	0.331867	0.426
	738	0.0771307	0.329077	-0.517666	0.734501	0.659443	0.353426	0.553749	0.407627
	740	0.235335	0.274752	0.234708	0.783352	0.510746	0.352102	0.578216	0.384616
	742	0.350806	0.204646	0.705214	0.686483	0.289352	0.331431	0.820471	0.297188
	744	0.338118	0.319354	0.136409	0.520223	0.27811	0.192378	1.07264	0.333294
	746	-0.0269257	0.255793	0.585814	0.478475	0.384864	0.252894	1.43434	0.26755
	748	0.215649	0.242845	0.547795	0.348497	0.471296	0.210399	0.802361	0.351792
	750	0.0260291	0.303919	0.263576	0.391419	0.0235234	0.2438	0.646371	0.37807
	752	-0.284311	0.284483	0.56445	0.364014	0.120614	0.304615	0.706107	0.353315
	754	-0.0757755	0.373781	0.741686	0.50694	0.175248	0.282864	0.941817	0.490954
	756	-0.0569516	0.375557	1.17082	0.398074	0.315296	0.235951	0.737054	0.529058
	758	-0.231255	0.371981	0.731561	0.557231	0.159406	0.287457	0.753226	0.518674
	760	0.314752	0.293505	0.370878	0.451039	-0.173027	0.349768	0.698737	0.51808
	762	0.319841	0.396199	-0.155563	0.430038	-0.214393	0.250789	0.405265	0.482376
	764	0.4152	0.226382	0.117121	0.382022	-0.442819	0.292957	0.468721	0.508219
	766	0.540734	0.227528	-0.746302	0.537757	-0.428292	0.32575	0.081116	0.18295
	768	0.676343	0.261022	-0.11905	0.479286	-0.0735867	0.362282	0.141971	0.296469
	770	0.970357	0.254973	0.164642	0.411325	-0.000480504	0.390752	-0.188915	0.238156
	772	1.12109	0.325399	0.34775	0.451225	0.171353	0.273119	-0.301669	0.21587
	774	0.792007	0.405248	0.135975	0.384368	0.529862	0.221801	0.029613	0.326351
	776	0.690078	0.393744	-0.0114625	0.264216	0.478624	0.321735	0.274715	0.423165
	778	0.604766	0.419173	0.116664	0.348649	0.725714	0.393034	0.248597	0.415093
	780	0.338846	0.437658	0.102066	0.431739	0.791266	0.295476	0.235977	0.414774
	782	0.23041	0.261076	0.20786	0.493332	0.761215	0.302615	0.140999	0.487668
	784	0.129668	0.226517	0.251196	0.439221	0.597767	0.290823	0.636532	0.419427
	786	-0.168992	0.189605	0.227164	0.537691	0.783648	0.295438	0.397811	0.410379
	788	0.00688751	0.190707	0.0533188	0.546164	0.560064	0.296632	0.401656	0.410175
	790	-0.116614	0.115303	0.0208744	0.34039	0.515868	0.264408	0.614406	0.407145
	792	-0.104412	0.277626	-0.314903	0.283395	0.184936	0.257338	0.644929	0.300767
	794	-0.032298	0.204295	-0.263813	0.48709	0.487071	0.309774	0.599189	0.34483
	796	-0.138028	0.349009	0.643236	0.900096	0.195693	0.337332	0.620272	0.36069
	798	-0.172932	0.290091	0.677993	0.965356	0.426778	0.340281	0.684187	0.38516
	800	-0.204006	0.286322	0.688327	0.965839	0.188585	0.353873	0.473692	0.351258
	802	0.210045	0.339905	0.678925	0.722367	0.089162	0.333053	0.474983	0.392607
	804	0.393477	0.29797	0.61924	0.548015	-0.50584	0.16054	0.477531	0.382022
	806	0.826105	0.322935	0.939773	0.74047	-0.277521	0.247787	0.0790616	0.270737
	808	0.995148	0.25504	0.48993	0.542469	-0.266261	0.241631	-0.232146	0.429553
	810	0.766259	0.19877	1.09647	0.528523	-0.624509	0.330931	-0.117182	0.408695
	812	0.843274	0.2911	0.151894	0.433042	-0.53075	0.391955	0.0597198	0.412627
	814	0.720946	0.280686	-0.296546	0.470082	-0.200254	0.322918	-0.0212927	0.398895
	816	-0.130258	0.195922	-0.531381	0.351173	-0.225089	0.337529	0.227612	0.309227
	818	-0.145353	0.214612	-0.292379	0.279056	-0.0323303	0.30456	0.0428914	0.188759
	820	-0.0449041	0.273132	0.0537612	0.323242	0.016637	0.340886	0.220524	0.201567
	822	0.0672065	0.300825	-0.0679983	0.239456	0.0616991	0.384053	0.45749	0.215882
	824	0.136035	0.214296	0.34233	0.263324	0.135417	0.375683	0.565528	0.212858
	826	0.482812	0.219035	0.304435	0.43116	0.12642	0.374786	0.593275	0.294177
	828	0.352245	0.194712	0.940362	0.420485	-0.164257	0.348192	0.790539	0.369879
	830	0.469326	0.215987	0.225235	0.428611	-0.503723	0.379372	0.672008	0.354183
	832	0.464382	0.180808	0.62846	0.339944	-0.243306	0.348579	0.39212	0.329773
	834	0.394542	0.154763	0.0832109	0.421709	-0.314766	0.334147	0.296903	0.296001
	836	0.467778	0.142117	-0.250213	0.383717	-0.216165	0.296678	0.452964	0.198678
	838	0.518918	0.197215	-0.534786	0.552571	0.173471	0.402108	0.075854	0.177835
	840	0.177831	0.245507	0.0704739	0.397138	0.488832	0.355788	0.0495215	0.267984
	842	0.350733	0.267283	-0.109687	0.39727	0.0622308	0.436971	0.103902	0.219548
	844	0.499851	0.293226	-0.493195	0.278641	0.017514	0.430591	0.0385898	0.119904
	846	0.291879	0.316984	-0.243356	0.451023	0.304248	0.321759	0.0818402	0.209627
	848	0.102672	0.317241	-0.27773	0.191864	-0.0261032	0.273065	0.488586	0.141529
	850	0.726958	0.295234	-0.660242	0.402062	-0.458769	0.535055	0.48886	0.190712
	852	0.614415	0.294502	-0.246222	0.309125	-0.114851	0.43615	0.612202	0.128289
	854	0.515699	0.275369	-0.576569	0.56034	-0.0700557	0.287825	0.282555	0.337784
	856	0.651166	0.360337	-0.0081184	0.305828	0.00264195	0.311342	0.545215	0.401901
	858	0.853345	0.304434	-0.135895	0.442436	0.263618	0.241161	0.503896	0.410552
	860	0.404532	0.289492	0.672408	0.580405	0.237942	0.301315	0.3348	0.403104
	862	0.0218508	0.324409	1.1759	0.804799	0.368097	0.306752	0.191776	0.310699
	864	0.484216	0.405909	1.04091	0.51976	0.497496	0.360308	0.281494	0.295217
	866	0.537752	0.329662	-0.0208877	0.552176	0.44387	0.442987	0.0549963	0.366298
	868	0.492167	0.318879	0.433892	0.456636	0.113808	0.468835	0.144595	0.454685
	870	0.0562142	0.16208	0.397445	0.599918	0.149508	0.466763	0.0836898	0.455217
	872	0.147723	0.272364	-0.719856	0.578929	-0.226344	0.44265	0.382065	0.524105
	874	-0.0640221	0.412816	-0.327819	0.61358	-0.0805141	0.353565	0.862027	0.384106
	876	0.0508087	0.41462	0.606911	0.423682	-0.11818	0.319336	0.850597	0.430118
	878	0.23841	0.491013	-0.603652	0.687543	0.471707	0.368189	0.625123	0.320403
	880	0.194905	0.547865	-0.937025	0.641431	0.346084	0.350576	0.621957	0.328032
	882	0.527969	0.440398	-1.62411	0.924922	0.774773	0.279423	0.679624	0.365434
	884	0.429754	0.372251	-0.931864	0.810965	0.24801	0.207957	0.600199	0.226459
	886	0.257905	0.219465	-1.29846	0.797575	0.264006	0.221105	0.77898	0.350749
	888	0.125578	0.196025	-1.25994	0.629014	0.23026	0.31959	0.315637	0.498095
	890	-0.0316018	0.293245	-1.11953	0.208925	0.484099	0.292719	0.648733	0.32573
	892	0.158139	0.212336	-0.768496	0.297376	0.241322	0.436032	0.653336	0.38323
	894	0.030659	0.250724	-0.641836	0.310943	0.343602	0.437553	0.42824	0.434135
	896	0.0444999	0.284818	0.148897	0.387054	0.253308	0.397306	0.294128	0.416498
	898	0.154499	0.329163	0.132318	0.433226	0.41978	0.306236	0.70935	0.357768
	900	0.301682	0.304698	0.230191	0.870558	0.344346	0.393838	0.974389	0.660666
	902	0.232337	0.442316	-0.737629	0.5543	0.0756615	0.405926	0.790108	0.541271
	904	0.510504	0.37071	0.683896	1.00114	0.250978	0.2546	0.747373	0.542806
	906	0.523592	0.387061	0.136691	0.600862	-0.00154693	0.286446	0.407665	0.501006
	908	0.285341	0.433541	0.215056	0.310266	0.140476	0.341539	0.669764	0.498408
	910	0.491817	0.304609	0.287995	0.518406	0.299094	0.263756	0.426792	0.379777
	912	0.358295	0.332115	0.27976	0.731586	0.342556	0.270836	0.427896	0.425948
	914	0.0681738	0.290993	0.137658	0.719175	0.359788	0.366237	0.554235	0.353124
	916	0.208081	0.247888	-0.0834512	0.498344	0.287606	0.271979	0.734461	0.321991
	918	0.275001	0.237642	-0.273851	0.398492	0.0646101	0.403089	-0.0274758	0.372964
	920	0.342199	0.248702	-0.698754	0.226741	0.103427	0.433246	0.241037	0.352321
	922	0.112779	0.326432	-0.455721	0.429049	-0.0141345	0.288432	0.197256	0.344657
	924	0.0944458	0.355696	-0.00663536	0.395424	0.221853	0.222117	0.185529	0.351127
	926	0.0311928	0.325038	-0.462825	0.29627	0.0430563	0.355712	0.137481	0.369776
	928	-0.0739659	0.344324	-0.121807	0.363093	-0.245102	0.173089	0.0719216	0.307797
	930	0.353958	0.378448	0.187637	0.518133	0.130677	0.264756	0.104274	0.281667
	932	0.47146	0.382027	0.225693	0.543372	-0.31008	0.307119	0.0387707	0.246458
	934	0.658408	0.368876	-0.155196	0.468618	0.0121556	0.25441	0.063872	0.258513
	936	0.690077	0.368159	-0.0869875	0.49231	-0.136707	0.3509	0.176115	0.302292
	938	0.655215	0.369844	-0.238767	0.490068	-0.00618442	0.308017	0.561536	0.259263
	940	0.534645	0.279983	-0.315714	0.597369	0.386393	0.145006	0.82356	0.337772
	942	0.163234	0.285716	-0.293273	0.572988	0.711857	0.237741	0.742693	0.349632
	944	-0.203286	0.296768	0.552545	0.526079	0.622851	0.320485	0.821905	0.578701
	946	0.0290631	0.263243	0.837239	0.631792	0.73919	0.286398	0.726101	0.601121
	948	0.399134	0.320556	0.675373	0.543702	0.505245	0.198749	0.239661	0.485856
	950	0.0726149	0.32258	-0.0966725	0.33135	0.516155	0.37987	-0.135923	0.424022
	952	0.228327	0.197568	-0.0797287	0.289939	-0.177216	0.191705	0.0177094	0.384227
	954	0.407502	0.220624	-0.732361	0.556559	-0.0362424	0.160352	-0.333154	0.327208
	956	-0.372384	0.216718	-1.47283	0.621536	-0.68476	0.267156	-0.706407	0.333709
	958	-1.51089	0.366771	-2.73176	0.857632	-2.04959	0.519507	-1.77069	0.400427

## Sheet: Fig.5b
	Time traces										Post-training PKCδ activity
		No RNAi				DAMB RNAi KK110947					No RNAi		DAMB RNAi KK110947
		Control (unpaired)		5x spaced		Control (unpaired)		5x spaced			Control (unpaired)	5x spaced	Control (unpaired)	5x spaced
	Time (s)	Mean	SEM	Mean	SEM	Mean	SEM	Mean	SEM		1.00686	1.05235	1.0255	0.991594
	0	-4.63067	0.993523	-4.72757	1.45952	-6.02177	0.856397	-6.09425	0.988501		0.985156	1.03988	0.989524	0.989445
	2	-3.66024	0.909456	-2.00544	1.52509	-4.63224	0.768249	-4.34731	0.680518		0.998421	0.997076	1.01661	1.0137
	4	-2.37388	0.857763	-0.776786	1.44633	-3.52921	0.931589	-3.59091	0.690393		1.00548	1.01859	0.972138	0.992824
	6	-2.48966	0.835248	-0.274917	1.07927	-3.4629	0.919812	-3.30789	0.701359		1.00874	1.01824	1.00339	0.97031
	8	-2.04922	0.787625	0.137342	0.777776	-3.49507	0.847517	-3.53107	0.769478		0.972213	1.03337	0.997618	0.980722
	10	-2.32628	0.786175	0.299264	0.888761	-2.79481	0.537225	-3.34433	0.633256		0.998151	1.03863	0.991328	1.00678
	12	-2.78708	0.78636	0.00198527	1.05558	-2.79377	0.478743	-3.65282	0.726642		1.01529		1.0039	0.999701
	14	-3.00902	0.756887	-0.265921	0.780636	-2.78979	0.455877	-4.14152	0.793208		1.00969			0.983872
	16	-2.82898	0.72916	-0.160591	0.925542	-3.03011	0.42983	-3.82319	0.767166
	18	-2.94867	0.709307	-0.939008	1.1571	-2.56226	0.395436	-4.03948	0.725566
	20	-2.86861	0.668846	-0.0135787	1.06313	-2.82631	0.402102	-3.93088	0.661561
	22	-2.47841	0.596859	0.300593	0.978248	-2.91907	0.48463	-3.4111	0.73634
	24	-2.21494	0.469714	0.279415	0.807213	-3.10072	0.614518	-3.56672	0.581006
	26	-1.89805	0.662692	0.302114	0.724677	-2.91664	0.668245	-3.84572	0.537731
	28	-2.3097	0.578812	0.494534	0.56652	-3.24048	0.571417	-3.76408	0.474269
	30	-2.85123	0.707938	-0.0277234	0.798936	-2.90655	0.798574	-3.70576	0.484238
	32	-2.74192	0.742773	-0.182587	0.880971	-3.08817	0.671176	-3.83715	0.446317
	34	-2.54919	0.781676	0.219655	0.94021	-2.9659	0.69353	-3.81099	0.419759
	36	-2.69651	0.637885	0.264662	1.09404	-2.96635	0.39234	-4.04534	0.445798
	38	-2.54912	0.730245	0.0999556	1.0509	-3.25478	0.618543	-3.50006	0.618303
	40	-2.80405	0.523481	0.747116	1.05879	-2.87556	0.332382	-3.67448	0.473101
	42	-2.90384	0.510948	0.823502	0.993774	-2.99477	0.546916	-3.65457	0.527022
	44	-2.82769	0.523884	0.898422	0.936361	-3.53902	0.47463	-3.0747	0.621348
	46	-2.41645	0.528025	0.489508	0.836517	-3.47915	0.491079	-3.22259	0.595936
	48	-2.32287	0.379693	-0.137897	0.854471	-2.66462	0.772896	-3.66326	0.764132
	50	-2.27602	0.437138	0.0790481	0.865063	-2.98823	0.676601	-3.78417	0.675496
	52	-2.24188	0.515967	-0.125342	0.750547	-3.02421	0.694988	-3.49906	0.641529
	54	-2.07195	0.45195	0.247755	1.00448	-2.91265	0.772419	-3.27621	0.434853
	56	-2.1739	0.325861	-0.162416	1.11218	-2.71388	0.647736	-3.30792	0.394058
	58	-2.35847	0.483276	0.221674	1.19157	-2.72443	0.698498	-2.92401	0.327173
	60	-2.41131	0.456527	0.599886	1.17506	-2.88122	0.389594	-3.28374	0.50379
	62	-2.57277	0.487473	-0.341878	0.877038	-2.85041	0.449059	-2.92991	0.530464
	64	-2.75241	0.395915	-0.115213	0.658634	-2.6677	0.358258	-3.51225	0.710351
	66	-2.57019	0.296118	0.0428417	0.626553	-2.97937	0.475035	-3.20048	0.751609
	68	-2.49176	0.323926	0.909786	0.779681	-2.98945	0.521161	-2.93201	0.728892
	70	-2.4576	0.23338	1.03435	0.737862	-3.10364	0.620683	-2.60476	0.698987
	72	-2.16144	0.263921	1.07115	0.83079	-3.36462	0.592315	-3.08774	0.573288
	74	-1.91996	0.428569	1.80394	1.23068	-3.61076	0.539837	-2.65199	0.51834
	76	-1.96341	0.46595	1.81097	1.28131	-3.10309	0.497032	-2.98443	0.524577
	78	-2.14095	0.529387	1.64358	1.21008	-3.24605	0.573735	-3.47393	0.529563
	80	-1.86239	0.602135	0.7101	1.08835	-2.34443	0.720358	-3.41023	0.60054
	82	-1.90901	0.607486	0.220765	1.01816	-2.31096	0.745365	-3.42803	0.529601
	84	-1.83763	0.593797	-0.223345	0.85843	-2.50419	0.449523	-3.90496	0.483905
	86	-2.20121	0.486022	-0.147753	0.672412	-2.12067	0.393626	-3.3871	0.415803
	88	-2.66265	0.430416	-0.171714	0.857574	-2.37819	0.367642	-3.34747	0.404238
	90	-2.57823	0.605414	0.348478	1.11058	-2.58852	0.424377	-3.55049	0.374191
	92	-2.54984	0.585284	0.17807	0.997521	-2.47683	0.439468	-3.21494	0.444502
	94	-2.49856	0.702096	0.608216	1.05826	-2.11672	0.375151	-2.65544	0.558202
	96	-2.30223	0.861655	0.358965	1.02165	-2.8052	0.674732	-2.61554	0.562773
	98	-2.12254	0.662899	0.512541	1.04093	-2.92244	0.797917	-3.22896	0.690714
	100	-2.33748	0.563599	0.42371	0.97571	-3.02762	0.810576	-3.17075	0.437479
	102	-2.457	0.626676	0.460219	1.07984	-3.29869	0.817409	-3.38754	0.43287
	104	-2.62457	0.489083	0.7885	0.887952	-3.11862	0.9242	-3.64692	0.374977
	106	-2.20266	0.464933	1.18089	0.862021	-2.54246	0.688324	-3.31845	0.543135
	108	-2.12812	0.468482	1.00462	0.709166	-2.89082	0.597511	-3.36942	0.647041
	110	-2.32223	0.395326	1.20205	0.768732	-2.84264	0.595027	-3.21251	0.685625
	112	-1.88897	0.374128	1.02968	0.908227	-3.0196	0.341823	-2.95312	0.535392
	114	-1.89053	0.442651	0.550593	0.925284	-3.39265	0.325047	-3.019	0.622867
	116	-2.3591	0.441053	0.151174	0.844758	-3.65632	0.267799	-3.12996	0.597503
	118	-3.61241	0.978887	-0.427747	1.01979	-3.75183	0.311554	-3.42271	0.467566
	120	-4.35932	0.923531	-1.87301	1.1479	-4.66703	0.80751	-4.14001	0.57895
	122	-4.43505	0.750603	-2.15171	0.994932	-4.62929	0.800355	-4.43004	0.587182
	124	-4.52307	0.793542	-1.79986	1.06879	-3.57989	0.260045	-4.09888	0.626551
	126	-3.9949	0.596959	-2.00591	1.25125	-3.36597	0.513851	-3.44842	0.718607
	128	-3.83324	0.689335	-2.18671	1.63543	-2.99453	0.434305	-2.96613	0.660384
	130	-3.60806	0.747372	-1.05963	1.63268	-2.97228	0.630173	-2.7337	0.806314
	132	-3.79229	0.816954	-0.717049	1.66862	-2.83107	0.54738	-2.59975	0.641439
	134	-3.07634	0.671005	-0.498661	1.51738	-2.54037	0.520963	-2.89705	1.11052
	136	-3.1148	0.716009	-1.123	1.84714	-2.72792	0.564304	-3.43079	1.18759
	138	-3.05721	0.664858	-1.17648	1.80789	-2.81037	0.546853	-3.88253	1.17715
	140	-2.4108	0.719244	-1.20218	1.46982	-2.8961	0.564589	-3.52292	1.19431
	142	-1.93993	0.695473	-1.00995	1.28191	-3.08064	0.74884	-3.7271	1.48189
	144	-2.17941	0.779486	-1.3522	1.6782	-2.98436	0.802019	-3.38524	1.2329
	146	-2.50051	0.6345	-0.473096	1.06981	-2.94037	0.740538	-2.47435	0.962483
	148	-2.98948	0.679414	-0.196059	0.992491	-2.52595	0.810357	-2.16102	0.872469
	150	-2.43054	0.672487	-0.0175696	1.44376	-2.35766	0.6326	-2.1557	1.01576
	152	-2.34566	0.647874	-0.235004	1.45464	-2.33839	0.636582	-2.27684	0.930841
	154	-2.72862	0.541454	-0.0944809	1.07841	-2.31571	0.513678	-2.14869	0.844372
	156	-2.89767	0.537309	0.224728	1.31646	-2.52829	0.514527	-2.30975	0.823617
	158	-2.47097	0.578682	0.645233	1.17973	-2.54165	0.596037	-2.2814	0.764772
	160	-2.34315	0.53687	0.313476	0.878532	-2.7591	0.593745	-2.5982	0.893083
	162	-1.88539	0.452876	0.123282	0.671665	-2.64788	0.665856	-2.13992	0.999096
	164	-1.42445	0.427517	0.757898	1.05516	-2.3692	0.601276	-2.59035	1.15779
	166	-1.44908	0.344647	0.759539	1.04645	-2.12458	0.600773	-2.37938	1.27082
	168	-1.24779	0.445309	1.35369	0.972909	-1.8277	0.462141	-2.11782	1.00575
	170	-1.43949	0.497717	0.509601	1.01469	-1.68734	0.433909	-1.71731	0.779537
	172	-1.6878	0.483695	0.249669	1.08859	-1.7324	0.355118	-1.90656	0.742826
	174	-1.33216	0.496141	0.772673	0.91743	-1.90302	0.376567	-1.66318	0.738009
	176	-1.1161	0.543589	-0.470506	0.934432	-1.34552	0.436081	-1.40941	0.654334
	178	-1.66296	0.531797	-0.134267	0.748302	-1.49152	0.289875	-1.4191	0.73196
	180	-1.56981	0.54583	-0.754763	0.964027	-2.01889	0.308757	-1.68441	0.934113
	182	-1.26925	0.513995	-0.420491	0.921283	-1.46849	0.405015	-1.56486	0.878891
	184	-1.51884	0.523265	-0.592003	0.856249	-1.72279	0.406319	-1.42936	0.88261
	186	-0.996382	0.466211	-0.00657094	0.628269	-2.31321	0.727405	-1.57737	0.865317
	188	-0.873148	0.504304	0.684247	0.577989	-2.48359	0.797021	-1.81745	0.79872
	190	-0.717354	0.469542	0.816195	0.435757	-2.32254	0.768343	-2.11897	0.57632
	192	-1.02149	0.495177	1.02328	0.518539	-1.83746	0.422646	-1.80853	0.518693
	194	-0.811542	0.535817	0.931553	0.499403	-1.48316	0.79267	-1.53833	0.628473
	196	-1.19045	0.577036	1.23193	0.581848	-0.981906	0.501922	-0.976938	0.817974
	198	-1.51856	0.469925	0.811676	0.572248	-1.2768	0.502029	-0.80185	0.661024
	200	-1.00591	0.312679	0.271748	0.537988	-1.49328	0.473411	-0.0784915	0.595664
	202	-0.901088	0.486322	0.0495679	0.665698	-1.38105	0.416632	0.0224046	0.568041
	204	-1.27374	0.52948	0.0225719	0.796691	-1.51407	0.381426	-0.618256	0.550007
	206	-1.35171	0.576905	-0.170728	0.82695	-1.39005	0.423865	-0.738649	0.630198
	208	-1.35704	0.684612	-0.348966	0.988844	-0.485821	0.463009	-1.15196	0.775157
	210	-1.30958	0.635115	-0.123058	0.890878	-0.24052	0.46764	-1.06373	0.502593
	212	-1.40166	0.646704	-0.31773	0.907744	-0.791367	0.635698	-1.3179	0.554741
	214	-1.18937	0.511772	-0.475596	1.12469	-0.975552	0.608866	-1.59362	0.797847
	216	-0.843575	0.452319	1.02517	0.630207	-0.999212	0.672608	-1.64203	0.7084
	218	-1.08908	0.340622	0.656159	0.667335	-1.60526	0.546146	-1.07802	0.562131
	220	-1.31308	0.355627	0.765344	0.568406	-1.10068	0.461835	-0.891262	0.68519
	222	-1.46454	0.600351	0.720661	0.358872	-1.01223	0.469454	-0.327407	0.634103
	224	-1.44061	0.508252	1.23356	0.334805	-1.19166	0.453796	-0.785763	0.395886
	226	-1.52771	0.569767	0.935555	0.356258	-0.945907	0.376101	-0.481854	0.503491
	228	-0.666221	0.347253	1.01019	0.394611	-0.821829	0.372549	-1.25285	0.827028
	230	-0.57594	0.323456	0.340018	0.616969	-1.42457	0.446978	-0.938155	0.687993
	232	-0.659985	0.278759	0.0587487	0.68926	-1.07541	0.436394	-0.677979	0.419391
	234	-0.144869	0.267072	0.523957	0.811325	-0.873642	0.315561	-0.816544	0.529702
	236	0.116513	0.461057	0.985125	0.718206	-1.0235	0.35588	-0.620285	0.451505
	238	-0.653277	0.557076	0.615969	0.793596	-0.858339	0.501829	-0.468075	0.33404
	240	-0.116601	0.579028	0.0305349	0.672258	-0.842671	0.395624	-0.662932	0.365536
	242	0.0631123	0.626541	0.351365	0.636189	-0.73716	0.418174	-0.585939	0.43825
	244	-0.0888911	0.636535	0.161982	0.635542	-0.664528	0.425882	-0.919825	0.58839
	246	-0.412107	0.565545	-0.270836	0.533881	-0.62864	0.404515	-1.24988	0.714164
	248	-0.0780991	0.457648	0.98507	1.31415	-0.695882	0.479451	-1.08322	0.901137
	250	0.0606476	0.408782	0.522559	1.39916	-0.551891	0.480445	-1.29471	0.732417
	252	-0.15872	0.377483	-0.109801	0.622433	-0.520491	0.405265	-1.07188	0.782528
	254	0.240578	0.301342	0.0589688	0.672657	-0.541253	0.545203	-0.707267	0.777693
	256	0.284073	0.256109	-0.0894191	0.647869	-0.596356	0.438723	-0.273701	0.581459
	258	-0.418864	0.4266	-0.439845	0.30806	-0.656174	0.395071	-0.809615	0.723504
	260	-0.425659	0.372738	-0.596828	0.429728	-0.891558	0.472785	-1.34909	0.660151
	262	-0.523736	0.404948	-0.431351	0.567529	-0.212579	0.376211	-1.62331	0.686265
	264	-0.545331	0.382014	-0.361238	0.700525	-0.51062	0.357425	-1.74484	0.689258
	266	-0.688855	0.388918	0.099301	0.565054	0.145862	0.322148	-1.83752	0.713248
	268	-0.0326538	0.347531	0.0046238	0.627089	-0.863933	0.472138	-1.82239	0.515057
	270	0.240644	0.398309	-0.297857	0.876128	-0.258617	0.209772	-1.03843	0.458435
	272	0.216045	0.3198	-0.120035	0.952041	-0.2794	0.367026	-1.2203	0.524055
	274	0.031701	0.392087	0.0540716	0.488822	-0.992253	0.408402	-0.718215	0.778455
	276	-0.281562	0.503386	0.0637757	0.783093	-0.861302	0.511342	-0.646053	0.747367
	278	-0.564928	0.414204	0.370585	0.521221	-0.787964	0.420022	-0.386539	0.674203
	280	-0.902987	0.46596	0.466971	0.725497	-0.525603	0.583205	-0.808338	0.587218
	282	-0.829632	0.455935	-0.0646371	0.987863	-0.551381	0.574423	-0.806275	0.607623
	284	-0.483362	0.417138	-0.0528784	1.27084	-0.102232	0.52938	-1.10913	0.731067
	286	-0.143545	0.487072	-0.379849	1.44666	-0.570785	0.469216	-1.10279	0.719851
	288	-0.408737	0.497872	-1.07106	1.34789	-0.584821	0.415713	-1.28459	0.608562
	290	-0.135387	0.365323	-1.33017	1.27598	-0.177787	0.282382	-1.00673	0.318419
	292	-0.639346	0.649031	-0.874665	1.20322	-0.357503	0.333	-1.39513	0.407623
	294	-0.809072	0.469918	-0.51367	0.744028	-0.556436	0.384573	-1.05697	0.378505
	296	-0.379474	0.389039	-0.222951	0.702817	-0.567937	0.455059	-1.62441	0.452125
	298	-0.153137	0.366445	0.0969173	0.690754	-0.343548	0.410533	-1.10654	0.471415
	300	0.094524	0.373242	-0.123646	0.382163	-0.360801	0.510051	-1.00633	0.607643
	302	-0.293653	0.351989	-0.0403591	0.334558	-0.646848	0.580493	-1.07946	0.482787
	304	-0.0915022	0.28162	0.0669858	0.426582	-0.594768	0.605945	-1.40502	0.507036
	306	-0.613304	0.259162	-0.133046	0.337488	-0.828145	0.744617	-1.48169	0.418955
	308	-0.275469	0.194391	-0.625348	0.328165	-0.966317	0.636472	-1.69249	0.518905
	310	-0.889946	0.300806	-0.294683	0.428099	-0.322316	0.613039	-1.72976	0.464791
	312	-0.545134	0.362573	0.281089	0.577395	-0.429658	0.580679	-1.82965	0.540538
	314	-0.218499	0.373404	0.583583	0.698935	-0.534957	0.519364	-1.57398	0.648195
	316	0.226301	0.364709	0.441788	0.684096	-0.494738	0.581155	-1.64413	0.536997
	318	-0.0206869	0.470758	-0.00499167	0.824089	-0.24044	0.559814	-1.27268	0.479686
	320	0.0444444	0.482772	0.265413	0.750293	-0.244085	0.555163	-1.05394	0.585483
	322	-0.315313	0.553872	0.364213	0.397832	-0.346036	0.578615	-0.803914	0.617781
	324	-0.191875	0.513886	-0.317925	0.94243	-0.617127	0.645188	-0.710435	0.67508
	326	-0.444656	0.620609	-0.248098	0.940969	-0.461977	0.706181	-0.909412	0.731206
	328	-0.291209	0.49056	0.538282	0.386116	0.047222	0.674743	-1.33299	0.795856
	330	-0.414007	0.65877	0.677534	0.406068	-0.35614	0.634485	-1.39679	0.72386
	332	-0.245493	0.57903	0.800722	0.435778	-0.00522773	0.4934	-0.927202	0.667711
	334	-0.32783	0.55737	1.08413	0.377415	0.0752457	0.591164	-1.1393	0.542713
	336	-0.131094	0.474201	1.45191	0.809456	0.384695	0.413858	-1.03276	0.543619
	338	-0.246314	0.452805	1.1389	0.692119	0.254546	0.363812	-1.22143	0.417786
	340	-0.208529	0.429136	0.908587	0.553021	-0.0873166	0.420116	-1.39767	0.451464
	342	-0.339105	0.433977	0.374347	0.452759	0.0809594	0.270856	-1.24279	0.688321
	344	-0.392828	0.565569	-0.192527	0.444332	-0.0599951	0.223127	-1.11698	0.727694
	346	-0.147185	0.498696	-0.473387	0.701575	-0.614104	0.394618	-1.28453	0.795658
	348	-0.431424	0.544519	-0.523992	0.658501	-0.517403	0.291534	-0.946966	0.783356
	350	-0.411766	0.635488	-0.315253	0.967269	-0.172618	0.261789	-0.398929	0.615019
	352	-0.204869	0.616602	0.300966	0.66536	-0.187023	0.451821	-0.643406	0.499977
	354	-0.248892	0.537423	0.0159057	0.458168	-0.0457234	0.441461	-0.36076	0.542074
	356	-0.553477	0.43247	0.817213	0.348928	-0.17682	0.347591	-0.591827	0.546353
	358	-0.963268	0.26826	0.417081	0.28013	-0.351131	0.334197	-0.68063	0.610563
	360	-1.22016	0.1582	0.183736	0.406937	-0.573912	0.263547	-0.482411	0.566642
	362	-1.17391	0.257	0.367044	0.358464	-0.324445	0.277664	-0.436637	0.5725
	364	-0.926334	0.271511	0.396091	0.371499	-0.788041	0.488532	-0.538475	0.584074
	366	-0.544829	0.223746	-0.265994	0.329529	-0.62089	0.505654	-0.787815	0.652871
	368	-0.121985	0.396023	0.201781	0.267575	0.0406717	0.258685	-1.1652	0.61934
	370	-0.000390138	0.443255	-0.0761044	0.304636	-0.149542	0.339953	-0.975839	0.593167
	372	0.144301	0.507058	-0.168161	0.219201	-0.115762	0.44075	-0.523427	0.631857
	374	0.203306	0.472463	-0.0713461	0.18731	0.21254	0.419012	-0.782093	0.559645
	376	0.0206174	0.272536	0.245865	0.336002	-0.70404	0.428498	-0.732053	0.475828
	378	-0.204802	0.221868	0.311686	0.507299	-0.403242	0.495316	-0.905622	0.373492
	380	-0.544633	0.354961	0.59975	0.468659	-0.967246	0.797734	-0.578268	0.578482
	382	0.143993	0.378326	0.488348	0.431753	-1.28459	0.715568	-0.740372	0.47392
	384	-0.352311	0.245201	0.878687	0.56248	-1.67334	0.655871	-0.817092	0.589174
	386	-0.177756	0.343309	1.32662	0.59377	-0.548135	0.441622	-0.655645	0.63961
	388	-0.309184	0.482605	0.309586	1.09775	-0.217198	0.409576	-0.563676	0.51128
	390	-0.887894	0.491911	0.230048	0.593168	-0.150093	0.414113	-0.898028	0.509291
	392	-0.886084	0.431062	0.153365	0.748342	0.249031	0.393276	-0.715097	0.481411
	394	-0.999578	0.414257	0.637519	0.616779	0.4734	0.446854	-0.448288	0.586135
	396	-0.944778	0.507189	-0.0281017	0.904494	0.140465	0.433154	-0.455001	0.530044
	398	-1.16105	0.313165	0.346958	0.671087	-0.48163	0.466916	-0.446248	0.461967
	400	-0.934391	0.336919	0.716283	0.491616	-1.1507	0.465673	-0.353426	0.426223
	402	-1.38706	0.369777	0.694955	0.4705	-1.17661	0.495486	0.0116646	0.374279
	404	-1.03648	0.465832	0.114045	0.563491	-0.878216	0.675933	0.157488	0.509559
	406	-1.17664	0.382463	-0.120074	0.676288	-0.479199	0.691008	0.0870494	0.39533
	408	-0.786661	0.513047	-0.225031	0.308594	0.0509513	0.563327	0.25337	0.388335
	410	-1.06643	0.462096	-0.391466	0.407621	-0.0245217	0.443018	0.388635	0.381148
	412	-0.708972	0.378252	-0.113933	0.941084	0.00649491	0.404203	-0.0290013	0.178894
	414	-0.349665	0.23546	0.617037	0.539335	-0.299866	0.42437	-0.0592459	0.231547
	416	-0.319078	0.273193	0.931711	0.580937	-0.332557	0.36355	-0.732806	0.643038
	418	-0.475725	0.27676	-0.00920741	0.690861	-0.84709	0.316043	-1.45315	0.682014
	420	-0.595675	0.432473	0.0451339	0.494651	-0.782192	0.315735	-1.02661	0.729126
	422	-0.605762	0.326432	0.20151	0.376191	-0.938955	0.361672	-0.624902	0.810644
	424	-0.118313	0.328542	-0.33589	0.733287	-0.484308	0.473281	-0.896571	0.74671
	426	0.150662	0.459071	-0.0298144	0.607944	-0.586111	0.446134	-0.369772	0.716352
	428	0.334582	0.442498	-0.218194	0.636169	-0.684344	0.395595	-0.48062	0.53137
	430	0.466403	0.414515	-0.253614	0.660708	-0.420213	0.259798	-0.810248	0.515093
	432	0.751888	0.528769	-0.438214	0.479527	-0.197696	0.426048	-0.295727	0.581548
	434	0.582338	0.58101	-0.135359	0.457458	-0.45337	0.232403	-0.527079	0.666273
	436	0.535521	0.428731	-0.671665	0.721322	-0.279189	0.403422	-0.748959	0.656454
	438	0.286548	0.316168	-0.218785	0.718382	0.0295168	0.420061	-0.627087	0.574282
	440	0.408572	0.349997	-0.715021	0.767561	-0.0320639	0.391794	-0.971563	0.511495
	442	0.176683	0.269843	0.105676	0.804703	-0.0282046	0.391997	-0.683225	0.474275
	444	-0.409021	0.202068	0.580074	0.576413	-0.163657	0.39468	-0.526194	0.543518
	446	-0.0629912	0.38481	0.199219	0.321897	-0.591462	0.299274	-0.282537	0.563828
	448	0.12856	0.398806	0.270538	0.442719	-0.397429	0.276943	0.172667	0.537786
	450	-0.194189	0.341707	0.146648	0.509057	-0.0914413	0.378421	0.689978	0.533654
	452	-0.395847	0.194502	-0.324792	0.262957	-0.510221	0.287013	0.581933	0.538175
	454	-0.0991669	0.219535	-0.305651	0.398414	-0.486281	0.295147	0.123203	0.610276
	456	0.0330141	0.265119	-1.06725	1.04227	-0.376758	0.387079	0.176879	0.623519
	458	0.102681	0.385837	-0.816569	0.631946	-0.733554	0.334687	-0.572855	0.537273
	460	-0.349863	0.226948	-0.2175	0.338146	-0.565797	0.374701	-0.577738	0.488976
	462	-0.353638	0.444525	-0.354054	0.37894	-0.747191	0.356815	-0.405582	0.544441
	464	-0.711512	0.547212	-0.663488	0.377408	-0.7832	0.354883	-0.231645	0.419685
	466	-1.08687	0.552977	0.169667	0.404243	-0.650008	0.440221	-0.102621	0.591532
	468	-0.359848	0.582911	0.126576	0.615138	-0.529061	0.433739	0.382034	0.774947
	470	-0.647423	0.58138	-0.0667589	0.519146	-0.499275	0.415391	0.160032	0.598769
	472	-0.863384	0.560429	0.126268	0.31736	-0.725065	0.469522	0.311513	0.556629
	474	-0.456161	0.543521	0.211911	0.126897	-0.792646	0.605406	-0.0558369	0.50149
	476	-0.320176	0.531794	-0.17898	0.570048	-0.240076	0.667205	-0.123611	0.492773
	478	-0.134994	0.264795	-0.190269	0.597466	-1.18687	0.534812	-0.181842	0.449193
	480	-0.590162	0.431196	0.116351	0.745151	-0.726752	0.690256	-0.141787	0.390828
	482	-0.373541	0.420052	0.289809	0.822552	-0.786644	0.58958	-0.463595	0.352638
	484	-0.372951	0.356917	0.297156	0.948699	-1.1464	0.234628	-0.339211	0.628476
	486	-0.423366	0.323074	0.6875	0.525079	-0.930714	0.132723	0.0867617	0.422532
	488	-0.479599	0.198369	0.801504	0.427541	-0.486408	0.345182	0.077585	0.392732
	490	-0.281092	0.200987	0.83424	0.367801	-0.244169	0.326179	-0.114061	0.520159
	492	-0.314901	0.274986	0.898956	0.318099	-0.599435	0.245942	0.168383	0.635129
	494	-0.521813	0.218384	0.621814	0.48052	-0.445522	0.363051	0.163539	0.639382
	496	-0.570326	0.312208	-0.103156	0.591169	-0.740147	0.398974	0.125416	0.576612
	498	-0.456743	0.364324	0.292292	0.580431	-0.968599	0.344275	-0.372817	0.50788
	500	-0.525949	0.371338	0.365319	0.331559	-0.911544	0.307016	-0.422451	0.439179
	502	-0.271291	0.476769	-0.684993	0.628297	-0.519604	0.543033	-0.88532	0.554615
	504	-0.223844	0.447731	-0.945271	0.739812	-0.00254309	0.545985	-1.46208	0.499508
	506	0.147499	0.332245	-0.925181	0.758609	-0.759346	0.788515	-0.834162	0.386071
	508	0.301626	0.480853	-0.775725	0.950906	-0.430447	0.618104	-0.632726	0.347735
	510	0.0611934	0.343398	-0.173086	0.844835	-0.92779	0.724197	-0.625087	0.290341
	512	0.0203552	0.329889	-0.248994	0.762331	-0.875141	0.417317	-0.187403	0.3271
	514	0.38863	0.493547	0.199675	0.43605	-0.900203	0.233262	-0.094954	0.414383
	516	-0.0885989	0.477831	0.604832	0.342914	-1.14184	0.4566	0.0656704	0.508333
	518	0.296163	0.485885	1.56626	0.666685	-0.761676	0.546074	-0.246096	0.59502
	520	-0.106189	0.420582	0.371706	0.407913	-0.623907	0.420578	-0.0219791	0.726095
	522	-0.800166	0.469431	0.542567	0.600928	-0.479958	0.349192	-0.118855	0.637544
	524	-0.769647	0.622371	0.625317	0.282542	-0.242755	0.256641	0.0113753	0.700495
	526	-0.688434	0.62119	0.416986	0.345976	-0.48246	0.354461	-0.135786	0.532453
	528	-0.441868	0.583072	0.346607	0.223577	-0.798725	0.330295	0.455735	0.62688
	530	-0.390007	0.459778	0.663031	0.552148	-0.641288	0.430886	0.307411	0.330713
	532	-0.225763	0.193234	0.303166	0.562834	-0.274108	0.319431	0.0426913	0.352188
	534	-0.213895	0.221132	0.357276	0.808044	0.113576	0.395116	0.0931182	0.235042
	536	-0.276527	0.328747	0.325727	0.579284	-0.281035	0.42911	-0.14805	0.325562
	538	-0.152778	0.167787	-0.0792035	0.443228	-0.446756	0.483378	0.0260508	0.475747
	540	-0.0237053	0.352917	-0.294116	0.389458	-0.308184	0.496872	-0.0186525	0.671382
	542	0.0668831	0.397402	0.173787	0.286958	-0.593765	0.680912	0.354548	0.627282
	544	-0.317939	0.389198	0.0808161	0.27567	-0.583722	0.565693	0.651272	0.634021
	546	-0.959475	0.384213	0.0402993	0.36291	-0.0688694	0.495389	0.713285	0.712284
	548	-0.926057	0.369982	-0.130569	0.40624	-0.0152305	0.428744	0.734636	0.618306
	550	-0.958695	0.362298	0.300248	0.490574	-0.0405586	0.295564	0.573611	0.545825
	552	-1.05639	0.387372	-0.287472	0.855431	-0.46253	0.349024	0.274685	0.508077
	554	-0.984636	0.376499	0.537784	0.794129	-0.164031	0.499312	-0.460722	0.436927
	556	-0.588849	0.466966	0.601616	0.502585	-0.696414	0.482827	-0.294885	0.497648
	558	-0.382262	0.470665	0.543828	0.715631	-0.714171	0.485984	-0.0296036	0.383185
	560	-0.463383	0.449439	0.166492	0.744023	-0.642374	0.496519	0.02832	0.520507
	562	-0.781481	0.438168	0.77356	0.70815	0.196286	0.249571	0.34789	0.540937
	564	-0.573606	0.431286	0.416177	0.822517	0.124296	0.28787	0.421455	0.55408
	566	-0.726176	0.319495	0.725461	0.829201	0.151466	0.447583	0.0335757	0.622199
	568	-0.71612	0.304369	1.17022	0.794935	-0.154748	0.467416	-0.296337	0.360857
	570	-0.616957	0.334583	0.419869	0.711402	0.201718	0.458411	0.00571276	0.238594
	572	-0.237022	0.409256	0.180536	0.541501	-0.497677	0.510165	0.289066	0.412483
	574	-0.603338	0.329177	-0.361741	0.346501	-0.615707	0.367449	0.522096	0.31338
	576	-0.289567	0.421109	-1.12522	0.345587	-0.980791	0.480219	0.350949	0.392971
	578	-0.252706	0.348334	-0.402967	0.262606	-0.898525	0.59744	0.124218	0.502952
	580	-0.326963	0.250862	-0.193912	0.424037	-0.818567	0.542224	-0.0801747	0.504537
	582	0.239245	0.398264	-0.173671	0.524749	-0.669644	0.666815	0.233218	0.412871
	584	0.137759	0.406807	-0.135665	0.521536	-0.500584	0.646966	0.290437	0.529105
	586	0.115401	0.349285	-0.382923	0.736149	-0.388254	0.479383	0.136386	0.537011
	588	0.219526	0.444142	-0.835849	0.778046	-0.692583	0.229472	-0.0744769	0.37693
	590	-0.189634	0.384239	-0.509074	0.557418	-0.499673	0.443171	-0.0664887	0.369139
	592	-0.531614	0.245992	-0.881097	0.601347	-0.29855	0.500548	-0.488856	0.425151
	594	-0.495875	0.276144	-0.0661348	0.425549	-0.496987	0.664656	-0.462879	0.483618
	596	-0.276919	0.278642	-0.422669	0.555545	-0.691507	0.645106	-0.313461	0.407649
	598	-0.804748	0.300874	-0.554631	1.20038	-0.529249	0.630246	-0.184886	0.45845
	600	-0.708273	0.26286	-0.00279909	1.24408	-0.243776	0.445253	-0.233954	0.346503
	602	-0.541681	0.345741	-0.455085	1.02104	-0.131895	0.383752	0.102691	0.383739
	604	-0.392208	0.298238	-0.557744	0.745935	-0.280283	0.535913	0.17805	0.417319
	606	-0.467499	0.276972	0.294026	0.607832	-0.221689	0.323317	0.607526	0.524531
	608	-0.26531	0.386703	0.54414	0.462393	-0.224259	0.229321	0.610866	0.541081
	610	-0.25735	0.399475	0.358126	0.654726	0.0692959	0.221485	0.563885	0.662756
	612	-0.11097	0.429962	0.0910427	0.534655	0.124272	0.296152	0.0659294	0.499841
	614	-0.0700035	0.329082	0.843345	0.598897	0.259268	0.331662	-0.134733	0.44967
	616	0.0179657	0.384335	0.270556	0.726325	0.498579	0.279719	-0.690913	0.267814
	618	0.151729	0.289886	-0.200891	0.526756	0.0703413	0.22943	-0.697563	0.36953
	620	0.111623	0.32609	0.108927	0.498795	-0.298941	0.377608	-0.476184	0.387624
	622	0.166421	0.409703	0.713052	0.564912	-0.0538638	0.619693	-0.21527	0.333767
	624	0.174531	0.382063	0.679695	0.600625	-0.464161	0.586543	-1.37175	0.512044
	626	-0.174009	0.286315	0.262022	0.601974	-0.468531	0.385175	-1.25283	0.513254
	628	0.126298	0.307536	-0.72584	0.795029	-0.110412	0.533225	-0.952454	0.573514
	630	-0.060015	0.321755	-1.47412	0.731528	0.323788	0.44089	-0.917675	0.615698
	632	-0.0352841	0.223689	-1.68707	0.871632	-0.049019	0.420856	-0.806058	0.544256
	634	-0.239287	0.374462	-1.71613	0.967074	0.222568	0.501097	-0.531392	0.305134
	636	-0.270019	0.333502	-1.01873	0.866199	0.43019	0.414536	-0.129514	0.360959
	638	0.0253731	0.39768	-0.156993	0.522047	0.44207	0.435175	-0.20912	0.542149
	640	-0.105081	0.423923	0.0696021	0.556687	0.290744	0.4729	-0.264939	0.408987
	642	0.0305325	0.338745	-0.304313	0.541295	-0.00762306	0.600743	0.28551	0.419584
	644	0.0478	0.33711	-0.330971	0.653573	-0.521646	0.764181	0.748688	0.405499
	646	-0.276223	0.387834	-0.590081	0.499151	-0.490898	0.674577	0.851385	0.489569
	648	-0.226832	0.386892	0.103957	0.409717	0.0378226	0.41295	1.7786	0.680601
	650	0.164624	0.304874	-0.0224785	0.428276	-0.128377	0.485701	1.45373	0.719326
	652	-0.125382	0.427368	0.334876	0.50434	0.0149936	0.527715	0.70775	0.678589
	654	-0.381395	0.297862	0.462586	0.295773	0.0639278	0.324124	0.129699	0.793534
	656	-0.172103	0.425103	0.580242	0.48525	-0.141496	0.319318	0.343582	0.653594
	658	-0.496003	0.301165	0.0456591	0.350045	-0.172528	0.582786	0.11902	0.641436
	660	-0.404067	0.299388	0.0257187	0.455888	-0.11027	0.338326	0.219496	0.528916
	662	-0.416765	0.394766	0.304437	0.529112	-0.138351	0.313612	-0.260464	0.500124
	664	-0.463722	0.403431	-0.384909	0.63896	-0.353204	0.32056	-0.0332511	0.478768
	666	-0.321051	0.414505	0.62526	1.18074	-0.212153	0.423002	0.0282715	0.524161
	668	-0.216966	0.566152	0.717648	1.22591	-0.136782	0.401767	0.656325	0.333113
	670	-0.204644	0.406355	0.259807	1.01477	-0.351566	0.484105	1.06424	0.267724
	672	-0.114143	0.519826	0.0329563	0.917962	-0.474832	0.659452	1.00716	0.461497
	674	-0.491093	0.414161	-0.0123522	0.723675	0.122711	0.552885	0.815158	0.341152
	676	-0.318981	0.383632	0.0704005	0.399526	-0.623027	0.221108	0.60194	0.49042
	678	-0.421351	0.187675	0.711433	0.532603	-0.0766526	0.298866	0.154999	0.51893
	680	-0.382138	0.391481	0.0177164	0.407305	-0.293954	0.412992	0.296583	0.515678
	682	-0.60378	0.384829	-0.70928	0.592192	0.121132	0.517017	-0.0919806	0.406463
	684	-0.153979	0.333929	-0.710552	0.530738	0.232617	0.38739	0.177265	0.475737
	686	-0.174615	0.500145	-0.577162	0.410781	0.219973	0.47587	-0.073563	0.503967
	688	0.0304291	0.447998	-0.657868	0.404542	0.130548	0.248073	-0.343392	0.539071
	690	0.150922	0.436293	-0.00966709	0.414449	1.04937	0.225349	-0.107408	0.452387
	692	0.276292	0.291411	0.0515057	0.493474	0.597203	0.325295	0.903998	0.46051
	694	0.0758909	0.3224	-0.356192	0.735106	0.530815	0.382475	0.172453	0.538803
	696	-0.226305	0.30437	-0.411439	0.821699	0.0587269	0.459866	0.189945	0.413817
	698	-0.116032	0.287369	-0.408781	0.832489	0.0542851	0.52847	0.619491	0.455332
	700	-0.236552	0.350886	0.0570424	1.2502	0.0120356	0.497105	0.161015	0.510258
	702	0.186516	0.263626	0.015197	0.653771	0.367581	0.431636	-0.0239461	0.401108
	704	0.150739	0.336386	-0.0742896	0.644004	-0.374073	0.575158	0.137193	0.380044
	706	0.615731	0.661141	-0.14293	0.648276	0.644285	0.164232	0.635164	0.382556
	708	0.578412	0.577486	0.0467324	0.527533	0.274415	0.250243	0.384835	0.519358
	710	0.54518	0.621417	0.115831	0.443397	-0.0109938	0.497956	0.343099	0.316948
	712	0.479648	0.379054	0.162777	0.419449	0.291667	0.267323	-0.115886	0.306157
	714	0.412636	0.301332	-0.478353	0.563103	0.26322	0.325386	-0.104447	0.301747
	716	0.279533	0.34045	-0.33184	0.374631	-0.245676	0.30414	-0.000843487	0.324126
	718	0.0319725	0.379161	0.0357004	0.423378	-0.262511	0.300183	-0.0918028	0.422868
	720	0.169972	0.330404	0.261583	0.235598	-0.369667	0.2442	0.0887048	0.43892
	722	0.245327	0.316941	0.932351	0.457248	-0.529355	0.234919	0.0846741	0.357872
	724	-0.113268	0.372229	1.62588	0.712077	0.0646253	0.286535	0.456342	0.460333
	726	-0.700484	0.341223	1.08787	0.38304	0.376675	0.288355	-0.0119845	0.504677
	728	-0.287714	0.25607	1.22116	0.350415	0.629767	0.247508	0.389159	0.561857
	730	-0.456371	0.318782	0.44427	0.406075	0.151441	0.168569	0.474388	0.647945
	732	-0.668048	0.382416	0.791337	0.677017	0.38047	0.118436	-0.0833755	0.507343
	734	-0.264819	0.307937	-0.352339	0.173881	0.52687	0.347724	0.191929	0.343207
	736	0.0594514	0.327323	0.903208	0.778002	0.46892	0.406212	0.252671	0.282019
	738	0.578907	0.339546	1.12912	0.927878	0.25059	0.474874	0.0541073	0.34091
	740	0.671281	0.365022	1.78747	1.08011	0.410913	0.465319	-0.146562	0.292559
	742	1.2097	0.34015	1.98876	1.04919	-0.513303	0.402606	0.553261	0.432708
	744	1.2357	0.258697	1.82077	1.1218	-0.365138	0.570577	0.128239	0.439793
	746	1.28787	0.262441	0.867472	0.687754	-0.501459	0.543942	0.0568053	0.510358
	748	1.25395	0.27793	1.10369	0.617639	-0.0969405	0.449544	-0.114337	0.535684
	750	0.626557	0.26327	0.763128	0.685683	0.0483444	0.344605	0.0806816	0.500694
	752	0.867295	0.249285	0.414171	0.694136	-0.11978	0.403973	-0.352757	0.568485
	754	0.680912	0.274356	0.030933	0.526263	0.578245	0.518196	-0.567251	0.625953
	756	0.305166	0.318938	-0.00514964	0.45048	0.813158	0.482433	-0.620549	0.606068
	758	-0.00404625	0.293933	0.424919	0.523033	0.893609	0.296226	-0.463527	0.628723
	760	0.272102	0.288664	0.604989	0.498239	0.455411	0.31034	-0.497195	0.512269
	762	0.247375	0.431125	0.208468	0.396204	0.459157	0.314805	-0.726766	0.364311
	764	0.296425	0.62643	0.0138184	0.452408	0.272172	0.353874	-0.255141	0.368453
	766	0.743708	0.428772	-0.0823529	0.25664	0.32386	0.369958	-0.469894	0.349151
	768	0.851826	0.315912	-0.0078226	0.427867	-0.64438	0.372505	-0.0936033	0.43084
	770	0.594411	0.425991	0.333623	0.551501	-0.574238	0.359563	-0.278527	0.292185
	772	0.217557	0.276147	0.140517	0.490665	-0.591903	0.338754	-0.450074	0.224752
	774	0.143559	0.28923	0.314743	0.513155	-0.689897	0.363897	-0.197442	0.34404
	776	0.634222	0.28228	0.791984	0.980054	-0.892906	0.262547	-0.0818433	0.330434
	778	0.552682	0.27099	1.19067	0.75837	0.334507	0.40714	-0.0383404	0.582363
	780	0.721146	0.249488	0.143345	0.857549	0.763217	0.711214	0.02642	0.573598
	782	1.06816	0.311058	0.352966	0.280135	0.677601	0.729382	-0.112882	0.497649
	784	0.906409	0.304861	0.949276	1.08198	0.587185	0.256107	-0.125057	0.354357
	786	0.930556	0.432624	1.02047	1.15645	0.725326	0.321888	0.790643	0.648069
	788	0.656283	0.649278	0.9367	1.05719	0.701196	0.347964	0.529856	0.707202
	790	0.249516	0.39591	0.646246	0.303366	0.391822	0.402152	0.13613	0.707745
	792	0.332817	0.523404	0.728492	0.711902	-0.0652299	0.625541	-0.23594	0.627059
	794	0.165089	0.47219	0.395504	0.410816	0.197809	0.362109	0.259628	0.716626
	796	-0.0578485	0.321285	-0.277073	0.573897	0.146481	0.420772	0.406159	0.389133
	798	0.289476	0.375878	-0.123865	0.62071	0.131986	0.301732	0.327089	0.525768
	800	0.361215	0.315465	-0.188275	0.351692	0.77414	0.550497	0.107462	0.575598
	802	0.0444017	0.339785	-1.61408	0.872245	1.18612	0.544131	0.226376	0.613765
	804	0.134396	0.447887	-1.02632	0.806457	0.785967	0.475378	0.0256942	0.617069
	806	0.640407	0.415584	-1.37406	0.758233	0.827583	0.517677	-0.0294565	0.621981
	808	0.707396	0.198732	-1.29934	0.623873	0.6943	0.598869	0.61375	0.449135
	810	0.663137	0.385909	-1.08788	0.659614	0.426313	0.467828	0.796712	0.498924
	812	0.866629	0.362879	-0.931784	0.710885	0.307282	0.462182	0.730523	0.381667
	814	0.886762	0.342016	0.136842	0.283412	0.243049	0.37506	-0.111408	0.314946
	816	0.648431	0.391713	0.546828	0.513421	0.857503	0.253216	-0.475514	0.301589
	818	0.446598	0.395339	0.455305	0.384156	0.773369	0.233349	-0.406419	0.192535
	820	0.590642	0.364742	0.770186	0.542468	0.651814	0.263198	-0.453781	0.304997
	822	0.253786	0.473007	0.813626	0.538561	1.08489	0.521296	-0.486491	0.400993
	824	0.159407	0.494357	0.468446	0.47036	1.44912	0.57962	-0.100173	0.279862
	826	-0.0421621	0.276699	-0.0434169	0.785835	1.39464	0.582052	-0.0112436	0.369077
	828	-0.115392	0.267017	0.35541	1.07128	1.73852	0.535583	0.204604	0.320303
	830	0.201021	0.324518	0.157096	1.03794	1.42386	0.628943	0.136765	0.30438
	832	0.36646	0.392961	-0.0381952	0.968937	1.44958	0.596631	-0.0782584	0.456783
	834	0.366315	0.412614	0.190785	0.38123	1.13815	0.626058	0.332907	0.422023
	836	0.652929	0.37397	-0.0446332	0.51746	1.18872	0.507746	0.249768	0.408515
	838	0.981145	0.407362	-0.0610856	0.6185	0.917339	0.463606	0.209459	0.55306
	840	0.579112	0.367545	0.25914	0.918576	0.908948	0.268656	0.145995	0.419773
	842	0.353577	0.464828	0.0256775	0.555967	0.560835	0.268727	-0.26978	0.370533
	844	0.546901	0.567153	0.520811	0.429509	0.11743	0.411642	0.405667	0.264307
	846	0.541369	0.382412	0.599052	0.415633	0.27721	0.560829	0.460663	0.258344
	848	0.692637	0.408965	0.144494	0.669465	0.162138	0.466398	0.195859	0.425209
	850	0.606748	0.262016	-0.67554	0.360123	0.426611	0.437939	0.999731	0.513427
	852	0.466498	0.37772	-0.732561	0.356362	0.595126	0.479455	0.794406	0.571642
	854	0.157457	0.225888	-0.846944	0.425491	0.825328	0.428801	0.75173	0.658993
	856	-0.54996	0.420016	-0.861022	0.551371	0.569325	0.349452	0.659037	0.57217
	858	-0.508692	0.354798	-0.655019	0.420804	0.783675	0.459678	0.245393	0.642371
	860	-0.777516	0.627403	0.232392	0.373341	0.499315	0.372827	0.376217	0.314267
	862	-0.61009	0.428912	0.209898	0.663968	0.758937	0.367197	0.0522016	0.298166
	864	-0.187325	0.568469	-0.28649	0.383236	0.625613	0.393498	0.0853166	0.324623
	866	0.139576	0.401604	-0.526502	0.55076	0.661797	0.50182	0.0519252	0.39017
	868	0.538805	0.364966	-0.762858	0.492686	0.791893	0.280364	-0.170013	0.336927
	870	0.418144	0.305797	-0.712759	0.511672	0.987811	0.48069	0.4069	0.441008
	872	0.819548	0.286225	-0.870456	0.830845	0.81147	0.398571	0.553048	0.593629
	874	0.283957	0.27772	0.0701631	0.482062	1.02038	0.404306	0.3354	0.536657
	876	0.187703	0.336515	0.200576	0.267085	1.21325	0.331244	0.380892	0.456268
	878	0.149933	0.401758	0.523327	0.51505	1.12061	0.399513	0.595135	0.46453
	880	0.291188	0.387405	0.650415	0.461431	0.470323	0.262996	0.799906	0.485605
	882	0.302626	0.346498	0.727902	0.518569	0.723344	0.615948	0.67582	0.526965
	884	0.463094	0.257643	0.712911	0.632301	0.763261	0.453196	0.48354	0.562451
	886	0.525126	0.401518	0.914157	0.593921	0.500603	0.38173	0.564333	0.5252
	888	0.506176	0.481563	-0.143491	0.544453	0.578116	0.434346	-0.0709941	0.61506
	890	0.166216	0.430209	-0.469985	0.701023	0.555262	0.444305	-0.0949887	0.418103
	892	0.226962	0.244756	-1.65364	0.577443	0.20759	0.390055	-0.682884	0.479448
	894	-0.0170981	0.354595	-1.81456	0.544773	-0.197773	0.241735	-0.600138	0.448639
	896	-0.273375	0.323198	-2.02232	0.61596	0.0183878	0.263867	-0.221459	0.525208
	898	0.0211774	0.331121	-1.45123	0.581924	-0.296029	0.291538	0.151185	0.484494
	900	0.617305	0.481288	-1.31663	0.502008	0.248701	0.315826	0.00816948	0.456721
	902	0.608834	0.387023	-0.674545	0.495597	0.734047	0.2939	0.104125	0.582269
	904	1.0145	0.582783	0.323252	1.1729	0.163196	0.58997	0.256034	0.500799
	906	1.52281	0.535277	-1.22721	0.91322	-0.0689256	0.557124	0.45382	0.6286
	908	1.00977	0.474653	-1.81162	0.565185	0.133859	0.570058	0.162133	0.850294
	910	0.44835	0.386436	0.0786341	1.04089	0.12497	0.563078	-0.0802386	0.723194
	912	0.506431	0.252508	-1.19968	0.490661	0.180011	0.401584	-0.0469619	0.663732
	914	0.291736	0.278876	-0.860325	0.670158	0.261224	0.540546	0.124718	0.752558
	916	0.544006	0.241062	-0.604736	0.632451	0.2894	0.525133	0.149894	0.604855
	918	0.405443	0.362847	-0.394382	0.925922	0.247837	0.387011	0.172373	0.475014
	920	0.308226	0.348092	-0.813544	0.702167	0.0290065	0.290551	0.341799	0.526775
	922	0.128886	0.523981	-0.804449	0.492034	0.195531	0.322889	0.452265	0.443193
	924	0.0234405	0.384918	-0.934491	0.438734	-0.0706183	0.431941	0.124278	0.451112
	926	-0.0490087	0.544063	-0.493166	0.324526	0.436116	0.713227	-0.203858	0.562887
	928	-0.580036	0.438419	-0.408408	0.356945	0.66705	0.69331	-0.2725	0.613271
	930	-0.77453	0.66465	-0.277736	0.554838	0.726584	0.718704	-0.569007	0.684107
	932	-0.900041	0.60016	-0.0846143	0.642323	0.526651	0.44593	-0.658821	0.588911
	934	-0.666881	0.694554	0.510002	0.721288	0.368223	0.494328	-0.800123	0.637683
	936	-0.185457	0.665338	0.321776	0.719185	0.545167	0.352255	-0.290312	0.54143
	938	-0.01829	0.477162	-0.113171	0.345958	0.620725	0.681305	-0.417282	0.547028
	940	0.352195	0.54849	-0.555709	0.414024	0.76925	0.69448	-0.0575162	0.533185
	942	0.804866	0.496622	-0.829453	0.600558	0.691166	0.598627	-0.256414	0.473183
	944	0.588258	0.51455	-0.926972	0.415643	0.433049	0.414208	-0.288519	0.533023
	946	0.384373	0.406466	-0.276422	0.42681	0.464658	0.254551	-0.378865	0.52742
	948	0.471769	0.440814	0.420078	0.466696	0.399819	0.247325	0.161932	0.421041
	950	0.312563	0.358831	0.212304	0.422228	0.320715	0.172508	-0.287162	0.362523
	952	0.356509	0.190627	0.421011	0.360479	0.0327841	0.252118	-0.328522	0.268346
	954	1.34701	0.400966	1.14944	0.538148	0.21893	0.196259	0.412575	0.311937
	956	0.0609921	0.482429	-0.497888	0.368578	-1.00211	0.210869	-0.370237	0.339008
	958	-1.9332	0.723903	-2.58817	0.995186	-2.41126	0.503906	-2.87043	0.776133

## Sheet: Fig.5c
	Time traces						Post-training PKCδ activity
		Control (unpaired)		5x spaced			Control (unpaired)	5x spaced
	Time (s)	Mean	SEM	Mean	SEM		0.986654	1.02468
	0	-2.51524	0.901259	-0.744002	0.785461		1.00526	1.04444
	2	-1.87002	0.991962	0.614626	1.03091		0.963339	1.02121
	4	-1.48771	1.01928	1.08603	0.910174		1.02543	1.02686
	6	-1.59081	0.871808	0.971507	0.73538		0.991744	1.05769
	8	-1.80092	0.877678	1.22367	0.704554		1.00603	1.02043
	10	-1.67316	1.10894	1.28552	0.586172		1.02154	1.00657
	12	-1.91246	1.01614	0.988503	0.66353			1.02963
	14	-1.88301	0.88454	0.873646	0.702198
	16	-1.96201	0.942582	0.92977	0.687811
	18	-2.11516	0.812054	0.601322	0.632365
	20	-2.1357	0.80974	0.614069	0.615844
	22	-1.92847	0.68829	0.755188	0.675859
	24	-2.11138	0.909267	0.680621	0.661616
	26	-2.17791	1.05276	0.731163	0.675255
	28	-2.12797	0.985506	0.925669	0.692702
	30	-1.98614	0.741267	0.848141	0.662193
	32	-1.98692	0.944401	0.98879	0.651438
	34	-1.92523	0.877173	0.887418	0.686236
	36	-1.84877	0.763635	0.486769	0.841367
	38	-1.5324	0.583304	0.472401	0.810539
	40	-1.43052	0.611009	0.363644	0.85484
	42	-1.21482	0.684684	0.162828	0.62361
	44	-1.50287	0.639485	0.327971	0.745903
	46	-1.77644	0.715724	0.90122	0.573525
	48	-1.7156	0.701753	0.804037	0.524098
	50	-2.23731	0.620154	1.11017	0.448422
	52	-2.60154	0.483584	1.34444	0.539938
	54	-1.98198	0.594891	1.23435	0.428124
	56	-2.04758	0.604638	1.12532	0.475904
	58	-1.68665	0.83135	1.10347	0.473315
	60	-1.43726	0.827997	1.10083	0.612968
	62	-1.63705	0.915986	1.04849	0.539154
	64	-1.69273	0.893281	0.971085	0.539547
	66	-1.68747	0.933811	0.719796	0.40942
	68	-2.13254	0.7004	0.479666	0.499694
	70	-2.27754	1.01617	0.319159	0.478437
	72	-2.33982	1.05813	0.436195	0.452655
	74	-1.98232	0.995622	0.551207	0.557951
	76	-1.95601	1.13784	0.592173	0.444479
	78	-2.40476	0.890278	1.00033	0.449395
	80	-2.31064	0.820554	1.04927	0.38541
	82	-2.1878	0.792241	0.889772	0.416994
	84	-2.39259	0.724597	0.649849	0.315429
	86	-2.3565	0.691556	0.931715	0.405264
	88	-2.20828	0.576991	0.925411	0.392331
	90	-2.37191	0.604676	0.784677	0.492305
	92	-2.50986	0.649806	0.868517	0.542211
	94	-2.51197	0.711773	1.07828	0.567466
	96	-2.4424	0.792181	1.62574	0.621616
	98	-2.61924	0.809487	1.52156	0.55325
	100	-2.56063	0.93884	1.02141	0.482852
	102	-2.38995	0.917335	1.0886	0.421965
	104	-2.37083	0.895784	0.736112	0.547307
	106	-2.40943	0.922765	0.396535	0.552389
	108	-2.17232	1.00551	0.381788	0.56954
	110	-1.95892	1.11094	0.488874	0.739433
	112	-1.4149	0.993214	0.421361	0.581603
	114	-1.3576	1.05369	0.710058	0.722097
	116	-0.934857	0.96438	1.56156	1.03952
	118	-0.568394	0.913359	1.96342	1.00116
	120	-1.18849	1.0362	1.66935	0.733325
	122	-1.22569	1.05272	1.74397	0.916013
	124	-0.971995	0.860677	1.3422	0.723634
	126	-0.822389	0.868239	1.15451	0.756107
	128	-0.934888	0.845374	1.35192	0.764837
	130	-0.959151	0.651331	1.43837	0.752484
	132	-1.06615	0.753661	1.56105	0.665072
	134	-0.866166	0.750224	1.20192	0.7386
	136	-0.907586	0.707333	0.93097	0.711802
	138	-0.912039	0.715955	1.14065	0.61615
	140	-0.9271	0.685024	0.980909	0.483654
	142	-0.881764	0.640218	0.823875	0.573723
	144	-0.979026	0.583532	0.539289	0.642911
	146	-0.555965	0.548741	0.735786	0.596093
	148	-0.457559	0.502427	0.510936	0.539503
	150	-0.4258	0.532171	0.942723	0.717097
	152	-0.460975	0.512494	1.06497	0.732211
	154	-0.459328	0.538174	1.30249	0.654765
	156	-0.920113	0.468811	1.06257	0.731112
	158	-0.932803	0.518899	1.14197	0.73721
	160	-0.997059	0.456775	1.16437	0.630206
	162	-0.525305	0.388432	0.886018	0.658495
	164	-0.202357	0.405806	0.651036	0.497896
	166	-0.167989	0.521328	1.0164	0.457357
	168	0.426707	0.785968	0.908727	0.384854
	170	0.145414	0.888464	0.692741	0.454422
	172	-0.0383469	0.993539	1.11771	0.471349
	174	-0.155638	0.938222	1.12101	0.611161
	176	-0.00725459	0.907891	0.942776	0.654324
	178	-0.38864	0.628759	0.95904	0.644516
	180	0.0116864	0.673671	0.76942	0.475413
	182	0.0501821	0.66233	0.906028	0.318168
	184	-0.7545	0.467845	0.947718	0.26343
	186	-0.596693	0.510738	0.620985	0.428232
	188	-0.468054	0.533264	0.667773	0.212379
	190	-0.420583	0.576873	0.279157	0.349264
	192	-0.571266	0.686618	0.29051	0.438703
	194	-0.511196	0.734231	0.516061	0.533127
	196	-0.588112	0.738856	0.501164	0.375299
	198	-0.265925	0.688859	0.539902	0.399423
	200	-0.504671	0.725157	0.771093	0.345969
	202	-0.339999	0.63628	0.605546	0.438298
	204	-0.431704	0.694974	0.794934	0.362382
	206	-0.32698	0.6602	0.770386	0.373411
	208	-0.445963	0.699783	1.06254	0.33009
	210	-0.355938	0.601776	0.936887	0.379223
	212	-0.0939848	0.654627	0.960492	0.330413
	214	0.0508234	0.643286	0.779629	0.307251
	216	0.158241	0.576774	0.500952	0.216312
	218	-0.38199	0.546041	0.648556	0.404897
	220	-0.886981	0.53578	1.03609	0.298707
	222	-0.964539	0.586534	1.01591	0.287831
	224	-1.01998	0.661303	0.843903	0.395525
	226	-0.882764	0.621676	1.01192	0.424669
	228	-0.808314	0.58453	1.10435	0.50978
	230	-0.272945	0.701401	0.987668	0.513108
	232	-0.0369671	0.560494	0.743179	0.446677
	234	-0.392707	0.48421	0.904545	0.431578
	236	-0.331727	0.470037	0.8424	0.353916
	238	-0.173592	0.499693	0.905806	0.447294
	240	-0.238154	0.537694	0.854768	0.490128
	242	-0.0943103	0.481953	0.654591	0.500519
	244	0.184965	0.463109	0.497068	0.56253
	246	0.411266	0.501354	0.260928	0.522111
	248	0.391019	0.443911	0.275556	0.492724
	250	-0.0130923	0.261622	-0.187809	0.394795
	252	-0.295972	0.518441	-0.0441223	0.34075
	254	-0.166761	0.385357	-0.101895	0.366656
	256	-0.208067	0.433899	0.435613	0.273631
	258	-0.575798	0.591181	0.538097	0.278494
	260	-0.136287	0.604139	0.572541	0.378111
	262	-0.103225	0.648049	0.918435	0.468264
	264	0.0375427	0.560297	1.26645	0.512264
	266	0.154441	0.637428	1.29735	0.572245
	268	0.511306	0.536974	1.28052	0.550965
	270	0.516527	0.652624	1.5028	0.400498
	272	0.556935	0.564297	1.14554	0.359209
	274	0.569025	0.541452	0.786613	0.446445
	276	0.330203	0.624495	1.02595	0.311268
	278	0.0523702	0.687426	0.538721	0.203638
	280	-0.0299791	0.504089	0.37479	0.363297
	282	-0.103813	0.525	0.485437	0.4395
	284	-0.291255	0.579215	0.558551	0.36432
	286	-0.282425	0.449395	0.930611	0.415972
	288	-0.0152074	0.275776	0.76361	0.349716
	290	-0.0706962	0.292495	0.77974	0.457502
	292	-0.164637	0.235374	0.663419	0.362113
	294	-0.37768	0.505165	0.895539	0.360987
	296	-0.346797	0.642683	0.911175	0.303449
	298	-0.122352	0.543722	0.90562	0.305731
	300	0.241213	0.541468	0.693635	0.301635
	302	0.222601	0.489574	0.496884	0.255609
	304	0.387116	0.358506	0.339164	0.371112
	306	0.431201	0.342578	0.0655169	0.351883
	308	0.0555321	0.265458	0.0562587	0.274039
	310	-0.0394007	0.446717	0.367985	0.235007
	312	0.213628	0.339497	0.421739	0.289871
	314	-0.273937	0.432873	0.234014	0.301699
	316	0.206916	0.525926	0.342643	0.333811
	318	0.0422323	0.569249	0.417515	0.376241
	320	0.174843	0.579239	0.29219	0.395419
	322	-0.088703	0.595994	0.375118	0.334897
	324	-0.181207	0.632272	0.377872	0.326083
	326	-0.310484	0.556595	0.315238	0.381296
	328	-0.296806	0.408034	0.143029	0.352815
	330	-0.0997582	0.354278	0.406862	0.416537
	332	0.00885008	0.299535	0.669008	0.398438
	334	-0.206101	0.276998	0.365739	0.255113
	336	-0.0770148	0.231972	0.146622	0.180104
	338	-0.291379	0.237345	0.452493	0.118523
	340	-0.144188	0.297309	0.506797	0.185412
	342	-0.396342	0.350992	0.765666	0.199365
	344	0.104482	0.3289	1.01947	0.157381
	346	-0.119366	0.39563	1.26132	0.13245
	348	0.172567	0.503805	1.0161	0.314733
	350	-0.49311	0.35847	0.873994	0.348394
	352	-0.0638465	0.540025	0.364753	0.526173
	354	-0.253996	0.382803	0.607989	0.456036
	356	-0.623002	0.428976	0.105642	0.430685
	358	-0.597655	0.501073	0.382338	0.386547
	360	-0.729396	0.468525	0.0711583	0.413415
	362	-0.509993	0.37672	0.418118	0.423178
	364	-0.509482	0.489767	0.697223	0.30999
	366	-0.493165	0.388673	0.995098	0.319335
	368	-0.548792	0.234099	0.773029	0.347337
	370	-0.245874	0.35029	0.881536	0.315533
	372	-0.216738	0.386156	0.589814	0.364274
	374	-0.126854	0.461586	0.755834	0.273463
	376	-0.0174812	0.462688	0.575446	0.375023
	378	-0.280789	0.528809	0.398144	0.395379
	380	-0.138541	0.374508	0.332629	0.366061
	382	0.0642378	0.235091	0.40121	0.388556
	384	-0.351393	0.311757	0.136775	0.376594
	386	-0.497978	0.359042	0.18387	0.315504
	388	-0.327212	0.288056	0.33403	0.365716
	390	-0.312361	0.414089	0.294586	0.12896
	392	-0.192395	0.358942	0.340103	0.328528
	394	0.0422978	0.488849	0.260258	0.29746
	396	-0.253398	0.373491	-0.00350099	0.3873
	398	-0.723893	0.453393	0.241676	0.427166
	400	-0.463044	0.336592	-0.0813498	0.310544
	402	-0.743407	0.453485	0.142265	0.220267
	404	-0.68878	0.4282	0.240403	0.291661
	406	-0.491914	0.375071	0.40955	0.26186
	408	-0.149748	0.38187	0.417377	0.318903
	410	0.00877573	0.400698	0.341457	0.331554
	412	0.499458	0.343866	0.641583	0.408811
	414	0.498602	0.340405	0.253091	0.40757
	416	0.146496	0.372287	0.725903	0.37736
	418	-0.0652283	0.540796	0.287894	0.322407
	420	0.170697	0.48886	0.188805	0.270609
	422	-0.173727	0.288049	0.000380643	0.237369
	424	-0.177042	0.209974	0.168976	0.278563
	426	-0.23002	0.224193	0.0267039	0.195949
	428	0.217651	0.464539	0.315639	0.278664
	430	0.218011	0.187057	0.25986	0.254068
	432	0.162475	0.18911	0.759138	0.323941
	434	0.265153	0.165328	0.420406	0.280059
	436	0.207444	0.288913	0.203409	0.222636
	438	0.45314	0.127141	-0.108822	0.282044
	440	0.274144	0.307306	0.103362	0.302429
	442	0.286853	0.317321	0.0254356	0.331806
	444	0.391768	0.2342	0.209824	0.334526
	446	0.60039	0.232701	0.149834	0.3419
	448	0.214618	0.331491	0.101012	0.336783
	450	0.165978	0.314081	0.277906	0.373303
	452	0.207295	0.356968	0.3466	0.289277
	454	-0.000583519	0.23445	0.29438	0.450687
	456	-0.0255278	0.266088	0.409751	0.3859
	458	-0.302419	0.2826	0.602614	0.391712
	460	-0.164303	0.26608	0.438859	0.382515
	462	0.192721	0.272881	0.13202	0.312279
	464	-0.0952237	0.155311	0.105128	0.295437
	466	-0.057846	0.208484	0.22314	0.235512
	468	0.135855	0.275035	0.165214	0.170374
	470	-0.0720971	0.155748	0.3316	0.148192
	472	-0.182828	0.141671	0.763898	0.251253
	474	-0.120507	0.274302	0.492393	0.200537
	476	0.0201103	0.363059	0.587506	0.359658
	478	0.239951	0.487839	0.577632	0.411335
	480	0.325797	0.518629	0.443832	0.232962
	482	0.252756	0.470718	0.396244	0.295688
	484	0.538234	0.43981	0.366308	0.274793
	486	0.326726	0.337748	0.399104	0.286324
	488	0.523174	0.30934	0.167892	0.233524
	490	0.380261	0.321549	0.346605	0.244337
	492	0.0931002	0.207138	0.379355	0.297547
	494	0.177943	0.196607	0.859151	0.2872
	496	0.120323	0.217157	0.614332	0.296455
	498	-0.033675	0.15698	0.708917	0.291129
	500	0.146929	0.232766	0.450196	0.25015
	502	0.0945862	0.179332	0.242056	0.197794
	504	-0.0765324	0.247259	-0.277583	0.0898224
	506	-0.129876	0.38938	0.0639928	0.0959007
	508	0.0118401	0.369628	-0.00971737	0.149924
	510	-0.0814931	0.254459	0.167935	0.146569
	512	0.167867	0.398905	0.0186259	0.122656
	514	-0.148946	0.378333	0.022205	0.243528
	516	0.301687	0.246698	0.0347978	0.219879
	518	0.295753	0.169988	0.0953184	0.265518
	520	0.255029	0.184631	0.260816	0.358415
	522	0.254264	0.320437	0.47294	0.332822
	524	0.0670421	0.385723	0.805374	0.26287
	526	0.0882027	0.286943	0.874253	0.320784
	528	0.113548	0.393743	0.920396	0.35511
	530	0.450135	0.495673	0.629274	0.418161
	532	0.41928	0.474413	0.562717	0.442846
	534	0.631518	0.413411	0.244596	0.322381
	536	0.557261	0.321398	0.405635	0.253139
	538	0.324395	0.394267	0.420957	0.235425
	540	0.0637576	0.285774	0.426191	0.288057
	542	0.184085	0.404117	0.50104	0.217953
	544	0.107095	0.547295	0.613163	0.167905
	546	0.0656531	0.463761	0.3175	0.19297
	548	0.152664	0.471851	0.103028	0.178441
	550	0.257741	0.34874	0.297749	0.317058
	552	0.29116	0.378738	0.229129	0.295018
	554	-0.0285429	0.282723	-0.119362	0.26575
	556	0.211398	0.328929	0.154735	0.299606
	558	-0.0120451	0.292856	0.232156	0.331698
	560	-0.134253	0.401068	0.348541	0.298123
	562	-0.487064	0.386159	-0.0501469	0.285954
	564	-0.229204	0.4834	0.31415	0.264251
	566	-0.000467019	0.434143	0.402025	0.180489
	568	0.15128	0.378073	0.93238	0.257525
	570	0.432959	0.328019	0.237692	0.247932
	572	0.472196	0.322155	0.669077	0.343404
	574	0.198883	0.133483	0.307089	0.464574
	576	0.4749	0.271623	0.136038	0.479674
	578	0.318327	0.214172	-0.248773	0.32979
	580	0.467673	0.29501	0.143347	0.422927
	582	0.293549	0.253139	0.142989	0.287327
	584	0.309531	0.272727	0.33203	0.36622
	586	0.283345	0.36841	-0.0584339	0.222254
	588	0.404413	0.3082	0.404545	0.336295
	590	0.579546	0.301399	0.564734	0.278941
	592	0.679361	0.603421	0.168663	0.407714
	594	0.63067	0.382573	0.17234	0.26232
	596	0.527735	0.340226	0.594709	0.29838
	598	0.531902	0.340634	0.274731	0.249132
	600	0.0651254	0.163068	-0.0288208	0.280468
	602	-0.145906	0.245949	-0.114313	0.265039
	604	-0.0325047	0.191586	-0.203094	0.243711
	606	-0.143254	0.269062	-0.081478	0.181986
	608	0.0170688	0.352763	-0.0973504	0.200673
	610	0.0578825	0.223151	0.0467886	0.381308
	612	0.0995839	0.20719	-0.305044	0.198342
	614	0.262214	0.244167	-0.0411237	0.287815
	616	0.349875	0.44984	0.279723	0.385247
	618	-0.0809477	0.486563	0.208414	0.307248
	620	0.222635	0.513298	0.0418689	0.289025
	622	0.0448103	0.487182	0.459881	0.309769
	624	-0.286959	0.272169	0.167448	0.249844
	626	-0.0585474	0.12294	0.0669847	0.183725
	628	0.30033	0.31917	0.327285	0.16707
	630	0.0261022	0.188356	0.16331	0.278226
	632	-0.0126326	0.229358	0.0142051	0.326505
	634	-0.0448756	0.11766	0.0689803	0.24418
	636	-0.110269	0.17832	0.0382508	0.340351
	638	-0.32671	0.187531	0.182571	0.279622
	640	-0.356722	0.16381	0.473089	0.221248
	642	0.0395632	0.238763	0.52114	0.210345
	644	-0.0870476	0.320732	0.585275	0.293277
	646	0.0813486	0.260361	0.448827	0.356315
	648	0.191092	0.279277	0.422652	0.310967
	650	0.329912	0.376612	0.55156	0.27343
	652	-0.0757692	0.187889	0.426248	0.250174
	654	-0.0273808	0.273101	0.215544	0.140413
	656	-0.404226	0.382133	0.241765	0.189237
	658	-0.347314	0.381258	0.385099	0.179891
	660	-0.0666601	0.273751	0.155803	0.239274
	662	0.0285365	0.176675	0.182547	0.213999
	664	-0.221712	0.270291	0.333036	0.194364
	666	-0.0502473	0.3112	0.129928	0.120794
	668	-0.0890588	0.280804	-0.234146	0.214067
	670	0.0675365	0.240492	-0.063536	0.367823
	672	-0.126423	0.324833	0.237278	0.334421
	674	-0.0976792	0.245632	0.331377	0.302321
	676	-0.391537	0.301058	0.231287	0.26568
	678	-0.375393	0.289642	0.394914	0.242013
	680	-0.582514	0.309684	0.153421	0.249851
	682	-0.522276	0.316758	-0.322404	0.181336
	684	-0.336313	0.377936	-0.261775	0.214252
	686	-0.267794	0.367351	-0.214484	0.338244
	688	0.102968	0.358692	-0.125996	0.384816
	690	0.0922011	0.262308	-0.0916243	0.321064
	692	0.228156	0.292412	-0.0134202	0.381894
	694	0.049889	0.151041	-0.0658143	0.379296
	696	0.0961487	0.164093	-0.21446	0.322157
	698	0.337547	0.168679	-0.160732	0.303444
	700	0.33847	0.21757	-0.0878132	0.337019
	702	0.102297	0.220609	-0.0206624	0.294921
	704	-0.0509029	0.208596	-0.122216	0.271875
	706	0.125962	0.285552	-0.0144227	0.345913
	708	-0.00521288	0.364813	0.704264	0.236004
	710	0.400243	0.522282	0.197076	0.181068
	712	0.274731	0.405946	0.437739	0.224929
	714	0.0250432	0.36214	0.414532	0.224167
	716	0.0571219	0.286454	-0.217015	0.671256
	718	-0.047534	0.367892	0.222062	0.351709
	720	-0.0674607	0.341841	0.0568365	0.282977
	722	0.278514	0.247269	-0.200994	0.32926
	724	0.412259	0.321389	-0.319757	0.478608
	726	0.128389	0.170968	0.131438	0.306152
	728	-0.153114	0.302277	0.0797513	0.210362
	730	-0.277692	0.440647	0.155657	0.252188
	732	-0.0776985	0.417931	0.321938	0.230901
	734	0.00367543	0.304589	0.328707	0.382632
	736	0.0689429	0.302581	-0.0222121	0.355746
	738	-0.13761	0.269086	0.083159	0.288351
	740	-0.0942889	0.29971	-0.487662	0.249737
	742	0.0620672	0.154249	-0.551184	0.246332
	744	-0.113278	0.381386	-0.3644	0.275133
	746	0.0980313	0.36918	-0.43073	0.232491
	748	0.117878	0.315226	-0.610078	0.215844
	750	0.0739277	0.427793	-0.189322	0.217652
	752	-0.228394	0.446803	-0.119056	0.306699
	754	-0.0222243	0.437653	-0.267557	0.17318
	756	0.186269	0.41646	-0.19733	0.173045
	758	0.296418	0.361085	-0.26892	0.210642
	760	-0.265616	0.221733	-0.490209	0.278584
	762	-0.239047	0.246558	-0.552304	0.297575
	764	-0.434826	0.246899	-0.401984	0.322837
	766	-0.588409	0.389046	-0.33888	0.398035
	768	-0.0919648	0.309683	-0.164244	0.326982
	770	0.304275	0.282117	0.061596	0.220176
	772	0.321608	0.165242	-0.608272	0.390942
	774	0.388306	0.161942	-0.550395	0.290268
	776	0.419332	0.361835	-0.280895	0.316365
	778	0.171551	0.252088	-0.529571	0.265558
	780	-0.0935934	0.220181	-0.458843	0.169622
	782	-0.242388	0.281251	-0.444973	0.163748
	784	0.0811845	0.21907	-0.302846	0.36595
	786	0.0327554	0.234737	-0.141986	0.260655
	788	0.121935	0.252613	-0.0492253	0.268526
	790	0.200226	0.354571	-0.0115887	0.138655
	792	-0.0635438	0.363346	-0.136517	0.148862
	794	0.667161	0.368297	-0.309814	0.340005
	796	0.758144	0.486433	-0.451597	0.321606
	798	0.582824	0.402497	-0.238442	0.173504
	800	0.223921	0.312632	-0.334251	0.211732
	802	0.0149873	0.384971	-0.270815	0.251524
	804	-0.0593509	0.335419	-0.302912	0.330829
	806	-0.228333	0.232805	-0.282925	0.322547
	808	-0.0866993	0.236723	-0.323502	0.279922
	810	-0.240119	0.232177	-0.259419	0.202724
	812	-0.207177	0.208953	-0.245892	0.281878
	814	-0.288385	0.261141	-0.398545	0.290377
	816	-0.462019	0.323595	-0.248365	0.300506
	818	-0.210408	0.295987	-0.163023	0.256434
	820	-0.23803	0.365329	0.0434851	0.288763
	822	-0.348959	0.429459	-0.104799	0.32237
	824	0.0983748	0.498477	-0.404457	0.409362
	826	-0.139061	0.398875	-0.176973	0.436447
	828	-0.248389	0.391653	-0.218445	0.323288
	830	0.0408003	0.277863	-0.634325	0.322846
	832	0.104189	0.286495	-0.429904	0.293072
	834	0.0265827	0.334699	-0.366704	0.21558
	836	-0.0514236	0.317319	-0.419454	0.207237
	838	-0.140139	0.2932	-0.495214	0.206327
	840	-0.0801729	0.273992	-0.355366	0.217477
	842	0.124382	0.294231	-0.391651	0.28526
	844	0.28877	0.0972035	-0.144279	0.418736
	846	0.198273	0.202751	-0.016629	0.382056
	848	0.378093	0.313255	0.151947	0.371315
	850	0.491653	0.388408	0.0490903	0.467066
	852	0.0161833	0.35732	0.00583699	0.464342
	854	-0.260577	0.327894	0.125012	0.2503
	856	0.16514	0.299189	0.0717847	0.363509
	858	0.267255	0.268641	-0.302392	0.275465
	860	0.544894	0.471821	-0.302612	0.298385
	862	0.532133	0.5571	-0.254113	0.311238
	864	0.65518	0.455101	-0.961711	0.454786
	866	0.204359	0.375138	-0.27443	0.559038
	868	0.217984	0.227592	0.152848	0.468971
	870	-0.194834	0.205764	-0.135135	0.466459
	872	-0.0311527	0.381103	-0.19403	0.383365
	874	0.317765	0.309975	-0.261174	0.276828
	876	0.12527	0.374688	-0.454526	0.263369
	878	-0.367591	0.396959	-0.659091	0.311304
	880	-0.112038	0.210408	-0.651343	0.242933
	882	-0.201573	0.350344	-0.721029	0.31205
	884	0.21536	0.360965	-0.554832	0.294294
	886	-0.21793	0.591555	-0.328235	0.323789
	888	-0.229408	0.647143	-0.293497	0.342563
	890	-0.17783	0.630549	-0.479656	0.324314
	892	0.341372	0.353021	-0.904079	0.164494
	894	-0.41629	0.511526	-0.541082	0.244685
	896	-0.601028	0.432183	-0.49699	0.235615
	898	-0.193758	0.544604	-0.679092	0.237134
	900	-0.580914	0.383315	-0.631501	0.325264
	902	-0.707674	0.407976	-0.448948	0.411656
	904	-0.705877	0.352697	-0.200578	0.34505
	906	-0.715413	0.331493	0.0254098	0.178358
	908	-1.0991	0.572593	0.279992	0.223953
	910	-0.789253	0.475935	0.154513	0.270501
	912	-0.741168	0.51091	0.216535	0.24439
	914	-0.816865	0.475132	0.107156	0.295493
	916	-0.864434	0.488634	-0.244477	0.331854
	918	-1.0752	0.394584	-0.527531	0.338365
	920	-0.911157	0.296845	-0.870906	0.162691
	922	-0.71023	0.325862	-0.646963	0.257548
	924	-0.735903	0.448691	-0.58155	0.165719
	926	-0.588691	0.342139	-0.552202	0.211928
	928	-0.273251	0.220448	-0.459195	0.226141
	930	-0.415937	0.467487	-0.452636	0.244619
	932	-0.323565	0.381828	-0.417839	0.353412
	934	-0.214214	0.344672	-0.615578	0.266058
	936	-0.180284	0.375042	-0.69747	0.255563
	938	-0.0653732	0.410122	-0.578154	0.345774
	940	-0.124891	0.434521	-0.645991	0.315575
	942	-0.211033	0.44078	-0.593372	0.379558
	944	-0.438942	0.455961	-0.601897	0.31858
	946	-0.535563	0.378036	-0.353744	0.365457
	948	-0.508789	0.359369	-0.327612	0.308243
	950	-0.348375	0.335498	-0.330174	0.298351
	952	-0.322303	0.14499	-0.761745	0.310549
	954	-0.248634	0.295284	-0.810125	0.303587
	956	-0.681702	0.331858	-1.23913	0.400033
	958	-2.0164	0.486291	-2.37272	0.505242

## Sheet: Fig.5d
	Time traces						Post-training PKCδ activity
		Control (unpaired)		5x spaced			Control (unpaired)	5x spaced
	Time (s)	Mean	SEM	Mean	SEM		0.999076	0.999128
	0	-3.9856	0.74184	-3.72341	0.493709		0.996746	1.01016
	2	-2.94182	0.634443	-2.82168	0.616142		1.02561	0.992131
	4	-2.48716	0.588069	-2.50994	0.552647		1.0238	1.00809
	6	-2.51037	0.727572	-2.36867	0.537143		0.990932	0.996564
	8	-3.15264	0.617722	-2.19446	0.518441		0.989458	1.02359
	10	-2.96507	0.552894	-2.02959	0.48184		0.998199	1.01326
	12	-2.51591	0.653444	-2.34942	0.430094		0.9823	1.00801
	14	-2.31793	0.612767	-2.44805	0.450203		0.993876
	16	-2.48179	0.693299	-2.46253	0.48374
	18	-2.61276	0.683464	-2.21561	0.427511
	20	-3.19067	0.663387	-1.61791	0.444457
	22	-3.30829	0.64649	-1.73009	0.474974
	24	-3.42027	0.659767	-1.68689	0.460293
	26	-3.24044	0.754346	-1.77296	0.553232
	28	-2.79284	0.729918	-1.87024	0.713644
	30	-2.99828	0.667819	-1.94286	0.64931
	32	-2.96564	0.579203	-1.99826	0.639786
	34	-2.6928	0.72701	-1.89731	0.460502
	36	-3.02826	0.51712	-2.0451	0.451958
	38	-2.89128	0.652632	-2.84519	0.661599
	40	-3.1498	0.509608	-2.97865	0.542803
	42	-3.28925	0.519453	-3.05713	0.507273
	44	-3.45499	0.536259	-2.71467	0.672792
	46	-3.30323	0.548286	-3.19973	0.576529
	48	-3.30993	0.466025	-3.66866	0.483487
	50	-2.89954	0.576221	-3.14733	0.519863
	52	-3.14193	0.699447	-2.66772	0.641577
	54	-3.06839	0.613829	-3.12987	0.552937
	56	-3.17749	0.520351	-1.66676	0.777143
	58	-3.42105	0.482628	-1.70737	0.675945
	60	-3.30176	0.385883	-2.3969	0.600835
	62	-3.22545	0.430049	-2.46228	0.64298
	64	-3.20448	0.450591	-1.71148	0.452558
	66	-3.14205	0.423459	-1.22341	0.381706
	68	-3.27919	0.551277	-1.23532	0.54355
	70	-3.32241	0.490168	-1.15701	0.397571
	72	-3.04685	0.637542	-1.65758	0.386355
	74	-3.01527	0.501228	-1.49844	0.248562
	76	-2.80881	0.534237	-1.82554	0.183726
	78	-2.69473	0.587021	-1.95464	0.240127
	80	-2.90641	0.615679	-1.92826	0.267286
	82	-2.93238	0.636201	-2.28322	0.299607
	84	-2.59858	0.669729	-1.57528	0.392041
	86	-2.63346	0.63181	-1.63149	0.355906
	88	-2.62133	0.644892	-1.68161	0.325706
	90	-2.39106	0.638201	-1.86935	0.287292
	92	-2.61829	0.522012	-1.5903	0.42162
	94	-2.90053	0.488035	-1.87021	0.511141
	96	-2.82432	0.559954	-2.09449	0.580801
	98	-2.80536	0.563908	-2.82795	0.389364
	100	-2.96189	0.602142	-2.53255	0.290392
	102	-2.89299	0.578608	-2.54524	0.29441
	104	-3.25292	0.605748	-2.33617	0.301174
	106	-3.00762	0.52431	-2.35938	0.286518
	108	-3.10199	0.563438	-2.26454	0.366286
	110	-2.6292	0.620388	-2.42913	0.444256
	112	-2.31737	0.529173	-2.21738	0.427898
	114	-2.32983	0.551102	-1.94008	0.453773
	116	-2.37567	0.618527	-1.7875	0.535405
	118	-2.10278	0.550756	-1.28292	0.671125
	120	-2.50788	0.597178	-1.6614	0.557248
	122	-2.64527	0.506865	-1.34896	0.287379
	124	-2.83178	0.378102	-1.31927	0.459175
	126	-2.74111	0.27523	-1.56086	0.536375
	128	-2.52782	0.359577	-1.50116	0.589202
	130	-2.61934	0.360966	-1.77645	0.777405
	132	-2.48151	0.38595	-1.57037	0.862342
	134	-2.45705	0.420297	-1.77387	0.774155
	136	-2.49907	0.537064	-1.95893	0.694912
	138	-3.18381	0.615258	-2.17942	0.627775
	140	-3.51723	0.649267	-1.92282	0.540461
	142	-3.59983	0.66898	-2.0535	0.62746
	144	-3.42064	0.809771	-1.20582	0.515285
	146	-3.16385	0.875261	-0.972467	0.565106
	148	-2.81644	0.826904	-0.960438	0.698952
	150	-2.93368	0.707431	-1.07708	0.488282
	152	-2.64774	0.720339	-0.752693	0.486307
	154	-2.69685	0.727167	-0.781045	0.472662
	156	-2.20303	0.791804	-1.10068	0.363917
	158	-1.96635	0.756501	-0.480996	0.36679
	160	-1.99416	0.845138	-0.332136	0.713202
	162	-2.24707	0.736972	-0.494891	0.799206
	164	-2.46912	0.653629	-0.221048	0.580103
	166	-2.52256	0.621667	-0.140473	0.495232
	168	-2.61437	0.679735	-0.491663	0.547221
	170	-2.84385	0.585677	-0.073342	0.50386
	172	-2.56103	0.772048	-0.0631824	0.564358
	174	-2.52427	0.738959	-0.134826	0.56788
	176	-2.26321	0.695515	-0.200263	0.679893
	178	-2.13842	0.588343	0.165307	0.681873
	180	-2.04949	0.58831	0.251187	0.537098
	182	-1.79571	0.538804	0.243042	0.304219
	184	-1.53066	0.648652	0.374377	0.448353
	186	-1.06341	0.698792	0.230062	0.584786
	188	-1.10578	0.643849	0.329634	0.597103
	190	-0.847558	0.586141	0.113006	0.544874
	192	-0.363931	0.54853	-0.439328	0.755969
	194	-0.36262	0.502459	-0.68624	0.629113
	196	-0.585807	0.527863	-0.903501	0.655935
	198	-0.463998	0.527423	-1.16872	0.54956
	200	-0.624793	0.567675	-1.04139	0.492198
	202	-0.848662	0.661356	-0.353939	0.265196
	204	-0.854955	0.598402	-0.333065	0.342141
	206	-1.00636	0.495172	-0.087569	0.359575
	208	-1.25784	0.648619	0.0171001	0.522468
	210	-1.13082	0.423428	-0.198306	0.736656
	212	-1.18349	0.419348	-0.365873	0.747987
	214	-1.45549	0.492402	0.0934716	0.663535
	216	-1.66328	0.513979	-0.593198	0.49817
	218	-1.39767	0.486467	0.185078	0.76011
	220	-0.864571	0.556217	-0.353538	0.882067
	222	-0.78431	0.557414	-0.245798	0.860296
	224	-0.349716	0.499318	-0.643668	0.745822
	226	-0.195888	0.447712	-0.708952	0.701437
	228	-0.181482	0.269478	-0.642414	0.566197
	230	-0.4275	0.240308	-0.204195	0.511709
	232	-0.245125	0.376944	0.128661	0.466503
	234	-0.551599	0.461784	0.285831	0.437123
	236	-0.908132	0.507784	0.679513	0.45572
	238	-1.02415	0.575273	0.719679	0.428621
	240	-0.750423	0.623336	1.15822	0.344149
	242	-0.427275	0.508665	0.732774	0.355954
	244	-0.550843	0.474625	0.535565	0.445523
	246	-0.414641	0.400942	0.732109	0.409433
	248	-0.276994	0.392673	0.749355	0.543008
	250	-0.517181	0.40333	0.415627	0.555066
	252	-0.66568	0.317147	0.513155	0.518366
	254	-0.827301	0.276746	0.578947	0.503665
	256	-0.371739	0.284121	0.140713	0.431607
	258	-0.20458	0.328787	-0.119733	0.515169
	260	-0.623986	0.335473	-0.357081	0.355065
	262	-0.662297	0.468805	-0.367021	0.539014
	264	-0.490542	0.401033	-0.340273	0.575574
	266	-0.958621	0.282173	-0.336702	0.481988
	268	-0.858524	0.399929	-0.846597	0.940158
	270	-0.505868	0.46738	-0.632634	0.996648
	272	-0.524955	0.514587	-0.259912	1.08025
	274	-0.309136	0.497579	0.109349	0.938075
	276	-0.761095	0.42724	0.657671	0.628607
	278	-0.403644	0.532454	0.596658	0.581073
	280	-0.718463	0.569592	0.313187	0.583678
	282	-0.697951	0.5532	0.136175	0.455218
	284	-0.820625	0.458886	0.629252	0.387366
	286	-0.822422	0.510458	0.440699	0.337469
	288	-0.761415	0.478057	0.232812	0.253201
	290	-0.905678	0.493721	0.642949	0.355051
	292	-1.03079	0.488692	-0.0984075	0.548867
	294	-0.822719	0.549102	0.117918	0.838715
	296	-0.723461	0.562872	0.207929	0.860119
	298	-0.894595	0.446061	0.771546	0.472612
	300	-0.550042	0.520427	0.870654	0.477827
	302	-0.187098	0.269206	1.08015	0.511082
	304	-0.181114	0.411332	1.25016	0.479077
	306	-0.135144	0.320629	0.618067	0.385619
	308	-0.200488	0.371105	0.737639	0.571745
	310	-0.462494	0.475938	0.603112	0.650082
	312	-0.471264	0.595933	0.518751	0.61456
	314	-0.615831	0.520689	0.377336	0.622206
	316	-0.855804	0.641995	0.737449	0.850665
	318	-0.592406	0.574021	0.617925	0.639745
	320	-0.441443	0.430817	0.061123	0.723649
	322	-0.605542	0.406898	0.00478097	0.681124
	324	-0.395409	0.489822	0.143334	0.727525
	326	-0.524434	0.351842	-0.237887	0.594908
	328	-0.829076	0.294586	-0.599315	0.514381
	330	-0.863062	0.211877	-0.0570946	0.466114
	332	-0.862411	0.206587	0.298126	0.538518
	334	-0.487758	0.247348	0.210143	0.509006
	336	-0.26807	0.338677	0.420669	0.62664
	338	-0.234104	0.334268	0.561033	0.494211
	340	-0.363422	0.386916	-0.0400479	0.434285
	342	-0.556179	0.432395	0.0722103	0.413755
	344	-0.63628	0.32905	-0.0744057	0.346903
	346	-0.390721	0.286255	0.568778	0.307813
	348	-0.484882	0.35709	0.713299	0.690178
	350	0.0919948	0.362881	0.849805	0.703376
	352	0.311	0.371897	0.154964	0.749696
	354	-0.252776	0.289252	0.462225	0.86145
	356	-0.325834	0.383114	0.427747	0.905215
	358	-0.653109	0.337368	0.591389	0.81066
	360	-0.945977	0.317201	0.592677	0.747636
	362	-0.926791	0.341115	0.25849	0.793865
	364	-1.25213	0.287788	-0.0305305	0.739568
	366	-1.20573	0.374922	0.120263	0.740203
	368	-1.35971	0.442966	-0.648613	0.693227
	370	-1.6531	0.339117	-0.13697	0.836932
	372	-1.40822	0.377913	0.123725	0.799961
	374	-1.13172	0.383049	0.441663	0.644866
	376	-0.881932	0.376989	-0.157839	0.732636
	378	-0.685064	0.345767	0.467352	0.613755
	380	-0.793218	0.362255	0.786855	0.599975
	382	-1.00201	0.277767	0.815562	0.608726
	384	-0.679355	0.479793	0.451429	0.527874
	386	-0.471405	0.383097	0.2519	0.390013
	388	-0.685336	0.347084	0.231719	0.334404
	390	-0.662002	0.300144	-0.52341	0.579175
	392	0.0443837	0.483513	-0.654538	0.607148
	394	-0.299066	0.37929	0.146048	0.544037
	396	-0.329952	0.343356	0.00955366	0.687803
	398	-0.311899	0.390129	0.203095	0.766669
	400	-0.514627	0.455006	0.772598	0.556793
	402	-0.384133	0.44501	0.854752	0.579201
	404	-0.804795	0.572339	0.160118	0.470372
	406	-0.896707	0.506482	0.612265	0.382676
	408	-0.777579	0.457497	0.682257	0.560007
	410	-0.605373	0.394918	0.646616	0.529548
	412	-1.07168	0.343555	0.811928	0.597226
	414	-0.970667	0.329403	0.859949	0.559352
	416	-1.37395	0.28629	0.878025	0.560132
	418	-1.17682	0.250855	0.619668	0.562667
	420	-1.40087	0.263782	0.473113	0.413702
	422	-1.15048	0.3477	-0.211759	0.597402
	424	-0.93735	0.398718	-0.117286	0.53725
	426	-0.607067	0.440243	-0.264372	0.422383
	428	-0.972469	0.377446	0.301251	0.398193
	430	-0.846623	0.445239	-0.0412551	0.271858
	432	-0.524803	0.312134	-0.0134575	0.215942
	434	-0.534693	0.37224	0.16346	0.202093
	436	-0.553183	0.343765	-0.237558	0.577968
	438	-0.516834	0.219265	-0.481125	0.48919
	440	-0.507708	0.32328	-0.569179	0.564895
	442	-0.96715	0.413767	-0.54172	0.461618
	444	-0.522508	0.347182	-0.324121	0.438627
	446	-0.476232	0.307552	-0.119422	0.347108
	448	-0.197671	0.31105	-0.0609382	0.320415
	450	-0.832222	0.350528	0.920851	0.599403
	452	-0.447226	0.275317	1.08394	0.515518
	454	-0.28885	0.256795	-0.184784	0.506774
	456	-0.0128573	0.306306	-0.279381	0.685723
	458	-0.0790703	0.308907	0.149891	0.559173
	460	0.24168	0.33909	-0.0107563	0.704202
	462	0.178541	0.277708	0.135517	0.768478
	464	-0.0512334	0.281404	-0.0083731	0.742832
	466	-0.0143318	0.251839	-0.500963	0.598831
	468	0.0418195	0.321533	-0.278124	0.702826
	470	-0.235677	0.433131	-0.555081	0.58282
	472	-0.0351253	0.327954	-0.449392	0.567974
	474	-0.172349	0.348233	0.139364	0.647691
	476	-0.398421	0.388567	-0.271666	0.54434
	478	-0.697689	0.377556	0.0674007	0.360309
	480	-0.534778	0.361017	0.651776	0.278716
	482	-0.867708	0.34887	-0.819841	0.681892
	484	-0.557285	0.588234	-0.383765	0.555245
	486	-0.497079	0.470971	-0.414801	0.542172
	488	-0.413594	0.492251	-0.586223	0.552801
	490	-0.165972	0.396785	-0.98583	0.365463
	492	-0.137173	0.398518	-0.451411	0.504152
	494	-0.471199	0.329543	-0.551266	0.471941
	496	-0.44955	0.376592	-0.719985	0.454193
	498	-0.583544	0.295468	-0.137522	0.458632
	500	-0.533275	0.289056	-0.44431	0.46225
	502	-0.534596	0.303687	-0.609569	0.330906
	504	-0.596925	0.307048	-0.486034	0.313965
	506	-0.277228	0.317226	-0.383145	0.440042
	508	0.152603	0.551571	-0.0957298	0.396721
	510	0.056443	0.393134	-0.259287	0.425685
	512	0.0923453	0.358468	-0.486666	0.460355
	514	-0.311123	0.430847	-0.999862	0.430652
	516	-0.359853	0.486602	-0.845117	0.273311
	518	-0.647123	0.433744	-0.629399	0.422189
	520	-1.1463	0.614143	-0.845125	0.475816
	522	-1.16263	0.48519	-0.764402	0.482148
	524	-0.698196	0.543116	-0.256815	0.36439
	526	-0.889013	0.492885	0.518873	0.520488
	528	-0.94124	0.500319	0.416115	0.384018
	530	-0.478283	0.42549	0.477823	0.377736
	532	-0.162296	0.46924	0.146614	0.369505
	534	-0.760635	0.367718	0.248073	0.449487
	536	-0.402007	0.295819	-0.0323564	0.467564
	538	-0.124457	0.36991	0.314674	0.413284
	540	0.352727	0.244715	0.088428	0.450799
	542	0.708225	0.362529	0.215448	0.325984
	544	0.676764	0.356798	-0.228667	0.394734
	546	0.322109	0.339555	-0.233794	0.373981
	548	-0.134458	0.403081	-0.831894	0.327108
	550	-0.287794	0.341427	-0.779776	0.287964
	552	-0.62828	0.278559	-1.17654	0.438977
	554	-0.594797	0.306865	-0.88668	0.495421
	556	-0.500819	0.293771	-0.612151	0.560933
	558	-0.105523	0.159768	-0.375256	0.739675
	560	0.0164973	0.303698	-0.943451	0.604094
	562	0.0603706	0.299436	-0.461894	0.529929
	564	-0.0109263	0.244448	-0.786358	0.568321
	566	-0.0151266	0.405133	-0.616428	0.174851
	568	-0.398171	0.236999	-0.749075	0.317843
	570	-0.676987	0.358437	-0.761172	0.245403
	572	-0.568592	0.565199	-0.486181	0.333899
	574	-0.785642	0.439947	-0.497033	0.404848
	576	-0.639549	0.449021	-0.591744	0.425516
	578	-0.229398	0.346566	-0.778263	0.536955
	580	0.123245	0.266605	-0.615821	0.485442
	582	0.228121	0.292541	-0.332093	0.523926
	584	0.192782	0.292267	-0.0897528	0.708005
	586	0.0292027	0.272342	0.837045	0.443428
	588	-0.121001	0.216913	0.495761	0.49228
	590	-0.271494	0.336252	-0.514249	0.544945
	592	-0.643842	0.394672	-0.0897553	0.44101
	594	-0.969597	0.534665	-1.10686	0.569845
	596	-0.330772	0.473111	-0.892724	0.355661
	598	-0.160241	0.449117	0.262509	0.397772
	600	-0.105671	0.337663	0.333947	0.4278
	602	0.0927764	0.377289	0.241342	0.62091
	604	0.0320317	0.318256	0.736982	0.296105
	606	0.295091	0.407627	0.532399	0.541207
	608	-0.152092	0.3045	0.485209	0.497603
	610	0.0565306	0.298371	0.546981	0.451128
	612	-0.243861	0.261528	0.445892	0.4028
	614	-0.115026	0.194317	0.550685	0.273255
	616	0.292678	0.281718	0.153336	0.117778
	618	0.308091	0.257848	-0.156588	0.161097
	620	0.292452	0.290383	0.212502	0.235846
	622	0.718419	0.298133	-0.39432	0.189966
	624	0.706697	0.253028	-0.468085	0.364353
	626	0.542532	0.345655	-0.313077	0.366467
	628	0.539916	0.365481	-0.302744	0.440207
	630	0.346589	0.446549	-0.449356	0.337195
	632	0.355319	0.321061	-0.64785	0.403629
	634	0.220498	0.352141	-0.698234	0.409413
	636	0.325034	0.259262	-0.705215	0.439791
	638	-0.125778	0.186379	-0.784076	0.384604
	640	0.558596	0.320034	-0.568808	0.4099
	642	0.251301	0.254613	0.838667	0.329089
	644	0.392866	0.246641	0.648991	0.415405
	646	-0.227385	0.18397	0.479094	0.321623
	648	0.237565	0.230779	0.829151	0.464249
	650	-0.0719058	0.236851	0.305842	0.607391
	652	-0.0485243	0.283527	-0.333004	0.382487
	654	-0.0514867	0.247867	-0.0464799	0.432233
	656	-0.035727	0.210391	0.0278921	0.531504
	658	0.270138	0.42683	-0.285329	0.420443
	660	0.281259	0.432149	0.308075	0.520622
	662	0.15134	0.301271	0.393564	0.555766
	664	0.00665447	0.330196	0.612026	0.456502
	666	-0.139823	0.279485	0.514797	0.445651
	668	0.0289601	0.297581	0.640273	0.409734
	670	-0.35822	0.258867	0.266666	0.415724
	672	0.418927	0.328185	0.428422	0.319377
	674	-0.129769	0.255203	0.988594	0.527406
	676	0.383516	0.287932	1.22999	0.438098
	678	0.382439	0.283693	0.982293	0.451261
	680	0.408867	0.432828	0.870602	0.472671
	682	0.16961	0.284781	0.72062	0.540096
	684	0.141285	0.195859	0.503835	0.575759
	686	-0.214093	0.218891	-0.0249487	0.383167
	688	-0.459525	0.232506	0.236469	0.440735
	690	-0.550838	0.386487	0.229488	0.481725
	692	-1.0005	0.343737	-0.0825953	0.340517
	694	-0.280563	0.412035	-0.0537686	0.293334
	696	-0.0896363	0.457405	0.228394	0.287189
	698	0.380792	0.442682	0.018241	0.63337
	700	0.359735	0.633521	-0.16489	0.568145
	702	0.839315	0.359931	-0.268548	0.606017
	704	0.396247	0.280096	-0.114589	0.563299
	706	-0.192306	0.34931	-0.395349	0.259868
	708	-0.0286749	0.389852	-0.261681	0.400156
	710	-0.558388	0.340514	-0.249781	0.394431
	712	0.114202	0.350665	0.0466358	0.485973
	714	-0.293098	0.40511	-0.335588	0.459262
	716	0.0993092	0.442498	-0.0923316	0.337995
	718	-0.189821	0.469832	-0.404663	0.418061
	720	0.625847	0.320072	-0.11898	0.428836
	722	0.108195	0.237091	0.00790001	0.360762
	724	0.355378	0.252766	0.471505	0.467981
	726	0.286168	0.334507	0.542259	0.467632
	728	0.0182304	0.399898	0.353785	0.453096
	730	0.254881	0.331336	0.56127	0.377944
	732	0.392963	0.31543	0.320624	0.335105
	734	0.120364	0.325282	-0.226526	0.306113
	736	0.244839	0.327559	-0.015313	0.219076
	738	0.0126647	0.425168	-0.226943	0.134948
	740	0.266047	0.422248	-0.478739	0.198208
	742	0.341405	0.353484	-0.290616	0.339609
	744	0.447564	0.378747	0.00188765	0.43766
	746	0.336484	0.320102	0.68395	0.405372
	748	0.738689	0.374183	-0.301951	0.44367
	750	0.569134	0.542366	-0.555583	0.445276
	752	0.601309	0.539526	-0.86625	0.418121
	754	-0.0828906	0.491324	-0.372746	0.407113
	756	0.249125	0.347934	-0.617192	0.510649
	758	0.50547	0.347582	-0.54246	0.623083
	760	0.333539	0.391343	-0.0898605	0.392071
	762	0.0554122	0.339243	0.353376	0.260214
	764	0.124903	0.402863	-0.0477782	0.433879
	766	0.357128	0.315086	-0.291867	0.260848
	768	0.062164	0.235596	-0.446063	0.347642
	770	-0.0834056	0.257696	-0.456568	0.351468
	772	-0.081731	0.255693	-0.647896	0.442976
	774	0.233185	0.25834	-0.242391	0.428779
	776	0.334187	0.226495	-0.219615	0.279027
	778	0.289853	0.230567	-0.222359	0.255923
	780	0.711281	0.20927	-0.0677085	0.157549
	782	0.502879	0.298648	0.0563454	0.263286
	784	0.0998318	0.313022	0.387637	0.22878
	786	-0.0860551	0.293454	0.61738	0.370157
	788	0.368461	0.332436	0.345557	0.380791
	790	0.25129	0.343095	-0.0409861	0.459974
	792	0.329632	0.298244	0.0633333	0.430259
	794	0.669154	0.559205	-0.797207	0.399444
	796	0.418681	0.235643	-0.397296	0.423083
	798	0.503578	0.269471	-0.234781	0.455272
	800	0.621775	0.382404	-0.203979	0.501614
	802	0.386812	0.358928	0.277377	0.590203
	804	0.219006	0.228608	0.592558	0.431393
	806	0.0121072	0.331052	0.136372	0.348073
	808	-0.0363155	0.365555	0.212333	0.365623
	810	0.0982719	0.388928	-0.0805315	0.575242
	812	0.571301	0.260406	-0.544203	0.512217
	814	0.545332	0.297837	-0.548027	0.510741
	816	0.691906	0.243692	0.132405	0.673394
	818	0.022512	0.277679	0.246989	0.726138
	820	-0.0865645	0.353182	0.142891	0.717844
	822	-0.469879	0.399329	0.304929	0.477688
	824	-0.184744	0.386027	-0.117654	0.264251
	826	-0.02741	0.334178	-0.534808	0.376657
	828	0.193399	0.362222	-0.393123	0.318369
	830	0.605889	0.340564	-0.463255	0.452784
	832	1.00804	0.410665	-0.446364	0.396003
	834	0.79748	0.451518	-0.309263	0.36318
	836	0.791534	0.465091	-0.310374	0.37497
	838	0.652823	0.472255	0.63627	0.572027
	840	0.538309	0.465645	0.109335	0.542792
	842	0.237489	0.216655	0.26786	0.542304
	844	0.331922	0.202758	0.0700759	0.517197
	846	-0.161481	0.345306	0.124986	0.409155
	848	-0.190542	0.321552	0.371836	0.243254
	850	-0.0520838	0.32263	0.290535	0.257502
	852	-0.183792	0.389054	0.437995	0.360019
	854	-0.129999	0.31501	1.01065	0.435426
	856	0.312033	0.292414	0.650664	0.447354
	858	0.398758	0.299232	0.554877	0.444962
	860	0.115522	0.365036	0.233774	0.241165
	862	0.244374	0.453893	0.389506	0.222126
	864	-0.175639	0.459576	-0.0814976	0.52491
	866	-0.553236	0.377323	0.020194	0.396514
	868	0.11302	0.31062	-0.381363	0.47625
	870	0.150388	0.237016	-1.05426	0.484113
	872	0.131312	0.352462	0.139566	0.825441
	874	0.275836	0.368748	0.266231	0.916826
	876	0.172785	0.261654	0.397954	0.748525
	878	0.652555	0.606904	-0.715295	0.586718
	880	0.653705	0.486169	0.401394	0.694377
	882	0.623834	0.370611	-0.118069	0.539893
	884	0.954756	0.391967	0.143866	0.480126
	886	0.883988	0.386877	0.0904554	0.378074
	888	0.622052	0.382844	0.581912	0.535002
	890	0.487337	0.36214	0.151293	0.442423
	892	0.62481	0.305478	0.435754	0.616081
	894	0.525888	0.293148	0.138251	0.573675
	896	0.541534	0.335335	0.2823	0.473586
	898	0.569717	0.281248	-0.00293692	0.478225
	900	0.509698	0.471322	0.17193	0.491588
	902	0.341756	0.463886	0.546318	0.500933
	904	0.122015	0.409849	0.329342	0.427452
	906	0.271638	0.559695	0.466596	0.568609
	908	0.510094	0.486459	0.764737	0.366887
	910	0.384501	0.292507	0.478411	0.292224
	912	0.391851	0.280344	0.752444	0.255657
	914	0.543963	0.283944	0.343103	0.39557
	916	0.467796	0.283328	0.119367	0.204946
	918	0.420689	0.379058	0.299557	0.154877
	920	0.243925	0.418044	0.295728	0.146801
	922	0.415781	0.346461	0.289247	0.187148
	924	0.0736774	0.434455	0.362271	0.216303
	926	-0.0216948	0.454543	0.118741	0.485899
	928	0.39056	0.470405	0.473153	0.605862
	930	0.546879	0.489976	0.632394	0.512261
	932	0.736058	0.473092	0.985043	0.416266
	934	0.619741	0.338925	1.011	0.425031
	936	0.852817	0.468304	0.614745	0.313265
	938	0.466914	0.374956	0.675447	0.547172
	940	0.912066	0.354694	0.0152132	0.329189
	942	0.896409	0.381353	-0.184381	0.233142
	944	0.854639	0.340806	-0.444575	0.272303
	946	0.690307	0.25665	0.193931	0.331164
	948	0.0506165	0.244515	0.621785	0.298268
	950	0.0382107	0.282563	1.0077	0.488647
	952	0.102132	0.278302	0.37321	0.43264
	954	0.0510176	0.301238	0.703179	0.4257
	956	-0.832655	0.4539	-1.23663	0.494665
	958	-2.86553	0.507338	-2.78502	0.598279

## Sheet: Fig.5e
	Time traces						Post-training PKCδ activity
		Control (unpaired)		5x spaced			Control (unpaired)	5x spaced
	Time (s)	Mean	SEM	Mean	SEM		0.995602	1.02527
	0	-4.00618	0.912957	-0.757623	0.660001		0.998862	1.02192
	2	-2.00639	0.546377	0.450538	0.824003		0.988062	1.00212
	4	-0.837787	0.512325	1.47351	0.886171		0.997925	1.01683
	6	-0.686117	0.554813	1.45967	0.882675		1.002	1.04456
	8	-0.727935	0.708129	1.66304	0.842877		0.990882	1.01866
	10	-0.902653	0.729477	1.71731	0.78645		1.01533	1.01527
	12	-1.11008	0.72766	1.60192	0.636836		1.01134	1.03335
	14	-1.15712	0.745543	1.29628	0.436246
	16	-0.889214	0.677794	1.10007	0.462343
	18	-1.25106	0.445519	0.79598	0.416331
	20	-1.17667	0.494052	0.77459	0.561915
	22	-1.21063	0.523393	0.802054	0.542571
	24	-1.43419	0.521911	0.659474	0.647272
	26	-1.60951	0.446364	0.265411	0.624135
	28	-1.58254	0.51479	0.926786	0.640607
	30	-2.03959	0.532449	0.747102	0.64637
	32	-1.83355	0.552512	0.897193	0.723068
	34	-1.94282	0.639368	1.24391	0.546416
	36	-1.02974	0.798255	1.40629	0.51492
	38	-0.94979	0.712629	0.903406	0.377531
	40	-0.806525	0.581927	0.809735	0.526224
	42	-0.855456	0.631801	1.03606	0.566175
	44	-0.854008	0.520254	0.87659	0.569021
	46	-0.914349	0.440161	0.919959	0.48915
	48	-1.3396	0.34033	0.70231	0.356226
	50	-0.718761	0.332301	0.674416	0.539313
	52	-1.32172	0.264315	0.911596	0.585035
	54	-1.29423	0.359794	0.863317	0.575965
	56	-1.14079	0.216987	0.958646	0.501223
	58	-1.1992	0.27838	0.657068	0.461115
	60	-1.43036	0.454294	0.570841	0.405978
	62	-1.22978	0.467921	0.256823	0.609338
	64	-1.27461	0.451533	0.328874	0.569663
	66	-1.37128	0.498746	0.151879	0.57274
	68	-1.48918	0.522303	0.606945	0.65775
	70	-2.10329	0.475491	0.886827	0.561734
	72	-1.63041	0.432195	0.87538	0.686423
	74	-1.88281	0.516171	0.517676	0.692706
	76	-1.80516	0.417244	0.741846	0.643502
	78	-1.69966	0.414553	0.654846	0.452142
	80	-1.62085	0.433955	0.244417	0.418709
	82	-1.72108	0.387531	0.447943	0.468801
	84	-1.40446	0.455932	0.721662	0.402691
	86	-1.12885	0.248863	1.21033	0.40926
	88	-1.27026	0.327847	0.997789	0.410909
	90	-1.25617	0.323457	1.22915	0.33996
	92	-1.57839	0.340725	0.753884	0.424679
	94	-1.42854	0.422044	0.769389	0.435238
	96	-1.677	0.410483	0.978426	0.489861
	98	-1.63599	0.458222	1.05727	0.46975
	100	-1.91742	0.493662	0.765993	0.583595
	102	-1.86899	0.455882	0.945429	0.417566
	104	-1.91045	0.39995	0.798649	0.385754
	106	-1.72755	0.374368	1.04651	0.517102
	108	-1.38666	0.358568	0.709412	0.712342
	110	-1.03448	0.530676	0.8426	0.526805
	112	-0.787646	0.392156	1.15197	0.785314
	114	-1.08499	0.516836	0.985283	0.670963
	116	-0.776881	0.719647	0.700084	0.729024
	118	-0.822184	0.636693	0.0527987	1.49244
	120	-1.05553	0.49589	0.110995	1.52239
	122	-0.833762	0.667361	0.159954	1.61669
	124	-0.220771	0.710975	0.118547	1.51834
	126	0.144802	0.519916	1.0817	1.15587
	128	-0.228358	0.382165	1.06189	0.945041
	130	-0.0477257	0.428681	1.50707	0.560242
	132	-0.21548	0.366423	1.12481	0.433681
	134	-0.32986	0.210958	1.05735	0.434787
	136	-0.428276	0.334093	1.07621	0.435037
	138	0.00908858	0.292785	0.836835	0.371748
	140	-0.0926664	0.33652	1.43456	0.383248
	142	0.285464	0.306179	1.27664	0.455768
	144	0.21423	0.355621	1.32734	0.415597
	146	-0.0701613	0.349824	1.31035	0.462613
	148	-0.349108	0.458976	1.49467	0.428903
	150	-0.425876	0.442654	1.35915	0.525114
	152	-0.399146	0.385438	1.55675	0.325171
	154	-0.0736371	0.419251	1.37872	0.44822
	156	-0.0156886	0.520908	1.44918	0.46547
	158	0.119405	0.424834	1.45899	0.368906
	160	0.494886	0.358146	1.58266	0.407423
	162	0.00595205	0.5982	1.57674	0.376215
	164	-0.322059	0.524395	1.68805	0.507877
	166	-0.325104	0.525634	1.43231	0.488813
	168	0.15259	0.544393	1.43033	0.49302
	170	-0.149764	0.432893	1.51476	0.538068
	172	0.135068	0.413997	1.51625	0.564956
	174	0.0515406	0.451026	1.49107	0.658122
	176	0.218471	0.373322	1.47288	0.77332
	178	0.130832	0.340384	1.74752	0.789535
	180	0.600094	0.387851	1.44493	0.726253
	182	0.758953	0.497562	1.6409	0.569209
	184	0.567847	0.526436	2.04603	0.49807
	186	0.579299	0.614554	1.77903	0.488988
	188	0.771405	0.697951	1.58315	0.333062
	190	0.197051	0.468913	1.74613	0.347643
	192	0.570522	0.612015	1.63	0.389603
	194	1.00227	0.73262	1.71561	0.313321
	196	1.0052	0.903387	1.16858	0.434557
	198	0.869156	0.788869	1.13708	0.296137
	200	1.23414	0.922496	1.22415	0.470034
	202	1.30097	0.850678	1.19484	0.496894
	204	0.959425	0.728508	1.02357	0.668844
	206	0.849902	0.71232	1.21796	0.514785
	208	0.607178	0.679185	1.48815	0.550194
	210	0.557579	0.730287	1.12039	0.710052
	212	0.191474	0.717599	1.3119	0.610723
	214	0.913985	0.913576	1.04497	0.51884
	216	0.799651	0.855655	1.39621	0.46067
	218	0.579542	0.9311	0.667955	0.588249
	220	0.527028	0.859012	0.895864	0.347506
	222	0.587578	0.781201	0.4686	0.562924
	224	0.711611	0.720482	0.887885	0.442379
	226	0.435183	0.605483	0.753764	0.427346
	228	0.817643	0.609629	0.398901	0.292032
	230	0.811647	0.576002	0.32868	0.265761
	232	0.700583	0.488864	-0.1909	0.673436
	234	0.746108	0.615178	0.193446	0.709219
	236	0.931074	0.664576	-0.00952264	0.681535
	238	1.36295	0.591235	0.517711	0.709358
	240	1.2797	0.620562	0.9042	0.7116
	242	1.13667	0.638256	0.908944	0.575566
	244	1.02031	0.606707	1.20766	0.325661
	246	1.05995	0.439027	1.29322	0.345988
	248	0.624513	0.423792	1.2088	0.341103
	250	0.484893	0.481508	1.21556	0.276656
	252	0.82239	0.601319	0.958987	0.121982
	254	0.835291	0.601118	1.05862	0.234351
	256	0.584499	0.671755	1.25561	0.473194
	258	0.378398	0.554222	1.55662	0.542474
	260	0.457665	0.503763	1.52978	0.521155
	262	0.463517	0.513449	1.47336	0.52382
	264	0.547718	0.452318	1.39799	0.501561
	266	0.695914	0.450183	1.57755	0.473675
	268	0.860422	0.473882	1.17368	0.542323
	270	1.03225	0.491158	0.95448	0.499614
	272	1.19594	0.594056	0.946811	0.475803
	274	1.11581	0.509359	1.54886	0.387802
	276	0.968562	0.63581	1.03405	0.417216
	278	0.904022	0.465309	1.05616	0.198803
	280	0.726482	0.466222	0.658653	0.498597
	282	0.49573	0.445857	1.14132	0.623064
	284	1.00285	0.299601	0.390339	0.537613
	286	0.733725	0.360615	0.616834	0.522946
	288	0.656081	0.264513	0.888918	0.279969
	290	0.579822	0.265011	0.948887	0.390216
	292	0.678855	0.343287	0.851654	0.410323
	294	0.420104	0.4073	0.966121	0.339212
	296	0.27601	0.438405	0.890195	0.394129
	298	0.566816	0.403442	0.970755	0.449853
	300	0.475439	0.632919	0.844349	0.456256
	302	-0.0567722	0.550313	0.866505	0.40668
	304	-0.0713982	0.550763	0.752803	0.441913
	306	0.552353	0.583501	0.700067	0.352606
	308	0.280372	0.486478	0.805888	0.224759
	310	0.197048	0.410912	0.700922	0.24552
	312	0.793767	0.688146	0.690144	0.185712
	314	0.457731	0.401682	0.852025	0.271524
	316	0.343453	0.462112	0.950347	0.228916
	318	0.642434	0.617966	1.0725	0.280819
	320	0.263153	0.433502	1.46491	0.217279
	322	0.227637	0.39117	1.36126	0.275774
	324	0.305703	0.47044	1.19663	0.340235
	326	0.0708542	0.318971	0.684475	0.436532
	328	0.0415258	0.291149	0.75299	0.546071
	330	0.468685	0.559658	0.755171	0.449376
	332	0.396254	0.699231	1.11471	0.501962
	334	0.170748	0.481222	0.881877	0.502109
	336	0.377269	0.556712	1.16664	0.319967
	338	0.260825	0.544802	0.709776	0.276695
	340	0.425747	0.479059	0.231619	0.295481
	342	0.142776	0.392816	0.322257	0.348855
	344	-0.174854	0.493665	0.373698	0.473117
	346	-0.425825	0.409922	0.545532	0.462378
	348	-0.446742	0.40644	0.527153	0.398835
	350	-0.440796	0.441824	0.663371	0.37385
	352	-0.328674	0.341636	0.630324	0.263303
	354	-0.0372223	0.386252	0.472762	0.319351
	356	0.0288871	0.430503	0.092545	0.374961
	358	0.192093	0.359812	0.746382	0.304396
	360	0.381748	0.565609	0.423893	0.469391
	362	0.413666	0.513019	0.494702	0.435098
	364	0.437692	0.520693	0.505532	0.386396
	366	0.40504	0.485582	0.630682	0.366513
	368	0.371156	0.447398	0.886884	0.307046
	370	-0.00542601	0.358535	0.586504	0.34008
	372	0.00205258	0.296995	1.10453	0.178135
	374	-0.112504	0.378049	1.18558	0.210358
	376	-0.00549765	0.162736	0.736719	0.33705
	378	0.188073	0.190658	0.780326	0.416268
	380	0.369811	0.14094	0.861553	0.327292
	382	0.754272	0.0985068	0.432373	0.520747
	384	0.338644	0.286223	0.218577	0.443168
	386	0.47176	0.188846	0.471183	0.378974
	388	0.310715	0.294153	0.455647	0.364487
	390	0.399316	0.498719	0.702282	0.395279
	392	0.00932885	0.599555	0.440557	0.563817
	394	0.116336	0.7679	0.480145	0.540239
	396	0.155124	0.77649	0.511988	0.467015
	398	0.427756	0.684177	0.524043	0.359936
	400	0.480977	0.517782	0.934697	0.190725
	402	0.661764	0.337053	0.844756	0.241902
	404	0.822779	0.322295	0.606777	0.293724
	406	0.890783	0.3272	0.896351	0.385349
	408	0.741897	0.415554	0.972831	0.25635
	410	0.32321	0.442075	1.04143	0.341424
	412	0.417916	0.458557	1.15273	0.295127
	414	0.199308	0.566344	1.39893	0.401636
	416	0.0340574	0.596722	1.41523	0.280818
	418	0.399754	0.368154	1.07193	0.233088
	420	0.55509	0.445668	1.07795	0.298325
	422	0.255194	0.516916	0.588912	0.408253
	424	0.133923	0.446539	0.328147	0.527842
	426	0.390464	0.329382	0.797211	0.417287
	428	0.209842	0.320701	1.02046	0.501679
	430	0.140458	0.282405	0.705813	0.447164
	432	0.0509192	0.274631	0.835047	0.396412
	434	0.0949629	0.23745	0.449654	0.533992
	436	0.363766	0.243105	0.34455	0.439727
	438	0.0914967	0.287565	0.140327	0.555656
	440	-0.129246	0.30399	0.413636	0.32892
	442	-0.0424311	0.26821	-0.292671	0.497739
	444	-0.0775184	0.463636	-0.13015	0.339356
	446	-0.131613	0.360772	-0.407354	0.554316
	448	-0.0183398	0.455823	-0.180414	0.328671
	450	0.0635075	0.44387	-0.213623	0.365295
	452	0.210312	0.474952	0.219954	0.343674
	454	-0.3428	0.218308	0.26435	0.341802
	456	0.185581	0.272546	0.612702	0.291113
	458	0.0590877	0.24139	0.540737	0.273742
	460	0.0463487	0.237008	0.360386	0.3983
	462	-0.00133124	0.222954	0.227963	0.367986
	464	0.159549	0.420066	-0.522705	0.438322
	466	-0.029816	0.38982	-0.0264564	0.377243
	468	0.312536	0.18181	-0.323778	0.42946
	470	0.516746	0.26293	0.0212947	0.441758
	472	0.374526	0.182547	0.158154	0.46625
	474	0.548724	0.223394	1.08582	0.350065
	476	0.995431	0.268991	0.614498	0.601342
	478	0.954562	0.32362	0.84251	0.416269
	480	0.890061	0.388326	0.742614	0.400668
	482	0.69215	0.25976	0.475228	0.30828
	484	0.64125	0.33318	0.160373	0.25884
	486	0.529475	0.358941	0.0276201	0.163352
	488	0.495671	0.338743	0.486594	0.185536
	490	0.189656	0.225887	0.534804	0.277267
	492	-0.177673	0.302491	0.419051	0.367869
	494	-0.186914	0.233415	0.44941	0.249018
	496	-0.295068	0.252573	0.0510246	0.404115
	498	0.17994	0.389512	-0.240354	0.395657
	500	0.566489	0.487738	0.0613722	0.292198
	502	0.572261	0.502036	-0.40825	0.492039
	504	0.463154	0.485461	0.00308657	0.431395
	506	0.482936	0.436574	0.0961274	0.273451
	508	0.404992	0.391729	0.377118	0.304907
	510	0.298917	0.364192	-0.0952021	0.264083
	512	0.356487	0.339206	0.222829	0.41261
	514	0.30344	0.425671	0.367177	0.42549
	516	0.403516	0.305383	0.588932	0.336898
	518	0.044669	0.405511	0.486053	0.391789
	520	-0.0403948	0.435184	0.863784	0.393356
	522	0.303707	0.336091	0.549755	0.311823
	524	-0.170638	0.347301	0.104676	0.330526
	526	0.0308032	0.276742	0.0417356	0.325468
	528	0.329128	0.248456	-0.0132298	0.358465
	530	0.472288	0.336344	-0.21239	0.309445
	532	0.634607	0.445666	-0.0718879	0.271257
	534	0.904589	0.4046	0.0512182	0.239099
	536	0.477042	0.345185	0.118263	0.280624
	538	0.397395	0.236958	0.35426	0.240311
	540	-0.18269	0.209429	0.213555	0.296054
	542	-0.320277	0.199014	0.0825927	0.332682
	544	-0.171325	0.356463	-0.16422	0.333304
	546	0.236804	0.318257	0.00417268	0.281454
	548	-0.26054	0.420333	0.188464	0.347641
	550	-0.378344	0.356242	0.403761	0.316249
	552	0.0360104	0.286002	0.523088	0.458699
	554	-0.194544	0.342069	0.361599	0.381914
	556	-0.058868	0.202796	0.191918	0.413022
	558	0.0269576	0.177018	-0.0785499	0.382192
	560	0.322905	0.281149	0.000414775	0.360716
	562	-0.235387	0.294499	-0.174937	0.298874
	564	-0.119655	0.393662	0.271311	0.265149
	566	-0.485176	0.337066	0.34532	0.28155
	568	-0.644436	0.260156	0.0675745	0.325261
	570	-0.523417	0.194146	0.1346	0.307092
	572	-0.241039	0.117065	0.217416	0.290075
	574	-0.289194	0.128931	-0.382836	0.276523
	576	-0.181855	0.124446	0.182031	0.371112
	578	-0.107337	0.222453	0.611429	0.332893
	580	-0.158362	0.255267	0.343825	0.275243
	582	-0.44011	0.234137	0.457827	0.267905
	584	-0.477658	0.280869	0.56591	0.311316
	586	-0.222659	0.327331	0.306493	0.346915
	588	-0.107736	0.195615	0.406687	0.285883
	590	-0.110933	0.159637	0.45097	0.330614
	592	0.212555	0.295417	0.582933	0.361983
	594	0.0308788	0.330177	0.763438	0.414983
	596	-0.283007	0.317466	0.201539	0.339171
	598	-0.264779	0.262568	0.00412575	0.323944
	600	-0.143307	0.235861	-0.0190133	0.245177
	602	-0.294468	0.280272	-0.0685431	0.309931
	604	-0.163216	0.327951	-0.331772	0.419798
	606	0.127003	0.27578	-0.00391714	0.533426
	608	-0.176897	0.2609	0.332327	0.396401
	610	-0.0448686	0.197524	0.419096	0.447998
	612	0.142468	0.305026	0.134588	0.311266
	614	0.19401	0.266555	0.0975188	0.255218
	616	0.594461	0.249199	0.262087	0.337203
	618	0.562767	0.309953	-0.0701372	0.285394
	620	0.643438	0.267859	-0.142982	0.287792
	622	0.658057	0.362483	0.03333	0.421403
	624	0.143179	0.299345	-0.180026	0.415898
	626	-0.749451	0.385443	-0.386726	0.353001
	628	-0.608076	0.401882	-0.62084	0.351838
	630	-0.579921	0.385804	-0.724405	0.403313
	632	-0.766205	0.353827	-0.516184	0.400832
	634	-0.609941	0.365611	-0.157914	0.303598
	636	-0.324018	0.391972	-0.0128361	0.178983
	638	-0.204146	0.15466	0.161707	0.219636
	640	-0.419142	0.18848	0.437225	0.205752
	642	-0.0464246	0.195658	0.479377	0.333038
	644	-0.220871	0.297336	0.369192	0.351975
	646	-0.441291	0.296862	0.205049	0.318543
	648	-0.282761	0.358973	0.205501	0.325866
	650	-0.258715	0.383138	-0.0550763	0.283033
	652	-0.452445	0.312156	-0.0890006	0.307324
	654	-0.614925	0.267598	0.312197	0.332332
	656	-0.502305	0.356951	0.83626	0.418061
	658	-0.23357	0.280019	1.0996	0.288624
	660	0.0669465	0.272333	0.699912	0.3276
	662	-0.00386457	0.367607	0.218371	0.343741
	664	0.119836	0.40443	0.158936	0.36669
	666	0.166168	0.484106	-0.335469	0.377261
	668	0.0272875	0.274307	-0.395679	0.348727
	670	-0.161967	0.19685	0.00832525	0.378014
	672	0.0466709	0.356413	0.50766	0.548236
	674	-0.162805	0.277876	0.679205	0.492991
	676	-0.511485	0.313508	0.897964	0.454363
	678	-0.321655	0.288695	0.583245	0.497394
	680	-0.153152	0.396415	0.63257	0.523927
	682	-0.06249	0.250605	0.488939	0.56436
	684	0.227398	0.397056	0.275212	0.586281
	686	-0.168421	0.226527	0.340452	0.632593
	688	-0.122545	0.385166	0.322288	0.374279
	690	-0.316706	0.324486	0.111626	0.474723
	692	0.0208942	0.360206	-0.154172	0.306138
	694	0.215697	0.286241	-0.189291	0.354644
	696	-0.0962518	0.416894	-0.263748	0.218024
	698	-0.0883179	0.411889	-0.0512911	0.467478
	700	-0.0831043	0.377743	-0.0730602	0.425381
	702	0.052113	0.333389	0.521369	0.626603
	704	0.00798057	0.224675	0.31427	0.527364
	706	0.361842	0.191411	-0.287177	0.385771
	708	0.067193	0.309234	-0.423054	0.322914
	710	0.176688	0.353346	0.211525	0.27575
	712	0.243057	0.340853	0.265185	0.366009
	714	-0.208374	0.318317	0.151068	0.339374
	716	-0.232837	0.3151	0.423894	0.374922
	718	-0.228553	0.358592	0.488516	0.362558
	720	-0.191019	0.305287	0.607395	0.312153
	722	0.125178	0.317414	0.258136	0.347302
	724	0.0557733	0.398412	0.59877	0.310774
	726	-0.011129	0.409113	0.135354	0.309458
	728	0.0106619	0.490665	-0.264006	0.436991
	730	0.0462759	0.45966	0.0679699	0.434827
	732	0.0200051	0.348501	-0.34127	0.346443
	734	0.409328	0.339995	-0.209315	0.379619
	736	0.307086	0.304334	-0.322107	0.353976
	738	0.236682	0.29437	-0.408508	0.271915
	740	0.131601	0.414363	-0.465646	0.336886
	742	-0.167644	0.515322	-0.767404	0.437083
	744	-0.0200587	0.40026	-0.753272	0.260043
	746	0.0432791	0.405189	-0.605121	0.282717
	748	-0.0650685	0.446722	-0.617099	0.223155
	750	0.0613348	0.500716	-0.482117	0.196735
	752	-0.148337	0.329768	-0.27104	0.177902
	754	-0.139352	0.217192	-0.170694	0.138843
	756	-0.00560912	0.222256	-0.451373	0.230408
	758	-0.193206	0.343915	-0.512738	0.287862
	760	-0.205263	0.320844	-0.207531	0.14334
	762	-0.24989	0.292324	-0.544916	0.347448
	764	-0.154232	0.371241	-0.072976	0.265849
	766	-0.176512	0.266913	-0.12252	0.499882
	768	0.0862863	0.265769	-0.500086	0.350949
	770	-0.0315402	0.357101	-0.239502	0.427781
	772	0.141462	0.380597	0.15246	0.359982
	774	-0.0984531	0.327718	-0.291656	0.211028
	776	0.040513	0.31335	-0.483994	0.239376
	778	-0.182705	0.323604	-0.401483	0.177637
	780	0.034944	0.374987	-0.255891	0.186177
	782	0.15122	0.392174	-0.0574411	0.218888
	784	0.221691	0.376224	0.11083	0.230011
	786	-0.147358	0.40218	0.553974	0.265746
	788	-0.179399	0.361213	0.500685	0.237844
	790	-0.60774	0.242262	0.317907	0.440163
	792	-0.638639	0.312264	0.592048	0.482193
	794	-0.535835	0.281365	0.168279	0.581795
	796	-0.392184	0.311409	-0.369705	0.610188
	798	-0.344876	0.244404	-0.523935	0.469613
	800	0.0333124	0.378696	-0.365231	0.354358
	802	-0.120041	0.370149	-0.811549	0.296947
	804	0.0339607	0.290817	-0.437881	0.360127
	806	0.113618	0.361932	0.257398	0.520922
	808	0.317067	0.346346	0.230604	0.447391
	810	0.0650512	0.331418	0.0781598	0.441755
	812	0.0118176	0.471237	0.229103	0.412073
	814	-0.0289702	0.353678	0.386304	0.366613
	816	-0.266537	0.257594	0.325822	0.310751
	818	-0.106895	0.26786	0.153976	0.357008
	820	-0.206018	0.169175	-0.170259	0.311663
	822	-0.244493	0.204247	-0.263744	0.283548
	824	-0.449172	0.231672	-0.43835	0.372988
	826	-0.0404892	0.232017	-0.673146	0.239358
	828	0.0788257	0.276282	-0.636118	0.141562
	830	0.102387	0.328657	-0.641108	0.303185
	832	0.139536	0.343072	-0.229253	0.34921
	834	0.121234	0.345774	-0.248872	0.35149
	836	0.0780646	0.34169	-0.168155	0.510736
	838	0.0873373	0.329587	-0.0511518	0.463144
	840	-0.0993162	0.285752	0.160535	0.486278
	842	-0.40741	0.254283	-0.383039	0.45519
	844	-0.276563	0.302887	-0.507998	0.234659
	846	-0.248652	0.38066	-0.146771	0.249737
	848	-0.103071	0.365709	-0.210187	0.244329
	850	0.0230459	0.320361	-0.501769	0.22343
	852	0.169729	0.397236	0.035251	0.313972
	854	0.284813	0.370183	-0.0546657	0.415495
	856	0.136589	0.295568	-0.549949	0.339347
	858	0.104657	0.265463	-0.913049	0.48418
	860	0.248984	0.362681	-0.9168	0.707152
	862	-0.291029	0.235782	-1.00337	0.708096
	864	-0.258159	0.211856	-0.610578	0.513379
	866	-0.267189	0.143872	-0.337846	0.376052
	868	-0.377605	0.166867	-0.505594	0.350614
	870	-0.284818	0.243146	-0.391627	0.287709
	872	-0.618347	0.182424	-0.748625	0.30597
	874	-0.87715	0.232375	-0.678725	0.455841
	876	-0.958122	0.226734	-0.691465	0.396773
	878	-0.737241	0.126766	-0.637764	0.269134
	880	-0.315584	0.314061	-0.920602	0.277982
	882	-0.0338644	0.2658	-0.540763	0.520005
	884	0.134064	0.264589	-0.399629	0.541755
	886	0.478878	0.290282	-0.424725	0.497879
	888	0.192861	0.44525	-0.452739	0.521224
	890	-0.124544	0.387843	-0.273393	0.555882
	892	-0.130768	0.428719	-0.716452	0.332917
	894	-0.10742	0.313329	-0.998275	0.372263
	896	0.0366612	0.285135	-0.861991	0.683369
	898	-0.134263	0.325143	-1.27936	0.297219
	900	0.0983599	0.211307	-1.17169	0.417171
	902	0.0556534	0.191757	-1.08344	0.357468
	904	-0.0432392	0.325932	-0.805645	0.533674
	906	-0.308407	0.214867	-0.766197	0.313289
	908	0.10138	0.325359	-0.567444	0.360846
	910	0.277694	0.31374	-0.390812	0.283641
	912	0.458708	0.246033	-0.29537	0.30693
	914	0.199202	0.343603	-0.226593	0.22438
	916	0.436475	0.276622	0.0704104	0.216463
	918	0.256902	0.289148	0.208348	0.240148
	920	0.196693	0.155766	0.320605	0.267795
	922	-0.403943	0.315305	0.216774	0.205904
	924	-0.598815	0.412332	-0.0658509	0.386494
	926	-0.484156	0.472639	-0.0819917	0.453467
	928	-0.564738	0.322668	-0.334018	0.375038
	930	-0.372319	0.403055	-0.666126	0.518168
	932	-0.0755248	0.42049	-0.450685	0.536239
	934	-0.0498244	0.393664	-1.04458	0.467944
	936	0.265617	0.260242	-1.00865	0.463897
	938	0.568808	0.356042	-0.418723	0.473959
	940	0.0859684	0.240924	-0.66911	0.388167
	942	0.161509	0.305892	-0.154592	0.510343
	944	-0.00342959	0.353961	-0.514501	0.610706
	946	-0.0210843	0.385716	-0.414574	0.511032
	948	0.175568	0.467946	-0.203576	0.416066
	950	0.00149935	0.346285	-0.437775	0.505545
	952	-0.067214	0.391822	-0.436709	0.472817
	954	0.0498281	0.365124	-0.646384	0.499691
	956	-0.794569	0.548993	-1.14924	0.534322
	958	-2.1298	0.577786	-2.53518	0.85496

## Sheet: Fig.5f
	Time traces						Post-training PKCδ activity
		Control (unpaired)		5x spaced			Control (unpaired)	5x spaced
	Time (s)	Mean	SEM	Mean	SEM		0.992964	0.992159
	0	-6.20059	1.36805	-3.61225	0.822857		1.00782	1.01812
	2	-3.04946	0.444591	-1.79368	0.615602		0.988457	1.02537
	4	-2.02102	0.299351	-1.09089	0.760764		1.01515	1.0088
	6	-2.65963	0.387903	-0.99789	0.874919		0.998486	0.995731
	8	-2.69865	0.409947	-0.703881	0.792203		0.986214	1.01704
	10	-2.334	0.542158	-0.4767	0.748688		1.00361	1.00703
	12	-2.61848	0.584166	-0.776504	0.816284		0.999285	0.995176
	14	-2.74749	0.561035	-0.621447	0.669775		1.00802
	16	-2.55206	0.530505	-0.73767	0.627028
	18	-2.2148	0.484064	-1.2731	0.821387
	20	-2.5943	0.478959	-1.41554	0.856578
	22	-2.35057	0.544401	-0.846205	0.785451
	24	-2.31866	0.643015	0.083799	0.819968
	26	-2.11441	0.605487	-0.229131	0.727736
	28	-2.28646	0.584937	-0.0137765	0.841383
	30	-1.69439	0.626805	-0.174131	0.616249
	32	-1.86526	0.67227	-0.24289	0.463423
	34	-2.00488	0.365959	-0.665016	0.660545
	36	-1.73975	0.451671	-0.77013	0.347472
	38	-1.78957	0.436309	-1.01966	0.346643
	40	-1.85148	0.404199	-1.25901	0.316815
	42	-2.00721	0.553452	-1.57598	0.526566
	44	-1.78992	0.504801	-0.969578	0.409182
	46	-2.08279	0.58937	-1.10279	0.428418
	48	-1.88303	0.595785	-1.52028	0.360123
	50	-2.38234	0.651373	-1.27992	0.426207
	52	-1.97791	0.601052	-1.55239	0.357202
	54	-2.25594	0.591092	-1.66309	0.461323
	56	-2.21556	0.527551	-1.7857	0.446341
	58	-2.2255	0.469646	-1.84517	0.555151
	60	-1.88304	0.44762	-1.91619	0.586087
	62	-2.42007	0.598722	-1.7907	0.543881
	64	-1.2061	0.358073	-1.97333	0.555654
	66	-1.24504	0.333144	-1.75942	0.456907
	68	-1.79294	0.372999	-2.01013	0.516645
	70	-1.75265	0.325591	-1.86315	0.419781
	72	-1.55704	0.333128	-1.81043	0.342712
	74	-2.10794	0.474613	-1.63963	0.504535
	76	-1.96711	0.606674	-1.19103	0.494991
	78	-2.60346	0.567526	-1.32692	0.488249
	80	-2.45215	0.557918	-1.0183	0.757093
	82	-2.44731	0.571074	-1.74456	0.906529
	84	-1.93614	0.497706	-1.84591	0.685648
	86	-1.66379	0.475597	-2.18687	0.668673
	88	-1.5807	0.399893	-2.36416	0.54622
	90	-1.56318	0.419931	-2.2706	0.506817
	92	-1.73987	0.478359	-2.08022	0.58031
	94	-1.7709	0.503142	-2.06384	0.493122
	96	-2.25777	0.43553	-1.41923	0.496747
	98	-1.89479	0.374421	-1.40918	0.501474
	100	-2.21012	0.374734	-1.41967	0.613419
	102	-2.23446	0.58929	-1.26582	0.607469
	104	-2.59595	0.553869	-1.57089	0.657946
	106	-2.21133	0.322459	-1.69649	0.650067
	108	-2.35715	0.243513	-1.65082	0.566998
	110	-2.34271	0.378776	-0.727326	0.876246
	112	-1.68904	0.398134	-1.00606	0.858437
	114	-1.80617	0.461803	-0.987444	0.68811
	116	-2.26754	0.472172	-0.680966	0.934972
	118	-2.20906	0.477271	-1.12541	1.08763
	120	-1.75465	0.477406	-1.37968	1.04598
	122	-2.30972	0.510835	-1.03389	1.14565
	124	-2.04854	0.626059	-2.10213	1.26915
	126	-2.03	0.617257	-2.24005	0.35835
	128	-2.24017	0.576794	-2.19935	0.301798
	130	-2.115	0.648514	-1.97345	0.265532
	132	-1.78228	0.719837	-1.21966	0.550016
	134	-2.05759	0.74245	-1.16852	0.345238
	136	-1.96397	0.654129	-0.911333	0.462778
	138	-2.25626	0.826356	-0.665256	0.440868
	140	-1.93505	0.655944	-0.878803	0.582647
	142	-1.98125	0.377126	-1.25034	0.528137
	144	-1.70081	0.465252	-1.13672	0.629802
	146	-1.22216	0.527148	-1.30976	0.732906
	148	-1.7139	0.436698	-1.17769	0.771639
	150	-1.35911	0.46778	-0.980843	0.700033
	152	-1.28589	0.420094	-0.82149	0.49851
	154	-1.1902	0.303338	-0.506099	0.610376
	156	-1.69101	0.431201	-0.294001	0.633026
	158	-1.41696	0.44588	-0.174379	0.424562
	160	-1.65434	0.431738	-0.8141	0.566979
	162	-1.65854	0.422799	-0.569231	0.429474
	164	-1.33488	0.430165	-0.996356	0.311356
	166	-1.28263	0.355701	-0.80566	0.429123
	168	-1.24045	0.392184	-0.475295	0.593631
	170	-1.09471	0.457469	-0.222417	0.56797
	172	-0.855368	0.501461	-0.0313162	0.681269
	174	-1.02145	0.533838	-0.179837	0.850428
	176	-1.07319	0.482513	0.019927	0.900245
	178	-1.14759	0.504663	-0.300622	0.967467
	180	-0.874594	0.55754	-0.408455	0.993638
	182	-0.67909	0.42893	-0.168516	0.849617
	184	1.01156	0.33571	0.284869	0.76535
	186	-0.237565	0.429487	0.225621	0.530126
	188	0.117437	0.506145	0.484687	0.664046
	190	0.240506	0.67052	1.0418	0.696836
	192	-0.442927	0.503009	0.836123	0.882292
	194	-0.731632	0.75078	0.479252	0.774799
	196	-0.153537	0.641961	0.783442	0.919526
	198	0.104584	0.50882	1.03445	0.643514
	200	0.221473	0.432003	0.316193	0.805972
	202	0.530399	0.368821	0.93304	0.838617
	204	0.728403	0.353441	0.955002	0.838256
	206	0.885906	0.391765	1.13124	0.849754
	208	0.861671	0.50671	0.205315	0.655065
	210	0.683397	0.698553	0.384702	0.538874
	212	0.122988	0.824261	0.782427	0.520156
	214	-0.0766539	0.784412	1.35792	0.451119
	216	-0.127707	0.747526	1.75623	0.624862
	218	0.493745	0.548618	1.78161	0.567091
	220	0.940313	0.516987	1.83608	0.504953
	222	0.498956	0.690957	1.56908	0.455735
	224	0.381698	0.647472	1.67597	0.479945
	226	0.0535053	0.563409	0.992614	0.37146
	228	-0.0289693	0.55311	1.04299	0.373753
	230	-0.10668	0.703571	1.12074	0.50599
	232	0.433268	0.348871	0.896301	0.494963
	234	-0.0508875	0.657942	1.41972	0.743445
	236	0.290837	0.447494	1.68145	0.614261
	238	0.308711	0.459323	1.68476	0.620584
	240	0.106426	0.408888	1.5783	0.667692
	242	0.268237	0.437889	1.19167	0.534621
	244	0.514949	0.43861	0.762333	0.464319
	246	0.393762	0.381006	0.846877	0.63709
	248	0.379565	0.43806	1.30722	0.688029
	250	0.432932	0.283139	1.59254	0.837037
	252	-0.00169697	0.186432	1.53416	0.984608
	254	-0.0406875	0.187947	1.05237	0.868944
	256	0.0814751	0.290169	0.80669	0.909891
	258	0.528416	0.359451	0.529964	0.817109
	260	0.396808	0.412711	0.389708	0.819656
	262	0.403546	0.345904	0.706321	0.833802
	264	0.478706	0.335674	1.07751	0.921849
	266	0.44627	0.12722	1.05108	0.836575
	268	0.215788	0.289497	0.788033	1.00399
	270	0.280265	0.229104	0.892127	1.02696
	272	0.122404	0.336957	0.956238	0.810274
	274	0.153025	0.250542	0.77925	0.834426
	276	-0.0945725	0.309244	0.954584	0.753207
	278	0.192653	0.410552	0.957233	0.844787
	280	-0.309164	0.32105	0.849702	0.72481
	282	-0.0961854	0.426109	0.854269	0.718371
	284	-0.146841	0.44036	0.91715	0.754495
	286	-0.339505	0.410843	0.672738	0.696732
	288	-0.758546	0.496986	0.869349	0.560437
	290	-0.585849	0.590807	0.545717	0.403255
	292	-0.333163	0.52678	0.578853	0.454383
	294	-0.278409	0.438554	0.807297	0.592504
	296	-0.0910592	0.332237	1.08826	0.827896
	298	0.120751	0.341186	1.53156	0.825315
	300	0.233558	0.281501	1.67119	0.852507
	302	-0.0288011	0.31722	1.49348	0.711583
	304	0.214637	0.347197	1.37967	0.576193
	306	0.24477	0.360258	1.53545	0.442198
	308	0.185336	0.405977	1.5666	0.502384
	310	-0.0547287	0.325697	1.62257	0.675179
	312	-0.0334951	0.411629	0.671137	0.684202
	314	0.422692	0.41612	0.0791099	0.707989
	316	0.0173072	0.487498	0.248101	0.725331
	318	-0.135798	0.531023	-0.322098	0.490652
	320	-0.385076	0.438094	-0.0369101	0.545546
	322	-0.313879	0.51986	0.81607	0.528733
	324	-0.167207	0.441344	1.61029	0.738328
	326	-0.665442	0.452184	1.69777	0.818664
	328	-0.55189	0.372205	1.40973	0.748538
	330	-0.0744682	0.241224	1.08246	0.722645
	332	0.0455195	0.328663	1.06252	0.680309
	334	0.184016	0.383514	1.27744	0.678664
	336	0.90953	0.330986	1.13545	0.675601
	338	0.42865	0.517485	1.16546	0.691911
	340	0.730264	0.535082	1.41388	0.887345
	342	0.224558	0.534457	1.75954	0.792765
	344	-0.0978544	0.444534	1.27501	0.6546
	346	-0.305015	0.452298	1.07897	0.497885
	348	-0.43638	0.363123	0.917156	0.470192
	350	-0.532399	0.38305	0.987442	0.591422
	352	-0.478168	0.204525	0.60144	0.4724
	354	0.07011	0.544254	0.376635	0.476095
	356	0.623875	0.510345	0.515016	0.515045
	358	0.438059	0.606164	0.51118	0.380609
	360	0.394218	0.478313	0.887821	0.355927
	362	-0.011022	0.453353	0.812784	0.285093
	364	-0.0436009	0.407923	1.52958	0.599469
	366	-0.105537	0.445491	1.29909	0.529513
	368	0.145841	0.38115	1.36865	0.610234
	370	0.668784	0.564136	1.09914	0.651085
	372	0.523153	0.664677	0.595823	0.706427
	374	0.850187	0.609523	0.377373	0.743486
	376	0.762551	0.624436	0.844855	0.659826
	378	0.394362	0.498643	1.10992	0.673727
	380	0.0395476	0.66433	0.996986	0.483701
	382	-0.486623	0.625557	1.41536	0.700626
	384	-0.851704	0.503618	0.841969	0.449843
	386	-0.573051	0.568823	0.626728	0.496516
	388	-1.17638	0.456996	0.290017	0.468088
	390	-1.32358	0.506282	0.467383	0.526386
	392	-1.35582	0.511383	0.5039	0.452788
	394	-1.14499	0.697629	0.289488	0.418174
	396	-0.431805	0.736672	0.332541	0.300326
	398	-0.581269	0.814407	0.412909	0.328223
	400	0.00215142	0.586821	-0.0512107	0.311778
	402	0.200537	0.405198	0.418752	0.424258
	404	0.192622	0.414877	0.168664	0.345776
	406	-0.286284	0.532222	-0.0305779	0.356391
	408	-0.378518	0.422371	-0.389235	0.40925
	410	-0.385338	0.508772	-0.168601	0.292005
	412	-0.671498	0.623983	-0.049554	0.415014
	414	-0.822012	0.588884	0.304344	0.566232
	416	-0.727504	0.535954	0.386997	0.482987
	418	-0.693536	0.392058	0.227599	0.509444
	420	-0.690092	0.349598	0.366382	0.575992
	422	-0.787735	0.429264	0.431801	0.513616
	424	-0.340215	0.413867	0.207782	0.565797
	426	-0.515155	0.518682	0.432874	0.723299
	428	-0.25431	0.430129	0.446518	0.85169
	430	-0.105887	0.3898	0.595976	0.978231
	432	-0.056057	0.43079	0.385755	1.04878
	434	0.226785	0.578211	0.509231	0.989386
	436	0.121304	0.611475	0.632331	0.987634
	438	-0.257491	0.539881	0.488426	0.447551
	440	-0.283446	0.482955	0.447929	0.429779
	442	-0.460583	0.430469	0.373255	0.428422
	444	-0.25179	0.478017	0.157511	0.431592
	446	-0.28016	0.408589	0.624147	0.41563
	448	-0.0288549	0.424814	0.417155	0.512571
	450	-0.469417	0.41297	0.535248	0.481641
	452	0.362104	0.386545	0.0820628	0.501172
	454	0.238353	0.322121	-0.0218127	0.508082
	456	-0.0776362	0.371294	-0.329024	0.560001
	458	-0.523785	0.410377	-0.128664	0.554054
	460	-0.893208	0.300429	-0.0321406	0.549535
	462	-0.917112	0.287162	0.00684807	0.610997
	464	-0.217478	0.301337	0.0142842	0.591267
	466	-0.357747	0.371957	-0.189973	0.464669
	468	-0.351652	0.332672	-0.252637	0.283264
	470	-0.0739437	0.219554	-0.0545379	0.506133
	472	-0.0297692	0.206015	0.485049	0.486022
	474	-0.00667536	0.220736	0.157865	0.542124
	476	0.209675	0.266756	0.155577	0.534098
	478	0.0443115	0.292212	0.52809	0.329143
	480	0.141324	0.290556	-0.221905	0.353636
	482	-0.135238	0.204716	-0.261586	0.359487
	484	0.256695	0.474071	0.019614	0.623379
	486	0.401068	0.323857	-0.610061	0.634536
	488	0.677524	0.260279	0.622395	0.374311
	490	0.926857	0.176184	0.50984	0.26686
	492	0.94059	0.257469	0.0328492	0.448626
	494	0.807123	0.270097	0.341135	0.530018
	496	0.863124	0.413651	0.054862	0.847755
	498	0.416185	0.428983	0.0885521	0.762454
	500	-0.316178	0.479587	0.21183	0.796902
	502	-0.476629	0.436286	-0.0228026	0.580218
	504	-0.620315	0.315616	0.265859	0.476792
	506	-1.05635	0.262005	0.723194	0.302663
	508	-0.897708	0.342196	0.295936	0.228511
	510	-0.822121	0.442181	0.533376	0.312415
	512	-0.483758	0.415528	0.498033	0.210092
	514	-0.188953	0.332094	-0.0935333	0.385913
	516	-0.338348	0.359959	-0.0356483	0.281675
	518	-0.214085	0.427144	-0.572433	0.355205
	520	-0.192292	0.472075	-0.895368	0.479793
	522	-0.130188	0.336849	-0.96414	0.457708
	524	-0.30542	0.346597	-0.377957	0.510718
	526	-0.20973	0.318498	-0.196664	0.498539
	528	-0.205977	0.454508	-0.147163	0.4702
	530	0.0323113	0.303925	0.0363226	0.362965
	532	-0.349484	0.319428	-0.0344964	0.386244
	534	-0.32739	0.299908	-0.273163	0.642611
	536	-0.391809	0.423949	-0.325897	0.640629
	538	-0.462234	0.261743	0.144754	0.593096
	540	-0.192043	0.232133	0.177833	0.687798
	542	0.0337856	0.313649	0.045396	0.547371
	544	0.277691	0.428119	-0.438323	0.5232
	546	0.154605	0.392903	-0.248681	0.480477
	548	0.00693048	0.376234	-0.0715451	0.532468
	550	-0.231184	0.417783	-0.514461	0.514339
	552	-0.0228126	0.290436	-0.149609	0.567948
	554	-0.720506	0.401415	-0.321967	0.498843
	556	-0.793808	0.332603	-0.133447	0.518584
	558	-0.35576	0.343528	0.115052	0.5626
	560	-0.129702	0.388141	0.541476	0.850809
	562	-0.618331	0.321219	0.51695	0.782863
	564	0.0293211	0.311954	0.590943	0.916198
	566	0.286148	0.467968	0.499479	0.956901
	568	-0.341848	0.23095	-0.214293	0.543113
	570	-0.136126	0.347244	0.094854	0.555427
	572	-0.256956	0.44014	0.217854	0.498972
	574	-0.474944	0.514312	0.341952	0.690321
	576	-0.707482	0.497059	-0.489477	0.817588
	578	-0.482557	0.485241	-0.247597	0.831112
	580	-0.434831	0.468052	-0.178046	0.935001
	582	0.137238	0.393605	-0.433089	0.682138
	584	0.0574323	0.345844	-0.469803	0.598439
	586	0.209475	0.415532	0.0726866	0.33871
	588	0.2946	0.426431	0.48294	0.412276
	590	0.368943	0.419135	0.20776	0.405519
	592	0.50938	0.400869	-0.440715	0.36124
	594	0.227041	0.426158	-0.530518	0.430568
	596	0.154536	0.339827	-0.659589	0.40402
	598	0.0613833	0.303901	-0.23155	0.458244
	600	-0.0654313	0.263175	-0.539329	0.497168
	602	-0.644811	0.161824	-0.567468	0.45311
	604	-0.554749	0.19026	-0.669643	0.47243
	606	-0.362022	0.422078	-0.772644	0.520468
	608	-0.22506	0.41632	-0.404957	0.399942
	610	-0.719124	0.481109	0.0296113	0.448269
	612	-0.602271	0.379696	0.288219	0.458595
	614	-0.385737	0.316158	0.350849	0.263669
	616	-0.467285	0.111212	0.722156	0.23042
	618	-0.627333	0.17991	0.40645	0.338585
	620	-0.253463	0.290328	0.825063	0.279615
	622	-0.529799	0.283634	0.0161089	0.338744
	624	-0.384589	0.325994	0.607915	0.327271
	626	-0.454771	0.323443	0.790923	0.345331
	628	-0.0742968	0.267125	0.721765	0.504015
	630	-0.364259	0.258672	0.171918	0.454631
	632	-0.375276	0.271119	-0.299321	0.734911
	634	-0.342543	0.273341	-0.475591	0.732753
	636	-0.496928	0.379269	-0.0691877	0.445491
	638	-0.449749	0.444875	0.372851	0.556632
	640	0.122336	0.539731	0.34401	0.528356
	642	0.0988024	0.457364	-0.150199	0.510245
	644	0.327833	0.465158	-0.234403	0.501522
	646	0.536866	0.472129	-0.864211	0.567982
	648	0.258857	0.483839	-1.08374	0.559077
	650	0.041012	0.369134	-0.93377	0.527453
	652	-0.403775	0.344914	-0.673198	0.459136
	654	0.0239642	0.270412	-0.458746	0.37946
	656	-0.420361	0.617451	0.00387416	0.339355
	658	-0.0774266	0.367489	-0.0066339	0.287584
	660	0.0975752	0.386914	0.0615954	0.360909
	662	-0.05321	0.366803	-0.343471	0.272367
	664	-0.140235	0.265871	0.0832354	0.422303
	666	-0.294606	0.382761	0.153371	0.452359
	668	-0.0620853	0.386535	0.0477804	0.455756
	670	-0.0094151	0.376042	0.275704	0.352135
	672	0.436627	0.463707	0.0216711	0.350403
	674	0.749472	0.418506	0.319936	0.518784
	676	0.563858	0.439508	0.0951254	0.472563
	678	0.5771	0.231784	0.0250282	0.575502
	680	0.512336	0.253107	-0.0116397	0.494766
	682	0.214574	0.437998	0.785319	0.882031
	684	0.285894	0.54542	-0.134006	0.351877
	686	0.244224	0.422097	-0.0975388	0.145916
	688	0.436458	0.407032	-0.228957	0.379967
	690	0.0267524	0.504598	-0.366024	0.375392
	692	0.318317	0.314741	-0.34386	0.422094
	694	0.312586	0.414688	-0.236123	0.419191
	696	0.158394	0.359482	-0.352888	0.482325
	698	0.117066	0.374343	-0.291074	0.292973
	700	0.312931	0.415124	-0.185556	0.369232
	702	-0.0415909	0.43157	-0.212267	0.612706
	704	0.339464	0.511843	-0.159267	0.623322
	706	0.898577	0.439675	-0.392909	0.697564
	708	0.225025	0.343613	-0.272194	0.579188
	710	0.968418	0.444255	0.113653	0.361283
	712	0.969717	0.389672	0.0220543	0.336813
	714	0.819029	0.347325	-0.404845	0.130832
	716	0.308623	0.303588	0.189943	0.283654
	718	0.105844	0.389032	0.189216	0.418476
	720	0.273254	0.392492	0.537149	0.52739
	722	0.412708	0.347138	1.06486	0.396933
	724	0.590951	0.236337	1.03732	0.403973
	726	0.534764	0.409491	0.654206	0.608504
	728	0.436419	0.367659	0.515475	0.686022
	730	0.574434	0.334073	-0.46795	0.396729
	732	0.580806	0.358175	-0.306438	0.54395
	734	-0.306988	0.295875	-0.127886	0.532364
	736	-0.378843	0.32359	0.366484	0.565858
	738	-0.0950134	0.42211	0.0590473	0.579877
	740	0.216986	0.500054	-0.311233	0.501489
	742	0.499238	0.397432	-0.49692	0.36947
	744	0.378998	0.475875	-0.208226	0.240296
	746	0.692423	0.486698	-0.125467	0.25578
	748	0.443253	0.306216	0.0256388	0.26501
	750	0.287122	0.316103	0.0963906	0.298871
	752	0.160105	0.262077	0.0323504	0.295337
	754	0.196675	0.161104	0.0684118	0.194991
	756	0.404247	0.226843	-0.268272	0.27117
	758	0.401491	0.235169	-0.412221	0.310946
	760	0.770287	0.368372	-0.750384	0.670427
	762	0.567094	0.428713	-0.556476	0.495448
	764	0.279822	0.423535	-1.01089	0.480734
	766	0.251729	0.466121	-0.576955	0.560267
	768	0.112685	0.52647	-0.788387	0.610821
	770	-0.374998	0.452167	-0.614172	0.580755
	772	-0.306075	0.415356	-0.208437	0.543418
	774	-0.659265	0.253366	0.630712	0.671692
	776	-0.794643	0.28604	0.297237	0.67999
	778	-0.782211	0.295683	0.625088	0.464166
	780	-0.514595	0.52822	0.195838	0.476334
	782	0.00103623	0.414285	0.606796	0.269595
	784	-0.19842	0.356979	0.419239	0.376424
	786	-0.193285	0.560069	0.357148	0.399148
	788	-0.0993129	0.591903	0.575146	0.376629
	790	-0.235578	0.617419	0.0961747	0.380625
	792	0.0106112	0.455971	-0.160459	0.275094
	794	-0.0649304	0.459583	-0.171465	0.306725
	796	0.113953	0.359918	-0.135471	0.259821
	798	0.388135	0.367627	-0.39389	0.29298
	800	0.538366	0.456888	0.0662	0.386843
	802	0.611554	0.423149	-0.135154	0.437378
	804	0.397653	0.40347	-0.62922	0.323309
	806	-0.0800435	0.331356	-0.512861	0.375669
	808	0.172408	0.465512	-0.327137	0.295206
	810	0.159315	0.509455	-0.357564	0.390064
	812	0.420931	0.516429	0.0875245	0.573843
	814	0.320085	0.60647	0.0960554	0.360635
	816	0.737284	0.445836	0.231679	0.342971
	818	0.144527	0.453478	0.0730936	0.362798
	820	0.0181187	0.428383	-0.157911	0.57483
	822	0.0830484	0.456397	-0.119715	0.458531
	824	-0.443718	0.446995	-0.0209601	0.702008
	826	0.180287	0.223167	-0.0379335	0.654983
	828	0.266528	0.245154	0.0832587	0.664665
	830	0.158088	0.298857	0.335257	0.386378
	832	0.0610829	0.404468	0.439539	0.401048
	834	0.264162	0.257976	0.189416	0.348136
	836	0.60781	0.313004	0.314702	0.277463
	838	0.713117	0.470571	0.369369	0.34997
	840	0.649825	0.483229	0.151221	0.455781
	842	0.557166	0.488219	0.404039	0.429594
	844	0.386049	0.467608	0.276242	0.64073
	846	0.180004	0.484811	0.0858224	0.541611
	848	-0.109053	0.455292	0.546931	0.39245
	850	0.0535894	0.387867	1.21136	0.544221
	852	0.290288	0.244238	1.15572	0.53945
	854	0.185264	0.246988	1.06598	0.519783
	856	0.134296	0.430291	1.03879	0.539279
	858	-0.203046	0.371305	0.686619	0.497537
	860	0.164913	0.403389	0.705761	0.412266
	862	0.141409	0.44443	-0.144177	0.554696
	864	-0.0226038	0.422781	0.441469	0.428989
	866	-0.0111236	0.398984	0.101461	0.568069
	868	0.219722	0.432857	0.214745	0.593656
	870	0.128646	0.276747	-0.0838934	0.529176
	872	0.0408778	0.36868	0.10803	0.530869
	874	-0.167413	0.380826	-0.414937	0.678374
	876	-0.580067	0.222254	-0.0603546	0.432355
	878	-0.490125	0.208637	-0.477841	0.738592
	880	-0.0233337	0.217739	-0.278023	0.651152
	882	-0.571359	0.375806	-0.320444	0.703663
	884	-0.207757	0.277247	0.244489	0.538055
	886	-0.0864223	0.232541	-0.418554	0.587121
	888	-0.287828	0.284857	-0.00489911	0.4541
	890	-0.434529	0.262416	0.244043	0.638213
	892	0.175398	0.498185	-0.48426	0.473992
	894	-0.135929	0.571837	-1.66202	0.674519
	896	-0.0633177	0.581971	-1.28428	0.403489
	898	0.320051	0.451413	-1.47351	0.451165
	900	-0.0014126	0.408131	-1.27215	0.340534
	902	0.104297	0.348802	-1.06354	0.1453
	904	-0.252646	0.368012	-0.845438	0.242127
	906	-0.162809	0.340866	-0.224164	0.364994
	908	-0.333076	0.415523	-0.333264	0.325846
	910	0.233935	0.334547	-0.172811	0.352773
	912	0.392913	0.556299	-0.0943852	0.495321
	914	0.261475	0.548535	-0.153966	0.548319
	916	0.251728	0.449461	0.35431	0.541221
	918	0.27111	0.349716	-0.0114737	0.670665
	920	0.214062	0.381746	-0.0146646	0.594847
	922	0.0826602	0.455116	0.0287866	0.565574
	924	-0.124536	0.451093	-0.42348	0.426561
	926	-0.0317354	0.427137	-0.428945	0.680744
	928	0.227094	0.387051	-0.426473	0.697957
	930	0.454469	0.502032	-0.686131	0.599968
	932	0.708851	0.30817	-0.235419	0.705501
	934	0.877998	0.364356	-0.0492516	0.726091
	936	0.387833	0.554685	-0.00347242	0.589671
	938	0.361651	0.406672	0.440683	0.683554
	940	0.588408	0.336404	-0.153356	0.653775
	942	0.446829	0.380313	-0.206906	0.560372
	944	0.381182	0.501609	-0.12149	0.395157
	946	0.294034	0.405705	0.523091	0.260776
	948	0.303584	0.444179	0.563307	0.334671
	950	0.554557	0.371714	0.832395	0.437604
	952	-0.109226	0.43317	0.81602	0.435854
	954	0.0483643	0.474257	0.746073	0.500156
	956	-0.188561	0.448656	0.00353229	0.464707
	958	-1.74225	0.356211	-1.64236	0.313629
