# Supplementary material for: PKCδ is an activator of neuronal mitochondrial metabolism that mediates the spacing effect on memory consolidation
Source: eLife. 2024 Oct 30;13:RP92085. doi: 10.7554/eLife.92085 (PMC11524582; doi:10.7554/eLife.92085)
Supplement: Figure 6—figure supplement 1—source data 1. [file elife-92085-fig6-figsupp1-data1.xlsx]

## Sheet: Fig.S6a
	Time traces						Slope
		Control (unpaired)		1x			Control (unpaired)	1x
	Time (s)	Mean	SEM	Mean	SEM		0.72837	0.80497
	0	-0.178317	0.204947	0.140314	0.0848727		0.52071	0.602675
	0.5	-0.254331	0.276469	0.370169	0.205426		0.85564	0.58223
	1	-0.322584	0.310231	0.530872	0.237678		0.79659	1.2278
	1.5	0.0358383	0.269196	0.415855	0.298869		1.05598	0.798005
	2	0.0816626	0.205103	0.449856	0.359975		0.927555	0.81873
	2.5	0.107021	0.241148	0.270884	0.332507		1.10328	0.737075
	3	0.0911415	0.331424	0.322253	0.341136		1.3181	0.7099
	3.5	0.0632199	0.309811	0.373113	0.431403		0.61181
	4	0.126574	0.320139	0.547044	0.398738
	4.5	-0.0857316	0.331643	0.548437	0.338953
	5	0.00119403	0.363588	0.698691	0.37539
	5.5	-0.347623	0.346775	0.195638	0.391031
	6	0.138873	0.37808	0.267958	0.468897
	6.5	-0.0812376	0.436318	0.192264	0.461854
	7	0.125598	0.354076	0.0675162	0.449138
	7.5	0.205806	0.358101	0.301338	0.453777
	8	0.135984	0.361687	0.57447	0.375643
	8.5	-0.240203	0.352944	0.212635	0.243975
	9	-0.0558514	0.344088	-0.215244	0.310878
	9.5	-0.111145	0.215744	-0.127918	0.295151
	10	-0.133259	0.212319	-0.568124	0.420385
	10.5	-0.0511208	0.210804	-0.301066	0.276561
	11	0.214065	0.248527	-0.244253	0.188115
	11.5	0.115482	0.324719	-0.00908569	0.216395
	12	-0.0572189	0.34114	0.171375	0.194334
	12.5	-0.110682	0.348115	0.0531209	0.191712
	13	0.0245374	0.318805	-0.0737544	0.244682
	13.5	0.254981	0.31625	0.00980983	0.316292
	14	0.149308	0.400647	-0.123029	0.313499
	14.5	0.213432	0.382943	0.283386	0.274534
	15	0.368633	0.348937	0.819116	0.481507
	15.5	0.573461	0.282145	0.718182	0.520995
	16	0.411839	0.268161	0.895282	0.576142
	16.5	0.129843	0.247181	0.779104	0.520088
	17	0.148312	0.208315	1.03639	0.580874
	17.5	0.234855	0.179059	0.860731	0.440762
	18	0.0490706	0.164138	0.224761	0.276015
	18.5	0.0680735	0.212508	0.160934	0.237043
	19	0.331924	0.277275	0.226809	0.257144
	19.5	0.215193	0.354412	0.241086	0.205954
	20	0.181041	0.372377	0.202	0.247549
	20.5	0.219866	0.380783	0.250377	0.209246
	21	0.169195	0.358371	0.276134	0.285917
	21.5	0.0238978	0.319438	0.2426	0.239849
	22	0.534218	0.340947	0.413303	0.234681
	22.5	0.358139	0.342185	0.512843	0.192718
	23	0.285487	0.277244	0.670113	0.254173
	23.5	0.148822	0.41461	0.178799	0.183107
	24	0.0960117	0.359504	0.182475	0.318133
	24.5	-0.0654058	0.38696	-0.260589	0.260686
	25	-0.213773	0.400128	-0.0552699	0.356063
	25.5	-0.111173	0.33942	-0.241573	0.308132
	26	-0.143806	0.328874	-0.306527	0.248227
	26.5	-0.187814	0.284483	-0.48128	0.184441
	27	-0.415235	0.224218	-0.407385	0.228238
	27.5	-0.471508	0.20294	-0.449394	0.204128
	28	-0.227209	0.273954	-0.571313	0.300854
	28.5	-0.185943	0.270482	-0.323534	0.380112
	29	-0.228466	0.279588	0.0199144	0.256447
	29.5	-0.14507	0.221884	-0.248747	0.429368
	30	0.0178423	0.205489	0.000520971	0.291446
	30.5	0.0857277	0.238149	-0.126514	0.264238
	31	-0.113212	0.288072	-0.612517	0.408526
	31.5	-0.150693	0.354607	-0.584364	0.356685
	32	0.068135	0.344514	-0.484782	0.284351
	32.5	0.0648497	0.318042	-0.462908	0.293787
	33	0.207218	0.33821	-0.256369	0.210518
	33.5	-0.0306713	0.226007	-0.126967	0.251329
	34	-0.0208164	0.261085	0.20831	0.46342
	34.5	0.09592	0.35357	0.168425	0.496083
	35	-0.182213	0.331257	0.155315	0.557171
	35.5	-0.077712	0.397319	0.160721	0.560917
	36	-0.328636	0.264415	-0.0363228	0.597943
	36.5	-0.0465868	0.232809	-0.544094	0.148505
	37	-0.00714232	0.213746	-0.56672	0.150928
	37.5	-0.100525	0.16994	-0.281683	0.349825
	38	-0.0399115	0.183963	-0.37931	0.261644
	38.5	-0.326281	0.258809	0.0826073	0.286629
	39	-0.309088	0.294406	-0.0572475	0.341757
	39.5	-0.356813	0.175427	0.0302389	0.286326
	40	-0.594392	0.242283	-0.420403	0.430827
	40.5	-0.229798	0.204355	-0.560159	0.315493
	41	-0.00261252	0.205719	-0.881838	0.398877
	41.5	0.315118	0.315238	-0.686943	0.363767
	42	0.130907	0.335442	-0.939721	0.293971
	42.5	0.136567	0.306073	-0.77956	0.30653
	43	0.204649	0.246071	-0.257406	0.210727
	43.5	0.262565	0.293048	0.00149886	0.224058
	44	0.208616	0.35389	-0.280554	0.230223
	44.5	-0.0487953	0.187096	-0.331	0.294904
	45	-0.0649092	0.255036	-0.476394	0.284453
	45.5	0.162897	0.351661	-0.712436	0.308914
	46	0.155447	0.315562	-0.53566	0.330111
	46.5	-0.0522785	0.230123	-0.388352	0.383568
	47	-0.0400402	0.235162	-0.396436	0.31121
	47.5	0.0147567	0.283479	-0.0864702	0.344176
	48	-0.195418	0.255349	-0.202301	0.351847
	48.5	-0.416863	0.248851	-0.32377	0.41961
	49	-0.680394	0.26643	-0.310032	0.425745
	49.5	-0.598558	0.188337	-0.369491	0.563428
	50	-0.518323	0.201308	-0.574051	0.577189
	50.5	-0.586691	0.200548	-0.697623	0.480577
	51	-0.589016	0.213477	-0.45909	0.328261
	51.5	-0.368937	0.318308	-0.316008	0.412464
	52	-0.301425	0.216693	0.169437	0.486879
	52.5	-0.399727	0.317583	0.00914861	0.332896
	53	-0.223465	0.315886	-0.255462	0.437273
	53.5	0.37624	0.460616	-0.848877	0.684813
	54	0.299765	0.408027	-0.698161	0.599755
	54.5	-0.30706	0.509979	-1.37646	0.805594
	55	-0.681145	0.701884	-0.5807	0.63554
	55.5	-1.23004	0.817521	-0.865352	0.43085
	56	-1.62252	0.705588	-0.944853	0.283041
	56.5	-0.681766	0.831946	-0.869268	0.425853
	57	-0.487463	0.808489	-1.05648	0.425161
	57.5	-0.673947	0.70618	-1.51467	0.415483
	58	-0.631521	0.569211	-1.85783	0.464987
	58.5	-0.000445398	0.602054	-2.08987	0.684207
	59	-0.453794	0.815651	-1.37233	0.888544
	59.5	-0.446121	0.779971	-0.526542	0.713467
	60	0.292729	0.564396	0.0618706	0.808864
	60.5	0.229948	0.579833	0.0958135	0.62145
	61	0.07528	0.466145	0.408019	0.640288
	61.5	0.321129	0.406731	0.781819	0.354286
	62	0.645435	0.508823	0.655629	0.53099
	62.5	0.854923	0.594704	1.16433	0.567277
	63	1.20644	0.907009	1.43302	0.675519
	63.5	1.55767	0.919498	1.25304	0.558983
	64	2.03309	0.795484	1.91	0.551882
	64.5	1.97456	0.613155	2.50851	0.654982
	65	2.10837	0.625876	2.6553	0.637248
	65.5	2.16104	0.660882	3.00859	0.750528
	66	2.11076	0.570247	3.2162	0.759847
	66.5	2.25238	0.666109	3.56469	0.890535
	67	2.38395	0.673649	3.51958	0.852764
	67.5	2.29347	0.682117	3.66935	0.988217
	68	2.84183	0.763885	3.47948	1.03159
	68.5	2.8611	0.788977	3.66291	1.09168
	69	2.83084	0.752608	4.12525	1.0143
	69.5	2.80697	0.792301	3.9886	1.00713
	70	3.2339	0.862245	4.12005	0.980348
	70.5	3.14842	0.871723	4.51066	1.14499
	71	3.28958	0.876499	4.87637	1.32144
	71.5	3.44678	0.928279	5.03212	1.35082
	72	3.92772	1.0641	5.41479	1.41246
	72.5	3.83804	0.983887	5.70541	1.45005
	73	4.31515	1.01661	6.16486	1.39954
	73.5	4.69488	1.02029	6.35119	1.44688
	74	4.94209	0.917028	6.66975	1.56129
	74.5	5.36642	0.992175	6.83156	1.65532
	75	5.57412	0.972006	6.96759	1.73713
	75.5	5.91791	1.06239	7.15828	1.77977
	76	6.60736	1.0538	7.40601	1.72753
	76.5	7.02218	1.16425	7.55045	1.62181
	77	7.20414	1.4245	8.22324	1.6998
	77.5	7.66658	1.46942	8.4999	1.74398
	78	7.84395	1.49352	8.59251	1.77178
	78.5	8.33601	1.63196	9.39955	1.73074
	79	8.69507	1.61074	9.62924	1.78724
	79.5	9.32197	1.6742	10.1857	1.80877
	80	9.81782	1.79225	10.8579	1.55288
	80.5	10.1552	1.83668	11.6632	1.69777
	81	10.5366	1.92471	11.6387	1.58514
	81.5	10.693	1.90253	12.6082	1.81077
	82	11.2035	1.90565	12.7193	1.84215
	82.5	11.4365	1.82685	12.9954	1.74529
	83	11.6106	1.80321	12.963	1.59066
	83.5	12.0584	1.73821	13.6192	1.74048
	84	12.2952	1.94462	13.9234	1.61077
	84.5	12.983	1.93364	13.9216	1.52476
	85	13.3069	1.97747	14.3417	1.53545
	85.5	13.4401	1.93093	15.0579	1.62912
	86	13.7653	2.07369	14.8662	1.50487
	86.5	14.0933	2.02767	15.5477	1.59686
	87	14.4811	2.14197	15.9392	1.4724
	87.5	14.6152	2.22395	16.0281	1.45331
	88	15.0168	2.1547	16.2078	1.46182
	88.5	14.9491	2.13629	16.8334	1.37635
	89	15.2442	2.24448	16.8611	1.42822
	89.5	15.6715	2.41099	17.1909	1.46379
	90	16.0203	2.30479	17.4672	1.46662
	90.5	15.7482	2.53644	17.7913	1.43522
	91	15.5959	2.42771	17.6596	1.58601
	91.5	15.5542	2.42121	17.9199	1.5961
	92	15.7923	2.24871	18.1574	1.47514
	92.5	15.5195	2.37394	18.3601	1.66448
	93	15.8736	2.39076	18.4856	1.65206
	93.5	16.0575	2.38708	19.2779	1.41465
	94	16.1434	2.18029	19.4121	1.5259
	94.5	16.5388	2.14754	19.7306	1.52662
	95	16.7245	2.13598	19.7166	1.44195
	95.5	16.9703	1.894	19.9236	1.36299
	96	16.9636	1.97982	19.978	1.51388
	96.5	17.1834	1.96761	20.0346	1.40927
	97	17.1361	1.88912	20.6811	1.58754
	97.5	17.0339	1.90021	20.9205	1.66234
	98	16.9164	1.8907	20.8681	1.5267
	98.5	17.1035	1.85491	21.0918	1.51901
	99	17.9371	1.64275	20.7257	1.47268
	99.5	18.0508	1.74837	20.7983	1.36555
	100	18.1634	1.74762	20.8492	1.53912
	100.5	18.2668	1.73729	20.781	1.58968
	101	18.1562	1.58594	20.791	1.5951
	101.5	18.2587	1.62621	20.7564	1.524
	102	18.1745	1.48677	21.0515	1.62207
	102.5	18.2033	1.47896	21.251	1.53481
	103	18.1193	1.44686	21.1135	1.72671
	103.5	18.1761	1.41819	21.2931	1.70485
	104	18.0727	1.41456	21.1717	1.59282
	104.5	18.2111	1.36331	21.2849	1.57708
	105	18.6723	1.50399	21.1016	1.54824
	105.5	18.5009	1.47783	21.3283	1.39774
	106	18.76	1.55679	21.4325	1.39573
	106.5	18.7945	1.59184	21.4505	1.32938
	107	18.7041	1.50018	21.3763	1.43898
	107.5	18.6174	1.49088	21.3499	1.42457
	108	18.9172	1.36651	21.397	1.39301
	108.5	18.9924	1.41084	21.3302	1.38333
	109	18.5721	1.41189	21.2378	1.40668
	109.5	18.894	1.35671	20.847	1.45782
	110	18.5313	1.44975	21.0417	1.37193
	110.5	18.5442	1.26421	20.9057	1.3023
	111	18.3271	1.07464	21.0995	1.27306
	111.5	18.5281	1.16659	21.0125	1.21064
	112	18.2034	1.11547	21.1051	1.08935
	112.5	18.543	1.05275	21.113	1.11612
	113	18.8978	1.10297	21.2442	1.09328
	113.5	18.9379	1.17451	21.4244	1.13697
	114	19.1407	1.12213	21.2882	1.14958
	114.5	19.2062	1.10302	21.526	1.20859
	115	18.761	1.09552	21.5739	1.17466
	115.5	19.0769	0.842556	21.4957	1.27542
	116	19.2881	0.984406	21.3522	1.30392
	116.5	19.5132	1.10107	21.594	1.26124
	117	19.1899	1.21988	21.5043	1.50903
	117.5	19.3574	1.23811	21.3341	1.56124
	118	19.3554	1.19621	21.5173	1.43891
	118.5	19.5129	1.22133	21.6403	1.44826
	119	19.5029	1.19959	21.4228	1.43588
	119.5	19.3945	1.22533	21.1213	1.40011
	120	19.2979	1.2215	21.183	1.49301
	120.5	19.3545	1.30525	21.1474	1.41454
	121	19.2186	1.27924	21.4736	1.41689
	121.5	19.1768	1.30207	21.492	1.42568
	122	18.8706	1.37175	21.4626	1.39317
	122.5	19.0234	1.10278	21.5903	1.4207
	123	19.2169	1.05512	21.5997	1.42672
	123.5	19.0401	1.21949	21.5649	1.55526
	124	19.4204	1.09392	21.5289	1.5432
	124.5	19.5206	1.10621	21.7746	1.47427
	125	19.7363	1.1903	21.7709	1.47966
	125.5	19.4344	1.22675	21.6522	1.40857
	126	19.2548	1.21167	21.4348	1.43459
	126.5	18.7546	1.0391	21.5675	1.37382
	127	18.9942	0.977311	21.6236	1.41006
	127.5	18.9701	0.980356	21.4339	1.43634
	128	18.936	0.975404	21.0083	1.41105
	128.5	19.1716	1.07144	21.388	1.32726
	129	18.9771	1.17335	21.2791	1.42788
	129.5	18.8496	1.14917	21.1634	1.37203
	130	18.863	1.099	21.2672	1.3775
	130.5	18.9164	1.0129	21.2133	1.21469
	131	19.0557	1.00897	21.3467	1.21046
	131.5	18.9352	1.03026	21.3327	1.18055
	132	18.8258	1.12496	21.4597	1.25436
	132.5	19.2152	1.13859	21.5594	1.15029
	133	19.6015	1.07143	21.7333	1.29459
	133.5	19.1434	1.21014	21.575	1.12849
	134	19.0002	1.19713	21.7133	1.07658
	134.5	19.2718	1.21936	21.7568	1.06699
	135	19.2752	1.18461	21.6244	1.20495
	135.5	19.0312	1.07826	21.5608	1.15046
	136	19.2046	1.09167	21.4112	1.20424
	136.5	19.289	1.14659	21.333	1.31679
	137	19.4804	1.35873	21.1915	1.33082
	137.5	19.3393	1.23077	21.2623	1.25319
	138	19.3007	1.47762	21.3826	1.25198
	138.5	19.2961	1.54482	21.1993	1.2795
	139	19.1177	1.47647	21.1236	1.14805
	139.5	18.786	1.34248	20.8506	1.21513
	140	18.9203	1.38364	20.7982	1.22091
	140.5	18.9326	1.27075	20.8687	1.29171
	141	18.9614	1.13564	21.0103	1.30292
	141.5	18.9904	1.25538	21.1189	1.32155
	142	19.1183	1.21314	20.9153	1.28746
	142.5	18.8962	1.15866	21.0203	1.22622
	143	18.7711	1.08593	20.7596	1.15667
	143.5	18.6931	1.10438	20.6749	1.11982
	144	18.7535	1.08749	20.6297	1.15101
	144.5	18.5164	1.05355	20.8988	1.14407
	145	18.7356	1.01508	20.8605	1.09857
	145.5	19.0186	1.02484	21.3898	1.07764
	146	18.8712	1.04857	21.8611	1.35108
	146.5	18.721	1.02907	21.8199	1.36919
	147	18.9386	1.089	21.7352	1.29644
	147.5	18.7406	1.14979	21.9693	1.44492
	148	18.6438	1.21857	21.3914	1.34772
	148.5	18.7974	1.23698	21.2829	1.29679
	149	19.1151	1.27644	21.4083	1.17422
	149.5	18.8079	1.23681	21.4863	1.28231
	150	18.9746	1.25208	21.3793	1.2737
	150.5	18.9911	1.17962	21.1627	1.36936
	151	18.6326	1.18958	21.0244	1.32597
	151.5	18.3904	0.992501	21.0132	1.32615
	152	18.7262	1.01877	21.1134	1.23324
	152.5	18.4495	1.00111	21.0329	1.32778
	153	18.4572	1.08998	21.1215	1.31277
	153.5	18.8911	1.05477	21.4239	1.41739
	154	18.9226	1.12667	21.2667	1.34918
	154.5	18.7385	1.11455	21.2963	1.32748
	155	18.7965	1.12611	21.3052	1.28029
	155.5	18.5913	1.12162	21.4583	1.35511
	156	18.9203	1.14594	21.8371	1.35122
	156.5	19.0617	1.26627	21.8472	1.37321
	157	19.1127	1.16562	21.6821	1.37966
	157.5	18.7424	1.17398	21.585	1.45311
	158	18.955	1.12951	21.5833	1.43103
	158.5	18.8271	1.21446	21.5605	1.40708
	159	18.5574	1.079	21.4106	1.3904
	159.5	18.4724	1.06101	21.4874	1.46466
	160	18.6641	1.17541	21.5154	1.29381
	160.5	18.5391	1.09738	21.4728	1.27543
	161	18.8097	1.05424	21.4272	1.28717
	161.5	18.8535	1.03254	21.2714	1.3695
	162	18.6106	1.10388	21.1457	1.31442
	162.5	18.3923	1.1365	20.9371	1.43513
	163	18.5385	1.17209	20.9562	1.32119
	163.5	18.7944	1.19607	21.3696	1.39259
	164	18.746	1.24356	21.3955	1.42275
	164.5	18.9634	1.27755	21.3615	1.57787
	165	18.9931	1.19577	21.3671	1.59635
	165.5	19.0639	1.11969	21.3893	1.57978
	166	19.1854	1.10425	20.9669	1.32137
	166.5	19.2301	1.25066	21.3024	1.39457
	167	18.9718	1.24429	21.4595	1.30034
	167.5	18.9975	1.2605	21.2547	1.19463
	168	18.9246	1.1927	20.8927	1.20451
	168.5	18.8367	1.14295	21.1136	1.18553
	169	18.9079	1.06667	20.765	1.32386
	169.5	18.7768	1.05345	20.8006	1.26386
	170	18.7075	1.03926	20.6931	1.22526
	170.5	19.0445	1.14374	20.8813	1.17808
	171	18.9504	1.10261	20.7872	1.20131
	171.5	18.828	1.10789	20.7422	1.19297
	172	18.7724	1.11491	20.5629	1.16454
	172.5	18.7317	1.13469	20.5909	1.14353
	173	18.6961	1.12005	20.4642	1.17967
	173.5	18.8373	1.16211	20.6429	1.22114
	174	18.6784	1.04274	20.6831	1.2972
	174.5	18.625	0.895426	20.6664	1.33417
	175	18.5162	1.04253	20.8496	1.56799
	175.5	18.5816	1.03616	21.3046	1.45035
	176	18.7205	1.09889	21.2182	1.55288
	176.5	18.6717	1.12732	21.2538	1.52652
	177	18.8825	1.28271	21.3665	1.55367
	177.5	18.9243	1.25406	21.3824	1.55668
	178	18.5688	1.49233	21.2733	1.63525
	178.5	18.685	1.37818	21.3065	1.58512
	179	18.659	1.45635	21.1808	1.60466
	179.5	18.6119	1.43198	20.7132	1.31479
	180	18.7734	1.5271	20.5797	1.45412
	180.5	18.8568	1.40322	20.7214	1.27967
	181	18.5821	1.25664	20.6052	1.32812
	181.5	18.5457	1.2315	21.0891	1.53651
	182	18.5025	1.31826	21.4243	1.35851
	182.5	18.4997	1.26064	21.4588	1.41437
	183	18.3782	1.32823	21.4689	1.41249
	183.5	18.4101	1.42459	21.0978	1.34968
	184	18.5928	1.38588	20.8271	1.33689
	184.5	18.6278	1.3159	20.8247	1.31771
	185	18.5344	1.35227	20.835	1.30049
	185.5	18.7646	1.24702	20.9349	1.19671
	186	19.2238	1.04969	21.0075	1.23079
	186.5	19.2734	1.09168	20.9582	1.26553
	187	19.2594	1.08955	21.0211	1.3198
	187.5	19.2613	0.988233	21.1876	1.45552
	188	18.8191	1.03217	21.3772	1.60041
	188.5	18.8547	1.18387	21.4357	1.55765
	189	18.6041	1.19884	21.4105	1.77668
	189.5	18.7895	1.18533	21.356	1.77286
	190	18.6997	1.16236	21.2441	1.54131
	190.5	18.8951	1.09018	21.0407	1.43788
	191	18.7029	1.08012	20.91	1.42985
	191.5	19.1239	1.17971	21.1374	1.33866
	192	19.1351	1.11067	20.9928	1.30918
	192.5	19.1191	1.13952	21.0372	1.28898
	193	19.1774	1.12752	21.0443	1.27394
	193.5	19.1795	1.1442	21.0921	1.29109
	194	18.7959	1.10086	21.1417	1.37964
	194.5	18.4232	1.17576	21.2122	1.33333
	195	18.126	1.27991	20.8777	1.29849
	195.5	17.9162	1.3071	20.8688	1.29954
	196	18.2596	1.17553	20.8728	1.29217
	196.5	18.498	1.25237	20.9141	1.22777
	197	18.8566	1.25267	20.7857	1.29669
	197.5	18.7601	1.08698	20.7353	1.30932
	198	18.398	1.01588	20.9084	1.44929
	198.5	18.1623	0.965229	20.9621	1.44059
	199	18.2709	1.04469	21.0741	1.43308
	199.5	18.5047	0.994491	21.2609	1.41333
	200	18.5407	1.1551	21.2051	1.35368
	200.5	18.624	1.16179	21.1311	1.3946
	201	18.5668	1.20433	21.3634	1.29294
	201.5	18.4239	1.10044	20.9791	1.40495
	202	18.7393	1.11963	20.8658	1.37701
	202.5	18.6473	1.05751	20.8936	1.3984
	203	18.6987	0.872005	21.1082	1.41329
	203.5	18.6395	0.854892	20.6321	1.60376
	204	18.6263	0.874095	20.6963	1.61131
	204.5	18.3808	0.92501	20.6446	1.64337
	205	18.242	1.00501	20.7302	1.67461
	205.5	18.3937	1.09963	20.7162	1.66949
	206	18.2913	1.08934	21.0898	1.5216
	206.5	18.2452	0.993266	20.9887	1.61936
	207	18.4741	0.97844	21.0681	1.58686
	207.5	18.5225	0.975383	21.1495	1.39447
	208	18.3571	0.905118	20.6917	1.55141
	208.5	18.4776	0.942108	20.7281	1.58319
	209	18.5678	1.03391	20.9423	1.53142
	209.5	18.6396	0.995621	20.9285	1.47337
	210	18.7027	0.998557	20.7764	1.45631
	210.5	18.6548	0.979272	20.9674	1.46112
	211	18.397	0.944424	21.0951	1.56389
	211.5	18.4378	0.988413	21.1019	1.64925
	212	18.743	0.989427	20.9523	1.69965
	212.5	18.4658	0.821536	21.0618	1.68528
	213	18.4349	0.80539	20.8188	1.57148
	213.5	18.0545	0.896402	20.66	1.61164
	214	18.1473	0.936957	20.6839	1.45142
	214.5	18.0111	0.941758	20.5936	1.41023
	215	18.2093	0.948241	20.2705	1.51073
	215.5	18.2788	0.950964	20.2731	1.49389
	216	18.4887	0.822544	20.3304	1.46289
	216.5	18.6011	0.723181	20.2391	1.47113
	217	18.4502	0.953021	20.6419	1.3848
	217.5	18.2885	0.849061	20.7168	1.38696
	218	18.5171	0.849887	20.4153	1.4741
	218.5	18.256	0.910371	20.4165	1.52774
	219	18.1303	0.857658	20.3494	1.5719
	219.5	18.046	0.756964	20.2884	1.51863
	220	18.1645	0.79964	20.0672	1.4579
	220.5	18.1257	0.802925	20.1843	1.42934
	221	18.4438	1.03806	20.2434	1.53793
	221.5	18.3797	1.08353	20.3764	1.50368
	222	18.409	1.20051	20.4321	1.50872
	222.5	18.4185	1.18771	20.2761	1.5502
	223	18.0886	1.10186	20.3889	1.54716
	223.5	18.0949	0.995744	20.5485	1.61642
	224	18.4665	0.910835	20.4918	1.54935
	224.5	18.4478	0.845958	20.4294	1.55224
	225	18.1401	0.798143	20.7478	1.37538
	225.5	18.5114	0.867681	20.5122	1.39775
	226	18.2936	0.862693	20.2588	1.4692
	226.5	18.1222	0.903104	20.2794	1.36189
	227	18.1729	0.903957	20.6474	1.31202
	227.5	18.1448	0.942146	20.2005	1.45113
	228	17.9304	0.951738	20.1825	1.44849
	228.5	18.1582	0.969575	20.0457	1.35322
	229	18.2372	1.04536	20.0795	1.29747
	229.5	18.0918	1.24939	19.5861	1.30835
	230	17.7009	1.23042	19.6827	1.36846
	230.5	17.4205	1.23313	19.6552	1.36024
	231	17.4608	1.22253	19.9198	1.45149
	231.5	17.6214	1.22962	20.1297	1.45167
	232	17.1383	1.10075	20.524	1.43383
	232.5	17.6109	1.24123	20.5545	1.43165
	233	17.3761	1.31844	20.3852	1.38063
	233.5	17.2018	1.3203	19.6438	1.35269
	234	17.4384	1.2418	19.4414	1.31037
	234.5	17.5999	1.22558	19.2076	1.31674
	235	17.5584	1.21193	19.2594	1.34823
	235.5	17.3718	1.17397	19.1847	1.22223
	236	17.5608	1.13834	19.4275	1.21246
	236.5	17.5762	0.986451	19.5301	1.31093
	237	17.5891	0.941553	19.6093	1.26545
	237.5	17.4895	0.8591	19.6551	1.10201
	238	17.3293	1.01414	19.6464	1.25715
	238.5	17.2035	1.00948	19.491	1.18606
	239	17.1055	1.01199	19.66	1.1624
	239.5	17.3097	0.915473	19.6175	0.989183
	240	17.385	0.792678	19.557	1.0653
	240.5	17.4865	0.804429	19.4627	1.13847
	241	17.6251	0.882014	19.2613	1.10488
	241.5	18.0622	0.881623	19.1152	1.16818
	242	17.6716	0.943276	19.1214	1.25744
	242.5	17.5066	0.948902	19.2998	1.30713
	243	17.4017	0.952517	19.5846	1.3207
	243.5	17.4826	0.925372	19.9007	1.35967
	244	17.4257	0.999968	19.9968	1.26002
	244.5	17.4693	0.991085	19.6014	1.39943
	245	17.1437	0.972724	19.5634	1.30536
	245.5	17.0029	1.00013	19.4637	1.29816
	246	16.8577	0.933359	19.1818	1.28416
	246.5	16.7318	0.799348	19.1116	1.29183
	247	16.832	0.807609	19.0282	1.34738
	247.5	16.9528	0.866942	18.9048	1.39251
	248	16.9528	0.866942	18.9149	1.39933
	248.5	16.9604	0.868594	18.9177	1.40122
	249	16.9226	0.861044	18.9177	1.40122
	249.5	16.9136	0.859496	18.8108	1.33148

## Sheet: Fig.S6b
	Time traces						Slope
		Control (unpaired)		5x spaced			Control (unpaired)	5x spaced
	Time (s)	Mean	SEM	Mean	SEM		0.591725	0.88111
	0	0.303772	0.846144	1.10698	0.638189		0.55644	0.81771
	0.5	0.536397	0.881663	0.900595	0.765627		0.46731	1.1346
	1	0.518116	1.01394	0.899947	0.89622		0.691795	0.896555
	1.5	0.291919	0.993872	0.380055	0.913269		0.712145	0.640455
	2	0.239357	0.961465	0.353292	0.733541		0.67975	1.1784
	2.5	0.0816317	0.846242	0.125411	0.701835		0.69946	0.67924
	3	0.017728	0.836752	-0.0699321	0.725724		0.5636	0.69361
	3.5	-0.0590578	0.809513	-0.128925	0.670375		0.872445	0.83137
	4	0.236038	0.672989	-0.0202693	0.611719		1.74685	0.87499
	4.5	0.604765	0.690805	-0.0870565	0.64921
	5	0.444903	0.707216	0.151561	0.691081
	5.5	-0.0488757	0.661263	0.17503	0.688969
	6	0.0639566	0.699792	-0.127565	0.769101
	6.5	-0.0416184	0.627672	-0.000576948	0.786409
	7	0.0939816	0.533334	-0.0849398	0.713892
	7.5	0.174246	0.516086	-0.205426	0.625129
	8	0.194024	0.510463	-0.288153	0.565942
	8.5	0.034326	0.363408	-0.187744	0.551493
	9	0.102406	0.300929	-0.0895347	0.508852
	9.5	-0.028913	0.307931	-0.000172383	0.464918
	10	0.146364	0.315787	0.0714568	0.444396
	10.5	0.30973	0.33312	-0.0676461	0.428668
	11	0.260173	0.327663	0.186957	0.367828
	11.5	0.00250624	0.377204	0.769619	0.419734
	12	0.138303	0.389411	0.279549	0.524386
	12.5	0.22612	0.45887	0.356755	0.436007
	13	0.251288	0.401306	0.335857	0.434033
	13.5	0.224615	0.394998	0.114403	0.494699
	14	0.300576	0.402757	-0.0949698	0.501108
	14.5	0.134046	0.410422	-0.0813138	0.435446
	15	0.0307029	0.455271	-0.0384511	0.373987
	15.5	0.141385	0.471507	-0.0982918	0.363747
	16	0.201198	0.45411	0.0298012	0.363182
	16.5	0.508786	0.416451	0.199806	0.318998
	17	0.357975	0.350006	0.217485	0.315218
	17.5	0.481545	0.314431	0.442144	0.313595
	18	0.376176	0.340649	0.405108	0.287788
	18.5	0.36942	0.367927	0.371951	0.313554
	19	1.01237	0.637571	0.455358	0.326632
	19.5	1.03797	0.628994	0.53947	0.330264
	20	1.11951	0.670286	0.333869	0.363311
	20.5	0.999271	0.618923	0.586158	0.358697
	21	0.844033	0.648368	0.65003	0.3344
	21.5	0.687061	0.610561	0.480048	0.340198
	22	0.641481	0.655151	0.429057	0.342326
	22.5	0.839929	0.69606	0.372793	0.331588
	23	0.869389	0.592224	0.332727	0.34568
	23.5	0.958152	0.578565	0.0281086	0.241494
	24	0.733601	0.435187	0.135112	0.229749
	24.5	0.27746	0.198647	0.166819	0.175183
	25	0.268426	0.178673	0.082939	0.223198
	25.5	0.165452	0.174556	0.0698125	0.153002
	26	-0.0632764	0.197815	0.268528	0.198275
	26.5	-0.0724127	0.316181	0.125608	0.23973
	27	0.151068	0.38785	0.174757	0.216214
	27.5	0.0139222	0.346706	0.189254	0.203882
	28	-0.0395294	0.408822	0.376467	0.276348
	28.5	0.0231709	0.471961	0.27288	0.229453
	29	0.279619	0.417948	0.387012	0.225588
	29.5	-0.144252	0.412034	0.425506	0.217339
	30	-0.152939	0.313651	0.222661	0.200793
	30.5	-0.448525	0.257211	0.248098	0.18913
	31	-0.592106	0.287492	0.322715	0.206973
	31.5	-0.586537	0.357533	0.196552	0.166382
	32	-0.520725	0.356891	0.0957985	0.191197
	32.5	-0.559926	0.369039	0.357992	0.192982
	33	-0.417454	0.337533	0.101798	0.265544
	33.5	-0.301358	0.406174	0.021792	0.264639
	34	-0.228429	0.243161	0.27	0.218786
	34.5	-0.258579	0.19015	-0.260242	0.325201
	35	-0.0851667	0.118383	-0.19016	0.329018
	35.5	0.00909742	0.222376	0.164425	0.149587
	36	-0.112172	0.17245	0.251969	0.250454
	36.5	-0.121488	0.186807	0.238161	0.190581
	37	-0.136335	0.180123	0.302836	0.217825
	37.5	-0.130012	0.169834	0.308552	0.204531
	38	0.0582083	0.197305	0.321671	0.342631
	38.5	0.0913177	0.285072	0.367792	0.34365
	39	0.166937	0.338396	0.39884	0.271288
	39.5	0.192978	0.35862	0.532465	0.295377
	40	0.0438956	0.307125	0.549402	0.330972
	40.5	0.191581	0.295412	0.17396	0.351951
	41	0.124281	0.183213	-0.0375179	0.343505
	41.5	0.14421	0.2053	0.0771473	0.39893
	42	0.161304	0.183467	0.0106939	0.348375
	42.5	0.160729	0.207764	0.233379	0.34496
	43	0.121543	0.339451	0.255457	0.284643
	43.5	-0.115627	0.29697	0.321257	0.306696
	44	-0.0876375	0.316819	0.309188	0.304891
	44.5	-0.0822993	0.288218	0.249091	0.228804
	45	-0.368371	0.373349	0.637446	0.336396
	45.5	-0.145386	0.423412	0.848051	0.366403
	46	0.0256287	0.472586	0.728983	0.370687
	46.5	0.0628421	0.473347	0.596834	0.383368
	47	-0.0881772	0.456037	0.619626	0.435114
	47.5	-0.151576	0.385074	0.527789	0.32735
	48	-0.0812079	0.355701	0.489953	0.277628
	48.5	-0.138924	0.276413	0.658429	0.237656
	49	-0.171084	0.336561	0.45051	0.229398
	49.5	-0.119703	0.37566	0.676444	0.157021
	50	-0.155031	0.363796	0.345692	0.233742
	50.5	-0.319231	0.553326	0.413248	0.199851
	51	-0.639554	0.537394	0.523207	0.230289
	51.5	-0.401438	0.575347	0.476244	0.288783
	52	-0.33581	0.33744	0.404363	0.371124
	52.5	-0.600611	0.611152	0.316311	0.442743
	53	-0.644851	0.512178	0.223441	0.417661
	53.5	-0.321141	0.531515	0.264419	0.391357
	54	-0.60901	0.497922	0.189752	0.351291
	54.5	-0.620126	0.486966	0.259957	0.380433
	55	-0.805229	0.409054	0.141214	0.369723
	55.5	-0.816176	0.362648	-0.132884	0.296
	56	-0.946271	0.394567	-0.381969	0.324409
	56.5	-0.624994	0.44361	-0.55164	0.363035
	57	-0.964479	0.459449	-0.396542	0.346932
	57.5	-0.767044	0.600108	-0.245756	0.393757
	58	-1.16541	0.472926	-0.0861288	0.514453
	58.5	-1.111	0.535173	-0.384233	0.685639
	59	-0.685686	0.487228	-0.371335	0.758875
	59.5	-0.569843	0.386688	-0.376409	0.720423
	60	-0.401412	0.440071	0.375992	0.44324
	60.5	-0.439994	0.426539	0.829683	0.366817
	61	-0.291778	0.46862	1.30734	0.38429
	61.5	-0.0117235	0.537105	1.05919	0.470674
	62	-0.160486	0.400711	1.29791	0.462018
	62.5	-0.0401992	0.330882	0.846182	0.490518
	63	0.101864	0.334457	0.884173	0.615295
	63.5	0.509775	0.337244	0.864205	0.614417
	64	0.576393	0.382195	0.931064	0.523449
	64.5	0.744241	0.479959	1.084	0.485954
	65	0.98559	0.495061	1.55586	0.431319
	65.5	1.14957	0.531077	1.922	0.470748
	66	1.16692	0.591171	1.97833	0.455839
	66.5	1.02582	0.684542	1.84787	0.412285
	67	1.28077	0.831722	1.7883	0.463407
	67.5	1.86818	0.812446	1.73208	0.476597
	68	1.72314	0.92667	1.89571	0.465055
	68.5	2.09222	0.902566	1.79296	0.465942
	69	2.27515	0.954544	1.7368	0.47612
	69.5	2.64805	1.0509	1.82607	0.477354
	70	2.41117	1.09376	2.0129	0.513614
	70.5	2.71093	1.16753	2.39991	0.671395
	71	3.22316	1.0265	2.7678	0.834006
	71.5	3.18433	1.04287	2.91266	0.81675
	72	3.28461	1.05619	3.15712	0.872482
	72.5	3.62689	1.09738	3.30796	0.881041
	73	3.62903	1.17238	3.57526	0.92207
	73.5	3.76532	1.25265	3.89246	0.892363
	74	4.0332	1.27775	4.11737	0.970477
	74.5	4.18348	1.24913	4.26752	1.00729
	75	4.50113	1.21594	4.56018	1.06457
	75.5	4.64756	1.21739	4.86995	1.20265
	76	5.1643	1.19732	5.44551	1.23792
	76.5	5.76093	1.19807	5.78717	1.37567
	77	5.91113	1.26989	5.74373	1.3945
	77.5	6.14338	1.25409	5.93402	1.45216
	78	6.50099	1.24413	6.37819	1.46529
	78.5	6.46316	1.33252	6.67253	1.50873
	79	6.89436	1.37832	6.76281	1.56431
	79.5	7.11721	1.2968	7.0226	1.59488
	80	7.53246	1.207	7.20197	1.61577
	80.5	7.81807	1.25868	7.60867	1.71114
	81	8.00333	1.29631	8.28702	1.8813
	81.5	8.29623	1.34979	8.66365	1.92077
	82	8.43709	1.41983	8.8739	1.96764
	82.5	8.7711	1.39621	8.89879	2.08344
	83	9.44165	1.56549	9.51013	2.06785
	83.5	9.84982	1.52635	9.9503	2.16683
	84	10.0569	1.48473	9.92893	2.21091
	84.5	10.6845	1.61968	10.1727	2.20044
	85	10.8436	1.64357	10.4768	2.1851
	85.5	11.1517	1.63487	10.7201	2.27641
	86	11.2453	1.63143	10.7634	2.19677
	86.5	11.6441	1.69149	11.1488	2.19639
	87	11.7765	1.66437	11.3917	2.21511
	87.5	11.9869	1.68369	11.878	2.18128
	88	12.0662	1.74458	12.1304	2.24388
	88.5	12.1156	1.68569	12.2836	2.17326
	89	12.3484	1.68609	12.3363	2.17332
	89.5	12.4727	1.6427	12.4829	2.28475
	90	12.6519	1.55684	12.4955	2.26971
	90.5	12.7211	1.52796	12.5449	2.27809
	91	13.0079	1.62162	12.697	2.31498
	91.5	13.0976	1.64714	12.9973	2.3397
	92	13.3238	1.71804	13.1775	2.28543
	92.5	13.4249	1.82461	13.3562	2.31647
	93	13.3362	1.70703	13.5628	2.28611
	93.5	13.5058	1.57086	13.6518	2.26937
	94	13.7136	1.59635	13.826	2.22077
	94.5	14.2492	1.51019	14.1307	2.34658
	95	14.24	1.5038	14.6804	2.30025
	95.5	14.4767	1.61103	14.7903	2.32166
	96	14.3503	1.5257	14.8662	2.33178
	96.5	14.2402	1.49831	14.9812	2.31296
	97	14.3903	1.54743	15.192	2.29826
	97.5	14.6484	1.43164	15.0844	2.24975
	98	14.7474	1.4181	15.1389	2.25121
	98.5	14.7216	1.30669	15.3455	2.24374
	99	14.9266	1.32509	15.5323	2.22073
	99.5	15.1651	1.31534	15.3956	2.19335
	100	15.4841	1.38347	15.7236	2.19661
	100.5	15.4669	1.37226	15.7512	2.12247
	101	15.6841	1.35979	15.7666	2.13092
	101.5	15.943	1.42933	15.9092	2.17076
	102	16.0022	1.36994	15.8821	2.11778
	102.5	15.5983	1.19618	16.0018	2.05848
	103	15.5149	1.14078	15.9929	2.04923
	103.5	15.8914	1.35167	15.9392	2.05039
	104	15.792	1.29378	15.752	2.04237
	104.5	15.7838	1.32439	15.8644	2.0699
	105	15.9552	1.37464	15.7277	2.08031
	105.5	16.252	1.54269	15.8321	2.08753
	106	16.0803	1.4643	16.0864	2.02438
	106.5	16.0816	1.47399	16.177	1.98433
	107	16.0946	1.38718	16.0754	1.8727
	107.5	15.8822	1.45026	16.1925	1.88279
	108	15.8129	1.42649	16.3176	1.8438
	108.5	15.7962	1.46698	16.1258	1.85504
	109	15.9611	1.5157	16.1521	1.93044
	109.5	15.7467	1.4764	16.2634	1.94087
	110	15.7557	1.5283	16.5479	1.8817
	110.5	15.5048	1.51671	16.3809	1.84715
	111	15.5518	1.48275	16.2442	1.88112
	111.5	15.3663	1.64108	16.475	1.82412
	112	15.3033	1.63314	16.5532	1.77531
	112.5	15.258	1.62366	16.6293	1.66976
	113	15.0664	1.58485	16.7942	1.71516
	113.5	15.4112	1.41627	16.8389	1.71278
	114	15.3298	1.35952	16.6512	1.67512
	114.5	15.4709	1.39109	16.6571	1.65874
	115	15.9165	1.46182	16.9001	1.69901
	115.5	15.5026	1.34975	17.0343	1.62595
	116	16.3094	1.64484	17.1326	1.5077
	116.5	16.3766	1.72574	17.3207	1.45833
	117	16.388	1.66404	17.1015	1.53263
	117.5	15.827	1.41322	17.134	1.50421
	118	15.8202	1.6747	16.9495	1.50922
	118.5	16.011	1.67175	17.2183	1.54064
	119	15.311	1.46173	17.2457	1.58658
	119.5	15.1814	1.39387	17.1487	1.52807
	120	15.3626	1.37924	16.947	1.52087
	120.5	15.6971	1.34519	17.2055	1.50775
	121	15.4294	1.26466	17.2451	1.52561
	121.5	15.7372	1.31312	17.2279	1.56508
	122	15.7732	1.33969	17.1146	1.47134
	122.5	15.6612	1.45008	17.0329	1.47225
	123	15.7009	1.38635	16.9982	1.5463
	123.5	15.9154	1.52384	16.8893	1.53418
	124	15.6952	1.48875	16.8193	1.55738
	124.5	15.5044	1.38624	16.8296	1.55211
	125	15.548	1.4048	17.0785	1.46675
	125.5	15.6117	1.43662	17.2229	1.44513
	126	15.714	1.39828	17.1842	1.46298
	126.5	15.2466	1.44205	17.3109	1.47155
	127	15.5473	1.44979	17.2687	1.47139
	127.5	15.3474	1.37822	16.934	1.47749
	128	15.2677	1.38024	17.0848	1.5002
	128.5	15.4411	1.34742	16.9216	1.59313
	129	15.624	1.38645	17.0079	1.6271
	129.5	15.185	1.33271	17.2664	1.42297
	130	14.9161	1.36133	17.5281	1.50075
	130.5	15.0976	1.34855	17.442	1.55179
	131	15.0699	1.34339	17.2558	1.49254
	131.5	14.9819	1.33406	17.144	1.44891
	132	15.0182	1.31694	17.055	1.51145
	132.5	15.1202	1.31097	16.9796	1.51001
	133	14.9775	1.36047	17.1351	1.4828
	133.5	14.7761	1.41988	17.1199	1.51925
	134	15.081	1.47595	17.1325	1.57621
	134.5	14.9368	1.4784	17.1361	1.55367
	135	14.8156	1.47645	17.1722	1.56709
	135.5	14.9604	1.48685	17.112	1.57649
	136	15.1961	1.40808	17.273	1.55486
	136.5	15.273	1.38256	17.3657	1.59053
	137	15.4009	1.40534	17.2258	1.53825
	137.5	15.4916	1.41624	17.1735	1.62242
	138	15.5861	1.37025	17.4519	1.48236
	138.5	15.33	1.32904	17.5325	1.59477
	139	15.3278	1.35023	17.4354	1.64675
	139.5	15.3405	1.38391	17.7973	1.56462
	140	15.272	1.3453	17.7978	1.54121
	140.5	15.2919	1.35613	17.7813	1.55464
	141	15.4576	1.33947	17.6231	1.52617
	141.5	15.559	1.39502	17.5881	1.45895
	142	15.323	1.36139	17.7706	1.43449
	142.5	15.4219	1.47336	17.4261	1.47118
	143	15.1932	1.41543	17.2611	1.41269
	143.5	15.0938	1.4305	17.1745	1.34453
	144	15.2857	1.43867	17.0581	1.43397
	144.5	15.6931	1.41144	17.1456	1.40317
	145	15.7598	1.41072	17.2794	1.38557
	145.5	15.6054	1.44444	17.1896	1.38896
	146	15.551	1.4884	17.1435	1.32586
	146.5	15.9045	1.66254	17.2981	1.21465
	147	15.691	1.66384	17.092	1.17606
	147.5	15.6644	1.67972	16.9754	1.21893
	148	15.2423	1.59305	16.9212	1.19051
	148.5	15.1235	1.66622	17.0077	1.18148
	149	15.1496	1.69287	16.8442	1.24647
	149.5	15.492	1.73977	17.0792	1.16354
	150	15.2817	1.69706	17.3047	1.09169
	150.5	15.4487	1.68249	16.9719	1.20315
	151	15.5237	1.6375	17.0078	1.22997
	151.5	15.4672	1.57632	17.2316	1.21461
	152	15.3482	1.59567	16.9995	1.25254
	152.5	15.5897	1.69218	16.8509	1.31394
	153	15.1747	1.70048	16.7958	1.3551
	153.5	15.3873	1.70073	16.9405	1.28282
	154	15.3243	1.66695	16.8673	1.3419
	154.5	15.2388	1.65497	16.861	1.36595
	155	14.9957	1.60775	17.0382	1.33988
	155.5	15.3504	1.66531	16.9623	1.30167
	156	15.316	1.66817	17.1211	1.28971
	156.5	15.5598	1.63331	17.2622	1.20635
	157	15.6871	1.62334	17.2185	1.17099
	157.5	15.541	1.65468	16.9015	1.28549
	158	15.671	1.76085	17.0235	1.30141
	158.5	15.545	1.73475	16.9441	1.35731
	159	15.4402	1.71192	16.6528	1.43363
	159.5	15.3265	1.68299	16.7054	1.45827
	160	15.8939	1.77485	17.0367	1.39863
	160.5	15.5646	1.6428	16.681	1.49231
	161	15.4431	1.63189	16.7126	1.44049
	161.5	15.6335	1.70182	16.6269	1.40774
	162	15.6475	1.70839	16.6089	1.4481
	162.5	15.1629	1.56566	16.4836	1.39191
	163	15.1915	1.53157	16.5448	1.39398
	163.5	15.2386	1.53456	16.8639	1.42571
	164	15.0604	1.54008	16.8662	1.3925
	164.5	15.0773	1.56411	16.6811	1.36154
	165	15.1696	1.59004	16.8382	1.51502
	165.5	15.0013	1.67089	16.4725	1.62644
	166	15.2449	1.7466	16.2692	1.73741
	166.5	15.3115	1.74678	16.3201	1.7561
	167	15.4786	1.64184	16.455	1.62928
	167.5	15.6809	1.78161	16.3382	1.58125
	168	15.7523	1.80455	16.4702	1.54488
	168.5	15.3242	1.61463	16.5069	1.554
	169	15.6667	1.72537	16.8582	1.56518
	169.5	15.2842	1.67539	16.4922	1.75344
	170	15.2653	1.64352	16.4745	1.79104
	170.5	15.4569	1.63087	16.6898	1.9144
	171	15.7109	1.62158	16.6501	2.12654
	171.5	15.6331	1.51178	16.6523	2.01183
	172	15.7044	1.53054	16.9769	1.99816
	172.5	15.6444	1.52263	17.5133	1.76171
	173	15.2213	1.63119	17.4572	1.78273
	173.5	15.54	1.72409	17.7176	1.72146
	174	15.4294	1.76193	18.0694	1.59678
	174.5	15.4965	1.80881	17.9337	1.52143
	175	15.6745	1.76976	17.9076	1.49501
	175.5	15.7991	1.83448	17.631	1.43727
	176	15.7571	1.83979	17.6467	1.41369
	176.5	15.8803	1.887	17.6495	1.45706
	177	16.0857	1.95349	17.6893	1.55537
	177.5	16.2216	1.84903	17.704	1.5184
	178	16.1014	1.9647	17.7863	1.51242
	178.5	16.4085	1.87811	17.9097	1.51243
	179	16.0935	1.81014	17.89	1.571
	179.5	15.6056	1.83514	17.8638	1.52515
	180	15.453	1.87854	17.8128	1.55718
	180.5	15.5231	1.90828	17.893	1.56497
	181	15.5408	1.8703	17.8845	1.58227
	181.5	15.8984	1.92645	17.8654	1.56743
	182	16.2195	1.93985	17.8499	1.5689
	182.5	16.3866	1.97002	17.7725	1.53689
	183	16.6173	2.08581	17.7361	1.52625
	183.5	16.3767	2.20292	17.7128	1.48825
	184	16.2244	2.17844	17.719	1.47414
	184.5	15.8484	2.13258	17.6323	1.52144
	185	15.6356	2.13113	17.5471	1.5125
	185.5	15.5585	2.12775	17.5166	1.49825
	186	15.3146	2.04564	18.0838	1.7775
	186.5	15.7038	2.06687	18.1377	1.7787
	187	15.5471	2.12817	18.1016	1.84386
	187.5	15.5027	2.12438	18.1461	1.81426
	188	15.2074	2.05437	18.1791	1.82999
	188.5	15.209	2.06323	18.4374	1.77775
	189	15.0564	1.99297	18.3565	1.88638
	189.5	15.1877	1.99982	18.6122	1.91054
	190	15.4012	1.90396	18.828	1.88673
	190.5	15.4604	1.83583	18.7727	1.82178
	191	15.4364	1.8432	18.7546	1.83208
	191.5	15.5819	1.87174	18.7003	1.83179
	192	15.5726	1.90769	18.0738	1.41352
	192.5	15.6386	1.96162	17.6011	1.41317
	193	15.5631	1.96339	17.4213	1.50409
	193.5	15.6102	2.01127	17.7133	1.50062
	194	15.3251	1.93406	17.7801	1.43558
	194.5	15.2539	1.90794	18.0556	1.38243
	195	15.1943	1.91512	18.0545	1.38825
	195.5	15.286	1.97021	17.8943	1.47735
	196	15.3513	1.95176	17.8071	1.55315
	196.5	15.1633	1.90306	17.7122	1.6137
	197	15.3899	1.99949	17.9755	1.59823
	197.5	15.6283	2.08654	17.993	1.5589
	198	15.5106	2.05317	18.1016	1.51467
	198.5	15.2453	2.114	18.2844	1.47174
	199	15.1273	2.22263	18.348	1.4328
	199.5	15.2739	2.19884	18.6862	1.43669
	200	15.0983	2.18796	18.8989	1.47711
	200.5	15.2868	2.22944	18.9756	1.458
	201	15.0593	2.22622	19.0289	1.46992
	201.5	14.9958	2.15394	19.2175	1.48923
	202	14.9641	2.21519	18.6887	1.63147
	202.5	15.0486	2.15515	18.7434	1.5622
	203	14.9156	2.17687	18.6741	1.52822
	203.5	14.7227	2.15809	18.5816	1.49209
	204	14.6937	2.15882	18.4076	1.43315
	204.5	14.7988	2.15373	18.0618	1.4404
	205	14.92	2.19362	18.1486	1.37972
	205.5	15.0513	2.21349	18.2268	1.35248
	206	15.151	2.27327	18.4672	1.40181
	206.5	15.134	2.37306	18.4894	1.34494
	207	15.348	2.35844	18.4218	1.30377
	207.5	15.2269	2.40161	18.5054	1.3798
	208	15.2489	2.4115	18.5354	1.36903
	208.5	15.1396	2.40481	18.7608	1.45901
	209	15.0964	2.37724	18.7493	1.55
	209.5	15.0211	2.44716	18.8362	1.55969
	210	15.0805	2.44128	18.6929	1.59382
	210.5	14.9601	2.45489	18.5161	1.6099
	211	14.8172	2.37741	18.3473	1.56868
	211.5	15.0671	2.46093	18.161	1.5002
	212	15.0158	2.46425	18.2621	1.48345
	212.5	15.4091	2.50469	18.4111	1.40563
	213	15.2272	2.51839	18.4438	1.4011
	213.5	15.2611	2.56058	18.5757	1.40327
	214	15.1034	2.71597	18.51	1.52519
	214.5	14.6617	2.64441	18.4196	1.48732
	215	14.9469	2.44861	18.4391	1.47816
	215.5	14.97	2.60196	18.405	1.46046
	216	14.9204	2.61091	18.3953	1.43719
	216.5	15.0764	2.52749	18.3076	1.43164
	217	15.0249	2.65649	18.1695	1.51879
	217.5	15.1723	2.67292	18.1276	1.55215
	218	15.177	2.69816	18.2165	1.53553
	218.5	15.2388	2.72769	18.2051	1.57917
	219	15.2603	2.75711	18.2927	1.60931
	219.5	15.1855	2.70331	18.1607	1.60586
	220	14.7796	2.69732	18.2876	1.49391
	220.5	14.7332	2.6794	18.4835	1.64231
	221	14.6798	2.78114	18.3306	1.66738
	221.5	14.5342	2.79783	18.4731	1.59529
	222	14.8069	2.83546	18.4566	1.63071
	222.5	14.9311	2.84277	18.5044	1.63468
	223	14.8563	2.82886	18.4236	1.65011
	223.5	14.9059	2.80154	18.3455	1.63836
	224	15.2594	2.92028	18.3237	1.65353
	224.5	14.9334	2.8513	18.3989	1.64423
	225	15.0373	2.86905	18.3024	1.68761
	225.5	15.1148	2.91471	18.1084	1.69854
	226	14.6586	2.81093	18.1668	1.6717
	226.5	14.6687	2.7716	18.4266	1.5727
	227	14.6255	2.75459	18.4721	1.60101
	227.5	14.251	2.74818	18.3273	1.61623
	228	14.4014	2.72836	18.4497	1.62034
	228.5	14.4876	2.76281	18.1818	1.64966
	229	14.6727	2.75278	18.1922	1.66887
	229.5	14.1436	2.65425	18.4048	1.67803
	230	14.4518	2.71948	18.4511	1.65716
	230.5	14.2814	2.6878	18.5742	1.79074
	231	14.4406	2.66603	18.4471	1.8008
	231.5	14.2906	2.66236	18.4584	1.81047
	232	14.7757	2.72689	18.4523	1.78606
	232.5	14.5752	2.77645	18.6839	1.68949
	233	14.4686	2.85714	18.6569	1.70606
	233.5	14.3984	2.92125	18.6311	1.7237
	234	14.2967	2.93022	18.852	1.75059
	234.5	14.1923	2.92381	18.8387	1.68095
	235	14.9271	3.13853	18.7869	1.65354
	235.5	14.3623	2.98124	18.4786	1.67333
	236	14.4609	2.97534	18.6111	1.65146
	236.5	14.6192	3.01166	18.7648	1.65505
	237	15.0833	3.03682	18.9087	1.66861
	237.5	14.8993	2.99418	18.8656	1.7321
	238	14.8122	2.99173	19.2435	1.6421
	238.5	14.801	3.01168	19.4264	1.55863
	239	14.9335	3.05376	19.2074	1.60361
	239.5	15.0982	3.0757	19.2855	1.54555
	240	14.918	3.03536	19.0449	1.63715
	240.5	14.9445	3.09246	18.9885	1.65341
	241	15.0268	3.05769	18.9233	1.61136
	241.5	15.0485	3.04128	19.0661	1.67711
	242	14.7832	3.00756	19.0765	1.54114
	242.5	14.6727	3.08615	19.1193	1.53275
	243	14.4695	3.11503	19.102	1.54105
	243.5	14.626	3.18217	19.2624	1.56817
	244	14.5946	3.19216	19.2151	1.5428
	244.5	14.8217	3.22644	19.1209	1.64521
	245	14.969	3.17057	18.7859	1.76974
	245.5	15.0288	3.14278	18.8011	1.73368
	246	15.1849	3.10716	18.7503	1.74442
	246.5	15.0882	3.08156	18.8302	1.78339
	247	14.8769	3.12994	18.6385	1.85299
	247.5	15.1058	3.11971	18.6254	1.85558
	248	15.2041	3.12594	18.6528	1.85875
	248.5	15.4891	3.05381	18.7214	1.892
	249	15.3486	3.06197	18.532	1.87194
	249.5	14.9626	3.06945	18.2909	1.8228

## Sheet: Fig.S6c
	Time traces						Slope
		Control (unpaired)		1x			Control (unpaired)	1x
	Time (s)	Mean	SEM	Mean	SEM		1.03641	1.4442
	0	-0.211362	0.150445	-0.457449	0.324883		1.1367	1.47065
	0.5	-0.368204	0.187509	-0.598258	0.383163		1.30365	1.46325
	1	-0.458342	0.212263	-0.538476	0.452214		1.60115	1.6297
	1.5	-0.330832	0.194242	-0.806114	0.423586		0.86188	1.5935
	2	-0.246028	0.183965	-0.802998	0.392543		1.01475	1.59665
	2.5	-0.282968	0.209984	-0.869126	0.372976		1.0468
	3	-0.359543	0.184042	-0.896299	0.32077		1.5033
	3.5	-0.239783	0.205353	-1.00556	0.330902		1.5627
	4	-0.260926	0.20165	-0.76874	0.240581		1.5252
	4.5	-0.345649	0.17705	-0.78977	0.256268
	5	-0.283467	0.18107	-0.609833	0.268839
	5.5	-0.275542	0.14967	-0.617856	0.270044
	6	-0.302078	0.159262	-0.388682	0.28901
	6.5	-0.141145	0.108562	-0.446297	0.326338
	7	-0.177305	0.115497	-0.50462	0.246392
	7.5	-0.200177	0.10625	-0.545606	0.305703
	8	-0.186937	0.109242	-0.608332	0.305077
	8.5	-0.111763	0.15683	-0.639682	0.22683
	9	-0.0661709	0.155328	-0.448995	0.175711
	9.5	0.0493058	0.178833	-0.335312	0.197079
	10	0.0904185	0.149388	-0.146099	0.142107
	10.5	0.142598	0.213119	-0.24296	0.0877456
	11	0.0989612	0.172294	-0.100611	0.143167
	11.5	0.0694513	0.1416	-0.278789	0.223583
	12	-0.153174	0.140239	-0.22501	0.193463
	12.5	-0.179659	0.14757	-0.23683	0.171054
	13	-0.132536	0.152721	-0.383302	0.191247
	13.5	-0.172358	0.16379	-0.357994	0.163968
	14	-0.17557	0.113856	-0.277712	0.166041
	14.5	-0.190777	0.131481	-0.182074	0.151867
	15	-0.14779	0.183205	-0.0626241	0.111581
	15.5	-0.0623462	0.158835	0.0750102	0.100021
	16	0.0116711	0.172192	0.0184844	0.160734
	16.5	0.0258128	0.17497	0.169757	0.194828
	17	-0.0114271	0.191449	0.255446	0.154028
	17.5	-0.0217248	0.175019	0.300847	0.120144
	18	-0.282673	0.132344	0.223117	0.197922
	18.5	-0.188816	0.128817	0.283383	0.227963
	19	-0.316366	0.111175	0.254435	0.201737
	19.5	-0.303644	0.107408	0.190861	0.204589
	20	-0.242441	0.0875998	0.135746	0.147128
	20.5	0.0710933	0.141814	0.123307	0.199857
	21	0.248052	0.186668	-0.00695692	0.16925
	21.5	0.242062	0.149941	0.275106	0.125409
	22	0.198388	0.163992	0.143738	0.118855
	22.5	0.135667	0.148272	0.253899	0.120586
	23	-0.00071457	0.127569	0.35168	0.0763922
	23.5	-0.045494	0.118919	0.35029	0.168839
	24	-0.165438	0.124258	0.138122	0.133937
	24.5	-0.0720452	0.0812972	0.298689	0.126776
	25	0.0168873	0.0983794	0.239963	0.101845
	25.5	0.118159	0.102043	0.126044	0.105225
	26	0.148979	0.124806	0.0883494	0.140498
	26.5	0.178056	0.134927	0.101867	0.119194
	27	0.224908	0.176931	0.212344	0.0574545
	27.5	0.177868	0.208464	0.236396	0.08005
	28	0.214422	0.177292	0.213575	0.0830016
	28.5	0.210361	0.181654	0.334475	0.103501
	29	0.288549	0.220927	0.301746	0.095405
	29.5	0.218004	0.20576	0.262429	0.148658
	30	0.201829	0.21252	0.338782	0.158711
	30.5	0.237014	0.268758	0.391847	0.110002
	31	0.283886	0.270464	0.450053	0.0966936
	31.5	0.278525	0.239321	0.303317	0.0859361
	32	0.375609	0.233606	0.23457	0.0831178
	32.5	0.319224	0.172605	0.284189	0.0481726
	33	0.328873	0.144467	0.329871	0.0563186
	33.5	0.27677	0.147252	0.314557	0.0816568
	34	0.126922	0.159918	0.240666	0.045216
	34.5	0.0718655	0.166357	0.334536	0.131354
	35	0.0975993	0.173586	0.318848	0.164727
	35.5	0.158424	0.156169	0.267595	0.125525
	36	0.0973187	0.134207	0.150967	0.216665
	36.5	0.106116	0.129948	0.208423	0.186655
	37	0.050516	0.106628	0.16574	0.174735
	37.5	0.0906417	0.107988	0.220425	0.117993
	38	0.190666	0.112968	0.236401	0.0387899
	38.5	0.167795	0.112106	0.261889	0.0668791
	39	0.179144	0.139419	0.315753	0.0889822
	39.5	0.12995	0.132907	0.305161	0.125954
	40	0.15519	0.129942	0.37786	0.1196
	40.5	0.0931333	0.123614	0.336379	0.168756
	41	0.0790033	0.0935862	0.321552	0.155353
	41.5	0.122883	0.11445	0.331738	0.158725
	42	0.182487	0.139548	0.225724	0.103214
	42.5	0.175172	0.147574	0.180798	0.118727
	43	0.080702	0.103572	0.173923	0.195411
	43.5	-0.00619169	0.145166	0.252264	0.20166
	44	0.0208655	0.153911	0.230511	0.188889
	44.5	-0.0640458	0.155369	0.321155	0.216774
	45	0.0382215	0.142864	0.42738	0.21523
	45.5	0.127703	0.141464	0.430552	0.179088
	46	0.141469	0.106539	0.422786	0.15293
	46.5	0.210348	0.103924	0.461308	0.144853
	47	0.22955	0.110174	0.486876	0.166453
	47.5	0.18862	0.136499	0.34469	0.138998
	48	0.0888508	0.115835	0.330485	0.124112
	48.5	0.133959	0.113878	0.237427	0.1075
	49	0.0921541	0.071156	0.128612	0.140205
	49.5	0.0204474	0.10274	0.307534	0.103486
	50	0.0751891	0.11529	0.256689	0.115996
	50.5	0.0970929	0.130196	0.364393	0.211196
	51	0.00499329	0.110948	0.303717	0.216421
	51.5	0.119415	0.13794	0.437705	0.179364
	52	0.18917	0.120641	0.372192	0.218449
	52.5	0.183982	0.175465	0.475133	0.160244
	53	0.165052	0.169631	0.4464	0.171314
	53.5	0.843107	0.797456	0.557644	0.175842
	54	0.773096	0.807877	0.552617	0.162903
	54.5	0.774061	0.804557	0.479955	0.150973
	55	0.472052	0.475103	0.205283	0.183034
	55.5	0.281443	0.295923	0.26035	0.16635
	56	0.380071	0.332554	0.236852	0.188608
	56.5	0.488633	0.412992	0.461922	0.342714
	57	0.307927	0.360356	0.435783	0.30123
	57.5	0.277955	0.353261	0.626968	0.275597
	58	0.384387	0.435625	0.392731	0.197552
	58.5	0.470289	0.678941	0.736579	0.755026
	59	-0.30299	0.309982	1.09401	0.635374
	59.5	-0.430416	0.426909	1.09048	0.650497
	60	0.0452246	0.404513	0.775125	0.358028
	60.5	-0.278934	0.452211	1.09224	0.599326
	61	-0.265129	0.43957	1.3286	0.883222
	61.5	0.376915	0.489367	1.709	0.989669
	62	0.383693	0.487572	2.01923	0.971391
	62.5	0.264762	0.406322	2.07627	1.14644
	63	0.435434	0.395546	2.37682	1.26906
	63.5	0.595107	0.332533	2.76164	1.3493
	64	0.816553	0.266385	2.92077	1.48592
	64.5	1.16226	0.424336	3.19462	1.43314
	65	1.24911	0.473756	3.63629	1.42639
	65.5	1.13767	0.507644	3.93068	1.59628
	66	1.24054	0.557779	4.35354	1.7208
	66.5	1.36605	0.529139	4.85709	2.13141
	67	1.57335	0.578563	5.06868	2.21769
	67.5	1.50074	0.610343	5.34519	2.50988
	68	1.83017	0.691181	5.56912	2.78762
	68.5	2.00738	0.767962	6.00861	2.84388
	69	2.30883	0.93499	6.57357	3.155
	69.5	2.59158	1.00409	6.75937	3.18251
	70	2.75169	1.01029	7.11777	3.37086
	70.5	3.22965	1.13232	7.5773	3.42412
	71	3.49602	1.25239	7.81849	3.51537
	71.5	3.69699	1.36368	8.46843	3.6742
	72	3.84446	1.39926	8.82098	3.81777
	72.5	4.01276	1.45099	9.20926	3.82894
	73	4.37621	1.48208	9.72036	3.83086
	73.5	4.72443	1.62272	10.3683	3.7488
	74	5.04971	1.63986	10.9759	3.72422
	74.5	5.25806	1.72199	11.4856	3.62986
	75	5.51626	1.84662	11.8075	3.64309
	75.5	5.75971	1.92306	12.5702	3.52868
	76	5.97541	1.9773	13.1915	3.4823
	76.5	6.37825	1.99645	13.7315	3.43347
	77	6.7099	2.16125	14.3854	3.45136
	77.5	7.13874	2.18439	15.0011	3.34696
	78	7.49553	2.2578	15.4205	3.27924
	78.5	7.89389	2.17932	15.862	3.29475
	79	8.116	2.22753	16.3996	3.30196
	79.5	8.6923	2.35705	16.8061	3.26625
	80	8.94901	2.37661	17.2881	3.2477
	80.5	9.17735	2.37933	17.6986	3.16976
	81	9.8964	2.3872	18.2019	3.15803
	81.5	10.3799	2.43038	18.4321	3.13546
	82	10.8267	2.39736	18.5584	3.16421
	82.5	11.202	2.40237	19.0732	2.95793
	83	11.8161	2.34627	19.4066	2.98359
	83.5	12.1973	2.3043	19.9645	2.68803
	84	12.578	2.24534	20.2847	2.57301
	84.5	13.0257	2.21306	20.6226	2.29553
	85	13.5087	2.21255	21.0459	2.16198
	85.5	13.8062	2.19343	21.5043	1.81199
	86	14.0662	2.20332	22.1113	1.53669
	86.5	14.5591	2.17191	22.3666	1.57293
	87	14.6325	2.15748	22.6267	1.43004
	87.5	14.9062	2.13928	22.7572	1.25934
	88	15.2054	2.05897	22.7442	1.1475
	88.5	15.462	1.98085	22.8566	1.08513
	89	15.8834	1.99551	22.8759	1.01375
	89.5	16.1028	1.98744	23.0642	0.9854
	90	16.7098	1.89481	23.0676	0.975384
	90.5	17.0469	1.96242	23.2961	0.946169
	91	17.5575	2.00677	23.2841	0.924917
	91.5	18.1451	2.09582	23.4541	0.919907
	92	18.5296	1.98196	23.5471	0.96716
	92.5	18.8157	2.03474	23.5181	0.934128
	93	19.0112	2.00317	23.4274	0.927994
	93.5	19.1896	1.88349	23.4139	0.986116
	94	19.3451	1.76762	23.4646	0.973801
	94.5	19.5803	1.5922	23.4425	0.96993
	95	19.701	1.56277	23.776	0.932019
	95.5	19.99	1.48389	23.7907	0.888923
	96	19.7422	1.24992	23.7217	0.85126
	96.5	20.0811	1.1641	23.6597	0.830762
	97	20.0838	1.04468	23.6626	0.787147
	97.5	20.1755	1.01311	23.6834	0.803859
	98	20.2973	1.03647	23.6356	0.828673
	98.5	20.448	1.01331	23.565	0.814862
	99	20.7769	1.09635	23.7139	0.84488
	99.5	20.9189	1.12991	23.8075	0.759306
	100	20.9659	1.11438	23.6894	0.869456
	100.5	21.0332	1.10968	23.7823	0.783609
	101	21.027	1.08868	23.9025	0.832906
	101.5	21.2554	1.10024	23.9419	0.789987
	102	21.4346	1.09927	23.7717	0.826274
	102.5	21.4211	1.09691	23.654	0.777597
	103	21.5083	1.08613	23.6372	0.771951
	103.5	21.4615	1.06144	23.7271	0.753736
	104	21.2353	1.05797	23.6811	0.700314
	104.5	21.3933	1.13612	23.7416	0.626961
	105	21.3677	1.21471	23.8888	0.598061
	105.5	21.5545	1.23126	23.7202	0.665727
	106	21.5955	1.21251	23.797	0.684829
	106.5	21.6493	1.21631	23.7379	0.619094
	107	21.6041	1.21723	23.4989	0.656688
	107.5	21.6066	1.18985	23.53	0.6624
	108	21.5586	1.19292	23.4416	0.669053
	108.5	21.6888	1.08808	23.309	0.668126
	109	21.5149	1.19523	23.3147	0.724497
	109.5	21.6974	1.14606	23.4393	0.841731
	110	21.6912	1.16244	23.2249	0.793481
	110.5	21.5317	1.14782	23.1244	0.779358
	111	21.5328	1.21339	23.0927	0.798527
	111.5	21.5823	1.22297	23.1151	0.812692
	112	21.6089	1.18983	22.9555	0.81568
	112.5	21.4373	1.19639	23.0865	0.829158
	113	21.5069	1.20341	23.0467	0.82905
	113.5	21.5944	1.15405	22.9108	0.857218
	114	21.4569	1.14867	22.9748	0.840766
	114.5	21.5195	1.1864	22.8464	0.840209
	115	21.5993	1.18548	22.7937	0.88623
	115.5	21.6385	1.16171	22.8221	0.877289
	116	21.6383	1.19289	22.6521	0.744944
	116.5	21.6997	1.26398	22.6117	0.705783
	117	21.6328	1.20013	22.4994	0.650626
	117.5	21.7552	1.15646	22.5823	0.692592
	118	21.7476	1.232	22.7409	0.752166
	118.5	21.7248	1.23156	22.6382	0.805414
	119	21.6259	1.21937	22.5984	0.764836
	119.5	21.4906	1.24597	22.564	0.792119
	120	21.5132	1.24425	22.4978	0.866524
	120.5	21.5283	1.28862	22.5513	0.881186
	121	21.6906	1.32903	22.5308	0.831096
	121.5	21.7487	1.36942	22.6122	0.828216
	122	21.7581	1.32292	22.5745	0.810642
	122.5	21.6956	1.31371	22.5562	0.791489
	123	21.6433	1.29501	22.559	0.778214
	123.5	21.5112	1.23899	22.4921	0.788773
	124	21.4414	1.2077	22.4633	0.84755
	124.5	21.5713	1.18708	22.2638	0.764505
	125	21.6474	1.16932	22.2423	0.814508
	125.5	21.605	1.14665	22.1757	0.773189
	126	21.5113	1.1574	22.1242	0.74183
	126.5	21.305	1.20724	22.0565	0.760655
	127	21.2595	1.22948	22.1775	0.874762
	127.5	21.3374	1.25077	22.1276	0.847643
	128	21.6068	1.21295	22.1047	0.948438
	128.5	21.5213	1.20586	21.9829	0.986249
	129	21.4774	1.20616	21.97	0.993051
	129.5	21.2015	1.23545	21.6828	0.884781
	130	21.255	1.18267	21.6537	0.948103
	130.5	21.2076	1.24222	21.578	0.873387
	131	21.1743	1.25107	21.4097	0.959597
	131.5	21.1078	1.23577	21.4949	1.06373
	132	21.2337	1.23881	21.4443	1.11394
	132.5	21.0967	1.28946	21.4934	1.16244
	133	21.1639	1.29402	21.4592	1.18801
	133.5	21.0565	1.28595	21.1879	1.12458
	134	21.3165	1.23533	21.2094	1.09622
	134.5	21.4468	1.21962	21.2302	1.07179
	135	21.4548	1.15253	21.1222	1.02621
	135.5	21.4333	1.14915	21.353	0.963658
	136	21.508	1.18797	21.4392	1.00409
	136.5	21.2678	1.18446	21.544	0.994788
	137	21.386	1.16222	21.4452	1.00383
	137.5	21.2531	1.17024	21.3099	1.08703
	138	21.0634	1.24172	21.2684	1.11004
	138.5	21.1183	1.25187	21.3007	1.08137
	139	21.1024	1.27515	21.075	1.14852
	139.5	21.1685	1.27595	20.9156	1.25621
	140	21.1169	1.29522	20.7815	1.19193
	140.5	21.1408	1.27474	20.7501	1.18668
	141	21.0637	1.23692	20.7405	1.13588
	141.5	21.0008	1.24778	20.907	1.18493
	142	21.0058	1.23258	21.0867	1.14215
	142.5	21.2858	1.21243	21.1618	1.06984
	143	21.3082	1.20611	20.8736	1.15748
	143.5	21.3648	1.22625	21.0707	1.20813
	144	21.2814	1.19527	20.8954	1.1721
	144.5	21.1217	1.24637	20.7613	1.22544
	145	20.9987	1.25094	20.7018	1.25397
	145.5	21.0219	1.25853	20.7932	1.27433
	146	21.152	1.23123	20.7514	1.23518
	146.5	21.3083	1.24335	20.6143	1.2295
	147	21.1751	1.21884	20.709	1.16851
	147.5	21.3114	1.21651	20.6004	1.19144
	148	21.0517	1.19822	20.5877	1.13691
	148.5	21.014	1.1871	20.442	1.15306
	149	21.089	1.17722	20.4558	1.20124
	149.5	21.2175	1.20539	20.5128	1.22659
	150	21.1568	1.20781	20.5317	1.1712
	150.5	21.2361	1.23575	20.5093	1.27877
	151	21.2796	1.20281	20.3249	1.23506
	151.5	21.2911	1.20561	20.1825	1.2926
	152	21.1074	1.12587	19.891	1.27967
	152.5	21.1932	1.17735	19.7909	1.42555
	153	21.1412	1.16074	19.7	1.39669
	153.5	21.0984	1.17457	19.7058	1.53483
	154	20.9506	1.21768	19.8125	1.58072
	154.5	21.059	1.24889	19.9845	1.5853
	155	21.1446	1.21224	19.9482	1.52969
	155.5	21.1863	1.20976	20.0593	1.50251
	156	21.3055	1.20424	20.0757	1.50114
	156.5	21.408	1.21429	20.1263	1.48318
	157	21.5838	1.21845	20.295	1.48301
	157.5	21.4759	1.23576	20.2707	1.45049
	158	21.5494	1.24848	20.2669	1.44877
	158.5	21.376	1.24868	20.0856	1.45652
	159	21.3735	1.28242	19.9871	1.43686
	159.5	21.2221	1.29452	19.837	1.39519
	160	21.268	1.245	19.9247	1.42117
	160.5	21.3338	1.26815	19.8278	1.48696
	161	21.3856	1.26679	19.8285	1.51944
	161.5	21.2821	1.32592	19.7788	1.45041
	162	21.1394	1.32226	19.8428	1.45388
	162.5	21.1046	1.34373	19.7533	1.45824
	163	21.0255	1.27253	19.8273	1.4357
	163.5	21.1411	1.20017	20.1004	1.39186
	164	21.1703	1.22985	20.1043	1.5744
	164.5	21.2024	1.20719	20.2092	1.47372
	165	21.3804	1.23466	20.1907	1.5091
	165.5	21.4361	1.18444	20.1289	1.42791
	166	21.5044	1.23314	20.1089	1.41586
	166.5	21.435	1.20985	20.2305	1.46195
	167	21.2875	1.20884	19.9949	1.4996
	167.5	21.2957	1.19212	20.0889	1.5523
	168	21.4049	1.26333	20.0114	1.57099
	168.5	21.4085	1.29245	20.0907	1.60297
	169	21.5344	1.24444	19.9565	1.56157
	169.5	21.5393	1.26908	19.9098	1.59915
	170	21.5299	1.17821	19.8407	1.57239
	170.5	21.1812	1.21529	19.7891	1.55865
	171	21.3388	1.15702	19.7195	1.58199
	171.5	21.3017	1.18604	19.6304	1.61988
	172	21.4575	1.17825	19.6735	1.66776
	172.5	21.4579	1.21553	19.647	1.72356
	173	21.5254	1.18072	19.7381	1.78099
	173.5	21.3371	1.19035	19.6928	1.77824
	174	21.4547	1.11289	19.8098	1.7434
	174.5	21.2733	1.20013	19.8146	1.58825
	175	21.4084	1.14347	19.8266	1.57391
	175.5	21.4011	1.18829	19.8529	1.62543
	176	21.4526	1.11713	19.8789	1.68462
	176.5	21.4814	1.17554	19.656	1.81437
	177	21.586	1.18852	19.7232	1.85519
	177.5	21.6036	1.20019	19.7047	1.86269
	178	21.7142	1.17848	19.7291	1.90763
	178.5	21.6756	1.18874	19.6821	1.9382
	179	21.6642	1.19467	19.4802	1.90771
	179.5	21.5868	1.20559	19.3647	1.94256
	180	21.5393	1.2022	19.4346	1.94989
	180.5	21.4649	1.24433	19.5703	1.85688
	181	21.5031	1.26084	19.7729	1.91692
	181.5	21.6531	1.25074	19.7881	1.88185
	182	21.7393	1.23601	19.8408	1.91065
	182.5	21.8609	1.2418	19.5506	1.8583
	183	21.8941	1.23977	19.6143	1.94925
	183.5	21.9617	1.25378	19.5397	1.95267
	184	22.2055	1.35707	19.59	2.03987
	184.5	22.1668	1.38161	19.5793	1.99364
	185	22.0786	1.40396	19.6763	2.04079
	185.5	21.9292	1.34019	19.6447	1.926
	186	22.011	1.42853	19.602	1.9373
	186.5	21.8033	1.3375	19.6317	1.92605
	187	21.6775	1.35747	19.6001	1.92134
	187.5	21.7774	1.34629	19.4592	1.97826
	188	21.6035	1.29908	19.3885	2.04899
	188.5	21.5122	1.29498	19.3784	2.01064
	189	21.8961	1.22431	19.324	2.10418
	189.5	21.8862	1.22411	19.4478	2.17107
	190	21.8611	1.15865	19.3616	2.1237
	190.5	21.8507	1.2599	19.4534	2.25817
	191	21.9802	1.29454	19.4318	2.2928
	191.5	21.8888	1.33604	19.2424	2.29998
	192	22.2369	1.48539	19.1476	2.30119
	192.5	22.3367	1.53093	19.2154	2.30006
	193	22.4804	1.53258	19.0151	2.25486
	193.5	22.5861	1.48459	19.0462	2.23686
	194	22.5071	1.44672	18.9694	2.22958
	194.5	22.3355	1.39025	19.15	2.31434
	195	22.2106	1.35306	19.0382	2.38085
	195.5	22.0286	1.32175	19.0088	2.4271
	196	21.9107	1.33479	18.6338	2.36825
	196.5	22.0036	1.38945	18.6067	2.43189
	197	22.1107	1.39224	18.6502	2.47165
	197.5	22.1196	1.37407	18.6663	2.42475
	198	22.1362	1.34119	18.7917	2.42299
	198.5	22.1924	1.27492	18.8813	2.49262
	199	22.1548	1.2512	18.9455	2.50274
	199.5	22.0465	1.24143	18.7235	2.50221
	200	21.7713	1.30978	18.7386	2.53383
	200.5	21.8516	1.31718	18.7209	2.54437
	201	21.8431	1.35319	18.7508	2.56906
	201.5	21.77	1.35039	18.8159	2.59195
	202	21.7572	1.35782	18.7979	2.60147
	202.5	21.801	1.35312	18.8019	2.58349
	203	22.0229	1.38312	18.7103	2.64939
	203.5	21.8289	1.28145	18.7502	2.6319
	204	21.8815	1.28534	18.6274	2.60807
	204.5	21.7697	1.25091	18.7225	2.62414
	205	21.7446	1.29646	18.6366	2.63418
	205.5	21.6657	1.28343	18.6103	2.57495
	206	22.0431	1.25948	18.4449	2.58941
	206.5	22.0691	1.29927	18.5224	2.59522
	207	22.2339	1.27929	18.4541	2.66352
	207.5	22.1023	1.33105	18.4178	2.67176
	208	22.2714	1.32868	18.3798	2.67262
	208.5	22.1696	1.35262	18.4016	2.80091
	209	22.4355	1.41321	18.3028	2.81985
	209.5	22.4687	1.4598	18.1627	2.96294
	210	22.614	1.41352	18.2153	3.00703
	210.5	22.571	1.46474	18.1028	3.02884
	211	22.744	1.4594	17.9708	3.00825
	211.5	22.7128	1.47204	18.0551	3.04252
	212	22.7335	1.4483	18.0574	2.96037
	212.5	22.8138	1.42709	18.164	2.96796
	213	22.8781	1.4444	18.2912	2.92261
	213.5	22.7961	1.44288	18.4231	2.83964
	214	22.7899	1.50828	18.3612	2.83808
	214.5	22.8631	1.4631	18.4998	2.85508
	215	22.8422	1.43585	18.2485	2.98794
	215.5	22.7579	1.42407	18.236	2.97052
	216	22.6936	1.45015	18.3782	3.06524
	216.5	22.7502	1.44338	18.3612	3.13551
	217	22.8855	1.47312	17.9836	3.15355
	217.5	22.9063	1.50366	18.1726	3.20551
	218	23.0178	1.49916	17.8928	3.28901
	218.5	23.1273	1.44369	17.9305	3.27859
	219	22.6066	1.26034	17.8039	3.15436
	219.5	22.4906	1.19319	17.7897	3.12335
	220	22.3896	1.24743	17.7013	3.14146
	220.5	22.307	1.28132	17.8905	3.10589
	221	22.3734	1.30215	17.9295	3.09808
	221.5	22.3748	1.28169	18.0006	2.987
	222	22.356	1.24192	18.0615	3.08425
	222.5	22.2982	1.29749	18.139	3.10704
	223	22.3527	1.31829	18.1197	3.06925
	223.5	22.4154	1.24679	17.9726	3.15829
	224	22.4706	1.28028	17.9637	3.15901
	224.5	22.4163	1.28949	17.7906	3.23599
	225	22.44	1.292	17.7806	3.21549
	225.5	22.5133	1.22236	17.8441	3.21146
	226	22.3559	1.24536	17.8555	3.35311
	226.5	22.1804	1.27223	17.9948	3.3851
	227	22.1735	1.25188	17.9495	3.35119
	227.5	22.0367	1.24	17.8954	3.39901
	228	22.1337	1.24775	17.8718	3.42331
	228.5	22.2664	1.26779	18.0285	3.44963
	229	22.3408	1.25931	17.9074	3.46906
	229.5	22.2716	1.29736	17.9355	3.48098
	230	22.4388	1.34565	17.9953	3.54716
	230.5	22.502	1.34167	18.0247	3.53257
	231	22.4829	1.37467	18.0599	3.4964
	231.5	22.0872	1.26079	18.2496	3.54356
	232	22.1564	1.27058	18.2368	3.61298
	232.5	22.1788	1.24982	18.1886	3.66729
	233	22.3435	1.25076	18.0952	3.69614
	233.5	22.5156	1.22952	17.9853	3.64987
	234	22.6495	1.21375	17.9147	3.75361
	234.5	22.6185	1.21194	17.8944	3.76074
	235	22.5088	1.27439	17.8168	3.75643
	235.5	22.4625	1.27132	17.9683	3.81574
	236	22.3439	1.25779	17.8786	3.87046
	236.5	22.3653	1.31738	17.8401	3.9042
	237	22.3563	1.29247	17.8026	3.87514
	237.5	22.2879	1.3227	17.6821	3.88451
	238	22.3092	1.3122	17.7562	3.90343
	238.5	22.3425	1.30618	17.943	3.83288
	239	22.2958	1.29752	17.978	3.84972
	239.5	22.26	1.35106	18.0826	3.82571
	240	22.4458	1.33781	18.1331	3.7804
	240.5	22.4875	1.34108	18.2626	3.72852
	241	22.4849	1.35883	18.1515	3.70682
	241.5	22.6755	1.42399	18.1351	3.7337
	242	22.7169	1.44162	18.1965	3.81804
	242.5	22.5926	1.36008	18.0418	3.78004
	243	22.6556	1.44248	18.0223	3.79132
	243.5	22.6494	1.44501	18.0306	3.78844
	244	22.481	1.39539	18.0461	3.77754
	244.5	22.5732	1.40993	18.0336	3.77286
	245	22.4469	1.39417	17.9427	3.75133
	245.5	22.4976	1.40611	17.8307	3.74946
	246	22.5048	1.37938	17.877	3.74275
	246.5	22.4615	1.37723	17.8664	3.74531
	247	22.5201	1.31389	17.8825	3.74303
	247.5	22.5301	1.29935	17.8825	3.74303
	248	22.5301	1.29935	17.8825	3.74303
	248.5	22.5206	1.30285	17.8825	3.74303
	249	22.36	1.38567	17.8825	3.74303
	249.5	22.1778	1.51311	17.8825	3.74303

## Sheet: Fig.S6d
	Time traces						Slope
		Control (unpaired)		1x			Control (unpaired)	1x
	Time (s)	Mean	SEM	Mean	SEM		1.57675	1.5184
	0	0.0280238	0.192274	-0.174713	0.0864235		1.4778	1.8508
	0.5	-0.00624342	0.202318	-0.295788	0.157624		1.35995	1.38236
	1	-0.0259501	0.219968	-0.373408	0.160927		1.67635	1.45015
	1.5	0.0213039	0.204615	-0.56103	0.119123		1.03929	1.4146
	2	0.0384855	0.163468	-0.388287	0.143925		1.4087	0.97495
	2.5	-0.0220506	0.110689	-0.340517	0.119307		0.952305	0.97495
	3	-0.0506642	0.118967	-0.338018	0.103897		1.3147	1.2314
	3.5	-0.0229182	0.118671	-0.235369	0.122118			1.4523
	4	0.0886043	0.143858	-0.272697	0.0883731
	4.5	0.216635	0.190767	-0.372056	0.119726
	5	0.13337	0.217109	-0.332181	0.105575
	5.5	0.0883994	0.202691	-0.369766	0.149286
	6	0.134327	0.195876	-0.391342	0.123346
	6.5	0.192833	0.237351	-0.284565	0.146181
	7	0.253546	0.209139	-0.318281	0.137009
	7.5	0.27779	0.179172	-0.267855	0.189408
	8	0.163849	0.252988	-0.215658	0.127659
	8.5	0.107578	0.21003	-0.135994	0.133976
	9	0.125511	0.14914	-0.163526	0.114672
	9.5	0.0173899	0.159625	-0.0419524	0.112424
	10	-0.0728335	0.175213	-0.128728	0.119185
	10.5	0.0143825	0.163402	-0.253716	0.0930241
	11	0.0257268	0.167587	-0.105075	0.0893409
	11.5	0.103135	0.177014	-0.353235	0.118141
	12	0.140984	0.138389	-0.349941	0.102162
	12.5	0.187434	0.134208	-0.221345	0.129882
	13	0.0932509	0.152502	-0.124911	0.0636474
	13.5	0.205716	0.164061	-0.39861	0.136401
	14	0.163083	0.163278	-0.203107	0.150931
	14.5	0.13342	0.194966	-0.223847	0.119
	15	0.0657641	0.171705	-0.175555	0.0695778
	15.5	-0.00242072	0.210108	-0.255753	0.0966072
	16	-0.0120341	0.199264	-0.229599	0.119911
	16.5	0.079755	0.171063	-0.104346	0.134328
	17	-0.085688	0.124324	-0.215572	0.183858
	17.5	-0.048536	0.122517	0.0104291	0.154618
	18	-0.0131931	0.129558	-0.0883922	0.161696
	18.5	-0.0421876	0.147592	-0.00499013	0.157132
	19	0.0461597	0.13739	-0.0558916	0.151978
	19.5	0.0439675	0.125333	-0.112038	0.161207
	20	0.0666473	0.116635	-0.137931	0.0983718
	20.5	0.0853676	0.130397	0.08513	0.125121
	21	0.129948	0.076727	0.0505924	0.0900133
	21.5	0.215195	0.108537	0.135561	0.199924
	22	0.172884	0.138632	0.110217	0.195781
	22.5	0.323928	0.212328	-0.174755	0.0928615
	23	0.345478	0.213364	-0.211504	0.117271
	23.5	0.170437	0.245298	-0.119421	0.0891643
	24	0.117032	0.175695	-0.0801121	0.0787635
	24.5	0.101193	0.181075	0.141985	0.0713542
	25	0.11024	0.162369	0.129048	0.122065
	25.5	-0.00341874	0.134279	0.0120561	0.124999
	26	-0.0135207	0.132043	-0.161749	0.111864
	26.5	0.0981744	0.122559	-0.0936027	0.122702
	27	0.254777	0.116819	-0.0951274	0.108976
	27.5	0.207935	0.175765	-0.0274544	0.107604
	28	0.0713825	0.15046	0.187683	0.0937975
	28.5	0.00283289	0.200775	0.270975	0.0583496
	29	-0.186375	0.198025	0.365836	0.111767
	29.5	-0.173796	0.159118	0.340797	0.0746457
	30	-0.0651654	0.167406	0.155461	0.155332
	30.5	-0.0789497	0.182466	0.122294	0.126996
	31	-0.146306	0.156245	0.2571	0.0935173
	31.5	-0.10242	0.130029	0.295825	0.100278
	32	-0.0666027	0.190718	0.130413	0.0929569
	32.5	-0.0310557	0.153061	0.161054	0.101814
	33	-0.0651327	0.156475	0.20455	0.105993
	33.5	-0.00481633	0.126921	0.147213	0.13178
	34	0.0648792	0.10228	0.329407	0.0949694
	34.5	0.0445262	0.111408	0.388748	0.0832757
	35	0.0255422	0.185564	0.330501	0.0885791
	35.5	-0.0278631	0.179078	0.211312	0.114215
	36	-0.0639783	0.181811	0.281505	0.106532
	36.5	-0.0867341	0.173142	0.254984	0.120284
	37	-0.0639376	0.161774	0.204298	0.13029
	37.5	0.17217	0.142687	0.131622	0.138088
	38	0.122454	0.206814	0.123854	0.110897
	38.5	0.0029775	0.241391	0.245004	0.14857
	39	-0.131719	0.307128	0.281634	0.168059
	39.5	-0.0884521	0.219914	0.35885	0.112944
	40	-0.2015	0.172625	0.463403	0.0793014
	40.5	-0.251243	0.132398	0.329801	0.131602
	41	-0.241587	0.167062	0.11844	0.142969
	41.5	-0.0688101	0.185959	0.15266	0.173032
	42	-0.0942083	0.179525	0.069504	0.135723
	42.5	-0.0969749	0.134279	0.0474408	0.127837
	43	-0.19668	0.136	0.098499	0.134885
	43.5	0.0391962	0.13321	0.191442	0.0829933
	44	-0.0276399	0.133614	0.057975	0.0895177
	44.5	0.0132789	0.0911338	0.123962	0.149606
	45	-0.0249259	0.0731074	0.0715951	0.162187
	45.5	0.0247017	0.093696	-0.0882765	0.135801
	46	-0.0371479	0.091905	-0.0441775	0.195831
	46.5	-0.140978	0.110354	0.0703243	0.205816
	47	-0.139972	0.108524	0.14814	0.174694
	47.5	-0.170994	0.0811163	0.193313	0.181312
	48	-0.191969	0.103481	0.141506	0.174897
	48.5	-0.256303	0.106659	0.0121527	0.156595
	49	-0.117236	0.121605	-0.0349655	0.195032
	49.5	-0.334404	0.161673	0.000293741	0.169361
	50	-0.178742	0.124355	0.08733	0.178859
	50.5	-0.261968	0.169979	0.232857	0.12557
	51	-0.0710207	0.126657	0.312368	0.148719
	51.5	-0.142486	0.131263	0.400718	0.160352
	52	-0.0591369	0.140181	0.323858	0.226275
	52.5	-0.182631	0.148051	0.356135	0.162187
	53	-0.0510823	0.151502	0.277302	0.194666
	53.5	0.0516684	0.198444	0.185748	0.229977
	54	0.0618643	0.281596	0.177095	0.263114
	54.5	0.300212	0.246169	-0.0530031	0.227964
	55	0.590475	0.277259	0.0100716	0.262505
	55.5	0.318291	0.239306	0.150044	0.252825
	56	0.307205	0.2715	0.201946	0.244682
	56.5	0.239885	0.163661	0.0710907	0.237451
	57	0.417079	0.176778	0.0212354	0.145993
	57.5	0.271465	0.245027	-0.0382882	0.184537
	58	0.328548	0.315254	0.0110305	0.236783
	58.5	0.723363	0.600532	0.0968291	0.326455
	59	0.217608	0.806261	0.136993	0.467804
	59.5	0.00892126	0.779833	0.681564	0.455718
	60	0.33127	0.604353	0.797522	0.491525
	60.5	0.183806	0.308084	0.689282	0.440486
	61	0.182687	0.395688	0.846437	0.271947
	61.5	0.194321	0.334752	0.751544	0.271723
	62	0.174622	0.338899	0.821401	0.389857
	62.5	0.217978	0.346153	0.78336	0.304695
	63	0.267758	0.35222	0.854776	0.332697
	63.5	0.313102	0.378566	0.929675	0.339241
	64	0.314807	0.359325	1.09525	0.390952
	64.5	0.517072	0.318657	1.24792	0.411039
	65	0.774715	0.273944	1.50418	0.542965
	65.5	0.963603	0.399917	1.72799	0.655384
	66	0.660182	0.432993	1.79011	0.704547
	66.5	0.935077	0.467295	2.14783	0.809812
	67	1.30088	0.53612	2.18307	0.843379
	67.5	1.45507	0.582517	2.45542	0.928709
	68	1.42707	0.608105	2.60736	0.9841
	68.5	1.77371	0.682196	2.73596	1.09095
	69	2.02184	0.761543	3.0012	1.27314
	69.5	2.29994	0.787705	3.07193	1.36708
	70	2.83792	0.982707	3.17696	1.36687
	70.5	2.99466	1.06174	3.70598	1.43892
	71	3.17663	1.13735	4.15632	1.66902
	71.5	3.43131	1.24272	4.44847	1.66918
	72	3.67932	1.34682	4.67715	1.73749
	72.5	4.07735	1.50967	4.94585	1.85269
	73	4.3635	1.59145	5.24057	1.98537
	73.5	4.92569	1.66415	5.69918	2.09134
	74	5.31207	1.82687	6.03516	2.14704
	74.5	5.74011	1.88041	6.21833	2.26509
	75	6.33693	2.05548	6.68395	2.3848
	75.5	6.60191	2.08801	7.12175	2.53685
	76	7.09424	2.28746	7.28247	2.60639
	76.5	7.86066	2.27426	7.48389	2.70658
	77	8.17244	2.29959	7.94881	2.77772
	77.5	8.8785	2.36995	8.21791	2.85098
	78	9.34195	2.42898	8.60686	2.8897
	78.5	9.74142	2.48709	8.91441	2.94478
	79	9.81693	2.52677	9.35011	2.96093
	79.5	10.2649	2.51785	9.68451	3.05383
	80	11.0309	2.55376	9.86586	3.10131
	80.5	11.2447	2.58215	10.4427	3.10372
	81	11.6216	2.54491	10.7698	3.09501
	81.5	11.9858	2.60959	11.1846	3.0402
	82	12.3021	2.56267	11.5161	2.98498
	82.5	13.0538	2.51035	11.9776	2.95639
	83	13.4873	2.39968	12.2853	2.98547
	83.5	13.9402	2.2808	12.7171	3.02001
	84	14.4513	2.25959	13.2757	3.00082
	84.5	14.9604	2.2327	13.6387	2.88562
	85	15.6818	2.12121	14.5256	2.80505
	85.5	15.9099	2.06146	15.1932	2.75646
	86	16.3878	2.01305	15.7911	2.59621
	86.5	16.7312	1.82759	16.2417	2.46808
	87	17.2656	1.79417	16.7346	2.44425
	87.5	17.5601	1.78796	17.3732	2.33229
	88	17.914	1.71493	17.905	2.15699
	88.5	18.4023	1.65407	18.3205	2.01238
	89	18.6986	1.62871	18.7822	1.92303
	89.5	18.7964	1.51304	19.3733	1.83715
	90	19.1249	1.36127	19.7867	1.7567
	90.5	19.4626	1.37691	20.2351	1.48124
	91	19.6943	1.22803	20.4492	1.44336
	91.5	19.9347	1.12915	21.006	1.19835
	92	20.08	1.16101	21.3004	1.13247
	92.5	20.3956	1.13265	21.6279	0.967452
	93	20.5699	1.06283	21.9733	0.896709
	93.5	20.8332	1.02254	22.1928	0.874123
	94	20.9141	0.989955	22.4808	0.773743
	94.5	21.167	0.895126	22.7436	0.772268
	95	21.2405	0.874108	23.0505	0.803467
	95.5	21.4909	0.888091	23.4321	0.767693
	96	21.4276	0.898509	23.4781	0.697416
	96.5	21.4315	0.915958	23.7191	0.724102
	97	21.8701	0.786956	23.814	0.682088
	97.5	21.8636	0.760729	24.0014	0.676067
	98	22.1799	0.759435	24.1864	0.651332
	98.5	22.2058	0.781374	24.2823	0.619964
	99	22.2321	0.775529	24.3118	0.584324
	99.5	22.3546	0.795224	24.5301	0.519003
	100	22.5904	0.849076	24.4647	0.55222
	100.5	22.5899	0.847787	24.4681	0.600925
	101	22.4965	0.843647	24.5528	0.625261
	101.5	22.4631	0.814272	24.6445	0.699597
	102	22.3006	0.796988	24.7082	0.71344
	102.5	22.3939	0.788282	24.8651	0.684969
	103	22.2874	0.747639	24.815	0.630766
	103.5	22.2766	0.764042	24.8899	0.584625
	104	22.2314	0.820269	25.0457	0.597265
	104.5	22.3035	0.870799	25.0593	0.572129
	105	22.2465	0.838675	25.0745	0.628525
	105.5	22.2618	0.84479	24.9074	0.662089
	106	22.1481	0.783395	25.0293	0.697327
	106.5	22.0678	0.772157	25.1396	0.694584
	107	22.0838	0.749719	25.1307	0.715385
	107.5	21.9007	0.786491	25.1294	0.740268
	108	21.8497	0.761144	24.972	0.731477
	108.5	21.798	0.844945	24.88	0.733151
	109	21.9209	0.846883	25.1791	0.761327
	109.5	21.9731	0.823569	24.9041	0.715217
	110	21.9114	0.850559	24.9122	0.722502
	110.5	21.9114	0.866404	25.1922	0.654229
	111	21.782	0.854313	25.1969	0.672924
	111.5	21.9202	0.901262	25.0366	0.61268
	112	21.9482	0.904269	25.072	0.611607
	112.5	21.671	0.92433	25.1801	0.651506
	113	21.7232	0.957223	25.0005	0.662142
	113.5	21.8915	0.981406	24.8135	0.709017
	114	21.9254	0.927251	25.0261	0.701514
	114.5	22.0121	0.880999	24.9713	0.756847
	115	22.1308	0.927101	24.8699	0.714149
	115.5	22.1198	0.900163	25.0689	0.7609
	116	22.0545	0.914215	25.1986	0.832828
	116.5	21.9998	0.959751	25.2184	0.824394
	117	21.9648	0.930125	25.1766	0.866758
	117.5	21.94	0.88909	25.3322	0.831655
	118	21.921	0.851495	25.2136	0.817609
	118.5	21.9437	0.856054	25.1901	0.764744
	119	22.0074	0.887762	25.1136	0.764758
	119.5	22.1356	0.899649	25.018	0.789033
	120	22.0115	0.996712	24.9607	0.779329
	120.5	21.9985	1.02311	24.9037	0.712018
	121	22.0134	0.99924	24.9405	0.750968
	121.5	21.8568	1.0069	24.8751	0.776675
	122	21.8471	0.959698	24.9185	0.728448
	122.5	21.7677	0.905869	24.7447	0.744124
	123	21.91	0.833231	24.6673	0.757816
	123.5	21.868	0.816325	24.821	0.729422
	124	21.8803	0.860729	24.9534	0.757877
	124.5	21.8784	0.883453	24.8347	0.760634
	125	21.9482	0.887667	24.8809	0.764059
	125.5	21.7822	0.947384	25.0149	0.826705
	126	21.8465	1.01028	24.8561	0.797111
	126.5	21.7012	1.08728	24.62	0.817247
	127	21.6566	1.13023	24.6157	0.810975
	127.5	21.7969	1.1016	24.7066	0.80309
	128	21.8766	1.08444	24.781	0.827977
	128.5	21.8363	1.03618	24.8304	0.800457
	129	21.9838	1.03709	25.0704	0.733881
	129.5	22.0425	1.02473	25.0727	0.715325
	130	22.0276	1.00297	24.8277	0.737506
	130.5	21.9612	1.00859	25.0402	0.740903
	131	21.7586	1.0291	24.8427	0.736076
	131.5	21.8905	1.02071	24.7927	0.774147
	132	21.9582	1.06806	24.8576	0.752987
	132.5	21.9073	1.16531	24.6561	0.761674
	133	21.8241	1.18376	24.5829	0.773045
	133.5	21.91	1.18349	24.6529	0.798912
	134	21.7171	1.08879	24.631	0.803908
	134.5	21.7441	1.02358	24.5609	0.786449
	135	21.7926	1.00523	24.6091	0.798861
	135.5	21.963	0.925084	24.6423	0.790067
	136	22.1488	0.953666	24.6447	0.805113
	136.5	21.9183	1.08613	24.6575	0.821118
	137	21.9753	1.0516	24.5818	0.880081
	137.5	21.712	1.13968	24.5766	0.845601
	138	21.6681	1.11335	24.4007	0.913088
	138.5	21.5132	1.12281	24.3689	0.836051
	139	21.6186	1.08352	24.4228	0.877243
	139.5	21.5691	1.04798	24.2659	0.779502
	140	21.5837	1.04237	24.3857	0.841151
	140.5	21.7028	1.11984	24.4912	0.795721
	141	21.6889	1.10603	24.6202	0.823066
	141.5	21.7064	1.08152	24.7266	0.814705
	142	21.6078	1.12682	24.6633	0.890243
	142.5	21.5765	1.11705	24.549	0.913529
	143	21.5419	1.06917	24.6892	0.862722
	143.5	21.5491	1.03693	24.8233	0.850057
	144	21.3749	1.10947	24.6147	0.721761
	144.5	21.4867	1.10269	24.7699	0.742377
	145	21.6114	1.10508	24.6764	0.665022
	145.5	21.5501	1.088	24.6006	0.674902
	146	21.5506	1.13786	24.622	0.660863
	146.5	21.6421	1.08538	24.5996	0.638742
	147	21.8229	1.07929	24.5051	0.677475
	147.5	21.8986	1.0306	24.3891	0.683995
	148	21.943	1.0383	24.3383	0.734382
	148.5	22.0451	1.0482	24.324	0.706117
	149	21.9117	1.0177	24.5367	0.726665
	149.5	21.9115	1.00135	24.5067	0.740153
	150	21.7546	1.07546	24.4327	0.785204
	150.5	21.8864	1.03973	24.5146	0.788958
	151	21.6595	1.06621	24.5698	0.710903
	151.5	21.4921	1.0913	24.5716	0.690747
	152	21.5065	1.05162	24.553	0.669859
	152.5	21.6985	1.07643	24.6222	0.695409
	153	21.4871	1.07511	24.5006	0.707141
	153.5	21.5315	1.08554	24.3538	0.728875
	154	21.6105	1.09636	24.3987	0.701176
	154.5	21.545	1.10177	24.4432	0.761016
	155	21.4183	1.0747	24.6118	0.694182
	155.5	21.5993	1.07193	24.3281	0.718432
	156	21.8896	1.09226	24.4194	0.716509
	156.5	21.7372	1.08063	24.5192	0.741336
	157	21.7678	1.08977	24.7451	0.787949
	157.5	21.8018	1.10055	24.6785	0.769237
	158	21.7417	1.0801	24.6152	0.741186
	158.5	21.6265	1.03485	24.5137	0.760856
	159	21.5991	1.10393	24.3748	0.744562
	159.5	21.6161	1.08738	24.541	0.718796
	160	21.4115	1.17469	24.453	0.720921
	160.5	21.3461	1.14836	24.5251	0.729621
	161	21.3465	1.19309	24.4157	0.759593
	161.5	21.3496	1.11573	24.481	0.760804
	162	21.4423	1.17451	24.3932	0.814274
	162.5	21.4725	1.1315	24.4344	0.808753
	163	21.5793	1.12407	24.3601	0.831605
	163.5	21.5769	1.1248	24.2718	0.843655
	164	21.5635	1.12008	24.4876	0.885415
	164.5	21.5155	1.14866	24.5775	0.871439
	165	21.401	1.15125	24.6532	0.867808
	165.5	21.2941	1.10611	24.782	0.825237
	166	21.2115	1.12956	24.7383	0.801083
	166.5	21.3463	1.12004	24.6182	0.844384
	167	21.3403	1.06892	24.5636	0.806022
	167.5	21.398	1.07354	24.5811	0.76224
	168	21.5778	1.12654	24.6251	0.80301
	168.5	21.6354	1.14869	24.6582	0.781592
	169	21.6119	1.11969	24.7891	0.714046
	169.5	21.5557	1.13576	24.9499	0.79566
	170	21.6085	1.1024	24.8574	0.804473
	170.5	21.5601	1.07797	24.5421	0.623041
	171	21.3942	1.1159	24.6385	0.712643
	171.5	21.2516	1.09203	24.7558	0.729167
	172	21.1601	1.0965	24.7442	0.651869
	172.5	21.2464	1.10284	24.6398	0.698408
	173	21.3286	1.17524	24.5748	0.737325
	173.5	21.3779	1.18658	24.5602	0.753209
	174	21.3357	1.21303	24.4366	0.7527
	174.5	21.3796	1.24884	24.2077	0.722312
	175	21.5583	1.26672	24.3875	0.699623
	175.5	21.509	1.23211	24.4236	0.701921
	176	21.5329	1.14196	24.6079	0.810422
	176.5	21.6177	1.15573	24.6281	0.888735
	177	21.6614	1.21245	24.6783	0.75467
	177.5	21.5079	1.24349	24.5566	0.790716
	178	21.6709	1.26997	24.3074	0.859983
	178.5	21.6537	1.30114	24.3038	0.832573
	179	21.59	1.19801	24.4179	0.802623
	179.5	21.5155	1.19358	24.2188	0.81112
	180	21.5542	1.09303	24.7255	0.864484
	180.5	21.5099	1.04714	24.6043	0.797522
	181	21.621	1.02982	24.5822	0.848254
	181.5	21.7205	1.04666	24.6527	0.842675
	182	21.6477	0.99506	24.7679	0.818425
	182.5	21.5689	1.02902	24.566	0.821375
	183	21.557	1.02613	24.8162	0.791688
	183.5	21.5434	0.997154	24.9603	0.745115
	184	21.4115	0.957537	24.8925	0.75079
	184.5	21.6003	1.02923	24.8128	0.698247
	185	21.6484	0.995808	24.7604	0.825238
	185.5	21.7088	1.04154	24.719	0.769085
	186	21.8538	1.07625	24.545	0.824171
	186.5	21.942	1.04584	24.5742	0.749115
	187	22.0079	0.978343	24.5504	0.793979
	187.5	22.0228	1.00273	24.5913	0.735391
	188	22.1045	0.925568	24.7484	0.710346
	188.5	22.2138	0.933589	24.6632	0.793116
	189	22.1318	0.942807	24.9725	0.901574
	189.5	22.0302	0.939345	25.0041	0.876138
	190	22.2634	0.906627	24.7429	0.813271
	190.5	22.3268	0.926414	24.8146	0.873938
	191	22.2868	0.90148	24.7039	0.85279
	191.5	22.1882	0.835086	24.7093	0.830709
	192	22.3747	0.878434	24.6567	0.821393
	192.5	22.2505	0.88047	24.7342	0.774059
	193	22.3116	0.949936	24.8025	0.784112
	193.5	22.39	0.973675	24.8982	0.755116
	194	22.5529	0.978655	24.798	0.754475
	194.5	22.5596	1.00962	24.6821	0.809207
	195	22.4896	0.981063	24.786	0.847729
	195.5	22.4224	0.928031	24.8112	0.826524
	196	22.2848	0.873465	24.7974	0.833919
	196.5	22.426	0.888562	24.8574	0.816282
	197	22.5826	0.904561	24.8971	0.753952
	197.5	22.8832	0.967398	24.7425	0.780099
	198	22.9702	1.05947	24.7304	0.746874
	198.5	22.9243	1.13036	24.7719	0.761841
	199	22.9949	1.09503	24.7796	0.799746
	199.5	22.8678	1.10711	24.7958	0.803688
	200	22.7937	1.12623	24.8328	0.727674
	200.5	22.8433	1.11933	25.1689	0.734055
	201	22.701	1.10104	25.01	0.810431
	201.5	22.625	1.1125	25.094	0.813281
	202	22.6902	1.11494	25.0864	0.813053
	202.5	22.7883	1.02143	24.9785	0.885858
	203	22.8185	1.00964	24.795	0.755201
	203.5	22.7915	1.01023	24.8909	0.810777
	204	22.8913	0.938458	25.0077	0.885459
	204.5	22.765	0.910474	25.075	0.857688
	205	22.6912	0.967208	24.9095	0.830482
	205.5	22.7252	0.943132	25.0796	0.864888
	206	22.7565	0.955809	25.0836	0.854599
	206.5	22.614	0.921125	24.961	0.853491
	207	22.5075	0.934313	24.9717	0.904635
	207.5	22.3854	0.884871	24.9076	0.866466
	208	22.1105	0.926866	24.945	0.848986
	208.5	22.0617	0.901742	24.9911	0.949876
	209	22.0758	0.90868	24.8874	0.969533
	209.5	22.324	0.964845	24.9744	0.920026
	210	22.3714	0.97648	25.033	0.889227
	210.5	22.3555	0.959538	24.9164	0.855791
	211	22.5098	0.997734	24.8596	0.802773
	211.5	22.6337	1.00539	25.2172	0.905442
	212	22.4425	0.948567	25.1617	0.880107
	212.5	22.5982	0.930093	25.2153	0.863362
	213	22.7359	0.919666	25.1538	0.860033
	213.5	23.1037	1.22547	25.0896	0.91225
	214	23.2094	1.29209	25.2431	0.806707
	214.5	23.2633	1.3177	25.3983	0.778539
	215	23.3814	1.27942	25.2579	0.817182
	215.5	23.4261	1.23952	25.2547	0.858504
	216	23.3553	1.23115	25.2707	0.942847
	216.5	23.3102	1.22206	25.1771	0.94411
	217	23.3249	1.19273	25.0391	0.946775
	217.5	23.3345	1.2019	25.1385	0.816385
	218	23.4315	1.19772	25.2416	0.829123
	218.5	23.5049	1.17347	25.295	0.810831
	219	23.4671	1.20848	25.176	0.765683
	219.5	23.3657	1.24648	25.328	0.779299
	220	23.4484	1.25061	25.2324	0.713673
	220.5	23.5046	1.32613	25.2212	0.663115
	221	23.3817	1.32375	25.2872	0.674892
	221.5	23.5548	1.34005	25.2384	0.617688
	222	23.5731	1.37839	25.3117	0.643778
	222.5	23.5193	1.39445	25.3477	0.652535
	223	23.4918	1.4444	25.3469	0.672599
	223.5	23.5553	1.46388	25.2993	0.693561
	224	23.4916	1.48141	25.3815	0.74395
	224.5	23.4331	1.44278	25.4859	0.764557
	225	23.5345	1.49363	25.6824	0.832006
	225.5	23.435	1.49984	25.391	0.757178
	226	23.3985	1.46479	25.2386	0.791806
	226.5	23.4864	1.46541	25.1733	0.739102
	227	23.6059	1.3898	25.2149	0.722515
	227.5	23.8674	1.37132	24.9618	0.744975
	228	23.8933	1.38714	25.1063	0.736533
	228.5	24.0038	1.44694	25.0018	0.744181
	229	23.9235	1.48727	25.1026	0.778676
	229.5	23.8092	1.50349	25.0714	0.750158
	230	23.8217	1.58906	25.228	0.754358
	230.5	23.855	1.61287	25.3386	0.824111
	231	23.7734	1.55221	25.4068	0.818218
	231.5	23.8395	1.55646	25.3919	0.752835
	232	23.9071	1.56463	25.5329	0.798661
	232.5	23.9661	1.55052	25.3343	0.737121
	233	23.928	1.54802	25.099	0.696315
	233.5	23.7292	1.58523	25.1129	0.70321
	234	23.6684	1.62727	25.0487	0.721238
	234.5	23.6788	1.65008	24.8715	0.666463
	235	23.6729	1.64134	25.0052	0.672758
	235.5	23.6902	1.59861	25.1351	0.735809
	236	23.7388	1.59969	25.0601	0.75242
	236.5	23.8713	1.56948	25.0768	0.796622
	237	23.7759	1.52722	25.2013	0.756218
	237.5	23.6056	1.54301	25.129	0.76013
	238	23.5798	1.5314	25.2087	0.736398
	238.5	23.6248	1.54531	25.3065	0.699958
	239	23.5166	1.52701	25.4635	0.686713
	239.5	23.5855	1.4488	25.6017	0.752775
	240	23.6528	1.5127	25.6939	0.865408
	240.5	23.5722	1.45471	25.4616	0.875309
	241	23.5613	1.43313	25.3996	0.792248
	241.5	23.5022	1.52929	25.2884	0.767789
	242	23.6172	1.52381	25.2204	0.750423
	242.5	23.5895	1.48293	25.0982	0.709448
	243	23.6407	1.5131	25.252	0.774179
	243.5	23.6049	1.48923	25.3079	0.75432
	244	23.7602	1.49869	25.3792	0.789713
	244.5	23.755	1.53776	25.6588	0.808731
	245	23.7313	1.49953	25.753	0.862616
	245.5	23.6476	1.4748	25.7782	0.895044
	246	23.3977	1.55399	25.8459	0.893412
	246.5	23.4752	1.5128	25.6978	0.885342
	247	23.3372	1.58301	25.7368	0.972321
	247.5	23.2976	1.60138	25.674	0.973039
	248	23.4085	1.56196	25.6488	0.906948
	248.5	23.4844	1.58804	25.6488	0.906948
	249	23.2762	1.62571	25.5323	0.873142
	249.5	23.1345	1.61449	25.5236	0.871197

## Sheet: Fig.S6e
	Time traces						Slope
		Control (unpaired)		5x spaced			Control (unpaired)	5x spaced
	Time (s)	Mean	SEM	Mean	SEM		1.03838	1.8978
	0	-0.181621	0.100318	-0.298152	0.132471		0.95191	1.9275
	0.5	-0.209482	0.0960031	-0.342654	0.171832		1.11356	1.6178
	1	-0.125847	0.241121	-0.407476	0.175695		0.628255	1.45135
	1.5	-0.00162312	0.266567	-0.504542	0.216021		1.07755	1.6787
	2	0.0447104	0.283596	-0.471108	0.189741		1.67655	1.2797
	2.5	-0.00282532	0.275391	-0.658692	0.250264		1.30815	1.571
	3	-0.0796442	0.304261	-0.562448	0.184423
	3.5	-0.142814	0.301479	-0.554866	0.19082
	4	-0.128974	0.295725	-0.499755	0.211502
	4.5	-0.217272	0.231667	-0.507463	0.217025
	5	-0.0914021	0.213863	-0.425266	0.191229
	5.5	-0.0512763	0.242505	-0.396661	0.173443
	6	0.236917	0.169054	-0.386257	0.124403
	6.5	0.168665	0.156486	-0.33982	0.103663
	7	0.100389	0.181076	-0.297502	0.104591
	7.5	-0.0137322	0.163366	-0.298325	0.146952
	8	-0.140663	0.138948	-0.284056	0.133512
	8.5	-0.21788	0.1587	-0.397065	0.221205
	9	-0.255706	0.157413	-0.402399	0.214238
	9.5	-0.297494	0.128238	-0.375551	0.166263
	10	-0.165568	0.167137	-0.40559	0.175259
	10.5	-0.0544616	0.196654	-0.194546	0.0991078
	11	-0.0792468	0.211261	0.140598	0.185298
	11.5	-0.165086	0.15707	0.0534953	0.206115
	12	-0.225291	0.19976	-0.0157348	0.213634
	12.5	-0.19719	0.173115	-0.0243046	0.126721
	13	-0.179478	0.199744	-0.184544	0.11167
	13.5	-0.293999	0.244109	-0.150789	0.0723517
	14	-0.167222	0.213951	0.0649401	0.0976682
	14.5	-0.182893	0.209043	0.0970669	0.0860016
	15	-0.326553	0.231705	0.420046	0.24258
	15.5	-0.396905	0.165607	0.355478	0.175234
	16	-0.326108	0.150965	0.0865839	0.117204
	16.5	-0.243711	0.101043	-0.0697055	0.14667
	17	-0.360242	0.160107	-0.0395074	0.140056
	17.5	-0.227437	0.18623	-0.0562892	0.144229
	18	-0.252196	0.216229	0.0597563	0.153033
	18.5	-0.156753	0.208783	0.203646	0.127713
	19	-0.25434	0.212708	0.185871	0.126706
	19.5	-0.0225813	0.104438	0.165204	0.125917
	20	0.00992996	0.170876	-0.0545644	0.152703
	20.5	-0.0168904	0.277662	-0.0515083	0.180426
	21	0.115659	0.347687	-0.138353	0.158419
	21.5	-0.0094905	0.261257	0.0162186	0.131424
	22	-0.121144	0.306202	0.185718	0.119836
	22.5	-0.119361	0.327819	0.279736	0.109334
	23	-0.0437307	0.362737	0.217044	0.100488
	23.5	-0.0673091	0.303101	0.186325	0.126252
	24	-0.139997	0.24787	0.0362346	0.0998383
	24.5	-0.102921	0.14981	0.0472315	0.149153
	25	-0.169523	0.152226	-0.0192942	0.144912
	25.5	-0.221477	0.180322	0.000770224	0.19295
	26	-0.199239	0.184985	0.218664	0.139726
	26.5	-0.119676	0.167361	0.247604	0.143356
	27	-0.0167156	0.15448	0.0679265	0.0999511
	27.5	0.113437	0.104006	0.10386	0.0959054
	28	0.00164415	0.132878	0.176028	0.0946186
	28.5	0.120397	0.199612	0.136752	0.149404
	29	0.200502	0.214418	0.0311043	0.209521
	29.5	0.18791	0.13457	-0.0303164	0.145179
	30	0.0601697	0.114405	0.0998545	0.13537
	30.5	0.0462393	0.178276	-0.0629721	0.0903998
	31	0.041663	0.166909	-0.102216	0.110529
	31.5	0.0827607	0.120574	-0.0400193	0.154608
	32	0.105874	0.148017	-0.0398793	0.143533
	32.5	0.0832082	0.127585	-0.0853833	0.125343
	33	0.00966202	0.105592	0.0414338	0.0964998
	33.5	-0.053575	0.108892	0.11645	0.140456
	34	-0.119795	0.0997784	0.292435	0.114329
	34.5	-0.0512306	0.137242	0.287036	0.0857929
	35	-0.0575938	0.169801	0.258401	0.0875207
	35.5	0.121059	0.135539	0.154821	0.121978
	36	0.17417	0.10243	0.251931	0.0651099
	36.5	0.145164	0.0869008	0.119065	0.0987956
	37	0.0599403	0.13478	0.121365	0.0943343
	37.5	0.108101	0.159015	0.137362	0.0785606
	38	0.00154015	0.234147	0.258153	0.160409
	38.5	0.0627492	0.248475	0.356755	0.235947
	39	0.0140393	0.286261	0.333669	0.217769
	39.5	-0.142859	0.232381	0.261208	0.226578
	40	-0.150329	0.221178	0.130636	0.21368
	40.5	-0.0599263	0.244927	-0.00334118	0.155592
	41	0.0432937	0.218689	0.0987004	0.20178
	41.5	0.148728	0.209985	-0.0373134	0.185062
	42	0.303363	0.208016	0.0667019	0.136066
	42.5	0.330362	0.156081	0.126139	0.122713
	43	0.206733	0.196327	0.34028	0.116258
	43.5	0.123899	0.203793	0.333421	0.113785
	44	0.237217	0.162302	0.502834	0.122606
	44.5	0.184681	0.159825	0.575851	0.19831
	45	0.12726	0.257162	0.577963	0.192911
	45.5	0.259553	0.273011	0.428005	0.247151
	46	0.587593	0.429726	0.302959	0.203585
	46.5	0.565327	0.44311	0.268507	0.206588
	47	0.58153	0.435035	0.141384	0.21085
	47.5	0.572807	0.388428	0.182985	0.136228
	48	0.406235	0.396974	0.062773	0.130595
	48.5	0.122527	0.423463	0.198929	0.196683
	49	0.236045	0.426888	0.305594	0.138408
	49.5	0.0836276	0.388484	0.295229	0.208562
	50	0.0484342	0.360267	0.287852	0.117303
	50.5	-0.00710294	0.249592	0.362455	0.160416
	51	0.02546	0.128938	0.262912	0.232056
	51.5	0.0325828	0.131856	0.166786	0.153146
	52	0.076026	0.118313	0.167864	0.130782
	52.5	0.202738	0.151867	0.201448	0.130057
	53	0.117949	0.219279	0.151272	0.170016
	53.5	-0.203373	0.280641	0.0993799	0.184547
	54	-0.109501	0.194392	0.320904	0.218264
	54.5	-0.285156	0.196803	0.230453	0.234064
	55	-0.385508	0.186095	0.527526	0.326809
	55.5	-0.334692	0.149485	0.41444	0.364489
	56	-0.459695	0.328306	0.419153	0.242734
	56.5	-0.1998	0.374098	0.23961	0.163227
	57	-0.207197	0.397331	0.426257	0.277472
	57.5	-0.0628848	0.320874	0.187049	0.252503
	58	-0.0958017	0.308164	-0.24857	0.413589
	58.5	-0.431932	0.352675	-1.15808	0.567302
	59	-1.04403	0.649065	-1.14792	0.623619
	59.5	-0.782367	0.636759	-1.41253	0.737744
	60	-0.702194	0.647903	-0.619536	0.511404
	60.5	0.148213	0.227149	-0.468921	0.527381
	61	0.165301	0.289643	0.202387	0.335721
	61.5	0.236207	0.321743	0.334897	0.35784
	62	0.121958	0.393144	0.533711	0.497343
	62.5	0.334463	0.389763	0.789577	0.46678
	63	0.541791	0.416434	0.868164	0.463331
	63.5	0.718491	0.402655	1.04352	0.521759
	64	0.953734	0.397619	1.25273	0.702173
	64.5	1.2417	0.338554	1.41324	0.75278
	65	1.34047	0.310038	1.51659	0.996115
	65.5	1.53555	0.266457	1.67473	1.06916
	66	1.62579	0.288179	2.34954	1.01782
	66.5	1.78707	0.3007	2.95169	1.20983
	67	2.00101	0.323862	3.38461	1.28508
	67.5	2.24099	0.479318	3.93946	1.43072
	68	2.15743	0.544482	4.46617	1.63604
	68.5	2.50793	0.712265	4.88079	1.79258
	69	2.72647	0.874739	5.52155	1.94794
	69.5	2.95782	0.940998	6.46336	2.11865
	70	3.37596	1.11875	7.02208	2.12272
	70.5	3.61749	1.20908	7.72729	2.22281
	71	4.37061	1.5437	8.28358	2.41114
	71.5	4.67001	1.66063	8.77545	2.52999
	72	5.01933	1.90073	9.38745	2.56577
	72.5	5.30328	1.96862	10.3459	2.65782
	73	5.53041	2.00882	11.0712	2.85322
	73.5	5.78179	2.04295	11.924	2.88574
	74	6.33062	2.2279	12.4616	2.99024
	74.5	6.68801	2.31625	12.7712	2.91921
	75	7.18441	2.54729	13.2518	2.83596
	75.5	7.683	2.57172	14.149	2.81155
	76	8.22104	2.64351	14.7475	2.7822
	76.5	8.56128	2.71928	15.6012	2.68335
	77	8.90356	2.83927	16.3665	2.65438
	77.5	9.77295	3.14042	17.4734	2.46718
	78	10.1858	3.27004	18.1152	2.28271
	78.5	10.7175	3.34491	18.5197	2.14986
	79	10.9405	3.42587	19.1056	2.03686
	79.5	11.3295	3.45447	19.4611	1.81764
	80	11.7571	3.55081	20.0577	1.50366
	80.5	11.899	3.55011	20.4046	1.52292
	81	12.1965	3.64163	20.8379	1.42149
	81.5	12.3735	3.64844	21.1776	1.36412
	82	12.623	3.67329	21.6357	1.3857
	82.5	12.7584	3.69824	21.8162	1.32256
	83	13.0565	3.84096	22.0264	1.33609
	83.5	13.4151	3.81289	22.2164	1.3127
	84	13.8719	3.92634	22.2271	1.25562
	84.5	14.0485	3.92527	22.5934	1.25493
	85	14.0293	3.83031	22.6871	1.25138
	85.5	14.0977	3.78322	22.933	1.17527
	86	14.1581	3.76462	23.056	1.24045
	86.5	14.3509	3.79139	23.3779	1.20572
	87	14.5421	3.85897	23.4963	1.19976
	87.5	14.9914	3.83611	23.5097	1.23964
	88	15.1378	3.80389	23.3635	1.26338
	88.5	15.649	3.82294	23.2322	1.13773
	89	15.7791	3.9116	23.4449	1.09978
	89.5	16.0353	3.89017	23.3622	1.08808
	90	16.3523	3.86542	23.3642	1.10653
	90.5	16.7531	3.82269	23.6763	1.14068
	91	16.7563	3.7807	23.5211	1.28098
	91.5	16.932	3.73219	23.4441	1.18759
	92	17.2449	3.63726	23.3835	1.21673
	92.5	17.4009	3.57892	23.4241	1.19193
	93	17.7328	3.55016	23.2666	1.18027
	93.5	18.0517	3.53206	23.4286	1.14545
	94	18.148	3.46752	23.2872	1.22468
	94.5	18.1345	3.42896	23.3849	1.16052
	95	18.2991	3.32718	23.469	1.12192
	95.5	18.2591	3.2138	23.4632	1.01019
	96	18.8023	3.22735	23.3954	1.04622
	96.5	19.1627	3.19245	23.4615	1.03455
	97	19.3955	3.28044	23.4607	1.12296
	97.5	19.6802	3.18682	23.3447	1.16018
	98	19.9904	3.10815	23.2737	1.30149
	98.5	20.3282	2.91436	23.1962	1.28619
	99	20.8671	2.79938	22.9489	1.24358
	99.5	21.1735	2.67604	23.1118	1.18001
	100	21.5302	2.60552	22.9684	1.1342
	100.5	21.7012	2.44015	23.0215	1.14434
	101	21.9122	2.30748	23.0705	1.2373
	101.5	22.0184	2.15624	22.8319	1.22088
	102	22.7117	1.84503	22.8153	1.25725
	102.5	22.9794	1.71696	22.6362	1.2835
	103	23.1524	1.636	22.838	1.22892
	103.5	23.4292	1.62091	22.8181	1.18196
	104	23.5217	1.60379	22.6879	1.23182
	104.5	23.7292	1.65155	22.3561	1.29989
	105	23.7029	1.62828	22.3591	1.30506
	105.5	24.0437	1.51589	22.2226	1.32852
	106	24.1539	1.47846	22.3625	1.2653
	106.5	24.2541	1.52008	22.1792	1.28965
	107	24.2456	1.44962	22.1481	1.24516
	107.5	24.5993	1.46859	22.1091	1.23823
	108	24.6209	1.47142	21.9801	1.33665
	108.5	24.8914	1.50124	21.9634	1.31057
	109	25.0289	1.46692	22.0136	1.34026
	109.5	25.1368	1.46521	21.9532	1.37256
	110	25.1428	1.44153	22.0101	1.32679
	110.5	25.0389	1.55955	22.0073	1.35449
	111	24.8521	1.44271	22.3929	1.36145
	111.5	24.9528	1.39097	22.357	1.29024
	112	24.8865	1.33904	22.2733	1.34458
	112.5	24.9594	1.3147	22.0839	1.40444
	113	24.9643	1.26014	22.0398	1.40065
	113.5	24.8421	1.23958	21.9871	1.43008
	114	24.8062	1.27955	22.0135	1.40533
	114.5	24.6864	1.27403	22.033	1.4618
	115	24.6218	1.31189	22.3055	1.32708
	115.5	24.5705	1.28205	22.2824	1.31106
	116	24.6937	1.32079	22.2766	1.30964
	116.5	24.8321	1.31351	22.1837	1.31103
	117	24.9204	1.36945	22.1776	1.249
	117.5	24.9594	1.43068	22.1198	1.32376
	118	25.1078	1.49056	22.3309	1.34016
	118.5	25.2438	1.51943	22.2069	1.37603
	119	25.2306	1.52944	22.2468	1.41364
	119.5	25.186	1.43024	22.1835	1.45106
	120	24.9605	1.21694	22.4002	1.41147
	120.5	24.9377	1.14037	22.4653	1.44024
	121	24.815	1.08366	22.6842	1.37526
	121.5	24.725	1.03902	22.3716	1.39273
	122	24.4675	1.09887	22.1446	1.33841
	122.5	24.5196	1.09895	22.0014	1.43058
	123	24.5974	1.16633	22.0787	1.42723
	123.5	24.5511	1.31399	22.0699	1.44588
	124	24.3557	1.35358	21.9008	1.43713
	124.5	24.3614	1.36069	22.001	1.45323
	125	24.2738	1.34475	21.9888	1.49177
	125.5	24.2361	1.35366	21.9671	1.51504
	126	24.1705	1.27202	22.1112	1.44964
	126.5	24.0478	1.29139	22.1237	1.48063
	127	23.9874	1.25649	22.1347	1.36865
	127.5	24.1194	1.21763	22.0766	1.35179
	128	24.2018	1.25635	22.0643	1.38516
	128.5	24.2536	1.21343	22.0181	1.43629
	129	24.3132	1.18423	22.0684	1.47287
	129.5	24.0652	1.13128	22.1949	1.48492
	130	23.94	1.12928	22.0422	1.54886
	130.5	23.931	1.10457	21.9898	1.50734
	131	23.8914	1.20559	22.136	1.56445
	131.5	23.8104	1.22021	21.7162	1.589
	132	23.7639	1.20401	21.9911	1.61963
	132.5	23.8574	1.21756	21.849	1.4651
	133	23.7949	1.20452	21.9566	1.52817
	133.5	23.8702	1.22173	22.0548	1.56632
	134	23.8927	1.28182	22.0518	1.55218
	134.5	24.2704	1.63483	21.8331	1.54728
	135	24.3686	1.72902	21.9207	1.5957
	135.5	24.4522	1.76355	21.9608	1.55277
	136	24.377	1.6922	21.7901	1.67357
	136.5	24.3833	1.70436	21.993	1.65299
	137	24.5133	1.82011	22.0013	1.65099
	137.5	26.3155	3.73127	21.9321	1.63116
	138	26.141	3.74753	21.7261	1.56479
	138.5	26.0902	3.74198	21.8279	1.55313
	139	25.7582	3.45655	21.8388	1.4583
	139.5	24.6216	2.45562	21.8944	1.39077
	140	24.6258	2.43771	21.8366	1.33388
	140.5	24.7601	2.41194	21.9225	1.32906
	141	25.8438	3.35675	22.0138	1.37089
	141.5	25.923	3.53727	21.7318	1.42527
	142	25.7763	3.58229	21.8342	1.4601
	142.5	25.8333	3.62901	21.8232	1.44682
	143	25.7425	3.48137	21.6995	1.53713
	143.5	25.8289	3.55396	21.6285	1.53271
	144	25.8745	3.46397	21.8509	1.48516
	144.5	25.8786	3.47052	21.8794	1.43365
	145	25.7449	3.35639	21.6487	1.49943
	145.5	24.3703	2.20484	21.6986	1.49896
	146	24.3041	2.08103	21.5551	1.54687
	146.5	24.0765	2.12405	21.5347	1.53965
	147	24.1236	2.09588	21.5554	1.64428
	147.5	24.6664	2.44428	21.6367	1.6417
	148	24.6533	2.43827	21.7287	1.54617
	148.5	24.5975	2.45715	21.8679	1.54484
	149	24.2535	2.21394	21.8483	1.64167
	149.5	24.1224	2.07139	21.8986	1.53876
	150	24.014	2.12478	21.9414	1.53621
	150.5	24.0553	2.20012	21.7409	1.60943
	151	24.5586	2.6682	21.7382	1.61236
	151.5	24.5844	2.68676	21.9223	1.56545
	152	24.5252	2.70468	22.0035	1.56325
	152.5	24.6714	2.78861	22.0407	1.5385
	153	24.5133	2.81891	21.9823	1.54471
	153.5	24.3579	2.70402	21.9238	1.60224
	154	24.4188	2.61887	21.7258	1.65859
	154.5	24.5806	2.69052	21.5746	1.66142
	155	24.3265	2.52818	21.5957	1.6854
	155.5	24.3517	2.48468	21.7291	1.56653
	156	24.4928	2.53333	21.7637	1.52624
	156.5	24.5313	2.54648	21.9135	1.50486
	157	24.4714	2.55503	21.8367	1.54545
	157.5	24.6257	2.77669	21.8265	1.49735
	158	24.73	2.76818	21.7909	1.54741
	158.5	24.884	2.94018	21.7351	1.5752
	159	24.9851	2.99987	21.6587	1.63497
	159.5	25.1742	3.0772	21.7499	1.61774
	160	25.1349	3.14279	21.8099	1.63699
	160.5	25.0063	3.23259	22.0736	1.62581
	161	25.0542	3.32976	22.1413	1.67796
	161.5	24.9956	3.27124	21.9735	1.61202
	162	24.9281	3.28423	21.9261	1.61873
	162.5	24.9137	3.33533	22.0928	1.53091
	163	25.0206	3.33294	22.0125	1.61742
	163.5	25.1403	3.30089	21.9819	1.61457
	164	25.4561	3.57911	22.1704	1.49424
	164.5	25.646	3.6307	22.0213	1.53591
	165	25.6168	3.6665	21.9583	1.52972
	165.5	25.4765	3.70599	21.8233	1.57341
	166	25.1729	3.6164	21.9523	1.53795
	166.5	24.6841	3.13538	21.7888	1.58379
	167	24.7238	3.03423	22.0293	1.6015
	167.5	24.7643	2.95514	22.0654	1.6127
	168	24.7661	2.88979	22.0555	1.57055
	168.5	24.2264	2.54575	21.9944	1.58316
	169	24.3258	2.54	22.0429	1.56273
	169.5	24.4194	2.54272	21.91	1.55127
	170	24.4441	2.58427	21.8205	1.5766
	170.5	24.2439	2.4889	21.7946	1.59056
	171	24.3228	2.44638	21.8458	1.56578
	171.5	24.207	2.42926	21.9705	1.5784
	172	23.9957	2.41915	21.8574	1.54804
	172.5	24.3578	2.53239	21.6182	1.55003
	173	24.3083	2.62141	21.891	1.54782
	173.5	24.3549	2.6228	21.9445	1.56516
	174	24.4386	2.62159	21.9235	1.67257
	174.5	24.4636	2.62567	21.9303	1.65599
	175	24.3673	2.70019	21.8893	1.68446
	175.5	24.6904	2.7837	22.0901	1.6185
	176	24.5945	2.67365	21.964	1.74988
	176.5	24.5777	2.82865	21.977	1.70983
	177	24.4109	2.6538	22.0625	1.72875
	177.5	24.421	2.56041	21.9481	1.71098
	178	23.9534	2.10448	21.685	1.68505
	178.5	23.5841	1.91006	21.7466	1.67683
	179	23.3713	1.73084	21.6577	1.60714
	179.5	23.2485	1.74845	21.6162	1.63181
	180	23.3075	1.70805	21.6123	1.61712
	180.5	23.6662	1.91529	21.765	1.58254
	181	23.8755	1.97624	21.8562	1.50934
	181.5	23.8457	2.00684	21.9444	1.4928
	182	23.9326	1.95372	22.0654	1.50031
	182.5	23.8493	1.91876	22.1293	1.43948
	183	23.9132	1.95533	21.9708	1.45705
	183.5	23.8385	1.9564	21.7652	1.45359
	184	24.0318	2.1829	21.8247	1.45576
	184.5	24.1151	2.20023	21.7568	1.49228
	185	24.1693	2.22501	21.5756	1.57616
	185.5	24.0602	2.17797	21.7382	1.53642
	186	23.8972	2.06646	21.7547	1.57327
	186.5	23.8523	1.90698	21.8509	1.55419
	187	23.7416	1.87341	22.0541	1.45896
	187.5	23.3682	1.61137	22.1078	1.48339
	188	23.1759	1.49807	21.7667	1.61935
	188.5	23.126	1.43129	21.9269	1.59351
	189	22.8652	1.36818	21.9471	1.61433
	189.5	22.8726	1.30639	21.839	1.61113
	190	22.9771	1.30789	22.0216	1.5015
	190.5	23.0966	1.33775	22.1406	1.50022
	191	22.8093	1.32773	21.9717	1.59914
	191.5	23.018	1.33153	21.9653	1.54562
	192	23.0221	1.47041	21.9391	1.59159
	192.5	23.1867	1.53683	21.8695	1.55231
	193	23.1122	1.45918	21.9986	1.55219
	193.5	23.167	1.48149	22.3123	1.61674
	194	23.1216	1.44404	22.3848	1.59588
	194.5	23.143	1.4169	22.3779	1.62949
	195	23.0855	1.37353	22.2688	1.60458
	195.5	23.1124	1.38812	22.0913	1.56671
	196	23.0992	1.38644	21.8028	1.70788
	196.5	23.0571	1.45863	21.7885	1.65609
	197	23.0148	1.40466	22.0785	1.54693
	197.5	23.158	1.40062	22.0743	1.52817
	198	23.2396	1.40079	22.0424	1.51787
	198.5	23.2822	1.38634	22.1404	1.48213
	199	23.1579	1.31443	22.1188	1.50478
	199.5	23.1051	1.43478	22.0869	1.5399
	200	22.9626	1.45693	22.0547	1.55654
	200.5	22.9968	1.45596	22.2106	1.58416
	201	22.9506	1.37145	22.1268	1.53192
	201.5	22.8674	1.3695	22.3869	1.47293
	202	22.9535	1.38541	21.9512	1.57278
	202.5	22.9093	1.35241	22.2024	1.49585
	203	23.0202	1.36854	22.2334	1.53116
	203.5	23.0748	1.36013	22.1758	1.57465
	204	23.1844	1.42847	22.1613	1.5924
	204.5	23.1912	1.42915	22.2627	1.5597
	205	23.2636	1.47998	22.1903	1.57796
	205.5	23.1815	1.51009	22.0785	1.54703
	206	23.1343	1.54725	21.9023	1.49846
	206.5	23.175	1.58398	22.202	1.44314
	207	23.113	1.6067	21.9786	1.41654
	207.5	23.0814	1.59278	21.9312	1.4003
	208	22.9671	1.5123	22.0621	1.4477
	208.5	22.8287	1.50173	22.3704	1.53703
	209	22.5645	1.53695	22.2912	1.53628
	209.5	22.7683	1.5008	22.396	1.45849
	210	22.8503	1.50806	22.2397	1.51713
	210.5	22.7438	1.55484	22.3873	1.45585
	211	22.8193	1.49592	22.0686	1.55378
	211.5	22.5432	1.60717	22.1011	1.53321
	212	22.6459	1.59289	22.403	1.42336
	212.5	22.7426	1.47304	22.3879	1.4251
	213	22.6479	1.56532	22.1845	1.52382
	213.5	22.6692	1.55229	22.0463	1.49988
	214	22.8462	1.53708	22.0626	1.55224
	214.5	22.934	1.48746	22.1349	1.62209
	215	22.8794	1.45091	22.1891	1.66427
	215.5	22.6061	1.371	22.2891	1.61103
	216	22.5437	1.32839	22.3029	1.60662
	216.5	22.591	1.29454	22.2606	1.59054
	217	22.4734	1.3337	22.0423	1.56388
	217.5	22.3878	1.45856	22.0645	1.50608
	218	22.4971	1.40277	22.2057	1.46014
	218.5	22.3737	1.36565	22.1692	1.47019
	219	22.4674	1.35656	22.2472	1.51499
	219.5	22.3881	1.3295	22.319	1.55139
	220	22.4454	1.28449	22.573	1.52169
	220.5	22.3987	1.36443	22.4965	1.47313
	221	22.429	1.38906	22.4021	1.52758
	221.5	22.5473	1.37021	22.3893	1.528
	222	22.5859	1.35296	22.1883	1.60346
	222.5	22.7098	1.38783	22.036	1.5879
	223	22.7212	1.34771	22.0704	1.57365
	223.5	22.6543	1.33944	22.1023	1.55137
	224	22.6377	1.34461	22.0474	1.50117
	224.5	22.5883	1.33155	22.3497	1.472
	225	22.5742	1.31216	22.1531	1.56512
	225.5	22.4899	1.32134	22.2105	1.5372
	226	22.5459	1.31907	22.0144	1.54302
	226.5	22.5529	1.3112	22.1832	1.4506
	227	22.4741	1.37335	22.0538	1.44458
	227.5	22.5163	1.4174	22.0359	1.56344
	228	22.6107	1.39265	22.0925	1.57954
	228.5	22.7273	1.42968	22.2012	1.61854
	229	22.7718	1.43386	22.2322	1.6349
	229.5	22.7788	1.43541	22.3133	1.5766
	230	22.891	1.42091	22.1401	1.52776
	230.5	22.8617	1.38353	22.1114	1.53689
	231	22.8331	1.3312	22.126	1.56283
	231.5	22.755	1.32242	22.1668	1.43409
	232	22.6701	1.30792	22.078	1.54665
	232.5	22.6566	1.33981	22.1426	1.47743
	233	22.7216	1.33764	22.022	1.54102
	233.5	22.8222	1.32566	22.3301	1.5392
	234	22.7683	1.33533	22.411	1.56998
	234.5	22.6688	1.35476	22.4321	1.50688
	235	22.6264	1.31735	22.4221	1.50217
	235.5	22.6221	1.35276	22.4776	1.51036
	236	22.5358	1.34428	22.3436	1.50276
	236.5	22.5426	1.35937	22.4238	1.52611
	237	22.6906	1.33004	22.365	1.55611
	237.5	22.5479	1.42762	22.3654	1.63181
	238	22.6066	1.3375	22.4813	1.56776
	238.5	22.6437	1.44288	22.6563	1.4648
	239	22.8274	1.41581	22.353	1.4883
	239.5	22.88	1.43948	22.4396	1.52866
	240	22.869	1.41198	22.6275	1.489
	240.5	22.9759	1.26151	22.3145	1.51355
	241	23.0264	1.31803	22.3378	1.43151
	241.5	22.841	1.35633	22.3192	1.4213
	242	22.7952	1.32357	22.1966	1.50432
	242.5	22.7867	1.3794	22.1422	1.47589
	243	22.6596	1.42573	22.1347	1.58037
	243.5	22.4589	1.42163	22.1542	1.66524
	244	22.5009	1.40277	22.2477	1.60759
	244.5	22.528	1.38391	22.2225	1.63904
	245	22.5875	1.34945	22.2776	1.58929
	245.5	22.4436	1.25431	22.207	1.51034
	246	22.269	1.41894	22.0331	1.44021
	246.5	22.2627	1.41872	22.1564	1.41631
	247	22.2302	1.41451	22.2299	1.40048
	247.5	22.2258	1.41444	22.2689	1.39359
	248	22.2387	1.41469	22.2689	1.39359
	248.5	22.2333	1.41457	22.2689	1.39359
	249	22.2127	1.41431	22.2689	1.39359
	249.5	22.1299	1.4163	22.2689	1.39359

## Sheet: Fig.S6f
	Time traces						Slope
		Control (unpaired)		5x spaced			Control (unpaired)	5x spaced
	Time (s)	Mean	SEM	Mean	SEM		0.074038	1.133
	0	-0.420013	0.367165	0.00173121	0.0833765		1.12975	1.27655
	0.5	-0.525413	0.416986	0.1164	0.147802		0.999735	1.0511
	1	-0.56682	0.450162	0.0750149	0.185857		1.02325	1.27215
	1.5	-0.623193	0.458812	0.139979	0.179653		0.857115	1.0803
	2	-0.512444	0.485574	-0.0794806	0.203242		1.02897	1.65435
	2.5	-0.391314	0.510094	-0.172316	0.117837		1.03194	1.2702
	3	-0.340735	0.516697	-0.255045	0.139071		0.75211
	3.5	-0.215556	0.530031	-0.177491	0.153717
	4	-0.0832273	0.567148	-0.354684	0.185034
	4.5	-0.436051	0.655877	-0.502094	0.0952193
	5	-0.366557	0.57703	-0.429211	0.106354
	5.5	-0.382881	0.553032	-0.382176	0.0875811
	6	-0.410601	0.5521	-0.51552	0.0954498
	6.5	-0.39582	0.482397	-0.362222	0.110443
	7	-0.132428	0.478216	-0.201842	0.0991877
	7.5	-0.144627	0.447758	-0.30155	0.157382
	8	-0.127689	0.45146	-0.234667	0.207891
	8.5	-0.0870199	0.355945	-0.129718	0.208873
	9	-0.144493	0.350773	-0.0716261	0.182898
	9.5	-0.226021	0.339581	0.0922231	0.146028
	10	-0.273998	0.405073	0.1019	0.162333
	10.5	-0.336668	0.400076	0.120378	0.185311
	11	-0.278088	0.502256	0.0581602	0.188246
	11.5	-0.387528	0.477001	0.0282529	0.132812
	12	-0.25263	0.480867	0.014647	0.196185
	12.5	-0.154417	0.486609	0.132085	0.191648
	13	-0.230377	0.404799	0.207101	0.151805
	13.5	-0.258744	0.402646	0.14909	0.149729
	14	-0.377465	0.335886	0.186015	0.14255
	14.5	-0.361103	0.235274	0.163326	0.153696
	15	-0.123085	0.133821	0.0361552	0.152438
	15.5	0.00201851	0.11639	-0.249394	0.105842
	16	0.0068386	0.151793	-0.335372	0.153205
	16.5	-0.0227777	0.243148	-0.314177	0.167624
	17	-0.05522	0.287179	-0.294877	0.181697
	17.5	-0.0371406	0.306712	-0.122973	0.0628621
	18	-0.122721	0.404769	-0.214286	0.143535
	18.5	0.00103239	0.390182	-0.225793	0.169628
	19	-0.0781921	0.384372	-0.200926	0.158271
	19.5	-0.0466512	0.324678	-0.268812	0.152931
	20	-0.129026	0.321103	-0.209926	0.167397
	20.5	-0.0596072	0.323994	-0.0509452	0.151765
	21	-0.0113521	0.349125	-0.0812103	0.163515
	21.5	0.0953106	0.378695	-0.0681625	0.111032
	22	0.208595	0.357479	0.00158386	0.0745611
	22.5	0.0938019	0.259839	0.0554969	0.11087
	23	0.065003	0.226227	0.152286	0.133281
	23.5	0.0667948	0.213624	0.183358	0.113176
	24	-0.0773711	0.188592	0.301285	0.155623
	24.5	-0.0566371	0.145535	0.293363	0.186574
	25	-0.096717	0.137774	0.187219	0.182216
	25.5	-0.0386216	0.187013	0.292877	0.117352
	26	0.10946	0.294916	0.147144	0.104019
	26.5	0.305316	0.330198	0.0942504	0.147578
	27	0.27301	0.328102	0.103603	0.114055
	27.5	0.334343	0.280825	0.31139	0.102312
	28	0.305303	0.359095	0.166236	0.0931927
	28.5	0.438205	0.415377	0.100513	0.0933505
	29	0.399863	0.435823	0.00458639	0.0684366
	29.5	0.336988	0.437209	-0.148605	0.0680523
	30	0.333871	0.438453	-0.126574	0.0913717
	30.5	0.100621	0.339993	-0.156116	0.153897
	31	0.12706	0.261753	-0.0157356	0.0879376
	31.5	-0.00924053	0.260277	0.00659533	0.136871
	32	0.0230481	0.374447	0.068528	0.143509
	32.5	0.203698	0.383843	0.0658518	0.16975
	33	0.290869	0.298225	0.101164	0.182959
	33.5	0.212315	0.324102	0.174037	0.175861
	34	0.38719	0.414266	0.0156639	0.21425
	34.5	0.263955	0.400646	-0.0731561	0.18533
	35	0.10411	0.42044	0.0420391	0.141681
	35.5	0.0788243	0.42949	-0.0887222	0.115164
	36	0.0448675	0.419553	0.0282072	0.181071
	36.5	0.0550277	0.412119	0.0614496	0.162257
	37	0.0215359	0.338476	0.081022	0.139588
	37.5	0.0823803	0.303779	0.00443835	0.121767
	38	0.0343468	0.349693	0.0358937	0.181957
	38.5	0.136373	0.35054	-0.211787	0.125064
	39	0.109563	0.32906	-0.0662863	0.127261
	39.5	0.133469	0.303867	-0.114085	0.219494
	40	0.252846	0.421475	0.00217357	0.181196
	40.5	0.175253	0.431842	-0.0159045	0.158666
	41	0.140841	0.290178	-0.0139846	0.206857
	41.5	0.0925719	0.27669	0.0888409	0.154183
	42	0.0738781	0.273791	0.121128	0.157029
	42.5	-0.118038	0.225326	0.070001	0.159304
	43	0.0281666	0.304861	-0.0487122	0.120197
	43.5	-0.0129623	0.317291	-0.00347907	0.0740335
	44	-0.116337	0.32435	0.0602091	0.0712833
	44.5	-0.00749036	0.329829	0.0512548	0.145345
	45	0.178286	0.282042	0.191633	0.118431
	45.5	0.129338	0.28154	0.201363	0.131232
	46	0.111444	0.267785	0.175323	0.0876182
	46.5	0.19477	0.313683	0.245631	0.200721
	47	0.0109343	0.404655	0.144584	0.117183
	47.5	-0.163815	0.341599	0.0592426	0.125821
	48	-0.0700804	0.396626	0.11002	0.0927261
	48.5	-0.0537934	0.400891	-0.0100271	0.139199
	49	-0.0417926	0.370756	-0.114767	0.15588
	49.5	0.0138685	0.315782	-0.312158	0.172249
	50	-0.0119212	0.335818	-0.270199	0.181994
	50.5	-0.0904594	0.253522	-0.264534	0.176631
	51	-0.157392	0.294147	0.0268736	0.186489
	51.5	-0.215654	0.300894	-0.00940587	0.111538
	52	-0.304813	0.325999	0.0850106	0.134577
	52.5	-0.22067	0.34966	0.507659	0.341962
	53	-0.203409	0.395003	0.568964	0.342359
	53.5	-0.296702	0.393633	0.4893	0.390421
	54	-0.419673	0.364644	0.0861257	0.350936
	54.5	-0.276966	0.30853	0.154988	0.396708
	55	-0.480502	0.386051	-0.0739439	0.347327
	55.5	-0.392852	0.362627	0.250771	0.371581
	56	-0.122688	0.524761	0.307582	0.401479
	56.5	0.231659	0.498596	-0.261093	0.401923
	57	0.00236202	0.471157	0.0159689	0.33679
	57.5	-0.03507	0.469011	0.666573	0.368037
	58	-0.31265	0.658125	0.259421	0.511298
	58.5	-0.363112	0.793903	-0.246405	0.786183
	59	-0.355655	0.799767	-0.310858	0.830639
	59.5	-0.211059	0.736068	-0.542346	0.868566
	60	0.914544	0.719404	0.23704	0.70153
	60.5	1.04151	0.681141	0.304255	0.6065
	61	1.07225	0.67777	0.559219	0.58828
	61.5	0.703613	0.522944	0.505566	0.61156
	62	0.566548	0.49645	0.608547	0.609113
	62.5	0.692184	0.4551	0.877266	0.565311
	63	0.986177	0.430055	1.02997	0.594684
	63.5	1.55649	0.497248	1.02682	0.669526
	64	2.01017	0.608476	1.37729	0.789043
	64.5	2.18096	0.647663	1.61734	0.834746
	65	2.4841	0.728445	1.79735	0.925147
	65.5	2.62474	0.663126	1.88695	0.888383
	66	2.5035	0.554967	2.17637	0.953339
	66.5	2.66744	0.624208	2.45809	0.967358
	67	2.53318	0.495048	2.56006	1.06178
	67.5	2.66927	0.551866	2.64465	1.06418
	68	2.69978	0.624236	2.78307	1.19691
	68.5	3.12388	0.678234	2.82157	1.26386
	69	3.15662	0.744067	3.00528	1.36616
	69.5	3.41427	0.825037	3.45318	1.54134
	70	3.72769	0.849621	3.6454	1.52833
	70.5	4.17088	0.937044	3.92726	1.64971
	71	4.38801	0.989154	4.38056	1.83454
	71.5	4.89888	1.12402	4.65274	1.82541
	72	5.13524	1.15751	5.04421	1.8259
	72.5	5.50711	1.35256	5.33348	1.90633
	73	5.67747	1.59159	5.60502	2.01638
	73.5	5.89028	1.60968	6.07046	2.12254
	74	6.18142	1.71721	6.43125	2.12086
	74.5	6.47372	1.796	6.99805	2.09074
	75	6.81991	1.92176	7.87721	2.24279
	75.5	7.2286	2.028	8.66302	2.31092
	76	7.42037	2.11224	9.20065	2.40899
	76.5	7.72034	2.26661	9.87294	2.38136
	77	8.15987	2.2899	10.788	2.28588
	77.5	8.36268	2.35066	11.1532	2.24215
	78	8.9365	2.45161	11.8671	2.16909
	78.5	9.39619	2.59052	12.6448	2.21925
	79	9.92891	2.58222	13.3883	2.19893
	79.5	10.2368	2.58474	13.9356	2.14001
	80	10.5758	2.70629	14.2405	2.15445
	80.5	10.9647	2.73433	15.0431	2.11049
	81	11.3009	2.87791	15.6905	2.12839
	81.5	11.3596	2.98577	16.0996	2.03372
	82	11.6306	3.05371	16.3386	1.9051
	82.5	11.7729	3.07533	17.0387	1.92082
	83	12.0674	3.09491	17.41	1.80119
	83.5	12.4604	3.0555	18.1091	1.66241
	84	12.8437	2.99334	18.4564	1.54429
	84.5	13.4082	2.86132	18.8113	1.50381
	85	13.4058	2.74771	19.4857	1.40359
	85.5	13.8706	2.65037	19.7781	1.33715
	86	14.34	2.6239	20.2778	1.21101
	86.5	14.4499	2.58644	20.363	1.07365
	87	14.7391	2.60238	20.6936	1.09628
	87.5	15.2505	2.60704	20.6508	0.995435
	88	15.5044	2.54999	21.1061	1.11061
	88.5	15.8204	2.54264	21.3899	1.07903
	89	16.0645	2.57094	21.5454	1.08769
	89.5	16.6479	2.64545	21.9167	0.941382
	90	16.6165	2.58055	22.0948	0.956724
	90.5	16.9238	2.57675	22.0714	0.944717
	91	17.1521	2.54213	22.3001	0.974256
	91.5	17.6183	2.58031	22.5427	1.06734
	92	17.6539	2.56512	22.7582	1.05621
	92.5	17.8358	2.58472	22.8173	1.02376
	93	17.7469	2.58626	22.8288	1.01571
	93.5	17.8143	2.58649	22.8882	1.00109
	94	18.0723	2.6562	23.0336	0.950957
	94.5	18.3852	2.64464	22.9268	0.868169
	95	18.4456	2.67303	22.9236	0.868387
	95.5	18.6117	2.68609	22.9406	0.844583
	96	18.7183	2.64182	23.1505	0.881262
	96.5	18.6784	2.63026	23.2331	0.832213
	97	18.6116	2.60958	23.4271	0.826682
	97.5	18.5778	2.59097	23.4902	0.912668
	98	18.6014	2.61026	23.6066	0.91366
	98.5	18.6582	2.61396	23.5645	0.896746
	99	18.5769	2.62497	23.4908	0.91431
	99.5	18.6545	2.69218	23.5258	0.915313
	100	18.9181	2.74955	23.6065	0.969576
	100.5	19.3019	2.92398	23.5551	0.971219
	101	19.37	2.95205	23.8011	0.956145
	101.5	19.2461	2.95481	23.9558	0.951086
	102	19.2963	2.96415	23.6991	0.976893
	102.5	19.0192	2.94524	23.885	0.949836
	103	18.9671	2.91719	23.8378	0.945241
	103.5	18.8353	2.87981	23.9645	0.937545
	104	18.8157	2.89403	24.0179	0.954364
	104.5	18.8317	2.93073	24.1426	0.927289
	105	18.9112	2.92655	24.0792	0.911253
	105.5	19.3475	2.99382	23.9858	0.935678
	106	19.3473	3.00376	24.0005	0.91256
	106.5	19.557	3.00787	23.8557	0.883999
	107	19.5486	2.9929	23.9245	0.890465
	107.5	19.5396	3.03376	23.9224	0.87563
	108	19.5154	3.04868	23.9053	0.89149
	108.5	19.6443	3.03429	23.8065	0.899087
	109	19.5625	2.95515	23.6987	0.954892
	109.5	19.6081	2.94747	23.596	0.915847
	110	19.68	2.95194	23.7062	0.905106
	110.5	19.7201	2.9775	23.8428	0.902141
	111	19.5371	2.95137	23.8801	0.902918
	111.5	19.4922	3.00701	23.9565	0.928159
	112	19.3503	2.99747	24.0798	0.821861
	112.5	19.445	2.98311	23.9348	0.769208
	113	19.5219	2.99575	23.8185	0.755556
	113.5	19.58	2.9532	23.8968	0.802787
	114	19.5122	2.9417	23.9281	0.746532
	114.5	19.5671	2.9329	23.8189	0.784925
	115	19.6383	2.97789	23.8336	0.769594
	115.5	19.6886	3.00326	23.7763	0.808584
	116	19.5977	2.94992	23.7739	0.774894
	116.5	19.6825	2.94774	23.7834	0.847635
	117	19.6089	2.92649	23.7119	0.962695
	117.5	19.6495	2.92596	23.7796	0.950103
	118	19.7566	2.93647	23.5867	0.896647
	118.5	19.7598	2.93582	23.5519	0.882123
	119	19.722	2.96544	23.6711	0.882376
	119.5	19.7434	2.91904	23.7596	0.890292
	120	19.6083	2.90854	23.6256	0.890443
	120.5	19.3721	2.91665	23.9166	0.734691
	121	19.4361	2.92365	23.7504	0.943099
	121.5	19.3221	2.88577	23.7151	0.912943
	122	19.2351	2.89717	23.5111	0.806026
	122.5	19.4932	2.9311	23.5774	0.840672
	123	19.5664	2.94621	23.6957	0.846661
	123.5	19.4283	2.91561	23.7635	0.811605
	124	19.5146	2.97273	23.7567	0.812248
	124.5	19.7268	2.98053	23.7448	0.839531
	125	19.6821	2.97069	23.8006	0.832248
	125.5	19.5285	2.888	23.6458	0.814529
	126	19.7525	3.01701	23.6771	0.788307
	126.5	20.2455	3.22223	23.7577	0.734559
	127	20.177	3.214	23.8807	0.656422
	127.5	20.0701	3.14511	23.8102	0.624637
	128	20.1002	3.14341	23.7944	0.698347
	128.5	20.016	3.07529	23.7627	0.730779
	129	19.8668	3.04207	23.9498	0.760305
	129.5	20.0003	3.0251	23.8434	0.795468
	130	20.2138	3.08121	23.99	0.88531
	130.5	20.0943	3.07649	24.0814	0.861724
	131	20.033	3.14275	24.0296	1.02877
	131.5	20.1046	3.14655	24.2951	1.07449
	132	20.1926	3.14553	24.4353	1.09458
	132.5	20.0214	3.09203	24.368	0.972225
	133	20.133	3.15858	24.3331	1.07379
	133.5	20.2903	3.11299	24.2691	1.01873
	134	20.084	3.11243	24.1435	0.968885
	134.5	20.0479	3.14704	24.017	0.90912
	135	20.1126	3.14368	24.0452	0.887937
	135.5	20.2076	3.19636	24.0168	0.882332
	136	20.1117	3.21922	24.0062	0.923967
	136.5	20.1914	3.21074	23.9297	0.862897
	137	20.0685	3.17315	23.9578	0.969492
	137.5	20.1006	3.18048	23.8457	0.978583
	138	19.9739	3.13504	24.1655	0.952478
	138.5	20.2139	3.17407	24.1455	1.00237
	139	20.3607	3.13235	24.115	0.954302
	139.5	20.2541	3.13935	24.1401	0.909263
	140	19.7963	2.83191	24.2419	0.854485
	140.5	19.763	2.92046	24.2104	0.795687
	141	19.773	2.80434	24.2942	0.835744
	141.5	19.6528	2.79327	24.3395	0.858039
	142	19.7602	2.78854	24.3537	0.83199
	142.5	19.8258	2.80845	24.2832	0.808443
	143	19.7458	2.79422	24.0379	0.881711
	143.5	19.6806	2.85257	23.9404	0.855876
	144	19.8385	2.89378	23.8722	0.897146
	144.5	19.6843	2.94771	23.6724	0.955919
	145	19.6804	2.99925	23.7547	1.04663
	145.5	20.0153	3.14664	23.9954	1.05208
	146	20.228	3.18756	24.0878	1.0474
	146.5	20.4587	3.30113	24.2199	1.07607
	147	20.5951	3.23055	24.142	0.999605
	147.5	20.6221	3.24524	24.426	0.962564
	148	20.4902	3.20107	24.2626	0.908754
	148.5	20.5739	3.2542	24.1455	0.938759
	149	20.7673	3.29488	24.3493	0.87173
	149.5	20.9139	3.26768	24.2895	0.930966
	150	20.9073	3.26243	24.0556	0.977717
	150.5	21.0209	3.29242	24.2813	0.978405
	151	21.0166	3.31786	24.3147	1.00399
	151.5	21.1024	3.30953	24.2547	0.987094
	152	21.0968	3.31111	24.3398	1.01435
	152.5	21.1002	3.31546	24.1748	1.03903
	153	21.1562	3.36132	24.1731	1.00418
	153.5	21.0889	3.42016	24.1074	1.00456
	154	21.1053	3.44927	24.0498	1.04351
	154.5	21.2205	3.52774	24.0147	0.990254
	155	21.1281	3.54447	24.1147	1.01954
	155.5	21.1653	3.49786	24.1361	1.03186
	156	21.256	3.41512	24.2218	0.979457
	156.5	21.2745	3.37089	24.2376	0.957077
	157	21.2012	3.34291	24.2493	0.969709
	157.5	21.2369	3.23225	24.1721	0.963569
	158	21.0479	3.18769	24.1557	0.920419
	158.5	21.1066	3.1973	24.421	0.90636
	159	20.9936	3.23808	24.4436	0.922773
	159.5	20.8439	3.08656	24.4881	0.933053
	160	20.8933	3.08483	24.2259	0.900462
	160.5	20.8698	3.08157	24.1787	0.872767
	161	20.8446	3.09953	23.9127	0.801356
	161.5	20.9519	3.12389	23.8895	0.824468
	162	20.9729	3.15698	23.9147	0.879164
	162.5	20.8593	3.12344	23.8857	0.830274
	163	20.938	3.14421	23.9542	0.854305
	163.5	20.9073	3.11298	23.9383	0.875784
	164	20.7955	3.0843	24.0338	0.988118
	164.5	20.8448	3.07794	23.9132	1.00239
	165	20.8873	3.01805	23.9267	0.968682
	165.5	20.7955	3.01246	23.9653	0.952345
	166	20.9416	3.06965	23.9676	0.954307
	166.5	20.9759	3.15062	23.8922	1.00372
	167	20.9482	3.11569	23.9921	1.02313
	167.5	20.821	3.13801	24.083	1.07503
	168	20.849	3.13378	24.1273	1.06904
	168.5	21.1602	3.167	24.1426	1.03016
	169	21.0748	3.12684	24.2392	1.13729
	169.5	21.2333	3.2358	24.0807	1.02892
	170	21.3486	3.30726	24.208	0.933638
	170.5	21.3917	3.322	24.1409	1.06577
	171	21.5663	3.38765	24.0901	0.944955
	171.5	21.4825	3.39382	23.8917	0.973101
	172	21.6645	3.42111	23.8758	1.00185
	172.5	21.6646	3.41067	23.9234	1.02069
	173	21.4811	3.31651	24.1878	1.00515
	173.5	21.583	3.29787	24.2908	1.05726
	174	21.4926	3.38573	24.2772	1.02066
	174.5	21.4539	3.36707	24.2758	1.02796
	175	21.6003	3.39659	24.2057	1.0246
	175.5	21.6056	3.40078	24.3814	0.956574
	176	21.6625	3.41358	24.4342	1.01565
	176.5	21.7934	3.43712	24.2138	1.03007
	177	21.7115	3.41794	24.2472	0.96982
	177.5	21.6642	3.37204	24.3562	0.941709
	178	21.7928	3.44799	24.254	0.913844
	178.5	21.7253	3.4586	24.1964	0.896771
	179	21.7218	3.39361	24.2905	0.840748
	179.5	21.7582	3.39942	24.4288	0.920591
	180	21.9028	3.52641	24.4236	0.910774
	180.5	21.8484	3.47868	24.3263	0.981218
	181	21.7707	3.38159	24.1832	0.953954
	181.5	21.6594	3.43064	24.3634	0.970244
	182	21.5797	3.41241	24.4206	1.03811
	182.5	21.5658	3.36901	24.1603	1.03711
	183	21.2932	3.21845	24.2025	1.03913
	183.5	21.4414	3.18379	24.2584	1.10312
	184	21.2559	3.10378	24.2055	1.11733
	184.5	21.3435	3.07514	24.1656	1.06897
	185	21.2517	3.05815	24.1904	1.08092
	185.5	21.3554	3.06798	24.359	1.02748
	186	21.2776	3.16557	24.281	1.05971
	186.5	21.6185	3.32279	24.2099	1.06022
	187	21.8432	3.45055	24.2574	0.968787
	187.5	21.9706	3.49745	24.383	0.966785
	188	22.0167	3.51742	24.4662	0.964879
	188.5	21.9082	3.5214	24.4314	0.961803
	189	21.8419	3.49337	24.1965	0.985693
	189.5	21.7639	3.44967	24.3142	1.05702
	190	21.6205	3.41907	24.2194	1.11959
	190.5	21.7941	3.51355	24.3112	1.11038
	191	21.9259	3.53124	24.4057	1.1068
	191.5	21.6528	3.45779	24.5126	1.10015
	192	21.8009	3.51922	24.4659	1.1546
	192.5	21.691	3.45624	24.503	1.09712
	193	21.8063	3.43747	24.5266	1.08733
	193.5	21.758	3.43425	24.5757	1.0657
	194	21.7882	3.40637	24.5225	1.08928
	194.5	21.7137	3.33469	24.3249	1.10242
	195	21.8013	3.25823	24.2599	1.09011
	195.5	21.7877	3.26006	24.3065	1.10649
	196	21.8264	3.22829	24.2912	0.990596
	196.5	21.9551	3.21606	24.4313	0.976712
	197	21.7663	3.25109	24.4923	0.97309
	197.5	21.822	3.26939	24.4204	1.01633
	198	21.9447	3.30756	24.5585	0.994539
	198.5	21.8055	3.26745	24.5094	1.01594
	199	21.5326	3.25778	24.4858	0.977425
	199.5	21.5523	3.23285	24.5778	0.947018
	200	21.8791	3.23043	24.5008	0.895684
	200.5	21.8875	3.29085	24.4276	0.931544
	201	21.8185	3.25595	24.2869	0.972157
	201.5	21.755	3.28139	24.2546	1.04196
	202	21.8068	3.26484	24.3233	1.06806
	202.5	21.7128	3.27697	24.4859	1.10485
	203	21.7894	3.32894	24.578	1.02716
	203.5	21.7647	3.31414	24.4174	1.10187
	204	21.9668	3.3559	24.476	1.06588
	204.5	22.0421	3.43588	24.4406	0.999302
	205	22.012	3.48517	24.3594	1.09183
	205.5	21.9219	3.42032	24.308	1.12389
	206	21.8655	3.45074	24.2669	1.12186
	206.5	21.6242	3.38477	24.4167	1.12315
	207	21.4636	3.29176	24.2853	1.18099
	207.5	21.3925	3.29466	24.4461	1.1912
	208	21.5432	3.3911	24.4386	1.069
	208.5	21.5945	3.3404	24.5002	1.04869
	209	21.6477	3.35695	24.4605	1.06539
	209.5	21.637	3.41984	24.4601	1.13193
	210	22.0145	3.43485	24.6226	1.08353
	210.5	22.1685	3.49193	24.5993	1.07716
	211	22.1869	3.52198	24.4664	1.13569
	211.5	22.2598	3.59779	24.6715	1.08395
	212	22.4268	3.6804	24.6126	1.06859
	212.5	22.1529	3.56838	24.4591	1.12649
	213	22.128	3.57701	24.574	1.08127
	213.5	22.0099	3.59426	24.7294	1.06996
	214	21.9692	3.46023	24.5782	1.05032
	214.5	21.9512	3.45906	24.4624	1.14192
	215	22.1097	3.54706	24.6536	1.02729
	215.5	22.0111	3.62536	24.3213	1.12521
	216	21.9533	3.61892	24.4454	1.17692
	216.5	22.0417	3.61628	24.5922	1.10966
	217	22.1047	3.58914	24.5254	1.07546
	217.5	22.1204	3.57742	24.4948	1.12256
	218	22.3281	3.63168	24.5466	1.02829
	218.5	22.5816	3.70479	24.4994	0.980584
	219	22.5943	3.69217	24.4871	1.06609
	219.5	22.3826	3.74807	24.4644	1.04806
	220	22.5171	3.70136	24.4783	1.02061
	220.5	22.3395	3.68585	24.649	1.05537
	221	22.2294	3.62831	24.5395	1.02699
	221.5	22.2052	3.55812	24.4014	1.05113
	222	22.2062	3.4833	24.2713	1.13799
	222.5	21.9706	3.34708	24.3535	1.15438
	223	21.9846	3.28606	24.2809	1.19853
	223.5	21.9035	3.30431	24.2425	1.20819
	224	21.9524	3.32894	24.4796	1.21651
	224.5	21.8385	3.34942	24.6206	1.10978
	225	21.7873	3.37912	24.4823	1.09554
	225.5	21.9959	3.52907	24.4004	1.15558
	226	22.0351	3.53572	24.4557	1.15623
	226.5	22.0483	3.53956	24.6926	1.07597
	227	22.0465	3.57922	24.439	1.14829
	227.5	21.9789	3.60143	24.5129	1.16903
	228	21.987	3.61355	24.2112	1.17306
	228.5	21.8757	3.64848	24.4916	1.17662
	229	21.9785	3.67388	24.4318	1.16662
	229.5	22.113	3.71129	24.6793	1.15311
	230	22.0316	3.72981	24.5458	1.16774
	230.5	22.0185	3.775	24.6047	1.11509
	231	22.0613	3.69985	24.5123	1.15155
	231.5	22.1034	3.6434	24.4475	1.13615
	232	21.8583	3.65247	24.3715	1.11923
	232.5	22.1115	3.61936	24.4083	1.1552
	233	22.1924	3.61099	24.5826	1.11631
	233.5	22.4417	3.80171	24.8336	1.11298
	234	22.5241	3.846	24.7205	1.12817
	234.5	22.3223	3.73257	24.6576	1.14769
	235	22.4022	3.8362	24.686	1.06347
	235.5	22.226	3.65356	24.3692	1.07763
	236	22.0174	3.68968	24.2355	1.09243
	236.5	21.942	3.61459	24.4981	1.16242
	237	21.9737	3.64701	24.7418	1.07182
	237.5	22.0542	3.59095	24.4281	1.05749
	238	22.2969	3.63296	24.3542	1.27057
	238.5	22.3813	3.72833	24.5065	1.14566
	239	22.4509	3.80314	24.4298	1.1482
	239.5	22.511	3.75205	24.2039	1.28465
	240	22.3645	3.78483	24.5212	1.17718
	240.5	22.2216	3.77494	24.5091	1.16
	241	22.3621	3.79221	24.4514	1.09167
	241.5	22.2545	3.77308	24.716	1.05516
	242	22.2982	3.72812	24.5684	1.10791
	242.5	22.2501	3.6983	24.4792	1.17151
	243	21.9297	3.69777	24.4198	1.21204
	243.5	21.7983	3.57611	24.465	1.23381
	244	21.7746	3.49372	24.5107	1.2855
	244.5	21.9337	3.45712	24.5094	1.18152
	245	22.0596	3.48795	24.3885	1.19336
	245.5	22.2627	3.55342	24.1956	1.06099
	246	22.2624	3.56292	24.141	1.04969
	246.5	22.158	3.5777	24.0279	1.02152
	247	22.1637	3.60491	24.0812	1.03519
	247.5	22.1203	3.5645	24.0952	1.04095
	248	22.1257	3.56582	24.097	1.04409
	248.5	22.2128	3.58802	24.1533	1.05608
	249	22.0719	3.48308	24.1183	1.04607
	249.5	21.9805	3.41635	24.0954	1.0401
