# Supplementary material for: PKCδ is an activator of neuronal mitochondrial metabolism that mediates the spacing effect on memory consolidation
Source: eLife. 2024 Oct 30;13:RP92085. doi: 10.7554/eLife.92085 (PMC11524582; doi:10.7554/eLife.92085)
Supplement: Figure 6—source data 1. [file elife-92085-fig6-data1.xlsx]

## Sheet: Fig.6a
	Time traces						Slope
		Control (unpaired)		1x			Control (unpaired)	1x
	Time (s)	Mean	SEM	Mean	SEM		0.944035	1.1121
	0	0.934363	0.479393	0.243056	0.501985		1.2128	1.2147
	0.5	1.44379	0.485935	0.743109	0.538947		1.1045	1.7003
	1	1.7863	0.49886	1.00339	0.554999		0.993595	1.80032
	1.5	1.80622	0.556396	1.01794	0.546994		0.82331	1.0797
	2	1.76428	0.542185	0.939573	0.568013		0.95781	1.00528
	2.5	1.66337	0.528528	0.754714	0.553501		0.673735	1.15175
	3	1.51478	0.553788	0.840022	0.52278		1.1367	0.78897
	3.5	1.34946	0.576872	1.01186	0.485144		0.5922	1.39635
	4	1.3544	0.496535	1.13599	0.523319		1.00577	0.871485
	4.5	1.32549	0.485289	1.04042	0.502799		0.541015	1.07858
	5	1.12087	0.467011	1.04771	0.496215		0.21823	1.04655
	5.5	1.28567	0.385646	0.908663	0.401577		0.6582	1.40865
	6	1.0297	0.430237	0.740355	0.36179		0.85141	1.01015
	6.5	1.12325	0.402998	1.01767	0.45011		0.90264	1.37765
	7	1.02563	0.358311	0.921821	0.425039		0.939315	1.2225
	7.5	0.745939	0.302032	0.740809	0.445746		0.81998	1.36475
	8	0.657382	0.253269	0.573418	0.422621		1.41216
	8.5	0.710374	0.250749	0.848319	0.437692		0.392235
	9	0.647786	0.266098	0.817767	0.368874		0.44442
	9.5	0.595073	0.305135	0.965832	0.360958
	10	0.716073	0.272724	0.889191	0.392848
	10.5	0.62648	0.252465	1.15949	0.348148
	11	0.598593	0.231749	0.897423	0.376382
	11.5	0.484009	0.245534	0.513702	0.38612
	12	0.403372	0.238916	0.611677	0.358277
	12.5	0.457895	0.287435	0.742952	0.275824
	13	0.300504	0.280475	0.507449	0.330337
	13.5	0.221491	0.344257	0.507548	0.340858
	14	0.28056	0.364343	0.381091	0.266662
	14.5	-0.0385475	0.318645	0.325331	0.257329
	15	-0.0106006	0.316166	0.106413	0.205298
	15.5	0.00887059	0.322387	0.201779	0.156422
	16	0.0863556	0.277889	0.270741	0.186766
	16.5	0.207536	0.261322	0.421378	0.191379
	17	0.459973	0.276283	0.374487	0.158186
	17.5	0.524002	0.235924	0.426973	0.241606
	18	0.450585	0.227983	0.441227	0.228117
	18.5	0.462006	0.208565	0.394547	0.257162
	19	0.270684	0.197322	0.382206	0.225256
	19.5	0.347277	0.227998	0.202271	0.230196
	20	0.326089	0.249139	0.291325	0.175218
	20.5	0.552805	0.231197	0.206877	0.14617
	21	0.330364	0.26992	-0.0569226	0.172008
	21.5	0.240598	0.290061	-0.0291186	0.146695
	22	0.218537	0.215204	-0.0295103	0.154276
	22.5	0.237829	0.17	0.0890453	0.199225
	23	0.270644	0.167588	0.0894447	0.176004
	23.5	0.292103	0.153091	0.228141	0.164556
	24	0.251788	0.178636	0.204401	0.150489
	24.5	0.383992	0.212743	0.170814	0.164569
	25	0.267958	0.156199	0.200753	0.182896
	25.5	0.0947877	0.202992	0.197956	0.215888
	26	0.085291	0.227254	0.269826	0.211618
	26.5	0.0604607	0.231139	0.34095	0.23696
	27	-0.0470429	0.220711	0.262073	0.23756
	27.5	0.0795019	0.20724	0.197952	0.218231
	28	0.278827	0.215799	0.133227	0.210155
	28.5	0.102259	0.207855	0.116008	0.21488
	29	0.193725	0.197398	0.170409	0.190987
	29.5	0.106241	0.197097	0.361666	0.152571
	30	-0.0725764	0.228946	0.302595	0.158443
	30.5	-0.171675	0.268332	0.161586	0.13752
	31	-0.169865	0.21893	0.0921451	0.151205
	31.5	-0.141824	0.236058	-0.021897	0.171807
	32	-0.0770509	0.285391	-0.133083	0.164917
	32.5	0.0720382	0.252831	0.193963	0.16861
	33	0.1648	0.240637	-0.0166862	0.161712
	33.5	-0.0306825	0.237881	0.194982	0.152882
	34	0.0182873	0.233582	0.0148802	0.158165
	34.5	0.0932127	0.232192	0.103497	0.200349
	35	-8.1464e-05	0.247959	0.079689	0.212963
	35.5	-0.209034	0.261349	0.0101338	0.22318
	36	-0.231499	0.272677	0.161355	0.217438
	36.5	-0.363701	0.276286	0.0279759	0.209942
	37	-0.412043	0.313061	-0.0440539	0.201115
	37.5	-0.631415	0.297958	0.0817804	0.299164
	38	-0.320868	0.179583	0.166049	0.317747
	38.5	-0.496183	0.185461	0.146357	0.351075
	39	-0.577437	0.21055	-0.0190336	0.339417
	39.5	-0.439439	0.212174	-0.00821916	0.319617
	40	-0.446841	0.155038	-0.0175586	0.331489
	40.5	-0.486863	0.185492	-0.132661	0.310768
	41	-0.34332	0.204121	-0.105723	0.355934
	41.5	-0.266807	0.231956	0.0664365	0.334346
	42	-0.38006	0.252031	-0.012856	0.270543
	42.5	-0.659174	0.200606	0.0948927	0.22494
	43	-0.640294	0.221536	-0.178832	0.226586
	43.5	-0.793097	0.233923	-0.0883029	0.204124
	44	-0.68107	0.298532	-0.121682	0.229988
	44.5	-0.681293	0.192558	-0.230948	0.249444
	45	-0.648549	0.190989	-0.451321	0.283299
	45.5	-0.684767	0.209499	-0.416843	0.286536
	46	-0.519399	0.332557	-0.559603	0.23761
	46.5	-0.449057	0.343963	-0.541375	0.230072
	47	-0.499439	0.330519	-0.618772	0.223882
	47.5	-0.361462	0.380712	-0.504222	0.231392
	48	-0.518851	0.413746	-0.443018	0.209602
	48.5	-0.257543	0.364529	-0.324129	0.229665
	49	-0.301876	0.33792	-0.525345	0.279432
	49.5	-0.373434	0.357456	-0.256222	0.281574
	50	-0.52748	0.313942	-0.399489	0.279317
	50.5	-0.446922	0.290255	-0.369572	0.270452
	51	-0.537398	0.297889	-0.291425	0.283334
	51.5	-0.766519	0.311545	-0.29241	0.303894
	52	-0.76353	0.335328	-0.687509	0.287667
	52.5	-0.650652	0.410068	-0.92723	0.278693
	53	-0.562199	0.414609	-0.990196	0.273224
	53.5	-0.612129	0.387616	-0.839794	0.254804
	54	-0.535076	0.399091	-0.642513	0.247723
	54.5	-0.697782	0.38968	-0.865348	0.265749
	55	-0.766084	0.369426	-0.953503	0.291921
	55.5	-1.03894	0.367064	-1.15736	0.330139
	56	-1.12884	0.357075	-1.42985	0.263232
	56.5	-1.12833	0.309201	-1.47269	0.259997
	57	-1.20411	0.36211	-1.41698	0.24894
	57.5	-1.06748	0.359081	-1.48183	0.290906
	58	-1.08168	0.501556	-1.37408	0.196595
	58.5	-1.29715	0.531963	-1.49423	0.272502
	59	-0.942784	0.514655	-1.42951	0.266857
	59.5	-0.791662	0.546369	-1.42996	0.377159
	60	-0.83751	0.56792	-1.22828	0.413707
	60.5	-0.797296	0.589924	-0.997665	0.490603
	61	-0.53402	0.584925	-0.578556	0.481965
	61.5	-0.149655	0.661188	-0.284582	0.448843
	62	-0.232651	0.654121	0.337758	0.405048
	62.5	-0.00408399	0.627454	0.580736	0.348461
	63	-0.193291	0.56558	1.00747	0.353768
	63.5	-0.215083	0.535352	1.41589	0.399176
	64	-0.281368	0.527578	2.0187	0.424526
	64.5	-0.0152699	0.533864	2.56702	0.453319
	65	0.154804	0.593412	2.9582	0.433452
	65.5	0.538099	0.596411	3.57091	0.515588
	66	0.853864	0.652249	4.10787	0.55131
	66.5	1.12829	0.649653	4.5098	0.531514
	67	1.01974	0.704351	4.89176	0.540038
	67.5	1.48987	0.683315	5.33671	0.558488
	68	1.88981	0.772729	5.96005	0.640104
	68.5	2.05636	0.814607	6.47409	0.653884
	69	2.50604	0.932894	6.99587	0.623169
	69.5	2.90551	0.986309	7.35671	0.608196
	70	3.41543	0.996094	7.93801	0.603374
	70.5	3.65417	1.00557	8.4598	0.565346
	71	3.87344	1.031	9.05094	0.594159
	71.5	4.21065	1.03365	9.78919	0.582105
	72	4.52678	1.06397	10.008	0.550604
	72.5	5.09363	1.05101	10.5063	0.549584
	73	5.32298	1.08082	10.7643	0.557006
	73.5	5.9275	1.11778	11.2763	0.546485
	74	6.12556	1.12069	11.6286	0.556003
	74.5	6.5072	1.1067	11.8984	0.54978
	75	6.78996	1.08284	12.0629	0.481036
	75.5	6.87857	1.09808	12.3961	0.479791
	76	7.09036	1.09755	12.3404	0.480567
	76.5	7.62039	1.15715	12.6231	0.442546
	77	8.03692	1.18093	13.0098	0.453073
	77.5	8.56411	1.16165	13.382	0.430836
	78	8.88424	1.15575	13.4386	0.447942
	78.5	9.10977	1.15925	13.5592	0.44457
	79	9.34362	1.08607	13.5941	0.430952
	79.5	9.51355	1.1008	13.5872	0.456216
	80	9.89467	1.1304	13.7172	0.454374
	80.5	10.2381	1.16397	14.04	0.486314
	81	10.4955	1.17794	14.1785	0.500961
	81.5	10.7773	1.15914	14.2298	0.58565
	82	11.3008	1.15541	14.4051	0.61231
	82.5	11.4758	1.11386	14.278	0.656479
	83	11.5017	1.11524	14.3262	0.604174
	83.5	11.6977	1.11572	14.4289	0.579305
	84	11.6417	1.13969	14.6742	0.52069
	84.5	11.3979	1.12747	14.8899	0.573478
	85	11.697	1.13876	14.9397	0.623968
	85.5	11.9726	1.09438	14.8537	0.620218
	86	11.9983	1.05166	14.9903	0.639139
	86.5	12.1831	1.00433	14.9454	0.693038
	87	12.2846	0.974261	15.0765	0.634355
	87.5	12.3655	0.945167	15.0909	0.618404
	88	12.5816	0.952108	15.2928	0.614852
	88.5	12.6552	0.993378	15.2896	0.690593
	89	12.4487	1.00082	15.1801	0.693206
	89.5	12.5615	1.05904	15.2068	0.623415
	90	12.6008	1.10544	15.299	0.692088
	90.5	12.7435	1.12048	15.0724	0.66927
	91	12.7945	1.08205	14.9188	0.647732
	91.5	12.8205	1.10899	14.9426	0.581628
	92	12.7951	1.07374	14.9765	0.638442
	92.5	12.8673	1.07636	14.8891	0.618288
	93	12.8643	1.04629	14.9721	0.664813
	93.5	12.7368	1.09352	15.2167	0.695036
	94	12.9781	1.06166	15.2236	0.670537
	94.5	13.0693	1.02814	15.0917	0.654635
	95	12.9978	0.988969	15.3023	0.746224
	95.5	13.2098	0.956153	15.4047	0.660302
	96	13.4734	0.922659	15.1551	0.607751
	96.5	13.5478	0.921665	15.2179	0.639811
	97	13.4925	0.964851	15.3521	0.652733
	97.5	13.2271	1.02183	15.3199	0.643958
	98	13.155	1.06337	15.3727	0.732512
	98.5	13.0573	1.0046	15.3108	0.772161
	99	12.9314	1.00862	15.4023	0.75698
	99.5	13.0953	0.950796	15.6379	0.75912
	100	13.5413	1.01365	15.3691	0.814763
	100.5	13.8744	1.00308	15.3428	0.792256
	101	13.9375	1.03678	15.2483	0.789823
	101.5	14.041	1.0683	15.1609	0.801145
	102	13.9291	1.10165	15.4098	0.756319
	102.5	13.9302	1.07006	15.1599	0.706581
	103	13.7049	1.07178	15.1903	0.704485
	103.5	13.7255	1.01911	15.2405	0.66221
	104	13.7356	0.945126	15.3727	0.714721
	104.5	13.7568	0.914712	15.4122	0.681381
	105	13.6984	0.906386	15.3227	0.750341
	105.5	13.6561	0.93452	15.5263	0.818776
	106	13.7462	0.953342	15.5629	0.79637
	106.5	13.6997	0.99376	15.7636	0.782932
	107	13.6769	0.989002	15.668	0.79821
	107.5	13.7159	0.967195	15.8535	0.794803
	108	13.9881	0.990163	15.7733	0.718952
	108.5	13.7857	0.966272	15.5813	0.761596
	109	13.6951	0.943404	15.2927	0.801308
	109.5	13.9042	0.963653	15.4484	0.857195
	110	13.7509	0.977334	15.581	0.779605
	110.5	13.6829	0.964441	15.412	0.806064
	111	14.2131	0.96874	15.5817	0.785634
	111.5	14.0454	0.99578	15.7573	0.773232
	112	14.1779	0.990746	15.6836	0.764158
	112.5	14.1894	0.995903	15.4105	0.819159
	113	14.0038	0.981406	15.5354	0.84759
	113.5	13.9923	0.9019	15.4685	0.81294
	114	14.0955	0.848907	15.5893	0.800491
	114.5	14.061	0.860195	15.7439	0.792988
	115	14.1062	0.87051	15.6089	0.768445
	115.5	14.2935	0.863891	15.7896	0.785571
	116	13.8448	0.811781	15.9967	0.770825
	116.5	14.0468	0.818533	15.9946	0.834889
	117	14.0852	0.778211	15.972	0.80902
	117.5	13.9524	0.785463	15.9197	0.823156
	118	13.8945	0.815309	15.7725	0.820139
	118.5	13.9177	0.801363	15.9241	0.828007
	119	14.1793	0.799114	16.209	0.761506
	119.5	14.3318	0.778669	16.3067	0.749835
	120	14.3879	0.774883	16.5943	0.75533
	120.5	14.3891	0.821596	16.8396	0.754119
	121	14.3148	0.809901	16.5315	0.771511
	121.5	14.3955	0.764605	16.3713	0.759567
	122	14.4555	0.816222	16.1846	0.788221
	122.5	14.5689	0.782223	16.0852	0.820329
	123	14.4652	0.808498	16.179	0.750091
	123.5	14.5684	0.750398	16.1541	0.710598
	124	14.6637	0.799069	16.1697	0.72619
	124.5	14.2668	0.752205	16.2406	0.730215
	125	13.9778	0.789633	16.2593	0.710108
	125.5	13.8447	0.786909	16.0867	0.728904
	126	13.7747	0.779157	16.0232	0.72052
	126.5	13.9423	0.765017	16.0865	0.689183
	127	14.0174	0.826906	16.141	0.704885
	127.5	14.1132	0.818886	16.1768	0.707425
	128	14.3878	0.77925	16.1984	0.746189
	128.5	14.4724	0.749684	16.2913	0.765156
	129	14.4258	0.766377	16.3386	0.778877
	129.5	14.3782	0.77085	16.3241	0.802683
	130	14.1423	0.806126	16.4092	0.853697
	130.5	14.1507	0.845815	16.5106	0.826426
	131	14.1513	0.860366	16.4748	0.784023
	131.5	14.2722	0.824782	16.419	0.747849
	132	14.3397	0.892495	16.5053	0.686565
	132.5	14.3603	0.882949	16.6251	0.669814
	133	14.2292	0.825622	16.4305	0.703526
	133.5	14.539	0.834814	16.2156	0.729534
	134	14.4165	0.836909	16.0702	0.787991
	134.5	14.2237	0.829905	16.209	0.78768
	135	14.1714	0.89046	16.1586	0.814136
	135.5	14.3489	0.905153	16.0577	0.750531
	136	14.3625	0.943566	15.9744	0.789138
	136.5	14.4657	0.932385	15.9386	0.720599
	137	14.4241	0.941622	15.9663	0.795747
	137.5	14.2551	0.854694	15.6033	0.80317
	138	14.5809	0.921145	15.4888	0.867328
	138.5	14.4059	0.893636	15.7457	0.840254
	139	14.2704	0.908874	15.9341	0.806546
	139.5	14.2576	0.960281	15.8349	0.809827
	140	14.6602	1.01514	16.0793	0.827331
	140.5	14.6161	0.992733	16.15	0.793266
	141	14.8456	0.981397	16.1652	0.792257
	141.5	14.7174	0.973761	16.2237	0.770613
	142	14.7853	0.877854	16.4376	0.753253
	142.5	14.7135	0.862827	16.4125	0.838055
	143	14.424	0.885392	16.3876	0.821329
	143.5	14.5841	0.918811	16.4153	0.795982
	144	14.8184	0.968824	16.2908	0.813343
	144.5	15.0289	0.958187	16.3207	0.892157
	145	15.251	0.950717	16.1552	0.901073
	145.5	14.7797	0.926028	16.149	0.882434
	146	14.7076	0.875259	16.2917	0.792212
	146.5	14.8561	0.912746	16.5892	0.836768
	147	14.9939	0.910142	16.4291	0.852238
	147.5	14.861	0.887216	16.3381	0.819435
	148	15.1897	0.952941	16.2596	0.862913
	148.5	15.1755	0.848884	16.2331	0.837125
	149	15.1578	0.779325	15.9467	0.791216
	149.5	15.4574	0.83006	16.2573	0.768873
	150	15.199	0.818684	16.3333	0.715767
	150.5	15.1	0.849047	16.522	0.705403
	151	14.9236	0.840425	16.418	0.74615
	151.5	15.0854	0.845729	16.3424	0.709698
	152	14.9272	0.861879	16.2197	0.769879
	152.5	14.6742	0.844247	16.2579	0.742257
	153	14.8297	0.82157	16.5348	0.744194
	153.5	14.9944	0.924612	16.5626	0.72894
	154	15.3059	0.914186	16.4847	0.767173
	154.5	15.2794	0.887421	16.4203	0.770246
	155	15.0648	0.797213	16.3293	0.734475
	155.5	14.7018	0.899403	16.303	0.779998
	156	14.644	0.871508	16.0347	0.81985
	156.5	14.4314	0.867753	15.9994	0.855005
	157	14.8184	0.905744	16.2338	0.870372
	157.5	14.6255	0.840627	16.154	0.862512
	158	14.3897	0.835506	15.9963	0.823357
	158.5	14.8587	0.832879	16.3231	0.773772
	159	15.0307	0.930133	16.2164	0.731033
	159.5	15.2026	0.922222	16.2831	0.745898
	160	15.0794	0.957085	16.145	0.759157
	160.5	15.732	1.03628	16.4043	0.760741
	161	15.0779	0.84744	16.3244	0.793468
	161.5	14.7905	0.842537	16.4205	0.753244
	162	14.8497	0.922594	16.3094	0.710814
	162.5	15.1037	0.958845	16.454	0.727984
	163	14.902	0.946713	16.4264	0.695911
	163.5	15.1933	0.941949	16.3346	0.705283
	164	15.4827	0.910417	16.3833	0.763535
	164.5	15.4606	0.881212	16.5442	0.807622
	165	15.7154	0.837548	16.452	0.874099
	165.5	15.8034	0.804344	16.5658	0.851158
	166	15.5547	0.801433	16.4631	0.856494
	166.5	15.4056	0.851225	16.2375	0.866631
	167	15.5612	0.836677	16.3515	0.840338
	167.5	15.5324	0.86775	16.3257	0.770857
	168	15.6169	0.847205	16.2593	0.809911
	168.5	15.5141	0.839181	16.3843	0.754371
	169	15.3335	0.94691	16.4535	0.793245
	169.5	15.1897	0.965937	16.3982	0.77944
	170	15.0645	0.99326	16.3759	0.858097
	170.5	14.9059	0.977927	16.3873	0.888126
	171	15.2749	0.991409	16.3128	0.844317
	171.5	15.1126	0.96454	16.1924	0.822831
	172	15.1222	1.03656	16.1303	0.828635
	172.5	15.2316	0.983602	16.2352	0.823625
	173	15.3678	0.985642	16.2365	0.778345
	173.5	15.0961	0.923351	16.2412	0.871136
	174	15.1088	0.903014	16.1284	0.882454
	174.5	15.1953	0.875089	16.146	0.861596
	175	15.2824	0.86593	16.1243	0.803928
	175.5	15.2436	0.796896	16.0917	0.824946
	176	15.066	0.814403	16.0146	0.860008
	176.5	15.0153	0.819754	16.0488	0.820476
	177	15.0424	0.880265	16.2505	0.77781
	177.5	15.1735	0.943259	16.1704	0.753919
	178	15.4052	0.925832	16.139	0.740189
	178.5	15.7305	0.951498	16.006	0.763722
	179	15.4995	0.876892	16.182	0.712621
	179.5	15.9249	1.05436	16.0646	0.706005
	180	16.0666	0.98719	16.29	0.733148
	180.5	16.0451	1.00048	15.9919	0.752689
	181	15.9402	1.01188	15.7122	0.826809
	181.5	15.61	0.915492	15.5546	0.800444
	182	15.7102	0.924315	15.3528	0.81908
	182.5	15.1622	0.901534	15.2707	0.812737
	183	15.1678	0.848643	15.624	0.811986
	183.5	15.355	0.810531	15.6761	0.828187
	184	15.3571	0.768623	15.8777	0.848042
	184.5	15.6446	0.741985	15.8131	0.877157
	185	15.6876	0.765806	16.0577	0.822913
	185.5	15.6957	0.839702	15.8982	0.815919
	186	15.6426	0.852051	16.0706	0.731529
	186.5	15.87	0.910054	15.9231	0.741506
	187	15.7382	0.864361	15.981	0.774754
	187.5	15.48	0.865477	15.7605	0.844696
	188	15.9724	0.96548	15.8344	0.842013
	188.5	15.5834	0.865002	15.8261	0.907839
	189	15.5252	0.859928	15.6683	0.817677
	189.5	15.7582	0.975663	15.7088	0.721312
	190	15.939	0.934949	15.7197	0.73664
	190.5	15.4416	0.833203	15.9824	0.693483
	191	15.4791	0.957607	15.5582	0.738959
	191.5	15.6809	1.04247	15.671	0.710716
	192	15.6546	0.974447	15.6369	0.724318
	192.5	15.6436	1.00269	15.8742	0.814141
	193	15.6163	0.954656	15.7901	0.784764
	193.5	15.6256	0.959733	15.8998	0.819149
	194	15.5822	0.978411	16.2318	0.744885
	194.5	15.8222	0.935685	16.1589	0.781248
	195	15.5512	0.856294	15.7167	0.790262
	195.5	15.9214	0.943695	15.7033	0.777891
	196	15.7155	0.965995	15.9824	0.734183
	196.5	15.6428	0.888108	15.9118	0.811936
	197	15.7483	0.90085	15.9993	0.796289
	197.5	15.6102	0.900269	16.144	0.7495
	198	15.524	0.909375	16.1787	0.782842
	198.5	15.5341	0.89921	15.9474	0.870903
	199	15.2975	0.894973	15.6816	0.925329
	199.5	15.3448	0.861775	15.6472	0.893414
	200	15.0917	0.893934	15.3538	0.844512
	200.5	15.5227	0.888536	15.4067	0.835616
	201	15.353	0.871461	15.6749	0.843804
	201.5	15.119	0.872531	15.7324	0.825502
	202	15.3952	0.912868	15.7586	0.796438
	202.5	15.3707	0.930036	16.1905	0.82251
	203	15.3918	0.981106	16.1251	0.792936
	203.5	15.3777	0.966345	15.9932	0.818047
	204	15.3513	0.994359	15.6624	0.868879
	204.5	15.6752	0.955438	15.8593	0.811771
	205	15.2238	0.905179	15.9871	0.763378
	205.5	15.4037	0.839506	15.504	0.846085
	206	15.4077	0.855633	15.4408	0.85038
	206.5	15.4877	0.791033	15.3451	0.855839
	207	15.1106	0.795538	15.2924	0.889196
	207.5	15.2366	0.802393	15.2287	0.89961
	208	15.1293	0.878253	15.3778	0.892617
	208.5	15.1993	0.909576	15.2232	0.834649
	209	15.5067	0.917872	15.5163	0.826789
	209.5	15.7162	0.857138	15.6822	0.777153
	210	15.1566	0.801332	15.4283	0.850458
	210.5	15.5255	0.824046	15.5561	0.821243
	211	15.4345	0.802508	15.6232	0.846539
	211.5	15.1822	0.833065	15.5681	0.887579
	212	14.8994	0.896855	15.2826	0.874777
	212.5	14.9782	0.934695	15.6949	0.844243
	213	14.4261	0.9008	15.6607	0.815511
	213.5	14.3314	0.867769	15.999	0.812441
	214	14.8318	0.930027	15.8595	0.776504
	214.5	15.0046	0.85581	15.7415	0.84464
	215	15.2677	0.965999	15.7459	0.782238
	215.5	15.2082	0.954117	15.9249	0.773501
	216	15.2728	0.950766	15.8561	0.725802
	216.5	15.49	0.972785	15.6326	0.785408
	217	15.4541	0.975038	15.4188	0.912568
	217.5	15.5018	0.985848	15.7126	0.840164
	218	15.3596	1.0127	15.5402	0.937358
	218.5	15.5698	1.07699	15.6157	0.857763
	219	15.7118	1.08436	16.0894	0.861803
	219.5	15.5372	1.11223	16.1614	0.772736
	220	15.5651	1.06003	16.043	0.839672
	220.5	15.4085	1.06454	15.9529	0.8481
	221	15.3843	1.06128	15.8134	0.834003
	221.5	15.1852	1.05499	15.4391	0.868607
	222	15.5993	1.0212	15.2829	0.909799
	222.5	15.3894	1.06311	15.305	0.849972
	223	15.6606	1.00564	15.4147	0.89761
	223.5	15.6003	1.10777	15.5644	0.894051
	224	16.0737	1.09365	15.5399	0.865609
	224.5	16.004	1.13175	15.5107	0.880572
	225	16.1433	1.13611	15.6458	0.920296
	225.5	16.1444	1.14266	15.5636	0.897822
	226	15.7848	1.16903	15.5833	0.910955
	226.5	15.7349	1.14928	15.8262	0.832629
	227	15.4722	1.15055	15.7937	0.786203
	227.5	15.1618	1.22213	15.8372	0.785884
	228	15.2383	1.20022	15.8713	0.767025
	228.5	15.4902	1.10395	15.7827	0.769668
	229	15.638	1.26711	15.6926	0.73176
	229.5	16.2321	1.21797	15.5025	0.810602
	230	16.3349	1.23333	15.5471	0.789002
	230.5	16.0614	1.18565	15.7125	0.799719
	231	15.9041	1.17862	15.3905	0.854765
	231.5	15.8453	1.12374	15.3066	0.884206
	232	15.7444	1.12827	15.1776	0.888406
	232.5	15.7174	1.08981	15.2005	0.898193
	233	15.8605	1.09038	15.2671	0.876297
	233.5	16.0339	1.12677	15.3654	0.880796
	234	15.8965	1.13985	15.4296	0.812936
	234.5	15.6605	1.10332	15.9411	0.732345
	235	15.3789	1.04114	16.17	0.764471
	235.5	15.6404	1.00145	16.1455	0.702748
	236	15.904	1.03584	15.976	0.748607
	236.5	15.7557	1.00605	15.9021	0.806285
	237	15.9698	1.01446	15.6609	0.781372
	237.5	15.8474	1.04129	15.6397	0.849397
	238	15.5844	1.11486	15.4161	0.931637
	238.5	15.7007	1.07136	15.5455	0.911735
	239	15.7096	1.05746	15.5805	0.902585
	239.5	15.8468	1.16815	15.63	0.910637
	240	15.9739	1.21302	15.4107	0.956538
	240.5	16.1416	1.22343	15.2691	0.898535
	241	16.1118	1.2321	14.9184	0.973291
	241.5	15.8068	1.2324	15.0927	0.899989
	242	15.6795	1.18976	15.2714	0.899209
	242.5	15.6922	1.16806	15.7358	0.839038
	243	15.6608	1.11384	15.7319	0.901991
	243.5	15.6195	1.0279	15.8548	0.849335
	244	15.708	1.02301	16.0566	0.801501
	244.5	15.8288	1.07076	15.8561	0.814701
	245	15.7023	1.02341	15.6416	0.895791
	245.5	15.7697	0.961457	15.4475	0.910516
	246	15.7008	0.948433	15.5276	0.91134
	246.5	15.7662	0.959485	15.5449	0.915042
	247	15.594	1.01382	15.8327	0.967656
	247.5	15.7076	1.04083	15.8878	0.839441
	248	15.5094	1.03474	15.8509	0.768973
	248.5	15.3752	1.09481	16.063	0.760029
	249	14.6676	1.14014	15.3071	0.922149
	249.5	12.7864	1.26718	14.2813	0.917694

## Sheet: Fig.6b
	Time traces						Slope
		Control (unpaired)		1x			Control (unpaired)	1x
	Time (s)	Mean	SEM	Mean	SEM		0.794085	1.2251
	0	-0.0942955	0.353148	-0.122474	0.269065		1.54665	0.899235
	0.5	-0.087044	0.370628	-0.363556	0.544541		1.27965	1.2238
	1	-0.116534	0.464034	-0.253397	0.590632		0.951125	0.857415
	1.5	-0.278753	0.53765	-0.287463	0.624429		0.88846	0.870075
	2	-0.150303	0.532175	-0.45851	0.706623		0.79592	0.71497
	2.5	-0.101477	0.314644	-0.0170862	0.699389		1.7534	1.04223
	3	-0.0656104	0.299665	0.158402	0.524789		0.96142	1.1993
	3.5	-0.0173943	0.417177	0.335145	0.510463
	4	-0.270643	0.319943	0.479869	0.538021
	4.5	-0.430896	0.345891	0.343062	0.458656
	5	-0.503676	0.490133	0.354466	0.576579
	5.5	-0.599164	0.534947	0.684633	0.53909
	6	-0.603733	0.449294	0.322137	0.439324
	6.5	-0.488265	0.38823	0.554433	0.471233
	7	-0.692544	0.279212	0.530151	0.418799
	7.5	-0.620361	0.325755	0.396524	0.387277
	8	-0.633122	0.265492	0.196984	0.34522
	8.5	-0.598288	0.34067	0.470449	0.443252
	9	-0.603142	0.471385	0.247723	0.40631
	9.5	-0.700824	0.480329	0.659506	0.323671
	10	-0.401032	0.28376	0.591085	0.316268
	10.5	-0.340981	0.326989	0.763112	0.342117
	11	-0.508656	0.310288	0.722761	0.337594
	11.5	-0.569601	0.274217	0.655168	0.343505
	12	-0.556854	0.225313	0.126727	0.390306
	12.5	-0.679777	0.303499	0.277169	0.34888
	13	-0.636143	0.296252	0.235332	0.284591
	13.5	-0.619087	0.301815	0.294484	0.296833
	14	-0.453203	0.408091	0.365348	0.296268
	14.5	-0.634641	0.384589	0.294493	0.264823
	15	-0.151104	0.367787	0.0900128	0.397468
	15.5	-0.434019	0.279464	-0.163146	0.242762
	16	-0.154451	0.28469	-0.198093	0.223933
	16.5	0.0211032	0.377069	-0.256159	0.24062
	17	0.186069	0.348651	-0.134198	0.237329
	17.5	-0.147216	0.387628	-0.21916	0.23165
	18	-0.20951	0.445269	0.0730819	0.234408
	18.5	-0.0144822	0.404405	-0.0542658	0.232142
	19	-0.357264	0.117976	0.0859739	0.339722
	19.5	-0.127179	0.217246	0.155859	0.279256
	20	0.101639	0.347262	0.342852	0.245645
	20.5	0.0363636	0.306536	0.0211915	0.149584
	21	-0.100117	0.334997	0.341985	0.193737
	21.5	0.0528486	0.502388	0.467276	0.221924
	22	0.355804	0.435741	0.454294	0.288522
	22.5	-0.318637	0.130948	0.12989	0.301057
	23	-0.0620849	0.225844	0.0496207	0.141135
	23.5	0.0561836	0.27927	-0.10231	0.409586
	24	0.244569	0.358177	0.10497	0.478939
	24.5	0.300766	0.373016	0.190139	0.331017
	25	0.155244	0.393006	0.0442347	0.298745
	25.5	0.222324	0.30479	0.10242	0.243697
	26	-0.00556844	0.301358	0.13197	0.220063
	26.5	0.0226872	0.336281	0.208531	0.222732
	27	0.182818	0.233367	0.165765	0.203234
	27.5	0.216218	0.261531	0.280518	0.257037
	28	0.0305588	0.283598	0.204536	0.19757
	28.5	0.100311	0.287773	0.236707	0.298508
	29	-0.0533017	0.256574	0.0884505	0.298365
	29.5	-0.192237	0.251667	0.285124	0.282541
	30	-0.0786662	0.195673	0.0387952	0.178567
	30.5	0.00468487	0.188004	0.0153951	0.199208
	31	-0.237887	0.203554	0.0488642	0.186776
	31.5	-0.274767	0.196571	-0.0101891	0.146836
	32	-0.280117	0.141505	-0.0593612	0.26398
	32.5	-0.0997315	0.14837	0.115091	0.268158
	33	-0.0135651	0.258834	0.123785	0.240481
	33.5	-0.0490797	0.253438	0.241	0.296506
	34	-0.102733	0.250173	0.561366	0.277252
	34.5	0.179297	0.352874	0.457512	0.36791
	35	0.206485	0.334053	0.424309	0.344815
	35.5	0.272681	0.277846	0.177948	0.324722
	36	0.767387	0.307022	0.186045	0.339184
	36.5	0.563286	0.289086	0.0662417	0.308886
	37	0.330644	0.236887	0.226319	0.361603
	37.5	0.454843	0.284023	0.111565	0.298872
	38	0.612681	0.277163	0.174738	0.349721
	38.5	0.331596	0.208197	0.0614202	0.216876
	39	0.0689397	0.29863	-0.212504	0.306019
	39.5	0.428802	0.298096	-0.241951	0.301899
	40	0.1934	0.360284	-0.448794	0.287876
	40.5	0.276817	0.370346	-0.578476	0.256471
	41	0.331125	0.427615	-0.57323	0.292523
	41.5	0.595035	0.328103	-0.514298	0.220191
	42	0.486405	0.317049	-0.256625	0.253506
	42.5	0.552049	0.286899	0.129975	0.330535
	43	0.173323	0.312864	-0.0849122	0.375261
	43.5	0.297121	0.437031	-0.0537298	0.415518
	44	0.203342	0.505641	0.00148663	0.325359
	44.5	0.309367	0.480105	-0.281283	0.364325
	45	0.176759	0.372502	-0.210615	0.300024
	45.5	0.190569	0.331694	-0.133668	0.403035
	46	0.321752	0.360464	-0.298228	0.208405
	46.5	0.28986	0.357561	-0.12097	0.347552
	47	0.380679	0.387212	-0.133152	0.38197
	47.5	0.321099	0.352062	-0.0713407	0.430767
	48	0.475284	0.253265	0.0404783	0.31808
	48.5	0.685262	0.258456	0.220032	0.342541
	49	0.92219	0.213348	-0.00646097	0.458036
	49.5	0.804351	0.195683	-0.261156	0.301723
	50	0.547962	0.248906	-0.410069	0.373311
	50.5	0.458628	0.342633	-0.241185	0.381426
	51	0.399184	0.34403	-0.334841	0.32801
	51.5	0.381646	0.306956	0.00946912	0.24424
	52	0.356072	0.327691	0.190896	0.2925
	52.5	0.299298	0.284024	0.28868	0.261381
	53	0.339039	0.295365	0.174478	0.240778
	53.5	0.367438	0.235421	-0.446602	0.220556
	54	0.338554	0.368559	-0.406167	0.234719
	54.5	0.239517	0.281252	-0.467451	0.289408
	55	0.155721	0.268241	-0.784133	0.265801
	55.5	0.0533043	0.272318	-0.766969	0.32194
	56	-0.0273355	0.388514	-0.891642	0.36232
	56.5	-0.240638	0.477533	-1.3512	0.493097
	57	-0.406299	0.61542	-1.42869	0.507148
	57.5	-0.626967	0.69572	-1.40162	0.468286
	58	-0.577868	0.66348	-1.31289	0.440971
	58.5	-0.566617	0.699812	-1.07385	0.444378
	59	-0.478487	0.585875	-0.970594	0.405389
	59.5	-0.608974	0.619621	-0.860938	0.47339
	60	-0.689072	0.688041	-0.828833	0.421639
	60.5	-0.301	0.573431	-1.35397	0.487761
	61	-0.350848	0.555984	-1.32395	0.417462
	61.5	-0.0432558	0.596497	-1.04771	0.401328
	62	0.197913	0.446484	-1.29699	0.517681
	62.5	0.284913	0.372902	-0.641386	0.570968
	63	0.0890949	0.622133	-0.753991	0.525935
	63.5	0.654672	0.686189	-0.510722	0.605424
	64	0.580325	0.823099	-0.267094	0.658324
	64.5	0.343294	0.765232	-0.0125671	0.717321
	65	0.89685	0.787417	0.198411	0.72572
	65.5	1.1409	0.758431	0.713147	0.647602
	66	1.50511	0.725688	1.10048	0.593254
	66.5	2.15556	0.760776	1.19149	0.64996
	67	2.19046	0.786391	1.44239	0.610713
	67.5	2.61871	0.662584	1.84977	0.633178
	68	3.36296	0.695479	1.78892	0.619828
	68.5	3.77704	0.766765	1.91214	0.625024
	69	4.18678	0.95409	2.41629	0.607503
	69.5	4.3927	0.938182	2.93032	0.702385
	70	4.7932	0.981839	3.36626	0.860825
	70.5	5.30938	0.968579	3.66723	0.864078
	71	5.60217	0.914424	3.78072	0.910349
	71.5	6.46996	1.04102	4.02989	0.88006
	72	6.87871	0.998612	4.33156	0.829605
	72.5	7.25371	1.021	5.08448	0.924695
	73	7.42753	1.0579	5.19845	1.0287
	73.5	7.61012	1.0422	5.88011	1.1733
	74	8.05012	1.08558	6.51111	1.2611
	74.5	8.44492	1.00891	7.09431	1.3278
	75	9.22674	1.05569	7.42714	1.36821
	75.5	9.56768	1.05264	7.89527	1.57329
	76	9.76794	1.09744	8.49677	1.57192
	76.5	10.2518	1.15579	9.27731	1.73065
	77	10.6636	1.19412	9.47962	1.71648
	77.5	11.1581	1.17596	10.2946	1.77996
	78	11.5322	1.08857	10.7272	1.78222
	78.5	11.9484	1.03827	11.5228	1.79926
	79	12.0524	1.14131	11.6603	1.81957
	79.5	12.3615	1.14786	12.195	1.75265
	80	12.6755	1.19609	12.55	1.79675
	80.5	13.0401	1.26189	12.7322	1.76693
	81	13.365	1.35222	13.1319	1.60016
	81.5	13.5643	1.20906	13.6571	1.63487
	82	13.8305	1.23873	13.6694	1.64371
	82.5	14.2007	1.14393	14.2557	1.7608
	83	14.4423	1.27427	14.6354	1.67064
	83.5	14.5585	1.19065	14.9623	1.81833
	84	14.7153	1.32781	14.8535	1.63407
	84.5	14.6845	1.40946	15.1229	1.52373
	85	14.8842	1.38597	15.1928	1.55515
	85.5	15.7462	1.34565	15.384	1.57241
	86	16.0405	1.3002	15.5188	1.45689
	86.5	16.3686	1.46823	16.089	1.49163
	87	16.0106	1.34244	16.2224	1.42832
	87.5	16.2143	1.34223	16.3226	1.35949
	88	16.5678	1.2788	16.8299	1.52493
	88.5	16.6542	1.24204	17.3031	1.54184
	89	16.6133	1.18629	17.3964	1.62051
	89.5	16.6858	1.25217	17.6201	1.68591
	90	17.0209	1.18918	17.6242	1.47367
	90.5	16.7557	1.14194	17.8855	1.5423
	91	16.8507	1.19703	18.0465	1.55245
	91.5	16.9243	1.25988	18.045	1.57009
	92	17.1172	1.20357	18.1107	1.53646
	92.5	16.9791	1.17383	18.017	1.50897
	93	17.1371	1.14259	18.0578	1.57272
	93.5	17.2942	1.11547	17.995	1.59395
	94	17.2889	1.04889	18.159	1.61799
	94.5	17.3481	1.11947	18.1175	1.41819
	95	17.6416	1.22514	18.5589	1.53717
	95.5	17.5291	1.25151	18.3829	1.41874
	96	17.5404	1.36311	18.5871	1.54731
	96.5	17.4963	1.39818	18.437	1.5399
	97	17.3267	1.31628	18.0397	1.56695
	97.5	17.4081	1.32113	18.407	1.60981
	98	17.5311	1.3823	18.0856	1.66359
	98.5	17.6455	1.36253	18.2016	1.72678
	99	17.6854	1.39443	18.3496	1.7279
	99.5	17.6272	1.38151	18.7003	1.74932
	100	18.0382	1.49655	18.8963	1.75133
	100.5	17.6531	1.43028	19.1335	1.71604
	101	17.7526	1.41775	19.0914	1.70868
	101.5	18.1166	1.29822	19.0986	1.70876
	102	18.0365	1.35198	18.5422	1.56823
	102.5	17.8793	1.38208	18.0475	1.2649
	103	18.0521	1.26851	17.9046	1.2799
	103.5	17.977	1.25427	18.266	1.3166
	104	18.2961	1.25049	18.371	1.30283
	104.5	18.2831	1.27025	18.5422	1.26332
	105	18.0924	1.20394	18.3596	1.21943
	105.5	18.4816	1.2776	18.2179	1.19261
	106	18.4306	1.24448	18.1724	1.14135
	106.5	18.2109	1.2919	18.4925	1.23866
	107	18.0248	1.25459	18.5554	1.34912
	107.5	18.2754	1.16517	18.5829	1.48012
	108	18.1312	1.15502	18.4165	1.42647
	108.5	17.8628	1.17062	18.6809	1.30014
	109	17.8512	1.08848	18.0535	1.28037
	109.5	18.2157	1.1139	17.7764	1.26837
	110	18.2153	1.27788	17.8463	1.25894
	110.5	17.9582	1.22627	18.3137	1.21169
	111	18.1433	1.16761	18.2403	1.29483
	111.5	18.1255	1.13506	18.122	1.39065
	112	17.9958	1.24663	18.5027	1.4732
	112.5	17.9765	1.22597	18.5649	1.39836
	113	18.3779	1.33393	18.3901	1.47933
	113.5	18.3335	1.37174	18.5159	1.45573
	114	18.2982	1.43926	18.4388	1.41832
	114.5	18.1293	1.3749	18.447	1.50124
	115	18.0581	1.34307	18.3472	1.57154
	115.5	17.9256	1.26548	18.425	1.51904
	116	17.8857	1.22865	18.2846	1.45679
	116.5	17.976	1.22203	18.3752	1.4728
	117	18.0819	1.22144	18.5919	1.46628
	117.5	17.9834	1.21747	18.6631	1.41439
	118	17.8238	1.23936	18.5292	1.40182
	118.5	17.7442	1.26526	18.779	1.40974
	119	17.957	1.28326	18.8264	1.46741
	119.5	18.1922	1.23643	18.7537	1.44597
	120	18.207	1.18604	18.7029	1.47693
	120.5	18.1558	1.22999	19.0557	1.58792
	121	18.265	1.15528	19.0176	1.52601
	121.5	18.4445	1.23707	18.6462	1.48785
	122	18.2057	1.31276	18.794	1.53166
	122.5	18.0448	1.2856	18.7717	1.55487
	123	18.005	1.334	18.7722	1.41205
	123.5	17.7256	1.37925	18.9066	1.51755
	124	18.0575	1.24643	19.143	1.50888
	124.5	17.8854	1.16225	19.2084	1.6418
	125	17.714	1.27072	19.1578	1.50714
	125.5	17.8707	1.2931	19.5463	1.55484
	126	17.6646	1.35091	19.3507	1.66698
	126.5	17.6577	1.42938	19.2472	1.67055
	127	17.9213	1.47078	19.1307	1.63775
	127.5	17.958	1.45368	19.0184	1.62103
	128	17.8227	1.43466	18.9435	1.50755
	128.5	17.9806	1.42078	19.1525	1.42305
	129	18.2662	1.55696	19.183	1.37245
	129.5	18.0914	1.34993	19.3035	1.36819
	130	18.0305	1.3621	19.073	1.42457
	130.5	17.984	1.30526	18.6703	1.41543
	131	17.6988	1.24826	18.601	1.41324
	131.5	17.5752	1.09284	18.5385	1.43682
	132	17.5638	1.22854	18.9724	1.43907
	132.5	17.4969	1.28775	19.1356	1.43564
	133	17.4962	1.45166	19.2437	1.4538
	133.5	17.3503	1.36102	19.288	1.43158
	134	17.5807	1.38915	19.3571	1.53458
	134.5	17.4718	1.34366	19.007	1.34243
	135	17.6359	1.38735	18.7218	1.36634
	135.5	17.6917	1.25802	18.7301	1.35606
	136	17.4949	1.21915	18.814	1.36408
	136.5	17.6011	1.35907	18.8164	1.35995
	137	17.3235	1.46071	18.9528	1.41446
	137.5	17.4529	1.44965	19.0805	1.51818
	138	17.0944	1.51063	19.1182	1.52262
	138.5	17.3439	1.45142	18.8322	1.52777
	139	17.5275	1.42712	19.3159	1.45052
	139.5	17.5646	1.52554	19.2414	1.55315
	140	17.4033	1.61814	19.4298	1.53754
	140.5	17.2997	1.69644	19.6209	1.54578
	141	17.337	1.61726	19.4822	1.63698
	141.5	17.1152	1.66405	19.0775	1.55211
	142	17.2497	1.50866	18.8669	1.52058
	142.5	17.4331	1.60282	18.9233	1.66534
	143	16.9134	1.68771	18.9124	1.60688
	143.5	16.9623	1.64628	19.0908	1.58703
	144	16.992	1.5977	19.1473	1.6539
	144.5	17.1358	1.66454	19.2479	1.72146
	145	16.8158	1.6535	19.2174	1.78731
	145.5	16.8208	1.72258	19.2053	1.8978
	146	17.0602	1.74303	19.6388	2.02449
	146.5	17.2048	1.73439	19.8594	2.18737
	147	16.9162	1.74837	19.2123	2.14836
	147.5	16.9227	1.732	18.6103	1.97331
	148	17.242	1.61762	18.8188	2.0506
	148.5	17.2163	1.57716	18.9758	2.01362
	149	17.4078	1.75355	18.6984	1.77189
	149.5	16.9152	1.58954	18.6878	1.84644
	150	17.1205	1.76887	19.0804	1.92776
	150.5	17.0598	1.5995	19.0849	1.91277
	151	17.2117	1.74894	19.3091	1.83941
	151.5	17.0301	1.61445	19.0324	1.83805
	152	17.249	1.63128	19.4656	1.86934
	152.5	16.9756	1.47938	19.0987	1.88109
	153	17.119	1.46522	18.8493	1.9496
	153.5	17.0559	1.55059	18.3	1.85533
	154	17.4793	1.50544	18.5285	1.90632
	154.5	17.2594	1.51711	18.4537	1.93631
	155	17.4226	1.59887	18.6933	1.96879
	155.5	17.5191	1.73388	19.1631	1.98992
	156	17.4056	1.6777	19.0947	2.04292
	156.5	17.3809	1.70021	19.4485	2.0426
	157	16.9844	1.64136	19.6675	2.08532
	157.5	16.8934	1.59523	19.7184	2.12569
	158	16.7102	1.42218	19.9004	2.27074
	158.5	16.8011	1.46873	20.0696	2.35747
	159	16.6475	1.34046	19.8595	2.4565
	159.5	16.8594	1.34311	19.828	2.52703
	160	17.0192	1.34619	20.1024	2.49819
	160.5	17.1644	1.41618	20.3124	2.47723
	161	17.1672	1.52279	20.3741	2.58107
	161.5	17.2889	1.61013	20.3654	2.57699
	162	17.4252	1.70393	20.4402	2.52399
	162.5	17.6223	1.65436	20.5972	2.55069
	163	17.7488	1.60949	20.7336	2.5885
	163.5	17.8142	1.5046	20.5221	2.67478
	164	17.8203	1.51787	20.2744	2.55592
	164.5	17.544	1.50601	20.1064	2.48793
	165	17.5887	1.47022	19.7365	2.44296
	165.5	17.5817	1.36906	19.4026	2.47107
	166	17.4445	1.44528	19.4448	2.41599
	166.5	17.3251	1.53758	19.4933	2.39202
	167	17.5145	1.48557	19.369	2.34133
	167.5	17.4519	1.47807	19.7535	2.40776
	168	17.2758	1.51755	19.8437	2.30343
	168.5	17.5602	1.42593	20.2644	2.46892
	169	17.2292	1.38519	19.8183	2.26441
	169.5	17.4073	1.45883	19.8239	2.35493
	170	17.3185	1.53963	19.7561	2.26062
	170.5	17.6122	1.60629	19.8117	2.30522
	171	17.4146	1.45392	19.3775	2.17401
	171.5	17.7667	1.44214	19.1812	2.06665
	172	17.3799	1.58118	18.9439	2.084
	172.5	18.0208	1.52676	18.8926	2.0729
	173	17.7793	1.59491	18.8923	2.14719
	173.5	18.074	1.47793	19.2175	2.19257
	174	18.0673	1.46127	19.3148	2.18003
	174.5	18.1545	1.44008	19.4144	2.07534
	175	18.0646	1.5277	19.3692	1.95202
	175.5	18.1754	1.44585	19.3787	1.83427
	176	17.939	1.50651	19.4277	1.74816
	176.5	18.099	1.52511	19.1892	1.90877
	177	18.0597	1.54529	19.1511	1.94989
	177.5	17.4853	1.31552	19.1917	1.95813
	178	17.6621	1.52592	19.0025	1.8677
	178.5	17.7664	1.49929	19.0564	1.85974
	179	17.6965	1.56257	18.7682	1.78964
	179.5	17.2796	1.40859	18.7845	1.84359
	180	17.0386	1.58149	18.9885	1.82521
	180.5	17.2514	1.54632	18.8888	1.79461
	181	17.1352	1.47354	19.0226	1.79163
	181.5	17.3741	1.26635	19.1212	1.85407
	182	17.2842	1.27858	19.466	1.92926
	182.5	17.3494	1.24485	19.5211	2.00811
	183	17.5894	1.31061	19.8358	2.01568
	183.5	17.4957	1.27779	19.7411	2.11308
	184	17.5182	1.2926	19.8496	2.16499
	184.5	17.7724	1.38557	19.934	2.17008
	185	17.6183	1.29108	19.8213	2.1215
	185.5	17.8625	1.18154	19.9731	2.16273
	186	17.9238	1.23275	19.6935	2.13197
	186.5	17.6899	1.25181	19.5951	2.02805
	187	17.5286	1.2261	19.4109	2.02334
	187.5	17.4784	1.2002	19.5549	2.03893
	188	17.3033	1.23529	19.5557	2.01811
	188.5	17.323	1.26337	19.9463	2.03145
	189	17.2082	1.44051	19.8235	2.0114
	189.5	17.1014	1.4618	20.0072	2.00453
	190	17.0168	1.57588	19.6738	1.87479
	190.5	17.1741	1.40577	19.4986	1.93623
	191	17.4595	1.3727	19.4285	1.95254
	191.5	17.7959	1.23504	19.4262	2.03661
	192	17.7652	1.17477	19.2973	2.0066
	192.5	17.9299	1.21104	19.3636	2.15582
	193	17.5252	1.30043	19.2144	2.10975
	193.5	17.5028	1.31425	19.2091	2.27415
	194	17.4873	1.32285	19.1559	2.23293
	194.5	17.3736	1.25861	19.0711	2.19637
	195	17.7558	0.937102	19.2602	2.13005
	195.5	17.7354	1.02452	19.5064	2.11309
	196	17.6751	1.07624	19.9509	2.08948
	196.5	17.6631	1.17816	20.2952	2.07945
	197	18.0584	1.27069	20.1631	2.02966
	197.5	17.9829	1.38087	20.3791	2.10585
	198	17.7261	1.4683	20.3226	2.04965
	198.5	17.7823	1.28508	19.9761	2.14528
	199	18.0713	1.35744	20.0752	2.30625
	199.5	18.2019	1.3228	19.9139	2.23752
	200	18.3339	1.33763	20.0333	2.18759
	200.5	18.1004	1.29676	19.8282	2.13391
	201	17.9831	1.28079	20.0255	2.26939
	201.5	17.957	1.30013	19.88	2.21933
	202	17.9065	1.32845	19.7639	2.28597
	202.5	17.5884	1.23548	19.7783	2.29835
	203	17.963	1.31222	20.071	2.25364
	203.5	18.0427	1.30561	20.2023	2.28722
	204	18.1474	1.17291	20.6115	2.26717
	204.5	17.8438	1.24084	20.6325	2.36408
	205	17.8463	1.07604	20.443	2.33657
	205.5	17.6914	1.11195	20.8189	2.44392
	206	17.7332	1.11008	20.9418	2.56308
	206.5	17.6756	1.0709	20.8284	2.66769
	207	17.8877	1.07451	21.0819	2.60529
	207.5	18.3924	1.04382	20.9653	2.53848
	208	18.7022	1.09419	20.3442	2.49093
	208.5	18.7771	1.09189	20.1233	2.2851
	209	18.8434	0.974327	20.0844	2.30513
	209.5	18.6865	1.05053	20.0713	2.19853
	210	18.8418	1.02198	20.2479	2.32351
	210.5	18.7925	0.995482	20.3957	2.30579
	211	19.1973	1.00079	20.3896	2.28594
	211.5	19.1982	0.967329	20.5532	2.21192
	212	19.3206	1.04709	20.8527	2.15491
	212.5	19.1059	1.01481	20.9337	2.11317
	213	19.0537	1.07962	20.6224	1.97493
	213.5	19.0391	1.03767	20.8182	2.16377
	214	18.8851	1.10858	20.3169	2.30937
	214.5	18.706	1.0316	20.8028	2.2241
	215	18.6247	1.05725	20.5726	2.3502
	215.5	18.7273	1.09703	20.9028	2.44102
	216	18.8931	1.16143	21.047	2.43227
	216.5	18.9506	1.05502	21.3172	2.41642
	217	19.0803	1.18962	21.0625	2.30853
	217.5	19.3249	1.17347	20.7598	2.32748
	218	18.8865	1.14009	20.8178	2.30375
	218.5	18.5598	1.23165	21.0174	2.24839
	219	18.4874	1.26887	20.7854	2.20263
	219.5	18.4299	1.26303	20.3545	2.27983
	220	18.2305	1.24533	20.6913	2.26911
	220.5	18.306	1.37603	20.6112	2.25619
	221	18.51	1.34481	20.276	2.27558
	221.5	18.7658	1.44672	20.3637	2.37794
	222	18.3413	1.35814	20.5953	2.36257
	222.5	18.2896	1.43884	20.5857	2.29505
	223	18.2116	1.29981	20.6128	2.3547
	223.5	18.0438	1.37214	20.715	2.38703
	224	17.801	1.23509	20.5681	2.34196
	224.5	18.0474	1.27634	20.6659	2.27168
	225	17.9691	1.3153	20.9086	2.33782
	225.5	18.2835	1.23842	20.4768	2.134
	226	18.485	1.47779	20.6032	2.15503
	226.5	18.9188	1.35174	20.7359	2.22106
	227	18.7261	1.40809	21.0061	2.32204
	227.5	18.874	1.08522	20.8772	2.30066
	228	18.2525	1.20507	20.8861	2.40819
	228.5	18.306	1.13171	20.7342	2.37743
	229	18.634	1.22018	20.8324	2.32467
	229.5	18.5471	1.15708	20.6829	2.35991
	230	18.6115	1.19189	20.7394	2.44503
	230.5	18.8131	1.07739	20.8216	2.38148
	231	18.5042	1.08732	21.0494	2.371
	231.5	18.4523	1.14412	21.0557	2.43784
	232	18.6158	1.19487	21.3336	2.57677
	232.5	18.5103	1.06224	21.3349	2.52823
	233	18.4365	1.11191	21.0617	2.40582
	233.5	18.3435	1.14174	20.893	2.3388
	234	18.2452	1.17953	21.2389	2.29063
	234.5	18.2248	1.19702	21.0682	2.25829
	235	18.2991	1.25339	20.8731	2.26193
	235.5	18.5173	1.21071	21.0924	2.2465
	236	18.481	1.17389	20.7724	2.3191
	236.5	18.652	1.07564	20.7014	2.34697
	237	18.4572	1.09979	20.7933	2.39796
	237.5	18.5129	1.06666	20.9049	2.33151
	238	18.2444	1.06239	20.8243	2.38669
	238.5	18.4355	1.14182	20.9911	2.5121
	239	18.6775	1.17372	21.2272	2.48111
	239.5	18.8132	1.10312	21.3298	2.49126
	240	18.7536	1.12136	21.3487	2.55092
	240.5	18.4625	1.16409	21.1359	2.42462
	241	18.4412	1.14416	21.1352	2.50798
	241.5	18.3993	1.22373	21.0137	2.59132
	242	18.4192	1.26207	21.0798	2.50665
	242.5	18.2734	1.17383	21.1444	2.5722
	243	18.0128	1.06977	21.1667	2.39225
	243.5	18.0979	1.00288	21.0628	2.42506
	244	18.1037	1.08433	21.0957	2.46573
	244.5	17.9841	1.04287	21.005	2.55497
	245	18.2554	0.969827	20.99	2.51892
	245.5	18.038	1.06502	21.221	2.69765
	246	17.9845	1.03427	21.3288	2.65227
	246.5	17.635	1.17802	21.097	2.64381
	247	18.0381	1.17735	20.7008	2.71006
	247.5	18.1151	1.07563	20.6443	2.66537
	248	18.4002	1.04981	20.5474	2.59506
	248.5	18.4556	1.11521	20.5863	2.71344
	249	18.1563	1.15504	20.1763	2.72688
	249.5	17.1216	1.31037	19.2623	2.4569

## Sheet: Fig.6c
	Time traces						Slope
		DAMB RNAi KK110947					DAMB RNAi KK110947
		Control (unpaired)		1x			Control (unpaired)	1x
	Time (s)	Mean	SEM	Mean	SEM		1.38615	1.5814
	0	0.731951	0.303738	0.00595391	0.408712		0.96338	1.6884
	0.5	1.03326	0.328405	0.280832	0.691772		1.1415	1.17505
	1	1.05909	0.374843	0.488844	0.731758		0.759995	1.18435
	1.5	0.841869	0.437881	0.120761	0.665126		0.920515	2.03195
	2	0.689571	0.355082	0.365314	0.625817		1.2636	1.01861
	2.5	0.692	0.394765	0.291818	0.659756		0.89323	2.1759
	3	0.411198	0.452879	0.233554	0.64165		1.27106	1.15315
	3.5	0.385987	0.382916	0.358752	0.59694		0.6578	1.2599
	4	0.390629	0.359177	0.277649	0.603144		0.76389
	4.5	0.49244	0.401862	-0.0997502	0.570091		0.686535
	5	0.356654	0.305816	-0.101321	0.542688		0.836895
	5.5	0.573265	0.361037	-0.196004	0.546523
	6	0.634458	0.380299	-0.372719	0.688082
	6.5	0.567654	0.403247	-0.340683	0.556262
	7	0.654484	0.42133	-0.322067	0.575194
	7.5	0.883663	0.294813	-0.166334	0.477401
	8	0.526648	0.249183	0.0697623	0.360239
	8.5	0.440147	0.277915	-0.100828	0.383738
	9	0.346604	0.31247	0.0236674	0.319473
	9.5	-0.0704928	0.299981	0.0829591	0.303729
	10	-0.208002	0.30996	0.0635413	0.28478
	10.5	0.110702	0.380801	-0.00930748	0.198739
	11	0.0562267	0.324023	0.263315	0.224916
	11.5	0.062332	0.355259	0.0671321	0.231577
	12	0.096067	0.375814	0.0888675	0.265236
	12.5	0.287305	0.419822	0.312781	0.321157
	13	0.00725981	0.36818	0.206906	0.33764
	13.5	-0.138408	0.302947	0.14165	0.30807
	14	-0.360602	0.286355	0.0925964	0.367801
	14.5	-0.381237	0.26167	0.346494	0.115964
	15	-0.457379	0.274587	0.43323	0.221058
	15.5	-0.373348	0.272984	0.168271	0.193419
	16	-0.0343315	0.264737	0.13305	0.226615
	16.5	0.0386913	0.317306	-0.0613018	0.294815
	17	0.0625022	0.338498	-0.0148917	0.247571
	17.5	-0.101333	0.345575	-0.0260406	0.240583
	18	-0.163441	0.349558	0.0450661	0.260267
	18.5	-0.355098	0.338156	0.203873	0.289782
	19	-0.343008	0.299294	-0.0175842	0.225839
	19.5	-0.292389	0.27399	0.0264064	0.199772
	20	-0.46915	0.277057	-0.016161	0.219479
	20.5	-0.60245	0.159372	0.13042	0.258587
	21	-0.647493	0.187597	0.00385928	0.340415
	21.5	-0.44087	0.223619	0.22768	0.40772
	22	-0.267545	0.279046	0.512284	0.420501
	22.5	-0.282659	0.239282	0.7628	0.576127
	23	-0.287497	0.316223	0.591822	0.561337
	23.5	-0.18061	0.35368	0.31156	0.349441
	24	-0.367964	0.280487	-0.342371	0.348764
	24.5	-0.397504	0.284362	-0.0297202	0.411541
	25	-0.296348	0.33467	0.0166538	0.392612
	25.5	-0.0857008	0.298739	0.113258	0.358221
	26	-0.203172	0.29341	0.237977	0.337185
	26.5	-0.0607019	0.301208	0.012531	0.156154
	27	0.0770847	0.291813	0.535945	0.1726
	27.5	0.260398	0.419899	0.480062	0.232888
	28	0.211952	0.35751	0.387918	0.266883
	28.5	0.292164	0.305378	0.35869	0.298912
	29	0.122421	0.350025	0.28557	0.17103
	29.5	0.0987863	0.360726	0.33794	0.223571
	30	-0.0466008	0.290969	0.200284	0.231925
	30.5	-0.214852	0.307256	0.221083	0.264821
	31	-0.0169417	0.303424	0.289018	0.302213
	31.5	-0.292131	0.258211	0.406571	0.269521
	32	-0.360975	0.249178	0.274308	0.414351
	32.5	-0.142493	0.191773	0.39624	0.344533
	33	-0.322965	0.272591	0.518777	0.368957
	33.5	-0.266788	0.26145	0.0370478	0.33282
	34	-0.210742	0.25478	0.188731	0.292729
	34.5	-0.120927	0.185035	0.170397	0.32442
	35	-0.062542	0.238403	-0.264846	0.428733
	35.5	-0.0277375	0.283116	-0.342732	0.536929
	36	0.113373	0.269575	-0.195674	0.557735
	36.5	0.0956554	0.250078	-0.472787	0.495247
	37	0.1515	0.268524	-0.20249	0.239717
	37.5	0.124171	0.269458	-0.333999	0.261592
	38	0.126843	0.265348	-0.103033	0.195042
	38.5	0.238409	0.264448	-0.382388	0.172418
	39	0.441535	0.258027	-0.587795	0.197195
	39.5	0.4429	0.239586	-0.684176	0.295988
	40	0.355269	0.29379	-0.371248	0.319459
	40.5	0.243329	0.238645	-0.546371	0.404327
	41	0.288601	0.281492	-0.745745	0.354714
	41.5	0.287137	0.255928	-0.0248901	0.235445
	42	0.149648	0.267109	-0.0320441	0.350898
	42.5	0.290406	0.198378	-0.375923	0.354923
	43	0.14784	0.196058	0.022001	0.224718
	43.5	0.351207	0.265804	-0.230973	0.30719
	44	0.224734	0.287302	0.0930111	0.420219
	44.5	0.477857	0.307331	-0.285689	0.398743
	45	0.291385	0.290742	-0.306527	0.370141
	45.5	0.25815	0.288839	-0.674082	0.373927
	46	0.103843	0.256474	-0.444261	0.361366
	46.5	0.164534	0.28707	-0.234678	0.204594
	47	-0.131779	0.314513	-0.218382	0.284409
	47.5	-0.331242	0.339042	-0.426735	0.315013
	48	-0.14739	0.273316	-0.141616	0.296143
	48.5	-0.266715	0.351776	-0.226824	0.252057
	49	-0.222367	0.395535	-0.475907	0.336403
	49.5	-0.126157	0.342102	-0.115973	0.30299
	50	-0.105873	0.349991	-0.240311	0.305069
	50.5	-0.18521	0.475395	-0.15112	0.382571
	51	-0.0778726	0.393801	-0.0270933	0.371076
	51.5	-0.216588	0.393272	-0.067752	0.377295
	52	-0.465678	0.46264	-0.332144	0.443958
	52.5	-0.0519927	0.430477	-0.371055	0.372487
	53	-0.144058	0.426318	-0.461974	0.432374
	53.5	-0.158124	0.485359	-0.453582	0.292561
	54	0.0599756	0.433768	0.0499572	0.361834
	54.5	0.166117	0.384943	0.0510717	0.27519
	55	-0.183655	0.411315	0.080136	0.400285
	55.5	-0.590877	0.449152	-0.127218	0.430539
	56	-0.651148	0.377044	0.0202408	0.489478
	56.5	-0.96218	0.403205	-0.531704	0.490868
	57	-0.861738	0.304542	-0.768795	0.539091
	57.5	-0.926437	0.31221	-0.834842	0.526942
	58	-0.702715	0.402887	-0.809544	0.438234
	58.5	-0.475714	0.460654	-0.349277	0.546915
	59	-0.535178	0.425514	-0.491953	0.450572
	59.5	-0.575419	0.446531	-0.408991	0.372741
	60	-0.0314886	0.451813	-0.58776	0.376067
	60.5	0.185787	0.421464	-0.332239	0.287017
	61	0.459547	0.588472	-0.540289	0.217783
	61.5	1.08491	0.472596	-0.479825	0.214489
	62	1.27674	0.397432	0.0628815	0.33449
	62.5	1.20753	0.482903	0.630027	0.398459
	63	1.67875	0.509363	1.1019	0.477107
	63.5	1.81474	0.623827	1.72228	0.621084
	64	1.6251	0.645534	2.32268	0.734795
	64.5	2.11967	0.727483	2.54649	0.811797
	65	2.26982	0.715907	3.37104	0.975742
	65.5	2.48849	0.776444	3.65612	1.016
	66	2.63468	0.817203	4.63511	1.11959
	66.5	3.15762	0.893675	5.70051	1.13389
	67	4.02484	0.673427	6.43351	1.17955
	67.5	3.80007	0.8891	7.11048	1.20644
	68	4.18729	0.806554	7.69461	1.19426
	68.5	4.79683	0.731667	8.19116	1.16695
	69	5.10794	0.746456	8.6352	1.11584
	69.5	5.28112	0.839267	9.03295	1.15142
	70	5.88641	0.79944	9.75521	1.19581
	70.5	6.55208	0.843699	10.5983	1.2551
	71	7.15881	0.906893	10.8867	1.3887
	71.5	7.41135	0.910921	11.1817	1.364
	72	7.74379	0.979254	11.3201	1.33143
	72.5	8.15151	1.00273	11.8154	1.34883
	73	8.53863	1.05158	12.2892	1.23381
	73.5	8.69402	1.05554	12.574	1.28587
	74	8.78491	1.06479	12.9251	1.27638
	74.5	9.03038	1.11367	13.3277	1.32606
	75	9.64294	1.25927	13.4433	1.19215
	75.5	9.70292	1.29959	13.7726	1.17483
	76	10.0691	1.33294	13.6454	1.11194
	76.5	10.4166	1.37008	14.1808	1.08584
	77	10.9148	1.30468	14.0307	1.19601
	77.5	11.075	1.31792	14.5264	1.31823
	78	11.4225	1.34227	14.5571	1.18604
	78.5	11.9729	1.18654	15.4819	1.28351
	79	12.001	1.35308	15.4355	1.31564
	79.5	12.0925	1.24928	15.6843	1.29214
	80	12.3383	1.2507	15.9406	1.2436
	80.5	12.5092	1.2738	15.945	1.2039
	81	12.679	1.36176	15.9659	1.21904
	81.5	13.1202	1.20662	15.6343	1.30607
	82	12.9452	1.32706	15.6194	1.36859
	82.5	13.042	1.3187	15.736	1.4248
	83	13.2212	1.36313	16.0714	1.43834
	83.5	13.404	1.17515	16.1822	1.47115
	84	13.3326	1.36043	16.1088	1.43365
	84.5	13.8333	1.39451	16.0965	1.42266
	85	14.7044	1.36479	16.119	1.41154
	85.5	14.5829	1.4452	16.1451	1.34541
	86	14.7035	1.47723	16.547	1.36306
	86.5	14.7454	1.37892	16.5787	1.31748
	87	14.4322	1.60973	16.4257	1.24275
	87.5	14.2447	1.67646	16.335	1.36898
	88	14.3905	1.65326	16.5602	1.39202
	88.5	14.187	1.67611	16.114	1.39346
	89	14.4027	1.61893	16.2158	1.38623
	89.5	14.5307	1.63115	16.1302	1.57619
	90	14.7331	1.59685	15.8732	1.68827
	90.5	14.5427	1.4148	16.3073	1.66482
	91	14.7146	1.44591	16.4601	1.56866
	91.5	14.929	1.43561	16.5796	1.5616
	92	15.0201	1.45035	16.8909	1.52651
	92.5	15.0547	1.40432	16.8975	1.45835
	93	15.0631	1.40636	17.0245	1.46154
	93.5	15.3804	1.28274	16.8566	1.48126
	94	15.2541	1.26497	17.1175	1.58967
	94.5	15.4062	1.20571	17.2463	1.60246
	95	15.2588	1.18203	17.2279	1.57541
	95.5	15.815	1.16112	17.6882	1.59512
	96	15.6242	1.19902	17.7208	1.54295
	96.5	15.7479	1.12051	17.3781	1.43111
	97	15.7842	1.09387	17.0017	1.54925
	97.5	15.8983	1.12743	16.946	1.5332
	98	15.566	1.14322	16.3617	1.52293
	98.5	15.3611	1.2821	16.2716	1.52098
	99	15.6384	1.25649	16.6301	1.51826
	99.5	15.755	1.27596	16.9949	1.4169
	100	15.5602	1.21858	17.0314	1.57349
	100.5	15.6787	1.2363	17.6148	1.49187
	101	15.6614	1.13222	17.5699	1.4608
	101.5	15.6495	1.15649	17.4079	1.39821
	102	15.7721	1.20139	17.094	1.50803
	102.5	15.8004	1.24769	16.8146	1.4051
	103	15.8687	1.28494	16.5678	1.40294
	103.5	16.0605	1.34393	16.3932	1.38263
	104	15.4098	1.33544	16.4372	1.4947
	104.5	15.368	1.35935	16.5172	1.49206
	105	15.7963	1.29241	16.6782	1.49818
	105.5	15.8573	1.31847	16.9049	1.56735
	106	15.9123	1.36571	16.8201	1.508
	106.5	16.1082	1.4072	16.9935	1.4713
	107	16.2582	1.42152	16.9815	1.43666
	107.5	16.3158	1.39312	16.8865	1.53933
	108	16.2196	1.36691	16.7806	1.55082
	108.5	15.9037	1.35607	17.0963	1.53335
	109	16.2981	1.23855	16.9412	1.5115
	109.5	16.0642	1.27414	16.7703	1.60496
	110	16.0311	1.31606	17.1295	1.61614
	110.5	16.3891	1.2725	17.2711	1.63473
	111	16.4712	1.2754	16.959	1.56737
	111.5	16.5383	1.31042	17.268	1.67567
	112	16.8167	1.31682	17.0096	1.63033
	112.5	17.1963	1.29745	16.948	1.56876
	113	17.0676	1.32058	16.7603	1.60416
	113.5	17.1963	1.39035	16.7655	1.45898
	114	17.0839	1.36132	16.9399	1.42645
	114.5	16.9352	1.32704	16.9457	1.36475
	115	16.7206	1.30006	17.1777	1.42483
	115.5	16.6621	1.23184	17.1761	1.35954
	116	16.6887	1.32198	17.0415	1.36678
	116.5	16.6604	1.30666	16.7938	1.49181
	117	16.1711	1.36611	16.6202	1.57983
	117.5	16.4207	1.38104	16.818	1.65509
	118	16.3508	1.48417	16.601	1.6942
	118.5	16.3555	1.4413	17.0049	1.68465
	119	16.723	1.43959	17.0756	1.74762
	119.5	16.5278	1.2936	17.1304	1.61396
	120	16.7666	1.28898	16.8661	1.68911
	120.5	17.0066	1.32094	17.3439	1.67916
	121	16.9356	1.3087	16.9184	1.68891
	121.5	16.8889	1.22178	16.6947	1.6699
	122	16.7567	1.27721	16.5493	1.68761
	122.5	16.876	1.37094	16.9186	1.63734
	123	16.7767	1.2781	16.7668	1.61884
	123.5	16.8682	1.19712	16.5506	1.58623
	124	16.8929	1.21772	16.7211	1.57593
	124.5	16.6367	1.23828	16.845	1.56449
	125	16.4473	1.20633	16.8568	1.59045
	125.5	16.5169	1.1617	16.9394	1.56791
	126	16.7073	1.22543	16.7976	1.56252
	126.5	16.485	1.20456	16.8914	1.57439
	127	16.4091	1.14869	16.6005	1.61922
	127.5	16.4642	1.14338	16.6856	1.66992
	128	16.3641	1.16393	16.7344	1.47889
	128.5	16.2502	1.16461	16.669	1.45388
	129	16.1763	1.16835	16.7726	1.48945
	129.5	16.3263	1.30156	16.8265	1.54864
	130	16.7388	1.22817	16.7157	1.51984
	130.5	17.0847	1.23189	16.7499	1.60376
	131	17.108	1.23341	16.6149	1.62352
	131.5	16.9418	1.32665	16.4757	1.6786
	132	16.8573	1.18276	16.5884	1.60509
	132.5	16.7462	1.24954	16.6133	1.58875
	133	16.7324	1.16653	16.5967	1.56208
	133.5	16.8688	1.14301	16.5478	1.63525
	134	16.6564	1.23054	16.6342	1.57881
	134.5	16.4723	1.2169	17.0016	1.48724
	135	16.5813	1.21707	16.8585	1.586
	135.5	16.7215	1.20685	16.9908	1.5754
	136	16.6698	1.18764	17.1279	1.57617
	136.5	16.8282	1.22459	17.2925	1.5729
	137	16.8939	1.17003	16.8002	1.71846
	137.5	16.5801	1.38036	16.783	1.74249
	138	16.5926	1.38342	16.7638	1.73939
	138.5	16.5909	1.32023	16.6217	1.7004
	139	16.5973	1.3239	16.8266	1.64081
	139.5	16.5595	1.34668	17.2364	1.59603
	140	16.6675	1.2626	17.2955	1.64126
	140.5	16.5666	1.26267	17.4661	1.61224
	141	16.807	1.29708	17.1332	1.60084
	141.5	17.1084	1.20616	16.4943	1.62191
	142	16.6004	1.15037	16.3266	1.6193
	142.5	16.7644	1.22734	16.1475	1.57639
	143	16.8496	1.26212	16.0358	1.65784
	143.5	16.7712	1.19751	16.2735	1.61892
	144	16.5789	1.25806	16.5089	1.66289
	144.5	17.4142	1.22966	16.4221	1.65482
	145	17.6747	1.3019	16.2822	1.5852
	145.5	17.6578	1.31811	16.7251	1.6605
	146	17.5935	1.27644	17.0142	1.67241
	146.5	17.9735	1.36924	17.1273	1.64951
	147	17.3454	1.38636	17.0857	1.61612
	147.5	17.053	1.37512	17.0001	1.54929
	148	16.9687	1.38513	16.8244	1.43538
	148.5	17.3192	1.39907	16.6664	1.48458
	149	17.3941	1.39021	16.4396	1.54579
	149.5	17.5007	1.28709	16.681	1.53322
	150	17.5861	1.31906	16.7689	1.68074
	150.5	17.5467	1.29443	16.7912	1.74045
	151	17.4721	1.31929	16.8837	1.69782
	151.5	17.2542	1.28005	16.9344	1.66529
	152	17.2566	1.30804	16.6381	1.51358
	152.5	17.395	1.20469	16.7259	1.5783
	153	17.3122	1.17753	16.3595	1.68762
	153.5	17.4847	1.21625	16.4456	1.708
	154	17.6833	1.44506	16.676	1.68812
	154.5	17.8147	1.44139	16.9962	1.62532
	155	17.5735	1.3344	17.1078	1.67512
	155.5	17.2864	1.41905	17.1673	1.66684
	156	16.9117	1.4094	17.4563	1.56767
	156.5	16.8831	1.36039	17.1181	1.58974
	157	17.1368	1.42886	16.4015	1.83242
	157.5	17.1079	1.44725	16.8468	1.61893
	158	17.3125	1.46634	17.1698	1.43993
	158.5	17.4603	1.42469	16.9597	1.49959
	159	17.4785	1.51018	16.5385	1.62413
	159.5	17.5248	1.51347	16.7144	1.53091
	160	17.6283	1.49897	16.5669	1.52029
	160.5	17.2647	1.54692	16.565	1.66781
	161	17.3013	1.52746	16.8005	1.68265
	161.5	16.9191	1.3651	16.6664	1.66629
	162	17.2836	1.31993	16.5942	1.73098
	162.5	16.896	1.20302	16.5008	1.72546
	163	17.0808	1.18101	16.7531	1.7221
	163.5	17.2429	1.0984	16.5675	1.70949
	164	17.5039	1.27209	16.2142	1.69767
	164.5	17.6547	1.30873	16.3594	1.59835
	165	17.7196	1.35854	16.2809	1.73839
	165.5	17.4339	1.61747	16.3707	1.80907
	166	17.3841	1.64475	16.2272	1.76908
	166.5	17.4002	1.66803	16.2261	1.71765
	167	17.1869	1.52374	16.496	1.81116
	167.5	17.1609	1.41063	16.6183	1.70758
	168	17.3312	1.37605	16.3793	1.59064
	168.5	17.2344	1.29865	16.6762	1.75679
	169	17.0719	1.31551	16.9216	1.80348
	169.5	17.0877	1.29417	16.8989	1.72003
	170	16.9106	1.31984	17.1467	1.84799
	170.5	17.2466	1.15935	17.349	1.7083
	171	17.5102	1.32606	16.683	1.53122
	171.5	17.4969	1.3156	16.5135	1.52748
	172	17.7126	1.46135	16.4206	1.48688
	172.5	17.8765	1.5972	16.4458	1.59721
	173	17.6928	1.57259	16.3231	1.57588
	173.5	17.6776	1.51391	16.6982	1.67374
	174	17.8858	1.48535	16.9097	1.63621
	174.5	17.8535	1.46597	17.0705	1.74021
	175	17.5602	1.46959	17.2243	1.75056
	175.5	17.7709	1.50054	17.1243	1.80119
	176	17.8047	1.58356	17.2623	1.87298
	176.5	17.5788	1.4892	17.1217	1.80468
	177	17.8205	1.60455	16.9588	1.85054
	177.5	17.6281	1.58053	16.8638	1.83167
	178	17.4432	1.6639	16.749	1.85138
	178.5	17.2633	1.59653	16.6837	1.809
	179	16.8989	1.65803	16.7411	1.74295
	179.5	16.7845	1.72653	16.8172	1.85489
	180	17.3162	1.48121	16.7887	1.8505
	180.5	17.0713	1.72204	16.7974	1.86945
	181	17.2736	1.69228	16.977	1.92963
	181.5	17.34	1.71135	17.0277	1.9743
	182	17.392	1.70743	17.2071	1.89397
	182.5	17.3126	1.73537	17.2467	1.92085
	183	17.1825	1.65418	17.1303	1.84892
	183.5	17.5577	1.58817	16.8613	1.78974
	184	17.0315	1.68917	16.8781	1.73026
	184.5	17.3135	1.58777	16.8968	1.72504
	185	17.3877	1.64769	16.7153	1.77308
	185.5	17.4942	1.53645	16.4217	1.78913
	186	17.5998	1.53073	16.8497	1.85783
	186.5	17.7153	1.43064	17.0448	1.83139
	187	17.5565	1.41487	17.0103	1.90082
	187.5	17.1449	1.46554	16.9536	1.86958
	188	17.1883	1.46396	16.9682	1.82569
	188.5	17.1453	1.55745	16.8805	1.75036
	189	17.0942	1.49857	16.6024	1.61764
	189.5	17.0138	1.5765	17.1767	1.58458
	190	17.1265	1.55403	16.8686	1.58055
	190.5	17.3185	1.61145	17.0668	1.65004
	191	17.1284	1.49711	16.8065	1.86409
	191.5	16.9357	1.56499	16.7815	1.78153
	192	17.4253	1.63857	16.6356	1.83628
	192.5	17.8087	1.74097	16.7572	1.89437
	193	18.1428	1.69191	16.5873	1.7598
	193.5	18.1453	1.70246	16.8855	1.79959
	194	18.0443	1.67808	16.9409	1.74819
	194.5	18.0961	1.65499	17.4612	1.78049
	195	18.0441	1.71599	17.6304	1.72494
	195.5	18.0669	1.73864	17.5217	1.80649
	196	17.9873	1.71611	17.673	1.53566
	196.5	17.2952	1.83798	17.4317	1.60266
	197	17.8189	1.57525	17.2974	1.65866
	197.5	17.8191	1.66589	16.9287	1.7904
	198	17.5965	1.58354	17.1986	1.97319
	198.5	17.6686	1.66313	17.4365	2.0705
	199	17.654	1.59117	17.3937	2.08853
	199.5	17.3561	1.69935	17.3801	2.15182
	200	16.9041	1.61755	17.9117	2.09408
	200.5	16.9102	1.59507	17.3052	2.26137
	201	16.9398	1.57	17.5529	2.19098
	201.5	17.1087	1.59899	18.0512	2.12094
	202	16.9436	1.70377	17.7644	2.05796
	202.5	17.3791	1.73453	17.5842	2.0603
	203	17.4657	1.72336	17.6435	2.04919
	203.5	17.3836	1.64298	17.776	1.98851
	204	17.0229	1.71938	17.0589	2.06386
	204.5	17.0841	1.6166	16.781	2.16246
	205	16.958	1.63916	16.7278	2.17242
	205.5	16.9307	1.67795	16.9922	2.20745
	206	16.8369	1.63129	17.0482	2.24439
	206.5	16.6595	1.62802	17.2405	2.17755
	207	16.8791	1.7439	17.6939	2.05555
	207.5	17.0949	1.69876	18.04	2.21684
	208	17.2064	1.71633	18.2462	2.0568
	208.5	17.501	1.89937	18.1504	2.02778
	209	17.7298	1.79251	18.4049	2.01353
	209.5	17.2374	1.87456	17.8947	2.0519
	210	17.2275	1.98574	17.9248	2.06624
	210.5	17.2076	1.89822	17.42	2.11802
	211	17.2177	1.84041	17.489	2.06135
	211.5	17.5535	1.87654	17.2105	2.16976
	212	17.4206	1.85579	17.0621	2.07881
	212.5	17.2769	1.87457	16.7659	1.92287
	213	17.223	1.86213	16.8121	1.83477
	213.5	17.5228	1.82323	16.921	1.8812
	214	17.4731	1.8328	16.9426	1.76555
	214.5	17.6395	1.91253	17.0991	1.78275
	215	17.9005	1.83054	17.2176	1.86726
	215.5	17.7129	1.88182	17.3781	1.98001
	216	17.612	1.88357	17.2508	1.84761
	216.5	17.5144	1.85958	17.3279	1.84961
	217	17.1639	1.92577	17.0528	1.81416
	217.5	17.0722	1.88842	16.9493	1.6927
	218	16.9166	1.86081	16.7233	1.55902
	218.5	16.823	1.856	17.0682	1.6206
	219	16.7344	1.92946	16.7253	1.81683
	219.5	16.9773	1.92372	17.079	1.88285
	220	16.6695	1.90875	17.1999	1.91036
	220.5	17.0158	1.84304	17.0256	1.89542
	221	17.3676	1.73106	16.3938	1.77911
	221.5	17.3678	1.67898	16.5625	1.6089
	222	17.4639	1.72767	16.4461	1.56168
	222.5	17.5071	1.75829	16.3214	1.71102
	223	17.5104	1.77385	16.6856	1.585
	223.5	17.2024	1.91104	16.7344	1.55232
	224	17.1565	1.99227	17.066	1.52598
	224.5	17.1141	1.95901	16.8893	1.71721
	225	17.0235	1.96724	17.2455	1.56944
	225.5	16.7957	1.97175	16.9778	1.51758
	226	16.856	2.0086	16.6168	1.68009
	226.5	17.1267	1.99184	16.5364	1.66951
	227	17.0622	2.00845	16.7576	1.46056
	227.5	17.3102	2.05047	16.5011	1.38253
	228	17.59	1.94107	16.3188	1.41303
	228.5	17.349	2.04823	16.0873	1.45402
	229	17.5276	1.98435	16.0455	1.48651
	229.5	17.3302	2.0805	16.2896	1.64429
	230	17.2729	1.96813	16.4555	1.58954
	230.5	16.8213	2.00392	16.4716	1.63881
	231	16.8024	1.97391	16.495	1.71356
	231.5	16.6921	2.07934	16.3906	1.7079
	232	16.4645	2.03183	16.9097	1.69108
	232.5	16.8515	2.06339	16.8657	1.67742
	233	16.8225	2.06493	16.3452	1.59472
	233.5	17.0083	2.01802	16.9703	1.62661
	234	16.919	1.97037	17.2286	1.67882
	234.5	16.9297	1.91946	16.6446	1.72179
	235	16.6782	1.96805	16.6479	1.72627
	235.5	16.6166	1.96971	17.0454	1.70282
	236	16.6324	1.92954	16.6663	1.85231
	236.5	16.6636	1.83919	16.5739	1.85056
	237	16.5777	1.8731	17.1274	1.68635
	237.5	16.4182	2.04601	17.3598	1.4824
	238	16.3919	2.00822	17.3659	1.6671
	238.5	16.2644	2.0474	17.2942	1.71198
	239	16.3563	2.12866	16.8271	1.66192
	239.5	16.5292	2.08771	16.7052	1.72227
	240	16.39	2.11329	16.5902	1.77352
	240.5	16.4431	2.13456	16.342	1.81122
	241	16.4138	2.06602	16.1647	1.79677
	241.5	16.5946	2.15138	16.6204	1.87307
	242	16.4216	2.13868	16.3843	1.84037
	242.5	16.5598	2.21434	16.1447	1.67954
	243	16.8728	2.11843	16.6115	1.75683
	243.5	16.4166	2.18415	16.9835	1.5757
	244	16.6226	2.12183	16.6784	1.61349
	244.5	16.642	2.15138	16.9137	1.73614
	245	16.5704	2.23613	16.7101	1.74807
	245.5	16.5631	2.31733	16.5167	1.84746
	246	16.8092	2.32703	16.3605	1.8795
	246.5	16.4113	2.26708	16.743	1.90609
	247	16.2389	2.21774	16.9489	1.88772
	247.5	16.2274	2.2121	17.2101	1.7964
	248	16.4283	2.23714	17.0809	1.73239
	248.5	16.4411	2.23176	17.1212	1.67116
	249	16.2123	2.24637	16.7867	1.63645
	249.5	14.8677	2.31803	16.2459	1.6025

## Sheet: Fig.6d
	Time traces						Slope
		PKCδ RNAi JF02991					PKCδ RNAi JF02991
		Control (unpaired)		1x			Control (unpaired)	1x
	Time (s)	Mean	SEM	Mean	SEM		0.51927	1.2931
	0	0.519354	1.20999	-1.15684	0.927844		0.82127	1.6693
	0.5	1.18257	1.11828	-0.142233	0.816415		0.22975	1.0391
	1	1.53338	1.06814	0.345495	0.846022		1.1858	1.35245
	1.5	1.59505	1.08333	0.224481	0.797237		0.8138	0.958225
	2	1.23132	1.01413	0.636322	0.796591		0.62076	2.06955
	2.5	1.1604	1.03805	0.564167	0.724189		0.94753	1.5684
	3	1.29712	1.00141	0.574117	0.727698		0.93437	1.6746
	3.5	1.15504	1.04782	0.39076	0.67593		0.4378
	4	1.19859	1.01977	0.533968	0.604002		0.96368
	4.5	1.11155	1.02445	0.277993	0.564921
	5	0.968958	0.995729	0.414602	0.658112
	5.5	0.986296	1.00394	0.128574	0.57366
	6	0.613958	0.989616	0.0811181	0.564617
	6.5	0.468733	0.936022	-0.0700603	0.569452
	7	0.591901	0.866001	-0.0136861	0.549021
	7.5	0.61485	0.814932	0.0133994	0.460213
	8	0.355631	0.747723	0.0362011	0.423166
	8.5	0.663633	0.719646	0.245594	0.483806
	9	0.606179	0.81019	0.423103	0.454814
	9.5	0.680196	0.759139	0.379756	0.44088
	10	0.66195	0.75096	0.211451	0.497624
	10.5	0.571908	0.696159	0.140606	0.409709
	11	0.571904	0.668325	0.136305	0.306548
	11.5	0.887588	0.659182	0.0627315	0.199743
	12	0.885576	0.660291	0.0299284	0.326361
	12.5	0.582836	0.608107	0.00728892	0.235211
	13	0.86968	0.604568	0.103629	0.355724
	13.5	0.473034	0.552427	0.158608	0.392294
	14	0.127552	0.431967	-0.030696	0.41459
	14.5	0.232272	0.34934	-0.194388	0.375197
	15	0.203872	0.364226	-0.140071	0.383842
	15.5	0.200464	0.351055	-0.149106	0.438112
	16	0.0469017	0.352158	0.0580857	0.433678
	16.5	0.217136	0.344562	0.264431	0.344807
	17	0.387304	0.447889	-0.262264	0.284727
	17.5	0.269061	0.417265	-0.11627	0.265383
	18	0.410172	0.371773	0.0817077	0.199178
	18.5	0.306044	0.265327	0.0936652	0.175482
	19	0.57905	0.293278	0.167863	0.175225
	19.5	0.539567	0.267079	0.408166	0.173495
	20	0.600109	0.347495	0.278984	0.193903
	20.5	0.356277	0.287522	0.102621	0.180931
	21	0.67757	0.333867	-0.104519	0.248534
	21.5	0.313498	0.299384	-0.149557	0.275532
	22	0.284949	0.308433	0.0227494	0.180891
	22.5	0.363181	0.20358	0.183083	0.109046
	23	0.633371	0.20002	0.00108703	0.193952
	23.5	0.75195	0.60338	-0.0157107	0.206283
	24	0.783437	0.588361	-0.0690006	0.157974
	24.5	0.995319	0.562605	-0.158763	0.182565
	25	0.351927	0.228196	-0.00866283	0.0989284
	25.5	0.386264	0.347472	-0.017686	0.157371
	26	0.271018	0.386683	-0.0930023	0.241638
	26.5	0.462687	0.353228	0.0122693	0.246273
	27	0.0219417	0.309608	0.0817334	0.267934
	27.5	-0.0143664	0.31656	0.130235	0.298142
	28	0.167258	0.38497	0.0201901	0.351972
	28.5	0.112754	0.245576	0.0784127	0.2403
	29	0.0386228	0.247437	0.109234	0.290212
	29.5	0.202247	0.243163	-0.034012	0.263645
	30	0.112699	0.204191	0.239416	0.337888
	30.5	0.142113	0.172605	0.158707	0.218789
	31	0.603227	0.258209	0.311107	0.21668
	31.5	0.623653	0.266813	0.477623	0.157363
	32	0.286136	0.281736	0.240846	0.164229
	32.5	0.283572	0.265274	-0.203348	0.157032
	33	0.0288703	0.315897	-0.224708	0.235859
	33.5	-0.251611	0.35203	-0.422246	0.166508
	34	-0.24528	0.381357	-0.411075	0.137242
	34.5	-0.0347781	0.425743	0.356909	0.377662
	35	-0.0840326	0.384834	0.437467	0.323855
	35.5	-0.170727	0.358397	0.457482	0.267826
	36	-0.207704	0.395953	-0.0558694	0.210394
	36.5	-0.195846	0.449122	-0.0462663	0.23909
	37	-0.662498	0.483923	-0.340986	0.295914
	37.5	-0.583309	0.505764	-0.455032	0.336804
	38	-0.872492	0.544498	-0.142927	0.286533
	38.5	-0.552989	0.403371	0.0165777	0.334906
	39	-0.641491	0.396511	0.0892576	0.386448
	39.5	-0.571341	0.461103	0.165207	0.296037
	40	-0.65942	0.594279	0.155977	0.278292
	40.5	-0.856477	0.434318	-0.2302	0.344273
	41	-1.00311	0.525981	0.0269194	0.465161
	41.5	-0.972874	0.511238	-0.423326	0.246289
	42	-0.431226	0.52009	-0.272314	0.278539
	42.5	-0.578463	0.453901	-0.592805	0.299509
	43	-0.730582	0.551259	-0.467415	0.305386
	43.5	-0.570409	0.516798	-0.49567	0.379757
	44	-0.391059	0.465055	-0.239544	0.478424
	44.5	-0.67977	0.452525	-0.185207	0.422037
	45	-0.68631	0.444873	-0.105928	0.40404
	45.5	-0.810781	0.470652	-0.107333	0.197452
	46	-0.877811	0.482774	0.103277	0.362375
	46.5	-0.564621	0.509988	0.244747	0.217555
	47	-0.766929	0.457764	0.349106	0.232389
	47.5	-0.481389	0.321997	0.0513829	0.492786
	48	-0.140537	0.43922	0.0671371	0.427139
	48.5	-0.458504	0.399135	0.0523329	0.38512
	49	-0.651712	0.41136	-0.366866	0.554973
	49.5	-0.724154	0.422874	-0.418961	0.520674
	50	-0.758066	0.526143	-0.108067	0.542864
	50.5	-0.716319	0.50957	-0.443567	0.41778
	51	-0.873429	0.511413	-0.223035	0.460224
	51.5	-1.01752	0.609737	-0.393285	0.346378
	52	-0.90079	0.473043	0.0464108	0.501425
	52.5	-1.05938	0.637991	0.0714717	0.486553
	53	-1.35373	0.62658	-0.0985862	0.525681
	53.5	-1.07455	0.720709	-0.217978	0.542346
	54	-0.996658	0.654609	-0.180882	0.57429
	54.5	-0.92951	0.612606	-0.280003	0.503524
	55	-1.02566	0.593043	-0.242195	0.526701
	55.5	-1.04113	0.573619	-0.44407	0.604246
	56	-0.995332	0.513105	-0.41998	0.535777
	56.5	-1.01264	0.573866	-0.301063	0.604997
	57	-1.06034	0.629071	-0.227229	0.654573
	57.5	-0.766051	0.586466	-0.166377	0.636118
	58	-0.757754	0.7796	-0.12316	0.624576
	58.5	-0.786071	0.786875	-0.0437852	0.581711
	59	-0.944137	0.740499	-0.454865	0.556268
	59.5	-0.46777	0.727344	-0.43437	0.518462
	60	-1.23288	0.774736	-0.584548	0.571135
	60.5	-1.28825	0.780195	-0.478945	0.576797
	61	-1.30701	0.80268	0.661511	0.858697
	61.5	-1.30547	0.668646	1.40609	0.711155
	62	-1.70061	0.645425	2.16739	1.07235
	62.5	-1.74518	0.678236	2.63097	1.04986
	63	-2.09925	0.663853	2.96425	0.842698
	63.5	-1.72289	0.749684	3.7193	0.971747
	64	-1.17058	0.737967	4.1995	0.876783
	64.5	-1.19957	0.77788	4.66395	0.902813
	65	-1.09691	0.724486	5.20144	0.902703
	65.5	-0.709247	0.584259	6.1625	0.971952
	66	-0.867951	0.593716	7.03964	1.13165
	66.5	-0.621912	0.643802	7.67593	1.00322
	67	-0.161142	0.687236	8.3624	0.902966
	67.5	0.0472189	0.757578	9.12886	0.808335
	68	0.395516	0.79668	9.61597	0.732423
	68.5	0.793177	0.811368	9.94952	0.70302
	69	1.41633	0.888327	10.1538	0.652068
	69.5	2.10753	0.824465	10.646	0.587383
	70	2.04159	0.938003	10.9809	0.6191
	70.5	1.86788	0.917993	11.2086	0.776176
	71	2.12194	0.931646	11.4339	0.779401
	71.5	2.17309	0.913261	11.7687	0.834585
	72	2.75783	0.800173	12.0772	0.979
	72.5	3.39321	0.678069	11.9562	0.97087
	73	3.75105	0.629033	12.3468	1.09
	73.5	3.89086	0.684055	12.3305	1.06329
	74	4.14941	0.693058	12.2534	1.09182
	74.5	4.06056	0.783134	12.5587	1.04214
	75	4.23866	0.901956	12.7016	1.07298
	75.5	4.66569	1.08943	12.6916	1.19178
	76	5.44956	1.10643	12.5975	1.17112
	76.5	5.59158	1.12288	13.1063	1.07679
	77	6.26238	1.00916	13.4821	1.14626
	77.5	6.75219	1.06231	13.9731	1.20176
	78	7.55581	0.817427	14.2462	1.04645
	78.5	8.04135	0.785763	14.7003	1.1328
	79	8.57699	0.820396	14.931	1.18257
	79.5	8.76305	0.997187	14.909	1.3078
	80	8.83226	1.08625	14.8223	1.38447
	80.5	9.30981	1.12952	14.7846	1.40619
	81	9.12246	1.18505	14.5887	1.34121
	81.5	9.06863	1.21246	14.6043	1.24839
	82	9.41085	1.14719	14.6438	1.18604
	82.5	9.66051	1.08296	14.7012	1.17967
	83	10.1641	1.05307	14.7387	1.18235
	83.5	10.4338	1.05179	14.8133	1.21929
	84	10.4758	0.992379	15.0074	1.38327
	84.5	10.3694	1.00946	15.0755	1.41834
	85	10.0108	1.10322	15.134	1.35837
	85.5	9.70415	1.15714	15.1765	1.24629
	86	9.88756	1.14687	14.9761	1.33368
	86.5	9.77667	1.09586	14.9338	1.30434
	87	9.94801	1.12801	14.5772	1.17528
	87.5	10.0606	1.0969	14.7643	1.22684
	88	10.1828	1.11633	15.1029	1.28664
	88.5	10.0545	1.15232	15.1738	1.24185
	89	10.1063	1.1446	14.7544	1.19386
	89.5	10.216	1.04696	14.9033	1.25002
	90	10.4969	1.12593	14.9664	1.24303
	90.5	10.4361	1.13131	15.0882	1.28604
	91	10.3832	1.09593	15.1062	1.39365
	91.5	10.521	1.08744	15.1179	1.43783
	92	10.6531	1.09822	15.3398	1.3807
	92.5	10.6178	1.06894	15.1885	1.37637
	93	10.978	1.16795	15.243	1.36056
	93.5	10.9728	1.28381	15.1987	1.3598
	94	11.1656	1.20866	15.2491	1.2579
	94.5	11.5775	1.11157	15.3751	1.24645
	95	11.5023	1.14822	15.3432	1.23507
	95.5	11.6125	1.10735	15.0564	1.20001
	96	11.0236	0.915155	15.413	1.13244
	96.5	11.0145	0.940529	15.4291	1.0986
	97	10.8712	0.997571	15.5197	1.14657
	97.5	10.9031	0.878008	15.4663	1.14581
	98	10.832	0.884056	15.8091	1.16677
	98.5	11.3402	0.825359	15.6399	1.20926
	99	11.366	0.886853	15.7822	1.29025
	99.5	11.8178	0.834716	15.7078	1.40978
	100	11.7847	0.894979	15.889	1.4433
	100.5	12.1414	0.732223	15.802	1.41274
	101	12.0618	0.805354	15.9286	1.32704
	101.5	12.4555	0.845861	15.9482	1.3098
	102	11.9516	0.707835	15.7667	1.11224
	102.5	12.0327	0.818391	15.8587	1.1027
	103	12.0338	0.786241	15.8517	1.14833
	103.5	12.1871	0.733276	15.9357	1.15292
	104	12.0394	0.892603	16.5316	1.37366
	104.5	12.2326	0.777469	16.2621	1.43086
	105	12.195	0.797158	16.1987	1.39182
	105.5	11.9437	0.778687	16.434	1.32727
	106	12.2215	0.707731	16.1371	1.28371
	106.5	12.2137	0.768393	16.1847	1.24102
	107	12.4685	0.877647	16.3572	1.18097
	107.5	12.4245	0.928333	16.5182	1.1079
	108	12.7896	0.841345	16.5132	1.08541
	108.5	12.7119	0.833779	16.3149	0.960311
	109	12.5428	0.851177	16.1442	0.973502
	109.5	12.2274	0.84362	15.9729	0.990839
	110	12.3492	0.726244	16.0877	0.999956
	110.5	12.211	0.900031	16.0252	0.896159
	111	12.0541	0.873499	16.0701	0.986175
	111.5	11.9994	0.85077	16.5315	1.16912
	112	12.5649	0.764454	16.4212	1.11694
	112.5	12.3788	0.807069	16.7885	1.16627
	113	12.6157	0.798485	16.9971	1.28254
	113.5	12.7528	0.792583	16.907	1.25997
	114	12.8725	0.844159	17.361	1.35291
	114.5	12.8033	0.919061	17.5262	1.35214
	115	12.5992	1.01718	17.5001	1.3504
	115.5	12.6059	0.93617	17.4702	1.21934
	116	12.9008	1.15084	17.4225	1.22709
	116.5	12.9611	1.12301	16.9863	1.32392
	117	13.0484	1.15921	16.7657	1.3625
	117.5	13.3591	1.06025	16.9489	1.31558
	118	13.4976	1.05496	16.8128	1.32837
	118.5	13.9292	0.949172	17.0581	1.32973
	119	13.613	1.0002	16.7929	1.35678
	119.5	13.0441	0.897269	16.9618	1.41185
	120	13.2526	0.747326	16.8089	1.43193
	120.5	13.4684	0.687479	16.7423	1.4335
	121	12.9631	0.784752	16.279	1.22895
	121.5	13.4032	0.65786	16.4268	1.21857
	122	13.265	0.684383	16.453	1.21297
	122.5	13.0454	0.628699	16.7345	1.15888
	123	12.7157	0.672722	16.5067	1.17409
	123.5	12.5148	0.771532	16.1302	1.35307
	124	12.247	0.737473	16.0706	1.37763
	124.5	12.8536	0.74692	16.0426	1.34155
	125	12.7572	0.823113	15.6704	1.33801
	125.5	12.7582	0.884115	15.8315	1.32464
	126	12.9533	0.898281	16.5704	1.47224
	126.5	13.0509	0.778716	16.5678	1.51377
	127	13.0175	0.876273	16.8538	1.5414
	127.5	12.8225	0.816069	17.0903	1.49306
	128	13.1305	0.771878	16.9492	1.49814
	128.5	12.9025	0.944255	17.1997	1.62966
	129	12.9149	0.993144	17.0658	1.58275
	129.5	12.4315	0.94532	16.9927	1.46011
	130	12.9843	1.09544	16.5592	1.47743
	130.5	13.0503	1.00886	16.3674	1.51122
	131	13.1545	0.95663	16.3775	1.3063
	131.5	12.6126	0.982588	16.5293	1.57676
	132	13.0905	0.911034	16.7021	1.60849
	132.5	12.7867	0.740011	16.6545	1.73948
	133	13.2647	0.68747	16.3399	1.67706
	133.5	13.2482	0.812807	16.4337	1.7397
	134	13.4156	0.75914	16.5777	1.81137
	134.5	13.5072	0.758036	16.3361	1.65882
	135	13.3314	0.905489	16.2301	1.66528
	135.5	13.0626	1.00435	16.5707	1.64591
	136	13.1887	0.728146	16.6215	1.64796
	136.5	13.3548	0.850344	16.6569	1.69419
	137	13.1586	0.888138	17.264	2.01757
	137.5	12.874	0.846833	17.5838	1.99148
	138	12.9009	0.836974	17.4284	2.00723
	138.5	12.7546	0.83178	17.1108	1.71251
	139	12.9074	0.780029	16.8346	1.37898
	139.5	12.9232	0.789028	16.5855	1.36619
	140	13.2526	0.741008	16.1496	1.25824
	140.5	12.8387	0.858858	16.0348	1.26918
	141	13.1138	0.81388	16.0602	1.23994
	141.5	12.7355	0.820283	15.7829	1.23174
	142	12.9471	0.815194	15.62	1.19383
	142.5	13.2376	0.728527	15.9011	1.22828
	143	13.4962	0.727236	16.1541	1.22218
	143.5	13.852	0.654802	15.8286	1.4197
	144	13.8685	0.656997	15.858	1.45618
	144.5	13.429	0.659354	17.037	2.15381
	145	13.66	0.660009	17.1107	2.13557
	145.5	13.4123	0.777846	16.9485	2.13206
	146	13.6651	0.911835	17.3358	2.17734
	146.5	13.9383	0.930405	17.7427	2.17464
	147	13.7836	0.922571	17.7431	2.18542
	147.5	14.0609	0.899218	17.7307	2.36725
	148	14.0368	0.704895	17.8785	2.36341
	148.5	14.103	0.704595	17.9301	2.34675
	149	14.2519	0.729707	17.8884	2.33299
	149.5	14.0716	0.69771	17.6562	2.2627
	150	13.4847	0.880995	17.5224	2.16975
	150.5	13.456	0.914854	17.4156	2.21481
	151	13.4291	0.887388	17.3982	2.08252
	151.5	13.1838	0.91633	17.339	2.08817
	152	13.6888	1.02273	17.5357	2.08674
	152.5	13.6837	1.03416	17.7885	2.19919
	153	13.3104	0.981809	17.7883	2.21234
	153.5	13.0939	0.829736	17.8315	2.29044
	154	13.2195	0.883161	18.0416	2.20263
	154.5	13.0365	0.960838	17.9335	2.25521
	155	13.5854	0.854797	17.7779	2.07198
	155.5	13.7856	0.881573	17.851	2.02853
	156	14.2076	1.10504	17.5657	1.91533
	156.5	14.0862	0.729101	17.759	2.19605
	157	13.637	0.789917	17.8329	2.1995
	157.5	13.4882	0.994004	18.1429	2.21571
	158	13.6016	0.790037	18.097	2.17922
	158.5	13.5385	0.937591	17.8968	2.01236
	159	13.545	0.864681	17.8609	1.95332
	159.5	13.8295	0.815068	17.4371	1.73374
	160	13.3304	0.822282	17.0058	1.62827
	160.5	13.6951	0.828997	17.3456	1.73877
	161	13.4628	0.761732	17.2479	1.71844
	161.5	13.4228	0.792927	17.2266	1.80687
	162	13.6743	0.673283	17.7425	2.11464
	162.5	13.6154	0.746372	17.8965	2.15186
	163	13.5776	0.694917	17.8143	2.03485
	163.5	13.8772	0.768784	17.796	2.04798
	164	14.6072	0.533689	18.0761	1.88054
	164.5	14.6692	0.609157	17.8974	1.79723
	165	14.4956	0.681881	17.6951	1.61178
	165.5	14.5659	0.623155	17.4777	1.60694
	166	14.4566	0.81214	17.6665	1.47464
	166.5	14.5232	0.816022	17.4482	1.44902
	167	14.4821	0.753279	17.3895	1.51818
	167.5	14.4129	0.851821	17.2088	1.56827
	168	14.7745	1.00415	17.1594	1.53962
	168.5	14.9197	0.960182	16.7713	1.61119
	169	15.0416	0.9467	17.1179	1.50457
	169.5	14.6313	0.969817	16.6579	1.51919
	170	14.4239	0.562102	16.7904	1.35936
	170.5	14.6736	0.728941	16.6393	1.29047
	171	14.6064	0.756979	16.4221	1.3663
	171.5	14.3313	0.719742	16.1535	1.13977
	172	14.915	0.841321	16.121	1.2324
	172.5	14.8045	0.790664	16.0597	1.30361
	173	14.6553	0.849182	16.0591	1.41789
	173.5	14.5294	0.900146	16.424	1.46715
	174	14.5839	0.824965	16.8676	1.4643
	174.5	14.2034	0.784862	16.7531	1.43341
	175	13.8638	0.85843	16.9681	1.37619
	175.5	13.6687	0.874017	16.8342	1.40776
	176	13.8138	0.886626	15.8825	1.05311
	176.5	14.0255	0.786707	15.7546	1.049
	177	13.9041	0.693896	15.9251	1.01271
	177.5	14.1603	0.769909	15.7758	1.02107
	178	14.4204	0.644102	16.1145	1.0156
	178.5	14.3368	0.788593	16.3781	1.19079
	179	14.7933	0.970839	16.4853	1.22029
	179.5	14.4821	0.880991	16.0783	1.41439
	180	14.6161	0.860036	15.6329	1.34658
	180.5	14.4831	0.765582	15.6789	1.06844
	181	14.5861	0.858638	15.6631	1.04958
	181.5	14.2396	0.876658	15.5454	1.03733
	182	13.6032	0.919321	15.9367	1.06376
	182.5	13.2808	1.01348	15.9602	1.08136
	183	14.147	1.01572	15.944	1.19799
	183.5	13.9474	0.946472	15.8674	1.24647
	184	14.0051	1.13942	15.6111	1.28976
	184.5	14.1303	1.04019	15.8616	1.3265
	185	14.2101	1.04653	15.6427	1.18934
	185.5	13.3218	1.05056	15.8496	1.25899
	186	13.2579	1.04328	15.9412	1.39016
	186.5	13.0576	1.05293	16.3325	1.32901
	187	13.6273	0.982452	16.4623	1.36607
	187.5	13.9413	1.00081	16.4952	1.33661
	188	14.5413	1.03346	16.5766	1.35411
	188.5	14.5398	1.05537	16.6731	1.38347
	189	14.7192	1.09944	16.5024	1.41902
	189.5	14.8531	1.05346	16.5638	1.26202
	190	14.2628	0.898058	16.2708	1.23835
	190.5	14.1096	0.839453	15.8387	1.28048
	191	14.2763	0.856017	15.6607	1.29416
	191.5	14.0876	0.91091	16.0021	1.40921
	192	13.6968	0.977389	16.1789	1.54336
	192.5	13.6705	0.971706	16.1747	1.60129
	193	13.7371	0.908185	16.5605	1.51374
	193.5	13.4644	0.962762	16.6991	1.57528
	194	13.4338	0.897602	16.4072	1.58124
	194.5	13.7226	0.912506	16.25	1.45609
	195	13.9209	0.826666	16.1354	1.52931
	195.5	13.6193	1.03738	16.259	1.67985
	196	13.7889	0.948742	16.2203	1.63194
	196.5	14.3542	0.982531	16.5106	1.5638
	197	14.8745	1.36654	16.477	1.49917
	197.5	14.5264	1.35894	16.3202	1.30184
	198	14.1087	0.943465	16.1949	1.20549
	198.5	14.0561	0.979183	16.6134	1.20192
	199	14.1071	0.978359	16.2018	1.23737
	199.5	14.8631	0.886842	16.3621	1.42778
	200	14.7037	0.743841	17.0125	1.73364
	200.5	14.8075	0.752366	17.0309	1.76895
	201	14.7049	0.778372	17.064	1.93482
	201.5	14.5394	0.732361	17.0092	1.99522
	202	14.2664	0.954744	17.1551	1.85522
	202.5	14.0745	0.990264	17.2513	1.83301
	203	14.0624	0.995978	17.0768	1.86415
	203.5	14.4636	0.945073	17.331	1.91681
	204	14.7858	0.868143	17.2461	1.89258
	204.5	14.4072	0.846704	16.9661	1.7188
	205	14.6356	0.803438	16.9997	1.56065
	205.5	14.4967	0.715599	16.6572	1.46978
	206	14.7455	0.758152	16.5463	1.49302
	206.5	14.7244	0.722007	16.647	1.49369
	207	14.6257	0.509158	17.0475	1.58901
	207.5	14.9518	1.1684	16.7762	1.61185
	208	14.5639	0.942152	16.7611	1.71871
	208.5	14.6508	0.823408	16.4975	1.63928
	209	14.5065	0.769935	16.2481	1.60224
	209.5	14.0891	0.848603	16.3768	1.58683
	210	13.8456	0.759079	16.6238	1.73674
	210.5	13.9956	0.848584	16.3269	1.61692
	211	13.8995	1.00221	16.4072	1.58453
	211.5	14.419	0.929541	16.0256	1.69726
	212	14.6139	0.975656	16.1344	1.7789
	212.5	14.6083	1.04011	16.254	1.7207
	213	14.8569	1.02627	16.4389	1.55184
	213.5	14.8834	0.97999	16.3071	1.52197
	214	14.8568	0.997939	15.9743	1.39933
	214.5	14.6258	1.01556	15.9759	1.27415
	215	14.9108	1.08352	15.8361	1.24147
	215.5	14.6304	0.937834	15.3685	1.25298
	216	15.3615	1.06133	15.0009	1.21415
	216.5	14.502	0.927203	14.9363	1.10238
	217	14.9012	0.92287	14.7728	1.1492
	217.5	14.5231	0.889773	14.9086	1.13488
	218	14.7436	0.970199	15.1941	1.28666
	218.5	14.7496	0.921551	14.8224	1.34017
	219	14.966	0.946859	14.9393	1.30135
	219.5	15.434	1.0033	15.0031	1.3353
	220	15.1704	1.0572	14.9316	1.20995
	220.5	14.9501	1.01003	14.9155	1.27737
	221	14.815	1.03621	14.7415	1.3874
	221.5	14.6685	0.998095	14.5958	1.38123
	222	14.1202	1.07586	14.6102	1.61875
	222.5	14.0093	0.925847	14.6224	1.51352
	223	14.3641	0.906099	14.5671	1.35434
	223.5	14.6351	0.86689	13.9649	1.4832
	224	14.5058	0.914855	13.9552	1.46168
	224.5	14.5284	0.948227	14.1858	1.45769
	225	13.961	1.00705	14.1574	1.32331
	225.5	14.0498	0.966497	14.6226	1.18882
	226	13.9954	0.995395	15.0216	1.13345
	226.5	14.3489	0.873007	15.2117	1.27375
	227	14.3096	1.00798	15.2111	1.28018
	227.5	14.5302	0.912887	15.5799	1.34036
	228	14.0649	1.00612	15.3121	1.41383
	228.5	14.1594	0.945214	15.136	1.35166
	229	13.6975	0.902103	15.0259	1.35555
	229.5	13.8906	1.00136	14.7327	1.46868
	230	14.3344	0.914878	14.6288	1.44956
	230.5	14.5618	0.906935	14.6738	1.43593
	231	14.1577	0.903134	15.6386	1.53739
	231.5	14.3965	1.08359	15.4994	1.50596
	232	14.216	0.978858	15.7746	1.39044
	232.5	13.9016	1.04081	15.8028	1.43749
	233	13.8426	1.01724	15.3424	1.26652
	233.5	14.2785	1.01244	15.3006	1.39709
	234	14.0548	1.09919	15.2234	1.23605
	234.5	13.2833	1.00711	15.0286	1.18368
	235	13.3883	1.06819	15.2019	1.33772
	235.5	13.09	1.02514	15.7318	1.32786
	236	12.9639	1.0762	15.4755	1.18971
	236.5	13.4217	0.909041	15.4532	1.24563
	237	13.672	0.943064	15.395	1.47584
	237.5	13.4586	0.873652	14.9567	1.43919
	238	13.4256	1.03667	14.6453	1.42613
	238.5	13.4676	0.83253	14.9593	1.44548
	239	14.2084	0.834079	15.3968	1.53373
	239.5	14.4627	0.85268	15.4746	1.47956
	240	14.7068	1.00362	15.6022	1.48162
	240.5	14.2586	0.948938	15.2986	1.45501
	241	14.0237	0.997707	14.6379	1.55583
	241.5	13.3884	0.900402	14.6071	1.44971
	242	13.3658	0.796241	14.656	1.47605
	242.5	13.4474	0.833243	14.7699	1.2656
	243	13.4627	0.910622	14.935	1.17485
	243.5	13.5237	0.797878	14.9757	1.08106
	244	13.8533	0.917921	15.2867	1.16295
	244.5	13.9972	0.873158	14.9691	1.21607
	245	13.9907	0.878281	15.1411	1.42522
	245.5	14.594	0.863004	15.2822	1.59945
	246	14.6169	0.976581	14.4857	1.68388
	246.5	14.3336	1.03978	14.7008	1.75577
	247	14.2825	1.0383	15.0007	1.69227
	247.5	14.4528	1.02756	14.8743	1.49086
	248	14.7959	0.848122	14.8764	1.43295
	248.5	14.3511	0.806542	14.755	1.41124
	249	13.8427	0.807876	14.1747	1.40443
	249.5	12.7798	1.03619	13.1951	1.30762

## Sheet: Fig.6e
	Time traces						Slope
		Control (unpaired)		5x spaced			Control (unpaired)	5x spaced
	Time (s)	Mean	SEM	Mean	SEM		0.787855	1.45915
	0	-0.0360116	0.156542	-0.0527163	0.180998		0.65884	1.134
	0.5	-0.122191	0.196487	0.0829997	0.292423		0.9255	1.3167
	1	-0.156291	0.227736	0.115357	0.396791		0.88435	1.0882
	1.5	-0.157667	0.276753	0.179139	0.395259		0.892495	0.961005
	2	-0.323246	0.313907	0.0806576	0.434878		0.846685	0.918185
	2.5	-0.383382	0.266359	0.173644	0.425754		0.98466	1.0756
	3	-0.271138	0.345714	0.280877	0.490668			1.0999
	3.5	-0.218928	0.369455	0.202281	0.396107			1.34705
	4	-0.0361027	0.297748	0.321542	0.493693
	4.5	0.0647014	0.255273	0.103177	0.440756
	5	0.0121408	0.364338	0.30928	0.519823
	5.5	0.133686	0.26332	0.261215	0.46339
	6	0.0643517	0.250392	0.190569	0.445654
	6.5	-0.203876	0.264238	0.0857614	0.378152
	7	-0.0573923	0.281141	0.0608191	0.396476
	7.5	-0.126198	0.243385	-0.221512	0.387372
	8	0.179224	0.224885	-0.299445	0.394545
	8.5	-0.0872877	0.138852	-0.0591164	0.465492
	9	0.0947108	0.214418	-0.000281299	0.376138
	9.5	-0.229659	0.175118	0.229271	0.292638
	10	-0.197584	0.157547	0.54983	0.319791
	10.5	-0.256641	0.181432	0.412234	0.37584
	11	-0.223346	0.11959	0.330915	0.267579
	11.5	-0.0949909	0.192595	0.223526	0.157678
	12	-0.0802715	0.163655	0.132515	0.327131
	12.5	0.108226	0.244535	0.0445331	0.327005
	13	0.101141	0.163202	0.114635	0.333814
	13.5	-0.109745	0.25169	0.257031	0.351645
	14	0.0714176	0.233094	0.509531	0.245163
	14.5	-0.131251	0.300466	0.123429	0.142068
	15	-0.180257	0.326794	0.272204	0.121164
	15.5	-0.354764	0.319557	0.0945155	0.118215
	16	-0.291637	0.328905	0.0788856	0.225625
	16.5	-0.0880143	0.427936	-0.0351128	0.232136
	17	0.0274781	0.354929	-0.0453578	0.22567
	17.5	-0.128853	0.350346	0.0732466	0.238163
	18	-0.00803295	0.363445	0.0927328	0.160184
	18.5	-0.107046	0.257457	-0.0125994	0.204147
	19	-0.0462702	0.338921	0.157119	0.203483
	19.5	-0.00807178	0.276915	-0.0312349	0.155454
	20	-0.160413	0.365371	0.111877	0.192124
	20.5	-0.577113	0.425869	0.304088	0.18405
	21	-0.488768	0.495056	0.365978	0.136189
	21.5	-0.366009	0.434181	0.125964	0.229115
	22	-0.501405	0.384543	0.232676	0.241609
	22.5	-0.0541907	0.256049	0.112008	0.24653
	23	0.0206144	0.179456	-0.0845942	0.301518
	23.5	0.0251136	0.207398	0.0128134	0.311973
	24	-0.144418	0.224046	0.117398	0.294939
	24.5	-0.126314	0.316126	0.173178	0.289765
	25	-0.291741	0.277059	0.088142	0.21915
	25.5	-0.170154	0.175511	0.146501	0.192157
	26	-0.120972	0.204227	-0.0450425	0.187063
	26.5	0.0762385	0.188218	0.106061	0.196235
	27	0.220303	0.294339	0.175214	0.276771
	27.5	0.229776	0.153945	-0.0202093	0.361466
	28	0.235721	0.190325	0.174724	0.316041
	28.5	0.528107	0.0992924	-0.191083	0.31417
	29	0.364017	0.133495	-0.196791	0.3074
	29.5	0.184179	0.177645	-0.220968	0.243836
	30	0.181751	0.188659	-0.0864321	0.257402
	30.5	0.175289	0.216695	-0.0500907	0.221392
	31	0.1433	0.235967	-0.0987376	0.19313
	31.5	0.22465	0.248355	0.0406671	0.221422
	32	0.205603	0.290372	0.207294	0.139012
	32.5	0.281563	0.216714	0.168795	0.185623
	33	0.201226	0.24893	0.209115	0.189484
	33.5	0.503542	0.215546	0.202703	0.237435
	34	0.219018	0.142568	0.180832	0.352996
	34.5	0.441435	0.202823	0.228813	0.347716
	35	0.213196	0.242451	0.456034	0.326344
	35.5	0.313992	0.231478	0.569433	0.293199
	36	0.321537	0.235142	0.251522	0.247853
	36.5	0.276141	0.233166	0.38717	0.30714
	37	0.0931898	0.17883	0.0688528	0.254023
	37.5	0.153426	0.170758	0.0173728	0.271835
	38	0.10145	0.191516	0.0201948	0.188357
	38.5	0.212497	0.193876	0.0821285	0.214209
	39	0.136822	0.261878	-0.154752	0.213443
	39.5	0.0883981	0.218576	-0.264132	0.183505
	40	0.348511	0.37801	-0.0666982	0.18329
	40.5	0.224964	0.311617	-0.103012	0.210101
	41	-0.0255458	0.273803	-0.107021	0.136693
	41.5	0.176182	0.271835	-0.109038	0.228237
	42	0.258111	0.339391	-0.184082	0.22295
	42.5	0.0539141	0.271014	-0.228149	0.267113
	43	0.022831	0.177102	-0.333497	0.245643
	43.5	-0.0725923	0.190538	0.0739871	0.292061
	44	-0.386502	0.373506	0.0276895	0.158281
	44.5	-0.209638	0.237732	-0.213818	0.182836
	45	0.178157	0.301927	-0.243448	0.187807
	45.5	0.224124	0.287999	-0.33929	0.272399
	46	0.494148	0.200492	-0.525345	0.28804
	46.5	0.432492	0.282427	-0.486745	0.3389
	47	0.257894	0.358476	-0.506062	0.372149
	47.5	0.0531443	0.277412	-0.462999	0.348962
	48	0.0732551	0.24416	-0.392027	0.259579
	48.5	0.0643196	0.411855	-0.189533	0.282351
	49	0.217363	0.325111	-0.430371	0.21215
	49.5	0.19402	0.19674	-0.336857	0.232095
	50	0.383748	0.251241	-0.350904	0.230493
	50.5	0.706814	0.359982	-0.0881015	0.274634
	51	0.549982	0.33357	-0.259855	0.237143
	51.5	0.484585	0.415376	-0.140549	0.322586
	52	0.224229	0.317536	-0.125685	0.37905
	52.5	0.1586	0.220585	-0.570834	0.375243
	53	-0.0855344	0.211752	-0.677873	0.340248
	53.5	-0.415885	0.218845	-0.790317	0.408095
	54	-0.303031	0.200262	-0.784974	0.33806
	54.5	-0.47195	0.238848	-1.08433	0.354084
	55	-0.650382	0.172608	-1.02081	0.346348
	55.5	-0.718051	0.346867	-1.17633	0.492362
	56	-0.930902	0.496128	-0.866938	0.500806
	56.5	-0.740746	0.435973	-1.2784	0.451327
	57	-1.03643	0.433489	-0.720588	0.460533
	57.5	-1.05885	0.41498	-0.846739	0.265312
	58	-1.2173	0.398321	-0.799305	0.206074
	58.5	-1.12372	0.438763	-1.24267	0.250887
	59	-0.899687	0.397967	-1.28621	0.305723
	59.5	-0.950738	0.374079	-1.2651	0.330512
	60	-0.819413	0.257755	-1.06895	0.425735
	60.5	-0.691002	0.436426	-0.374859	0.38347
	61	-0.523154	0.553228	0.569047	0.584666
	61.5	-0.353858	0.370008	0.75585	0.396408
	62	-0.628845	0.388992	1.00527	0.40907
	62.5	-0.238067	0.310028	1.52464	0.499825
	63	-0.0584799	0.606989	1.82971	0.435143
	63.5	0.0845963	0.548595	2.18399	0.430109
	64	0.510683	0.539241	2.87727	0.442546
	64.5	0.980989	0.42603	3.72235	0.536744
	65	1.1179	0.654274	4.1569	0.68053
	65.5	1.85134	0.667813	4.49052	0.657307
	66	1.66986	0.719058	5.13457	0.641391
	66.5	1.93345	0.780126	5.37643	0.629379
	67	1.70103	0.899592	6.02921	0.614717
	67.5	2.10549	0.776438	7.0188	0.661271
	68	1.97555	0.834011	7.46032	0.692165
	68.5	2.45396	0.818809	8.27038	0.669501
	69	2.73405	0.808085	8.88005	0.696345
	69.5	2.99334	0.88332	9.28769	0.57371
	70	3.14136	0.969682	9.7883	0.661162
	70.5	3.41869	0.937476	10.2448	0.668511
	71	3.56449	1.02175	10.7057	0.59191
	71.5	3.728	1.06287	11.3323	0.689139
	72	4.45441	1.13169	11.95	0.694109
	72.5	4.46847	1.24011	12.4156	0.551667
	73	4.73222	1.32805	12.6315	0.520818
	73.5	5.16941	1.40544	13.1599	0.643026
	74	5.58917	1.53321	13.3362	0.624555
	74.5	6.08881	1.51533	13.6964	0.636801
	75	6.2274	1.45205	14.1293	0.662089
	75.5	6.63972	1.46974	14.8033	0.724312
	76	7.23211	1.60681	14.9083	0.697748
	76.5	7.34493	1.55482	15.3336	0.682265
	77	7.6118	1.54539	15.5876	0.775813
	77.5	8.14367	1.73664	15.6052	0.767959
	78	8.90719	1.90701	16.1465	0.729894
	78.5	9.26285	1.94287	16.7252	0.813669
	79	9.56578	1.87469	16.6812	0.733081
	79.5	9.89287	1.82573	16.6986	0.847033
	80	10.0087	1.73443	17.1193	0.796117
	80.5	10.5199	1.73854	16.991	0.748386
	81	11.0057	1.48038	16.6904	0.754962
	81.5	11.4139	1.39177	16.7513	0.702566
	82	11.8985	1.30605	16.968	0.740191
	82.5	11.9406	1.3088	16.9945	0.883665
	83	12.2172	1.33755	16.8029	0.933415
	83.5	12.4347	1.22685	17.0795	0.850769
	84	12.5345	1.19085	17.4639	0.937691
	84.5	13.0633	0.978942	17.2868	0.879096
	85	13.4357	1.0262	17.6086	0.892079
	85.5	13.3984	0.813799	17.3285	0.915851
	86	13.4453	1.02315	17.5303	0.786879
	86.5	12.9797	0.700881	17.7063	0.770154
	87	13.5422	0.892014	17.8457	0.795925
	87.5	13.6353	0.916863	17.7902	0.786518
	88	14.2102	1.06973	17.7722	0.747746
	88.5	14.2166	0.970247	17.6809	0.718701
	89	14.3225	0.957039	17.8383	0.723466
	89.5	14.5713	0.974637	17.7267	0.783155
	90	14.6635	0.84151	17.8295	0.865419
	90.5	14.6258	0.821012	17.8366	0.850453
	91	14.7348	0.824818	17.9471	0.854027
	91.5	15.1152	0.822918	17.8459	0.831939
	92	15.1969	0.883272	17.5721	0.82719
	92.5	15.0627	0.844495	17.6302	0.849793
	93	15.0243	0.677942	17.9116	0.810431
	93.5	15.0934	0.696947	17.9886	0.708268
	94	15.2361	0.675093	17.8651	0.835329
	94.5	15.2249	0.667426	17.6735	0.801147
	95	15.6057	0.827292	17.5972	0.771444
	95.5	15.4363	0.991302	17.5638	0.788552
	96	15.773	0.858289	17.2471	0.859518
	96.5	15.5493	0.989868	17.4989	0.832658
	97	15.7507	0.955036	17.8608	0.928398
	97.5	15.7662	0.850447	17.8785	0.921717
	98	15.6348	0.996873	17.9405	0.87195
	98.5	15.4269	0.865439	17.9972	0.877329
	99	15.427	0.893049	17.7039	0.759228
	99.5	15.4439	0.869074	17.7808	0.710492
	100	15.3191	0.940872	17.6901	0.658373
	100.5	15.616	0.8347	17.5761	0.631429
	101	15.8004	1.06103	17.4931	0.670181
	101.5	15.8679	0.929446	17.638	0.717649
	102	16.0281	1.04481	17.7509	0.712483
	102.5	16.1564	0.89763	17.8675	0.777946
	103	16.1826	0.970352	17.7278	0.912416
	103.5	16.0259	0.819309	18.1572	0.941077
	104	15.9493	0.867458	17.9213	0.950492
	104.5	16.2583	0.635418	17.9397	0.965386
	105	16.2834	0.614962	17.7415	0.98075
	105.5	16.4104	0.628739	17.675	1.01216
	106	16.4346	0.676784	17.7131	0.94106
	106.5	16.3307	0.693712	17.9502	1.01373
	107	16.0689	0.729327	18.0225	0.957634
	107.5	16.1434	0.744907	18.0633	0.823621
	108	16.1323	0.781982	18.1143	0.797488
	108.5	16.1565	0.823874	17.7626	0.859117
	109	16.1366	0.899512	17.8094	0.807161
	109.5	16.0623	0.785162	17.6736	0.868565
	110	15.9473	0.941715	17.6545	0.905993
	110.5	15.8767	0.91259	17.5903	0.913617
	111	15.8836	0.924942	17.6938	0.98042
	111.5	15.8906	1.09394	17.6282	0.994378
	112	16.2116	1.34298	17.8518	0.970727
	112.5	16.2394	1.30441	17.8854	1.01145
	113	16.0054	1.28808	18.4334	0.834304
	113.5	15.9058	1.22427	18.2514	0.819537
	114	16.1785	1.23802	18.0741	0.892524
	114.5	16.3435	0.905963	17.8019	0.886632
	115	16.5874	1.02396	17.9901	0.831529
	115.5	16.6133	1.06852	17.934	0.949108
	116	16.8947	0.968572	17.9038	0.909314
	116.5	16.6485	1.0196	18.0521	0.946878
	117	16.1538	0.914413	17.9982	0.949307
	117.5	16.1282	0.891233	17.8274	0.920473
	118	16.183	0.838907	18.1285	0.915222
	118.5	16.1679	0.854147	18.2624	0.916043
	119	16.2788	0.788827	18.371	0.949596
	119.5	16.3979	0.792206	18.4888	0.880522
	120	16.3599	0.763437	18.3863	0.848019
	120.5	16.5968	0.815341	18.2742	0.813196
	121	16.7446	0.80088	18.2509	0.785719
	121.5	16.2769	0.918521	18.1781	0.812869
	122	16.2027	1.04307	18.19	0.801516
	122.5	16.2121	1.08491	18.167	0.837287
	123	16.3499	1.12047	18.3921	0.87793
	123.5	16.3917	1.06977	18.4625	0.889618
	124	17.0711	0.9085	18.4809	0.891359
	124.5	17.0837	0.834785	18.7151	0.969469
	125	17.1909	0.845086	18.6171	0.952614
	125.5	17.1938	1.05734	18.207	0.902886
	126	16.9776	1.08282	18.304	0.83279
	126.5	16.9158	0.979081	18.6855	0.813807
	127	16.7821	0.888874	18.475	0.816086
	127.5	16.5446	0.81863	18.3264	0.772456
	128	16.9819	0.899075	18.382	0.876761
	128.5	16.7464	1.08069	18.5988	0.845874
	129	16.6928	0.927779	18.181	0.8741
	129.5	16.7301	0.914393	18.0593	0.92916
	130	16.9144	0.678662	17.9698	0.895668
	130.5	17.3208	0.754143	18.2286	0.839755
	131	17.132	0.68091	18.4281	0.874692
	131.5	16.9827	0.751542	18.6079	0.924259
	132	17.147	0.759253	18.8416	0.823564
	132.5	17.1159	0.735341	18.9616	0.861218
	133	16.8694	0.74828	19.0652	0.830737
	133.5	17.2507	0.702421	19.0384	0.824348
	134	16.9144	0.64094	18.8099	0.822558
	134.5	17.4069	0.7047	18.6504	0.881497
	135	17.5429	0.719063	18.5911	0.882329
	135.5	17.337	0.74852	18.3812	0.79255
	136	16.88	0.725745	18.2689	0.735719
	136.5	16.523	0.830251	18.5483	0.677912
	137	16.3524	0.623428	18.4428	0.709171
	137.5	16.4727	0.658984	18.9014	0.769609
	138	16.9249	0.680467	18.8273	0.791473
	138.5	16.6173	0.618659	18.672	0.902509
	139	17.2008	0.702508	18.5243	0.885462
	139.5	17.0972	0.706098	18.3536	0.974441
	140	16.979	0.753357	18.4174	0.947493
	140.5	17.1579	0.826833	18.5289	0.979815
	141	17.1025	1.02763	18.7677	0.924493
	141.5	16.75	0.934234	18.7525	0.846028
	142	16.8727	0.970224	18.7814	0.819332
	142.5	16.8582	0.983906	18.3887	0.967155
	143	16.6776	1.08491	18.7905	0.800777
	143.5	16.9809	1.07855	18.4487	0.837683
	144	17.4908	1.06099	18.4842	0.855984
	144.5	17.832	1.02034	18.563	0.887183
	145	17.8961	0.935676	18.7452	0.878214
	145.5	17.4772	0.734367	18.2427	0.899116
	146	17.3715	0.725318	18.4086	0.958928
	146.5	17.3745	0.800649	18.5184	0.846277
	147	16.916	0.75487	18.1725	0.897905
	147.5	16.8166	0.934526	18.5318	0.934525
	148	17.0019	0.659788	18.8241	0.969352
	148.5	16.9649	0.761188	18.6502	0.919022
	149	17.2628	0.931555	18.5771	0.887249
	149.5	17.1219	0.773428	18.2596	0.928096
	150	16.7459	0.75846	18.2519	0.94655
	150.5	16.8256	0.675468	18.2041	0.992707
	151	16.8365	0.750657	18.3381	0.987507
	151.5	16.6477	0.682546	18.4817	0.93835
	152	17.0687	0.79643	19.0712	0.940604
	152.5	17.4177	0.953611	19.002	0.948779
	153	17.5844	0.87084	18.7952	0.927457
	153.5	17.3933	0.766679	18.8353	0.900653
	154	17.4658	0.781073	18.875	0.950417
	154.5	17.5925	0.835632	18.5267	0.869385
	155	17.1877	0.983968	18.6433	0.831325
	155.5	17.4251	1.02456	18.803	0.95141
	156	17.7567	1.21106	18.6839	1.03028
	156.5	17.6573	1.09177	18.4885	0.886761
	157	16.9665	1.01235	18.356	1.00298
	157.5	17.2251	0.892536	18.4284	0.99198
	158	17.2401	0.886957	18.1803	0.914139
	158.5	17.3537	0.77531	18.2721	0.741595
	159	17.7399	1.15313	18.6241	0.853537
	159.5	18.1974	1.16133	18.9118	0.832253
	160	17.4177	0.917973	19.0285	0.837393
	160.5	17.3294	0.948174	19.1845	0.865707
	161	17.3023	0.966646	19.139	0.870545
	161.5	17.2425	0.823302	18.789	0.852983
	162	17.3412	0.828689	18.6669	0.97322
	162.5	17.0475	0.706207	18.6099	0.983787
	163	17.3806	0.645231	18.6975	0.984995
	163.5	17.5027	0.768896	19.1027	1.02986
	164	17.4119	0.872124	19.1372	0.98626
	164.5	17.4059	0.961164	19.0015	0.938483
	165	17.7611	0.966941	19.2677	0.873863
	165.5	16.9705	0.901823	19.4375	0.872991
	166	16.9848	0.913359	19.294	0.800703
	166.5	16.9498	0.854943	18.9995	0.905693
	167	16.8874	0.981426	19.03	0.910792
	167.5	16.7966	0.974198	18.8217	0.818164
	168	16.8188	1.07063	18.8487	0.850163
	168.5	16.7932	1.19393	18.8216	0.918805
	169	16.6824	1.30826	18.7646	0.831292
	169.5	16.4241	1.28594	18.7979	0.752909
	170	16.8405	0.874756	18.9698	0.717782
	170.5	16.9478	1.08051	19.2534	0.736137
	171	17.2132	0.952738	19.3461	0.738994
	171.5	17.2353	0.927598	19.3143	0.842825
	172	17.7086	1.12125	19.3195	0.842623
	172.5	17.5802	1.11998	19.3465	0.889785
	173	17.6786	1.03907	18.7832	0.880956
	173.5	17.4307	1.00649	18.9473	0.79984
	174	17.4782	1.08022	19.1127	0.819092
	174.5	17.3576	1.18216	19.4548	0.81614
	175	16.974	1.15736	19.619	0.908601
	175.5	16.7152	1.00988	20.1076	0.7308
	176	16.6144	1.04981	19.6774	0.824429
	176.5	16.6803	1.12719	19.5419	0.833164
	177	16.8147	1.15031	19.5202	0.8219
	177.5	16.6891	1.11625	19.0757	0.797739
	178	16.8027	1.18846	19.128	0.746808
	178.5	16.7562	1.17345	19.2797	0.79412
	179	16.5908	1.12344	19.2374	0.835595
	179.5	16.2132	1.10111	19.1174	0.790847
	180	16.2097	1.12989	19.251	0.873904
	180.5	16.4628	1.14141	18.9121	0.900486
	181	16.6912	1.2883	19.1486	0.824244
	181.5	16.8565	1.17648	19.0199	0.892441
	182	16.9697	1.14725	19.25	1.01889
	182.5	16.9326	1.17748	19.2392	1.02035
	183	16.7486	1.22521	19.349	0.952563
	183.5	16.9425	1.26641	19.4754	1.07581
	184	16.5134	1.22371	19.8016	0.885893
	184.5	16.2259	1.14409	19.693	0.821981
	185	16.1549	1.22032	19.7686	0.789833
	185.5	16.1527	1.32617	19.9811	0.832227
	186	16.2319	1.34488	19.6376	0.74275
	186.5	16.1715	1.28747	19.5725	0.712642
	187	16.2524	1.30343	19.1749	0.750723
	187.5	16.6557	1.2883	19.2478	0.819254
	188	16.6908	1.2569	19.1682	0.774291
	188.5	16.7063	1.41006	19.0455	0.850426
	189	16.6048	1.37152	18.8929	0.733303
	189.5	16.402	1.14023	18.6641	0.722507
	190	16.259	1.2519	18.5364	0.685647
	190.5	16.547	1.22929	18.7888	0.683641
	191	16.3132	1.23819	18.8653	0.683904
	191.5	16.2978	1.35426	18.999	0.704423
	192	16.2841	1.32155	18.8406	0.726257
	192.5	16.5219	1.3521	18.9256	0.690895
	193	16.7879	1.44424	18.9888	0.775707
	193.5	16.5136	1.30877	19.1478	0.779134
	194	16.6233	1.25377	18.7433	0.877197
	194.5	16.6497	1.22737	19.2704	0.854378
	195	16.356	1.1979	19.4945	0.760672
	195.5	16.3197	1.28215	19.2374	0.774408
	196	16.0631	1.57043	19.4766	0.852762
	196.5	16.0666	1.72807	19.6507	0.728699
	197	16.3374	1.49671	19.5531	0.867349
	197.5	15.7787	1.73759	19.4884	0.839242
	198	15.9783	1.62273	19.2722	0.673037
	198.5	16.4167	1.44727	19.3678	0.620516
	199	16.3337	1.53383	19.2104	0.787097
	199.5	16.3387	1.54926	19.1646	0.87691
	200	16.3875	1.57372	18.9971	0.907283
	200.5	16.1789	1.58145	18.7751	0.916905
	201	15.9263	1.54627	18.6509	0.900755
	201.5	15.8042	1.56525	18.9329	0.908794
	202	16.2139	1.55242	19.1695	0.721254
	202.5	15.9996	1.36942	19.5335	0.786411
	203	16.1092	1.40141	19.8172	0.794519
	203.5	16.6601	1.52455	19.4828	0.690368
	204	16.6626	1.5089	19.5458	0.747365
	204.5	16.3075	1.74843	19.8797	0.695015
	205	16.277	1.75877	20.0571	0.867761
	205.5	16.3266	1.4311	19.8258	0.891564
	206	15.9392	1.26667	19.7763	0.917379
	206.5	15.6895	1.42805	19.5793	0.840291
	207	15.8647	1.53794	19.3419	0.833478
	207.5	15.5324	1.47501	19.1722	0.777499
	208	15.8211	1.55406	19.2949	0.799265
	208.5	16.1289	1.47149	20.0575	1.15659
	209	16.0192	1.47946	20.2487	1.17152
	209.5	15.8551	1.56872	20.3528	1.18547
	210	16.0649	1.61987	20.0893	1.08398
	210.5	16.0718	1.71156	20.27	1.01796
	211	16.1912	1.52702	20.3331	0.887544
	211.5	16.3275	1.39368	19.5126	0.765642
	212	16.3067	1.41232	19.7081	0.741601
	212.5	16.2329	1.43459	19.6132	0.609223
	213	15.7672	1.5871	19.1805	0.720622
	213.5	15.8971	1.36145	19.0672	0.776521
	214	15.7701	1.48068	19.6383	0.643381
	214.5	16.0607	1.32638	19.1935	0.585407
	215	16.222	1.30264	19.4257	0.735455
	215.5	16.228	1.48501	19.7214	0.600015
	216	16.12	1.2507	19.8775	0.634636
	216.5	16.4272	1.35008	20.0068	0.690794
	217	16.2555	1.7356	20.1869	0.720077
	217.5	16.1473	1.58983	19.9447	0.729602
	218	16.0595	1.51281	19.3742	0.745594
	218.5	16.4476	1.5476	19.1824	0.644931
	219	16.5199	1.5656	18.65	0.70652
	219.5	16.6175	1.60821	19.2048	0.699395
	220	16.5296	1.61232	19.329	0.728453
	220.5	16.6405	1.77005	19.3321	0.654044
	221	16.7128	1.80313	19.0811	0.720888
	221.5	16.5212	1.83051	19.2077	0.615542
	222	15.9803	1.61616	18.7825	0.658384
	222.5	16.1989	1.52325	19.0295	0.618999
	223	16.3762	1.39965	18.6922	0.661888
	223.5	15.8908	1.48159	19.1558	0.64336
	224	16.4322	1.44573	18.9784	0.640004
	224.5	16.2469	1.47882	19.6275	0.637818
	225	16.167	1.50895	19.7097	0.632469
	225.5	16.2565	1.58631	19.998	0.652695
	226	16.6067	1.77866	20.0218	0.729529
	226.5	16.3924	1.63154	19.931	0.939743
	227	16.7074	1.67778	19.5812	0.900155
	227.5	16.6112	1.74996	19.8412	0.856348
	228	16.4442	1.82082	19.824	0.84889
	228.5	16.4667	1.53107	19.5823	0.78859
	229	16.0675	1.77193	19.6247	0.771491
	229.5	15.9051	1.76321	19.5792	0.702522
	230	16.0822	1.83527	19.4715	0.801659
	230.5	15.7706	1.72149	19.7205	0.772204
	231	15.8486	1.81743	19.3018	0.772492
	231.5	16.4215	1.78303	19.6401	0.698377
	232	16.1173	1.67904	19.809	0.654286
	232.5	16.4798	1.60856	19.5234	0.707672
	233	16.2533	1.62	19.7816	0.720898
	233.5	16.0202	1.66527	19.9777	0.73184
	234	15.772	1.60702	20.0365	0.717675
	234.5	15.4654	1.67676	19.6989	0.848393
	235	15.2645	1.73109	19.825	0.828084
	235.5	15.4539	1.73325	20.2766	0.797403
	236	16.1288	1.65499	20.3923	0.778935
	236.5	16.3571	1.77763	20.3106	0.77243
	237	16.502	1.85896	20.4943	0.733886
	237.5	17.0158	1.66014	20.2949	0.647878
	238	16.9133	1.55567	20.0761	0.559364
	238.5	16.5539	1.89147	19.7559	0.615983
	239	16.3216	1.77357	19.6149	0.683861
	239.5	16.3602	1.77408	20.24	0.760782
	240	16.0925	1.74124	20.3758	0.778648
	240.5	15.8632	1.6603	20.2446	0.777473
	241	15.8468	1.6593	20.1073	0.869418
	241.5	15.8905	1.67948	20.3176	0.579185
	242	16.4713	1.79385	19.9662	0.505344
	242.5	16.2179	1.76485	20.3404	0.57278
	243	16.2298	1.86944	19.9518	0.657983
	243.5	16.0487	1.83726	19.9105	0.608657
	244	16.3466	1.87317	19.6513	0.600713
	244.5	16.1678	1.69893	19.7832	0.644467
	245	16.6539	1.64789	19.6449	0.667987
	245.5	16.8051	1.63335	19.9868	0.679209
	246	16.439	1.55754	20.0914	0.705437
	246.5	17.0352	1.70961	20.4672	0.633632
	247	17.3333	1.53972	20.3216	0.707008
	247.5	17.3321	1.52748	20.1323	0.786912
	248	18.1286	1.27921	20.3407	0.965781
	248.5	18.1618	1.23162	20.3575	1.00706
	249	17.3902	1.30304	20.0195	0.982389
	249.5	16.7682	1.48191	19.5193	0.930391

## Sheet: Fig.6f
	Time traces						Slope
		Control (unpaired)		5x spaced			Control (unpaired)	5x spaced
	Time (s)	Mean	SEM	Mean	SEM		0.68443	1.19135
	0	0.358377	0.330101	-0.192797	0.170258		1.00202	1.3622
	0.5	0.184574	0.52003	-0.114758	0.238507		0.79142	1.3887
	1	0.379219	0.628164	-0.269549	0.270217		1.3099	1.79695
	1.5	0.350768	0.661679	-0.192198	0.2612		0.912465	1.60365
	2	0.193623	0.715099	-0.0697975	0.248294		1.0324	0.898168
	2.5	0.0667576	0.641151	0.149616	0.266703		1.03294	1.34705
	3	-0.290359	0.618109	0.168196	0.265103		0.84773	1.375
	3.5	-0.206751	0.492516	0.0450252	0.312496
	4	-0.19417	0.472987	-0.0119714	0.251842
	4.5	-0.145516	0.413576	0.043706	0.228506
	5	0.254473	0.366588	0.157512	0.254923
	5.5	0.353428	0.341933	0.150814	0.254183
	6	0.425952	0.307006	0.279603	0.235876
	6.5	0.243825	0.305708	0.0981998	0.270127
	7	0.109359	0.369472	0.0625906	0.247545
	7.5	-0.134278	0.277538	0.0724382	0.247954
	8	-0.186195	0.31001	-0.0341309	0.323578
	8.5	-0.29324	0.377995	0.119312	0.279642
	9	-0.154407	0.501285	0.0624318	0.27282
	9.5	-0.269218	0.485378	-0.0461741	0.26278
	10	-0.330952	0.47362	-0.007929	0.289875
	10.5	-0.296684	0.648224	-0.100875	0.315335
	11	-0.330014	0.597232	-0.0724406	0.30387
	11.5	-0.634864	0.706595	-0.0409856	0.29684
	12	-0.673483	0.822832	-0.250965	0.348502
	12.5	-0.564461	0.774166	-0.363985	0.334895
	13	-0.379972	0.654055	-0.359195	0.370447
	13.5	-0.376681	0.618215	-0.511691	0.209125
	14	-0.370097	0.553866	-0.57601	0.222724
	14.5	-0.141193	0.489452	-0.374984	0.23515
	15	-0.250612	0.402621	-0.314209	0.212397
	15.5	-0.410837	0.384594	-0.0753429	0.176062
	16	-0.621691	0.511829	-0.113642	0.214141
	16.5	-0.552934	0.521363	-0.00299367	0.191621
	17	-0.376728	0.496317	0.119877	0.226492
	17.5	-0.345174	0.488708	0.221001	0.222967
	18	-0.364655	0.454301	0.352238	0.221185
	18.5	-0.327089	0.417796	0.267751	0.254226
	19	-0.265338	0.560484	0.324517	0.173919
	19.5	-0.370625	0.548455	0.35402	0.124238
	20	-0.380764	0.539762	0.239366	0.160857
	20.5	-0.156474	0.36278	0.0582866	0.216406
	21	-0.224644	0.39545	0.154488	0.198033
	21.5	0.105837	0.4326	0.0424141	0.281774
	22	-0.0785396	0.333696	0.0155366	0.242347
	22.5	-0.428672	0.468782	-0.171049	0.209404
	23	-0.611374	0.599242	-0.203353	0.304261
	23.5	-0.838554	0.75232	-0.354017	0.322001
	24	-1.10467	0.757101	-0.227155	0.240847
	24.5	-1.05372	0.751129	-0.313923	0.259057
	25	-0.876497	0.588533	-0.069106	0.200773
	25.5	-0.348646	0.361599	0.16095	0.284141
	26	0.394927	0.212961	0.343906	0.318224
	26.5	0.235452	0.24769	0.334574	0.269803
	27	0.457486	0.2851	0.484557	0.221594
	27.5	0.421719	0.210298	0.106233	0.228334
	28	0.164832	0.3234	0.152766	0.279216
	28.5	0.546301	0.286891	0.179802	0.275952
	29	0.265946	0.324475	0.0852946	0.220831
	29.5	0.15736	0.329572	-0.21906	0.150979
	30	0.15859	0.328828	0.0171847	0.309892
	30.5	-0.0251491	0.316238	-0.13062	0.387625
	31	0.0347721	0.357889	-0.0739429	0.381945
	31.5	0.344343	0.369219	-0.149564	0.375687
	32	0.568764	0.412342	0.152923	0.310735
	32.5	0.695439	0.398671	-0.0411137	0.254005
	33	0.763081	0.374931	0.0253838	0.347188
	33.5	0.657667	0.457276	0.143385	0.318284
	34	0.809818	0.469949	0.0617482	0.295537
	34.5	0.702544	0.535116	-0.195451	0.275656
	35	0.356564	0.597172	-0.221524	0.352748
	35.5	0.392496	0.612059	-0.371067	0.307764
	36	0.189842	0.592093	-0.215289	0.233218
	36.5	0.388221	0.570237	0.155957	0.203611
	37	0.490486	0.535414	0.132804	0.21546
	37.5	0.638544	0.483254	0.105282	0.21699
	38	0.832923	0.497677	0.0606151	0.142303
	38.5	0.921476	0.500756	0.0696411	0.141633
	39	0.933988	0.624437	-0.0296402	0.206308
	39.5	1.4077	0.924365	-0.0810588	0.174309
	40	1.42206	0.998745	-0.0831767	0.205796
	40.5	1.29975	1.01059	-0.0386259	0.126967
	41	1.36009	0.994798	-0.0525653	0.134408
	41.5	1.1588	0.805811	0.0293418	0.241773
	42	1.05112	0.793896	0.149594	0.331016
	42.5	1.00702	0.765173	-0.00681077	0.367185
	43	1.01865	0.731458	0.0776881	0.387237
	43.5	0.938557	0.742694	0.371619	0.233197
	44	0.0640101	0.341877	0.25336	0.187488
	44.5	-0.0865242	0.305411	0.141451	0.157329
	45	-0.261143	0.323879	0.113808	0.203983
	45.5	-0.0950721	0.37951	0.0947756	0.225767
	46	-0.370713	0.394406	-0.166005	0.235215
	46.5	-0.185478	0.412887	-0.0603061	0.269964
	47	-0.257062	0.431857	-0.0596968	0.275464
	47.5	-0.121453	0.475738	0.169647	0.307318
	48	0.147855	0.517563	0.245352	0.214352
	48.5	0.204341	0.545953	0.0463442	0.216066
	49	0.277108	0.470005	-0.0869855	0.193466
	49.5	0.497442	0.463908	-0.0147599	0.192595
	50	0.444175	0.45439	-0.420155	0.257891
	50.5	0.262882	0.419626	-0.392635	0.336378
	51	0.0631986	0.289721	-0.14749	0.20634
	51.5	-0.17135	0.271336	0.124145	0.246479
	52	-0.421831	0.334539	-0.0914695	0.218442
	52.5	-0.580231	0.314713	0.549442	0.272331
	53	-0.521902	0.341707	0.618543	0.24906
	53.5	-0.899858	0.364903	0.671777	0.1923
	54	-0.85043	0.32899	0.213333	0.311929
	54.5	-0.81339	0.437823	0.298615	0.296514
	55	-0.598762	0.439669	0.126728	0.287125
	55.5	-0.399325	0.363809	-0.0298909	0.244942
	56	-0.383837	0.376527	-0.120603	0.326144
	56.5	-0.493321	0.488876	-0.178746	0.316052
	57	-0.326151	0.365941	-0.0102787	0.372239
	57.5	-0.459029	0.38405	0.0424809	0.316804
	58	-0.589764	0.474144	0.343196	0.423929
	58.5	-0.299418	0.432732	0.330103	0.326254
	59	-0.319973	0.345019	-0.408417	1.04751
	59.5	0.105716	0.323916	-0.544159	1.03503
	60	0.152893	0.32707	-0.673649	0.982764
	60.5	0.390775	0.34035	0.0400771	0.419361
	61	0.406531	0.297176	0.107282	0.335893
	61.5	0.0966488	0.384954	0.643938	0.420438
	62	-0.127461	0.4159	0.781276	0.283865
	62.5	0.0243168	0.374585	0.762502	0.317394
	63	0.554881	0.231872	1.19674	0.420674
	63.5	0.80584	0.380845	1.68162	0.530965
	64	0.848169	0.617191	1.81632	0.446399
	64.5	1.42439	0.850143	2.70056	0.762596
	65	1.49494	0.877099	3.14668	0.89954
	65.5	2.10951	1.02932	3.73474	0.976832
	66	2.31493	1.0371	4.08356	0.997351
	66.5	2.58074	1.0967	4.68502	1.13444
	67	2.94897	1.20165	4.90989	1.16673
	67.5	3.36692	1.32439	5.38311	1.22444
	68	3.78432	1.45606	6.07237	1.39136
	68.5	3.93563	1.46576	6.39427	1.41936
	69	4.35506	1.4525	6.75561	1.4362
	69.5	4.86786	1.39967	7.09385	1.38148
	70	5.15325	1.47035	8.09697	1.46907
	70.5	5.6104	1.53598	8.9341	1.57781
	71	5.86598	1.58469	9.74104	1.64333
	71.5	6.21875	1.65398	10.3675	1.67548
	72	6.64576	1.71022	10.7863	1.63455
	72.5	6.86469	1.74266	11.2243	1.65693
	73	6.91564	1.73391	11.8486	1.64427
	73.5	7.10287	1.64594	12.2821	1.67359
	74	7.27576	1.63113	12.4613	1.61793
	74.5	7.889	1.6233	13.427	1.46014
	75	8.01354	1.46244	13.8746	1.43904
	75.5	8.81857	1.63287	14.4028	1.49445
	76	9.17051	1.77514	14.602	1.414
	76.5	9.61032	1.81373	15.0266	1.39275
	77	9.86173	1.77447	15.2727	1.2557
	77.5	10.3692	1.64367	15.8298	1.24198
	78	10.5853	1.675	16.1322	1.18724
	78.5	11.0573	1.54933	16.7025	1.10065
	79	11.2709	1.5283	16.788	0.915275
	79.5	11.4312	1.62403	16.906	0.709831
	80	12.0083	1.52218	17.2172	0.663139
	80.5	12.4748	1.4357	17.5912	0.569781
	81	12.9746	1.32118	17.8346	0.430189
	81.5	13.5592	1.26713	18.0485	0.329038
	82	13.8714	1.15337	18.5521	0.368984
	82.5	14.7114	1.3186	18.7282	0.318166
	83	15.0554	1.15505	19.1629	0.420237
	83.5	15.5031	1.16863	19.0986	0.442803
	84	15.9552	0.875597	19.1871	0.416824
	84.5	15.9406	0.804218	19.526	0.520681
	85	16.5689	0.802169	19.3659	0.44791
	85.5	16.9102	0.742204	19.6573	0.321112
	86	17.4668	0.604633	19.4539	0.289579
	86.5	17.7773	0.606085	19.7586	0.350986
	87	18.2298	0.63785	19.7025	0.449675
	87.5	18.0643	0.558426	19.3603	0.381164
	88	17.9123	0.518337	19.371	0.46574
	88.5	18.0186	0.611427	19.3783	0.455341
	89	17.9116	0.48672	19.2727	0.446081
	89.5	17.7585	0.577604	19.6383	0.428254
	90	17.547	0.65043	19.3484	0.473774
	90.5	17.7667	0.584051	19.616	0.371855
	91	17.8329	0.560483	19.8012	0.375143
	91.5	17.8248	0.625114	19.8148	0.457723
	92	17.9843	0.665875	20.1953	0.428782
	92.5	18.3099	0.754547	20.1635	0.440226
	93	18.4632	0.658347	20.0928	0.485083
	93.5	18.0222	0.665895	19.8243	0.414842
	94	17.8644	0.792695	19.9293	0.513053
	94.5	18.0073	0.906366	19.8967	0.40697
	95	17.5821	0.911798	19.7797	0.45653
	95.5	17.6558	0.943494	19.8876	0.349195
	96	17.7026	0.994738	19.9816	0.29269
	96.5	17.6164	1.00784	20.1781	0.297493
	97	17.7113	0.984354	19.9868	0.459268
	97.5	17.8265	0.963229	20.2099	0.519495
	98	17.9584	0.903037	20.5805	0.608064
	98.5	17.9834	0.70837	20.7626	0.608341
	99	18.4488	0.81966	20.6108	0.650025
	99.5	18.542	0.679344	20.7184	0.570454
	100	18.5839	0.679279	20.3593	0.454633
	100.5	18.8587	0.613544	20.2945	0.501631
	101	18.7742	0.760364	20.1955	0.537142
	101.5	18.5779	0.743385	20.388	0.601299
	102	18.6195	0.724263	20.2083	0.564823
	102.5	18.4799	0.747289	20.1682	0.554929
	103	18.763	0.901905	20.0018	0.562836
	103.5	19.0559	0.805195	20.3026	0.578889
	104	18.8838	0.919293	20.3683	0.548741
	104.5	18.8439	0.973364	20.378	0.623011
	105	18.7475	0.987969	20.1827	0.413783
	105.5	18.8892	0.986905	20.2093	0.511837
	106	18.6798	1.03957	20.1965	0.507837
	106.5	18.589	0.931291	20.2613	0.459705
	107	18.2769	1.09671	20.4	0.50408
	107.5	18.2345	1.03244	20.3168	0.437046
	108	18.1824	1.04641	20.4545	0.378858
	108.5	18.2307	1.12626	20.5124	0.368282
	109	18.5256	1.25389	20.7517	0.365179
	109.5	18.3143	1.14619	20.7793	0.397779
	110	18.6999	1.22162	20.7138	0.431794
	110.5	19.0205	1.29848	20.7464	0.443048
	111	19.1795	1.35506	20.6049	0.48796
	111.5	19.0191	1.35274	20.3899	0.455327
	112	19.1105	1.35444	20.4272	0.557805
	112.5	19.3517	1.24985	20.3256	0.555497
	113	19.1667	1.19332	20.3532	0.576116
	113.5	18.9832	1.1839	20.3362	0.560572
	114	19.094	1.20793	20.3161	0.486226
	114.5	18.9974	1.23409	19.8895	0.535763
	115	18.8004	1.25968	19.8675	0.508875
	115.5	19.1833	1.282	19.8743	0.55264
	116	19.1962	1.2812	20.1378	0.606688
	116.5	19.353	1.24928	20.2127	0.714431
	117	19.6247	1.18845	20.5046	0.663755
	117.5	19.6405	1.17342	20.338	0.719842
	118	19.803	1.24493	19.8645	0.742533
	118.5	19.8967	1.23291	19.3478	0.61403
	119	20.0309	1.39076	19.3336	0.540876
	119.5	20.0754	1.4551	19.5852	0.57324
	120	19.9703	1.46551	19.8805	0.489977
	120.5	20.2992	1.53008	19.9005	0.475249
	121	20.5028	1.44828	20.1737	0.473832
	121.5	20.3081	1.45672	20.1389	0.437854
	122	20.1973	1.47924	20.4819	0.53086
	122.5	20.3568	1.47151	20.2194	0.609694
	123	20.4106	1.41689	20.2162	0.588556
	123.5	20.314	1.58058	19.8597	0.484495
	124	20.6973	1.51965	19.8699	0.635001
	124.5	20.1327	1.52347	19.7732	0.610197
	125	20.0485	1.6584	19.7244	0.536704
	125.5	20.3944	1.49617	19.8874	0.462402
	126	20.5183	1.45999	19.8342	0.559292
	126.5	20.4051	1.49087	19.9975	0.532577
	127	20.407	1.36893	19.9902	0.539061
	127.5	20.1825	1.28825	20.178	0.81906
	128	20.1537	1.41612	20.1246	0.867777
	128.5	20.1225	1.45484	20.1764	0.980865
	129	20.3567	1.46952	19.9725	1.00634
	129.5	20.6365	1.51929	20.1418	1.07046
	130	20.767	1.49835	20.5819	0.920797
	130.5	20.8296	1.48628	20.4423	0.912267
	131	20.9496	1.51416	20.3158	0.695328
	131.5	21.0946	1.60326	20.2108	0.637217
	132	21.0107	1.62519	19.8895	0.505617
	132.5	20.9949	1.60991	19.4894	0.576425
	133	20.8887	1.6092	19.4554	0.635135
	133.5	20.5434	1.74148	19.6039	0.755999
	134	20.5163	1.55679	19.5818	0.727167
	134.5	20.6084	1.52576	19.6899	0.722938
	135	20.613	1.60874	19.6662	0.578692
	135.5	20.7602	1.50067	19.8226	0.554266
	136	20.656	1.40177	19.9345	0.416418
	136.5	20.6792	1.47566	19.9415	0.459748
	137	21.096	1.39548	19.743	0.450631
	137.5	20.9274	1.40717	20.1024	0.561407
	138	20.6007	1.46965	19.5728	0.533162
	138.5	20.3873	1.52148	19.4789	0.494134
	139	20.3193	1.47834	19.9136	0.443624
	139.5	20.176	1.47007	19.5747	0.426591
	140	20.3257	1.41846	19.579	0.497354
	140.5	20.931	1.37427	19.8469	0.581386
	141	20.5011	1.40343	19.5719	0.616009
	141.5	20.6402	1.15633	19.5157	0.603414
	142	20.2143	1.25166	19.9458	0.611229
	142.5	20.3526	1.05603	19.5428	0.686776
	143	19.8985	1.13055	19.4544	0.749265
	143.5	19.7354	1.04432	19.8795	0.627201
	144	19.7469	1.08137	19.8521	0.395181
	144.5	20.0682	1.02947	20.0315	0.620454
	145	19.9582	1.20834	19.664	0.282958
	145.5	20.0333	1.16661	19.7536	0.292884
	146	20.1123	1.21452	19.9483	0.517996
	146.5	20.1477	1.18094	20.3516	0.462942
	147	19.8374	1.19133	20.2667	0.492844
	147.5	19.7552	1.19989	20.3785	0.581353
	148	19.9797	1.14683	20.2514	0.507548
	148.5	19.6617	1.13909	20.5736	0.596459
	149	19.6336	1.14335	20.3695	0.675618
	149.5	19.8474	1.20786	20.806	0.661105
	150	19.9115	1.29853	20.554	0.667282
	150.5	19.9958	1.44696	20.5606	0.624963
	151	20.1682	1.40617	20.2086	0.628655
	151.5	19.9201	1.47055	20.1172	0.683236
	152	19.9769	1.41092	20.0985	0.691062
	152.5	19.6575	1.37229	19.9597	0.632069
	153	19.9028	1.36124	20.0264	0.638469
	153.5	19.7113	1.47388	20.1309	0.673738
	154	19.9823	1.63809	20.3775	0.585604
	154.5	20.1749	1.60857	20.3676	0.584415
	155	20.3937	1.66795	20.4672	0.740617
	155.5	19.9454	1.62365	20.2507	0.606649
	156	20.3174	1.67738	20.5753	0.647954
	156.5	20.251	1.70039	20.2871	0.534942
	157	20.326	1.7136	20.3814	0.675695
	157.5	20.3444	1.76444	20.5624	0.581442
	158	20.6812	1.88433	20.4682	0.575166
	158.5	20.6111	1.87287	20.657	0.561327
	159	20.4199	1.9498	20.5551	0.530831
	159.5	20.4693	1.91506	20.3563	0.621532
	160	20.5519	1.92209	20.4957	0.754562
	160.5	20.3273	1.88828	20.3528	0.59166
	161	20.8449	1.88396	19.8655	0.67017
	161.5	21.0517	1.80512	20.4732	0.592414
	162	20.8251	1.95664	20.622	0.560557
	162.5	20.5661	1.91472	20.0203	0.370757
	163	20.5675	1.95148	20.516	0.431877
	163.5	20.2143	1.90931	20.5812	0.422085
	164	20.4458	1.79989	20.4101	0.534469
	164.5	20.5355	1.87725	20.4018	0.568392
	165	20.6998	1.80816	20.518	0.71863
	165.5	20.5063	1.90556	20.4627	0.647223
	166	20.3259	1.93785	20.3427	0.541906
	166.5	20.4487	1.93494	20.3715	0.553973
	167	20.1767	1.98411	20.302	0.477424
	167.5	20.2662	2.1033	20.0656	0.312575
	168	20.4538	1.95256	20.06	0.284978
	168.5	20.4855	2.04411	19.9111	0.437831
	169	20.4766	2.02608	20.6969	0.325533
	169.5	20.4671	2.0461	20.7033	0.616431
	170	20.3663	2.04309	20.404	0.593563
	170.5	20.7597	1.98206	19.8251	0.586522
	171	20.715	2.0108	20.1332	0.657126
	171.5	20.8096	2.0637	19.5557	0.624714
	172	20.8325	2.05425	19.3467	0.621939
	172.5	20.8128	2.02042	19.4328	0.644243
	173	20.5787	1.96766	19.905	0.574643
	173.5	20.8536	1.93664	19.7963	0.537789
	174	21.0288	2.01716	20.3083	0.522425
	174.5	20.9267	1.94785	20.7211	0.539108
	175	20.6813	1.89266	20.9421	0.683315
	175.5	20.8353	1.9651	20.7758	0.715696
	176	20.724	1.96631	20.8077	0.738725
	176.5	20.7012	1.97552	20.2784	0.651445
	177	20.6836	1.98595	20.6161	0.719068
	177.5	20.9542	2.12638	20.4556	0.730929
	178	20.5866	2.15568	20.2089	0.697104
	178.5	20.2649	1.98909	20.1943	0.858706
	179	20.4691	2.04694	20.3158	0.855482
	179.5	20.5411	2.05249	19.6384	0.710363
	180	20.5983	1.87281	19.5606	0.683979
	180.5	20.7121	1.79851	19.8483	0.673125
	181	21.0146	1.98738	19.8788	0.761963
	181.5	20.8327	1.8602	19.8776	0.613349
	182	20.7136	1.84133	19.8438	0.61779
	182.5	20.3617	1.89805	20.3657	0.648512
	183	20.3687	1.96634	20.0937	0.710202
	183.5	20.4498	2.0085	20.2794	0.75124
	184	20.5437	2.06875	20.3805	0.726398
	184.5	20.9939	2.20922	19.9592	0.638631
	185	21.0738	2.27309	19.6898	0.709571
	185.5	21.0379	2.2217	19.9257	0.653039
	186	21.2945	2.21704	19.8539	0.74293
	186.5	21.1246	2.1298	19.4771	0.752718
	187	20.8622	2.08415	19.9277	0.820303
	187.5	20.995	2.0028	19.8915	0.797613
	188	20.7775	2.02561	19.8839	0.805792
	188.5	20.5126	2.13073	19.8098	0.81116
	189	20.4312	2.1169	20.4201	0.671046
	189.5	20.7646	2.09325	20.3404	0.662271
	190	20.4534	1.94804	20.1288	0.583203
	190.5	20.8704	1.97841	20.5754	0.540388
	191	20.9118	1.95543	20.7093	0.608175
	191.5	21.0719	2.04283	20.4923	0.606059
	192	20.9157	1.99028	19.9462	0.616123
	192.5	20.7843	1.94892	19.6622	0.619554
	193	20.2877	1.78105	19.8843	0.731277
	193.5	19.9322	1.71865	19.8235	0.726542
	194	19.9493	1.64814	20.1925	0.532656
	194.5	19.9247	1.65874	20.4019	0.708174
	195	20.2357	1.74083	20.2694	0.636454
	195.5	20.3114	1.79468	20.2894	0.702468
	196	20.4251	1.78501	20.2939	0.605906
	196.5	20.4206	1.74829	20.5649	0.666719
	197	20.3481	1.68465	20.4772	0.661203
	197.5	20.1907	1.75698	20.4178	0.735701
	198	19.8256	1.71547	20.3596	0.756477
	198.5	19.742	1.74313	20.2146	0.815843
	199	19.8592	1.61957	20.4185	0.676402
	199.5	19.8322	1.59782	20.2703	0.707171
	200	19.9081	1.67713	20.4046	0.696489
	200.5	20.0683	1.71572	20.3981	0.617641
	201	20.1609	1.79355	20.957	0.678667
	201.5	20.2489	1.7998	20.811	0.77079
	202	20.4469	1.73234	20.9646	0.742724
	202.5	20.2424	1.69192	20.639	0.801064
	203	20.2287	1.65902	20.7309	0.863594
	203.5	20.1232	1.76781	20.6205	0.848324
	204	20.1042	1.72539	20.3905	0.74063
	204.5	20.2347	1.81383	20.0075	0.684824
	205	20.5387	1.84032	20.347	0.653799
	205.5	20.1291	2.0546	20.4117	0.65678
	206	20.2633	2.05919	20.3707	0.611008
	206.5	20.3037	2.04121	20.3191	0.608586
	207	20.2399	2.03047	20.9275	0.671133
	207.5	19.5381	1.86242	20.7417	0.68209
	208	19.898	1.87483	20.5379	0.676945
	208.5	20.085	1.84406	20.3756	0.740073
	209	20.0512	1.82694	20.6666	0.803814
	209.5	20.0028	1.81202	20.3943	0.748236
	210	20.3884	1.88477	20.0266	0.775705
	210.5	20.1826	1.8691	19.9091	0.652029
	211	20.0601	1.92468	20.0077	0.764409
	211.5	20.2874	1.91629	19.9561	0.758316
	212	20.3566	1.97386	20.0659	0.727015
	212.5	20.4111	1.88003	20.3702	0.842651
	213	20.6321	2.04506	20.2685	0.817647
	213.5	20.59	2.16967	20.5897	0.701203
	214	20.4341	2.16498	20.2235	0.735404
	214.5	20.4522	2.29088	20.6162	0.667714
	215	20.4504	2.31914	20.3223	0.492132
	215.5	20.217	2.28187	20.6603	0.493874
	216	20.2511	2.30271	20.8028	0.554977
	216.5	20.5068	2.37132	20.6396	0.561195
	217	20.4021	2.38557	20.7383	0.614788
	217.5	20.1478	2.3946	20.3982	0.650705
	218	20.2664	2.43125	20.6052	0.665506
	218.5	20.3796	2.34137	20.3648	0.585342
	219	20.3409	2.40471	20.1834	0.594395
	219.5	20.6594	2.28095	20.2814	0.625521
	220	20.6163	2.30055	20.2108	0.567838
	220.5	20.81	2.24574	20.2961	0.51203
	221	20.5786	2.27525	20.2772	0.492654
	221.5	20.6841	2.25809	20.4635	0.703713
	222	20.4382	2.2643	20.3572	0.650438
	222.5	20.5356	2.34635	20.2908	0.634419
	223	20.3898	2.2801	20.2445	0.710036
	223.5	20.3936	2.29857	20.1699	0.717538
	224	20.2927	2.29158	20.4078	0.750941
	224.5	20.9235	2.49932	20.4225	0.672138
	225	20.5979	2.34615	20.5855	0.774725
	225.5	20.2235	2.4184	20.7207	0.799248
	226	20.6244	2.47452	20.6148	0.760244
	226.5	20.3158	2.3811	20.6378	0.705752
	227	20.2052	2.37913	20.5185	0.747877
	227.5	19.9844	2.26953	20.2549	0.710702
	228	19.9529	2.24315	20.0221	0.642239
	228.5	20.0359	2.2156	20.0106	0.869221
	229	20.0389	2.11845	20.183	0.787591
	229.5	20.0904	2.21647	20.0726	0.774933
	230	20.4521	2.31997	20.2336	0.934606
	230.5	20.65	2.39082	19.9839	0.85592
	231	20.4179	2.4994	20.0428	0.802261
	231.5	20.3437	2.5315	20.0078	0.76992
	232	20.3116	2.51559	19.7858	0.698789
	232.5	20.6867	2.37233	20.1064	0.729553
	233	20.5144	2.42757	20.4395	0.75003
	233.5	20.8629	2.40361	20.4862	0.663263
	234	20.7015	2.40164	20.1783	0.459263
	234.5	20.9604	2.40923	20.4864	0.547745
	235	20.7836	2.28386	20.5401	0.689627
	235.5	20.9283	2.23031	20.4986	0.655738
	236	20.6347	2.29361	20.2817	0.720219
	236.5	20.572	2.24469	20.3456	0.758224
	237	20.4462	2.32716	20.2383	0.812091
	237.5	20.0524	2.47683	20.8391	0.652184
	238	20.0969	2.35483	20.4134	0.589818
	238.5	20.2468	2.43339	20.5519	0.540617
	239	19.9305	2.44642	20.762	0.648222
	239.5	20.1276	2.42646	20.4772	0.68663
	240	20.4731	2.30881	20.1137	0.834863
	240.5	20.8189	2.42566	20.1109	0.872666
	241	20.723	2.33512	19.8603	0.876764
	241.5	20.7783	2.38308	19.8175	0.690643
	242	20.6277	2.26754	19.6943	0.633108
	242.5	20.1913	2.34314	20.1663	0.691129
	243	20.4388	2.39725	20.0033	0.701729
	243.5	20.5912	2.47516	20.0335	0.551333
	244	20.4187	2.53809	20.1791	0.51189
	244.5	20.7673	2.62337	20.1725	0.612274
	245	21.0713	2.73051	20.2582	0.769775
	245.5	21.0438	2.83448	20.8142	0.979286
	246	20.5685	2.83855	20.7595	0.993704
	246.5	20.7837	2.78285	20.7907	0.959894
	247	20.5878	2.6784	20.8016	0.958074
	247.5	20.6305	2.6208	20.8359	0.960028
	248	20.7473	2.72109	20.8045	0.969571
	248.5	20.5629	2.69024	20.7812	0.977239
	249	19.8162	2.59343	20.7538	0.986876
	249.5	18.79	2.58743	20.5254	1.09097

## Sheet: Fig.6g
	Time traces						Slope
		Control (unpaired)		5x spaced			Control (unpaired)	5x spaced
	Time (s)	Mean	SEM	Mean	SEM		0.298295	0.983485
	0	0.183122	0.208014	-0.037488	0.0769019		1.45415	0.9938
	0.5	0.234953	0.333438	-0.25365	0.253884		1.02988	0.944055
	1	0.135644	0.440313	-0.0067819	0.429865		1.04268	1.15635
	1.5	0.1005	0.465498	0.0425257	0.530046		1.2664	1.5474
	2	0.589543	0.446692	-0.182432	0.493086		1.3526	1.19225
	2.5	0.541485	0.398235	-0.0539331	0.495955		1.25753	0.91996
	3	0.152208	0.361835	-0.283884	0.357921		1.2001	1.098
	3.5	0.200529	0.426266	-0.32784	0.377466		1.23955	0.92149
	4	0.049621	0.365698	0.00532914	0.370951
	4.5	-0.0122219	0.344362	0.109408	0.408432
	5	0.276248	0.4347	0.0694484	0.368039
	5.5	0.354946	0.487353	0.0829431	0.292117
	6	0.426045	0.532469	0.171256	0.367531
	6.5	0.317241	0.422396	0.112315	0.211378
	7	0.26058	0.417508	0.0536457	0.211753
	7.5	-0.00174087	0.367734	0.0406766	0.253504
	8	-0.0166608	0.309371	0.0280795	0.254395
	8.5	0.00198994	0.302105	0.0073345	0.235883
	9	-0.0457179	0.308266	-0.29782	0.265138
	9.5	-0.0993593	0.247716	-0.0197047	0.298106
	10	0.109468	0.207992	-0.254785	0.336898
	10.5	0.0348241	0.2679	-0.633401	0.273984
	11	0.0505255	0.258177	-0.571053	0.123903
	11.5	0.0405915	0.349711	-0.444326	0.17278
	12	0.0525148	0.26037	-0.290263	0.331334
	12.5	0.0824989	0.186736	-0.230627	0.357621
	13	-0.245928	0.14347	-0.0598286	0.348092
	13.5	-0.110184	0.198662	0.491309	0.382757
	14	-0.0883592	0.229125	0.299959	0.205037
	14.5	-0.0976334	0.185973	0.356218	0.176237
	15	-0.0938111	0.160296	0.253208	0.182566
	15.5	0.263833	0.169131	0.0270757	0.183992
	16	0.278209	0.310223	-0.212987	0.174759
	16.5	0.152784	0.247373	-0.4214	0.179315
	17	0.0369955	0.270751	-0.289872	0.284626
	17.5	0.222303	0.257	-0.047328	0.154628
	18	0.321517	0.175171	0.189	0.197781
	18.5	0.145807	0.237945	0.285923	0.23687
	19	0.21292	0.288612	0.34789	0.247184
	19.5	0.367506	0.324345	0.0928763	0.222397
	20	0.292295	0.273546	0.117825	0.23474
	20.5	0.214034	0.241319	0.338301	0.261178
	21	0.160914	0.255521	0.0159719	0.231114
	21.5	0.0466125	0.342182	-0.0970472	0.245492
	22	-0.060584	0.407751	-0.221557	0.297883
	22.5	0.145763	0.320346	-0.166995	0.277523
	23	0.0345188	0.347402	-0.28773	0.37168
	23.5	0.322048	0.309818	-0.235859	0.30008
	24	0.276104	0.270001	-0.296841	0.341925
	24.5	0.420133	0.262253	-0.283754	0.264348
	25	0.121775	0.191658	-0.202734	0.221301
	25.5	0.141577	0.204247	0.0625667	0.199148
	26	0.0109986	0.261599	0.235222	0.201843
	26.5	0.1321	0.232475	0.359622	0.248779
	27	0.00518665	0.180884	0.219691	0.242472
	27.5	-0.0467574	0.221552	0.0259214	0.213332
	28	-0.102787	0.196709	-0.102202	0.270374
	28.5	0.21047	0.198035	-0.245847	0.302519
	29	0.441816	0.236132	-0.243201	0.304616
	29.5	0.221412	0.19345	-0.206727	0.31077
	30	0.237276	0.257915	-0.123421	0.25809
	30.5	0.122453	0.319709	0.189802	0.236609
	31	0.10198	0.325518	-0.0778016	0.166878
	31.5	-0.181371	0.287776	-0.0700605	0.234632
	32	-0.13605	0.29107	0.342081	0.222262
	32.5	-0.147977	0.329977	0.359493	0.244583
	33	-0.300765	0.298365	-0.032006	0.282937
	33.5	-0.36138	0.296427	0.503436	0.224531
	34	-0.344569	0.270319	0.213875	0.201688
	34.5	-0.107702	0.151234	-0.14527	0.238682
	35	-0.108577	0.0840366	-0.0376639	0.279808
	35.5	-0.28711	0.236088	0.211339	0.275118
	36	-0.330769	0.23307	0.335919	0.313103
	36.5	0.0104021	0.203183	0.327814	0.403192
	37	-0.0399074	0.217651	0.477931	0.255958
	37.5	0.129812	0.254926	0.618789	0.211965
	38	0.126758	0.2248	0.363305	0.254921
	38.5	0.0503983	0.196068	0.0624678	0.174418
	39	-0.115954	0.201233	-0.0977231	0.299075
	39.5	-0.241336	0.240505	-0.0938467	0.338053
	40	-0.447549	0.22577	0.171321	0.374037
	40.5	-0.38403	0.245593	0.103617	0.243395
	41	-0.192924	0.261163	0.173832	0.248264
	41.5	-0.218956	0.192363	0.30502	0.188736
	42	0.0330447	0.244279	0.203131	0.205948
	42.5	0.124289	0.197393	0.0785516	0.173553
	43	0.162365	0.131983	0.233377	0.193679
	43.5	0.213042	0.192084	0.0476081	0.286076
	44	0.00515736	0.18167	0.0040349	0.281464
	44.5	-0.025197	0.165363	0.024635	0.283664
	45	-0.0522572	0.224841	0.107078	0.324822
	45.5	0.0209125	0.18217	-0.149803	0.318744
	46	-0.0786025	0.153115	-0.0415573	0.364627
	46.5	-0.331257	0.242287	0.204411	0.455876
	47	-0.209345	0.277869	0.0150335	0.538362
	47.5	-0.139126	0.295702	0.356638	0.503117
	48	-0.19265	0.347763	0.31741	0.467214
	48.5	-0.424116	0.345766	0.468289	0.36452
	49	-0.285445	0.260543	0.359943	0.217244
	49.5	-0.320588	0.27037	0.52144	0.196829
	50	-0.235813	0.257804	0.461961	0.177224
	50.5	-0.167324	0.240019	0.361988	0.207885
	51	-0.0717815	0.228263	0.299385	0.292784
	51.5	0.0148413	0.226477	-0.0687866	0.196232
	52	0.193593	0.33924	-0.338124	0.295887
	52.5	0.290887	0.301285	-0.274392	0.333376
	53	-0.178508	0.381535	-0.411239	0.429891
	53.5	-0.210648	0.372457	-0.465758	0.205593
	54	0.219145	0.45535	-0.289114	0.275606
	54.5	0.518811	0.359553	0.0562301	0.29011
	55	0.48095	0.328653	-0.077901	0.413882
	55.5	0.530259	0.315026	-0.242579	0.39879
	56	0.612602	0.205266	0.0314845	0.421835
	56.5	0.367974	0.356644	-0.225502	0.414798
	57	0.161224	0.338395	-0.502531	0.470367
	57.5	-0.0169099	0.399232	-0.660905	0.455276
	58	0.0295878	0.327687	-0.351271	0.369343
	58.5	0.154423	0.403884	-0.353726	0.362506
	59	0.261598	0.340682	-0.629525	0.365137
	59.5	0.215255	0.323832	-0.732479	0.31375
	60	-0.608683	0.40805	-0.778146	0.315263
	60.5	-0.635629	0.433644	-0.955642	0.352539
	61	-0.401368	0.505235	-0.904388	0.372617
	61.5	-0.0689476	0.418915	-1.00584	0.428414
	62	-0.20384	0.290115	-1.0284	0.465337
	62.5	0.0458388	0.314092	-0.780028	0.510948
	63	0.043678	0.365929	-0.569102	0.580775
	63.5	0.643137	0.473707	-0.39836	0.583252
	64	0.5785	0.507975	-0.0834739	0.434911
	64.5	1.35488	0.676787	-0.344805	0.336744
	65	1.44858	0.553042	0.221525	0.50952
	65.5	1.63284	0.715384	0.569734	0.455534
	66	1.9446	0.738493	1.12846	0.471596
	66.5	2.14036	0.764027	1.39694	0.503555
	67	2.4631	0.858768	1.66387	0.483931
	67.5	2.75032	0.9798	2.17627	0.626282
	68	3.33008	1.13894	2.40432	0.671346
	68.5	3.93997	1.20178	2.62984	0.653747
	69	4.65401	1.30082	2.52081	0.805363
	69.5	4.71458	1.42163	3.2028	0.740771
	70	5.20809	1.41633	3.27364	0.809181
	70.5	5.96858	1.44167	3.8773	0.863503
	71	6.51945	1.53914	4.64045	0.947177
	71.5	6.81135	1.59742	5.13912	1.0958
	72	7.52051	1.65383	5.68298	1.28536
	72.5	7.71853	1.64551	6.09797	1.28355
	73	7.77107	1.63974	6.58163	1.39551
	73.5	8.08884	1.50089	6.69933	1.44545
	74	8.56779	1.48604	7.40839	1.56531
	74.5	9.00694	1.53514	7.49462	1.68958
	75	9.55276	1.60246	7.54071	1.67287
	75.5	10.3768	1.60118	8.53022	1.61437
	76	11.0337	1.67108	9.2129	1.66971
	76.5	11.3836	1.68301	9.72275	1.76863
	77	11.8124	1.63773	10.2291	1.85647
	77.5	12.4313	1.73428	10.5087	1.89765
	78	12.744	1.82144	10.9741	1.86115
	78.5	13.385	1.87519	11.6613	1.88752
	79	13.925	1.89658	11.8372	1.8274
	79.5	14.9514	1.99043	12.316	1.79601
	80	15.3747	1.87788	12.9355	1.74181
	80.5	15.7794	1.78027	13.6657	1.85384
	81	15.9741	1.81441	13.9996	1.77937
	81.5	15.8344	1.83277	14.2043	1.68403
	82	16.0837	1.82061	14.5294	1.71002
	82.5	16.188	1.77455	14.8132	1.76281
	83	16.4695	1.84863	15.2637	1.69281
	83.5	16.7957	1.83074	15.4119	1.57237
	84	17.4057	1.89557	16.2549	1.7133
	84.5	18.0324	1.9159	17.1099	1.81366
	85	18.5901	1.87932	17.812	1.76401
	85.5	18.8613	1.87268	18.0296	1.63067
	86	18.841	1.83104	18.3983	1.57142
	86.5	19.063	1.88723	18.2237	1.56645
	87	19.2743	1.87343	18.2822	1.55852
	87.5	19.4934	1.91689	18.768	1.44122
	88	19.7588	1.98764	19.0567	1.31106
	88.5	20.1008	2.00507	19.3432	1.28273
	89	19.9819	2.00938	19.4573	1.16303
	89.5	20.3056	2.00946	19.7396	1.10465
	90	20.4204	1.99803	20.057	0.926902
	90.5	20.3158	1.96629	20.2533	0.861272
	91	20.0502	1.78775	20.1344	0.843342
	91.5	20.1983	1.81504	20.4547	0.933136
	92	20.4107	1.8671	20.7181	0.851909
	92.5	20.4674	1.86248	20.5396	0.832518
	93	20.5943	1.89262	20.6485	0.827608
	93.5	20.5847	1.93437	21.0194	0.768589
	94	20.9659	1.82655	21.1416	0.730593
	94.5	20.8783	1.80262	21.6273	0.804061
	95	20.6223	1.85178	21.6402	0.741359
	95.5	20.8221	1.91007	21.7175	0.702946
	96	21.0122	1.82939	21.7362	0.709397
	96.5	20.7869	1.91924	21.4964	0.671622
	97	20.5391	1.89321	21.4614	0.70766
	97.5	20.5811	1.80349	21.2932	0.708926
	98	20.4973	1.84497	21.7191	0.554594
	98.5	20.5711	1.79295	21.7911	0.780662
	99	20.6045	1.78853	21.4678	0.694756
	99.5	20.6181	1.74169	21.5272	0.724311
	100	20.4377	1.78665	21.4461	0.928576
	100.5	20.7912	1.82551	21.197	0.92521
	101	21.0977	1.85246	21.3143	0.843875
	101.5	21.2266	1.85648	21.4441	0.897385
	102	21.2559	1.79619	21.7701	0.842468
	102.5	21.2428	1.70317	21.7804	0.768072
	103	20.915	1.6595	21.958	0.739123
	103.5	20.9515	1.70142	21.8745	0.764124
	104	20.9393	1.80478	21.6671	0.864573
	104.5	21.2247	1.87434	21.7522	0.851372
	105	20.962	1.83531	22.0942	0.859122
	105.5	20.9095	1.80666	22.0688	0.856415
	106	20.9111	1.8511	21.6545	0.880263
	106.5	20.8874	1.84589	22.0832	0.956688
	107	20.7517	1.8484	21.6877	1.00263
	107.5	20.8737	1.85034	21.6774	0.962372
	108	20.7762	1.84949	21.8611	0.891099
	108.5	20.9895	1.85032	21.9329	0.880373
	109	20.92	1.77438	22.1595	0.87361
	109.5	20.8993	1.74633	22.2061	0.821206
	110	21.3316	1.76946	22.3292	0.867749
	110.5	21.2735	1.76057	21.9938	0.832962
	111	21.251	1.75984	21.9992	0.926483
	111.5	21.7325	1.8087	21.8998	0.899886
	112	21.4803	1.88121	21.7887	0.782174
	112.5	21.1704	1.84281	21.8728	0.804925
	113	20.9969	1.81711	21.8374	0.823081
	113.5	21.1631	1.78498	21.8815	0.821553
	114	21.2199	1.78607	21.8355	0.88254
	114.5	21.3565	1.77543	21.7412	0.886169
	115	21.3286	1.73663	21.7413	0.882783
	115.5	21.2108	1.74862	21.8756	1.01096
	116	20.6595	1.72003	21.8977	0.95523
	116.5	20.456	1.7748	21.9024	0.962365
	117	20.3303	1.76519	22.2228	1.0618
	117.5	20.5402	1.69685	21.9837	1.13227
	118	20.7244	1.67115	21.5329	1.16336
	118.5	20.6321	1.67281	21.515	1.12278
	119	20.8367	1.68998	21.6888	1.0928
	119.5	21.0623	1.70779	21.8326	0.978184
	120	21.01	1.701	22.1586	0.791384
	120.5	21.022	1.68829	22.4045	0.771817
	121	20.8954	1.71522	22.2558	0.825783
	121.5	20.7402	1.69562	22.0165	0.796072
	122	20.8323	1.71008	21.8141	0.856605
	122.5	20.8181	1.73902	21.7558	0.91031
	123	20.9038	1.73508	21.2861	0.923996
	123.5	20.8405	1.77308	21.527	0.929617
	124	20.9203	1.77627	21.6312	0.938986
	124.5	20.983	1.75998	21.509	0.867245
	125	20.9434	1.76409	21.6143	0.840222
	125.5	20.591	1.77398	21.7305	0.836565
	126	20.7745	1.77689	21.6957	0.754622
	126.5	20.9546	1.82827	21.8255	0.636455
	127	20.8387	1.825	22.4796	0.874717
	127.5	20.96	1.73807	22.698	0.967398
	128	20.8484	1.71785	22.2521	1.06057
	128.5	20.8354	1.65549	22.268	1.01922
	129	20.726	1.59532	22.5241	1.15715
	129.5	20.8219	1.64376	22.201	1.0443
	130	20.8837	1.64589	21.8782	1.09774
	130.5	21.2205	1.66759	21.9148	0.951914
	131	21.1967	1.67736	21.7407	1.08811
	131.5	21.005	1.80118	21.8592	0.95458
	132	20.8926	1.67715	21.7424	0.982635
	132.5	20.8027	1.77489	21.74	1.01856
	133	21.0492	1.70897	21.7634	1.00525
	133.5	20.9947	1.78896	21.9366	0.944043
	134	21.437	1.76761	21.5764	0.840618
	134.5	21.4438	1.79792	21.4914	0.78429
	135	21.6052	1.75319	21.8432	0.775743
	135.5	21.7256	1.76212	21.8399	0.759395
	136	21.7906	1.73697	21.8434	0.752094
	136.5	21.9184	1.65062	21.5756	0.916248
	137	21.5608	1.67956	21.6296	0.924246
	137.5	21.4057	1.64948	21.6079	0.988454
	138	21.1843	1.6353	21.4371	1.02237
	138.5	21.1993	1.67322	21.5801	1.02768
	139	21.2137	1.68085	21.8341	0.947327
	139.5	21.277	1.72924	21.6544	1.06456
	140	21.3362	1.71342	21.6116	0.994662
	140.5	21.311	1.8119	21.3863	0.922237
	141	21.2861	1.77317	21.3949	0.944147
	141.5	21.6804	1.78027	21.3393	1.02613
	142	21.3977	1.77067	21.6833	0.932926
	142.5	21.1501	1.77243	21.5725	0.970238
	143	21.2888	1.7382	21.4864	0.86391
	143.5	21.2175	1.74819	21.7685	0.924928
	144	21.1076	1.73974	21.6361	0.922702
	144.5	21.2919	1.85674	21.3171	1.06835
	145	21.4515	1.7854	21.6677	1.00586
	145.5	21.9392	1.7255	21.7898	1.09197
	146	21.7989	1.73591	21.6329	0.989481
	146.5	21.829	1.67795	21.6367	1.10839
	147	21.378	1.61254	22.1437	1.08176
	147.5	21.483	1.71139	21.93	1.16969
	148	21.232	1.71054	21.5876	1.14993
	148.5	21.3769	1.75163	21.8756	1.16617
	149	21.2749	1.7078	21.6456	1.13672
	149.5	21.4107	1.68149	21.5652	1.02367
	150	21.3983	1.68269	21.7262	1.07141
	150.5	21.1306	1.63691	21.7317	1.07885
	151	21.1184	1.72619	21.6158	1.28572
	151.5	21.2521	1.73016	21.1835	1.25822
	152	21.2744	1.72216	21.334	1.19907
	152.5	21.2055	1.70954	20.8733	1.09563
	153	21.3866	1.73657	21.4298	1.05631
	153.5	21.4517	1.75245	21.4345	1.05867
	154	21.164	1.78662	21.1854	0.973807
	154.5	21.1015	1.75045	21.3991	1.1471
	155	20.8748	1.74262	21.4978	1.07572
	155.5	20.9837	1.73751	21.3525	1.05396
	156	21.5635	1.82544	21.1554	1.2243
	156.5	21.4502	1.76957	21.4409	1.27732
	157	21.6075	1.78579	21.2936	1.31229
	157.5	21.5259	1.68006	21.2022	1.28323
	158	21.5668	1.5794	21.3726	1.24455
	158.5	21.2259	1.52783	21.391	1.24723
	159	21.3312	1.56718	21.4082	1.20945
	159.5	21.2319	1.6147	21.3665	1.09219
	160	21.4272	1.6456	21.3316	0.988366
	160.5	21.2493	1.67112	21.5218	0.989171
	161	21.2033	1.74421	21.5132	0.920816
	161.5	21.2994	1.67386	21.5467	0.963948
	162	21.4891	1.63049	21.2422	0.994265
	162.5	21.5169	1.68767	21.2079	1.04756
	163	21.3465	1.68081	21.6075	1.09613
	163.5	21.264	1.60914	21.6923	1.08953
	164	20.9647	1.55809	21.8652	1.11003
	164.5	20.7977	1.54716	21.8029	1.13131
	165	20.8134	1.56827	21.5738	1.16427
	165.5	20.5126	1.6442	21.301	1.14976
	166	20.4178	1.56088	21.1861	1.08792
	166.5	20.4961	1.5789	21.102	1.03087
	167	20.4396	1.56132	20.9613	1.00136
	167.5	20.4076	1.54387	20.8964	0.97506
	168	20.5012	1.57945	21.2988	0.855049
	168.5	20.5407	1.59669	21.3112	0.823552
	169	20.599	1.6061	21.22	0.952677
	169.5	20.6395	1.59503	21.3299	1.03308
	170	20.5568	1.6042	21.863	1.02897
	170.5	20.4114	1.60139	21.8358	1.0486
	171	20.7364	1.67754	21.6754	0.96988
	171.5	21.0302	1.52482	21.7858	0.942102
	172	21.2195	1.58969	21.5926	1.02198
	172.5	21.2418	1.60512	21.583	0.909991
	173	20.9612	1.53298	21.4796	0.880469
	173.5	21.1104	1.62666	21.8362	1.04959
	174	21.1381	1.64187	21.2432	1.25945
	174.5	20.8923	1.64118	21.3377	1.24783
	175	21.0412	1.6864	21.5885	1.29423
	175.5	21.125	1.64429	21.517	1.21743
	176	20.831	1.64196	21.2518	1.02651
	176.5	20.8928	1.65272	21.2258	1.0048
	177	21.2037	1.55132	21.5571	1.03007
	177.5	20.9324	1.62551	20.952	1.00618
	178	20.7394	1.6828	21.1609	0.995973
	178.5	20.925	1.52014	21.2125	1.08986
	179	20.7512	1.45127	21.5311	1.11181
	179.5	20.6966	1.46358	21.5559	1.07447
	180	20.7254	1.46008	21.5201	1.16997
	180.5	20.6461	1.54331	21.6842	1.17963
	181	21.0832	1.59335	21.6653	1.02405
	181.5	21.041	1.61931	21.9996	1.02506
	182	20.7764	1.60634	21.8381	0.976753
	182.5	20.4638	1.61528	21.6912	0.969651
	183	20.6488	1.49727	21.5443	0.962368
	183.5	20.5514	1.51099	21.3041	0.883657
	184	20.4474	1.47741	21.1673	0.852364
	184.5	20.4496	1.45685	21.3781	0.840202
	185	20.6818	1.46625	21.1686	0.823721
	185.5	20.4989	1.42827	21.3057	0.880729
	186	20.7372	1.47998	21.4041	0.965696
	186.5	20.5729	1.44907	21.2657	0.992176
	187	20.5886	1.49454	21.0658	1.11504
	187.5	20.4581	1.48969	21.0104	1.04343
	188	20.4676	1.52847	20.9174	1.12681
	188.5	21.0998	1.51902	20.8992	0.969403
	189	21.2216	1.57554	20.7433	0.999898
	189.5	21.1346	1.59275	20.8516	0.955089
	190	21.2642	1.59542	20.7595	0.95731
	190.5	21.2366	1.55126	20.9614	1.03463
	191	21.0114	1.5625	20.9947	1.17301
	191.5	20.9767	1.55183	20.9787	1.16021
	192	21.0601	1.50796	21.211	1.20324
	192.5	21.2496	1.54423	20.9317	1.29271
	193	21.1273	1.5517	21.2123	1.1179
	193.5	21.2517	1.53279	20.9896	1.11168
	194	21.2131	1.62073	20.7662	1.10639
	194.5	21.1911	1.61103	20.3806	1.11039
	195	21.2908	1.67896	20.6906	1.16556
	195.5	21.4511	1.64596	20.6371	1.24754
	196	21.3817	1.5585	20.8716	1.21469
	196.5	21.2076	1.50452	20.7708	1.22167
	197	21.0189	1.48967	20.9649	1.24092
	197.5	21.7266	1.54298	21.2914	1.21685
	198	21.2071	1.55024	21.0181	1.14521
	198.5	21.3971	1.59499	21.3647	1.1197
	199	21.5566	1.66822	21.5022	1.16205
	199.5	21.1955	1.61052	21.5215	1.10778
	200	20.6365	1.58369	21.1383	1.08016
	200.5	21.1379	1.54587	21.3368	1.02611
	201	20.8906	1.58962	21.0148	1.14476
	201.5	20.8616	1.64922	20.7572	1.10064
	202	20.8565	1.66437	20.488	1.185
	202.5	21.0367	1.70434	20.2474	1.35308
	203	20.916	1.69786	20.3215	1.34788
	203.5	20.8308	1.69824	20.6642	1.2501
	204	21.0172	1.68123	20.3531	1.16688
	204.5	21.3392	1.66957	20.2704	1.10896
	205	21.5033	1.64926	20.2731	1.1098
	205.5	21.4244	1.64223	20.2596	1.10298
	206	21.5073	1.64428	20.4763	1.11822
	206.5	21.5315	1.53474	20.6173	1.18295
	207	21.2758	1.53297	21.106	1.24515
	207.5	20.9064	1.61924	20.9656	1.22406
	208	20.9519	1.61935	20.5507	1.14407
	208.5	20.9511	1.59448	20.8696	1.1678
	209	21.2621	1.66341	21.087	1.16005
	209.5	21.2766	1.49908	20.9545	1.34841
	210	21.4465	1.49832	20.7012	1.31137
	210.5	21.0493	1.36131	21.0683	1.36762
	211	21.1009	1.47447	20.6553	1.31063
	211.5	21.0807	1.42116	20.8224	1.28342
	212	21.0144	1.42661	20.5085	1.18295
	212.5	20.8804	1.4511	20.6134	1.21713
	213	20.8373	1.45642	20.9389	1.11339
	213.5	20.887	1.40011	20.9757	1.02397
	214	20.8181	1.47891	21.0024	0.957305
	214.5	20.8953	1.5013	20.9842	1.05179
	215	20.7314	1.54619	21.0509	1.1337
	215.5	20.9847	1.5817	20.7004	1.09976
	216	21.0733	1.5866	21.2381	1.06632
	216.5	21.1136	1.5528	21.2779	1.13358
	217	21.236	1.54776	21.1753	1.22944
	217.5	21.2032	1.57876	20.8376	1.19764
	218	20.8814	1.49268	20.9175	1.23621
	218.5	20.7475	1.52112	20.824	1.28814
	219	20.7827	1.56054	20.8734	1.25109
	219.5	20.7972	1.55226	20.5982	1.43904
	220	21.0861	1.56521	20.886	1.41539
	220.5	21.2448	1.60309	21.0244	1.20798
	221	21.6608	1.61021	20.5441	1.31831
	221.5	21.7377	1.63785	20.595	1.35009
	222	21.7096	1.62911	21.1688	1.37882
	222.5	21.5715	1.63614	20.9642	1.3178
	223	21.2693	1.6416	20.897	1.28741
	223.5	20.949	1.58469	20.7535	1.24469
	224	20.8728	1.6092	20.515	1.16849
	224.5	20.639	1.53804	20.3607	1.04897
	225	20.6906	1.52322	20.2033	1.08448
	225.5	20.5922	1.48819	20.7	1.15464
	226	20.6312	1.51638	20.8049	1.14355
	226.5	20.8154	1.5247	21.0534	1.16088
	227	20.687	1.54467	21.312	1.25939
	227.5	21.184	1.57247	21.1945	1.45016
	228	21.2283	1.55281	20.8838	1.3047
	228.5	21.2143	1.59156	20.8784	1.32677
	229	21.102	1.54407	21.0906	1.36876
	229.5	20.9036	1.48691	20.9459	1.22266
	230	20.5893	1.46092	20.5346	1.33149
	230.5	20.7549	1.49301	20.4888	1.1966
	231	20.4907	1.54462	20.4265	1.21933
	231.5	20.6783	1.52806	20.2883	1.27701
	232	20.747	1.56241	19.9508	1.40024
	232.5	20.7317	1.56208	20.3098	1.33879
	233	20.8895	1.58634	19.9487	1.43749
	233.5	21.0201	1.5133	20.0667	1.42493
	234	21.0071	1.5122	20.0017	1.39418
	234.5	21.0784	1.56063	20.0978	1.20668
	235	21.3949	1.58974	20.5537	1.10071
	235.5	21.2568	1.57056	20.8567	1.12375
	236	21.1109	1.56219	20.6058	1.09715
	236.5	20.9251	1.53966	21.2053	1.19019
	237	20.5507	1.54124	20.7874	1.29156
	237.5	20.6792	1.56218	20.7957	1.28549
	238	20.6761	1.55837	20.4659	1.34376
	238.5	20.9966	1.57922	20.8965	1.32583
	239	21.1258	1.61233	20.6334	1.2582
	239.5	21.0334	1.57885	20.8792	1.1938
	240	20.9471	1.54773	20.7941	1.32393
	240.5	20.9527	1.49863	20.7347	1.26661
	241	20.974	1.5009	20.7384	1.31333
	241.5	20.9277	1.53749	20.6075	1.32639
	242	21.2453	1.53641	20.5497	1.32077
	242.5	21.1412	1.58749	20.5345	1.24245
	243	20.7088	1.65721	20.3016	1.22772
	243.5	20.715	1.57925	19.774	1.34294
	244	20.3488	1.61777	20.0436	1.2467
	244.5	20.2896	1.62395	19.9825	1.3668
	245	20.3356	1.48395	19.8621	1.45608
	245.5	20.4631	1.45398	19.9032	1.53224
	246	20.4972	1.42923	20.1895	1.41604
	246.5	20.9361	1.50571	20.2417	1.37951
	247	21.0375	1.49427	20.5878	1.41379
	247.5	21.2383	1.5132	20.433	1.38165
	248	21.2551	1.54177	20.7499	1.31009
	248.5	21.0726	1.51269	20.3639	1.35374
	249	20.4453	1.47932	19.7583	1.42734
	249.5	19.129	1.63932	18.9053	1.52128
