# Supplementary material for: PKCδ is an activator of neuronal mitochondrial metabolism that mediates the spacing effect on memory consolidation
Source: eLife. 2024 Oct 30;13:RP92085. doi: 10.7554/eLife.92085 (PMC11524582; doi:10.7554/eLife.92085)
Supplement: Table 1—source data 1. [file elife-92085-table1-data1.xlsx]

## Sheet: Feuil1
	Shock Avoidance				Naive odor avoidance									Shock Avoidance				Naive odor avoidance									Shock Avoidance				Naive odor avoidance
					Octanol				Methylcyclohexanol									Octanol				Methylcyclohexanol									Octanol				Methylcyclohexanol
	tub-GAL80ts; VT30559-GAL4/+	tub-GAL80ts; VT30559-GAL4>UAS-PKCδ RNAi JF02991	+/UAS-PKCδ RNAi JF02991		tub-GAL80ts; VT30559-GAL4/+	tub-GAL80ts; VT30559-GAL4>UAS-PKCδ RNAi JF02991	+/UAS-PKCδ RNAi JF02991		tub-GAL80ts; VT30559-GAL4/+	tub-GAL80ts; VT30559-GAL4>UAS-PKCδ RNAi JF02991	+/UAS-PKCδ RNAi JF02991			tub-GAL80ts; VT30559-GAL4/+	tub-GAL80ts; VT30559-GAL4>UAS-PKCδ RNAi KK109117	+/UAS-PKCδ RNAi KK109117		tub-GAL80ts; VT30559-GAL4/+	tub-GAL80ts; VT30559-GAL4>UAS-PKCδ RNAi KK109117	+/UAS-PKCδ RNAi KK109117		tub-GAL80ts; VT30559-GAL4/+	tub-GAL80ts; VT30559-GAL4>UAS-PKCδ RNAi KK109117	+/UAS-PKCδ RNAi KK109117			tub-GAL80ts; c739-GAL4/+	tub-GAL80ts; c739-GAL4>UAS-PKCδ RNAi JF02991	+/UAS-PKCδ RNAi JF02991		tub-GAL80ts; c739-GAL4/+	tub-GAL80ts; c739-GAL4>UAS-PKCδ RNAi JF02991	+/UAS-PKCδ RNAi JF02991		tub-GAL80ts; c739-GAL4/+	tub-GAL80ts; c739-GAL4>UAS-PKCδ RNAi JF02991	+/UAS-PKCδ RNAi JF02991
	0.69	0.8	0.59		0.88	0.81	0.7		0.48	0.63	0.58			0.4	0.34	0.32		0.4	0.49	0.29		0.64	0.62	0.7			0.85	0.77	0.86		0.79	0.54	0.15		0.53	0.62	0.67
	0.86	0.91	0.88		0.79	0.68	0.42		0.31	-0.01	0.68			0.23	0.24	0.25		0.51	0.54	0.62		0.66	0.76	0.67			0.75	0.5	0.6		0.74	0.41	0.42		0.26	0.31	0.55
	0.76	0.84	0.5		0.8	0.38	0.65		0.6	0.82	0.4			0.9	0.5	0.44		0.46	0.6	0.56		0.88	0.7	0.61			0.64	0.28	0.53		0.54	0.5	0.32		0.61	0.35	0.46
	0.61	0.78	0.62		0.71	0.36	0.74		0.87	0.73	0.71			0.38	0.62	0.75		0.74	0.79	0.76		0.75	0.8	0.73			0.38	0.54	0.79		0.7	0.45	0.47		0.47	0.34	0.63
	0.67	0.53	0.82		0.42	0.2	0.44		0.94	0.69	0.86			0.69	0.68	0.57		0.81	0.79	0.68		0.81	0.5	0.42			0.08	0.33	0.21		0.64	0.38	0.59		0.58	0.3	0.09
	0.46	0.76	0.55		0.52	0.81	0.2		0.96	0.79	0.74			0.51	0.3	0.19		0.62	0.85	0.68		0.61	0.76	0.51			0.33	0.4	0.45		0.56	0.36	0.65		0.12	0.54	0.63
	0.77	0.71	0.69		1	0.58	-0.07		0.87	0.61	0.03			0.48	0.44	0.38		0.73	0.76	0.78		0.42	0.53	0.26			0.35	0.19	0.22		0.74	0.62	0.63		0.57	0.6	0.62
	0.18	0.75	0.61		0.77	0.41	0.37		0.72	0.53	0.61			0.55	0.45	0.36		0.66	0.76	0.66		0.58	0.86	0.79			0.65	0.57	0.82		0.49	0.45	0.37		0.36	0.55	0.68
	0.71	0.88	0.57		0.71	0.53	0.52		0.85	0.64	0.68			0.38	0.48	0.54		0.58	0.68	0.4		0.77	0.73	0.81			0.09	0.04	0.36		0.65	0.63	0.7		0.49	0.64	0.67
	0.82	0.82	0.85		0.8		0.59		0.56		0.46			0.42	0.39	0.38		0.84	0.76	0.61		0.44	0.51	0.5			0.38	0.36	0.46		0.51	0.52	0.54		0.41	0.21	0.52
	0.4	0.57	0.55				0.26				0.39			0.44	0.27	0.61		0.53	0.62	0.43		0.49	0.62	0.48			0.33	0.16	0.24		0.14	0.19	0.47		0.63	0.79	0.56
	0.58	0.73	0.49											0.29	0.35	0.31		0.66	0.78	0.34		0.86	0.67	0.79			0.45	0.33	0.5		0.49	0.36	0.43		0.44	0.39	0.42
																											0.47	0.5	0.27
																											0.56	0.63	0.54
